# Supplementary material for: Carbon footprint analysis through constructing a multi-region input–output table: a case study of Japan
Source: Springer Nature journal article supplement (doi:10.1186/s40008-015-0015-6), 2015-06-17
Supplement: MOESM2 [file 11901238]

## Sheet: MRIO_Japan (Fukushima-Chiba)
2005 MRIO of Japan (47 regions)				7	7	7	7	7	7	7	7	7	7	7	7	7	7	7	7	7	7	7	7	7	7	7	7	7	7	7	7	7	7	7	7	7	7	7	7	7	7	7	7	7	7	7	7	7	7
Part 2				Fukushima	Fukushima	Fukushima	Fukushima	Fukushima	Fukushima	Fukushima	Fukushima	Fukushima	Fukushima	Fukushima	Fukushima	Fukushima	Fukushima	Fukushima	Fukushima	Fukushima	Fukushima	Fukushima	Fukushima	Fukushima	Fukushima	Fukushima	Fukushima	Fukushima	Fukushima	Fukushima	Fukushima	Fukushima	Fukushima	Fukushima	Fukushima	Fukushima	Fukushima	Fukushima	Fukushima	Fukushima	Fukushima	Fukushima	Fukushima	Fukushima	Fukushima	Fukushima	Fukushima	Fukushima	Fukushima
				1	2	3	4	5	6	7	8	9	10	11	12	13	14	15	16	17	18	19	20	21	22	23	24	25	26	27	28	29	30	31	32	33	34	35	36	37	38	39	40	41	42	43	44	45	46
			Million yen	Agriculture, forestry and fishery	Metallic ores	Non-metallic ores	Coal mining, crude petroleum and natural gas	Food and Tobacco	Beverage	Textile products	Wearing aparel and other textile products	Timber and wooden products	Furniture and fixtures	Pulp, paper, paperboard, building paper	Paper products	Publishing, printing	Chemical fertilizer	Basic inorganic chemical products	Basic organic chemical products	Organic chemical products	Synthetic resins	Synthetic fibers	Final chemical products	Medicaments	Petroleum refinery products	Coal products	Plastic products	Rubber products	Glass and glass products	Cement and cement products	Pottery, china and earthenware	Other ceramic, stone and clay products	Pig iron and crude steel	steel products	Cast and forged steel products	Other iron or steel products	Non-ferrous metals	Non-ferrous metal products	Metal products for construction and architecture	Other metal products	General industrial machinery	Special industrial machinery	Other general machines	Machinery for office and service industry	Industrial electric equipment	Applied electric equipment and electric mesuring instruments	Other electric equipment	Household electric and electric applications	Communication equipment
1	Hokkaido	1	Agriculture, forestry and fishery	1679.92	0	0.0399726	0.756761	4731.78	123.225	0.369624	0.835225	529.68	0.0358235	0	0.0652054	0	0.4642	3.51165	0	6.03909	0	0	4.9409	12.2574	0	0.557553	0	327.874	0	0	0	0.684053	0	0	0	0	0	0.122651	0	0	0	0	0	0	0	0	0	0	0
1	Hokkaido	2	Metallic ores	0	0	0	0	0	0	0	0	0	0	0	0	0	0.00258737	1.98487	0	0	0.00729743	0	0	0	0	0	0	0	0.00381036	0	0.00188232	0.0673595	0.001107	0	0	0	65.4764	0	0	0	0	0	0	0	0	0	0	0	0
1	Hokkaido	3	Non-metallic ores	0.175196	0	0.425116	0	0	0	0	0	0	0	3.22145	0.0165112	0	3.82018	25.2693	0	1.95506	0	0	1.3716	0.25457	0	8.44924	0	1.24167	93.0338	60.2955	4.4847	43.4961	-0.0167636	0	0.626061	0	0.36575	0.0621148	0.0378523	0.0752003	0	0	0.286191	0	0	0	0	0	0
1	Hokkaido	4	Coal mining, crude petroleum and natural gas	0	0	0	0	0	0	0	0	0	0	0	0	0	0	0	0	0	0	0	0	0	0	0	0	0	0	0	0	0	0	0	0	0	0	0	0	0	0	0	0	0	0	0	0	0	0
1	Hokkaido	5	Food and Tobacco	716.669	0	0	0	1980.27	162.993	0	7.98706	0.14928	0	9.58067	0.0255862	0	0.212507	1.05996	0	6.17921	0.0526905	0	8.44444	34.806	0	0	0.450845	0	0.923959	0	0.11779	2.38593	0	0	0.0293987	0	0	0	0	0	0	0	0	0	0	0	0	0	0
1	Hokkaido	6	Beverage	1.57122	0	0	0	2.54127	3.90149	0	0	0	0	0	0	0	0	0	0	0.0171693	0	0	0	0.078161	0	0	0	0	0	0	0	0	0	0	0	0	0	0	0	0	0	0	0	0	0	0	0	0	0
1	Hokkaido	7	Textile products	0.0380617	0	0	0	0.00445808	9.43033e-05	0.0693489	1.77518	0.0016853	0.0461149	0.0289657	0.133128	0.00183018	0.00292327	0	0	0	0	0.000787409	0.000190743	0	0	0	0.0121522	0.192034	0.00336485	0.000102324	0	0.006734	0	0	0.000195233	0	0	0.00585947	0.000486916	0.00599754	0.000863904	0.00181324	9.81716e-05	0	0	0	0.0810287	0.0150004	0.0394829
1	Hokkaido	8	Wearing aparel and other textile products	2.01593	0	0.152706	0.0456477	1.15648	0.122452	0.0311753	1.73044	0.228385	0.271755	0.259488	0.20106	0.0268312	0.118224	0.0926652	0	0.077181	0.0128246	0	0.151803	0.265891	0	0.163846	0.123565	0.256144	0.588643	0.124295	0.0491475	0.27377	0	0.00423244	0.192176	0.0211478	0.0443411	0.232047	0.0917791	0.431528	0.227169	0.145905	0.257006	0.031861	0.283122	0.142935	0.316829	0.0971039	1.17114
1	Hokkaido	9	Timber and wooden products	8.77207	0	0.149302	0.104137	4.82159	0.93268	0	0.335074	111.816	99.3901	0.0239991	2.71558	0.0262332	0.0144486	0	0	0.0142764	0.0250775	0	0.314415	0	0	0	1.03501	0.0392473	3.68822	0.205335	2.04622	2.34209	0	0	2.35066	0	0	4.94763	0.697928	3.4248	0.275175	0.369336	0.140716	0.346325	0.364129	0.125416	1.47721	0.117278	3.16257
1	Hokkaido	10	Furniture and fixtures	0.175771	0	0.280278	0.291417	4.94291	0.242718	0.0307317	0.99021	0.16237	27.5102	0.499493	0.546657	0.171291	0.0825506	0.835269	0	0.268004	0.133043	0	0.948395	1.92143	0	0.013075	2.56522	0.88626	0.127359	0.287303	0.308857	0.556105	0	0.0472852	0.993562	0	0.0550424	0.523475	0.125322	0.656389	0.482884	0.401934	0.321585	0.0837538	0.435187	0.532294	3.13037	0.361617	36.7023
1	Hokkaido	11	Pulp, paper, paperboard, building paper	4.16929	0	0	0	95.0621	0.628066	0.218687	3.15408	18.4043	51.2139	2018.83	1245.37	367.121	0	34.0721	0	0	16.313	0	70.2668	14.7634	0	0	61.8735	22.4911	84.7793	0	6.8377	41.6335	0	0	0	0.420316	0	9.04656	0.324289	3.14076	1.83797	0.0794491	7.19211	0	50.8327	1.0198	68.5589	3.70854	71.912
1	Hokkaido	12	Paper products	5.72931	0	0	0	9.06279	3.04766	0.0186007	0.371017	0.0210593	0.83023	0.0948467	1.37401	0.0647975	0.144184	0.384507	0	0.086043	0.0235383	0.0111513	1.664	3.07651	0	0.00158276	0.798139	0.0840174	2.47235	0.013042	0.402958	0.290308	0	0	0	0.0343205	0	0.113157	0.00137914	0.676757	0.140018	0.0243275	0.130689	0.0532276	0.177314	0.0879792	1.03371	0.198273	1.92036
1	Hokkaido	13	Publishing, printing	0.0553634	0	0.0150194	0.0224484	11.0108	0.586972	0.0399815	0.964732	0.0857671	0.832299	0.0804746	2.73588	5.11962	0.0484497	0.347992	0	0.035904	0.0483522	0.0147179	2.38136	0.854774	0	0.00805753	0.198927	0.223729	1.3081	0.0516402	0.0305476	0.142793	0.00207291	0.00971325	0.377695	0.00242666	0.0989339	0.199701	0.0678692	0.778784	0.329875	0.493095	0.261878	0.52904	0.17225	0.254433	0.779369	0.485024	10.1454
1	Hokkaido	14	Chemical fertilizer	463.806	0	0	0	0.117866	0.383963	0	0.0468868	0	0	0	0.0494157	0	165.694	39.0712	0	20.1607	3.10378	0	12.3705	5.09882	0	0	0	0.159264	1.15128	0	0	0.518407	0	0.117546	0	0	1.77879	0.0619669	0	0	0	0.0555092	0	0	0	0	4.06962	0	0
1	Hokkaido	15	Basic inorganic chemical products	0.0953106	0	0.00135776	0	1.41052	0.281499	0.166641	0.249028	0.00129224	0.0243365	0.548896	0.0819495	0.00119283	1.70159	17.571	0	3.60408	0.360329	0.00684263	6.01698	3.3111	0	0.00582725	1.19722	9.15372	3.48438	0.0266761	0.130004	0.121341	0.0269845	0.0131713	0.0941607	0.00526492	0.344971	0.127761	0.264035	0.235796	0.0575566	0.0510034	0.122849	0.00933183	0.0934289	0.0729947	3.94633	0.0165906	1.21446
1	Hokkaido	16	Basic organic chemical products	0	0	0	0	0.263203	0	0	0	0	0	0.1171	0.0169767	0.128001	4.89473	30.7238	0	90.1793	12.3411	0.104896	14.0074	0.865777	0	0	0.0527894	0.41948	1.28544	0	0	0.158309	0	0	0	0	0	0	0	0	0.0767246	0	0	0	0	0	0	0	0
1	Hokkaido	17	Organic chemical products	0.000204734	0	4.25819e-05	0	0.050781	0.00682363	0.004904	6.5907e-05	0.00231003	0.00358722	0.033094	0.0222972	0.000710776	0.00337909	0.23436	0	0.401755	0.500693	0.0268604	0.362591	0.240514	0	0.00054826	0.225389	0.927908	0.0173564	0.000250983	0.000199861	0.0614541	0	0	0	0	0.00427948	0.0106703	0.000159243	0.00138409	0.000196204	0.000195068	0.00128425	0.000987738	0.00207703	0.000536542	0.044218	0.00386516	0.0130368
1	Hokkaido	18	Synthetic resins	0	0	0	0	0	0	7.40304e-05	0	0.000335261	0.0167319	0.0597374	0.0163769	0.00162472	0	0	0	0	0.000961472	0.00806269	0.164331	0	0	0	2.68046	0.00146616	0.122078	0	0	0.013145	0	0	0	0	0	0.0367495	8.23341e-05	0.00310786	0	0	0.00232402	0.000907904	0.0167989	0	0.0747421	0.0119906	0.131789
1	Hokkaido	19	Synthetic fibers	0	0	0	0	0	0	0	0	0	0	0	0	0	0	0	0	0	0	0	0	0	0	0	0	0	0	0	0	0	0	0	0	0	0	0	0	0	0	0	0	0	0	0	0	0	0
1	Hokkaido	20	Final chemical products	28.201	0	0.368464	0.0357398	3.08614	0.185984	0.361822	0.840306	3.46337	4.29575	5.33047	3.25795	3.85582	0.24929	0.566625	0	2.37899	0.649012	0.0684707	32.5635	4.20774	0	0.937631	4.23421	2.40004	1.47469	0.813614	0.00918272	2.06154	0	0.00632632	0.877027	0.012644	0.0220925	0.66701	1.05784	3.15239	0.649058	0.973926	0.534739	0.890835	0.931582	0.402644	4.44565	0.204908	4.23929
1	Hokkaido	21	Medicaments	2.53421	0	0	0	0.258585	0	0	0.0152391	0	0	0	0	0	0	0	0	0	0	0	0.0781295	17.2198	0	0	0	0	0	0	0	0	0	0	0	0	0	0	0	0	0	0	0	0	0	0	0	0	0
1	Hokkaido	22	Petroleum refinery products	216.026	0	8.89754	0.933231	137.524	30.9112	9.34048	4.57947	16.288	4.23499	23.3007	9.82656	6.65731	29.828	124.982	0	13.5963	3.36078	0.643643	37.3421	32.2038	0.0471999	78.1546	35.3787	23.6502	116.491	17.2302	6.15429	48.0834	0.282028	1.07375	20.6666	1.32063	50.3804	14.3689	7.04485	38.9828	9.96486	16.0309	11.355	2.56021	6.89712	0.858268	19.5148	1.59772	9.2368
1	Hokkaido	23	Coal products	0	0	0	0	0	0	0	0	0	0	0	0	0	0	0	0	0	0	0	0	0	0	0	0	0	0	0	0	0	0	0	0	0	0	0	0	0	0	0	0	0	0	0	0	0	0
1	Hokkaido	24	Plastic products	4.7005	0	0.00487602	0.0218635	13.6503	7.78278	0.0143462	1.38487	0.66362	4.06181	1.76154	8.04946	3.82535	0.363343	2.13947	0	0.0163187	0	0.0204778	4.98017	8.41937	0	0	107.229	7.30819	2.30481	0.0431098	0.0343289	0.266555	0	0	0.0159937	0	0.132146	2.11205	0.145878	0.722267	0.649301	1.02751	1.07996	1.28395	3.15987	0.696308	34.7022	1.93636	36.1583
1	Hokkaido	25	Rubber products	1.17504	0	0.160618	0.091005	0.336979	0.0256616	0.00264746	0.806732	0.0509556	0.268135	0.194901	0.400719	0.0857711	0.0548603	0.0516869	0	0.0692635	0.0290941	0	0.233571	0.450882	0	0.0337913	0.364762	12.8791	0.00299227	0.0711575	0	0.308401	0.00782393	0.0672127	0.206603	0.00610608	0.0213379	0.0450961	0.35333	0.336352	1.98806	5.18519	0.774714	0.730536	1.28107	0.444448	1.53514	0.48103	6.56308
1	Hokkaido	26	Glass and glass products	0.0775239	0	0	0	1.28522	9.21691	0.00753014	0.142111	0.0170509	6.29791	0	0	0	0	0.908018	0	0.102785	0	0	1.24667	5.03877	0	0	3.93791	0.208001	10.2982	0.052798	0	0.332137	0	0	0	0	0	0.618426	0.0795603	0.544893	0.119696	0.0984852	0	0.173155	0.0390121	0.221977	12.7617	0.242365	1.15998
1	Hokkaido	27	Cement and cement products	0.0130436	0	0	0.0540638	0	0	0	0	0	0	0	0	0	0	0	0	0	0	0	0.0124198	0	0	0.0291081	0	0	0	68.8111	0	0.580325	0	0	0	0	0	0	0	0.239348	0	0	0	0	0	0	0.0246254	0	0
1	Hokkaido	28	Pottery, china and earthenware	0	0	0	0	0.000846153	0.000180012	0	0	0	0.00358613	0	0	0	0	0.00067183	0	0	0	0	0.000136539	0	0	0	0.000294163	0	2.36141e-05	0.000244153	0.00191312	0	0	0	2.32921e-05	0	0	0	0	0.000300061	4.58077e-05	0.000113856	0	2.13525e-05	0.00387506	6.2633e-05	0.00135361	4.33844e-05	0.0044547
1	Hokkaido	29	Other ceramic, stone and clay products	0.164244	0	0	0.0013681	0.00560931	0.000497223	0	0	0.00182945	0.01009	0.0403881	0.000223973	0.000241245	0.00265745	0.48593	0	0.00498895	0.00830223	0	0.0216228	0.0313446	0	0.0412489	0.018572	0.00529357	0.500414	0.294844	0.047688	0.621088	0.0247862	0.00106554	0.255803	0	0.231633	0.0499931	0.0338885	0.113484	0.294305	0.0495635	0.0794545	0.00188733	0.0973484	0.0177616	0.408288	0.00742977	0.190044
1	Hokkaido	30	Pig iron and crude steel	0	0	0	0	0	0	0	0	0	0	0	0	0	0	0.356579	0	0	0	0	0	0	0	0	0	0	0	0	0	-0.00949078	9.48178	0.203363	54.9349	0.677413	0	0	-0.214659	-2.42896	-0.570365	-1.36278	-0.141129	-0.0343053	-0.278245	0	-1.71261	0	-1.07869
1	Hokkaido	31	steel products	0.190511	0	0.167639	0.911122	0	0	0	0.0353819	0.377115	16.9633	0	0	0	0	0	0	0	0	0	0	0	0	0	4.57378	5.06108	0	17.3065	0	1.65174	0	86.7663	85.7793	141.532	0.326974	1.02876	97.1863	277.728	63.3251	56.5495	67.9965	2.12105	41.0044	2.61156	47.7116	8.26006	52.3173
1	Hokkaido	32	Cast and forged steel products	0	0	0	0.0495533	0	0	0	0	0	1.51535	0	0	0	0	0	0	0	0	0	0	0	0	0	0	0	0	0.146561	0.840302	0.756492	0	0	15.7063	0	0	1.11902	42.5427	53.4362	109.257	125.802	115.022	5.12701	51.5041	5.13834	19.5915	1.04172	11.046
1	Hokkaido	33	Other iron or steel products	0	0	0	0	0	0	0	0	0	0	0	0	0	0	0	0	0	0	0	0	0	0	0	0	0	0	0	0	0	0	0	0	0	0	0	0	0	0	0	0	0	0	0	0	0	0
1	Hokkaido	34	Non-ferrous metals	0	0	0	0	0	0	0	0	0.000116855	0.00330109	0.00157888	0	-0.00172586	0	0.536834	0	0.00363952	0	0	0.10365	0	0	0	0.00477478	-0.000107585	0.0544785	0	0.0103731	0.0524121	0.00406696	0.005598	0.0119668	-0.000357076	1.39589	6.92744	0.00275497	0.379592	-0.00282868	0.00494966	0.00578598	-0.000105483	0.0396767	0.0021659	2.57572	0.00117878	0.0358003
1	Hokkaido	35	Non-ferrous metal products	0	0	0	0.027061	3.10549	0.210362	0	0	0.114878	1.69563	0	0.135367	0.265102	0	0.594286	0	0	0	0	0.549821	0.38239	0	0	0.946449	0.568485	0.237965	0	0.0198285	0.390168	0	0	0.0197957	0	0.32712	14.5706	7.76111	16.2567	6.02324	3.52777	7.18403	0.375907	11.6411	2.06334	50.1747	2.29133	33.3338
1	Hokkaido	36	Metal products for construction and architecture	0.0653819	0	0	0.0564578	0	0	0	0	0.0431409	0.853092	0	0	0	0	0	0	0	0	0	0	0	0	0	0	0	0	0.211511	0	0	0	0	0.0318601	0	0	0.0231808	7.88241	2.18901	0.511707	0	0.662185	0	0	0	0	0	0.174929
1	Hokkaido	37	Other metal products	1.27781	0	1.03567	0.682681	4.62478	23.6026	0	0.737369	2.56885	9.15313	0.394417	0.194935	0.0643901	0	4.72536	0	2.07508	0.262271	0	2.9119	4.85813	0	0.105993	1.15035	10.5269	0.893173	2.21009	0.394861	1.59056	0	0	2.10841	0.00308919	0.226701	0.765932	6.34884	32.6248	11.2532	9.69318	6.73662	2.25862	6.09536	2.25659	10.4306	2.03868	37.612
1	Hokkaido	38	General industrial machinery	0.0195052	0	0.110113	0.0230988	0	0	0	0	0.00275788	0.0727143	0	0	0	0	0	0	0	0	0	0	0	0	0.00310912	2.56488	0	4.27568	0.00284659	0.0462422	0.247944	0	0	0.401914	0.0224727	0.0229051	0.0503839	0.0866924	0.452104	41.7351	8.17709	1.52667	0.913642	0.956591	0.496563	0.407696	0.918063	0.638656
1	Hokkaido	39	Special industrial machinery	0	0	0	0	0	0	0	0	0	0	0	0	0	0	0	0	0	0	0	0	0	0	0	0	0	0.104434	0	0	0	0	0	0	0	0	0	0	0	0.848932	87.8113	0.00493313	0.0134903	0.00911816	0.0131903	0.327827	0.0319782	0
1	Hokkaido	40	Other general machines	0	0	0.122548	0.0169597	0	0	0	0	0.019439	1.61996	0	0	0	0	0	0	0	0	0	0.0342853	0	0	0	0.218717	0	0.0194059	0.00334405	0.146993	0.281565	0	0	0.411538	0	0	0.104451	0.143216	0.420464	4.95651	5.63268	15.4001	0.283681	4.23116	0.646251	0.423325	0.454576	3.72798
1	Hokkaido	41	Machinery for office and service industry	0	0	0	0	0	0	0	0	0	0	0	0	0	0	0	0	0	0	0	0	0	0	0	0	0	0	0	0	0	0	0	0	0	0	0	0	0	0	0	0	0.172244	0	0	0	0	0
1	Hokkaido	42	Industrial electric equipment	0.145831	0	0.00758272	0	0	0	0	0	0.00721677	0.0543651	0	0	0	0	0	0	0	0	0	0	0	0	0	0.00641047	0	0	0	0	0	0	0	0	0	0	0.00775552	0.389908	0.0492941	9.52433	14.3115	0.293012	2.29309	51.4707	4.65618	3.31757	3.02448	33.8537
1	Hokkaido	43	Applied electric equipment and electric mesuring instruments	0	0	0	0	0	0	0	0	0	0	0	0	0	0	0	0	0	0	0	0	0	0	0	0	0	0	0	0	0	0	0	0	0	0	0	0	0	0.00158388	0.00811914	0.000490424	0.000826352	0.00232113	0.025299	0	0	0.000838399
1	Hokkaido	44	Other electric equipment	0.284617	0	0.00704719	0	0.0959688	0	0	0	0	0.258944	0	0	0	0	0.0204101	0	0	0	0	0.096787	0.00681699	0	0	0.0119155	0	0	0	0	0	0	0	0	0	0	0.0144156	0	0.412315	0.201322	0.942672	0.259034	0.454078	2.2282	1.47994	65.0237	1.41466	24.1561
1	Hokkaido	45	Household electric and electric applications	0	0	0	0	0	0	0	0	0	0	0	0	0	0	0	0	0	0	0	0	0	0	0	0.000348072	0	0	0	0	0	0	0	0	0	0	0	0	0	0	0	0	0	0	0	0	0.663714	0
1	Hokkaido	46	Communication equipment	0.00682493	0	0	0	0	0.0257028	0	0.00549263	0	0.00636075	0.00570429	0	0.00623531	0	0.00685189	0	0	0	0	0	0.2197	0	0	0.00600023	0.0373144	0.0134868	0.00697222	0	0	0	0	0.00665147	0	0.0320583	0.00725921	0.0132711	0.0131827	0.209299	0.0650272	0.00668928	0	0	0.125202	0.0515397	0.00619459	75.7183
1	Hokkaido	47	Electric computing equipment and accessory equipment	0	0	0	0	0	0	0	0	0	0	0	0	0	0	0	0	0	0	0	0	0	0	0	0	0	0	0	0	0	0	0	0	0	0	0	0	0	0	0.00433958	0	0	0	0	0	0	0.000791733
1	Hokkaido	48	Semiconductor devices and integrated circuits	0	0	0	0	0	0	0	0	0	0	0	0	0	0	0	0	0	0	0	0	0	0	0	0	0	0	0	0	0	0	0	0	0	0	0	0	0.155823	0.0727636	0.771651	0.269765	3.36914	4.36722	17.0045	0.630116	3.94822	128.18
1	Hokkaido	49	Other electrical equipment	0	0	0	0	0.0178968	0.00555246	0	0	0	0	0	0.0100044	0.290949	0	0	0	0	0	0	0	0.0118652	0	0	0.00518481	0	0	0	0	0	0	0	0	0	0	0.150545	0	1.08217	2.19852	3.00617	0.358374	9.81073	10.3527	54.9023	1.2637	10.1595	454.49
1	Hokkaido	50	Passenger motor cars	0	0	0	0	0	0	0	0	0	0	0	0	0	0	0	0	0	0	0	0	0	0	0	0	0	0	0	0	0	0	0	0	0	0	0	0	0	0	0	0	0	0	0	0	0	0
1	Hokkaido	51	Other cars	0	0	0	0	0	0	0	0	0	0	0	0	0	0	0	0	0	0	0	0	0	0	0	0	0	0	0	0	0	0	0	0	0	0	0	0	0	0	0	0	0	0	0	0	0	0
1	Hokkaido	52	Motor vheicle parts and accessories	0	0	0	0	0	0	0	0	0	0	0	0	0	0	0	0	0	0	0	0	0	0	0	0	0	0	0	0	0	0	0	0	0	0	0	0	0	0	0.535552	0	0	0	0	0	0	0
1	Hokkaido	53	Other transportation equipment	2.97995	0	0.002624	0	0	0	0	0	0	0	0	0	0	0	0	0	0	0	0	0	0	0	0	0	0	0	0	0	0	0	0	0	0	0	0	0	0	0	0	0	0	0	0	0	0	0
1	Hokkaido	54	Precision instruments	0.0382921	0	0	0.00110219	0.00860772	0	0	0.00085603	0.00105276	0.000991327	0.0115572	0.0018044	0	0	0.00533936	0	0	0	0	0.00101279	0.00642007	0	0	0.0187028	0.00193849	0	0.00108663	0.00311506	0.00105164	0	0	0.00103664	0	0	0	0.00310247	0.00205454	0.234452	0.831031	0.00417012	0.0475155	0.136814	0.0576091	0.00301218	0.00193086	2.41801
1	Hokkaido	55	Miscellaneous manufacturing products	0.184991	0	0.0700406	0.0130275	0.139893	0.188543	0	1.45193	0.116434	0.631889	0.0135101	0.00914032	0.0024613	0.00180751	0.000901562	0	0.00982275	0	0	0.0153911	0.000903369	0	0.00601202	0.0307906	0.00409148	0.149065	0.00366958	0.0745146	0.120749	0	0	0.212672	0	0.00105455	0.112709	0.0227006	0.0312222	0.307235	0.0145455	0.005281	0	0.0130149	0.0274565	0.0211923	0.00326031	0.351585
1	Hokkaido	56	Reuse and recycling	1.35279	0	0	0	0.517783	33.9757	0	0	0	0	22.705	0	0	10.0452	7.04761	0	1.5997	0	0	0	0	0	0	72.9666	0.499743	14.9558	3.54834	1.39198	2.06045	5.2581	0.073768	41.227	1.40064	59.7224	100.215	0	0.0706213	0	0	0	0	0	0	0.414155	0	0
1	Hokkaido	57	Building construction and repair of construction	0	0	0	0	0	0	0	0	0	0	0	0	0	0	0	0	0	0	0	0	0	0	0	0	0	0	0	0	0	0	0	0	0	0	0	0	0	0	0	0	0	0	0	0	0	0
1	Hokkaido	58	Public construction	0	0	0	0	0	0	0	0	0	0	0	0	0	0	0	0	0	0	0	0	0	0	0	0	0	0	0	0	0	0	0	0	0	0	0	0	0	0	0	0	0	0	0	0	0	0
1	Hokkaido	59	Other civil enginnering and construction	0	0	0	0	0	0	0	0	0	0	0	0	0	0	0	0	0	0	0	0	0	0	0	0	0	0	0	0	0	0	0	0	0	0	0	0	0	0	0	0	0	0	0	0	0	0
1	Hokkaido	60	Electricity	0.185494	0	0.0285718	0.0460779	0.365155	0.080668	0.0122868	0.0481209	0.0786709	0.0412954	0.375711	0.0410176	0.0429476	0.0406762	0.451217	0	0.142683	0.0225389	0.0127623	0.106759	0.0611881	0	0.0116068	0.336142	0.205785	0.190026	0.0367476	0.00906946	0.137233	0.0179161	0.0101735	0.429739	0.0145694	0.349586	0.186064	0.0359768	0.328997	0.0824146	0.0757335	0.0824203	0.0251851	0.0468246	0.0136652	0.248856	0.0139101	0.135119
1	Hokkaido	61	Gas supply and heat supply	0.00100686	0	0.000349022	0.000695545	0.238328	0.130503	0.00733496	0.00405155	0.00166089	0.00594308	0.0244045	0.0142336	0.000306625	0.0449226	0.0542482	0	0.0230279	0.0123109	0.000879472	0.0389872	0.0590836	0	0.00149794	0.0746514	0.0464856	0.421478	0.00411436	0.018675	0.0248868	0.00173413	0.0104959	0.142938	0.000676692	0.00906478	0.122443	0.0202311	0.103723	0.0154386	0.0175876	0.0101974	0.00299851	0.0215845	0.00586368	0.236975	0.000609245	0.0766249
1	Hokkaido	62	Water supply and waste management services	0.000874492	0	0.000268493	0.000159656	0.00617114	0.00270133	0.000247546	0.000187675	0.000284386	0.000256148	0.00427752	0.000459173	0.00022066	0.000708254	0.00368319	0	0.00212013	0.00166206	9.45721e-05	0.00262488	0.00326329	0	3.71717e-05	0.00178659	0.000827218	0.00120144	0.00135281	7.31724e-05	0.00138336	3.58608e-05	0.000142832	0.000669638	9.23575e-05	0.0014328	0.00105415	0.000307701	0.00114619	0.00117328	0.00158706	0.000542837	0.000100452	0.000441324	0.000167335	0.00228777	0.00010583	0.00186433
1	Hokkaido	63	Commerce	337.892	0	10.0881	3.10279	992.726	87.6982	7.33378	143.554	116.048	138.013	234.57	138.85	60.9986	16.1384	108.148	0	96.2171	29.7825	1.92381	138.363	120.986	0	18.3622	408.412	228.499	103.209	53.0645	7.48891	55.8089	1.27866	8.63782	87.2342	40.0412	135.828	116.946	80.5774	206.806	148.603	152.741	77.0821	44.263	109.748	84.7633	336.407	40.9917	887.762
1	Hokkaido	64	Financial and insurance	0.616675	0	0.123392	0.0458245	0.647615	0.117863	0.0311658	0.289322	0.124036	0.156746	0.14091	0.12107	0.0691196	0.0454643	0.197536	0	0.100804	0.0559732	0.00297139	0.299938	0.151392	0	0.0048585	0.137095	0.18512	0.245768	0.167227	0.0179324	0.100495	0.00257794	0.0119425	0.0892486	0.0231828	0.335558	0.289025	0.119595	0.199225	0.148789	0.153502	0.124965	0.0142236	0.0553412	0.0372052	0.313279	0.0209957	0.56975
1	Hokkaido	65	Real estate agencies and rental services	0.00389718	0	0.00428662	0.00730001	0.0271407	0.0106548	0.000655175	0.00952986	0.00393139	0.0133411	0.00983446	0.00966245	0.00732641	0.00211189	0.0137693	0	0.0102845	0.00458183	0.000392783	0.0111323	0.0283476	0	0.00108712	0.0259605	0.0112	0.0191051	0.00995323	0.00102427	0.00526096	0.000129081	0.000680455	0.00861885	0.00098221	0.0102971	0.00645689	0.0134074	0.0233067	0.00976798	0.011211	0.0082271	0.00147309	0.00644921	0.00484476	0.0563845	0.00204072	0.0786695
1	Hokkaido	66	House rent	0	0	0	0	0	0	0	0	0	0	0	0	0	0	0	0	0	0	0	0	0	0	0	0	0	0	0	0	0	0	0	0	0	0	0	0	0	0	0	0	0	0	0	0	0	0
1	Hokkaido	67	Transport	400.337	0	88.714	8.05553	327.214	48.898	2.7576	28.3968	71.7908	39.8572	63.7077	42.9993	23.9687	7.96248	48.7666	0	26.3109	11.1854	0.963614	43.9701	52.159	0.0198743	9.75131	86.4863	42.7705	45.4059	104.617	3.02887	43.8158	0.831269	3.92995	41.7965	11.9035	175.841	51.0056	42.4004	89.896	42.19	37.9383	27.5215	8.14674	25.4503	13.4617	103.063	6.44587	152.421
1	Hokkaido	68	Communication	0.911976	0	0.1957	0.498749	1.48994	0.53494	0.0632736	0.89996	0.247147	0.68131	0.532352	0.527968	0.479414	0.0874098	0.926478	0	0.237511	0.116944	0.0126443	0.665051	10.35	0	0.0807604	1.53992	2.15999	0.736601	0.384494	0.0459266	0.400738	0	0.0511117	0.596059	0.0291868	1.85715	0.973856	1.52705	1.57629	1.9838	1.23787	0.993167	0.213396	0.753957	0.629113	2.41863	0.213506	4.87997
1	Hokkaido	69	Broadcasting	0	0	0	0	0	0	0	0	0	0	0	0	0	0	0	0	0	0	0	0	0	0	0	0	0	0	0	0	0	0	0	0	0	0	0	0	0	0	0	0	0	0	0	0	0	0
1	Hokkaido	70	Information services	0.82391	0	0.0257558	0.0393509	1.81385	0.775715	0.0129907	0.190019	0.1912	0.583215	0.396063	0.281496	0.199119	0.154536	0.31661	0	0.387479	0.197557	0.00865334	0.462212	2.85686	0	0.0276348	1.27451	0.877152	0.582411	0.301929	0.0676966	0.455452	0.0127969	0.0516357	0.376543	0.104866	0.794959	0.746379	0.374037	1.60897	0.96997	1.63453	0.564789	0.166693	1.18601	1.46399	3.77024	0.07643	6.62487
1	Hokkaido	71	﻿Internet based services	0.00508096	0	0.00176128	0.00263247	0.048827	0.024716	0.00148059	0.0258976	0.0100577	0.023677	0.00920113	0.0100558	0.0177943	0.00170447	0.0212543	0	0.00673661	0.00221875	0	0.0153201	0.247896	0	0.000944887	0.0677494	0.0362676	0.0209178	0.0103812	0.000826671	0.00837247	0	0.000854287	0.0206326	0.000853705	0.0536995	0.027922	0.0370498	0.0515243	0.0422004	0.0355013	0.0165999	0.00378288	0.0276142	0.0229324	0.0943257	0.00614892	0.207687
1	Hokkaido	72	Image information production and distribution industry	0.194065	0	0.0908164	0.0837883	0.713252	0.0669947	0.0678604	0.723639	0.0960373	0.385847	0.278443	0.359388	0.106379	0.563129	0.470842	0	0.0997043	0.0536713	0.0056504	0.344928	1.52273	0	0.0324806	0.702364	1.11702	0.73503	0.403115	0.0757783	0.425311	0.00278535	0.0130516	0.182828	0.0260855	0.307654	0.165131	0.28302	1.3557	0.45875	0.511564	0.218739	0.124257	0.383798	0.350356	2.00592	0.105685	3.97202
1	Hokkaido	73	Public administration	0	0	0	0	0	0	0	0	0	0	0	0	0	0	0	0	0	0	0	0	0	0	0	0	0	0	0	0	0	0	0	0	0	0	0	0	0	0	0	0	0	0	0	0	0	0
1	Hokkaido	74	Education and Research	0.172567	0	0.0198239	0.144508	4.16208	0.83598	0.0280666	0.305214	0.0486574	0.570387	0.355549	0.353162	0.0274986	0.732039	3.92832	0	1.60625	0.80176	0.0701089	4.92176	21.64	0	0.0503765	5.58699	4.84635	5.08248	0.969604	0.234081	1.54942	0.02592	0.116396	0.552457	0.00202289	1.24769	2.04144	0.824264	1.06877	2.04222	3.00449	0.711951	0.831834	4.33677	4.256	19.4813	1.40329	27.9106
1	Hokkaido	75	Medical service, health and social security and nursing care	0.00374769	0	0.00202662	0.00225237	0.0318445	0.0105148	0.000327622	0.00778154	0.00207718	0.00265453	0.00657788	0.0033695	0.00191739	0.00135779	0.00790123	0	0.00350307	0.00137469	0.000261883	0.00792193	0.0311405	0	0.000585433	0.0117955	0.015026	0.00511004	0.00436457	0.000439019	0.00237139	6.45472e-05	0.000378071	0.0061361	0.001209	0.0042249	0.00247142	0.00553843	0.0154188	0.0152282	0.00892689	0.0141051	0.0023438	0.00509203	0.00222621	0.0140092	0.000952437	0.0317519
1	Hokkaido	76	Advertising and survery	0.526301	0	0.364878	0.193514	63.8289	20.6731	0.0890499	2.03127	0.644128	4.00316	6.58879	9.34093	0.372257	0.598007	3.318	0	0.483957	0.434938	0.0593179	16.2409	36.1612	0	0.0189434	7.54258	7.87955	1.18541	0.85563	0.314894	1.09105	0.0194937	0.142725	1.03688	0.125513	0.910445	1.07143	1.47457	2.9295	3.17267	3.18127	1.96907	1.08705	2.41952	2.36304	11.2342	1.24303	27.057
1	Hokkaido	77	Giids rental and leasing services	3.37018	0	0.455552	0.506934	6.03876	0.963351	0.178897	0.977862	0.819662	1.48406	1.10106	0.824484	0.762452	0.0836665	1.6468	0	0.273443	0.360242	0.0223437	0.809857	0.897424	0	0.613657	5.20903	2.99233	2.54326	3.37105	0.206013	2.3552	0.03855	0.11935	1.66408	0.254655	0.728443	1.7583	1.06942	7.29406	5.37477	5.33147	2.91772	0.671334	5.35241	1.6871	9.26625	0.560124	25.8786
1	Hokkaido	78	Other business services	5.0609	0	0.551656	0.498611	9.70218	1.41407	0.0771008	2.02499	1.14249	1.32725	1.04501	1.19032	1.57243	0.343291	3.36729	0	0.932471	0.365878	0.0317213	1.55482	3.40535	0	0.227209	6.2852	5.46493	5.05043	2.68443	0.10129	1.79398	0.0178708	0.0915899	2.80237	0.108525	2.59075	2.26105	2.27361	3.95576	3.65307	2.66308	1.32588	0.52956	2.10177	1.7471	6.44725	0.602732	11.6873
1	Hokkaido	79	Personal services	0.196953	0	0.00512046	0	0.154403	0.0394044	0	0.0317012	0.0243667	0.0206503	0.0308651	0.0167055	0.0134954	0.0049553	0.0469612	0	0.0122405	0.0107507	0	0.0234417	0.0470553	0	0	0.0714262	0.0493541	0.0267577	0.0226355	0.00240332	0.00486814	0	0	0.0167954	0.00496383	0.0636031	0.0523715	0.0167553	0.064197	0.0377496	0.0351853	0.0217169	0.0109977	0.0401404	0.0193557	0.134789	0.00446908	0.197605
1	Hokkaido	80	Activities not elsewhere classified	0	0	0	0	0	0	0	0	0	0	0	0	0	0	0	0	0	0	0	0	0	0	0	0	0	0	0	0	0	0	0	0	0	0	0	0	0	0	0	0	0	0	0	0	0	0
2	Aomori	1	Agriculture, forestry and fishery	526.25	0	0.0125218	0.237062	1482.27	38.6012	0.115788	0.261642	165.927	0.011222	0	0.0204262	0	0.145415	1.10006	0	1.8918	0	0	1.54778	3.83974	0	0.174659	0	102.709	0	0	0	0.214286	0	0	0	0	0	0.0384214	0	0	0	0	0	0	0	0	0	0	0
2	Aomori	2	Metallic ores	0	0	0	0	0	0	0	0	0	0	0	0	0	0	0	0	0	0	0	0	0	0	0	0	0	0	0	0	0	0	0	0	0	0	0	0	0	0	0	0	0	0	0	0	0	0
2	Aomori	3	Non-metallic ores	0.128097	0	0.310829	0	0	0	0	0	0	0	2.35541	0.0120724	0	2.79318	18.476	0	1.42947	0	0	1.00287	0.186133	0	6.17778	0	0.907868	68.023	44.0859	3.27905	31.8028	-0.0122569	0	0.457753	0	0.267423	0.0454161	0.0276762	0.0549838	0	0	0.209252	0	0	0	0	0	0
2	Aomori	4	Coal mining, crude petroleum and natural gas	0	0	0	0	0	0	0	0	0	0	0	0	0	0	0	0	0	0	0	0	0	0	0	0	0	0	0	0	0	0	0	0	0	0	0	0	0	0	0	0	0	0	0	0	0	0
2	Aomori	5	Food and Tobacco	146.04	0	0	0	403.531	33.2139	0	1.62757	0.0304197	0	1.95231	0.00521384	0	0.0433037	0.215994	0	1.25917	0.010737	0	1.72077	7.09261	0	0	0.0918713	0	0.18828	0	0.0240027	0.486195	0	0	0.00599075	0	0	0	0	0	0	0	0	0	0	0	0	0	0
2	Aomori	6	Beverage	0.447964	0	0	0	0.724529	1.11233	0	0	0	0	0	0	0	0	0	0	0.00489506	0	0	0	0.0222841	0	0	0	0	0	0	0	0	0	0	0	0	0	0	0	0	0	0	0	0	0	0	0	0	0
2	Aomori	7	Textile products	0.0114895	0	0	0	0.00134574	2.84669e-05	0.020934	0.535866	0.000508733	0.0139205	0.00874373	0.0401867	0.000552468	0.000882433	0	0	0	0	0.000237691	5.75787e-05	0	0	0	0.00366831	0.0579683	0.00101573	3.08881e-05	0	0.00203276	0	0	5.89342e-05	0	0	0.00176877	0.000146983	0.00181045	0.000260783	0.000547353	2.96346e-05	0	0	0	0.0244597	0.0045281	0.0119185
2	Aomori	8	Wearing aparel and other textile products	5.79196	0	0.438738	0.13115	3.32269	0.351817	0.0895697	4.97174	0.656173	0.780778	0.745534	0.577666	0.0770886	0.339669	0.266236	0	0.221749	0.0368463	0	0.436145	0.763931	0	0.470745	0.355015	0.735926	1.69123	0.357111	0.141206	0.786567	0	0.0121602	0.552141	0.0607597	0.127396	0.666694	0.263691	1.23982	0.652679	0.419201	0.738403	0.0915398	0.813438	0.410667	0.910282	0.278989	3.3648
2	Aomori	9	Timber and wooden products	0.535073	0	0.00910704	0.00635211	0.294104	0.056891	0	0.0204386	6.82048	6.06253	0.00146388	0.165643	0.00160015	0.000881329	0	0	0.000870821	0.00152966	0	0.0191785	0	0	0	0.0631329	0.00239398	0.224971	0.0125249	0.124814	0.142862	0	0	0.143384	0	0	0.301792	0.0425718	0.208904	0.016785	0.0225285	0.00858328	0.0211249	0.0222109	0.00765006	0.0901056	0.00715367	0.192908
2	Aomori	10	Furniture and fixtures	0.0131628	0	0.0209888	0.021823	0.370154	0.0181761	0.00230137	0.0741527	0.0121593	2.06013	0.037405	0.0409369	0.0128273	0.00618187	0.0625498	0	0.0200697	0.00996305	0	0.0710214	0.143888	0	0.000979132	0.192099	0.0663683	0.00953741	0.0215149	0.0231291	0.0416444	0	0.00354099	0.0744037	0	0.0041219	0.0392009	0.00938486	0.0491542	0.0361612	0.0300992	0.0240821	0.00627197	0.0325893	0.0398613	0.234421	0.02708	2.74848
2	Aomori	11	Pulp, paper, paperboard, building paper	1.22407	0	0	0	27.9095	0.184395	0.0642049	0.926013	5.40337	15.036	592.712	365.631	107.784	0	10.0033	0	0	4.78937	0	20.6298	4.33442	0	0	18.1656	6.60322	24.8905	0	2.0075	12.2233	0	0	0	0.123401	0	2.656	0.0952087	0.922102	0.539614	0.0233257	2.11155	0	14.9241	0.299404	20.1284	1.0888	21.1128
2	Aomori	12	Paper products	4.99399	0	0	0	7.89964	2.65651	0.0162134	0.323399	0.0183564	0.723675	0.0826737	1.19767	0.0564812	0.125679	0.335158	0	0.0749999	0.0205173	0.00972008	1.45044	2.68166	0	0.00137962	0.695703	0.0732343	2.15504	0.0113681	0.351241	0.253048	0	0	0	0.0299156	0	0.0986339	0.00120214	0.589899	0.122048	0.0212052	0.113916	0.0463961	0.154557	0.0766876	0.901041	0.172826	1.67389
2	Aomori	13	Publishing, printing	0.0247725	0	0.00672044	0.0100446	4.92678	0.262642	0.0178898	0.431671	0.0383766	0.372414	0.0360085	1.22417	2.29078	0.0216789	0.15571	0	0.0160653	0.0216353	0.00658556	1.06554	0.38247	0	0.00360536	0.08901	0.100108	0.58531	0.0231065	0.0136686	0.0638928	0.000927525	0.00434621	0.169	0.00108581	0.0442681	0.0893567	0.0303682	0.348468	0.147603	0.220636	0.117178	0.23672	0.0770733	0.113846	0.34873	0.217025	4.5396
2	Aomori	14	Chemical fertilizer	37.5402	0	0	0	0.00954005	0.0310778	0	0.003795	0	0	0	0.00399968	0	13.4112	3.16241	0	1.63179	0.251219	0	1.00126	0.412696	0	0	0	0.0128907	0.093184	0	0	0.0419596	0	0.00951413	0	0	0.143974	0.00501557	0	0	0	0.00449289	0	0	0	0	0.329393	0	0
2	Aomori	15	Basic inorganic chemical products	0.0101664	0	0.000144828	0	0.150456	0.0300265	0.017775	0.026563	0.000137838	0.00259589	0.0585488	0.00874127	0.000127235	0.181502	1.87424	0	0.384435	0.038435	0.000729879	0.64181	0.353184	0	0.000621573	0.127703	0.976395	0.371666	0.00284544	0.0138671	0.012943	0.00287834	0.00140493	0.0100438	0.00056159	0.0367968	0.0136278	0.0281637	0.0251516	0.00613935	0.00544035	0.0131038	0.000995393	0.00996573	0.00778608	0.420941	0.00176966	0.129543
2	Aomori	16	Basic organic chemical products	0	0	0	0	0	0	0	0	0	0	0	0	0	0	0	0	0	0	0	0	0	0	0	0	0	0	0	0	0	0	0	0	0	0	0	0	0	0	0	0	0	0	0	0	0	0
2	Aomori	17	Organic chemical products	0.00124442	0	0.000258823	0	0.308659	0.0414756	0.0298076	0.000400598	0.0140409	0.021804	0.201153	0.135528	0.00432027	0.0205389	1.42449	0	2.44196	3.04333	0.163264	2.20391	1.4619	0	0.00333245	1.36997	5.64004	0.105496	0.00152553	0.0012148	0.373532	0	0	0	0	0.0260117	0.0648566	0.000967914	0.00841283	0.00119257	0.00118567	0.007806	0.00600371	0.0126247	0.00326123	0.268767	0.0234934	0.0792406
2	Aomori	18	Synthetic resins	0	0	0	0	0	0	0	0	0	0	0	0	0	0	0	0	0	0	0	0	0	0	0	0	0	0	0	0	0	0	0	0	0	0	0	0	0	0	0	0	0	0	0	0	0	0
2	Aomori	19	Synthetic fibers	0	0	0	0	0	0	0	0	0	0	0	0	0	0	0	0	0	0	0	0	0	0	0	0	0	0	0	0	0	0	0	0	0	0	0	0	0	0	0	0	0	0	0	0	0	0
2	Aomori	20	Final chemical products	0.0112713	0	0.000147267	1.42844e-05	0.00123346	7.43335e-05	0.000144612	0.000335852	0.00138423	0.00171692	0.00213047	0.00130213	0.00154108	9.96356e-05	0.000226467	0	0.00095083	0.000259396	2.73662e-05	0.0130149	0.00168174	0	0.00037475	0.00169232	0.000959241	0.0005894	0.000325183	3.67013e-06	0.000823953	0	2.52849e-06	0.000350528	5.05353e-06	8.82987e-06	0.000266589	0.000422796	0.00125994	0.000259414	0.000389256	0.000213723	0.000356047	0.000372332	0.000160928	0.00177683	8.18971e-05	0.00169435
2	Aomori	21	Medicaments	1.39946	0	0	0	0.142798	0	0	0.00841546	0	0	0	0	0	0	0	0	0	0	0	0.0431452	9.50924	0	0	0	0	0	0	0	0	0	0	0	0	0	0	0	0	0	0	0	0	0	0	0	0	0
2	Aomori	22	Petroleum refinery products	0	0	0	0	0	0	0	0	0	0	0	0	0	0	0	0	0	0	0	0	0	0	0	0	0	0	0	0	0	0	0	0	0	0	0	0	0	0	0	0	0	0	0	0	0	0
2	Aomori	23	Coal products	0	0	3.637e-05	0	0	0	0	0	1.73074e-05	0	0.000116923	0	0	0.00131988	0.00168535	0	0.0178407	0	0	9.99019e-05	0	0	0	9.22421e-05	0	0	0	0	0.00387272	6.02354e-05	0.000970242	0.0102935	1.76287e-05	0.00248471	0.000223193	0.00034003	6.75531e-05	0	4.99834e-05	3.42783e-05	0	4.75187e-05	0	1.65067e-05	0	1.55952e-05
2	Aomori	24	Plastic products	1.79026	0	0.00185711	0.00832708	5.19893	2.9642	0.00546399	0.527449	0.25275	1.54701	0.670912	3.06577	1.45695	0.138385	0.814851	0	0.00621523	0	0.0077993	1.89678	3.20665	0	0	40.8398	2.78344	0.877824	0.016419	0.0130747	0.101522	0	0	0.00609144	0	0.0503298	0.804409	0.05556	0.275087	0.247297	0.391342	0.411322	0.489014	1.20349	0.2652	13.2169	0.737494	13.7715
2	Aomori	25	Rubber products	0.181309	0	0.0247835	0.0140422	0.0519963	0.00395962	0.000408506	0.12448	0.00786249	0.0413735	0.0300734	0.0618314	0.0132346	0.008465	0.00797534	0	0.0106874	0.00448925	0	0.0360403	0.0695715	0	0.00521403	0.0562832	1.98725	0.000461711	0.0109797	0	0.0475866	0.00120724	0.010371	0.0318791	0.000942175	0.00329247	0.00695837	0.0545192	0.0518995	0.306759	0.800079	0.119539	0.112722	0.19767	0.0685789	0.236873	0.0742234	1.01269
2	Aomori	26	Glass and glass products	0.00311718	0	0	0	0.0516776	0.370605	0.000302782	0.0057142	0.000685603	0.253234	0	0	0	0	0.0365108	0	0.00413293	0	0	0.0501277	0.202605	0	0	0.158341	0.00836359	0.414083	0.00212297	0	0.013355	0	0	0	0	0	0.0248665	0.00319906	0.0219098	0.00481289	0.00396002	0	0.00696243	0.00156865	0.00892554	0.513138	0.00974531	0.0466422
2	Aomori	27	Cement and cement products	0.00358891	0	0	0.0148755	0	0	0	0	0	0	0	0	0	0	0	0	0	0	0	0.00341726	0	0	0.008009	0	0	0	18.9331	0	0.159674	0	0	0	0	0	0	0	0.0658558	0	0	0	0	0	0	0.00677558	0	0
2	Aomori	28	Pottery, china and earthenware	0	0	0	0	0.0251405	0.00534844	0	0	0	0.106549	0	0	0	0	0.0199611	0	0	0	0	0.00405677	0	0	0	0.00874002	0	0.000701611	0.00725417	0.0568417	0	0	0	0.000692045	0	0	0	0	0.00891528	0.00136102	0.00338284	0	0.000634414	0.115134	0.00186092	0.0402179	0.00128902	0.132356
2	Aomori	29	Other ceramic, stone and clay products	0.271809	0	0	0.00226408	0.00928291	0.000822861	0	0	0.00302757	0.0166981	0.0668387	0.000370655	0.000399239	0.00439784	0.80417	0	0.00825627	0.0137394	0	0.0357838	0.0518725	0	0.0682633	0.030735	0.00876039	0.828141	0.487941	0.0789194	1.02785	0.0410189	0.00176337	0.423331	0	0.383333	0.0827341	0.0560825	0.187807	0.487048	0.0820232	0.13149	0.00312336	0.161103	0.0293939	0.67568	0.0122956	0.314506
2	Aomori	30	Pig iron and crude steel	0	0	0	0	0	0	0	0	0	0	0	0	0	0	0.610347	0	0	0	0	0	0	0	0	0	0	0	0	0	-0.0162451	16.2297	0.34809	94.0306	1.15951	0	0	-0.367427	-4.15759	-0.976278	-2.33263	-0.241566	-0.0587194	-0.476265	0	-2.93142	0	-1.84636
2	Aomori	31	steel products	0.00898955	0	0.00791029	0.0429926	0	0	0	0.00166954	0.0177947	0.800436	0	0	0	0	0	0	0	0	0	0	0	0	0	0.215821	0.238815	0	0.816631	0	0.0779398	0	4.09419	4.04762	6.67842	0.0154287	0.0485433	4.58588	13.105	2.98809	2.66837	3.20852	0.100085	1.93485	0.12323	2.25134	0.389763	2.46867
2	Aomori	32	Cast and forged steel products	0	0	0	0.00449106	0	0	0	0	0	0.137338	0	0	0	0	0	0	0	0	0	0	0	0	0	0	0	0	0.013283	0.0761574	0.0685616	0	0	1.42348	0	0	0.101418	3.85569	4.84297	9.90207	11.4016	10.4245	0.464666	4.66787	0.465692	1.7756	0.0944119	1.00111
2	Aomori	33	Other iron or steel products	0	0	0	0	0	0	0	0	0.00201344	1.86845	0	0	0	0	0.0673971	0	0.00101145	0	0	0.00484251	0	0	0	0.00804818	0	0	0.155866	0.00496471	0.0844743	0	0	0.211147	0	0	0.0389475	3.91517	12.796	1.43194	1.76866	0.355906	0.0717912	0.913051	0.00177709	1.72059	0.500379	0.595075
2	Aomori	34	Non-ferrous metals	0	0	0	0	0	0	0	0	0.00399675	0.112906	0.0540017	0	-0.0590287	0	18.3611	0	0.124481	0	0	3.54511	0	0	0	0.163309	-0.00367969	1.8633	0	0.354785	1.79263	0.1391	0.191466	0.409295	-0.0122129	47.7429	236.936	0.0942269	12.983	-0.0967481	0.169291	0.197895	-0.0036078	1.35704	0.0740791	88.096	0.0403173	1.22446
2	Aomori	35	Non-ferrous metal products	0	0	0	0.11765	13.5014	0.914565	0	0	0.499441	7.37189	0	0.588519	1.15255	0	2.58371	0	0	0	0	2.39039	1.66247	0	0	4.11476	2.47153	1.03457	0	0.086206	1.69629	0	0	0.0860635	0	1.42218	63.347	33.742	70.6775	26.1865	15.3373	31.2331	1.63428	50.6107	8.97053	218.139	9.96173	144.922
2	Aomori	36	Metal products for construction and architecture	0.0141602	0	0	0.0122275	0	0	0	0	0.00934335	0.18476	0	0	0	0	0	0	0	0	0	0	0	0	0	0	0	0	0.0458085	0	0	0	0	0.00690018	0	0	0.00502043	1.70715	0.474089	0.110824	0	0.143414	0	0	0	0	0	0.0378856
2	Aomori	37	Other metal products	0.547034	0	0.44337	0.292257	1.97988	10.1043	0	0.315669	1.09973	3.91847	0.16885	0.0834518	0.0275655	0	2.02293	0	0.888346	0.112279	0	1.24659	2.07977	0	0.0453759	0.492465	4.50657	0.382369	0.946141	0.16904	0.680921	0	0	0.902615	0.00132249	0.0970511	0.327897	2.71795	13.9667	4.81751	4.14966	2.88396	0.96692	2.60943	0.966047	4.46537	0.872764	16.1018
2	Aomori	38	General industrial machinery	0.00050451	0	0.00284813	0.000597461	0	0	0	0	7.13337e-05	0.00188079	0	0	0	0	0	0	0	0	0	0	0	0	8.04188e-05	0.066342	0	0.110592	7.36283e-05	0.00119608	0.00641319	0	0	0.0103957	0.000581266	0.00059245	0.0013032	0.00224234	0.0116939	1.0795	0.211504	0.039488	0.0236318	0.0247427	0.0128438	0.0105453	0.0237461	0.0165191
2	Aomori	39	Special industrial machinery	0	0	0	0	0	0	0	0	0	0	0	0	0	0	0	0	0	0	0	0	0	0	0	0	0	0.0407527	0	0	0	0	0	0	0	0	0	0	0	0.331273	34.2661	0.00192503	0.00526423	0.00355812	0.00514718	0.127926	0.0124787	0
2	Aomori	40	Other general machines	0	0	0.0227127	0.00314325	0	0	0	0	0.00360276	0.300238	0	0	0	0	0	0	0	0	0	0.00635431	0	0	0	0.0405363	0	0.00359662	0.000619775	0.0272431	0.0521843	0	0	0.0762729	0	0	0.0193586	0.0265432	0.0779273	0.918621	1.04394	2.85419	0.0525764	0.784189	0.119774	0.0784576	0.0842494	0.69093
2	Aomori	41	Machinery for office and service industry	0	0	0	0	0	0	0	0	0	0	0	0	0	0	0	0	0	0	0	0	0	0	0	0	0	0	0	0	0	0	0	0	0	0	0	0	0	0	0	0	39.1946	0	0	0	0	0
2	Aomori	42	Industrial electric equipment	0.0604945	0	0.00314551	0	0	0	0	0	0.00299371	0.0225521	0	0	0	0	0	0	0	0	0	0	0	0	0	0.00265923	0	0	0	0	0	0	0	0	0	0	0.00321719	0.161744	0.0204485	3.95094	5.93677	0.121549	0.951233	21.3514	1.93151	1.37622	1.25463	14.0434
2	Aomori	43	Applied electric equipment and electric mesuring instruments	0	0	0	0	0	0	0	0	0	0	0	0	0	0	0	0	0	0	0	0	0	0	0	0	0	0	0	0	0	0	0	0	0	0	0	0	0	0.260181	1.33372	0.0805613	0.135744	0.381288	4.15582	0	0	0.137723
2	Aomori	44	Other electric equipment	0.0018501	0	4.58089e-05	0	0.000623827	0	0	0	0	0.00168321	0	0	0	0	0.000132672	0	0	0	0	0.000629145	4.43125e-05	0	0	7.74541e-05	0	0	0	0	0	0	0	0	0	0	9.37057e-05	0	0.00268017	0.00130865	0.00612766	0.0016838	0.00295165	0.014484	0.00962005	0.422674	0.00919575	0.157022
2	Aomori	45	Household electric and electric applications	0	0	0	0	0	0	0	0	0	0	0	0	0	0	0	0	0	0	0	0	0	0	0	0.000817963	0	0	0	0	0	0	0	0	0	0	0	0	0	0	0	0	0	0	0	0	1.55971	0
2	Aomori	46	Communication equipment	0.00165927	0	0	0	0	0.00624886	0	0.00133537	0	0.00154642	0.00138682	0	0.00151593	0	0.00166583	0	0	0	0	0	0.0534133	0	0	0.00145877	0.00907186	0.00327891	0.00169508	0	0	0	0	0.0016171	0	0.00779399	0.00176486	0.00322647	0.00320498	0.0508846	0.0158094	0.0016263	0	0	0.030439	0.0125303	0.00150603	18.4086
2	Aomori	47	Electric computing equipment and accessory equipment	0	0	0	0	0	0	0	0	0	0	0	0	0	0	0	0	0	0	0	0	0	0	0	0	0	0	0	0	0	0	0	0	0	0	0	0	0	0	0.0212163	0	0	0	0	0	0	0.00387081
2	Aomori	48	Semiconductor devices and integrated circuits	0	0	0	0	0	0	0	0	0	0	0	0	0	0	0	0	0	0	0	0	0	0	0	0	0	0	0	0	0	0	0	0	0	0	0	0	0.117152	0.0547059	0.580151	0.202817	2.53302	3.28341	12.7845	0.47374	2.96839	96.3693
2	Aomori	49	Other electrical equipment	0	0	0	0	0.00978115	0.00303459	0	0	0	0	0	0.00546769	0.159012	0	0	0	0	0	0	0	0.00648469	0	0	0.00283366	0	0	0	0	0	0	0	0	0	0	0.0822773	0	0.591437	1.20156	1.64296	0.195862	5.36187	5.65806	30.0058	0.690649	5.5525	248.393
2	Aomori	50	Passenger motor cars	0	0	0	0	0	0	0	0	0	0	0	0	0	0	0	0	0	0	0	0	0	0	0	0	0	0	0	0	0	0	0	0	0	0	0	0	0	0	0	0	0	0	0	0	0	0
2	Aomori	51	Other cars	0	0	0	0	0	0	0	0	0	0	0	0	0	0	0	0	0	0	0	0	0	0	0	0	0	0	0	0	0	0	0	0	0	0	0	0	0	0	0	0	0	0	0	0	0	0
2	Aomori	52	Motor vheicle parts and accessories	0	0	0	0	0	0	0	0	0	0	0	0	0	0	0	0	0	0	0	0	0	0	0	0	0	0	0	0	0	0	0	0	0	0	0	0	0	0	0.00378041	0	0	0	0	0	0	0
2	Aomori	53	Other transportation equipment	2.34983	0	0.00206915	0	0	0	0	0	0	0	0	0	0	0	0	0	0	0	0	0	0	0	0	0	0	0	0	0	0	0	0	0	0	0	0	0	0	0	0	0	0	0	0	0	0	0
2	Aomori	54	Precision instruments	0.161351	0	0	0.00464426	0.0362702	0	0	0.00360704	0.00443601	0.00417714	0.0486985	0.00760318	0	0	0.0224984	0	0	0	0	0.0042676	0.0270521	0	0	0.0788077	0.00816819	0	0.0045787	0.0131259	0.00443127	0	0	0.00436806	0	0	0	0.0130728	0.00865718	0.987906	3.50171	0.0175716	0.200215	0.576492	0.242747	0.0126924	0.00813605	10.1888
2	Aomori	55	Miscellaneous manufacturing products	0.0633153	0	0.0239722	0.00445879	0.0478799	0.0645311	0	0.496939	0.0398507	0.216271	0.00462399	0.00312838	0.000842408	0.000618639	0.00030857	0	0.00336195	0	0	0.00526779	0.000309188	0	0.00205768	0.0105384	0.00140036	0.0510191	0.00125596	0.0255034	0.0413276	0	0	0.0727893	0	0.00036093	0.0385758	0.00776952	0.0106861	0.105155	0.00497837	0.00180748	0	0.00445448	0.00939728	0.00725329	0.00111588	0.120334
2	Aomori	56	Reuse and recycling	0	0	0	0	0	0	0	0	0	0	0	0	0	0	0	0	0	0	0	0	0	0	0	0	0	0	0	0	0	0	0	0	0	0	0	0	0	0	0	0	0	0	0	0	0	0
2	Aomori	57	Building construction and repair of construction	0	0	0	0	0	0	0	0	0	0	0	0	0	0	0	0	0	0	0	0	0	0	0	0	0	0	0	0	0	0	0	0	0	0	0	0	0	0	0	0	0	0	0	0	0	0
2	Aomori	58	Public construction	0	0	0	0	0	0	0	0	0	0	0	0	0	0	0	0	0	0	0	0	0	0	0	0	0	0	0	0	0	0	0	0	0	0	0	0	0	0	0	0	0	0	0	0	0	0
2	Aomori	59	Other civil enginnering and construction	0	0	0	0	0	0	0	0	0	0	0	0	0	0	0	0	0	0	0	0	0	0	0	0	0	0	0	0	0	0	0	0	0	0	0	0	0	0	0	0	0	0	0	0	0	0
2	Aomori	60	Electricity	0	0	0	0	0	0	0	0	0	0	0	0	0	0	0	0	0	0	0	0	0	0	0	0	0	0	0	0	0	0	0	0	0	0	0	0	0	0	0	0	0	0	0	0	0	0
2	Aomori	61	Gas supply and heat supply	0	0	0	0	0	0	0	0	0	0	0	0	0	0	0	0	0	0	0	0	0	0	0	0	0	0	0	0	0	0	0	0	0	0	0	0	0	0	0	0	0	0	0	0	0	0
2	Aomori	62	Water supply and waste management services	0	0	0	0	0	0	0	0	0	0	0	0	0	0	0	0	0	0	0	0	0	0	0	0	0	0	0	0	0	0	0	0	0	0	0	0	0	0	0	0	0	0	0	0	0	0
2	Aomori	63	Commerce	73.7811	0	2.20281	0.677515	216.769	19.1495	1.60138	31.346	25.3398	30.1361	51.2201	30.3188	13.3195	3.52392	23.6149	0	21.0097	6.50321	0.420077	30.2125	26.4182	0	4.00952	89.1797	49.8943	22.5363	11.587	1.63526	12.1863	0.279204	1.88613	19.0482	8.74327	29.659	25.536	17.5946	45.1574	32.4485	33.3521	16.8314	9.66514	23.9642	18.5087	73.4567	8.95082	193.849
2	Aomori	64	Financial and insurance	0.236221	0	0.0472662	0.0175534	0.248073	0.0451481	0.0119382	0.110827	0.0475129	0.0600424	0.0539764	0.0463768	0.0264767	0.0174154	0.0756675	0	0.0386138	0.0214409	0.00113821	0.114893	0.0579917	0	0.00186108	0.052515	0.0709114	0.0941428	0.0640572	0.00686912	0.0384954	0.000987497	0.00457465	0.0341872	0.00888033	0.128538	0.110713	0.0458118	0.0763142	0.0569945	0.0588	0.0478685	0.00544845	0.0211988	0.0142517	0.120004	0.00804253	0.218246
2	Aomori	65	Real estate agencies and rental services	0	0	0	0	0	0	0	0	0	0	0	0	0	0	0	0	0	0	0	0	0	0	0	0	0	0	0	0	0	0	0	0	0	0	0	0	0	0	0	0	0	0	0	0	0	0
2	Aomori	66	House rent	0	0	0	0	0	0	0	0	0	0	0	0	0	0	0	0	0	0	0	0	0	0	0	0	0	0	0	0	0	0	0	0	0	0	0	0	0	0	0	0	0	0	0	0	0	0
2	Aomori	67	Transport	61.2277	0	13.568	1.23202	50.0444	7.47849	0.421748	4.34302	10.9797	6.09578	9.74349	6.57633	3.66578	1.21779	7.45839	0	4.024	1.7107	0.147376	6.72481	7.97722	0.00303958	1.49137	13.2273	6.54134	6.9444	16.0002	0.463237	6.70122	0.127135	0.60105	6.39238	1.82052	26.8933	7.80083	6.48474	13.7488	6.45256	5.80231	4.20915	1.24597	3.89238	2.05884	15.7625	0.985835	23.3113
2	Aomori	68	Communication	0.165759	0	0.0355701	0.0906519	0.270809	0.0972298	0.0115005	0.163575	0.044921	0.123834	0.0967594	0.0959626	0.0871375	0.0158875	0.168395	0	0.0431696	0.0212555	0.00229822	0.120879	1.8812	0	0.0146789	0.279893	0.392596	0.133883	0.069885	0.00834755	0.0728375	0	0.00928998	0.108339	0.00530494	0.337552	0.177006	0.277553	0.286504	0.360572	0.224993	0.180516	0.0387864	0.137038	0.114347	0.439606	0.0388066	0.886975
2	Aomori	69	Broadcasting	0	0	0	0	0	0	0	0	0	0	0	0	0	0	0	0	0	0	0	0	0	0	0	0	0	0	0	0	0	0	0	0	0	0	0	0	0	0	0	0	0	0	0	0	0	0
2	Aomori	70	Information services	0.0843218	0	0.00263594	0.00402731	0.185635	0.0793894	0.00132951	0.0194472	0.0195681	0.0596882	0.0405345	0.0288092	0.0203785	0.0158157	0.0324029	0	0.0396559	0.0202187	0.000885613	0.0473044	0.292381	0	0.00282824	0.130438	0.0897707	0.0596059	0.0309005	0.0069283	0.0466126	0.00130968	0.00528458	0.0385367	0.0107323	0.0813589	0.076387	0.0382802	0.164667	0.09927	0.167283	0.0578024	0.0170599	0.12138	0.14983	0.385859	0.00782211	0.678012
2	Aomori	71	﻿Internet based services	0.000753246	0	0.000261108	0.000390261	0.00723855	0.00366412	0.000219495	0.00383929	0.00149104	0.00351008	0.00136406	0.00149077	0.00263799	0.000252686	0.00315092	0	0.000998694	0.000328927	0	0.00227119	0.0367502	0	0.000140078	0.0100438	0.00537663	0.00310104	0.00153901	0.000122553	0.00124121	0	0.000126647	0.00305876	0.000126561	0.00796088	0.00413941	0.0054926	0.00763842	0.00625616	0.00526302	0.00246092	0.000560808	0.00409377	0.0033997	0.0139837	0.00091157	0.0307894
2	Aomori	72	Image information production and distribution industry	0.0876128	0	0.0410001	0.0378272	0.322006	0.0302456	0.0306364	0.326696	0.0433572	0.174195	0.125706	0.16225	0.0480263	0.254231	0.212567	0	0.0450127	0.0242306	0.00255094	0.155722	0.687454	0	0.0146637	0.31709	0.504293	0.331838	0.181991	0.034211	0.192012	0.00125748	0.00589232	0.08254	0.0117766	0.138894	0.0745502	0.127773	0.612045	0.207108	0.230952	0.0987522	0.0560975	0.17327	0.158172	0.905598	0.0477127	1.79322
2	Aomori	73	Public administration	0	0	0	0	0	0	0	0	0	0	0	0	0	0	0	0	0	0	0	0	0	0	0	0	0	0	0	0	0	0	0	0	0	0	0	0	0	0	0	0	0	0	0	0	0	0
2	Aomori	74	Education and Research	0	0	0	0	0	0	0	0	0	0	0	0	0	0	0	0	0	0	0	0	0	0	0	0	0	0	0	0	0	0	0	0	0	0	0	0	0	0	0	0	0	0	0	0	0	0
2	Aomori	75	Medical service, health and social security and nursing care	0	0	0	0	0	0	0	0	0	0	0	0	0	0	0	0	0	0	0	0	0	0	0	0	0	0	0	0	0	0	0	0	0	0	0	0	0	0	0	0	0	0	0	0	0	0
2	Aomori	76	Advertising and survery	0.00718307	0	0.00497994	0.00264112	0.87115	0.282151	0.00121537	0.0277232	0.0087912	0.054636	0.0899252	0.127487	0.00508065	0.00816173	0.0452847	0	0.00660515	0.00593612	0.000809584	0.221659	0.493536	0	0.000258544	0.102943	0.107542	0.0161788	0.0116778	0.00429774	0.0148909	0.000266055	0.00194794	0.0141516	0.00171302	0.0124259	0.0146231	0.0201253	0.0399824	0.0433014	0.0434186	0.0268743	0.0148362	0.0330221	0.0322513	0.153327	0.0169651	0.369279
2	Aomori	77	Giids rental and leasing services	0.388224	0	0.0524768	0.0583958	0.695629	0.110972	0.0206078	0.112644	0.0944202	0.170955	0.126836	0.0949756	0.0878299	0.00963788	0.189702	0	0.031499	0.0414978	0.00257386	0.0932907	0.103378	0	0.0706897	0.60005	0.344699	0.292968	0.388325	0.0237315	0.271305	0.00444073	0.0137484	0.191692	0.0293348	0.0839123	0.202546	0.123191	0.840232	0.619142	0.614154	0.336104	0.0773336	0.616566	0.194344	1.06742	0.0645229	2.98106
2	Aomori	78	Other business services	0.23463	0	0.0255755	0.0231162	0.449806	0.0655582	0.00357449	0.0938814	0.0529674	0.061533	0.048448	0.0551848	0.0728998	0.0159154	0.156112	0	0.0432305	0.0169626	0.00147064	0.0720835	0.157877	0	0.0105337	0.29139	0.253361	0.234145	0.124454	0.00469596	0.0831712	0.000828514	0.00424623	0.129921	0.00503138	0.120111	0.104825	0.105407	0.183394	0.169361	0.123464	0.0614697	0.0245511	0.097441	0.0809977	0.298903	0.0279435	0.54184
2	Aomori	79	Personal services	0.0855991	0	0.00222543	0	0.0671061	0.0171258	0	0.0137778	0.0105902	0.00897495	0.0134145	0.00726049	0.0058653	0.00215365	0.0204101	0	0.00531993	0.00467243	0	0.0101881	0.020451	0	0	0.0310429	0.0214501	0.0116293	0.00983773	0.00104452	0.00211577	0	0	0.00729957	0.00215736	0.0276429	0.0227615	0.00728211	0.027901	0.0164066	0.0152921	0.0094385	0.00477978	0.0174457	0.0084123	0.0585815	0.00194233	0.0858824
2	Aomori	80	Activities not elsewhere classified	0	0	0	0	0	0	0	0	0	0	0	0	0	0	0	0	0	0	0	0	0	0	0	0	0	0	0	0	0	0	0	0	0	0	0	0	0	0	0	0	0	0	0	0	0	0
3	Iwate	1	Agriculture, forestry and fishery	370.3	0	0.00881106	0.166811	1043.01	27.1621	0.0814753	0.184106	116.756	0.00789648	0	0.0143731	0	0.102322	0.774063	0	1.33118	0	0	1.08911	2.70187	0	0.1229	0	72.2724	0	0	0	0.150784	0	0	0	0	0	0.0270356	0	0	0	0	0	0	0	0	0	0	0
3	Iwate	2	Metallic ores	0	0	0	0	0	0	0	0	0	0	0	0	0	1.3305e-07	0.000102067	0	0	3.75254e-07	0	0	0	0	0	0	0	1.9594e-07	0	9.6794e-08	3.46381e-06	5.6925e-08	0	0	0	0.00336698	0	0	0	0	0	0	0	0	0	0	0	0
3	Iwate	3	Non-metallic ores	0.0324296	0	0.0786906	0	0	0	0	0	0	0	0.596303	0.00305629	0	0.70713	4.67745	0	0.36189	0	0	0.25389	0.047122	0	1.56399	0	0.229839	17.2209	11.1609	0.830136	8.05131	-0.00310301	0	0.115886	0	0.0677018	0.0114977	0.00700662	0.0139199	0	0	0.052975	0	0	0	0	0	0
3	Iwate	4	Coal mining, crude petroleum and natural gas	0	0	0	0	0	0	0	0	0	0	0	0	0	0	0	0	0	0	0	0	0	0	0	0	0	0	0	0	0	0	0	0	0	0	0	0	0	0	0	0	0	0	0	0	0	0
3	Iwate	5	Food and Tobacco	138.312	0	0	0	382.179	31.4564	0	1.54145	0.02881	0	1.849	0.00493796	0	0.0410124	0.204565	0	1.19255	0.0101689	0	1.62972	6.71731	0	0	0.0870101	0	0.178318	0	0.0227326	0.460469	0	0	0.00567375	0	0	0	0	0	0	0	0	0	0	0	0	0	0
3	Iwate	6	Beverage	7.35678	0	0	0	11.8987	18.2675	0	0	0	0	0	0	0	0	0	0	0.0803902	0	0	0	0.365966	0	0	0	0	0	0	0	0	0	0	0	0	0	0	0	0	0	0	0	0	0	0	0	0	0
3	Iwate	7	Textile products	0.399652	0	0	0	0.0468104	0.000990196	0.728171	18.6396	0.0176958	0.484212	0.304143	1.39786	0.0192171	0.0306946	0	0	0	0	0.00826788	0.00200283	0	0	0	0.127599	2.01637	0.0353313	0.00107441	0	0.0707077	0	0	0.00204997	0	0	0.0615251	0.00511267	0.0629749	0.00907109	0.0190392	0.00103081	0	0	0	0.85081	0.157506	0.414575
3	Iwate	8	Wearing aparel and other textile products	4.21883	0	0.319574	0.0955292	2.42023	0.256261	0.0652421	3.62139	0.477953	0.568714	0.543043	0.420769	0.0561509	0.247413	0.193925	0	0.16152	0.0268386	0	0.317685	0.556443	0	0.342888	0.258591	0.536044	1.23188	0.260118	0.102853	0.572931	0	0.00885744	0.402176	0.044257	0.0927947	0.485616	0.192071	0.903079	0.475407	0.305343	0.537849	0.0666771	0.592504	0.299127	0.663044	0.203214	2.4509
3	Iwate	9	Timber and wooden products	4.88951	0	0.0832203	0.0580457	2.68753	0.519871	0	0.186769	62.3257	55.3996	0.013377	1.51365	0.0146222	0.0080536	0	0	0.00795758	0.0139781	0	0.175253	0	0	0	0.57691	0.0218762	2.05579	0.114453	1.14055	1.30547	0	0	1.31025	0	0	2.75778	0.389022	1.90897	0.153381	0.205866	0.0784342	0.19304	0.202964	0.0699064	0.823387	0.0653704	1.7628
3	Iwate	10	Furniture and fixtures	0.06165	0	0.0983048	0.102212	1.73368	0.0851309	0.0107789	0.347307	0.0569499	9.64896	0.175193	0.191735	0.0600789	0.0289538	0.292963	0	0.0939998	0.0466636	0	0.332641	0.673924	0	0.00458593	0.899728	0.310847	0.0446701	0.100769	0.108329	0.195049	0	0.0165848	0.348483	0	0.0193056	0.183604	0.0439556	0.230222	0.169367	0.140975	0.112793	0.0293759	0.152638	0.186697	1.09795	0.126834	12.873
3	Iwate	11	Pulp, paper, paperboard, building paper	0.301863	0	0	0	6.88263	0.0454729	0.0158333	0.22836	1.3325	3.70796	146.166	90.1667	26.5801	0	2.46687	0	0	1.18108	0	5.08742	1.06889	0	0	4.47973	1.62839	6.13814	0	0.495059	3.01433	0	0	0	0.0304315	0	0.654984	0.023479	0.227395	0.133072	0.00575223	0.520719	0	3.68036	0.0738347	4.96377	0.268504	5.20653
3	Iwate	12	Paper products	13.8575	0	0	0	21.9202	7.37138	0.0449896	0.897379	0.050936	2.00808	0.229406	3.32333	0.156726	0.348737	0.930007	0	0.208112	0.0569321	0.0269716	4.02472	7.44116	0	0.00382821	1.93046	0.203213	5.97986	0.0315447	0.974635	0.702167	0	0	0	0.0830109	0	0.273693	0.00333572	1.63687	0.338662	0.058841	0.316097	0.128741	0.42887	0.212795	2.50024	0.479563	4.64477
3	Iwate	13	Publishing, printing	0.0530314	0	0.0143867	0.0215028	10.547	0.562248	0.0382974	0.924096	0.0821545	0.797241	0.0770848	2.62064	4.90398	0.0464089	0.333334	0	0.0343917	0.0463155	0.014098	2.28106	0.81877	0	0.00771814	0.190547	0.214305	1.253	0.049465	0.0292609	0.136778	0.00198559	0.00930412	0.361786	0.00232444	0.0947666	0.19129	0.0650105	0.745981	0.31598	0.472325	0.250848	0.506756	0.164994	0.243716	0.74654	0.464593	9.71811
3	Iwate	14	Chemical fertilizer	94.8478	0	0	0	0.0241035	0.07852	0	0.0095883	0	0	0	0.0101055	0	33.8842	7.99002	0	4.12283	0.634721	0	2.52976	1.0427	0	0	0	0.0325693	0.235435	0	0	0.106014	0	0.024038	0	0	0.36376	0.0126722	0	0	0	0.0113516	0	0	0	0	0.832233	0	0
3	Iwate	15	Basic inorganic chemical products	0.0111488	0	0.000158822	0	0.164994	0.032928	0.0194926	0.0291298	0.000151158	0.00284674	0.0642064	0.00958595	0.00013953	0.199041	2.05535	0	0.421583	0.042149	0.000800408	0.703829	0.387312	0	0.000681636	0.140043	1.07075	0.407581	0.0031204	0.0152071	0.0141937	0.00315647	0.00154069	0.0110143	0.000615858	0.0403526	0.0149447	0.0308852	0.027582	0.00673261	0.00596606	0.0143701	0.00109158	0.0109287	0.00853846	0.461617	0.00194066	0.142061
3	Iwate	16	Basic organic chemical products	0	0	0	0	0.000154611	0	0	0	0	0	6.87874e-05	9.97249e-06	7.51908e-05	0.00287528	0.0180479	0	0.0529734	0.00724945	6.16186e-05	0.00822828	0.000508577	0	0	3.10097e-05	0.000246412	0.000755097	0	0	9.29944e-05	0	0	0	0	0	0	0	0	4.50698e-05	0	0	0	0	0	0	0	0
3	Iwate	17	Organic chemical products	0.000179949	0	3.74269e-05	0	0.0446335	0.00599757	0.00431032	5.79284e-05	0.00203038	0.00315295	0.0290877	0.0195979	0.00062473	0.00297002	0.205988	0	0.353119	0.44008	0.0236087	0.318696	0.211397	0	0.000481888	0.198104	0.815576	0.0152552	0.000220599	0.000175666	0.0540145	0	0	0	0	0.00376141	0.00937856	0.000139965	0.00121653	0.000172452	0.000171453	0.00112878	0.000868163	0.00182559	0.000471588	0.038865	0.00339725	0.0114585
3	Iwate	18	Synthetic resins	0	0	0	0	0	0	1.78109e-05	0	8.06603e-05	0.00402552	0.0143722	0.0039401	0.000390891	0	0	0	0	0.00023132	0.0019398	0.0395362	0	0	0	0.644889	0.000352742	0.0293707	0	0	0.00316254	0	0	0	0	0	0.00884154	1.98087e-05	0.000747717	0	0	0.000559134	0.000218432	0.00404163	0	0.0179821	0.0028848	0.0317069
3	Iwate	19	Synthetic fibers	0	0	0	0	0	0	0	0	0	0	0	0	0	0	0	0	0	0	0	0	0	0	0	0	0	0	0	0	0	0	0	0	0	0	0	0	0	0	0	0	0	0	0	0	0	0
3	Iwate	20	Final chemical products	6.89443	0	0.0900801	0.00873747	0.754483	0.0454683	0.0884564	0.205434	0.846706	1.0502	1.30317	0.796485	0.942649	0.0609451	0.138526	0	0.581603	0.158667	0.0167394	7.96096	1.02869	0	0.229227	1.03516	0.586748	0.360524	0.198908	0.00224494	0.503995	0	0.00154662	0.214411	0.00309114	0.00540105	0.163067	0.258615	0.770679	0.158678	0.2381	0.13073	0.217787	0.227748	0.0984363	1.08685	0.0500948	1.0364
3	Iwate	21	Medicaments	1.97785	0	0	0	0.201815	0	0	0.0118935	0	0	0	0	0	0	0	0	0	0	0	0.060977	13.4394	0	0	0	0	0	0	0	0	0	0	0	0	0	0	0	0	0	0	0	0	0	0	0	0	0
3	Iwate	22	Petroleum refinery products	0	0	0	0	0	0	0	0	0	0	0	0	0	0	0	0	0	0	0	0	0	0	0	0	0	0	0	0	0	0	0	0	0	0	0	0	0	0	0	0	0	0	0	0	0	0
3	Iwate	23	Coal products	0	0	2.13967e-05	0	0	0	0	0	1.01821e-05	0	6.87869e-05	0	0	0.000776497	0.000991507	0	0.0104958	0	0	5.87731e-05	0	0	0	5.42667e-05	0	0	0	0	0.00227835	3.5437e-05	0.000570801	0.00605577	1.03711e-05	0.00146177	0.000131306	0.000200042	3.9742e-05	0	2.94056e-05	2.01662e-05	0	2.79556e-05	0	9.71105e-06	0	9.17476e-06
3	Iwate	24	Plastic products	9.73356	0	0.010097	0.0452739	28.2663	16.1162	0.0297075	2.86771	1.37419	8.41099	3.64771	16.6684	7.92134	0.752392	4.4303	0	0.0337919	0	0.0424044	10.3127	17.4344	0	0	222.044	15.1334	4.77268	0.0892695	0.0710865	0.551969	0	0	0.0331188	0	0.273641	4.37353	0.302077	1.49563	1.34454	2.12771	2.23633	2.65874	6.54329	1.44188	71.8596	4.00971	74.8747
3	Iwate	25	Rubber products	0.554254	0	0.0757622	0.0429263	0.15895	0.0121044	0.00124878	0.380529	0.0240353	0.126477	0.091933	0.189016	0.0404575	0.0258771	0.0243803	0	0.032671	0.0137234	0	0.110173	0.212677	0	0.0159391	0.172055	6.07494	0.00141143	0.0335644	0	0.14547	0.00369048	0.0317037	0.097453	0.00288019	0.0100649	0.0212714	0.166663	0.158654	0.937749	2.44581	0.365426	0.344588	0.604268	0.209642	0.724111	0.226898	3.09575
3	Iwate	26	Glass and glass products	0.113228	0	0	0	1.87713	13.4618	0.0109982	0.207561	0.0249037	9.19843	0	0	0	0	1.32621	0	0.150124	0	0	1.82083	7.35939	0	0	5.75154	0.303797	15.041	0.0771143	0	0.485104	0	0	0	0	0	0.903245	0.116202	0.795846	0.174822	0.143843	0	0.252902	0.0569792	0.324209	18.6391	0.353987	1.69422
3	Iwate	27	Cement and cement products	0.00763811	0	0	0.0316588	0	0	0	0	0	0	0	0	0	0	0	0	0	0	0	0.00727278	0	0	0.0170452	0	0	0	40.2945	0	0.339827	0	0	0	0	0	0	0	0.140158	0	0	0	0	0	0	0.0144201	0	0
3	Iwate	28	Pottery, china and earthenware	0	0	0	0	0.0176268	0.00374996	0	0	0	0.0747051	0	0	0	0	0.0139954	0	0	0	0	0.00284433	0	0	0	0.0061279	0	0.000491922	0.00508613	0.0398535	0	0	0	0.000485215	0	0	0	0	0.00625079	0.000954251	0.00237182	0	0.000444808	0.080724	0.00130475	0.028198	0.000903772	0.0927989
3	Iwate	29	Other ceramic, stone and clay products	1.16683	0	0	0.00971934	0.0398501	0.00353241	0	0	0.0129969	0.0716825	0.286928	0.00159117	0.00171387	0.0188793	3.45218	0	0.0354429	0.0589813	0	0.153614	0.222681	0	0.293044	0.131941	0.037607	3.55508	2.09465	0.338789	4.41238	0.176088	0.00756987	1.81729	0	1.64559	0.355165	0.240753	0.806225	2.09082	0.352113	0.564467	0.0134081	0.691591	0.126183	2.90059	0.0527831	1.35013
3	Iwate	30	Pig iron and crude steel	0	0	0	0	0	0	0	0	0	0	0	0	0	0	0	0	0	0	0	0	0	0	0	0	0	0	0	0	0	0	0	0	0	0	0	0	0	0	0	0	0	0	0	0	0	0
3	Iwate	31	steel products	0.045832	0	0.0403295	0.219192	0	0	0	0.00851194	0.0907239	4.08091	0	0	0	0	0	0	0	0	0	0	0	0	0	1.10033	1.21756	0	4.16348	0	0.397365	0	20.8737	20.6362	34.049	0.0786612	0.247491	23.3805	66.814	15.2344	13.6043	16.3582	0.510268	9.86458	0.628273	11.4782	1.98715	12.5862
3	Iwate	32	Cast and forged steel products	0	0	0	0.0142878	0	0	0	0	0	0.436926	0	0	0	0	0	0	0	0	0	0	0	0	0	0	0	0	0.0422584	0.242287	0.218121	0	0	4.52864	0	0	0.32265	12.2665	15.4074	31.5024	36.2729	33.1646	1.47829	14.8503	1.48155	5.64887	0.300362	3.18493
3	Iwate	33	Other iron or steel products	0	0	0	0	0	0	0	0	0.00973614	9.03505	0	0	0	0	0.325904	0	0.00489092	0	0	0.0234163	0	0	0	0.0389176	0	0	0.753699	0.0240072	0.408481	0	0	1.02102	0	0	0.188333	18.9321	61.8759	6.92427	8.5525	1.72101	0.347152	4.41512	0.00859323	8.32003	2.41962	2.87753
3	Iwate	34	Non-ferrous metals	0	0	0	0	0	0	0	0	0.00196213	0.0554289	0.0265111	0	-0.0289791	0	9.01404	0	0.0611116	0	0	1.74041	0	0	0	0.0801738	-0.00180648	0.914753	0	0.174175	0.880057	0.0682887	0.0939966	0.200936	-0.0059957	23.4385	116.319	0.046259	6.37376	-0.0474967	0.0831102	0.097153	-0.00177118	0.666215	0.0363678	43.2491	0.019793	0.601127
3	Iwate	35	Non-ferrous metal products	0	0	0	0.0213384	2.44877	0.165876	0	0	0.0905846	1.33705	0	0.106741	0.209041	0	0.468612	0	0	0	0	0.43355	0.301525	0	0	0.746303	0.448267	0.187643	0	0.0156354	0.307659	0	0	0.0156095	0	0.257943	11.4894	6.11986	12.8189	4.7495	2.78175	5.66482	0.296413	9.17937	1.627	39.5642	1.80678	26.2847
3	Iwate	36	Metal products for construction and architecture	0.0506145	0	0	0.043706	0	0	0	0	0.0333969	0.660409	0	0	0	0	0	0	0	0	0	0	0	0	0	0	0	0	0.163738	0	0	0	0	0.0246641	0	0	0.017945	6.10205	1.69459	0.39613	0	0.512621	0	0	0	0	0	0.135419
3	Iwate	37	Other metal products	4.66163	0	3.77825	2.49051	16.8718	86.1055	0	2.69002	9.37149	33.3918	1.43888	0.711147	0.234904	0	17.2387	0	7.57018	0.9568	0	10.623	17.7231	0	0.386678	4.19662	38.4035	3.25841	8.06269	1.4405	5.80258	0	0	7.69177	0.0112698	0.827036	2.79422	23.1614	119.02	41.0531	35.362	24.5761	8.23976	22.2367	8.23232	38.0523	7.43739	137.214
3	Iwate	38	General industrial machinery	0.0361017	0	0.203807	0.0427531	0	0	0	0	0.0051045	0.134585	0	0	0	0	0	0	0	0	0	0	0	0	0.0057546	4.7473	0	7.91377	0.0052687	0.0855889	0.458915	0	0	0.743895	0.0415942	0.0423945	0.0932545	0.160457	0.83679	77.2467	15.1348	2.82568	1.69104	1.77054	0.919079	0.754597	1.69923	1.18208
3	Iwate	39	Special industrial machinery	0	0	0	0	0	0	0	0	0	0	0	0	0	0	0	0	0	0	0	0	0	0	0	0	0	0.261093	0	0	0	0	0	0	0	0	0	0	0	2.12239	219.534	0.0123332	0.0337266	0.022796	0.0329767	0.819588	0.0799476	0
3	Iwate	40	Other general machines	0	0	0.315405	0.0436494	0	0	0	0	0.0500305	4.16932	0	0	0	0	0	0	0	0	0	0.0882404	0	0	0	0.562916	0	0.0499452	0.00860664	0.378318	0.724668	0	0	1.05918	0	0	0.268827	0.368598	1.08215	12.7566	14.4969	39.6354	0.730114	10.8898	1.66327	1.08952	1.16995	9.59475
3	Iwate	41	Machinery for office and service industry	0	0	0	0	0	0	0	0	0	0	0	0	0	0	0	0	0	0	0	0	0	0	0	0	0	0	0	0	0	0	0	0	0	0	0	0	0	0	0	0	34.6424	0	0	0	0	0
3	Iwate	42	Industrial electric equipment	0.162382	0	0.0084433	0	0	0	0	0	0.00803582	0.0605351	0	0	0	0	0	0	0	0	0	0	0	0	0	0.00713801	0	0	0	0	0	0	0	0	0	0	0.00863571	0.43416	0.0548886	10.6053	15.9357	0.326266	2.55334	57.3123	5.18462	3.69409	3.36774	37.6959
3	Iwate	43	Applied electric equipment and electric mesuring instruments	0	0	0	0	0	0	0	0	0	0	0	0	0	0	0	0	0	0	0	0	0	0	0	0	0	0	0	0	0	0	0	0	0	0	0	0	0	0.308885	1.58338	0.0956415	0.161153	0.452661	4.93375	0	0	0.163503
3	Iwate	44	Other electric equipment	0.0441707	0	0.00109368	0	0.0148938	0	0	0	0	0.0401864	0	0	0	0	0.00316752	0	0	0	0	0.0150207	0.00105795	0	0	0.00184921	0	0	0	0	0	0	0	0	0	0	0.00223721	0	0.0639887	0.0312439	0.146297	0.0402005	0.0704702	0.345802	0.229677	10.0913	0.219547	3.74888
3	Iwate	45	Household electric and electric applications	0	0	0	0	0	0	0	0	0	0	0	0	0	0	0	0	0	0	0	0	0	0	0	0.00110528	0	0	0	0	0	0	0	0	0	0	0	0	0	0	0	0	0	0	0	0	2.10758	0
3	Iwate	46	Communication equipment	0.016373	0	0	0	0	0.0616612	0	0.0131768	0	0.0152595	0.0136846	0	0.0149585	0	0.0164377	0	0	0	0	0	0.527061	0	0	0.0143946	0.0895174	0.032355	0.0167264	0	0	0	0	0.0159569	0	0.0769079	0.0174149	0.0318375	0.0316254	0.502109	0.156001	0.0160476	0	0	0.300359	0.123644	0.0148609	181.649
3	Iwate	47	Electric computing equipment and accessory equipment	0	0	0	0	0	0	0	0	0	0	0	0	0	0	0	0	0	0	0	0	0	0	0	0	0	0	0	0	0	0	0	0	0	0	0	0	0	0	0.183037	0	0	0	0	0	0	0.0333942
3	Iwate	48	Semiconductor devices and integrated circuits	0	0	0	0	0	0	0	0	0	0	0	0	0	0	0	0	0	0	0	0	0	0	0	0	0	0	0	0	0	0	0	0	0	0	0	0	1.31441	0.613779	6.50907	2.27553	28.4195	36.8386	143.437	5.31518	33.3042	1081.23
3	Iwate	49	Other electrical equipment	0	0	0	0	0.0193135	0.005992	0	0	0	0	0	0.0107963	0.313981	0	0	0	0	0	0	0	0.0128044	0	0	0.00559524	0	0	0	0	0	0	0	0	0	0	0.162462	0	1.16783	2.37256	3.24414	0.386743	10.5874	11.1722	59.2484	1.36373	10.9638	490.468
3	Iwate	50	Passenger motor cars	0	0	0	0	0	0	0	0	0	0	0	0	0	0	0	0	0	0	0	0	0	0	0	0	0	0	0	0	0	0	0	0	0	0	0	0	0	0	0	0	0	0	0	0	0	0
3	Iwate	51	Other cars	0	0	0	0	0	0	0	0	0	0	0	0	0	0	0	0	0	0	0	0	0	0	0	0	0	0	0	0	0	0	0	0	0	0	0	0	0	0	0	0	0	0	0	0	0	0
3	Iwate	52	Motor vheicle parts and accessories	0	0	0	0	0	0	0	0	0	0	0	0	0	0	0	0	0	0	0	0	0	0	0	0	0	0	0	0	0	0	0	0	0	0	0	0	0	0	0.19177	0	0	0	0	0	0	0
3	Iwate	53	Other transportation equipment	3.20478	0	0.00282198	0	0	0	0	0	0	0	0	0	0	0	0	0	0	0	0	0	0	0	0	0	0	0	0	0	0	0	0	0	0	0	0	0	0	0	0	0	0	0	0	0	0	0
3	Iwate	54	Precision instruments	0.201363	0	0	0.00579594	0.0452645	0	0	0.00450151	0.00553604	0.00521299	0.0607747	0.00948861	0	0	0.0280775	0	0	0	0	0.00532588	0.0337605	0	0	0.0983504	0.0101937	0	0.00571412	0.0163808	0.00553014	0	0	0.00545125	0	0	0	0.0163146	0.010804	1.23289	4.37006	0.0219289	0.249865	0.71945	0.302943	0.0158399	0.0101536	12.7154
3	Iwate	55	Miscellaneous manufacturing products	0.59061	0	0.223614	0.041592	0.446627	0.601951	0	4.63549	0.37173	2.01739	0.043133	0.0291817	0.00785804	0.00577071	0.00287836	0	0.0313605	0	0	0.0491383	0.00288413	0	0.0191942	0.0983032	0.0130626	0.47591	0.0117157	0.237898	0.385507	0	0	0.678984	0	0.00336678	0.359838	0.0724747	0.0996812	0.98089	0.0464386	0.0168603	0	0.0415517	0.0876585	0.0676592	0.010409	1.12248
3	Iwate	56	Reuse and recycling	0.290388	0	0	0	0.111147	7.29318	0	0	0	0	4.87382	0	0	2.15628	1.51283	0	0.343389	0	0	0	0	0	0	15.6629	0.107274	3.2104	0.761683	0.2988	0.442295	1.1287	0.015835	8.84974	0.300659	12.8199	21.5121	0	0.0151595	0	0	0	0	0	0	0.0889021	0	0
3	Iwate	57	Building construction and repair of construction	0	0	0	0	0	0	0	0	0	0	0	0	0	0	0	0	0	0	0	0	0	0	0	0	0	0	0	0	0	0	0	0	0	0	0	0	0	0	0	0	0	0	0	0	0	0
3	Iwate	58	Public construction	0	0	0	0	0	0	0	0	0	0	0	0	0	0	0	0	0	0	0	0	0	0	0	0	0	0	0	0	0	0	0	0	0	0	0	0	0	0	0	0	0	0	0	0	0	0
3	Iwate	59	Other civil enginnering and construction	0	0	0	0	0	0	0	0	0	0	0	0	0	0	0	0	0	0	0	0	0	0	0	0	0	0	0	0	0	0	0	0	0	0	0	0	0	0	0	0	0	0	0	0	0	0
3	Iwate	60	Electricity	0	0	0	0	0	0	0	0	0	0	0	0	0	0	0	0	0	0	0	0	0	0	0	0	0	0	0	0	0	0	0	0	0	0	0	0	0	0	0	0	0	0	0	0	0	0
3	Iwate	61	Gas supply and heat supply	0	0	0	0	0	0	0	0	0	0	0	0	0	0	0	0	0	0	0	0	0	0	0	0	0	0	0	0	0	0	0	0	0	0	0	0	0	0	0	0	0	0	0	0	0	0
3	Iwate	62	Water supply and waste management services	0	0	0	0	0	0	0	0	0	0	0	0	0	0	0	0	0	0	0	0	0	0	0	0	0	0	0	0	0	0	0	0	0	0	0	0	0	0	0	0	0	0	0	0	0	0
3	Iwate	63	Commerce	45.3699	0	1.35456	0.416621	133.296	11.7755	0.98473	19.2754	15.5821	18.5314	31.4965	18.6438	8.19048	2.16695	14.5214	0	12.9194	3.99899	0.258316	18.5784	16.2452	0	2.46555	54.8388	30.6812	13.8581	7.12513	1.00556	7.49363	0.171689	1.15983	11.7132	5.37645	18.238	15.7027	10.8194	27.7684	19.9534	20.509	10.3501	5.94333	14.7362	11.3814	45.1704	5.50408	119.203
3	Iwate	64	Financial and insurance	0.015242	0	0.00304982	0.00113262	0.0160068	0.00291315	0.000770307	0.00715101	0.00306574	0.00387419	0.00348279	0.00299243	0.00170839	0.00112372	0.00488239	0	0.00249153	0.00138346	7.34422e-05	0.00741341	0.00374187	0	0.000120085	0.0033885	0.00457551	0.0060745	0.00413325	0.000443225	0.00248389	6.37176e-05	0.000295176	0.00220591	0.000572997	0.0082938	0.00714367	0.00295597	0.00492412	0.00367753	0.00379403	0.00308868	0.000351558	0.00136784	0.00091958	0.00774315	0.000518939	0.0140822
3	Iwate	65	Real estate agencies and rental services	0	0	0	0	0	0	0	0	0	0	0	0	0	0	0	0	0	0	0	0	0	0	0	0	0	0	0	0	0	0	0	0	0	0	0	0	0	0	0	0	0	0	0	0	0	0
3	Iwate	66	House rent	0	0	0	0	0	0	0	0	0	0	0	0	0	0	0	0	0	0	0	0	0	0	0	0	0	0	0	0	0	0	0	0	0	0	0	0	0	0	0	0	0	0	0	0	0	0
3	Iwate	67	Transport	54.068	0	11.9814	1.08795	44.1924	6.60399	0.372431	3.83517	9.6958	5.38297	8.60413	5.80733	3.23712	1.07538	6.58624	0	3.55345	1.51066	0.130142	5.93844	7.0444	0.00268415	1.31698	11.6805	5.77643	6.13235	14.1292	0.409068	5.91761	0.112268	0.530766	5.64488	1.60764	23.7485	6.88863	5.72644	12.141	5.69802	5.12382	3.71695	1.10027	3.43723	1.81809	13.9193	0.870556	20.5854
3	Iwate	68	Communication	0.0245449	0	0.00526707	0.0134233	0.0401002	0.0143974	0.00170294	0.0242215	0.0066517	0.0183367	0.0143277	0.0142097	0.0129029	0.00235255	0.0249352	0	0.00639236	0.00314743	0.00034031	0.0178992	0.27856	0	0.00217358	0.0414453	0.0581338	0.0198249	0.0103483	0.00123607	0.0107854	0	0.00137562	0.0160423	0.000785532	0.0499832	0.0262103	0.0410989	0.0424243	0.0533919	0.0333159	0.0267301	0.00574332	0.020292	0.0169319	0.065095	0.0057463	0.131339
3	Iwate	69	Broadcasting	0	0	0	0	0	0	0	0	0	0	0	0	0	0	0	0	0	0	0	0	0	0	0	0	0	0	0	0	0	0	0	0	0	0	0	0	0	0	0	0	0	0	0	0	0	0
3	Iwate	70	Information services	0	0	0	0	0	0	0	0	0	0	0	0	0	0	0	0	0	0	0	0	0	0	0	0	0	0	0	0	0	0	0	0	0	0	0	0	0	0	0	0	0	0	0	0	0	0
3	Iwate	71	﻿Internet based services	0	0	0	0	0	0	0	0	0	0	0	0	0	0	0	0	0	0	0	0	0	0	0	0	0	0	0	0	0	0	0	0	0	0	0	0	0	0	0	0	0	0	0	0	0	0
3	Iwate	72	Image information production and distribution industry	0.000461852	0	0.000216133	0.000199407	0.00169746	0.00015944	0.0001615	0.00172218	0.000228558	0.000918273	0.000662662	0.000855301	0.000253171	0.00134018	0.00112055	0	0.000237285	0.000127732	1.34473e-05	0.000820888	0.00362392	0	7.73e-05	0.00167155	0.00265838	0.00174929	0.000959366	0.000180344	0.00101219	6.62881e-06	3.10614e-05	0.00043511	6.20804e-05	0.000732181	0.000392992	0.000673556	0.0032264	0.00109177	0.00121746	0.000520573	0.000295718	0.000913395	0.000833808	0.00477387	0.000251518	0.00945296
3	Iwate	73	Public administration	0	0	0	0	0	0	0	0	0	0	0	0	0	0	0	0	0	0	0	0	0	0	0	0	0	0	0	0	0	0	0	0	0	0	0	0	0	0	0	0	0	0	0	0	0	0
3	Iwate	74	Education and Research	0	0	0	0	0	0	0	0	0	0	0	0	0	0	0	0	0	0	0	0	0	0	0	0	0	0	0	0	0	0	0	0	0	0	0	0	0	0	0	0	0	0	0	0	0	0
3	Iwate	75	Medical service, health and social security and nursing care	0	0	0	0	0	0	0	0	0	0	0	0	0	0	0	0	0	0	0	0	0	0	0	0	0	0	0	0	0	0	0	0	0	0	0	0	0	0	0	0	0	0	0	0	0	0
3	Iwate	76	Advertising and survery	0.0370032	0	0.0256539	0.0136056	4.48769	1.45349	0.00626093	0.142815	0.0452874	0.281455	0.463245	0.656743	0.0261727	0.0420448	0.233282	0	0.0340261	0.0305796	0.00417053	1.14186	2.54243	0	0.00133187	0.530305	0.553996	0.083344	0.0601577	0.0221396	0.0767098	0.00137057	0.0100347	0.0729011	0.00882455	0.0640116	0.0753299	0.103674	0.205967	0.223065	0.223669	0.138441	0.0764282	0.170112	0.166141	0.789859	0.087395	1.90232
3	Iwate	77	Giids rental and leasing services	0.41113	0	0.055573	0.0618412	0.736672	0.11752	0.0218237	0.11929	0.0999911	0.181042	0.13432	0.100579	0.093012	0.0102065	0.200894	0	0.0333575	0.0439462	0.00272572	0.098795	0.109477	0	0.0748605	0.635453	0.365036	0.310253	0.411236	0.0251316	0.287312	0.00470274	0.0145596	0.203002	0.0310655	0.0888632	0.214497	0.13046	0.889807	0.655672	0.650389	0.355934	0.0818964	0.652944	0.205811	1.1304	0.0683298	3.15695
3	Iwate	78	Other business services	0	0	0	0	0	0	0	0	0	0	0	0	0	0	0	0	0	0	0	0	0	0	0	0	0	0	0	0	0	0	0	0	0	0	0	0	0	0	0	0	0	0	0	0	0	0
3	Iwate	79	Personal services	0.04828	0	0.0012552	0	0.0378495	0.00965938	0	0.00777105	0.00597311	0.0050621	0.0075661	0.0040951	0.00330818	0.00121471	0.0115118	0	0.00300058	0.00263537	0	0.00574635	0.0115349	0	0	0.017509	0.0120984	0.00655922	0.00554873	0.000589137	0.00119335	0	0	0.00411714	0.0012168	0.0155913	0.012838	0.00410729	0.0157369	0.00925372	0.00862513	0.00532355	0.00269592	0.00983979	0.00474474	0.0330415	0.00109552	0.0484398
3	Iwate	80	Activities not elsewhere classified	0	0	0	0	0	0	0	0	0	0	0	0	0	0	0	0	0	0	0	0	0	0	0	0	0	0	0	0	0	0	0	0	0	0	0	0	0	0	0	0	0	0	0	0	0	0
4	Miyagi	1	Agriculture, forestry and fishery	385.434	0	0.00917114	0.173628	1085.64	28.2721	0.0848049	0.19163	121.527	0.00821918	0	0.0149605	0	0.106504	0.805697	0	1.38558	0	0	1.13362	2.81228	0	0.127923	0	75.2259	0	0	0	0.156946	0	0	0	0	0	0.0281404	0	0	0	0	0	0	0	0	0	0	0
4	Miyagi	2	Metallic ores	0	0	0	0	0	0	0	0	0	0	0	0	0	0	0	0	0	0	0	0	0	0	0	0	0	0	0	0	0	0	0	0	0	0	0	0	0	0	0	0	0	0	0	0	0	0
4	Miyagi	3	Non-metallic ores	0.010749	0	0.0260826	0	0	0	0	0	0	0	0.19765	0.00101303	0	0.234384	1.55038	0	0.119951	0	0	0.0841538	0.015619	0	0.518397	0	0.076182	5.70802	3.69939	0.275155	2.66867	-0.00102852	0	0.0384115	0	0.0224403	0.00381101	0.0023224	0.00461386	0	0	0.017559	0	0	0	0	0	0
4	Miyagi	4	Coal mining, crude petroleum and natural gas	0	0	0	0	0	0	0	0	0	0	0	0	0	0	0	0	0	0	0	0	0	0	0	0	0	0	0	0	0	0	0	0	0	0	0	0	0	0	0	0	0	0	0	0	0	0
4	Miyagi	5	Food and Tobacco	291.232	0	0	0	804.72	66.235	0	3.24569	0.0606627	0	3.89328	0.0103974	0	0.0863561	0.430734	0	2.51104	0.0214117	0	3.43155	14.144	0	0	0.183209	0	0.375468	0	0.047866	0.969568	0	0	0.0119467	0	0	0	0	0	0	0	0	0	0	0	0	0	0
4	Miyagi	6	Beverage	4.90429	0	0	0	7.93211	12.1778	0	0	0	0	0	0	0	0	0	0	0.0535909	0	0	0	0.243966	0	0	0	0	0	0	0	0	0	0	0	0	0	0	0	0	0	0	0	0	0	0	0	0	0
4	Miyagi	7	Textile products	0.24012	0	0	0	0.0281247	0.000594932	0.437501	11.1991	0.010632	0.290925	0.182736	0.839866	0.0115461	0.018442	0	0	0	0	0.00496753	0.00120334	0	0	0	0.0766643	1.21148	0.0212278	0.000645532	0	0.0424828	0	0	0.00123167	0	0	0.0369656	0.00307181	0.0378367	0.00545011	0.0114392	0.000619335	0	0	0	0.511186	0.0946331	0.249086
4	Miyagi	8	Wearing aparel and other textile products	2.43056	0	0.184113	0.0550363	1.39434	0.147637	0.0375873	2.08635	0.275358	0.327648	0.312858	0.242414	0.0323497	0.14254	0.111724	0	0.0930552	0.0154623	0	0.183025	0.320578	0	0.197545	0.14898	0.308826	0.709713	0.149859	0.0592559	0.330077	0	0.00510295	0.231702	0.0254974	0.0534609	0.279774	0.110656	0.520282	0.273892	0.175915	0.309866	0.038414	0.341353	0.172333	0.381993	0.117076	1.41201
4	Miyagi	9	Timber and wooden products	5.73091	0	0.097541	0.0680343	3.15001	0.609332	0	0.218908	73.0508	64.9328	0.0156789	1.77412	0.0171385	0.00943948	0	0	0.00932694	0.0163835	0	0.205411	0	0	0	0.676185	0.0256407	2.40956	0.134148	1.33682	1.53012	0	0	1.53572	0	0	3.23235	0.455965	2.23747	0.179776	0.241292	0.0919313	0.226258	0.23789	0.081936	0.965078	0.0766195	2.06615
4	Miyagi	10	Furniture and fixtures	0.0762076	0	0.121518	0.126347	2.14306	0.105233	0.0133241	0.429317	0.0703976	11.9274	0.216561	0.23701	0.0742654	0.0357908	0.362141	0	0.116196	0.0576824	0	0.411188	0.833059	0	0.00566882	1.11218	0.384248	0.0552181	0.124564	0.133909	0.241106	0	0.0205011	0.43077	0	0.0238643	0.226959	0.0543349	0.284585	0.20936	0.174263	0.139427	0.0363124	0.18868	0.230783	1.35721	0.156784	15.9127
4	Miyagi	11	Pulp, paper, paperboard, building paper	2.1854	0	0	0	49.8283	0.32921	0.114628	1.65326	9.64692	26.8446	1058.2	652.781	192.432	0	17.8594	0	0	8.55071	0	36.8314	7.73847	0	0	32.4319	11.7891	44.4384	0	3.58409	21.8229	0	0	0	0.220315	0	4.7419	0.169981	1.64628	0.963401	0.0416445	3.76986	0	26.6447	0.534542	35.9362	1.94389	37.6938
4	Miyagi	12	Paper products	20.9431	0	0	0	33.1283	11.1405	0.0679935	1.35622	0.0769805	3.03484	0.346705	5.0226	0.236862	0.527052	1.40554	0	0.314523	0.0860425	0.0407626	6.08263	11.246	0	0.00578565	2.91753	0.307119	9.03747	0.047674	1.47298	1.0612	0	0	0	0.125456	0	0.413636	0.00504134	2.47383	0.511826	0.0889274	0.477722	0.194569	0.648158	0.321601	3.77865	0.724772	7.01973
4	Miyagi	13	Publishing, printing	0.187228	0	0.0507924	0.0759159	37.2361	1.98502	0.135209	3.26253	0.290047	2.81467	0.272149	9.25217	17.3135	0.163847	1.17684	0	0.12142	0.163517	0.049773	8.05328	2.89067	0	0.0272489	0.672729	0.756606	4.42372	0.174637	0.103306	0.482896	0.00701014	0.0328482	1.27729	0.00820646	0.334574	0.675349	0.22952	2.63369	1.11557	1.66755	0.885619	1.78911	0.582513	0.86044	2.63567	1.64025	34.3098
4	Miyagi	14	Chemical fertilizer	83.3913	0	0	0	0.0211921	0.0690357	0	0.00843015	0	0	0	0.00888484	0	29.7914	7.02493	0	3.62484	0.558054	0	2.22419	0.916756	0	0	0	0.0286353	0.206998	0	0	0.0932085	0	0.0211345	0	0	0.319822	0.0111415	0	0	0	0.00998045	0	0	0	0	0.731709	0	0
4	Miyagi	15	Basic inorganic chemical products	0.227912	0	0.00324676	0	3.37293	0.673136	0.398481	0.595491	0.00309007	0.0581949	1.31255	0.195962	0.00285236	4.06893	42.0169	0	8.61829	0.861638	0.0163625	14.3881	7.9177	0	0.0139345	2.86285	21.8889	8.33204	0.0637893	0.310873	0.290156	0.0645268	0.0314959	0.225163	0.0125898	0.824915	0.305509	0.631376	0.56385	0.137633	0.121962	0.293763	0.0223148	0.223413	0.174549	9.43669	0.0396723	2.9041
4	Miyagi	16	Basic organic chemical products	0	0	0	0	0.059421	0	0	0	0	0	0.0264367	0.00383267	0.0288977	1.10504	6.93625	0	20.359	2.78614	0.0236815	3.16233	0.195459	0	0	0.0119178	0.0947022	0.290202	0	0	0.03574	0	0	0	0	0	0	0	0	0.0173214	0	0	0	0	0	0	0	0
4	Miyagi	17	Organic chemical products	0.000538902	0	0.000112084	0	0.133666	0.0179612	0.0129083	0.000173481	0.00608048	0.0094423	0.0871103	0.058691	0.00187091	0.00889446	0.616883	0	1.0575	1.31793	0.0707023	0.954415	0.633082	0	0.00144313	0.593271	2.44245	0.0456856	0.000660639	0.000526076	0.16176	0	0	0	0	0.0112645	0.0280865	0.00041916	0.00364322	0.00051645	0.00051346	0.00338042	0.00259993	0.00546718	0.00141229	0.116391	0.0101739	0.0343155
4	Miyagi	18	Synthetic resins	0	0	0	0	0	0	0.000159592	0	0.000722745	0.0360702	0.12878	0.0353048	0.00350253	0	0	0	0	0.00207271	0.0173813	0.354259	0	0	0	5.77844	0.0031607	0.263172	0	0	0.0283375	0	0	0	0	0	0.0792234	0.000177493	0.00669982	0	0	0.00501004	0.00195723	0.0362145	0	0.161127	0.0258489	0.284106
4	Miyagi	19	Synthetic fibers	0	0	0	0	0.291208	0	0.129014	0.345967	0.000459809	0.00837088	0.0116487	0.0002627	0	0	0	0	0	0	0	0	0	0	0.00120953	0.0106193	0.000987775	0.0335088	0	0	0.0751751	0	0	0	0	0	0	0	0	0	0	0	0	0	0	0	0	0
4	Miyagi	20	Final chemical products	19.1656	0	0.250411	0.024289	2.09736	0.126396	0.245897	0.571079	2.35373	2.91943	3.62263	2.21413	2.62044	0.169419	0.385083	0	1.61678	0.441074	0.0465332	22.1304	2.85961	0	0.637221	2.8776	1.63108	1.00221	0.552938	0.00624065	1.40104	0	0.00429941	0.596035	0.00859297	0.0150142	0.453305	0.718917	2.14239	0.441105	0.661888	0.363413	0.605418	0.63311	0.27364	3.0213	0.139257	2.88105
4	Miyagi	21	Medicaments	2.01237	0	0	0	0.205338	0	0	0.0121012	0	0	0	0	0	0	0	0	0	0	0	0.0620414	13.674	0	0	0	0	0	0	0	0	0	0	0	0	0	0	0	0	0	0	0	0	0	0	0	0	0
4	Miyagi	22	Petroleum refinery products	177.824	0	7.32413	0.768201	113.205	25.4449	7.68874	3.76965	13.4077	3.48608	19.1803	8.08886	5.48005	24.5533	102.88	0	11.192	2.76647	0.529823	30.7386	26.509	0.0388532	64.3339	29.1224	19.468	95.8913	14.1832	5.06598	39.5804	0.232155	0.883868	17.0119	1.0871	41.4713	11.828	5.79906	32.0892	8.2027	13.196	9.347	2.10747	5.67745	0.706494	16.0638	1.31519	7.60339
4	Miyagi	23	Coal products	0	0	0.00253466	0	0	0	0	0	0.00120617	0	0.00814851	0	0	0.0919839	0.117454	0	1.24334	0	0	0.00696227	0	0	0	0.00642844	0	0	0	0	0.269893	0.00419787	0.0676171	0.717367	0.00122856	0.173162	0.0155545	0.0236971	0.00470784	0	0.00348339	0.00238889	0	0.00331163	0	0.00115037	0	0.00108684
4	Miyagi	24	Plastic products	15.8111	0	0.0164014	0.0735423	45.9154	26.1789	0.0482564	4.65827	2.23221	13.6627	5.92529	27.0759	12.8673	1.22218	7.19652	0	0.0548911	0	0.0688811	16.7518	28.3202	0	0	360.685	24.5825	7.75268	0.145008	0.115472	0.896611	0	0	0.0537978	0	0.444498	7.1043	0.490689	2.42949	2.18405	3.45622	3.63267	4.31883	10.6288	2.34217	116.728	6.51332	121.625
4	Miyagi	25	Rubber products	5.87802	0	0.80348	0.455245	1.68571	0.12837	0.0132437	4.03561	0.254901	1.34132	0.974976	2.00457	0.429063	0.274434	0.258559	0	0.346485	0.145541	0	1.16842	2.2555	0	0.169038	1.82469	64.4265	0.0149686	0.35596	0	1.54275	0.0391386	0.336226	1.03352	0.0305452	0.106741	0.225589	1.7675	1.68258	9.94509	25.9385	3.87544	3.65445	6.40844	2.22332	7.6794	2.40631	32.8313
4	Miyagi	26	Glass and glass products	0.244838	0	0	0	4.05901	29.1091	0.0237819	0.44882	0.0538505	19.8902	0	0	0	0	2.86773	0	0.32462	0	0	3.93727	15.9136	0	0	12.4368	0.656916	32.524	0.166748	0	1.04896	0	0	0	0	0	1.95313	0.25127	1.7209	0.378027	0.311039	0	0.546862	0.123209	0.701054	40.3043	0.765443	3.6635
4	Miyagi	27	Cement and cement products	0.00496973	0	0	0.0205987	0	0	0	0	0	0	0	0	0	0	0	0	0	0	0	0.00473203	0	0	0.0110904	0	0	0	26.2176	0	0.221108	0	0	0	0	0	0	0	0.0911934	0	0	0	0	0	0	0.00938245	0	0
4	Miyagi	28	Pottery, china and earthenware	0	0	0	0	0.360338	0.076659	0	0	0	1.52717	0	0	0	0	0.286102	0	0	0	0	0.0581456	0	0	0	0.12527	0	0.0100562	0.103974	0.81471	0	0	0	0.00991906	0	0	0	0	0.127782	0.0195074	0.0484861	0	0.00909304	1.65021	0.0266726	0.576442	0.0184755	1.89705
4	Miyagi	29	Other ceramic, stone and clay products	3.83445	0	0	0.0319397	0.130955	0.0116082	0	0	0.0427104	0.235563	0.942903	0.00522888	0.00563212	0.0620409	11.3445	0	0.116472	0.193824	0	0.504807	0.731772	0	0.962999	0.433583	0.123584	11.6827	6.88344	1.11333	14.4999	0.578659	0.0248761	5.97198	0	5.40773	1.16714	0.791163	2.64941	6.87085	1.15711	1.85495	0.0440617	2.2727	0.414663	9.53191	0.173456	4.43678
4	Miyagi	30	Pig iron and crude steel	0	0	0	0	0	0	0	0	0	0	0	0	0	0	0.379248	0	0	0	0	0	0	0	0	0	0	0	0	0	-0.0100941	10.0846	0.216291	58.4273	0.720479	0	0	-0.228306	-2.58338	-0.606625	-1.44942	-0.150101	-0.0364862	-0.295934	0	-1.82148	0	-1.14726
4	Miyagi	31	steel products	0.137453	0	0.120951	0.65737	0	0	0	0.0255279	0.272087	12.2389	0	0	0	0	0	0	0	0	0	0	0	0	0	3.29996	3.65155	0	12.4865	0	1.19172	0	62.6015	61.8894	102.115	0.23591	0.742243	70.1195	200.38	45.6888	40.8003	49.0592	1.53033	29.5845	1.88423	34.4237	5.9596	37.7467
4	Miyagi	32	Cast and forged steel products	0	0	0	0.00908419	0	0	0	0	0	0.277797	0	0	0	0	0	0	0	0	0	0	0	0	0	0	0	0	0.0268678	0.154046	0.138681	0	0	2.87931	0	0	0.205141	7.799	9.796	20.0292	23.0622	21.086	0.939892	9.44182	0.941968	3.59155	0.190969	2.02498
4	Miyagi	33	Other iron or steel products	0	0	0	0	0	0	0	0	0.0149336	13.8583	0	0	0	0	0.499883	0	0.00750186	0	0	0.0359167	0	0	0	0.0596931	0	0	1.15605	0.0368231	0.626543	0	0	1.56607	0	0	0.288872	29.0387	94.9075	10.6207	13.1181	2.63974	0.532473	6.77207	0.0131806	12.7616	3.7113	4.41365
4	Miyagi	34	Non-ferrous metals	0	0	0	0	0	0	0	0	0.000180955	0.00511185	0.00244495	0	-0.00267255	0	0.831305	0	0.00563592	0	0	0.160506	0	0	0	0.00739391	-0.000166599	0.0843617	0	0.016063	0.0811619	0.00629782	0.00866869	0.018531	-0.000552944	2.16158	10.7274	0.00426616	0.58781	-0.00438031	0.00766471	0.00895979	-0.000163345	0.0614407	0.00335396	3.98858	0.00182538	0.055438
4	Miyagi	35	Non-ferrous metal products	0	0	0	0.103642	11.8938	0.805669	0	0	0.439973	6.49413	0	0.518445	1.01532	0	2.27607	0	0	0	0	2.10577	1.46452	0	0	3.62482	2.17725	0.911388	0	0.0759416	1.49431	0	0	0.075816	0	1.25284	55.8044	29.7244	62.262	23.0686	13.5111	27.5143	1.43969	44.5846	7.90243	192.165	8.77561	127.666
4	Miyagi	36	Metal products for construction and architecture	0.151616	0	0	0.130922	0	0	0	0	0.100041	1.97827	0	0	0	0	0	0	0	0	0	0	0	0	0	0	0	0	0.490481	0	0	0	0	0.0738816	0	0	0.0537547	18.2788	5.07616	1.18661	0	1.53556	0	0	0	0	0	0.405648
4	Miyagi	37	Other metal products	2.52407	0	2.04576	1.3485	9.13535	46.6224	0	1.45653	5.07425	18.0802	0.779093	0.385055	0.12719	0	9.33401	0	4.09892	0.518065	0	5.75189	9.59628	0	0.209369	2.27229	20.7938	1.76429	4.36559	0.77997	3.14184	0	0	4.16476	0.00610209	0.447804	1.51295	12.5409	64.4439	22.2285	19.147	13.3069	4.46147	12.0402	4.45744	20.6037	4.02702	74.2952
4	Miyagi	38	General industrial machinery	0.0328088	0	0.185217	0.0388535	0	0	0	0	0.0046389	0.122309	0	0	0	0	0	0	0	0	0	0	0	0	0.00522971	4.31428	0	7.19193	0.00478812	0.077782	0.417055	0	0	0.676041	0.0378003	0.0385276	0.0847485	0.145821	0.760463	70.2007	13.7543	2.56794	1.5368	1.60904	0.835247	0.685768	1.54423	1.07425
4	Miyagi	39	Special industrial machinery	0	0	0	0	0	0	0	0	0	0	0	0	0	0	0	0	0	0	0	0	0	0	0	0	0	0.127679	0	0	0	0	0	0	0	0	0	0	0	1.03789	107.357	0.00603116	0.016493	0.0111477	0.0161263	0.400795	0.039096	0
4	Miyagi	40	Other general machines	0	0	0.173778	0.0240495	0	0	0	0	0.0275653	2.29717	0	0	0	0	0	0	0	0	0	0.0486178	0	0	0	0.31015	0	0.0275183	0.004742	0.208442	0.39927	0	0	0.583576	0	0	0.148116	0.203086	0.596234	7.02852	7.98735	21.8379	0.402271	5.99995	0.916409	0.600292	0.644606	5.28642
4	Miyagi	41	Machinery for office and service industry	0	0	0	0	0	0	0	0	0	0	0	0	0	0	0	0	0	0	0	0	0	0	0	0	0	0	0	0	0	0	0	0	0	0	0	0	0	0	0	0	42.1509	0	0	0	0	0
4	Miyagi	42	Industrial electric equipment	0.237656	0	0.0123573	0	0	0	0	0	0.0117609	0.088597	0	0	0	0	0	0	0	0	0	0	0	0	0	0.0104469	0	0	0	0	0	0	0	0	0	0	0.0126389	0.63542	0.080333	15.5215	23.3229	0.477512	3.73697	83.8802	7.58803	5.40654	4.9289	55.1703
4	Miyagi	43	Applied electric equipment and electric mesuring instruments	0	0	0	0	0	0	0	0	0	0	0	0	0	0	0	0	0	0	0	0	0	0	0	0	0	0	0	0	0	0	0	0	0	0	0	0	0	0.329257	1.68781	0.10195	0.171782	0.482517	5.25915	0	0	0.174287
4	Miyagi	44	Other electric equipment	0.295981	0	0.00732858	0	0.0998007	0	0	0	0	0.269283	0	0	0	0	0.021225	0	0	0	0	0.100652	0.00708918	0	0	0.0123912	0	0	0	0	0	0	0	0	0	0	0.0149912	0	0.428778	0.209361	0.980312	0.269377	0.472209	2.31716	1.53903	67.6201	1.47115	25.1207
4	Miyagi	45	Household electric and electric applications	0	0	0	0	0	0	0	0	0	0	0	0	0	0	0	0	0	0	0	0	0	0	0	9.26716e-05	0	0	0	0	0	0	0	0	0	0	0	0	0	0	0	0	0	0	0	0	0.176709	0
4	Miyagi	46	Communication equipment	0.0128809	0	0	0	0	0.0485098	0	0.0103664	0	0.0120049	0.0107659	0	0.0117681	0	0.0129318	0	0	0	0	0	0.414647	0	0	0.0113244	0.0704247	0.0254542	0.0131589	0	0	0	0	0.0125535	0	0.0605046	0.0137005	0.025047	0.0248802	0.395016	0.122728	0.0126249	0	0	0.236297	0.0972725	0.0116913	142.906
4	Miyagi	47	Electric computing equipment and accessory equipment	0	0	0	0	0	0	0	0	0	0	0	0	0	0	0	0	0	0	0	0	0	0	0	0	0	0	0	0	0	0	0	0	0	0	0	0	0	0	0.389081	0	0	0	0	0	0	0.0709858
4	Miyagi	48	Semiconductor devices and integrated circuits	0	0	0	0	0	0	0	0	0	0	0	0	0	0	0	0	0	0	0	0	0	0	0	0	0	0	0	0	0	0	0	0	0	0	0	0	0.211128	0.0985892	1.04553	0.365511	4.56493	5.91725	23.0398	0.853759	5.34954	173.674
4	Miyagi	49	Other electrical equipment	0	0	0	0	0.0448705	0.013921	0	0	0	0	0	0.0250827	0.729461	0	0	0	0	0	0	0	0.0297482	0	0	0.0129992	0	0	0	0	0	0	0	0	0	0	0.377443	0	2.71318	5.51209	7.53701	0.898507	24.5973	25.956	137.65	3.16831	25.4718	1139.49
4	Miyagi	50	Passenger motor cars	0	0	0	0	0	0	0	0	0	0	0	0	0	0	0	0	0	0	0	0	0	0	0	0	0	0	0	0	0	0	0	0	0	0	0	0	0	0	0	0	0	0	0	0	0	0
4	Miyagi	51	Other cars	0	0	0	0	0	0	0	0	0	0	0	0	0	0	0	0	0	0	0	0	0	0	0	0	0	0	0	0	0	0	0	0	0	0	0	0	0	0	0	0	0	0	0	0	0	0
4	Miyagi	52	Motor vheicle parts and accessories	0	0	0	0	0	0	0	0	0	0	0	0	0	0	0	0	0	0	0	0	0	0	0	0	0	0	0	0	0	0	0	0	0	0	0	0	0	0	0.403074	0	0	0	0	0	0	0
4	Miyagi	53	Other transportation equipment	3.28288	0	0.00289075	0	0	0	0	0	0	0	0	0	0	0	0	0	0	0	0	0	0	0	0	0	0	0	0	0	0	0	0	0	0	0	0	0	0	0	0	0	0	0	0	0	0	0
4	Miyagi	54	Precision instruments	0.163265	0	0	0.00469935	0.0367004	0	0	0.00364982	0.00448862	0.00422669	0.0492761	0.00769336	0	0	0.0227652	0	0	0	0	0.00431822	0.027373	0	0	0.0797424	0.00826507	0	0.00463301	0.0132816	0.00448383	0	0	0.00441987	0	0	0	0.0132279	0.00875986	0.999623	3.54324	0.01778	0.20259	0.583329	0.245626	0.0128429	0.00823255	10.3096
4	Miyagi	55	Miscellaneous manufacturing products	1.44034	0	0.545337	0.101432	1.08921	1.468	0	11.3047	0.906552	4.91989	0.10519	0.0711666	0.0191637	0.0140733	0.00701957	0	0.07648	0	0	0.119836	0.00703364	0	0.0468096	0.239736	0.0318563	1.16062	0.0285714	0.580171	0.94015	0	0	1.65586	0	0.0082107	0.877549	0.176747	0.243096	2.39213	0.113252	0.0411179	0	0.101334	0.213776	0.165003	0.0253848	2.73744
4	Miyagi	56	Reuse and recycling	0.155419	0	0	0	0.0594868	3.90338	0	0	0	0	2.60852	0	0	1.15406	0.809682	0	0.183785	0	0	0	0	0	0	8.38295	0.0574142	1.71824	0.40766	0.159921	0.23672	0.60409	0.00847502	4.73647	0.160916	6.86136	11.5135	0	0.00811351	0	0	0	0	0	0	0.0475813	0	0
4	Miyagi	57	Building construction and repair of construction	0	0	0	0	0	0	0	0	0	0	0	0	0	0	0	0	0	0	0	0	0	0	0	0	0	0	0	0	0	0	0	0	0	0	0	0	0	0	0	0	0	0	0	0	0	0
4	Miyagi	58	Public construction	0	0	0	0	0	0	0	0	0	0	0	0	0	0	0	0	0	0	0	0	0	0	0	0	0	0	0	0	0	0	0	0	0	0	0	0	0	0	0	0	0	0	0	0	0	0
4	Miyagi	59	Other civil enginnering and construction	0	0	0	0	0	0	0	0	0	0	0	0	0	0	0	0	0	0	0	0	0	0	0	0	0	0	0	0	0	0	0	0	0	0	0	0	0	0	0	0	0	0	0	0	0	0
4	Miyagi	60	Electricity	0.0245081	0	0.00377501	0.00608798	0.0482456	0.0106581	0.00162338	0.00635791	0.0103943	0.0054561	0.0496403	0.0054194	0.00567439	0.00537429	0.0596164	0	0.0188518	0.00297793	0.0016862	0.0141054	0.0080844	0	0.00153354	0.0444123	0.0271891	0.0251069	0.00485522	0.00119829	0.0181317	0.00236713	0.00134416	0.0567786	0.00192496	0.0461886	0.0245835	0.00475339	0.0434682	0.0108889	0.0100062	0.0108897	0.00332755	0.00618663	0.0018055	0.0328798	0.00183785	0.0178525
4	Miyagi	61	Gas supply and heat supply	1.57865e-05	0	5.47231e-06	1.09054e-05	0.00373675	0.00204615	0.000115005	6.35241e-05	2.60411e-05	9.31814e-05	0.000382638	0.000223168	4.80756e-06	0.000704341	0.000850557	0	0.000361053	0.000193022	1.37892e-05	0.00061128	0.000926371	0	2.34861e-05	0.00117046	0.000728846	0.00660835	6.45089e-05	0.000292805	0.000390199	2.71895e-05	0.000164565	0.00224113	1.06098e-05	0.000142126	0.00191978	0.000317203	0.00162627	0.000242061	0.000275756	0.000159885	4.70136e-05	0.000338423	9.19365e-05	0.00371553	9.55234e-06	0.0012014
4	Miyagi	62	Water supply and waste management services	0.000494107	0	0.000151704	9.02093e-05	0.00348683	0.00152631	0.000139869	0.00010604	0.000160684	0.000144729	0.00241689	0.000259443	0.000124678	0.000400179	0.00208108	0	0.00119792	0.000939098	5.34353e-05	0.00148311	0.00184383	0	2.10028e-05	0.00100946	0.000467396	0.000678839	0.000764367	4.1344e-05	0.000781629	2.02622e-05	8.07031e-05	0.00037836	5.2184e-05	0.000809564	0.000595621	0.000173858	0.000647625	0.00066293	0.000896723	0.000306715	5.67576e-05	0.000249358	9.4548e-05	0.00129264	5.97963e-05	0.00105339
4	Miyagi	63	Commerce	198.099	0	5.91444	1.8191	582.015	51.4156	4.29964	84.1627	68.0364	80.9142	137.524	81.4046	35.7622	9.46159	63.405	0	56.41	17.4608	1.12789	81.1192	70.9317	0	10.7654	239.444	133.964	60.509	31.1106	4.39059	32.7196	0.749649	5.06417	51.1436	23.4753	79.6331	68.5631	47.2408	121.246	87.1228	89.549	45.1916	25.9505	64.3428	49.695	197.228	24.0326	520.477
4	Miyagi	64	Financial and insurance	0.291233	0	0.0582736	0.0216412	0.305845	0.0556623	0.0147184	0.136636	0.0585778	0.0740251	0.0665465	0.0571771	0.0326426	0.0214711	0.0932891	0	0.0476062	0.0264341	0.00140328	0.14165	0.0714969	0	0.00229449	0.0647448	0.0874254	0.116067	0.078975	0.00846882	0.0474603	0.00121747	0.00564	0.0421488	0.0109484	0.158472	0.136496	0.0564805	0.0940864	0.0702675	0.0724935	0.0590162	0.0067173	0.0261356	0.0175706	0.14795	0.00991549	0.269072
4	Miyagi	65	Real estate agencies and rental services	0.00215645	0	0.00237194	0.00403935	0.0150179	0.00589571	0.000362532	0.00527321	0.00217538	0.0073821	0.00544176	0.00534658	0.00405396	0.00116859	0.00761902	0	0.00569079	0.00253529	0.000217341	0.00615993	0.0156858	0	0.000601541	0.0143649	0.00619737	0.0105715	0.00550748	0.000566765	0.00291108	7.1425e-05	0.00037652	0.00476912	0.000543492	0.00569776	0.00357283	0.0074188	0.0128964	0.00540498	0.00620344	0.00455235	0.000815112	0.00356858	0.00268078	0.0311995	0.0011292	0.0435306
4	Miyagi	66	House rent	0	0	0	0	0	0	0	0	0	0	0	0	0	0	0	0	0	0	0	0	0	0	0	0	0	0	0	0	0	0	0	0	0	0	0	0	0	0	0	0	0	0	0	0	0	0
4	Miyagi	67	Transport	143.353	0	31.7669	2.88454	117.17	17.5095	0.987445	10.1684	25.707	14.2721	22.8126	15.3973	8.58275	2.85122	17.4624	0	9.42144	4.00529	0.345053	15.7449	18.6772	0.00711662	3.49177	30.9692	15.3153	16.259	37.4615	1.08458	15.6897	0.297663	1.40725	14.9666	4.26242	62.9656	18.2642	15.1828	32.1901	15.1075	13.585	9.85495	2.9172	9.11329	4.82039	36.9049	2.30815	54.5792
4	Miyagi	68	Communication	0.559712	0	0.120108	0.3061	0.914429	0.328312	0.0388333	0.552338	0.151683	0.418144	0.326724	0.324033	0.294234	0.0536465	0.568613	0	0.145769	0.0717727	0.00776029	0.408166	6.35218	0	0.0495656	0.945104	1.32566	0.452078	0.235978	0.0281868	0.245947	0	0.0313691	0.365823	0.017913	1.1398	0.59769	0.937203	0.967427	1.21753	0.759724	0.609542	0.130969	0.46273	0.386109	1.4844	0.131037	2.99501
4	Miyagi	69	Broadcasting	0	0	0	0	0	0	0	0	0	0	0	0	0	0	0	0	0	0	0	0	0	0	0	0	0	0	0	0	0	0	0	0	0	0	0	0	0	0	0	0	0	0	0	0	0	0
4	Miyagi	70	Information services	0.0592595	0	0.00185248	0.0028303	0.13046	0.0557931	0.00093435	0.0136671	0.013752	0.0419476	0.0284867	0.0202465	0.0143216	0.0111149	0.0227721	0	0.0278693	0.0142092	0.000622389	0.0332444	0.205479	0	0.00198762	0.0916688	0.0630889	0.0418897	0.0217162	0.00486906	0.0327583	0.000920415	0.00371388	0.0270828	0.00754243	0.0571772	0.0536831	0.0269025	0.115725	0.0697648	0.117563	0.0406222	0.0119893	0.0853033	0.105297	0.271173	0.0054972	0.476492
4	Miyagi	71	﻿Internet based services	0.000251915	0	8.73247e-05	0.000130518	0.00242085	0.00122542	7.34078e-05	0.00128401	0.000498662	0.00117391	0.000456193	0.00049857	0.000882246	8.45081e-05	0.00105379	0	0.000334002	0.000110006	0	0.000759574	0.0122907	0	4.68476e-05	0.00335903	0.00179815	0.00103711	0.000514703	4.09865e-05	0.000415109	0	4.23557e-05	0.00102297	4.23268e-05	0.00266243	0.00138438	0.00183694	0.00255458	0.0020923	0.00176016	0.000823026	0.000187556	0.00136912	0.00113699	0.00467668	0.000304864	0.0102972
4	Miyagi	72	Image information production and distribution industry	0.0383819	0	0.0179615	0.0165715	0.141066	0.0132501	0.0134213	0.14312	0.0189941	0.0763124	0.0550701	0.0710792	0.0210396	0.111375	0.0931225	0	0.0197194	0.010615	0.00111753	0.0682193	0.301163	0	0.00642396	0.138913	0.220923	0.145373	0.0797275	0.0149873	0.0841174	0.000550883	0.00258133	0.0361595	0.00515915	0.0608474	0.0326593	0.0559754	0.268128	0.0907309	0.101177	0.0432619	0.0245755	0.075907	0.069293	0.396729	0.0209022	0.785581
4	Miyagi	73	Public administration	0	0	0	0	0	0	0	0	0	0	0	0	0	0	0	0	0	0	0	0	0	0	0	0	0	0	0	0	0	0	0	0	0	0	0	0	0	0	0	0	0	0	0	0	0	0
4	Miyagi	74	Education and Research	0.0415771	0	0.00477622	0.0348167	1.00278	0.201415	0.00676216	0.0735359	0.0117232	0.137425	0.0856633	0.0850883	0.00662531	0.176372	0.94646	0	0.386998	0.19317	0.0168915	1.18581	5.21377	0	0.0121373	1.34609	1.16764	1.22453	0.233609	0.0563978	0.373307	0.00624498	0.0280435	0.133105	0.000487381	0.30061	0.491849	0.198592	0.257501	0.492038	0.72388	0.171532	0.200416	1.04487	1.02541	4.69368	0.338098	6.72458
4	Miyagi	75	Medical service, health and social security and nursing care	0.00285852	0	0.00154578	0.00171797	0.0242891	0.00802009	0.000249891	0.00593529	0.00158435	0.00202472	0.00501722	0.00257006	0.00146247	0.00103564	0.00602659	0	0.00267193	0.00104854	0.000199749	0.00604238	0.0237521	0	0.000446534	0.00899691	0.0114609	0.00389764	0.00332904	0.000334858	0.00180876	4.92328e-05	0.00028837	0.00468026	0.000922155	0.0032225	0.00188505	0.00422439	0.0117605	0.0116152	0.0068089	0.0107585	0.00178771	0.00388389	0.00169802	0.0106854	0.000726462	0.0242185
4	Miyagi	76	Advertising and survery	0.0166841	0	0.0115669	0.00613454	2.02342	0.655352	0.00282295	0.0643928	0.0204193	0.126903	0.208869	0.296114	0.0118008	0.0189573	0.105183	0	0.0153418	0.0137878	0.00188042	0.514847	1.14634	0	0.00060052	0.239105	0.249788	0.0375784	0.0271241	0.00998237	0.0345871	0.000617966	0.00452449	0.0328699	0.00397884	0.0288618	0.033965	0.046745	0.0928672	0.100576	0.100848	0.0624209	0.0344602	0.0767005	0.0749102	0.356134	0.0394049	0.857726
4	Miyagi	77	Giids rental and leasing services	7.15589	0	0.967272	1.07637	12.8221	2.04548	0.379851	2.07629	1.74039	3.1511	2.33789	1.75062	1.61891	0.177649	3.49665	0	0.580602	0.764902	0.0474424	1.71957	1.9055	0	1.30298	11.0603	6.35361	5.40009	7.15774	0.437427	5.00079	0.0818531	0.253416	3.53333	0.540709	1.5467	3.7334	2.27071	15.4875	11.4123	11.3203	6.19518	1.42544	11.3648	3.58222	19.675	1.18931	54.948
4	Miyagi	78	Other business services	7.0096	0	0.764073	0.690602	13.438	1.95856	0.106789	2.80472	1.58241	1.83831	1.44739	1.64866	2.1779	0.475475	4.66387	0	1.29152	0.50676	0.0439357	2.15351	4.71659	0	0.314696	8.70533	7.56922	6.99511	3.71808	0.140293	2.48475	0.024752	0.126857	3.88143	0.150313	3.58833	3.13167	3.14907	5.47893	5.0597	3.6885	1.83642	0.733468	2.91107	2.41982	8.92978	0.834816	16.1876
4	Miyagi	79	Personal services	0.105562	0	0.00274443	0	0.0827562	0.0211198	0	0.016991	0.0130599	0.011068	0.0165429	0.00895373	0.00723317	0.00265591	0.02517	0	0.00656062	0.0057621	0	0.0125641	0.0252205	0	0	0.0382826	0.0264525	0.0143414	0.012132	0.00128812	0.0026092	0	0	0.00900193	0.00266049	0.0340896	0.0280698	0.0089804	0.0344079	0.0202328	0.0188584	0.0116397	0.00589449	0.0215142	0.0103742	0.0722436	0.00239531	0.105911
4	Miyagi	80	Activities not elsewhere classified	0	0	0	0	0	0	0	0	0	0	0	0	0	0	0	0	0	0	0	0	0	0	0	0	0	0	0	0	0	0	0	0	0	0	0	0	0	0	0	0	0	0	0	0	0	0
5	Akita	1	Agriculture, forestry and fishery	303.544	0	0.00722264	0.136739	854.985	22.2654	0.0667873	0.150917	95.7078	0.00647294	0	0.011782	0	0.0838761	0.634519	0	1.0912	0	0	0.89277	2.21479	0	0.100744	0	59.2435	0	0	0	0.123601	0	0	0	0	0	0.0221617	0	0	0	0	0	0	0	0	0	0	0
5	Akita	2	Metallic ores	0	0	0	0	0	0	0	0	0	0	0	0	0	0	0	0	0	0	0	0	0	0	0	0	0	0	0	0	0	0	0	0	0	0	0	0	0	0	0	0	0	0	0	0	0	0
5	Akita	3	Non-metallic ores	0.0380185	0	0.0922523	0	0	0	0	0	0	0	0.699071	0.00358302	0	0.828998	5.48357	0	0.424259	0	0	0.297645	0.0552431	0	1.83353	0	0.26945	20.1888	13.0844	0.973203	9.43889	-0.00363779	0	0.135858	0	0.0793697	0.0134792	0.00821415	0.0163189	0	0	0.0621049	0	0	0	0	0	0
5	Akita	4	Coal mining, crude petroleum and natural gas	0	0	0	0	0	0	0	0	0	0	0	0	0	0	0	0	0	0	0	0	0	0	0	0	0	0	0	0	0	0	0	0	0	0	0	0	0	0	0	0	0	0	0	0	0	0
5	Akita	5	Food and Tobacco	41.4843	0	0	0	114.628	9.43481	0	0.46233	0.00864107	0	0.554576	0.00148105	0	0.0123009	0.0613556	0	0.357683	0.00304998	0	0.488806	2.01474	0	0	0.0260971	0	0.0534833	0	0.00681825	0.13811	0	0	0.00170174	0	0	0	0	0	0	0	0	0	0	0	0	0	0
5	Akita	6	Beverage	1.01214	0	0	0	1.63701	2.51322	0	0	0	0	0	0	0	0	0	0	0.01106	0	0	0	0.050349	0	0	0	0	0	0	0	0	0	0	0	0	0	0	0	0	0	0	0	0	0	0	0	0	0
5	Akita	7	Textile products	0.419312	0	0	0	0.0491131	0.00103891	0.763992	19.5566	0.0185663	0.508032	0.319105	1.46662	0.0201625	0.0322046	0	0	0	0	0.0086746	0.00210135	0	0	0	0.133876	2.11557	0.0370693	0.00112727	0	0.074186	0	0	0.00215082	0	0	0.0645517	0.00536418	0.0660728	0.00951732	0.0199758	0.00108152	0	0	0	0.892664	0.165254	0.434969
5	Akita	8	Wearing aparel and other textile products	7.64785	0	0.579321	0.173174	4.38737	0.464548	0.11827	6.56481	0.866427	1.03096	0.984422	0.762766	0.10179	0.448508	0.351545	0	0.292803	0.0486528	0	0.575897	1.00871	0	0.621584	0.468771	0.971736	2.23314	0.471539	0.186452	1.0386	0	0.0160567	0.729061	0.0802287	0.168217	0.88032	0.348184	1.63709	0.861813	0.553523	0.975007	0.120871	1.07408	0.542255	1.20196	0.368384	4.44296
5	Akita	9	Timber and wooden products	6.58523	0	0.112082	0.0781764	3.61959	0.700167	0	0.251542	83.9407	74.6126	0.0180162	2.0386	0.0196934	0.0108467	0	0	0.0107173	0.0188258	0	0.236033	0	0	0	0.776987	0.0294631	2.76876	0.154146	1.53611	1.75822	0	0	1.76465	0	0	3.71421	0.523938	2.57101	0.206575	0.277262	0.105636	0.259987	0.273353	0.0941505	1.10894	0.0880414	2.37416
5	Akita	10	Furniture and fixtures	0.0646628	0	0.103109	0.107207	1.8184	0.0892911	0.0113056	0.364279	0.059733	10.1205	0.183754	0.201105	0.0630148	0.0303688	0.307279	0	0.0985934	0.048944	0	0.348896	0.706858	0	0.00481004	0.943696	0.326038	0.046853	0.105693	0.113623	0.20458	0	0.0173953	0.365512	0	0.0202491	0.192577	0.0461037	0.241473	0.177644	0.147864	0.118305	0.0308114	0.160097	0.195821	1.1516	0.133032	13.5021
5	Akita	11	Pulp, paper, paperboard, building paper	0.439418	0	0	0	10.019	0.0661943	0.0230483	0.332421	1.93971	5.39764	212.772	131.255	38.6923	0	3.59099	0	0	1.71929	0	7.4057	1.55597	0	0	6.52109	2.37043	8.93523	0	0.720653	4.38792	0	0	0	0.0442988	0	0.953454	0.0341781	0.331017	0.193711	0.00837346	0.758005	0	5.35746	0.10748	7.2257	0.390858	7.57909
5	Akita	12	Paper products	11.9947	0	0	0	18.9735	6.38046	0.0389417	0.776746	0.0440888	1.73814	0.198567	2.87658	0.135657	0.301857	0.804988	0	0.180136	0.0492788	0.0233459	3.48369	6.44086	0	0.00331359	1.67095	0.175895	5.176	0.0273042	0.843617	0.607776	0	0	0	0.0718519	0	0.236901	0.00288731	1.41683	0.293136	0.0509311	0.273604	0.111435	0.371218	0.184189	2.16414	0.415096	4.02039
5	Akita	13	Publishing, printing	0.00580714	0	0.0015754	0.00235464	1.15493	0.0615682	0.0041937	0.101192	0.00899622	0.0873008	0.00844107	0.286969	0.537003	0.00508195	0.0365013	0	0.00376602	0.00507172	0.00154378	0.249784	0.0896583	0	0.000845164	0.0208656	0.0234672	0.137208	0.0054166	0.00320417	0.0149777	0.000217429	0.00101883	0.0396168	0.000254535	0.0103773	0.0209469	0.00711888	0.0816876	0.034601	0.0517213	0.0274687	0.0554917	0.0180675	0.0266878	0.0817489	0.0508747	1.06417
5	Akita	14	Chemical fertilizer	57.009	0	0	0	0.0144876	0.0471951	0	0.00576313	0	0	0	0.00607397	0	20.3664	4.80247	0	2.47806	0.381504	0	1.52053	0.626725	0	0	0	0.019576	0.14151	0	0	0.0637204	0	0.0144483	0	0	0.218641	0.00761671	0	0	0	0.00682296	0	0	0	0	0.50022	0	0
5	Akita	15	Basic inorganic chemical products	0.0734831	0	0.00104681	0	1.08749	0.217032	0.128478	0.191997	0.000996295	0.0187631	0.423191	0.0631819	0.000919654	1.3119	13.547	0	2.7787	0.277808	0.00527557	4.639	2.55281	0	0.00449273	0.923037	7.05739	2.6864	0.0205669	0.100231	0.0935518	0.0208046	0.0101549	0.0725966	0.00405918	0.265968	0.0985017	0.203567	0.181796	0.0443753	0.0393229	0.0947147	0.00719471	0.0720324	0.0562779	3.04256	0.0127911	0.936335
5	Akita	16	Basic organic chemical products	0	0	0	0	0.00171804	0	0	0	0	0	0.000764366	0.000110814	0.000835522	0.0319501	0.200549	0	0.588642	0.080556	0.000684707	0.0914328	0.00565132	0	0	0.000344581	0.00273813	0.00839065	0	0	0.00103335	0	0	0	0	0	0	0	0	0.000500816	0	0	0	0	0	0	0	0
5	Akita	17	Organic chemical products	0.00120213	0	0.000250026	0	0.298168	0.040066	0.0287946	0.000386983	0.0135637	0.0210629	0.194317	0.130922	0.00417343	0.0198408	1.37608	0	2.35897	2.9399	0.157715	2.12901	1.41221	0	0.00321919	1.32341	5.44835	0.101911	0.00147368	0.00117351	0.360837	0	0	0	0	0.0251276	0.0626523	0.000935017	0.0081269	0.00115204	0.00114537	0.00754069	0.00579965	0.0121956	0.00315039	0.259633	0.0226949	0.0765474
5	Akita	18	Synthetic resins	0	0	0	0	0	0	0.00015266	0	0.000691351	0.0345034	0.123186	0.0337712	0.00335038	0	0	0	0	0.00198268	0.0166263	0.338871	0	0	0	5.52744	0.0030234	0.25174	0	0	0.0271066	0	0	0	0	0	0.0757821	0.000169783	0.00640879	0	0	0.00479242	0.00187221	0.0346414	0	0.154128	0.024726	0.271765
5	Akita	19	Synthetic fibers	0	0	0	0	0.264995	0	0.1174	0.314824	0.000418419	0.00761737	0.0106002	0.000239052	0	0	0	0	0	0	0	0	0	0	0.00110065	0.00966343	0.00089886	0.0304925	0	0	0.0684081	0	0	0	0	0	0	0	0	0	0	0	0	0	0	0	0	0
5	Akita	20	Final chemical products	6.69551	0	0.0874812	0.00848539	0.732715	0.0441565	0.0859043	0.199507	0.822278	1.0199	1.26557	0.773506	0.915453	0.0591867	0.134529	0	0.564823	0.154089	0.0162564	7.73127	0.999007	0	0.222613	1.00529	0.56982	0.350123	0.193169	0.00218017	0.489454	0	0.001502	0.208225	0.00300196	0.00524523	0.158362	0.251154	0.748443	0.1541	0.231231	0.126958	0.211503	0.221177	0.0955963	1.05549	0.0486495	1.0065
5	Akita	21	Medicaments	0.699998	0	0	0	0.0714262	0	0	0.00420934	0	0	0	0	0	0	0	0	0	0	0	0.0215809	4.75644	0	0	0	0	0	0	0	0	0	0	0	0	0	0	0	0	0	0	0	0	0	0	0	0	0
5	Akita	22	Petroleum refinery products	0.137066	0	0.00564537	0.000592123	0.0872572	0.0196127	0.00592641	0.00290561	0.0103345	0.00268704	0.014784	0.00623482	0.00422397	0.0189254	0.0792993	0	0.0086267	0.00213237	0.000408382	0.0236931	0.0204329	2.99477e-05	0.049588	0.0224473	0.0150057	0.0739121	0.0109323	0.00390481	0.0305082	0.000178943	0.000681277	0.0131127	0.000837924	0.0319657	0.00911688	0.00446986	0.024734	0.00632257	0.0101714	0.00720458	0.00162442	0.00437613	0.000544559	0.0123819	0.00101373	0.00586063
5	Akita	23	Coal products	0	0	3.5983e-05	0	0	0	0	0	1.71232e-05	0	0.000115679	0	0	0.00130584	0.00166742	0	0.0176509	0	0	9.88389e-05	0	0	0	9.12605e-05	0	0	0	0	0.00383151	5.95945e-05	0.000959918	0.010184	1.74412e-05	0.00245827	0.000220818	0.000336412	6.68343e-05	0	4.94516e-05	3.39136e-05	0	4.70131e-05	0	1.63311e-05	0	1.54292e-05
5	Akita	24	Plastic products	4.59946	0	0.0047712	0.0213935	13.3569	7.61548	0.0140378	1.3551	0.649354	3.97449	1.72367	7.87642	3.74312	0.355532	2.09348	0	0.0159679	0	0.0200376	4.87311	8.23838	0	0	104.924	7.15109	2.25526	0.042183	0.0335909	0.260825	0	0	0.0156498	0	0.129305	2.06665	0.142742	0.706741	0.635344	1.00542	1.05675	1.25635	3.09194	0.68134	33.9562	1.89473	35.381
5	Akita	25	Rubber products	1.16999	0	0.159929	0.0906146	0.335534	0.0255516	0.0026361	0.803271	0.0507369	0.266985	0.194065	0.399	0.0854031	0.0546249	0.0514651	0	0.0689663	0.0289693	0	0.232569	0.448947	0	0.0336463	0.363197	12.8238	0.00297944	0.0708522	0	0.307078	0.00779036	0.0669244	0.205717	0.00607989	0.0212464	0.0449026	0.351814	0.334909	1.97953	5.16294	0.77139	0.727402	1.27557	0.442542	1.52855	0.478966	6.53493
5	Akita	26	Glass and glass products	0.128557	0	0	0	2.13127	15.2843	0.0124872	0.235663	0.0282753	10.4438	0	0	0	0	1.50576	0	0.170448	0	0	2.06735	8.35576	0	0	6.53022	0.344927	17.0774	0.0875546	0	0.550781	0	0	0	0	0	1.02553	0.131934	0.903594	0.198491	0.163318	0	0.287141	0.0646935	0.368103	21.1626	0.401912	1.9236
5	Akita	27	Cement and cement products	0.00082207	0	0	0.00340735	0	0	0	0	0	0	0	0	0	0	0	0	0	0	0	0.000782751	0	0	0.00183453	0	0	0	4.33679	0	0.0365747	0	0	0	0	0	0	0	0.0150848	0	0	0	0	0	0	0.001552	0	0
5	Akita	28	Pottery, china and earthenware	0	0	0	0	0.031508	0.00670308	0	0	0	0.133536	0	0	0	0	0.0250168	0	0	0	0	0.00508426	0	0	0	0.0109537	0	0.000879314	0.00909149	0.0712384	0	0	0	0.000867325	0	0	0	0	0.0111733	0.00170573	0.00423964	0	0.000795098	0.144295	0.00233225	0.0504042	0.0016155	0.165879
5	Akita	29	Other ceramic, stone and clay products	0.790174	0	0	0.00658188	0.0269863	0.00239213	0	0	0.00880144	0.048543	0.194306	0.00107753	0.00116063	0.0127849	2.3378	0	0.0240017	0.0399418	0	0.104027	0.150798	0	0.198448	0.0893495	0.0254673	2.40748	1.41849	0.229426	2.98804	0.119246	0.00512627	1.23066	0	1.11438	0.240516	0.163037	0.545971	1.41589	0.238449	0.382254	0.0090799	0.468341	0.0854507	1.96426	0.0357444	0.914299
5	Akita	30	Pig iron and crude steel	0	0	0	0	0	0	0	0	0	0	0	0	0	0	0.0088568	0	0	0	0	0	0	0	0	0	0	0	0	0	-0.000235734	0.235511	0.00505117	1.36449	0.0168258	0	0	-0.00533176	-0.0603312	-0.0141669	-0.033849	-0.00350539	-0.000852083	-0.00691113	0	-0.0425382	0	-0.0267927
5	Akita	31	steel products	0.00550641	0	0.00484532	0.0263344	0	0	0	0.00102265	0.0108999	0.490294	0	0	0	0	0	0	0	0	0	0	0	0	0	0.132197	0.146282	0	0.500214	0	0.0477408	0	2.50783	2.47931	4.09076	0.00945062	0.0297345	2.80901	8.02726	1.83031	1.63447	1.96533	0.0613054	1.18516	0.0754828	1.37902	0.238743	1.51214
5	Akita	32	Cast and forged steel products	0	0	0	0.0046782	0	0	0	0	0	0.143061	0	0	0	0	0	0	0	0	0	0	0	0	0	0	0	0	0.0138365	0.0793309	0.0714185	0	0	1.48279	0	0	0.105644	4.01635	5.04478	10.3147	11.8767	10.8589	0.484029	4.86238	0.485098	1.84959	0.0983461	1.04283
5	Akita	33	Other iron or steel products	0	0	0	0	0	0	0	0	0.0030071	2.79056	0	0	0	0	0.100658	0	0.00151061	0	0	0.00723234	0	0	0	0.0120201	0	0	0.232787	0.00741486	0.126163	0	0	0.315351	0	0	0.0581685	5.84736	19.111	2.13863	2.64152	0.53155	0.107221	1.36365	0.0026541	2.56972	0.747323	0.888752
5	Akita	34	Non-ferrous metals	0	0	0	0	0	0	0	0	0.0122127	0.345001	0.165011	0	-0.180372	0	56.1052	0	0.380371	0	0	10.8326	0	0	0	0.499018	-0.0112439	5.69361	0	1.0841	5.47766	0.425043	0.585054	1.25067	-0.0373184	145.886	723.995	0.287925	39.6716	-0.295629	0.517295	0.6047	-0.0110242	4.14666	0.226361	269.191	0.123196	3.74154
5	Akita	35	Non-ferrous metal products	0	0	0	0.00485796	0.557494	0.0377639	0	0	0.0206227	0.304397	0	0.0243009	0.0475908	0	0.106685	0	0	0	0	0.0987031	0.0686461	0	0	0.169905	0.102054	0.0427192	0	0.00355959	0.0700425	0	0	0.0035537	0	0.0587241	2.6157	1.39326	2.91839	1.08129	0.633302	1.28967	0.0674823	2.0898	0.370408	9.0073	0.411336	5.98405
5	Akita	36	Metal products for construction and architecture	0.0287532	0	0	0.0248286	0	0	0	0	0.0189722	0.375167	0	0	0	0	0	0	0	0	0	0	0	0	0	0	0	0	0.0930169	0	0	0	0	0.0140112	0	0	0.0101943	3.46647	0.962666	0.225035	0	0.291211	0	0	0	0	0	0.076929
5	Akita	37	Other metal products	0.901004	0	0.730263	0.481368	3.261	16.6425	0	0.519929	1.81133	6.454	0.278109	0.137451	0.0454023	0	3.33191	0	1.46317	0.184931	0	2.05322	3.42553	0	0.0747374	0.811126	7.42265	0.629789	1.55836	0.278422	1.12153	0	0	1.48667	0.00217823	0.15985	0.54007	4.47666	23.0042	7.93478	6.8348	4.75008	1.59259	4.29792	1.59115	7.35478	1.4375	26.5208
5	Akita	38	General industrial machinery	0.00342754	0	0.0193496	0.00405903	0	0	0	0	0.000484626	0.0127777	0	0	0	0	0	0	0	0	0	0	0	0	0.000546348	0.450713	0	0.751342	0.000500215	0.0081259	0.0435698	0	0	0.0706261	0.003949	0.00402498	0.00885368	0.015234	0.0794457	7.33388	1.43692	0.268273	0.160549	0.168097	0.0872583	0.0716422	0.161326	0.112228
5	Akita	39	Special industrial machinery	0	0	0	0	0	0	0	0	0	0	0	0	0	0	0	0	0	0	0	0	0	0	0	0	0	0.0969779	0	0	0	0	0	0	0	0	0	0	0	0.78832	81.5418	0.00458092	0.0125271	0.00846715	0.0122486	0.304421	0.029695	0
5	Akita	40	Other general machines	0	0	0.0497859	0.00688996	0	0	0	0	0.00789721	0.658118	0	0	0	0	0	0	0	0	0	0.0139286	0	0	0	0.0888551	0	0.00788374	0.00135854	0.0597166	0.114387	0	0	0.167189	0	0	0.0424338	0.0581823	0.170816	2.01361	2.2883	6.25636	0.115247	1.71893	0.262543	0.171978	0.184674	1.51451
5	Akita	41	Machinery for office and service industry	0	0	0	0	0	0	0	0	0	0	0	0	0	0	0	0	0	0	0	0	0	0	0	0	0	0	0	0	0	0	0	0	0	0	0	0	0	0	0	0	1.81097	0	0	0	0	0
5	Akita	42	Industrial electric equipment	0.0317514	0	0.00165096	0	0	0	0	0	0.00157129	0.0118367	0	0	0	0	0	0	0	0	0	0	0	0	0	0.00139573	0	0	0	0	0	0	0	0	0	0	0.00168859	0.0848935	0.0107327	2.0737	3.11599	0.0637966	0.499268	11.2066	1.01378	0.722325	0.658511	7.37087
5	Akita	43	Applied electric equipment and electric mesuring instruments	0	0	0	0	0	0	0	0	0	0	0	0	0	0	0	0	0	0	0	0	0	0	0	0	0	0	0	0	0	0	0	0	0	0	0	0	0	0.206553	1.05881	0.063956	0.107764	0.302697	3.29923	0	0	0.109335
5	Akita	44	Other electric equipment	0.105568	0	0.0026139	0	0.0355961	0	0	0	0	0.0960457	0	0	0	0	0.00757037	0	0	0	0	0.0358996	0.00252851	0	0	0.00441961	0	0	0	0	0	0	0	0	0	0	0.00534694	0	0.152933	0.0746731	0.34965	0.0960793	0.168424	0.826468	0.548929	24.1182	0.524718	8.95984
5	Akita	45	Household electric and electric applications	0	0	0	0	0	0	0	0	0	0	0	0	0	0	0	0	0	0	0	0	0	0	0	0.000477198	0	0	0	0	0	0	0	0	0	0	0	0	0	0	0	0	0	0	0	0	0.909935	0
5	Akita	46	Communication equipment	0.00175246	0	0	0	0	0.0065998	0	0.00141036	0	0.00163327	0.00146471	0	0.00160106	0	0.00175938	0	0	0	0	0	0.056413	0	0	0.0015407	0.00958134	0.00346306	0.00179028	0	0	0	0	0.00170792	0	0.00823171	0.00186397	0.00340767	0.00338497	0.0537423	0.0166972	0.00171763	0	0	0.0321485	0.013234	0.00159061	19.4424
5	Akita	47	Electric computing equipment and accessory equipment	0	0	0	0	0	0	0	0	0	0	0	0	0	0	0	0	0	0	0	0	0	0	0	0	0	0	0	0	0	0	0	0	0	0	0	0	0	0	0.0298511	0	0	0	0	0	0	0.00544618
5	Akita	48	Semiconductor devices and integrated circuits	0	0	0	0	0	0	0	0	0	0	0	0	0	0	0	0	0	0	0	0	0	0	0	0	0	0	0	0	0	0	0	0	0	0	0	0	0.339516	0.158541	1.68131	0.587777	7.34086	9.51553	37.0503	1.37293	8.6026	279.285
5	Akita	49	Other electrical equipment	0	0	0	0	0.0486285	0.0150869	0	0	0	0	0	0.0271835	0.790555	0	0	0	0	0	0	0	0.0322396	0	0	0.014088	0	0	0	0	0	0	0	0	0	0	0.409054	0	2.94042	5.97375	8.16825	0.973759	26.6573	28.1299	149.178	3.43367	27.6051	1234.92
5	Akita	50	Passenger motor cars	0	0	0	0	0	0	0	0	0	0	0	0	0	0	0	0	0	0	0	0	0	0	0	0	0	0	0	0	0	0	0	0	0	0	0	0	0	0	0	0	0	0	0	0	0	0
5	Akita	51	Other cars	0	0	0	0	0	0	0	0	0	0	0	0	0	0	0	0	0	0	0	0	0	0	0	0	0	0	0	0	0	0	0	0	0	0	0	0	0	0	0	0	0	0	0	0	0	0
5	Akita	52	Motor vheicle parts and accessories	0	0	0	0	0	0	0	0	0	0	0	0	0	0	0	0	0	0	0	0	0	0	0	0	0	0	0	0	0	0	0	0	0	0	0	0	0	0	0.108819	0	0	0	0	0	0	0
5	Akita	53	Other transportation equipment	0.180879	0	0.000159273	0	0	0	0	0	0	0	0	0	0	0	0	0	0	0	0	0	0	0	0	0	0	0	0	0	0	0	0	0	0	0	0	0	0	0	0	0	0	0	0	0	0	0
5	Akita	54	Precision instruments	0.322699	0	0	0.00928846	0.0725399	0	0	0.00721403	0.00887195	0.00835422	0.0973963	0.0152062	0	0	0.0449964	0	0	0	0	0.00853513	0.0541039	0	0	0.157614	0.0163363	0	0.00915733	0.0262516	0.00886248	0	0	0.00873606	0	0	0	0.0261455	0.0173142	1.9758	7.00336	0.0351429	0.400428	1.15297	0.48549	0.0253846	0.016272	20.3774
5	Akita	55	Miscellaneous manufacturing products	0.343537	0	0.130069	0.0241926	0.259787	0.350133	0	2.6963	0.216222	1.17345	0.0250889	0.016974	0.00457074	0.00335662	0.00167424	0	0.0182413	0	0	0.028582	0.0016776	0	0.0111646	0.0571795	0.00759806	0.27682	0.00681458	0.138377	0.224235	0	0	0.394941	0	0.00195834	0.209305	0.0421559	0.057981	0.570549	0.0270117	0.00980705	0	0.0241692	0.0509878	0.039355	0.00605453	0.652909
5	Akita	56	Reuse and recycling	0.0768923	0	0	0	0.0294307	1.93117	0	0	0	0	1.29055	0	0	0.570965	0.400585	0	0.0909265	0	0	0	0	0	0	4.14741	0.0284053	0.850087	0.201687	0.0791196	0.117116	0.29887	0.00419296	2.34333	0.0796119	3.39461	5.69622	0	0.0040141	0	0	0	0	0	0	0.0235405	0	0
5	Akita	57	Building construction and repair of construction	0	0	0	0	0	0	0	0	0	0	0	0	0	0	0	0	0	0	0	0	0	0	0	0	0	0	0	0	0	0	0	0	0	0	0	0	0	0	0	0	0	0	0	0	0	0
5	Akita	58	Public construction	0	0	0	0	0	0	0	0	0	0	0	0	0	0	0	0	0	0	0	0	0	0	0	0	0	0	0	0	0	0	0	0	0	0	0	0	0	0	0	0	0	0	0	0	0	0
5	Akita	59	Other civil enginnering and construction	0	0	0	0	0	0	0	0	0	0	0	0	0	0	0	0	0	0	0	0	0	0	0	0	0	0	0	0	0	0	0	0	0	0	0	0	0	0	0	0	0	0	0	0	0	0
5	Akita	60	Electricity	7.59027	0	1.16914	1.88547	14.9419	3.30087	0.502768	1.96907	3.21915	1.68977	15.3738	1.67841	1.75738	1.66444	18.4634	0	5.83847	0.922276	0.522223	4.36851	2.50377	0	0.474943	13.7547	8.42056	7.77572	1.50368	0.371115	5.61546	0.733111	0.416291	17.5846	0.596168	14.3048	7.6136	1.47214	13.4623	3.37234	3.09895	3.37258	1.03056	1.91602	0.559169	10.183	0.569189	5.52898
5	Akita	61	Gas supply and heat supply	0	0	0	0	0	0	0	0	0	0	0	0	0	0	0	0	0	0	0	0	0	0	0	0	0	0	0	0	0	0	0	0	0	0	0	0	0	0	0	0	0	0	0	0	0	0
5	Akita	62	Water supply and waste management services	0	0	0	0	0	0	0	0	0	0	0	0	0	0	0	0	0	0	0	0	0	0	0	0	0	0	0	0	0	0	0	0	0	0	0	0	0	0	0	0	0	0	0	0	0	0
5	Akita	63	Commerce	41.7084	0	1.24525	0.382999	122.539	10.8252	0.905261	17.7199	14.3246	17.0359	28.9547	17.1392	7.52949	1.99207	13.3495	0	11.8768	3.67626	0.237469	17.0791	14.9342	0	2.26658	50.4132	28.2052	12.7398	6.55013	0.924409	6.88888	0.157834	1.06623	10.7679	4.94257	16.7662	14.4355	9.94624	25.5275	18.3431	18.8539	9.51479	5.4637	13.5469	10.4629	41.5251	5.05989	109.583
5	Akita	64	Financial and insurance	0.0235476	0	0.0047117	0.0017498	0.024729	0.00450056	0.00119006	0.0110477	0.0047363	0.00598529	0.0053806	0.00462305	0.00263931	0.00173604	0.00754287	0	0.00384919	0.00213732	0.000113462	0.0114531	0.00578087	0	0.00018552	0.00523493	0.00706876	0.00938457	0.0063855	0.000684744	0.00383739	9.84381e-05	0.000456021	0.00340793	0.00088523	0.0128132	0.0110363	0.00456672	0.00760734	0.00568147	0.00586145	0.00477174	0.000543126	0.00211319	0.00142067	0.0119625	0.000801714	0.0217558
5	Akita	65	Real estate agencies and rental services	0	0	0	0	0	0	0	0	0	0	0	0	0	0	0	0	0	0	0	0	0	0	0	0	0	0	0	0	0	0	0	0	0	0	0	0	0	0	0	0	0	0	0	0	0	0
5	Akita	66	House rent	0	0	0	0	0	0	0	0	0	0	0	0	0	0	0	0	0	0	0	0	0	0	0	0	0	0	0	0	0	0	0	0	0	0	0	0	0	0	0	0	0	0	0	0	0	0
5	Akita	67	Transport	20.5568	0	4.55535	0.413641	16.8021	2.51085	0.141599	1.45814	3.68637	2.04662	3.27131	2.20796	1.23076	0.408864	2.50411	0	1.35103	0.574357	0.0494804	2.25781	2.6783	0.00102052	0.500718	4.44096	2.19621	2.33153	5.37196	0.155529	2.24989	0.0426847	0.201798	2.1462	0.611228	9.02924	2.61907	2.17721	4.61605	2.1664	1.94809	1.4132	0.418325	1.30684	0.691242	5.29214	0.330987	7.82663
5	Akita	68	Communication	0.0529723	0	0.0113673	0.0289699	0.0865433	0.0310721	0.00367526	0.0522743	0.0143556	0.039574	0.0309218	0.0306671	0.0278468	0.00507721	0.0538146	0	0.0137959	0.00679271	0.000734449	0.0386296	0.601183	0	0.00469098	0.0894465	0.125463	0.0427856	0.0223334	0.00266766	0.0232769	0	0.00296883	0.0346222	0.00169532	0.107873	0.0565665	0.0886987	0.0915592	0.115229	0.0719017	0.0576883	0.0123951	0.0437937	0.0365421	0.140487	0.0124015	0.283454
5	Akita	69	Broadcasting	0	0	0	0	0	0	0	0	0	0	0	0	0	0	0	0	0	0	0	0	0	0	0	0	0	0	0	0	0	0	0	0	0	0	0	0	0	0	0	0	0	0	0	0	0	0
5	Akita	70	Information services	0.00806548	0	0.000252131	0.000385217	0.0177562	0.00759369	0.000127169	0.00186015	0.00187171	0.00570925	0.00387717	0.00275564	0.00194923	0.00151279	0.00309938	0	0.00379314	0.00193394	8.47099e-05	0.00452472	0.0279666	0	0.000270524	0.0124765	0.00858668	0.00570138	0.00295567	0.000662701	0.00445855	0.000125273	0.000505476	0.00368608	0.00102656	0.00778207	0.00730651	0.00366155	0.0157506	0.0094953	0.0160008	0.00552887	0.0016318	0.0116102	0.0143314	0.0369079	0.000748194	0.0648527
5	Akita	71	﻿Internet based services	1.86945e-05	0	6.48034e-06	9.68572e-06	0.000179651	9.09383e-05	5.44757e-06	9.52858e-05	3.70056e-05	8.71152e-05	3.38539e-05	3.69987e-05	6.54712e-05	6.27132e-06	7.82014e-05	0	2.47862e-05	8.16351e-06	0	5.63678e-05	0.000912089	0	3.47655e-06	0.000249272	0.00013344	7.69635e-05	3.81959e-05	3.04159e-06	3.08051e-05	0	3.1432e-06	7.59141e-05	3.14106e-06	0.000197578	0.000102734	0.000136318	0.000189575	0.000155269	0.000130621	6.10765e-05	1.39185e-05	0.000101602	8.43756e-05	0.000347055	2.26239e-05	0.000764148
5	Akita	72	Image information production and distribution industry	0.000157118	0	7.35266e-05	6.78365e-05	0.000577462	5.42402e-05	5.4941e-05	0.000585872	7.77535e-05	0.000312389	0.000225432	0.000290967	8.61267e-05	0.000455919	0.000381202	0	8.07224e-05	4.34533e-05	4.57466e-06	0.00027926	0.00123283	0	2.62969e-05	0.000568647	0.000904361	0.000595094	0.000326369	6.13515e-05	0.00034434	2.25507e-06	1.05668e-05	0.000148021	2.11193e-05	0.000249082	0.000133693	0.000229138	0.0010976	0.000371412	0.000414172	0.000177095	0.000100601	0.00031073	0.000283655	0.00162403	8.55643e-05	0.00321582
5	Akita	73	Public administration	0	0	0	0	0	0	0	0	0	0	0	0	0	0	0	0	0	0	0	0	0	0	0	0	0	0	0	0	0	0	0	0	0	0	0	0	0	0	0	0	0	0	0	0	0	0
5	Akita	74	Education and Research	0.0010996	0	0.000126318	0.000920806	0.0265208	0.00532686	0.00017884	0.00194482	0.000310045	0.00363451	0.00226556	0.00225035	0.000175221	0.00466455	0.0250312	0	0.010235	0.00510881	0.000446734	0.0313615	0.13789	0	0.000320999	0.0356003	0.0308809	0.0323855	0.00617831	0.00149156	0.00987293	0.000165162	0.000741674	0.00352025	1.28899e-05	0.0079503	0.013008	0.00525221	0.00681018	0.013013	0.0191446	0.00453655	0.00530044	0.0276339	0.0271192	0.124135	0.00894176	0.177846
5	Akita	75	Medical service, health and social security and nursing care	4.74852e-06	0	2.56783e-06	2.85387e-06	4.03486e-05	1.33229e-05	4.15115e-07	9.85962e-06	2.6319e-06	3.36343e-06	8.33453e-06	4.26934e-06	2.42944e-06	1.72039e-06	1.00113e-05	0	4.43857e-06	1.74181e-06	3.31819e-07	1.00375e-05	3.94566e-05	0	7.41774e-07	1.49455e-05	1.90387e-05	6.4747e-06	5.53014e-06	5.5626e-07	3.00468e-06	8.17848e-08	4.79036e-07	7.77477e-06	1.53187e-06	5.35317e-06	3.13142e-06	7.01749e-06	1.95364e-05	1.92949e-05	1.13108e-05	1.78719e-05	2.96972e-06	6.45186e-06	2.82072e-06	1.77504e-05	1.20679e-06	4.02313e-05
5	Akita	76	Advertising and survery	0	0	0	0	0	0	0	0	0	0	0	0	0	0	0	0	0	0	0	0	0	0	0	0	0	0	0	0	0	0	0	0	0	0	0	0	0	0	0	0	0	0	0	0	0	0
5	Akita	77	Giids rental and leasing services	0.0008437	0	0.000114044	0.000126907	0.00151176	0.000241168	4.47855e-05	0.000244801	0.000205197	0.000371524	0.000275644	0.000206404	0.000190874	2.09453e-05	0.000412265	0	6.84546e-05	9.01842e-05	5.59359e-06	0.000202742	0.000224664	0	0.000153625	0.00130405	0.000749109	0.000636686	0.000843918	5.15739e-05	0.000589608	9.65072e-06	2.98785e-05	0.00041659	6.37511e-05	0.000182361	0.000440179	0.000267723	0.00182602	0.00134554	0.0013347	0.00073043	0.000168064	0.00133994	0.000422354	0.00231974	0.000140223	0.00647853
5	Akita	78	Other business services	0	0	0	0	0	0	0	0	0	0	0	0	0	0	0	0	0	0	0	0	0	0	0	0	0	0	0	0	0	0	0	0	0	0	0	0	0	0	0	0	0	0	0	0	0	0
5	Akita	79	Personal services	0.0555776	0	0.00144492	0	0.0435705	0.0111194	0	0.00894565	0.00687596	0.00582724	0.00870973	0.00471407	0.00380821	0.00139832	0.0132518	0	0.00345412	0.0030337	0	0.00661492	0.0132784	0	0	0.0201555	0.0139271	0.00755066	0.00638742	0.000678186	0.00137372	0	0	0.00473945	0.00140073	0.0179479	0.0147785	0.00472811	0.0181155	0.0106524	0.00992883	0.00612821	0.00310341	0.0113271	0.00546192	0.0380357	0.00126111	0.0557616
5	Akita	80	Activities not elsewhere classified	0	0	0	0	0	0	0	0	0	0	0	0	0	0	0	0	0	0	0	0	0	0	0	0	0	0	0	0	0	0	0	0	0	0	0	0	0	0	0	0	0	0	0	0	0	0
6	Yamagata	1	Agriculture, forestry and fishery	356.878	0	0.00849169	0.160765	1005.21	26.1775	0.078522	0.177433	112.524	0.00761026	0	0.0138521	0	0.0986135	0.746006	0	1.28293	0	0	1.04963	2.60393	0	0.118445	0	69.6527	0	0	0	0.145319	0	0	0	0	0	0.0260556	0	0	0	0	0	0	0	0	0	0	0
6	Yamagata	2	Metallic ores	0	0	0	0	0	0	0	0	0	0	0	0	0	0	0	0	0	0	0	0	0	0	0	0	0	0	0	0	0	0	0	0	0	0	0	0	0	0	0	0	0	0	0	0	0	0
6	Yamagata	3	Non-metallic ores	0.0108306	0	0.0262805	0	0	0	0	0	0	0	0.199149	0.00102072	0	0.236162	1.56214	0	0.120862	0	0	0.0847923	0.0157375	0	0.52233	0	0.07676	5.75133	3.72745	0.277243	2.68892	-0.00103632	0	0.0387029	0	0.0226106	0.00383992	0.00234002	0.00464887	0	0	0.0176922	0	0	0	0	0	0
6	Yamagata	4	Coal mining, crude petroleum and natural gas	0	0	0	0	0	0	0	0	0	0	0	0	0	0	0	0	0	0	0	0	0	0	0	0	0	0	0	0	0	0	0	0	0	0	0	0	0	0	0	0	0	0	0	0	0	0
6	Yamagata	5	Food and Tobacco	123.312	0	0	0	340.73	28.0449	0	1.37427	0.0256855	0	1.64847	0.00440242	0	0.0365644	0.182379	0	1.06321	0.00906605	0	1.45297	5.9888	0	0	0.0775735	0	0.158979	0	0.0202672	0.41053	0	0	0.00505842	0	0	0	0	0	0	0	0	0	0	0	0	0	0
6	Yamagata	6	Beverage	1.4464	0	0	0	2.33937	3.59153	0	0	0	0	0	0	0	0	0	0	0.0158053	0	0	0	0.0719515	0	0	0	0	0	0	0	0	0	0	0	0	0	0	0	0	0	0	0	0	0	0	0	0	0
6	Yamagata	7	Textile products	2.71856	0	0	0	0.318419	0.00673563	4.95325	126.793	0.120373	3.29376	2.06888	9.50869	0.130721	0.208795	0	0	0	0	0.0562408	0.0136239	0	0	0	0.867969	13.716	0.240335	0.0073085	0	0.480976	0	0	0.0139446	0	0	0.418513	0.034778	0.428375	0.0617044	0.129511	0.00701192	0	0	0	5.78748	1.07141	2.82007
6	Yamagata	8	Wearing aparel and other textile products	10.5159	0	0.796571	0.238116	6.03266	0.638757	0.162622	9.02666	1.19134	1.41758	1.35359	1.04881	0.139962	0.616702	0.483377	0	0.402606	0.0668979	0	0.791862	1.38699	0	0.854682	0.644564	1.33614	3.07059	0.648369	0.256372	1.42809	0	0.022078	1.00246	0.110315	0.2313	1.21045	0.478755	2.25101	1.185	0.761098	1.34064	0.166199	1.47687	0.745604	1.6527	0.506531	6.10911
6	Yamagata	9	Timber and wooden products	1.2412	0	0.0211255	0.0147349	0.682229	0.131969	0	0.0474112	15.8214	14.0632	0.00339574	0.38424	0.00371185	0.00204441	0	0	0.00202003	0.00354833	0	0.0444881	0	0	0	0.146448	0.00555328	0.521863	0.0290538	0.289529	0.331394	0	0	0.332606	0	0	0.700063	0.0987531	0.484591	0.0389358	0.0522591	0.0199105	0.0490031	0.0515222	0.0177457	0.209017	0.0165943	0.447487
6	Yamagata	10	Furniture and fixtures	0.181062	0	0.288714	0.300189	5.0917	0.250024	0.0316568	1.02002	0.167258	28.3383	0.514528	0.563112	0.176447	0.0850354	0.860411	0	0.276071	0.137048	0	0.976943	1.97927	0	0.0134686	2.64244	0.912937	0.131193	0.295951	0.318154	0.572844	0	0.0487085	1.02347	0	0.0566993	0.539233	0.129095	0.676147	0.497419	0.414033	0.331265	0.0862748	0.448286	0.548317	3.2246	0.372502	37.807
6	Yamagata	11	Pulp, paper, paperboard, building paper	0.0584284	0	0	0	1.3322	0.0088017	0.00306468	0.0442012	0.257918	0.717711	28.2918	17.4526	5.14483	0	0.477486	0	0	0.22861	0	0.984718	0.206894	0	0	0.867094	0.31519	1.1881	0	0.0958235	0.583452	0	0	0	0.0058903	0	0.126778	0.00454458	0.0440145	0.0257573	0.0011134	0.10079	0	0.712369	0.0142914	0.960784	0.0519714	1.00777
6	Yamagata	12	Paper products	9.18862	0	0	0	14.5348	4.88781	0.0298317	0.595034	0.0337746	1.33152	0.152114	2.20363	0.103922	0.23124	0.616669	0	0.137995	0.0377505	0.0178843	2.66871	4.93409	0	0.00253841	1.28005	0.134746	3.96513	0.0209166	0.646261	0.465593	0	0	0	0.0550429	0	0.18148	0.00221185	1.08538	0.22456	0.0390163	0.209597	0.0853659	0.284375	0.1411	1.65786	0.317989	3.07986
6	Yamagata	13	Publishing, printing	0.0637906	0	0.0173055	0.0258654	12.6868	0.676318	0.0460673	1.11158	0.0988222	0.958988	0.092724	3.15232	5.89891	0.0558245	0.400962	0	0.0413692	0.0557121	0.0169582	2.74384	0.984884	0	0.00928401	0.229206	0.257784	1.50721	0.0595006	0.0351974	0.164528	0.00238843	0.0111918	0.435186	0.00279603	0.113993	0.230099	0.0782	0.897327	0.380087	0.568151	0.30174	0.609568	0.198469	0.293161	0.898	0.558851	11.6897
6	Yamagata	14	Chemical fertilizer	2.01371	0	0	0	0.000511742	0.00166706	0	0.000203569	0	0	0	0.000214549	0	0.719396	0.169636	0	0.0875318	0.0134757	0	0.0537092	0.0221376	0	0	0	0.000691477	0.00499852	0	0	0.00225077	0	0.000510351	0	0	0.00772298	0.000269042	0	0	0	0.000241005	0	0	0	0	0.0176691	0	0
6	Yamagata	15	Basic inorganic chemical products	0.118183	0	0.0016836	0	1.74902	0.349053	0.206631	0.30879	0.00160235	0.0301768	0.68062	0.101616	0.00147908	2.10993	21.7877	0	4.46899	0.4468	0.00848473	7.46093	4.1057	0	0.00722568	1.48452	11.3504	4.32056	0.0330778	0.161203	0.15046	0.0334602	0.0163321	0.116757	0.0065284	0.427757	0.158421	0.327398	0.292383	0.071369	0.0632432	0.15233	0.0115713	0.11585	0.0905119	4.89337	0.020572	1.50591
6	Yamagata	16	Basic organic chemical products	0	0	0	0	2.07858e-05	0	0	0	0	0	9.24769e-06	1.34069e-06	1.01086e-05	0.000386548	0.00242634	0	0.00712168	0.000974607	8.28393e-06	0.0011062	6.83725e-05	0	0	4.16891e-06	3.31273e-05	0.000101514	0	0	1.2502e-05	0	0	0	0	0	0	0	0	6.05913e-06	0	0	0	0	0	0	0	0
6	Yamagata	17	Organic chemical products	0.00263959	0	0.000548999	0	0.654709	0.0879757	0.0632262	0.000849726	0.0297827	0.0462493	0.426674	0.287474	0.0091639	0.0435659	3.02155	0	5.17975	6.45534	0.346306	4.67481	3.10089	0	0.0070686	2.9059	11.9633	0.223772	0.00323587	0.00257677	0.792315	0	0	0	0	0.0551745	0.13757	0.00205308	0.0178448	0.00252962	0.00251497	0.0165576	0.0127347	0.0267788	0.00691752	0.570094	0.0498327	0.16808
6	Yamagata	18	Synthetic resins	0	0	0	0	0	0	5.24102e-05	0	0.00023735	0.0118455	0.0422914	0.0115941	0.00115023	0	0	0	0	0.000680679	0.00570803	0.116339	0	0	0	1.89764	0.00103797	0.0864258	0	0	0.00930605	0	0	0	0	0	0.026017	5.82889e-05	0.00220022	0	0	0.0016453	0.000642756	0.0118928	0	0.0529141	0.00848878	0.0933005
6	Yamagata	19	Synthetic fibers	0	0	0	0	0	0	0	0	0	0	0	0	0	0	0	0	0	0	0	0	0	0	0	0	0	0	0	0	0	0	0	0	0	0	0	0	0	0	0	0	0	0	0	0	0	0
6	Yamagata	20	Final chemical products	50.723	0	0.662728	0.0642825	5.5508	0.334515	0.650782	1.5114	6.2293	7.72644	9.58752	5.85982	6.93516	0.448379	1.01915	0	4.27891	1.16733	0.123153	58.5695	7.56814	0	1.68645	7.61575	4.31676	2.65241	1.46339	0.0165163	3.70794	0	0.0113787	1.57744	0.0227418	0.0397361	1.1997	1.90266	5.66996	1.16741	1.75173	0.961795	1.60228	1.67557	0.724206	7.99605	0.368552	7.62489
6	Yamagata	21	Medicaments	4.77368	0	0	0	0.487095	0	0	0.0287059	0	0	0	0	0	0	0	0	0	0	0	0.147172	32.4368	0	0	0	0	0	0	0	0	0	0	0	0	0	0	0	0	0	0	0	0	0	0	0	0	0
6	Yamagata	22	Petroleum refinery products	0.213744	0	0.00880355	0.000923373	0.136071	0.0305846	0.00924181	0.0045311	0.0161159	0.00419025	0.0230546	0.00972275	0.00658698	0.0295128	0.123662	0	0.0134527	0.00332527	0.000636843	0.0369476	0.0318636	4.67012e-05	0.0773289	0.035005	0.0234004	0.115261	0.0170481	0.00608928	0.0475754	0.000279049	0.0010624	0.0204482	0.00130668	0.0498482	0.0142171	0.00697043	0.038571	0.00985959	0.0158615	0.011235	0.00253316	0.00682425	0.000849201	0.0193086	0.00158085	0.00913922
6	Yamagata	23	Coal products	0	0	8.10922e-05	0	0	0	0	0	3.85893e-05	0	0.000260698	0	0	0.00294287	0.00375774	0	0.0397785	0	0	0.000222746	0	0	0	0.000205667	0	0	0	0	0.00863478	0.000134304	0.0021633	0.0229509	3.93058e-05	0.00554002	0.000497641	0.000758147	0.000150619	0	0.000111445	7.64285e-05	0	0.00010595	0	3.68042e-05	0	3.47717e-05
6	Yamagata	24	Plastic products	10.1783	0	0.0105584	0.0473427	29.558	16.8526	0.031065	2.99875	1.43698	8.79534	3.8144	17.4301	8.28331	0.786773	4.63275	0	0.035336	0	0.0443421	10.7839	18.2311	0	0	232.191	15.825	4.99077	0.0933487	0.0743349	0.577192	0	0	0.0346322	0	0.286145	4.57338	0.31588	1.56398	1.40598	2.22494	2.33852	2.78024	6.84229	1.50777	75.1433	4.19294	78.2962
6	Yamagata	25	Rubber products	0.00336254	0	0.000459633	0.000260424	0.000964316	7.34346e-05	7.5761e-06	0.00230858	0.000145817	0.000767308	0.000557738	0.00114672	0.000245447	0.000156991	0.00014791	0	0.000198208	8.32572e-05	0	0.000668398	0.00129027	0	9.66988e-05	0.00104382	0.0368554	8.56284e-06	0.000203628	0	0.000882536	2.23893e-05	0.000192339	0.000591226	1.74735e-05	6.10617e-05	0.000129049	0.00101111	0.000962522	0.00568912	0.0148382	0.00221696	0.00209054	0.00366597	0.00127186	0.00439302	0.00137654	0.0187812
6	Yamagata	26	Glass and glass products	0.706914	0	0	0	11.7194	84.0458	0.0686648	1.29587	0.155481	57.4285	0	0	0	0	8.27991	0	0.937265	0	0	11.368	45.9468	0	0	35.9085	1.89669	93.9056	0.481447	0	3.02864	0	0	0	0	0	5.63922	0.725483	4.9687	1.09147	0.898053	0	1.57894	0.355738	2.02413	116.369	2.21004	10.5775
6	Yamagata	27	Cement and cement products	0.000824062	0	0	0.0034156	0	0	0	0	0	0	0	0	0	0	0	0	0	0	0	0.000784647	0	0	0.00183897	0	0	0	4.3473	0	0.0366633	0	0	0	0	0	0	0	0.0151213	0	0	0	0	0	0	0.00155576	0	0
6	Yamagata	28	Pottery, china and earthenware	0	0	0	0	0.00843286	0.00179402	0	0	0	0.0357398	0	0	0	0	0.00669554	0	0	0	0	0.00136076	0	0	0	0.00293166	0	0.000235341	0.00243326	0.0190664	0	0	0	0.000232132	0	0	0	0	0.00299045	0.000456525	0.0011347	0	0.000212801	0.0386193	0.000624209	0.0134903	0.000432375	0.0443961
6	Yamagata	29	Other ceramic, stone and clay products	3.34407	0	0	0.027855	0.114208	0.0101237	0	0	0.0372483	0.205437	0.822317	0.00456017	0.00491185	0.0541067	9.89372	0	0.101577	0.169037	0	0.440249	0.638188	0	0.839844	0.378133	0.107779	10.1886	6.00314	0.970946	12.6456	0.504656	0.0216947	5.20824	0	4.71615	1.01788	0.689983	2.31059	5.99216	1.00913	1.61773	0.0384267	1.98205	0.361633	8.3129	0.151273	3.86938
6	Yamagata	30	Pig iron and crude steel	0	0	0	0	0	0	0	0	0	0	0	0	0	0	0	0	0	0	0	0	0	0	0	0	0	0	0	0	0	0	0	0	0	0	0	0	0	0	0	0	0	0	0	0	0	0
6	Yamagata	31	steel products	0.000113943	0	0.000100263	0.000544932	0	0	0	2.11615e-05	0.000225548	0.0101455	0	0	0	0	0	0	0	0	0	0	0	0	0	0.00273553	0.00302698	0	0.0103508	0	0.000987888	0	0.051894	0.0513036	0.084649	0.000195559	0.000615288	0.0581261	0.166106	0.0378741	0.0338217	0.040668	0.00126858	0.0245243	0.00156195	0.0285358	0.00494025	0.0312904
6	Yamagata	32	Cast and forged steel products	0	0	0	0.00530179	0	0	0	0	0	0.16213	0	0	0	0	0	0	0	0	0	0	0	0	0	0	0	0	0.0156808	0.0899053	0.0809383	0	0	1.68044	0	0	0.119726	4.55172	5.71722	11.6896	13.4598	12.3064	0.548547	5.51051	0.549759	2.09613	0.111455	1.18183
6	Yamagata	33	Other iron or steel products	0	0	0	0	0	0	0	0	0.00354211	3.28705	0	0	0	0	0.118567	0	0.00177937	0	0	0.0085191	0	0	0	0.0141586	0	0	0.274204	0.00873409	0.14861	0	0	0.371457	0	0	0.0685177	6.8877	22.5111	2.51912	3.11149	0.626121	0.126297	1.60627	0.00312631	3.02692	0.880284	1.04688
6	Yamagata	34	Non-ferrous metals	0	0	0	0	0	0	0	0	0.00387687	0.109519	0.0523819	0	-0.0572582	0	17.8103	0	0.120747	0	0	3.43877	0	0	0	0.158411	-0.00356932	1.80741	0	0.344143	1.73886	0.134928	0.185723	0.397019	-0.0118466	46.3109	229.829	0.0914006	12.5936	-0.0938462	0.164213	0.191959	-0.00349959	1.31634	0.0718572	85.4536	0.039108	1.18773
6	Yamagata	35	Non-ferrous metal products	0	0	0	0.0515206	5.91244	0.400501	0	0	0.218712	3.22826	0	0.257721	0.504719	0	1.13144	0	0	0	0	1.04679	0.728019	0	0	1.80191	1.08232	0.453054	0	0.0377508	0.742829	0	0	0.0376884	0	0.622792	27.7406	14.7761	30.9507	11.4675	6.71642	13.6774	0.715676	22.1632	3.92832	95.526	4.36238	63.4632
6	Yamagata	36	Metal products for construction and architecture	0.0247154	0	0	0.021342	0	0	0	0	0.016308	0.322482	0	0	0	0	0	0	0	0	0	0	0	0	0	0	0	0	0.0799545	0	0	0	0	0.0120436	0	0	0.00876269	2.97967	0.827479	0.193433	0	0.250316	0	0	0	0	0	0.0661258
6	Yamagata	37	Other metal products	1.91979	0	1.55598	1.02566	6.94827	35.4606	0	1.10782	3.85943	13.7517	0.592572	0.29287	0.0967396	0	7.09937	0	3.1176	0.394036	0	4.37484	7.29885	0	0.159244	1.72828	15.8156	1.3419	3.32043	0.593238	2.38966	0	0	3.16768	0.0046412	0.340596	1.15074	9.53849	49.0155	16.9068	14.563	10.1211	3.39335	9.15767	3.39029	15.671	3.06292	56.5083
6	Yamagata	38	General industrial machinery	0.0239556	0	0.135238	0.0283692	0	0	0	0	0.00338713	0.0893054	0	0	0	0	0	0	0	0	0	0	0	0	0.00381852	3.15011	0	5.25125	0.00349609	0.0567932	0.304517	0	0	0.493618	0.0276002	0.0281313	0.0618799	0.106473	0.555259	51.2577	10.0428	1.87501	1.12211	1.17485	0.609863	0.50072	1.12754	0.784377
6	Yamagata	39	Special industrial machinery	0	0	0	0	0	0	0	0	0	0	0	0	0	0	0	0	0	0	0	0	0	0	0	0	0	0.254795	0	0	0	0	0	0	0	0	0	0	0	2.0712	214.239	0.0120357	0.0329132	0.0222462	0.0321813	0.799821	0.0780194	0
6	Yamagata	40	Other general machines	0	0	0.126948	0.0175685	0	0	0	0	0.0201369	1.67812	0	0	0	0	0	0	0	0	0	0.0355161	0	0	0	0.226569	0	0.0201025	0.0034641	0.15227	0.291673	0	0	0.426312	0	0	0.108201	0.148358	0.435559	5.13444	5.83489	15.9529	0.293865	4.38306	0.669451	0.438523	0.470895	3.86181
6	Yamagata	41	Machinery for office and service industry	0	0	0	0	0	0	0	0	0	0	0	0	0	0	0	0	0	0	0	0	0	0	0	0	0	0	0	0	0	0	0	0	0	0	0	0	0	0	0	0	22.115	0	0	0	0	0
6	Yamagata	42	Industrial electric equipment	0.250179	0	0.0130085	0	0	0	0	0	0.0123807	0.0932657	0	0	0	0	0	0	0	0	0	0	0	0	0	0.0109974	0	0	0	0	0	0	0	0	0	0	0.0133049	0.668904	0.0845662	16.3394	24.5519	0.502675	3.9339	88.3003	7.98788	5.69144	5.18863	58.0775
6	Yamagata	43	Applied electric equipment and electric mesuring instruments	0	0	0	0	0	0	0	0	0	0	0	0	0	0	0	0	0	0	0	0	0	0	0	0	0	0	0	0	0	0	0	0	0	0	0	0	0	0.210224	1.07763	0.0650929	0.10968	0.308078	3.35787	0	0	0.111279
6	Yamagata	44	Other electric equipment	0.490814	0	0.0121527	0	0.165496	0	0	0	0	0.446541	0	0	0	0	0.0351966	0	0	0	0	0.166907	0.0117557	0	0	0.0205479	0	0	0	0	0	0	0	0	0	0	0.0248593	0	0.711025	0.347174	1.62561	0.446697	0.783046	3.84246	2.55211	112.132	2.43955	41.6566
6	Yamagata	45	Household electric and electric applications	0	0	0	0	0	0	0	0	0	0	0	0	0	0	0	0	0	0	0	0	0	0	0	0.00126938	0	0	0	0	0	0	0	0	0	0	0	0	0	0	0	0	0	0	0	0	2.42048	0
6	Yamagata	46	Communication equipment	0.0217787	0	0	0	0	0.0820189	0	0.0175272	0	0.0202975	0.0182027	0	0.0198972	0	0.0218647	0	0	0	0	0	0.701073	0	0	0.019147	0.119072	0.0430372	0.0222487	0	0	0	0	0.0212252	0	0.102299	0.0231645	0.0423488	0.0420667	0.667883	0.207505	0.0213458	0	0	0.399525	0.164466	0.0197672	241.621
6	Yamagata	47	Electric computing equipment and accessory equipment	0	0	0	0	0	0	0	0	0	0	0	0	0	0	0	0	0	0	0	0	0	0	0	0	0	0	0	0	0	0	0	0	0	0	0	0	0	0	2.60992	0	0	0	0	0	0	0.476166
6	Yamagata	48	Semiconductor devices and integrated circuits	0	0	0	0	0	0	0	0	0	0	0	0	0	0	0	0	0	0	0	0	0	0	0	0	0	0	0	0	0	0	0	0	0	0	0	0	0.381349	0.178076	1.88848	0.6602	8.24536	10.688	41.6155	1.54209	9.66256	313.696
6	Yamagata	49	Other electrical equipment	0	0	0	0	0.0347871	0.0107927	0	0	0	0	0	0.0194461	0.565535	0	0	0	0	0	0	0	0.0230631	0	0	0.010078	0	0	0	0	0	0	0	0	0	0	0.292623	0	2.10347	4.27341	5.84328	0.696593	19.0697	20.1231	106.717	2.45632	19.7477	883.421
6	Yamagata	50	Passenger motor cars	0	0	0	0	0	0	0	0	0	0	0	0	0	0	0	0	0	0	0	0	0	0	0	0	0	0	0	0	0	0	0	0	0	0	0	0	0	0	0	0	0	0	0	0	0	0
6	Yamagata	51	Other cars	0	0	0	0	0	0	0	0	0	0	0	0	0	0	0	0	0	0	0	0	0	0	0	0	0	0	0	0	0	0	0	0	0	0	0	0	0	0	0	0	0	0	0	0	0	0
6	Yamagata	52	Motor vheicle parts and accessories	0	0	0	0	0	0	0	0	0	0	0	0	0	0	0	0	0	0	0	0	0	0	0	0	0	0	0	0	0	0	0	0	0	0	0	0	0	0	0.361384	0	0	0	0	0	0	0
6	Yamagata	53	Other transportation equipment	0.472784	0	0.000416311	0	0	0	0	0	0	0	0	0	0	0	0	0	0	0	0	0	0	0	0	0	0	0	0	0	0	0	0	0	0	0	0	0	0	0	0	0	0	0	0	0	0	0
6	Yamagata	54	Precision instruments	0.211506	0	0	0.00608792	0.0475447	0	0	0.00472828	0.00581492	0.00547559	0.0638363	0.0099666	0	0	0.0294919	0	0	0	0	0.00559417	0.0354612	0	0	0.103305	0.0107072	0	0.00600197	0.017206	0.00580872	0	0	0.00572586	0	0	0	0.0171365	0.0113482	1.29499	4.5902	0.0230336	0.262452	0.755692	0.318204	0.0166378	0.0106651	13.3559
6	Yamagata	55	Miscellaneous manufacturing products	2.85017	0	1.07912	0.200715	2.15534	2.9049	0	22.37	1.7939	9.73557	0.208152	0.140826	0.0379215	0.0278484	0.0138904	0	0.15134	0	0	0.237133	0.0139183	0	0.0926277	0.474393	0.0630378	2.29665	0.0565376	1.14805	1.86038	0	0	3.27665	0	0.0162475	1.73651	0.349749	0.481043	4.73359	0.224104	0.0813648	0	0.200521	0.423024	0.326511	0.0502318	5.4169
6	Yamagata	56	Reuse and recycling	0.0678911	0	0	0	0.0259855	1.7051	0	0	0	0	1.13947	0	0	0.504127	0.353691	0	0.0802825	0	0	0	0	0	0	3.6619	0.0250801	0.750574	0.178077	0.0698577	0.103406	0.263883	0.00370212	2.06902	0.0702924	2.99723	5.02941	0	0.0035442	0	0	0	0	0	0	0.0207848	0	0
6	Yamagata	57	Building construction and repair of construction	0	0	0	0	0	0	0	0	0	0	0	0	0	0	0	0	0	0	0	0	0	0	0	0	0	0	0	0	0	0	0	0	0	0	0	0	0	0	0	0	0	0	0	0	0	0
6	Yamagata	58	Public construction	0	0	0	0	0	0	0	0	0	0	0	0	0	0	0	0	0	0	0	0	0	0	0	0	0	0	0	0	0	0	0	0	0	0	0	0	0	0	0	0	0	0	0	0	0	0
6	Yamagata	59	Other civil enginnering and construction	0	0	0	0	0	0	0	0	0	0	0	0	0	0	0	0	0	0	0	0	0	0	0	0	0	0	0	0	0	0	0	0	0	0	0	0	0	0	0	0	0	0	0	0	0	0
6	Yamagata	60	Electricity	0	0	0	0	0	0	0	0	0	0	0	0	0	0	0	0	0	0	0	0	0	0	0	0	0	0	0	0	0	0	0	0	0	0	0	0	0	0	0	0	0	0	0	0	0	0
6	Yamagata	61	Gas supply and heat supply	0	0	0	0	0	0	0	0	0	0	0	0	0	0	0	0	0	0	0	0	0	0	0	0	0	0	0	0	0	0	0	0	0	0	0	0	0	0	0	0	0	0	0	0	0	0
6	Yamagata	62	Water supply and waste management services	0.0194407	0	0.00596883	0.0035493	0.13719	0.060053	0.00550315	0.00417218	0.00632215	0.00569439	0.0950929	0.0102078	0.00490547	0.0157451	0.0818805	0	0.0471324	0.036949	0.00210242	0.0583533	0.0725457	0	0.000826358	0.0397175	0.0183898	0.026709	0.0300741	0.00162669	0.0307533	0.000797218	0.00317527	0.0148866	0.00205319	0.0318524	0.0234348	0.00684047	0.0254809	0.0260831	0.0352817	0.0120677	0.00223314	0.00981102	0.00372	0.0508592	0.00235269	0.0414456
6	Yamagata	63	Commerce	33.7254	0	1.00691	0.309693	99.0852	8.75326	0.731994	14.3283	11.5829	13.7753	23.4128	13.8587	6.08835	1.61079	10.7944	0	9.60354	2.97262	0.192018	13.8101	12.0758	0	1.83276	40.7641	22.8067	10.3014	5.29643	0.747477	5.57035	0.127624	0.862151	8.70695	3.99656	13.5571	11.6725	8.04253	20.6415	14.8322	15.2453	7.69366	4.41794	10.9541	8.46033	33.5772	4.09143	88.6086
6	Yamagata	64	Financial and insurance	0	0	0	0	0	0	0	0	0	0	0	0	0	0	0	0	0	0	0	0	0	0	0	0	0	0	0	0	0	0	0	0	0	0	0	0	0	0	0	0	0	0	0	0	0	0
6	Yamagata	65	Real estate agencies and rental services	0	0	0	0	0	0	0	0	0	0	0	0	0	0	0	0	0	0	0	0	0	0	0	0	0	0	0	0	0	0	0	0	0	0	0	0	0	0	0	0	0	0	0	0	0	0
6	Yamagata	66	House rent	0	0	0	0	0	0	0	0	0	0	0	0	0	0	0	0	0	0	0	0	0	0	0	0	0	0	0	0	0	0	0	0	0	0	0	0	0	0	0	0	0	0	0	0	0	0
6	Yamagata	67	Transport	25.7241	0	5.70042	0.517617	21.0255	3.142	0.177192	1.82467	4.613	2.56107	4.09361	2.76297	1.54013	0.511638	3.13355	0	1.69063	0.718731	0.0619181	2.82535	3.35153	0.00127704	0.626582	5.55727	2.74827	2.9176	6.72229	0.194623	2.81544	0.0534142	0.252524	2.68568	0.764871	11.2989	3.27742	2.72448	5.77637	2.71096	2.43777	1.76843	0.523478	1.63534	0.864997	6.62241	0.414187	9.79398
6	Yamagata	68	Communication	0	0	0	0	0	0	0	0	0	0	0	0	0	0	0	0	0	0	0	0	0	0	0	0	0	0	0	0	0	0	0	0	0	0	0	0	0	0	0	0	0	0	0	0	0	0
6	Yamagata	69	Broadcasting	0	0	0	0	0	0	0	0	0	0	0	0	0	0	0	0	0	0	0	0	0	0	0	0	0	0	0	0	0	0	0	0	0	0	0	0	0	0	0	0	0	0	0	0	0	0
6	Yamagata	70	Information services	0.165584	0	0.00517622	0.00790847	0.364534	0.155898	0.00261077	0.0381887	0.0384261	0.11721	0.079598	0.056573	0.0400175	0.0310574	0.06363	0	0.0778728	0.0397037	0.00173909	0.0928921	0.574152	0	0.00555384	0.256142	0.176284	0.117049	0.0606796	0.0136052	0.0915336	0.00257184	0.0103774	0.075675	0.0210751	0.159765	0.150002	0.0751713	0.323359	0.194938	0.328495	0.113507	0.0335007	0.238356	0.294222	0.757715	0.0153604	1.33142
6	Yamagata	71	﻿Internet based services	0.00149867	0	0.000519507	0.000776471	0.014402	0.00729022	0.000436713	0.00763874	0.00296661	0.00698373	0.00271396	0.00296606	0.0052486	0.00050275	0.00626914	0	0.00198702	0.000654441	0	0.00451881	0.073119	0	0.000278703	0.0199833	0.0106975	0.0061699	0.00306204	0.000243834	0.00246954	0	0.00025198	0.00608577	0.000251808	0.0158391	0.00823586	0.0109282	0.0151976	0.0124474	0.0104714	0.00489629	0.0011158	0.00814506	0.00676411	0.0278222	0.00181368	0.0612592
6	Yamagata	72	Image information production and distribution industry	0.00137885	0	0.000645261	0.000595326	0.00506774	0.000476006	0.000482157	0.00514155	0.000682356	0.00274149	0.00197837	0.00255349	0.000755839	0.0040011	0.00334539	0	0.000708411	0.000381341	4.01467e-05	0.00245075	0.0108192	0	0.000230778	0.00499038	0.00793657	0.00522248	0.00286418	0.000538414	0.00302189	1.97902e-05	9.27334e-05	0.00129902	0.00018534	0.00218592	0.00117327	0.00201089	0.00963238	0.00325947	0.00363473	0.00155417	0.000882864	0.00272693	0.00248932	0.0142523	0.000750903	0.0282217
6	Yamagata	73	Public administration	0	0	0	0	0	0	0	0	0	0	0	0	0	0	0	0	0	0	0	0	0	0	0	0	0	0	0	0	0	0	0	0	0	0	0	0	0	0	0	0	0	0	0	0	0	0
6	Yamagata	74	Education and Research	0.00662946	0	0.000761567	0.00555152	0.159893	0.0321156	0.00107823	0.0117253	0.00186926	0.0219124	0.013659	0.0135673	0.00105641	0.0281225	0.150913	0	0.0617067	0.0308009	0.00269335	0.189078	0.831335	0	0.0019353	0.214633	0.186181	0.195252	0.0372489	0.00899261	0.0595237	0.000995761	0.00447154	0.0212235	7.77128e-05	0.0479322	0.0784252	0.0316655	0.0410584	0.0784554	0.115423	0.0273508	0.0319563	0.166604	0.163501	0.748406	0.0539097	1.07223
6	Yamagata	75	Medical service, health and social security and nursing care	0.000669749	0	0.000362177	0.00040252	0.00569092	0.0018791	5.85493e-05	0.00139064	0.000371213	0.00047439	0.00117553	0.000602163	0.000342657	0.00024265	0.00141203	0	0.000626032	0.000245671	4.6801e-05	0.00141573	0.00556511	0	0.000104623	0.00210797	0.00268529	0.000913215	0.000779992	7.8457e-05	0.000423791	1.15352e-05	6.75649e-05	0.00109658	0.00021606	0.000755031	0.000441667	0.000989772	0.00275549	0.00272142	0.00159532	0.00252072	0.00041886	0.000909995	0.000397845	0.00250358	0.00017021	0.00567437
6	Yamagata	76	Advertising and survery	0.0250868	0	0.0173924	0.00922409	3.04248	0.985408	0.00424467	0.0968231	0.0307031	0.190816	0.314063	0.445247	0.0177441	0.0285048	0.158156	0	0.0230684	0.0207318	0.00282746	0.77414	1.72367	0	0.00090296	0.359526	0.375588	0.0565041	0.0407847	0.0150098	0.0520063	0.000929193	0.00680317	0.0494242	0.00598271	0.0433975	0.0510708	0.0702872	0.139638	0.151229	0.151639	0.0938581	0.0518154	0.115329	0.112637	0.535494	0.0592505	1.2897
6	Yamagata	77	Giids rental and leasing services	0.140762	0	0.019027	0.0211731	0.252221	0.0402363	0.00747198	0.0408424	0.0342349	0.0619848	0.0459882	0.0344362	0.0318454	0.0034945	0.0687821	0	0.0114209	0.0150463	0.000933231	0.0338253	0.0374827	0	0.0256307	0.217566	0.124981	0.106224	0.140799	0.00860455	0.0983698	0.00161012	0.00498491	0.0695035	0.0106362	0.0304249	0.0734391	0.0446667	0.304651	0.224488	0.22268	0.121864	0.0280396	0.223555	0.0704653	0.387024	0.0233947	1.08087
6	Yamagata	78	Other business services	0	0	0	0	0	0	0	0	0	0	0	0	0	0	0	0	0	0	0	0	0	0	0	0	0	0	0	0	0	0	0	0	0	0	0	0	0	0	0	0	0	0	0	0	0	0
6	Yamagata	79	Personal services	0.0543521	0	0.00141306	0	0.0426098	0.0108742	0	0.0087484	0.00672434	0.00569874	0.00851768	0.00461013	0.00372424	0.00136748	0.0129596	0	0.00337795	0.00296681	0	0.00646906	0.0129856	0	0	0.0197111	0.01362	0.00738416	0.00624658	0.000663231	0.00134343	0	0	0.00463494	0.00136984	0.0175522	0.0144527	0.00462385	0.0177161	0.0104175	0.00970989	0.00599308	0.00303497	0.0110773	0.00534148	0.037197	0.00123331	0.054532
6	Yamagata	80	Activities not elsewhere classified	0	0	0	0	0	0	0	0	0	0	0	0	0	0	0	0	0	0	0	0	0	0	0	0	0	0	0	0	0	0	0	0	0	0	0	0	0	0	0	0	0	0	0	0	0	0
7	Fukushima	1	Agriculture, forestry and fishery	23161.5	0	0.529951	10.0691	64492.9	1804.48	5.82946	14.3087	7378.5	0.529951	0	1.0599	0	6.35941	48.2255	0	83.7322	0	0	71.5434	167.994	0	6.88936	0	4960.87	0	0	0	9.53911	0	0	0	0	0	1.58985	0	0	0	0	0	0	0	0	0	0	0
7	Fukushima	2	Metallic ores	0	0	0	0	0	0	0	0	0	0	0	0	0	0	0	0	0	0	0	0	0	0	0	0	0	0	0	0	0	0	0	0	0	0	0	0	0	0	0	0	0	0	0	0	0	0
7	Fukushima	3	Non-metallic ores	4.21353	0	9.83157	0	0	0	0	0	0	0	92.6977	0.46817	0	91.2932	605.344	0	47.2852	0	0	34.6446	6.08621	0	182.118	0	32.7719	2264.54	1419.49	110.488	1058.06	-0.46817	0	15.4496	0	7.49072	1.40451	0.93634	1.87268	0	0	7.02255	0	0	0	0	0	0
7	Fukushima	4	Coal mining, crude petroleum and natural gas	0	0	0	0.245551	0.245551	0	0.0306938	0	0	0	11.725	0.122775	0	29.9879	2.05649	0	8.16456	1.62677	0.460407	0.64457	0.368326	0.736652	0	0.0306938	0.39902	6.10807	0.920815	0.64457	7.39721	0.0613877	0	0.951509	0	6.87542	0.306938	0.153469	0.0613877	0.184163	0.0306938	0.0306938	0	0.153469	0	0.0920815	0	0
7	Fukushima	5	Food and Tobacco	9008.25	0	0	0	24606.8	2176.04	0	124.746	1.89584	0	144.083	0.379167	0	2.65417	13.2708	0	78.1084	0.758334	0	111.475	434.905	0	0	6.44584	0	11.7542	0	1.51667	30.3334	0	0	0.379167	0	0	0	0	0	0	0	0	0	0	0	0	0	0
7	Fukushima	6	Beverage	66.9371	0	0	0	107.026	176.538	0	0	0	0	0	0	0	0	0	0	0.735573	0	0	0	3.31008	0	0	0	0	0	0	0	0	0	0	0	0	0	0	0	0	0	0	0	0	0	0	0	0	0
7	Fukushima	7	Textile products	0.813745	0	0	0	0.0942232	0.00214144	1.69602	47.1587	0.0364044	1.05787	0.740937	3.35563	0.0428287	0.0621016	0	0	0	0	0.0192729	0.00428287	0	0	0	0.295518	4.50558	0.0728088	0.00214144	0	0.145618	0	0	0.00428287	0	0	0.117779	0.0107072	0.132769	0.0192729	0.0406873	0.00214144	0	0	0	1.83521	0.353337	0.946514
7	Fukushima	8	Wearing aparel and other textile products	51.7085	0	3.76649	1.12995	29.3248	3.33603	0.914718	55.1521	5.91877	7.47917	7.96343	6.08019	0.753297	3.01319	2.36751	0	1.99086	0.376649	0	4.08933	6.77968	0	3.76649	3.60507	7.21013	15.2812	3.1208	1.29137	7.10252	0	0.107614	5.05785	0.53807	0.968525	5.59592	2.42131	11.4609	6.08019	3.92791	6.72587	0.914718	8.01724	4.19694	8.60911	2.74415	33.6832
7	Fukushima	9	Timber and wooden products	158.535	0	2.59468	1.81627	86.1433	17.9033	0	7.52456	2041.75	1927.33	0.518935	57.8613	0.518935	0.259468	0	0	0.259468	0.518935	0	5.96776	0	0	0	21.2763	0.778403	67.4616	3.63255	37.8823	42.8122	0	0	43.5906	0	0	84.0675	12.9734	64.0885	5.18935	7.00563	2.59468	7.00563	7.26509	2.59468	28.282	2.33521	64.0885
7	Fukushima	10	Furniture and fixtures	2.23398	0	3.42543	3.57436	62.1046	3.2765	0.446795	15.6378	2.08505	375.159	7.59552	8.19125	2.38291	1.04252	10.5742	0	3.42543	1.93611	0	12.6592	24.2759	0	0.148932	37.084	12.3613	1.63825	3.57436	4.02116	7.14873	0	0.595727	12.9571	0	0.595727	6.25514	1.63825	8.63804	6.40407	5.36154	4.17009	1.19145	6.1062	7.74445	42.1477	5.06368	523.048
7	Fukushima	11	Pulp, paper, paperboard, building paper	4.01026	0	0	0	90.3912	0.641641	0.240615	3.76964	17.8857	52.8552	2323.3	1412.25	386.509	0	32.6435	0	0	17.966	0	70.9815	14.1161	0	0	67.6931	23.7407	82.5311	0	6.73723	40.5036	0	0	0	0.401026	0	8.18092	0.320821	3.128	1.84472	0.0802051	7.05805	0	53.9781	1.12287	69.8587	3.93005	77.5584
7	Fukushima	12	Paper products	1515.4	0	0	0	2369.71	856.186	5.62787	121.937	5.62787	235.62	30.0153	428.468	18.7596	37.8943	101.302	0	22.8867	7.12863	3.37672	462.235	808.912	0	0.375191	240.122	24.3874	661.837	3.37672	109.181	77.6645	0	0	0	9.00458	0	28.1393	0.375191	185.344	38.6447	6.75344	35.268	15.758	51.7764	26.6386	289.647	57.7794	569.54
7	Fukushima	13	Publishing, printing	8.02817	0	2.0943	3.14146	1578.41	90.4041	6.63196	173.827	12.5658	129.498	13.962	467.728	812.59	6.98101	50.2633	0	5.23576	8.02817	2.44335	362.664	123.215	0	1.04715	32.8108	35.6032	191.978	7.33006	4.53766	20.943	0.349051	1.3962	56.1972	0.349051	12.2168	27.226	10.1225	116.932	49.9142	75.0459	38.7446	85.8665	27.575	42.2351	119.724	77.4893	1649.61
7	Fukushima	14	Chemical fertilizer	2010.75	0	0	0	0.50515	1.76802	0	0.252575	0	0	0	0.252575	0	713.776	168.72	0	87.896	15.4071	0	56.3242	21.974	0	0	0	0.757724	5.0515	0	0	2.27317	0	0.50515	0	0	6.56695	0.252575	0	0	0	0.252575	0	0	0	0	18.6905	0	0
7	Fukushima	15	Basic inorganic chemical products	28.4686	0	0.38998	0	416.499	89.3055	56.9371	92.4253	0.38998	7.7996	196.16	28.8585	0.38998	505.024	5227.68	0	1082.59	123.234	2.33988	1887.5	983.14	0	1.55992	406.749	3000.51	1053.34	7.7996	39.778	36.6581	9.35952	3.8998	28.8585	1.55992	87.7455	35.8782	81.1159	72.9263	17.9391	15.9892	37.4381	3.11984	30.8084	24.9587	1248.72	5.45972	406.749
7	Fukushima	16	Basic organic chemical products	0	0	0	0	0	0	0	0	0	0	0	0	0	0	0	0	0	0	0	0	0	0	0	0	0	0	0	0	0	0	0	0	0	0	0	0	0	0	0	0	0	0	0	0	0	0
7	Fukushima	17	Organic chemical products	0.38387	0	0.076774	0	94.1249	13.589	10.518	0.153548	4.37612	7.21675	74.2404	49.2889	1.45871	6.29547	437.688	0	757.529	1074.91	57.6573	713.998	448.283	0	0.921288	480.682	1909.29	32.936	0.460644	0.38387	116.543	0	0	0	0	6.83288	18.8096	0.307096	2.68709	0.38387	0.38387	2.45677	2.0729	4.29934	1.15161	87.8294	7.98449	27.4083
7	Fukushima	18	Synthetic resins	0	0	0	0	0	0	0.0256384	0	0.102554	5.43535	21.6389	5.84557	0.538407	0	0	0	0	0.3333	2.79459	52.2512	0	0	0	923.061	0.487131	37.4065	0	0	4.02524	0	0	0	0	0	10.4605	0.0256384	0.974261	0	0	0.717877	0.307661	5.61482	0	23.972	3.9996	44.7391
7	Fukushima	19	Synthetic fibers	0	0	0	0	7.03673	0	3.60732	10.5078	0.0113557	0.219543	0.34067	0.00757045	0	0	0	0	0	0	0	0	0	0	0.0264966	0.295247	0.0264966	0.828964	0	0	1.85854	0	0	0	0	0	0	0	0	0	0	0	0	0	0	0	0	0
7	Fukushima	20	Final chemical products	695.584	0	8.73926	0.850725	75.2505	4.87233	10.2087	25.7538	86.3099	113.688	157.307	94.7398	104.098	6.10975	13.921	0	59.0094	18.3293	1.93347	843.532	103.17	0	20.7268	118.792	64.9644	36.8132	19.644	0.232016	51.4302	0	0.154677	22.1962	0.309354	0.464032	15.4677	26.8365	80.5095	16.7051	25.2124	13.4569	24.5937	25.3671	11.3688	116.163	5.56838	117.245
7	Fukushima	21	Medicaments	298.449	0	0	0	30.1051	0	0	2.23001	0	0	0	0	0	0	0	0	0	0	0	9.66336	2015.92	0	0	0	0	0	0	0	0	0	0	0	0	0	0	0	0	0	0	0	0	0	0	0	0	0
7	Fukushima	22	Petroleum refinery products	0.704693	0	0.02791	0.00293789	0.443488	0.107099	0.0348541	0.0185621	0.0536833	0.014823	0.0909411	0.037792	0.0237702	0.0966833	0.406097	0	0.0446025	0.0125528	0.00240373	0.127932	0.104429	0.00013354	0.228488	0.13127	0.0846647	0.384597	0.0550187	0.0205652	0.158646	0.00106832	0.00347205	0.069174	0.0042733	0.13995	0.0440684	0.0236367	0.131671	0.0339193	0.0548851	0.037792	0.00934783	0.0248385	0.00320497	0.0674379	0.00574224	0.0337857
7	Fukushima	23	Coal products	0	0	0.611715	0	0	0	0	0	0.305857	0	2.44686	0	0	22.9393	29.3623	0	313.81	0	0	1.83514	0	0	0	1.83514	0	0	0	0	68.5121	1.22343	16.8222	184.738	0.305857	37.0087	3.67029	6.11715	1.22343	0	0.917572	0.611715	0	0.917572	0	0.305857	0	0.305857
7	Fukushima	24	Plastic products	154.134	0	0.15375	0.691874	442.492	271.061	0.538124	56.4261	21.9862	142.91	69.1105	311.189	137.298	11.8387	69.8792	0	0.538124	0	0.768748	171.508	274.443	0	0	3999.41	262.989	76.4905	1.38375	1.15312	8.84061	0	0	0.538124	0	3.68999	65.113	4.91999	24.5231	22.2168	35.3624	36.1312	47.1243	114.39	26.1374	1205.47	69.9561	1329.47
7	Fukushima	25	Rubber products	54.6457	0	7.18281	4.08434	15.4923	1.26755	0.140839	46.6179	2.39427	13.3797	10.8446	21.971	4.36602	2.53511	2.39427	0	3.23931	1.54923	0	11.408	20.8442	0	1.40839	19.295	657.298	0.140839	3.23931	0	14.5065	0.422518	3.09847	9.85876	0.281679	0.845037	1.97175	16.9007	16.1965	96.475	253.088	36.7591	38.0266	65.772	23.661	75.6308	24.6469	342.24
7	Fukushima	26	Glass and glass products	3.00901	0	0	0	49.3143	379.971	0.334334	6.85386	0.668669	262.285	0	0	0	0	35.1051	0	4.01201	0	0	50.8188	194.415	0	0	173.854	8.85986	404.545	2.00601	0	13.039	0	0	0	0	0	22.5676	3.17618	21.8989	4.84785	4.01201	0	7.52252	1.67167	9.86286	524.738	10.3644	50.4845
7	Fukushima	27	Cement and cement products	0.524153	0	0	2.09661	0	0	0	0	0	0	0	0	0	0	0	0	0	0	0	0.524153	0	0	1.04831	0	0	0	2706.72	0	23.5869	0	0	0	0	0	0	0	9.9589	0	0	0	0	0	0	1.04831	0	0
7	Fukushima	28	Pottery, china and earthenware	0	0	0	0	3.53434	0.807848	0	0	0	16.2579	0	0	0	0	2.82747	0	0	0	0	0.605886	0	0	0	1.41373	0	0.100981	1.00981	8.28044	0	0	0	0.100981	0	0	0	0	1.31275	0.201962	0.504905	0	0.100981	18.0756	0.302943	6.05886	0.201962	21.105
7	Fukushima	29	Other ceramic, stone and clay products	322.345	0	0	2.5912	10.883	1.03648	0	0	3.62768	21.2478	94.8378	0.518239	0.518239	5.18239	949.933	0	9.84655	18.6566	0	44.5686	61.1522	0	72.5535	41.4591	11.4013	993.983	566.436	95.8743	1232.89	56.4881	2.07296	515.13	0	387.125	92.2466	68.4076	230.617	602.712	102.093	159.099	4.14591	210.923	39.9044	848.876	16.0654	418.219
7	Fukushima	30	Pig iron and crude steel	0	0	0	0	0	0	0	0	0	0	0	0	0	0	0.101416	0	0	0	0	0	0	0	0	0	0	0	0	0	-0.00274098	3.1439	0.0575605	16.095	0.191868	0	0	-0.0630425	-0.718136	-0.169941	-0.408406	-0.0411147	-0.0109639	-0.0877113	0	-0.518045	0	-0.345363
7	Fukushima	31	steel products	0.0912548	0	0.0772156	0.421176	0	0	0	0.0210588	0.18251	8.71835	0	0	0	0	0	0	0	0	0	0	0	0	0	2.49196	2.66043	0	8.11466	0	0.800235	0	41.198	42.1597	67.2478	0.133372	0.463294	47.8807	137.746	31.6514	28.4294	33.2308	1.13718	21.6835	1.432	24.2106	4.35917	28.0995
7	Fukushima	32	Cast and forged steel products	0	0	0	0.076147	0	0	0	0	0	2.589	0	0	0	0	0	0	0	0	0	0	0	0	0	0	0	0	0.228441	1.37065	1.21835	0	0	25.6615	0	0	1.67523	69.6745	88.1021	181.534	210.242	186.865	9.13764	90.5388	9.36608	33.0478	1.82753	19.7221
7	Fukushima	33	Other iron or steel products	0	0	0	0	0	0	0	0	0.639542	630.269	0	0	0	0	21.1049	0	0.319771	0	0	1.59886	0	0	0	2.87794	0	0	47.9657	1.59886	26.8608	0	0	68.1113	0	0	11.5118	1265.97	4165.34	469.744	583.582	114.158	25.2619	316.893	0.639542	573.03	173.316	209.77
7	Fukushima	34	Non-ferrous metals	0	0	0	0	0	0	0	0	0.0235164	0.705491	0.376262	0	-0.376262	0	106.506	0	0.729008	0	0	21.6821	0	0	0	1.08175	-0.0235164	10.9821	0	2.11647	10.5589	0.940655	1.10527	2.4457	-0.0705491	236.763	1297.26	0.564393	78.286	-0.587909	1.03472	1.17582	-0.0235164	8.72457	0.493844	543.487	0.25868	7.99557
7	Fukushima	35	Non-ferrous metal products	0	0	0	1.16512	136.966	9.96822	0	0	5.1783	81.1698	0	7.12016	12.9457	0	26.4093	0	0	0	0	25.762	16.9589	0	0	48.0287	27.8333	10.745	0	0.906202	17.6062	0	0	0.906202	0	12.4279	611.168	356.137	750.982	280.405	165.188	327.009	18.7713	573.367	105.378	2371.4	112.628	1667.54
7	Fukushima	36	Metal products for construction and architecture	1.61287	0	0	1.34406	0	0	0	0	1.07525	22.5802	0	0	0	0	0	0	0	0	0	0	0	0	0	0	0	0	5.10743	0	0	0	0	0.806437	0	0	0.537625	199.996	55.913	13.1718	0	16.6664	0	0	0	0	0	4.83862
7	Fukushima	37	Other metal products	64.9851	0	50.6479	33.5055	232.513	1274.92	0	46.596	131.996	499.466	23.9993	11.688	3.58431	0	239.37	0	106.127	15.2723	0	155.528	245.603	0	4.83103	66.5435	587.515	45.9727	110.023	20.5708	81.8158	0	0	110.023	0.15584	9.81789	36.6223	332.094	1717.98	597.177	517.387	349.548	128.568	342.224	131.373	561.958	114.23	2144.82
7	Fukushima	38	General industrial machinery	0.284775	0	1.54592	0.325457	0	0	0	0	0.0406822	1.1391	0	0	0	0	0	0	0	0	0	0	0	0	0.0406822	42.5942	0	63.1794	0.0406822	0.691597	3.6614	0	0	6.02096	0.325457	0.284775	0.691597	1.30183	6.8346	635.822	125.301	22.7413	14.9304	15.4185	8.29916	6.30574	14.7676	10.4553
7	Fukushima	39	Special industrial machinery	0	0	0	0	0	0	0	0	0	0	0	0	0	0	0	0	0	0	0	0	0	0	0	0	0	1.64347	0	0	0	0	0	0	0	0	0	0	0	13.7738	1433.03	0.0782605	0.234782	0.156521	0.234782	5.39998	0.547824	0
7	Fukushima	40	Other general machines	0	0	15.99	2.22084	0	0	0	0	2.66501	235.853	0	0	0	0	0	0	0	0	0	4.88585	0	0	0	33.7568	0	2.66501	0.444168	20.4317	38.6426	0	0	57.2977	0	0	13.325	19.9876	59.0743	701.785	802.167	2132.01	43.0843	633.828	100.382	60.851	67.9577	567.202
7	Fukushima	41	Machinery for office and service industry	0	0	0	0	0	0	0	0	0	0	0	0	0	0	0	0	0	0	0	0	0	0	0	0	0	0	0	0	0	0	0	0	0	0	0	0	0	0	0	0	783.703	0	0	0	0	0
7	Fukushima	42	Industrial electric equipment	0.74093	0	0.0370465	0	0	0	0	0	0.0370465	0.296372	0	0	0	0	0	0	0	0	0	0	0	0	0	0.0370465	0	0	0	0	0	0	0	0	0	0	0.0370465	2.03756	0.259325	50.4944	76.3158	1.51891	13.0404	288.703	27.081	17.8564	16.9302	192.864
7	Fukushima	43	Applied electric equipment and electric mesuring instruments	0	0	0	0	0	0	0	0	0	0	0	0	0	0	0	0	0	0	0	0	0	0	0	0	0	0	0	0	0	0	0	0	0	0	0	0	0	32.7981	169.106	9.92969	18.3549	50.852	574.718	0	0	18.6558
7	Fukushima	44	Other electric equipment	2.39611	0	0.0570503	0	0.798705	0	0	0	0	2.33906	0	0	0	0	0.171151	0	0	0	0	0.855755	0.0570503	0	0	0.114101	0	0	0	0	0	0	0	0	0	0	0.114101	0	3.59417	1.76856	8.32935	2.22496	4.27878	20.7093	14.2626	579.917	13.1216	228.03
7	Fukushima	45	Household electric and electric applications	0	0	0	0	0	0	0	0	0	0	0	0	0	0	0	0	0	0	0	0	0	0	0	0.101641	0	0	0	0	0	0	0	0	0	0	0	0	0	0	0	0	0	0	0	0	187.731	0
7	Fukushima	46	Communication equipment	0.22291	0	0	0	0	0.89164	0	0.22291	0	0.22291	0.22291	0	0.22291	0	0.22291	0	0	0	0	0	7.13312	0	0	0.22291	1.33746	0.44582	0.22291	0	0	0	0	0.22291	0	0.89164	0.22291	0.44582	0.44582	7.13312	2.2291	0.22291	0	0	4.68111	1.78328	0.22291	2773
7	Fukushima	47	Electric computing equipment and accessory equipment	0	0	0	0	0	0	0	0	0	0	0	0	0	0	0	0	0	0	0	0	0	0	0	0	0	0	0	0	0	0	0	0	0	0	0	0	0	0	18.0339	0	0	0	0	0	0	3.51508
7	Fukushima	48	Semiconductor devices and integrated circuits	0	0	0	0	0	0	0	0	0	0	0	0	0	0	0	0	0	0	0	0	0	0	0	0	0	0	0	0	0	0	0	0	0	0	0	0	-0.544384	-0.256181	-2.73259	-0.928655	-12.7236	-16.2675	-65.6783	-2.25226	-14.677	-484.939
7	Fukushima	49	Other electrical equipment	0	0	0	0	1.17112	0.390374	0	0	0	0	0	0.780748	21.0802	0	0	0	0	0	0	0	0.780748	0	0	0.390374	0	0	0	0	0	0	0	0	0	0	9.36898	0	74.1711	151.856	208.85	24.2032	726.877	756.545	4160.22	88.6149	740.93	33733.4
7	Fukushima	50	Passenger motor cars	0	0	0	0	0	0	0	0	0	0	0	0	0	0	0	0	0	0	0	0	0	0	0	0	0	0	0	0	0	0	0	0	0	0	0	0	0	0	0	0	0	0	0	0	0	0
7	Fukushima	51	Other cars	0	0	0	0	0	0	0	0	0	0	0	0	0	0	0	0	0	0	0	0	0	0	0	0	0	0	0	0	0	0	0	0	0	0	0	0	0	0	0	0	0	0	0	0	0	0
7	Fukushima	52	Motor vheicle parts and accessories	0	0	0	0	0	0	0	0	0	0	0	0	0	0	0	0	0	0	0	0	0	0	0	0	0	0	0	0	0	0	0	0	0	0	0	0	0	0	6.14557	0	0	0	0	0	0	0
7	Fukushima	53	Other transportation equipment	-7.12675	0	-0.00603451	0	0	0	0	0	0	0	0	0	0	0	0	0	0	0	0	0	0	0	0	0	0	0	0	0	0	0	0	0	0	0	0	0	0	0	0	0	0	0	0	0	0	0
7	Fukushima	54	Precision instruments	3.36859	0	0	0.0935719	0.748575	0	0	0.0935719	0.0935719	0.0935719	1.21643	0.187144	0	0	0.467859	0	0	0	0	0.0935719	0.561431	0	0	1.87144	0.187144	0	0.0935719	0.280716	0.0935719	0	0	0.0935719	0	0	0	0.280716	0.187144	21.5215	76.7289	0.374288	4.67859	13.2872	5.80146	0.280716	0.187144	238.515
7	Fukushima	55	Miscellaneous manufacturing products	18.9723	0	6.9074	1.28938	14.1832	20.538	0	185.026	12.0649	69.5345	1.65778	1.10518	0.276296	0.184197	0.0920987	0	1.01309	0	0	1.65778	0.0920987	0	0.552592	3.59185	0.460493	15.4726	0.368395	7.82839	12.5254	0	0	22.38	0	0.0920987	10.8676	2.39457	3.31555	32.8792	1.56568	0.552592	0	1.47358	3.22345	2.30247	0.368395	40.4313
7	Fukushima	56	Reuse and recycling	18.8301	0	0	0	7.12491	502.306	0	0	0	0	378.129	0	0	138.936	97.713	0	22.3926	0	0	0	0	0	0	1155.25	7.63383	210.694	48.3476	19.848	29.0086	84.99	1.01784	588.823	19.339	707.911	1311.49	0	1.01784	0	0	0	0	0	0	6.10706	0	0
7	Fukushima	57	Building construction and repair of construction	388	0	19	8	113	72	3	76	31	58	171	120	18	59	448	0	572	242	15	162	59	0	20	288	74	101	185	2	179	3	14	118	16	301	75	116	208	46	103	25	2	64	19	324	7	1030
7	Fukushima	58	Public construction	0	0	0	0	0	0	0	0	0	0	0	0	0	0	0	0	0	0	0	0	0	0	0	0	0	0	0	0	0	0	0	0	0	0	0	0	0	0	0	0	0	0	0	0	0	0
7	Fukushima	59	Other civil enginnering and construction	0	0	0	0	0	0	0	0	0	0	0	0	0	0	0	0	0	0	0	0	0	0	0	0	0	0	0	0	0	0	0	0	0	0	0	0	0	0	0	0	0	0	0	0	0	0
7	Fukushima	60	Electricity	2031.75	0	300.936	487.064	3953.92	938.468	153.947	654.927	870.627	485.324	4923.69	529.682	514.896	442.706	4922.82	0	1571.65	282.671	160.035	1228.1	666.234	0	113.938	4187.88	2473.59	2106.55	394	101.762	1520.34	227.876	110.459	4829.76	158.296	3260.72	1916.07	405.307	3731.26	941.947	870.627	921.073	308.764	566.212	171.342	2887.59	167.863	1659.5
7	Fukushima	61	Gas supply and heat supply	0.615314	0	0.205105	0.410209	143.983	84.7082	5.12762	3.07657	1.02552	3.89699	17.8441	10.2552	0.205105	27.2789	33.0219	0	14.1522	8.6144	0.615314	25.0228	35.8933	0	0.820419	51.8915	31.1759	260.688	2.46126	11.691	15.3829	1.23063	6.35825	89.6307	0.410209	4.71741	70.3509	12.7165	65.6335	9.84503	11.2808	6.35825	2.05105	14.5624	4.10209	153.418	0.410209	52.5068
7	Fukushima	62	Water supply and waste management services	206.484	0	60.9618	36.3805	1440.47	677.463	66.8614	55.0623	67.8446	64.8949	1208.42	127.823	57.0288	166.17	866.248	0	503.427	449.348	25.5646	650.915	765.956	0	7.86604	479.829	214.35	287.111	312.675	17.6986	330.374	9.83256	33.4307	162.237	21.6316	288.094	234.015	74.7274	280.228	289.077	393.302	130.773	26.5479	115.041	45.2298	572.255	27.5312	493.594
7	Fukushima	63	Commerce	5475.94	0	157.212	48.5271	15904.4	1509.55	135.956	2890.77	1900.18	2399.88	4548.31	2652.95	1082.03	259.88	1745.77	0	1568.11	552.647	35.6935	2354.97	1949.1	0	266.698	7528.51	4063.84	1692.83	841.804	124.326	914.795	24.063	138.763	1450.6	643.685	1874.51	1781.87	1343.12	3470.29	2512.98	2598	1274.54	802.902	1963.54	1572.52	5775.52	731.916	16132.2
7	Fukushima	64	Financial and insurance	4167.48	0	801.862	298.859	4326.56	846.001	240.926	2429.5	846.921	1136.58	1139.34	964.626	511.279	305.296	1329.69	0	685.077	433.116	22.9892	2128.8	1017.04	0	29.4261	1053.82	1372.91	1680.97	1106.24	124.142	686.916	20.2305	80.0023	618.868	155.407	1931.09	1836.37	831.288	1394.06	1049.23	1088.77	861.634	107.589	412.885	287.824	2242.82	156.326	4317.37
7	Fukushima	65	Real estate agencies and rental services	51.6962	0	54.6786	93.4508	355.908	150.118	9.94157	157.077	52.6903	189.884	156.083	151.112	106.375	27.8364	181.931	0	137.194	69.591	5.96494	155.089	373.803	0	12.924	391.698	163.042	256.493	129.24	13.9182	70.5852	1.98831	8.94741	117.311	12.924	116.316	80.5267	182.925	320.119	135.205	156.083	111.346	21.8715	94.4449	73.5676	792.343	29.8247	1170.12
7	Fukushima	66	House rent	0	0	0	0	0	0	0	0	0	0	0	0	0	0	0	0	0	0	0	0	0	0	0	0	0	0	0	0	0	0	0	0	0	0	0	0	0	0	0	0	0	0	0	0	0	0
7	Fukushima	67	Transport	15246.6	0	3248.89	296.07	12319.4	1977.96	120.135	1343.8	2762.45	1628.71	2902.93	1930.69	999.155	301.322	1849.95	0	1007.69	487.761	42.0144	1758.7	1974.68	0.656475	332.833	3746.5	1787.58	1750.16	3900.12	118.166	1687.8	36.7626	148.363	1633.31	449.685	5702.8	1826.31	1660.88	3544.97	1676.64	1516.46	1069.4	347.275	1070.05	586.889	4158.11	270.468	6508.95
7	Fukushima	68	Communication	207.868	0	42.8934	109.708	335.723	129.505	16.4974	254.885	56.9162	166.624	145.178	141.878	119.606	19.7969	210.342	0	54.4416	30.5203	3.29949	159.2	2345.11	0	16.4974	399.238	540.291	169.924	85.7867	10.7233	92.3857	0	11.5482	139.403	6.59898	360.469	208.693	357.995	372.017	471.827	296.129	230.964	54.4416	189.721	164.15	584.009	53.6167	1247.21
7	Fukushima	69	Broadcasting	8	0	0	1	11	2	0	1	1	2	3	2	1	0	1	0	1	1	0	3	0	0	0	7	4	2	2	0	0	0	0	1	0	5	2	1	4	3	4	2	1	1	2	7	1	14
7	Fukushima	70	Information services	59.4911	0	1.78831	2.74207	129.474	59.4911	1.07299	17.0485	13.9488	45.1846	34.2163	23.9633	15.7371	11.0875	22.7711	0	28.1361	16.3332	0.715324	35.0509	205.059	0	1.78831	104.676	69.5056	42.5618	21.3405	5.00727	33.2625	1.07299	3.69584	27.8976	7.5109	48.8804	50.6688	27.7784	120.294	73.0822	123.87	41.608	13.4719	94.5419	121.009	288.395	6.08025	536.374
7	Fukushima	71	﻿Internet based services	1.65919	0	0.553064	0.829596	15.7623	8.5725	0.553064	10.5082	3.31839	8.29596	3.59492	3.87145	6.36024	0.553064	6.9133	0	2.21226	0.829596	0	5.25411	80.4709	0	0.276532	25.1644	12.997	6.9133	3.31839	0.276532	2.76532	0	0.276532	6.9133	0.276532	14.9327	8.5725	12.4439	17.4215	14.3797	12.1674	5.53064	1.38266	9.95516	8.5725	32.6308	2.21226	76.0463
7	Fukushima	72	Image information production and distribution industry	24.9414	0	11.2236	10.3923	90.6204	9.14518	9.97656	115.562	12.4707	53.2083	42.8161	54.4554	14.9648	71.9144	60.2751	0	12.8864	7.89811	0.83138	46.5573	194.543	0	3.74121	102.675	157.547	95.6087	50.7142	9.97656	55.2868	0.41569	1.66276	24.11	3.32552	33.6709	19.9531	37.4121	180.409	61.5221	69.0045	28.6826	17.8747	54.4554	51.5456	273.108	14.9648	572.405
7	Fukushima	73	Public administration	0	0	0	0	0	0	0	0	0	0	0	0	0	0	0	0	0	0	0	0	0	0	0	0	0	0	0	0	0	0	0	0	0	0	0	0	0	0	0	0	0	0	0	0	0	0
7	Fukushima	74	Education and Research	138.5	0	15.2994	111.927	3302.26	712.631	25.7674	304.378	39.4564	491.192	341.419	334.172	24.157	583.794	3140.41	0	1296.42	736.788	64.4186	4148.56	17265	0	36.2355	5100.34	4268.54	4128.43	761.75	192.451	1257.77	24.157	92.6017	454.956	1.61047	852.741	1540.41	680.421	888.171	1710.31	2530.85	582.988	747.256	3842.57	3910.21	16563.6	1240.86	25117.6
7	Fukushima	75	Medical service, health and social security and nursing care	49.7489	0	25.8694	28.8543	417.89	148.252	4.97489	128.352	27.8594	37.8091	104.473	52.7338	27.8594	17.9096	104.473	0	46.7639	20.8945	3.97991	110.442	410.926	0	6.96484	178.101	218.895	68.6534	56.7137	5.96986	31.8393	0.994977	4.97489	83.5781	15.9196	47.7589	30.8443	75.6183	211.93	210.935	124.372	191.036	34.8242	74.6233	33.8292	197.005	13.9297	472.614
7	Fukushima	76	Advertising and survery	18.6822	0	12.4548	6.62916	2239.85	779.428	3.6159	89.5941	23.1016	152.471	279.831	390.919	14.4636	21.0928	117.316	0	17.276	17.6778	2.4106	605.463	1276.01	0	0.602651	304.54	306.95	42.5873	29.7308	11.4504	39.1723	0.803534	5.02209	37.7661	4.41944	27.521	35.7573	53.8368	107.674	117.517	118.521	71.3137	43.19	94.817	96.0223	422.458	48.6138	1076.94
7	Fukushima	77	Giids rental and leasing services	274.597	0	35.6924	39.8609	486.407	83.3692	16.6738	99.001	67.477	129.743	107.338	79.2008	67.998	6.77375	133.651	0	22.4055	33.6082	2.08423	69.3007	72.6875	0	44.811	482.76	267.563	209.726	268.866	17.1949	194.094	3.6474	9.63957	139.122	20.5818	50.5426	134.693	89.6219	615.369	456.968	455.925	242.552	61.2243	481.457	157.359	799.824	50.2821	2364.3
7	Fukushima	78	Other business services	2465.07	0	258.384	234.378	4671.77	731.562	42.9588	1225.59	562.254	693.658	609.004	683.55	838.328	166.149	1633.7	0	456.753	204.054	17.6889	795.369	1648.86	0	99.1842	3482.19	2921.2	2489.71	1279.92	50.5397	883.813	10.1079	44.2223	1400.58	52.435	1074.6	1035.43	1139.04	1995.06	1856.7	1361.41	658.912	288.708	1130.19	974.153	3326.78	323.454	6383.17
7	Fukushima	79	Personal services	71.3253	0	1.78313	0	55.2771	15.1566	0	14.2651	8.91566	8.02409	13.3735	7.13253	5.3494	1.78313	16.9398	0	4.45783	4.45783	0	8.91566	16.9398	0	0	29.4217	19.6145	9.80723	8.02409	0.891566	1.78313	0	0	6.24096	1.78313	19.6145	17.8313	6.24096	24.0723	14.2651	13.3735	8.02409	4.45783	16.0482	8.02409	51.7108	1.78313	80.2409
7	Fukushima	80	Activities not elsewhere classified	4288.57	0	99.4658	128.773	5962.62	408.52	15.9856	507.986	506.21	141.206	693.596	245.112	190.051	9.76896	268.202	0	103.018	68.3827	15.9856	312.607	352.571	0	66.6065	953.806	471.574	576.369	483.119	52.3971	360.563	23.0903	67.4946	627.878	133.213	357.899	385.43	145.646	931.603	1062.15	730.896	272.643	91.473	303.726	187.386	834.802	63.0542	1634.97
8	Ibaraki	1	Agriculture, forestry and fishery	606.841	0	0.0144394	0.273367	1709.27	44.5127	0.13352	0.30171	191.337	0.0129406	0	0.0235543	0	0.167684	1.26852	0	2.18151	0	0	1.78481	4.42777	0	0.201406	0	118.439	0	0	0	0.247102	0	0	0	0	0	0.0443054	0	0	0	0	0	0	0	0	0	0	0
8	Ibaraki	2	Metallic ores	0	0	0	0	0	0	0	0	0	0	0	0	0	0	0	0	0	0	0	0	0	0	0	0	0	0	0	0	0	0	0	0	0	0	0	0	0	0	0	0	0	0	0	0	0	0
8	Ibaraki	3	Non-metallic ores	0.166523	0	0.404069	0	0	0	0	0	0	0	3.06196	0.0156938	0	3.63105	24.0183	0	1.85827	0	0	1.3037	0.241967	0	8.03094	0	1.1802	88.428	57.3105	4.26267	41.3428	-0.0159337	0	0.595066	0	0.347643	0.0590397	0.0359783	0.0714774	0	0	0.272022	0	0	0	0	0	0
8	Ibaraki	4	Coal mining, crude petroleum and natural gas	0	0	0	0	0	0	0	0	0	0	0	0	0	0	0	0	0	0	0	0	0	0	0	0	0	0	0	0	0	0	0	0	0	0	0	0	0	0	0	0	0	0	0	0	0	0
8	Ibaraki	5	Food and Tobacco	612.553	0	0	0	1692.58	139.313	0	6.82672	0.127593	0	8.18881	0.0218691	0	0.181634	0.90597	0	5.28151	0.0450357	0	7.21765	29.7494	0	0	0.385348	0	0.789728	0	0.100678	2.03931	0	0	0.0251278	0	0	0	0	0	0	0	0	0	0	0	0	0	0
8	Ibaraki	6	Beverage	15.8528	0	0	0	25.6401	39.364	0	0	0	0	0	0	0	0	0	0	0.173229	0	0	0	0.788604	0	0	0	0	0	0	0	0	0	0	0	0	0	0	0	0	0	0	0	0	0	0	0	0	0
8	Ibaraki	7	Textile products	7.1203	0	0	0	0.833986	0.0176416	12.9733	332.088	0.315273	8.62685	5.41869	24.9046	0.342377	0.546864	0	0	0	0	0.147303	0.0356829	0	0	0	2.27334	35.9243	0.629471	0.019142	0	1.25975	0	0	0.0365229	0	0	1.09615	0.0910887	1.12198	0.161613	0.339207	0.0183652	0	0	0	15.1583	2.80617	7.38617
8	Ibaraki	8	Wearing aparel and other textile products	4.30377	0	0.326008	0.0974525	2.46896	0.261421	0.0665556	3.69429	0.487575	0.580164	0.553976	0.42924	0.0572814	0.252394	0.197829	0	0.164772	0.027379	0	0.324081	0.567646	0	0.349791	0.263797	0.546836	1.25668	0.265355	0.104924	0.584466	0	0.00903577	0.410273	0.045148	0.0946629	0.495393	0.195938	0.92126	0.484979	0.311491	0.548677	0.0680194	0.604432	0.30515	0.676393	0.207305	2.50024
8	Ibaraki	9	Timber and wooden products	6.55022	0	0.111486	0.0777607	3.60034	0.696444	0	0.250204	83.4944	74.2158	0.0179204	2.02776	0.0195886	0.010789	0	0	0.0106603	0.0187257	0	0.234778	0	0	0	0.772855	0.0293064	2.75404	0.153326	1.52794	1.74887	0	0	1.75527	0	0	3.69446	0.521152	2.55734	0.205477	0.275788	0.105074	0.258605	0.271899	0.0936499	1.10305	0.0875733	2.36153
8	Ibaraki	10	Furniture and fixtures	0.348472	0	0.555661	0.577745	9.79951	0.481196	0.0609268	1.96313	0.321905	54.54	0.990263	1.08377	0.339591	0.163659	1.65595	0	0.531327	0.263763	0	1.88023	3.80931	0	0.0259216	5.08565	1.75704	0.252494	0.569589	0.612321	1.1025	0	0.0937447	1.96977	0	0.109124	1.03781	0.248456	1.30131	0.957335	0.79685	0.637553	0.166045	0.862773	1.05529	6.20608	0.71692	72.7635
8	Ibaraki	11	Pulp, paper, paperboard, building paper	1.00352	0	0	0	22.8809	0.151171	0.0526367	0.759166	4.42981	12.3269	485.919	299.753	88.3637	0	8.20094	0	0	3.92643	0	16.9128	3.55346	0	0	14.8926	5.41347	20.4058	0	1.64579	10.0209	0	0	0	0.101167	0	2.17745	0.0780543	0.75596	0.442388	0.0191229	1.7311	0	12.2351	0.245458	16.5017	0.892622	17.3088
8	Ibaraki	12	Paper products	145.845	0	0	0	230.702	77.5813	0.4735	9.44461	0.536085	21.1343	2.41442	34.9769	1.64949	3.67034	9.78801	0	2.19031	0.599191	0.283867	42.3589	78.3157	0	0.0402907	20.3174	2.13875	62.936	0.331997	10.2577	7.39007	0	0	0	0.873662	0	2.88052	0.0351074	17.2275	3.5643	0.619282	3.32681	1.35496	4.51371	2.2396	26.3142	5.04724	48.8847
8	Ibaraki	13	Publishing, printing	0.170415	0	0.0462312	0.0690986	33.8923	1.80676	0.123067	2.96955	0.264001	2.56191	0.247709	8.42132	15.7588	0.149133	1.07116	0	0.110517	0.148833	0.0453034	7.33009	2.63109	0	0.024802	0.612318	0.688662	4.02646	0.158954	0.0940288	0.439531	0.00638063	0.0298984	1.16259	0.00746952	0.304529	0.614702	0.208909	2.39718	1.01539	1.5178	0.80609	1.62844	0.530203	0.783172	2.39898	1.49295	31.2288
8	Ibaraki	14	Chemical fertilizer	166.871	0	0	0	0.0424067	0.138145	0	0.0168692	0	0	0	0.0177791	0	59.6145	14.0573	0	7.25354	1.1167	0	4.45075	1.83449	0	0	0	0.057301	0.414215	0	0	0.186516	0	0.0422915	0	0	0.639984	0.0222949	0	0	0	0.0199715	0	0	0	0	1.46419	0	0
8	Ibaraki	15	Basic inorganic chemical products	2.8947	0	0.0412369	0	42.8394	8.54948	5.06109	7.56331	0.0392468	0.739131	16.6707	2.48891	0.0362277	51.6794	533.655	0	109.461	10.9436	0.207819	182.743	100.562	0	0.176981	36.361	278.01	105.825	0.810186	3.94839	3.68527	0.819553	0.400028	2.85978	0.159902	10.4772	3.88026	8.01908	7.16144	1.74807	1.54904	3.73108	0.28342	2.83755	2.21694	119.855	0.503876	36.8848
8	Ibaraki	16	Basic organic chemical products	0	0	0	0	0.741345	0	0	0	0	0	0.329828	0.047817	0.360532	13.7866	86.5377	0	254.002	34.7603	0.295455	39.4537	2.43857	0	0	0.148688	1.18152	3.62061	0	0	0.445898	0	0	0	0	0	0	0	0	0.216105	0	0	0	0	0	0	0	0
8	Ibaraki	17	Organic chemical products	0.485588	0	0.100996	0	120.443	16.1843	11.6313	0.156318	5.47894	8.50817	78.4925	52.8847	1.68582	8.01453	555.855	0	952.885	1187.55	63.7077	859.995	570.451	0	1.30036	534.579	2200.82	41.1659	0.595282	0.474031	145.757	0	0	0	0	10.1501	25.3079	0.377692	3.28279	0.465358	0.462663	3.046	2.34272	4.92631	1.27257	104.876	9.1674	30.9207
8	Ibaraki	18	Synthetic resins	0	0	0	0	0	0	0.0907758	0	0.411096	20.5166	73.2497	20.0813	1.99223	0	0	0	0	1.17895	9.88644	201.502	0	0	0	3286.76	1.7978	149.692	0	0	16.1183	0	0	0	0	0	45.0621	0.100958	3.81084	0	0	2.8497	1.11327	20.5987	0	91.6485	14.7028	161.599
8	Ibaraki	19	Synthetic fibers	0	0	0	0	0	0	0	0	0	0	0	0	0	0	0	0	0	0	0	0	0	0	0	0	0	0	0	0	0	0	0	0	0	0	0	0	0	0	0	0	0	0	0	0	0	0
8	Ibaraki	20	Final chemical products	368.354	0	4.81278	0.466824	40.3103	2.42927	4.72603	10.9759	45.2376	56.1099	69.6252	42.5544	50.3636	3.25616	7.40111	0	31.0737	8.47722	0.894346	425.336	54.9603	0	12.2471	55.3061	31.3486	19.262	10.6272	0.119942	26.9273	0	0.0826326	11.4555	0.165153	0.288566	8.71231	13.8172	41.1756	8.47783	12.7212	6.98462	11.6358	12.1681	5.25923	58.0678	2.67645	55.3724
8	Ibaraki	21	Medicaments	12.591	0	0	0	1.28475	0	0	0.0757141	0	0	0	0	0	0	0	0	0	0	0	0.388178	85.5548	0	0	0	0	0	0	0	0	0	0	0	0	0	0	0	0	0	0	0	0	0	0	0	0	0
8	Ibaraki	22	Petroleum refinery products	266.654	0	10.9828	1.15194	169.754	38.1555	11.5295	5.65272	20.1053	5.2275	28.7615	12.1295	8.21751	36.8184	154.273	0	16.7828	4.14841	0.794486	46.0936	39.7511	0.0582616	96.4708	43.6701	29.1929	143.792	21.2682	7.59661	59.3522	0.348125	1.32539	25.51	1.63014	62.1876	17.7364	8.69588	48.1188	12.3002	19.7879	14.0161	3.16022	8.51352	1.05941	24.0883	1.97217	11.4015
8	Ibaraki	23	Coal products	0	0	0.177865	0	0	0	0	0	0.0846406	0	0.571806	0	0	6.4548	8.24212	0	87.2489	0	0	0.488564	0	0	0	0.451104	0	0	0	0	18.9393	0.294578	4.74491	50.3399	0.0862122	12.1513	1.09151	1.6629	0.330364	0	0.244441	0.167636	0	0.232387	0	0.0807252	0	0.0762672
8	Ibaraki	24	Plastic products	178.562	0	0.185229	0.830549	518.546	295.651	0.544983	52.6082	25.2095	154.3	66.9172	305.782	145.317	13.8026	81.2739	0	0.619912	0	0.777908	189.186	319.834	0	0	4073.4	277.623	87.5548	1.63765	1.30408	10.1259	0	0	0.607565	0	5.01993	80.2323	5.54159	27.4374	24.6656	39.0328	41.0255	48.7746	120.037	26.4513	1318.26	73.5582	1373.58
8	Ibaraki	25	Rubber products	12.8982	0	1.76309	0.998953	3.69899	0.281685	0.0290609	8.85542	0.559334	2.94329	2.13941	4.39866	0.9415	0.602196	0.567362	0	0.760298	0.319363	0	2.56389	4.94928	0	0.370924	4.00396	141.372	0.0328459	0.781088	0	3.38529	0.0858824	0.737787	2.26786	0.0670258	0.234224	0.495015	3.87847	3.6921	21.8227	56.9172	8.50395	8.01902	14.0621	4.87866	16.851	5.28021	72.0423
8	Ibaraki	26	Glass and glass products	0.955519	0	0	0	15.8409	113.603	0.0928125	1.75159	0.21016	77.6247	0	0	0	0	11.1918	0	1.26688	0	0	15.3658	62.1052	0	0	48.5367	2.56371	126.93	0.65076	0	4.09375	0	0	0	0	0	7.6224	0.980618	6.71607	1.47531	1.21388	0	2.13421	0.480842	2.73597	157.294	2.98726	14.2974
8	Ibaraki	27	Cement and cement products	0.0462978	0	0	0.191897	0	0	0	0	0	0	0	0	0	0	0	0	0	0	0	0.0440834	0	0	0.103318	0	0	0	244.242	0	2.05984	0	0	0	0	0	0	0	0.849555	0	0	0	0	0	0	0.0874066	0	0
8	Ibaraki	28	Pottery, china and earthenware	0	0	0	0	0.248976	0.0529676	0	0	0	1.0552	0	0	0	0	0.197682	0	0	0	0	0.0401757	0	0	0	0.0865557	0	0.00694832	0.0718408	0.562925	0	0	0	0.00685358	0	0	0	0	0.0882914	0.0134787	0.0335015	0	0.00628285	1.14021	0.0184294	0.398293	0.0127656	1.31077
8	Ibaraki	29	Other ceramic, stone and clay products	18.5895	0	0	0.154844	0.634874	0.0562769	0	0	0.207061	1.14201	4.57122	0.0253498	0.0273047	0.300776	54.9986	0	0.564661	0.939665	0	2.44732	3.54765	0	4.66865	2.10202	0.599138	56.638	33.3711	5.39744	70.2961	2.80536	0.1206	28.9523	0	26.2168	5.65833	3.83558	12.8444	33.3101	5.60971	8.99285	0.213612	11.0181	2.0103	46.2109	0.840918	21.5096
8	Ibaraki	30	Pig iron and crude steel	0	0	0	0	0	0	0	0	0	0	0	0	0	0	0.177712	0	0	0	0	0	0	0	0	0	0	0	0	0	-0.00473003	4.72554	0.101352	27.3785	0.33761	0	0	-0.106982	-1.21055	-0.284259	-0.679183	-0.0703358	-0.0170971	-0.138672	0	-0.853531	0	-0.537597
8	Ibaraki	31	steel products	1.41772	0	1.24751	6.78024	0	0	0	0.263299	2.80635	126.234	0	0	0	0	0	0	0	0	0	0	0	0	0	34.0364	37.6627	0	128.788	0	12.2916	0	645.683	638.338	1053.23	2.43322	7.65563	723.225	2066.75	471.243	420.821	506.006	15.7841	305.14	19.4343	355.052	61.4684	389.326
8	Ibaraki	32	Cast and forged steel products	0	0	0	0.0319482	0	0	0	0	0	0.976986	0	0	0	0	0	0	0	0	0	0	0	0	0	0	0	0	0.0944917	0.541764	0.487729	0	0	10.1263	0	0	0.721461	27.4284	34.4516	70.4407	81.1077	74.1575	3.30551	33.206	3.31281	12.6311	0.671622	7.12166
8	Ibaraki	33	Other iron or steel products	0	0	0	0	0	0	0	0	0.0321407	29.8263	0	0	0	0	1.07587	0	0.0161458	0	0	0.0773014	0	0	0	0.128474	0	0	2.4881	0.0792522	1.34847	0	0	3.37056	0	0	0.621722	62.4983	204.264	22.8583	28.2333	5.68136	1.14601	14.5751	0.0283678	27.4659	7.98761	9.49924
8	Ibaraki	34	Non-ferrous metals	0	0	0	0	0	0	0	0	0.0175658	0.496221	0.237338	0	-0.259432	0	80.6971	0	0.547094	0	0	15.5808	0	0	0	0.717747	-0.0161723	8.18922	0	1.55928	7.87861	0.611347	0.841494	1.79886	-0.0536758	209.831	1041.34	0.414128	57.0604	-0.425209	0.744035	0.869751	-0.0158563	5.96422	0.325579	387.183	0.177195	5.38152
8	Ibaraki	35	Non-ferrous metal products	0	0	0	0.64137	73.6029	4.98576	0	0	2.72271	40.188	0	3.20832	6.28316	0	14.0851	0	0	0	0	13.0312	9.06298	0	0	22.4317	13.4736	5.63999	0	0.469953	9.24734	0	0	0.469176	0	7.75303	345.337	183.945	385.299	142.756	83.6114	170.268	8.90932	275.905	48.903	1189.19	54.3065	790.042
8	Ibaraki	36	Metal products for construction and architecture	0.345643	0	0	0.298465	0	0	0	0	0.228065	4.50988	0	0	0	0	0	0	0	0	0	0	0	0	0	0	0	0	1.11816	0	0	0	0	0.168429	0	0	0.122545	41.6705	11.5722	2.70514	0	3.50065	0	0	0	0	0	0.924764
8	Ibaraki	37	Other metal products	20.4449	0	16.5706	10.9228	73.9962	377.64	0	11.7978	41.1013	146.449	6.31064	3.11894	1.03024	0	75.6053	0	33.2012	4.19632	0	46.5902	77.7297	0	1.69589	18.4055	168.429	14.2907	35.3612	6.31774	25.4488	0	0	33.7345	0.0494268	3.6272	12.2549	101.581	521.994	180.05	155.09	107.785	36.1378	97.5253	36.1052	166.889	32.6188	601.79
8	Ibaraki	38	General industrial machinery	0.462528	0	2.61113	0.547744	0	0	0	0	0.0653978	1.72428	0	0	0	0	0	0	0	0	0	0	0	0	0.0737268	60.8214	0	101.39	0.0675015	1.09655	5.87952	0	0	9.53063	0.532897	0.54315	1.19476	2.05575	10.7208	989.668	193.904	36.2021	21.6653	22.6838	11.7751	9.66775	21.7701	15.1445
8	Ibaraki	39	Special industrial machinery	0	0	0	0	0	0	0	0	0	0	0	0	0	0	0	0	0	0	0	0	0	0	0	0	0	0.848512	0	0	0	0	0	0	0	0	0	0	0	6.89744	713.453	0.040081	0.109607	0.0740837	0.107169	2.66354	0.259818	0
8	Ibaraki	40	Other general machines	0	0	0.247825	0.0342969	0	0	0	0	0.0393107	3.27598	0	0	0	0	0	0	0	0	0	0.0693337	0	0	0	0.442303	0	0.0392437	0.00676254	0.297258	0.569398	0	0	0.832236	0	0	0.211227	0.28962	0.850287	10.0233	11.3907	31.1429	0.573677	8.55651	1.30689	0.856073	0.919269	7.53893
8	Ibaraki	41	Machinery for office and service industry	0	0	0	0	0	0	0	0	0	0	0	0	0	0	0	0	0	0	0	0	0	0	0	0	0	0	0	0	0	0	0	0	0	0	0	0	0	0	0	0	216.019	0	0	0	0	0
8	Ibaraki	42	Industrial electric equipment	1.11332	0	0.0578887	0	0	0	0	0	0.055095	0.415039	0	0	0	0	0	0	0	0	0	0	0	0	0	0.0489394	0	0	0	0	0	0	0	0	0	0	0.0592079	2.97667	0.376326	72.7115	109.258	2.23694	17.5061	392.943	35.5467	25.3273	23.0898	258.449
8	Ibaraki	43	Applied electric equipment and electric mesuring instruments	0	0	0	0	0	0	0	0	0	0	0	0	0	0	0	0	0	0	0	0	0	0	0	0	0	0	0	0	0	0	0	0	0	0	0	0	0	3.00397	15.3987	0.930134	1.56725	4.40223	47.9818	0	0	1.5901
8	Ibaraki	44	Other electric equipment	0.963469	0	0.0238558	0	0.324869	0	0	0	0	0.876562	0	0	0	0	0.0690911	0	0	0	0	0.327638	0.0230765	0	0	0.0403356	0	0	0	0	0	0	0	0	0	0	0.0487989	0	1.39575	0.681505	3.19108	0.876869	1.53712	7.54277	5.00981	220.115	4.78885	81.7721
8	Ibaraki	45	Household electric and electric applications	0	0	0	0	0	0	0	0	0	0	0	0	0	0	0	0	0	0	0	0	0	0	0	0.0355713	0	0	0	0	0	0	0	0	0	0	0	0	0	0	0	0	0	0	0	0	67.8284	0
8	Ibaraki	46	Communication equipment	0.00418801	0	0	0	0	0.0157721	0	0.00337046	0	0.00390317	0.00350034	0	0.00382619	0	0.00420455	0	0	0	0	0	0.134815	0	0	0.00368194	0.0228974	0.00827598	0.00427839	0	0	0	0	0.00408157	0	0.019672	0.00445449	0.00814361	0.00808937	0.128433	0.0399029	0.00410477	0	0	0.076828	0.0316265	0.00380121	46.4633
8	Ibaraki	47	Electric computing equipment and accessory equipment	0	0	0	0	0	0	0	0	0	0	0	0	0	0	0	0	0	0	0	0	0	0	0	0	0	0	0	0	0	0	0	0	0	0	0	0	0	0	0.0660739	0	0	0	0	0	0	0.0120548
8	Ibaraki	48	Semiconductor devices and integrated circuits	0	0	0	0	0	0	0	0	0	0	0	0	0	0	0	0	0	0	0	0	0	0	0	0	0	0	0	0	0	0	0	0	0	0	0	0	0.122709	0.0573006	0.607667	0.212437	2.65316	3.43914	13.3909	0.496209	3.10918	100.94
8	Ibaraki	49	Other electrical equipment	0	0	0	0	0.0437381	0.0135697	0	0	0	0	0	0.0244497	0.711051	0	0	0	0	0	0	0	0.0289974	0	0	0.0126712	0	0	0	0	0	0	0	0	0	0	0.367917	0	2.64471	5.37298	7.34679	0.875831	23.9765	25.3009	134.176	3.08835	24.8289	1110.73
8	Ibaraki	50	Passenger motor cars	0	0	0	0	0	0	0	0	0	0	0	0	0	0	0	0	0	0	0	0	0	0	0	0	0	0	0	0	0	0	0	0	0	0	0	0	0	0	0	0	0	0	0	0	0	0
8	Ibaraki	51	Other cars	0	0	0	0	0	0	0	0	0	0	0	0	0	0	0	0	0	0	0	0	0	0	0	0	0	0	0	0	0	0	0	0	0	0	0	0	0	0	0	0	0	0	0	0	0	0
8	Ibaraki	52	Motor vheicle parts and accessories	0	0	0	0	0	0	0	0	0	0	0	0	0	0	0	0	0	0	0	0	0	0	0	0	0	0	0	0	0	0	0	0	0	0	0	0	0	0	0.718548	0	0	0	0	0	0	0
8	Ibaraki	53	Other transportation equipment	3.97188	0	0.00349745	0	0	0	0	0	0	0	0	0	0	0	0	0	0	0	0	0	0	0	0	0	0	0	0	0	0	0	0	0	0	0	0	0	0	0	0	0	0	0	0	0	0	0
8	Ibaraki	54	Precision instruments	0.844672	0	0	0.0243127	0.189874	0	0	0.0188828	0.0232225	0.0218673	0.254937	0.0398026	0	0	0.117779	0	0	0	0	0.0223409	0.141618	0	0	0.412558	0.0427605	0	0.0239695	0.068714	0.0231977	0	0	0.0228668	0	0	0	0.0684363	0.0453203	5.17168	18.3314	0.0919871	1.04813	3.01793	1.27078	0.0664447	0.0425922	53.3381
8	Ibaraki	55	Miscellaneous manufacturing products	4.36773	0	1.65369	0.307585	3.30294	4.4516	0	34.2808	2.74905	14.9192	0.318981	0.215807	0.0581125	0.0426761	0.0212863	0	0.23192	0	0	0.363393	0.021329	0	0.141947	0.726981	0.096602	3.51949	0.0866407	1.75933	2.85094	0	0	5.02129	0	0.0248984	2.6611	0.535972	0.737172	7.25397	0.343427	0.124687	0	0.307287	0.648261	0.50036	0.0769774	8.3011
8	Ibaraki	56	Reuse and recycling	1.44157	0	0	0	0.551764	36.2054	0	0	0	0	24.195	0	0	10.7044	7.51013	0	1.70468	0	0	0	0	0	0	77.7552	0.53254	15.9374	3.78121	1.48333	2.19568	5.60318	0.0786092	43.9326	1.49256	63.6419	106.792	0	0.075256	0	0	0	0	0	0	0.441335	0	0
8	Ibaraki	57	Building construction and repair of construction	0	0	0	0	0	0	0	0	0	0	0	0	0	0	0	0	0	0	0	0	0	0	0	0	0	0	0	0	0	0	0	0	0	0	0	0	0	0	0	0	0	0	0	0	0	0
8	Ibaraki	58	Public construction	0	0	0	0	0	0	0	0	0	0	0	0	0	0	0	0	0	0	0	0	0	0	0	0	0	0	0	0	0	0	0	0	0	0	0	0	0	0	0	0	0	0	0	0	0	0
8	Ibaraki	59	Other civil enginnering and construction	0	0	0	0	0	0	0	0	0	0	0	0	0	0	0	0	0	0	0	0	0	0	0	0	0	0	0	0	0	0	0	0	0	0	0	0	0	0	0	0	0	0	0	0	0	0
8	Ibaraki	60	Electricity	12.7639	0	1.96603	3.17063	25.1264	5.55078	0.84546	3.31121	5.41336	2.84154	25.8527	2.82243	2.95523	2.79894	31.0483	0	9.81804	1.55091	0.878175	7.34614	4.21037	0	0.798668	23.13	14.1601	13.0757	2.52861	0.624071	9.44301	1.23281	0.70004	29.5704	1.00252	24.0551	12.8031	2.47557	22.6383	5.67096	5.21123	5.67136	1.73299	3.22201	0.940305	17.1238	0.957153	9.29759
8	Ibaraki	61	Gas supply and heat supply	0	0	0	0	0	0	0	0	0	0	0	0	0	0	0	0	0	0	0	0	0	0	0	0	0	0	0	0	0	0	0	0	0	0	0	0	0	0	0	0	0	0	0	0	0	0
8	Ibaraki	62	Water supply and waste management services	0.0291241	0	0.00894189	0.00531719	0.205523	0.0899652	0.00824426	0.00625033	0.0094712	0.00853074	0.142458	0.0152923	0.00734887	0.0235877	0.122665	0	0.0706089	0.0553531	0.00314963	0.0874189	0.10868	0	0.00123796	0.0595007	0.0275497	0.0400127	0.045054	0.00243693	0.0460714	0.00119431	0.00475687	0.0223016	0.00307587	0.047718	0.0351076	0.0102477	0.0381729	0.039075	0.0528554	0.0180786	0.00334545	0.0146979	0.00557292	0.076192	0.00352456	0.0620896
8	Ibaraki	63	Commerce	15.126	0	0.451602	0.138899	44.4402	3.92588	0.328303	6.42631	5.19497	6.17826	10.5007	6.21571	2.73065	0.722447	4.84134	0	4.30723	1.33324	0.0861208	6.19392	5.41605	0	0.822	18.2829	10.2289	4.62021	2.37547	0.335247	2.49833	0.0572401	0.386679	3.90511	1.79247	6.08044	5.23519	3.60711	9.25782	6.65233	6.83758	3.45064	1.98147	4.91294	3.7945	15.0595	1.83503	39.7414
8	Ibaraki	64	Financial and insurance	0	0	0	0	0	0	0	0	0	0	0	0	0	0	0	0	0	0	0	0	0	0	0	0	0	0	0	0	0	0	0	0	0	0	0	0	0	0	0	0	0	0	0	0	0	0
8	Ibaraki	65	Real estate agencies and rental services	0	0	0	0	0	0	0	0	0	0	0	0	0	0	0	0	0	0	0	0	0	0	0	0	0	0	0	0	0	0	0	0	0	0	0	0	0	0	0	0	0	0	0	0	0	0
8	Ibaraki	66	House rent	0	0	0	0	0	0	0	0	0	0	0	0	0	0	0	0	0	0	0	0	0	0	0	0	0	0	0	0	0	0	0	0	0	0	0	0	0	0	0	0	0	0	0	0	0	0
8	Ibaraki	67	Transport	118.001	0	26.1489	2.37441	96.448	14.4129	0.812815	8.37009	21.1607	11.7481	18.7781	12.6742	7.06488	2.34698	14.3742	0	7.75525	3.29695	0.28403	12.9604	15.3741	0.00585804	2.87425	25.4922	12.6068	13.3836	30.8364	0.892774	12.9149	0.245021	1.15837	12.3197	3.5086	51.8301	15.0341	12.4977	26.4973	12.4357	11.1825	8.11209	2.40129	7.5016	3.9679	30.3782	1.89995	44.9268
8	Ibaraki	68	Communication	0	0	0	0	0	0	0	0	0	0	0	0	0	0	0	0	0	0	0	0	0	0	0	0	0	0	0	0	0	0	0	0	0	0	0	0	0	0	0	0	0	0	0	0	0	0
8	Ibaraki	69	Broadcasting	0	0	0	0	0	0	0	0	0	0	0	0	0	0	0	0	0	0	0	0	0	0	0	0	0	0	0	0	0	0	0	0	0	0	0	0	0	0	0	0	0	0	0	0	0	0
8	Ibaraki	70	Information services	0	0	0	0	0	0	0	0	0	0	0	0	0	0	0	0	0	0	0	0	0	0	0	0	0	0	0	0	0	0	0	0	0	0	0	0	0	0	0	0	0	0	0	0	0	0
8	Ibaraki	71	﻿Internet based services	0	0	0	0	0	0	0	0	0	0	0	0	0	0	0	0	0	0	0	0	0	0	0	0	0	0	0	0	0	0	0	0	0	0	0	0	0	0	0	0	0	0	0	0	0	0
8	Ibaraki	72	Image information production and distribution industry	0	0	0	0	0	0	0	0	0	0	0	0	0	0	0	0	0	0	0	0	0	0	0	0	0	0	0	0	0	0	0	0	0	0	0	0	0	0	0	0	0	0	0	0	0	0
8	Ibaraki	73	Public administration	0	0	0	0	0	0	0	0	0	0	0	0	0	0	0	0	0	0	0	0	0	0	0	0	0	0	0	0	0	0	0	0	0	0	0	0	0	0	0	0	0	0	0	0	0	0
8	Ibaraki	74	Education and Research	0.447816	0	0.0514435	0.375002	10.8007	2.16939	0.0728335	0.792037	0.126267	1.48017	0.922658	0.916465	0.0713596	1.89966	10.1941	0	4.16825	2.08059	0.181934	12.7721	56.1562	0	0.130728	14.4984	12.5764	13.1891	2.51615	0.607446	4.0208	0.0672631	0.30205	1.43364	0.00524946	3.23779	5.29758	2.13899	2.77347	5.29962	7.79673	1.84753	2.15863	11.254	11.0444	50.5544	3.64157	72.4287
8	Ibaraki	75	Medical service, health and social security and nursing care	0.00919525	0	0.00497247	0.00552636	0.0781329	0.025799	0.000803847	0.0190926	0.00509653	0.00651309	0.0161394	0.00826734	0.00470448	0.00333144	0.0193863	0	0.00859505	0.00337292	0.00064255	0.0194371	0.0764056	0	0.00143641	0.0289412	0.0368675	0.0125379	0.0107088	0.00107717	0.00581839	0.000158372	0.000927626	0.0150554	0.00296638	0.0103661	0.00606382	0.013589	0.0378312	0.0373635	0.0219028	0.034608	0.00575069	0.0124937	0.00546217	0.0343726	0.00233688	0.0779057
8	Ibaraki	76	Advertising and survery	0.071366	0	0.0494772	0.0262404	8.65515	2.80326	0.0120751	0.275439	0.0873433	0.542826	0.893435	1.26662	0.0504778	0.0810894	0.449918	0	0.0656242	0.0589772	0.00804347	2.20225	4.90344	0	0.00256871	1.02277	1.06846	0.160741	0.116023	0.0426994	0.147946	0.00264334	0.0193534	0.1406	0.0170194	0.123456	0.145285	0.199951	0.397238	0.430212	0.431377	0.267004	0.147403	0.328085	0.320427	1.52336	0.168554	3.66891
8	Ibaraki	77	Giids rental and leasing services	1.3863	0	0.187388	0.208524	2.48401	0.396269	0.073588	0.402238	0.337163	0.610459	0.452916	0.339146	0.31363	0.0344157	0.677402	0	0.112479	0.148184	0.00919096	0.33313	0.36915	0	0.252424	2.14271	1.23088	1.04615	1.38666	0.0847422	0.968798	0.0158573	0.049094	0.684508	0.104751	0.299641	0.723267	0.439901	3.00037	2.21088	2.19307	1.20019	0.276149	2.20168	0.69398	3.81162	0.230404	10.645
8	Ibaraki	78	Other business services	0.00124628	0	0.000135849	0.000122786	0.00238922	0.000348224	1.89865e-05	0.000498667	0.000281346	0.000326843	0.00025734	0.000293124	0.00038722	8.45374e-05	0.000829216	0	0.000229627	9.00996e-05	7.81157e-06	0.000382884	0.000838589	0	5.59516e-05	0.00154777	0.00134577	0.0012437	0.000661058	2.49434e-05	0.000441778	4.4008e-06	2.25546e-05	0.000690101	2.6725e-05	0.000637989	0.000556797	0.00055989	0.000974129	0.000899591	0.0006558	0.000326507	0.000130407	0.000517575	0.000430233	0.00158767	0.000148427	0.00287808
8	Ibaraki	79	Personal services	0.112057	0	0.00291328	0	0.0878476	0.0224191	0	0.0180364	0.0138634	0.011749	0.0175607	0.00950459	0.00767818	0.00281931	0.0267185	0	0.00696424	0.0061166	0	0.0133371	0.0267721	0	0	0.0406379	0.02808	0.0152238	0.0128784	0.00136737	0.00276972	0	0	0.00955575	0.00282417	0.0361869	0.0297967	0.00953289	0.0365248	0.0214776	0.0200187	0.0123558	0.00625714	0.0228379	0.0110124	0.0766882	0.00254268	0.112427
8	Ibaraki	80	Activities not elsewhere classified	0	0	0	0	0	0	0	0	0	0	0	0	0	0	0	0	0	0	0	0	0	0	0	0	0	0	0	0	0	0	0	0	0	0	0	0	0	0	0	0	0	0	0	0	0	0
9	Tochigi	1	Agriculture, forestry and fishery	344.784	0	0.00820392	0.155317	971.144	25.2904	0.075861	0.17142	108.711	0.00735235	0	0.0133827	0	0.0952716	0.720725	0	1.23945	0	0	1.01406	2.51569	0	0.114431	0	67.2923	0	0	0	0.140394	0	0	0	0	0	0.0251726	0	0	0	0	0	0	0	0	0	0	0
9	Tochigi	2	Metallic ores	0	0	0	0	0	0	0	0	0	0	0	0	0	0	0	0	0	0	0	0	0	0	0	0	0	0	0	0	0	0	0	0	0	0	0	0	0	0	0	0	0	0	0	0	0	0
9	Tochigi	3	Non-metallic ores	0.18123	0	0.439757	0	0	0	0	0	0	0	3.3324	0.0170799	0	3.95175	26.1396	0	2.0224	0	0	1.41885	0.263338	0	8.74025	0	1.28444	96.2381	62.3722	4.63916	44.9942	-0.0173409	0	0.647623	0	0.378347	0.0642541	0.039156	0.0777904	0	0	0.296047	0	0	0	0	0	0
9	Tochigi	4	Coal mining, crude petroleum and natural gas	0	0	0	0	0	0	0	0	0	0	0	0	0	0	0	0	0	0	0	0	0	0	0	0	0	0	0	0	0	0	0	0	0	0	0	0	0	0	0	0	0	0	0	0	0	0
9	Tochigi	5	Food and Tobacco	369.921	0	0	0	1022.15	84.1314	0	4.12266	0.0770535	0	4.94523	0.0132067	0	0.109689	0.547116	0	3.18951	0.0271971	0	4.35874	17.9657	0	0	0.232712	0	0.476917	0	0.0607992	1.23154	0	0	0.0151747	0	0	0	0	0	0	0	0	0	0	0	0	0	0
9	Tochigi	6	Beverage	9.50214	0	0	0	15.3686	23.5947	0	0	0	0	0	0	0	0	0	0	0.103833	0	0	0	0.472687	0	0	0	0	0	0	0	0	0	0	0	0	0	0	0	0	0	0	0	0	0	0	0	0	0
9	Tochigi	7	Textile products	1.59179	0	0	0	0.186443	0.00394389	2.90026	74.2405	0.0704814	1.92859	1.21138	5.56759	0.0765406	0.122255	0	0	0	0	0.0329305	0.00797713	0	0	0	0.508219	8.0311	0.140722	0.00427933	0	0.281625	0	0	0.00816492	0	0	0.245051	0.0203635	0.250825	0.0361296	0.075832	0.00410566	0	0	0	3.38873	0.627337	1.65123
9	Tochigi	8	Wearing aparel and other textile products	2.18668	0	0.16564	0.0495142	1.25444	0.132824	0.0338159	1.87702	0.24773	0.294773	0.281467	0.218091	0.0291038	0.128238	0.100514	0	0.0837184	0.0139108	0	0.164661	0.288413	0	0.177724	0.134031	0.27784	0.638503	0.134823	0.0533104	0.296958	0	0.00459094	0.208454	0.0229391	0.0480968	0.251702	0.099553	0.468079	0.246411	0.158264	0.278775	0.0345597	0.307103	0.155042	0.343665	0.105329	1.27034
9	Tochigi	9	Timber and wooden products	1.88984	0	0.0321653	0.0224351	1.03875	0.200935	0	0.0721877	24.0894	21.4124	0.00517031	0.585038	0.00565162	0.00311278	0	0	0.00307567	0.00540264	0	0.0677369	0	0	0	0.22298	0.00845534	0.794581	0.0442369	0.440833	0.504576	0	0	0.506421	0	0	1.06591	0.15036	0.737831	0.0592832	0.0795689	0.0303155	0.0746114	0.0784471	0.0270194	0.318246	0.0252662	0.681337
9	Tochigi	10	Furniture and fixtures	0.199315	0	0.31782	0.330451	5.60499	0.275228	0.0348481	1.12284	0.184119	31.1951	0.566398	0.619879	0.194235	0.0936078	0.947149	0	0.303901	0.150864	0	1.07543	2.1788	0	0.0148263	2.90882	1.00497	0.144418	0.325786	0.350227	0.630592	0	0.0536188	1.12664	0	0.0624151	0.593592	0.142109	0.744309	0.547564	0.455771	0.364659	0.0949722	0.493478	0.603593	3.54967	0.410054	41.6183
9	Tochigi	11	Pulp, paper, paperboard, building paper	0.227035	0	0	0	5.17651	0.0342007	0.0119084	0.171752	1.00219	2.7888	109.933	67.8155	19.9912	0	1.85536	0	0	0.888308	0	3.82631	0.803927	0	0	3.36926	1.22473	4.61657	0	0.37234	2.26711	0	0	0	0.0228879	0	0.492622	0.0176588	0.171027	0.100085	0.00432633	0.391639	0	2.76805	0.055532	3.73331	0.201945	3.9159
9	Tochigi	12	Paper products	85.0786	0	0	0	134.58	45.2569	0.276215	5.5095	0.312724	12.3287	1.40845	20.4037	0.962225	2.14109	5.70982	0	1.27771	0.349537	0.165593	24.71	45.6853	0	0.0235035	11.8521	1.24763	36.7136	0.19367	5.98382	4.31099	0	0	0	0.509649	0	1.68035	0.0204798	10.0496	2.07923	0.361257	1.94069	0.790414	2.63306	1.30646	15.3503	2.9443	28.5168
9	Tochigi	13	Publishing, printing	0.0818431	0	0.0222029	0.0331852	16.2771	0.867714	0.0591041	1.42615	0.126789	1.23038	0.118965	4.04441	7.56828	0.0716226	0.514433	0	0.0530765	0.0714785	0.0217573	3.52034	1.2636	0	0.0119114	0.294071	0.330736	1.93374	0.076339	0.0451581	0.211089	0.00306435	0.014359	0.558341	0.0035873	0.146253	0.295216	0.10033	1.15127	0.487651	0.728936	0.387132	0.782074	0.254634	0.376125	1.15213	0.717004	14.9979
9	Tochigi	14	Chemical fertilizer	89.6468	0	0	0	0.0227818	0.0742143	0	0.00906253	0	0	0	0.00955132	0	32.0262	7.55189	0	3.89676	0.599916	0	2.39104	0.985526	0	0	0	0.0307833	0.222525	0	0	0.1002	0	0.0227199	0	0	0.343813	0.0119773	0	0	0	0.0107291	0	0	0	0	0.786597	0	0
9	Tochigi	15	Basic inorganic chemical products	0.0221741	0	0.000315885	0	0.32816	0.065491	0.0387692	0.0579367	0.00030064	0.00566192	0.127701	0.0190657	0.000277513	0.395876	4.08792	0	0.838494	0.0838308	0.00159195	1.39986	0.770332	0	0.00135572	0.278534	2.12962	0.810644	0.00620621	0.0302456	0.02823	0.00627797	0.00306431	0.0219066	0.00122489	0.0802579	0.0297237	0.061428	0.0548583	0.0133906	0.011866	0.0285809	0.00217106	0.0217363	0.0169823	0.918118	0.00385981	0.282547
9	Tochigi	16	Basic organic chemical products	0	0	0	0	0	0	0	0	0	0	0	0	0	0	0	0	0	0	0	0	0	0	0	0	0	0	0	0	0	0	0	0	0	0	0	0	0	0	0	0	0	0	0	0	0	0
9	Tochigi	17	Organic chemical products	0.00374859	0	0.000779657	0	0.929779	0.124938	0.0897902	0.00120673	0.0422957	0.0656805	0.605938	0.408253	0.013014	0.0618697	4.29103	0	7.35598	9.16749	0.491804	6.6389	4.40371	0	0.0100384	4.12678	16.9896	0.317788	0.00459539	0.00365937	1.1252	0	0	0	0	0.0783556	0.195369	0.00291567	0.0253422	0.00359242	0.00357162	0.0235142	0.0180851	0.0380296	0.00982386	0.809614	0.0707695	0.238698
9	Tochigi	18	Synthetic resins	0	0	0	0	0	0	0.00343011	0	0.0155339	0.775254	2.76786	0.758804	0.0752796	0	0	0	0	0.0445487	0.373575	7.61407	0	0	0	124.196	0.0679327	5.65634	0	0	0.609056	0	0	0	0	0	1.70274	0.00381485	0.143999	0	0	0.107681	0.0420666	0.778355	0	3.46309	0.555568	6.10627
9	Tochigi	19	Synthetic fibers	0	0	0	0	6.31176	0	2.7963	7.49863	0.00996609	0.181434	0.25248	0.00569386	0	0	0	0	0	0	0	0	0	0	0.0262158	0.230168	0.0214094	0.726284	0	0	1.62938	0	0	0	0	0	0	0	0	0	0	0	0	0	0	0	0	0
9	Tochigi	20	Final chemical products	172.379	0	2.25225	0.218461	18.8641	1.13683	2.21165	5.1364	21.17	26.2579	32.5827	19.9143	23.5688	1.52379	3.46351	0	14.5417	3.96711	0.418529	199.046	25.7199	0	5.7313	25.8817	14.6703	9.01408	4.97324	0.0561296	12.6013	0	0.0386698	5.36086	0.0772869	0.135041	4.07712	6.46609	19.2691	3.96739	5.95315	3.26861	5.44525	5.69432	2.46118	27.1742	1.25251	25.9128
9	Tochigi	21	Medicaments	26.0247	0	0	0	2.6555	0	0	0.156496	0	0	0	0	0	0	0	0	0	0	0	0.802341	176.837	0	0	0	0	0	0	0	0	0	0	0	0	0	0	0	0	0	0	0	0	0	0	0	0	0
9	Tochigi	22	Petroleum refinery products	0.168713	0	0.00694884	0.000728839	0.107404	0.0241412	0.00729477	0.0035765	0.0127207	0.00330746	0.0181975	0.00767439	0.00519925	0.0232952	0.0976089	0	0.0106185	0.00262472	0.000502675	0.0291636	0.0251507	3.68623e-05	0.0610375	0.0276302	0.0184704	0.0909778	0.0134565	0.0048064	0.0375523	0.00022026	0.000838579	0.0161403	0.00103139	0.0393463	0.0112219	0.00550192	0.0304449	0.0077824	0.0125199	0.00886807	0.00199948	0.00538654	0.000670294	0.0152407	0.0012478	0.0072138
9	Tochigi	23	Coal products	0	0	0.00804404	0	0	0	0	0	0.00382792	0	0.0258603	0	0	0.291922	0.372754	0	3.94588	0	0	0.0220956	0	0	0	0.0204014	0	0	0	0	0.856539	0.0133224	0.214591	2.27665	0.003899	0.549549	0.0493642	0.0752054	0.0149409	0	0.011055	0.00758142	0	0.0105098	0	0.00365084	0	0.00344923
9	Tochigi	24	Plastic products	114.056	0	0.118315	0.530513	331.221	188.847	0.348107	33.6034	16.1025	98.5587	42.7433	195.318	92.8211	8.81642	51.9136	0	0.395968	0	0.496888	120.842	204.294	0	0	2601.88	177.331	55.9256	1.04605	0.832981	6.46789	0	0	0.388082	0	3.20648	51.2484	3.53969	17.5256	15.7551	24.9322	26.205	31.1548	76.6733	16.8957	842.04	46.9852	877.371
9	Tochigi	25	Rubber products	17.3969	0	2.37803	1.34737	4.98913	0.379933	0.0391969	11.944	0.75442	3.96986	2.8856	5.93284	1.26988	0.812232	0.765248	0	1.02548	0.430752	0	3.45813	6.67551	0	0.500296	5.40047	190.68	0.044302	1.05352	0	4.56602	0.115837	0.995115	3.05886	0.0904034	0.315918	0.667668	5.23121	4.97985	29.4341	76.769	11.47	10.8159	18.9668	6.58026	22.7284	7.12187	97.1695
9	Tochigi	26	Glass and glass products	0.155579	0	0	0	2.57923	18.4969	0.0151118	0.285196	0.0342185	12.6389	0	0	0	0	1.82225	0	0.206275	0	0	2.50188	10.112	0	0	7.9028	0.417427	20.6669	0.105958	0	0.666549	0	0	0	0	0	1.24109	0.159665	1.09352	0.240212	0.197645	0	0.347495	0.0782913	0.445474	25.6108	0.486389	2.32791
9	Tochigi	27	Cement and cement products	0.0176952	0	0	0.0733438	0	0	0	0	0	0	0	0	0	0	0	0	0	0	0	0.0168488	0	0	0.0394885	0	0	0	93.3501	0	0.787277	0	0	0	0	0	0	0	0.324703	0	0	0	0	0	0	0.0334071	0	0
9	Tochigi	28	Pottery, china and earthenware	0	0	0	0	0.15974	0.0339833	0	0	0	0.677001	0	0	0	0	0.12683	0	0	0	0	0.0257762	0	0	0	0.055533	0	0.00445795	0.0460921	0.361165	0	0	0	0.00439717	0	0	0	0	0.0566466	0.00864773	0.0214941	0	0.00403099	0.731547	0.0118241	0.25554	0.00819027	0.840973
9	Tochigi	29	Other ceramic, stone and clay products	4.14206	0	0	0.034502	0.141461	0.0125394	0	0	0.0461367	0.25446	1.01855	0.00564836	0.00608395	0.0670181	12.2546	0	0.125816	0.209373	0	0.545304	0.790477	0	1.04025	0.468366	0.133498	12.6199	7.43565	1.20264	15.6632	0.625081	0.0268717	6.45107	0	5.84155	1.26077	0.854632	2.86196	7.42205	1.24994	2.00376	0.0475964	2.45502	0.447929	10.2966	0.187371	4.79272
9	Tochigi	30	Pig iron and crude steel	0	0	0	0	0	0	0	0	0	0	0	0	0	0	0.516824	0	0	0	0	0	0	0	0	0	0	0	0	0	-0.0137559	13.7429	0.294753	79.6224	0.98184	0	0	-0.311126	-3.52053	-0.826684	-1.97521	-0.204551	-0.0497219	-0.403288	0	-2.48225	0	-1.56344
9	Tochigi	31	steel products	0.0882942	0	0.0776939	0.422268	0	0	0	0.0163981	0.174778	7.86178	0	0	0	0	0	0	0	0	0	0	0	0	0	2.11976	2.34561	0	8.02084	0	0.765515	0	40.2126	39.7552	65.5946	0.151539	0.476787	45.0419	128.716	29.3486	26.2084	31.5136	0.983021	19.0039	1.21035	22.1124	3.82821	24.2469
9	Tochigi	32	Cast and forged steel products	0	0	0	0.0140593	0	0	0	0	0	0.429937	0	0	0	0	0	0	0	0	0	0	0	0	0	0	0	0	0.0415824	0.238411	0.214632	0	0	4.4562	0	0	0.317489	12.0702	15.1609	30.9985	35.6926	32.6341	1.45464	14.6128	1.45785	5.55851	0.295557	3.13399
9	Tochigi	33	Other iron or steel products	0	0	0	0	0	0	0	0	0.0317298	29.4449	0	0	0	0	1.06211	0	0.0159394	0	0	0.076313	0	0	0	0.126831	0	0	2.45628	0.0782388	1.33123	0	0	3.32746	0	0	0.613773	61.6991	201.652	22.566	27.8724	5.60872	1.13136	14.3888	0.0280051	27.1147	7.88547	9.37778
9	Tochigi	34	Non-ferrous metals	0	0	0	0	0	0	0	0	0.00981082	0.277149	0.132558	0	-0.144898	0	45.0709	0	0.305563	0	0	8.70217	0	0	0	0.400876	-0.00903253	4.57384	0	0.87089	4.40036	0.341449	0.469991	1.0047	-0.029979	117.195	581.606	0.231299	31.8694	-0.237488	0.415558	0.485773	-0.00885606	3.33113	0.181842	216.249	0.0989668	3.00568
9	Tochigi	35	Non-ferrous metal products	0	0	0	0.339979	39.0156	2.64287	0	0	1.44326	21.303	0	1.70067	3.33059	0	7.46628	0	0	0	0	6.90764	4.80413	0	0	11.8907	7.14213	2.98966	0	0.249114	4.90185	0	0	0.248702	0	4.10975	183.057	97.5062	204.241	75.6727	44.321	90.2561	4.72268	146.253	25.9226	630.367	28.787	418.788
9	Tochigi	36	Metal products for construction and architecture	0.214806	0	0	0.185487	0	0	0	0	0.141736	2.80276	0	0	0	0	0	0	0	0	0	0	0	0	0	0	0	0	0.6949	0	0	0	0	0.104674	0	0	0.0761582	25.8969	7.19178	1.68117	0	2.17555	0	0	0	0	0	0.574712
9	Tochigi	37	Other metal products	11.3887	0	9.23051	6.08448	41.219	210.362	0	6.5719	22.8952	81.5785	3.51529	1.73738	0.573885	0	42.1154	0	18.4944	2.33753	0	25.9527	43.2987	0	0.94468	10.2526	93.8222	7.96052	19.6977	3.51925	14.1761	0	0	18.7915	0.0275328	2.0205	6.82647	56.5849	290.773	100.296	86.3918	60.041	20.1303	54.3257	20.1121	92.9644	18.17	335.222
9	Tochigi	38	General industrial machinery	0.0805065	0	0.454487	0.095339	0	0	0	0	0.011383	0.300124	0	0	0	0	0	0	0	0	0	0	0	0	0.0128327	10.5864	0	17.6476	0.0117491	0.190862	1.02338	0	0	1.65888	0.0927547	0.0945394	0.207957	0.357818	1.86603	172.259	33.7505	6.30124	3.77101	3.94828	2.04954	1.68274	3.78926	2.63602
9	Tochigi	39	Special industrial machinery	0	0	0	0	0	0	0	0	0	0	0	0	0	0	0	0	0	0	0	0	0	0	0	0	0	0.300379	0	0	0	0	0	0	0	0	0	0	0	2.44174	252.568	0.0141889	0.0388015	0.0262261	0.0379387	0.942913	0.0919775	0
9	Tochigi	40	Other general machines	0	0	0.265557	0.0367509	0	0	0	0	0.0421235	3.51038	0	0	0	0	0	0	0	0	0	0.0742946	0	0	0	0.473951	0	0.0420517	0.00724641	0.318527	0.610139	0	0	0.891783	0	0	0.22634	0.310343	0.911126	10.7405	12.2057	33.3712	0.614724	9.16874	1.4004	0.917326	0.985044	8.07836
9	Tochigi	41	Machinery for office and service industry	0	0	0	0	0	0	0	0	0	0	0	0	0	0	0	0	0	0	0	0	0	0	0	0	0	0	0	0	0	0	0	0	0	0	0	0	0	0	0	0	60.8925	0	0	0	0	0
9	Tochigi	42	Industrial electric equipment	0.255435	0	0.0132818	0	0	0	0	0	0.0126408	0.0952249	0	0	0	0	0	0	0	0	0	0	0	0	0	0.0112285	0	0	0	0	0	0	0	0	0	0	0.0135844	0.682956	0.0863427	16.6826	25.0677	0.513234	4.01653	90.1552	8.15568	5.811	5.29762	59.2976
9	Tochigi	43	Applied electric equipment and electric mesuring instruments	0	0	0	0	0	0	0	0	0	0	0	0	0	0	0	0	0	0	0	0	0	0	0	0	0	0	0	0	0	0	0	0	0	0	0	0	0	2.45601	12.5898	0.760467	1.28137	3.59921	39.2293	0	0	1.30005
9	Tochigi	44	Other electric equipment	1.59798	0	0.0395665	0	0.538817	0	0	0	0	1.45384	0	0	0	0	0.114592	0	0	0	0	0.54341	0.038274	0	0	0.0668993	0	0	0	0	0	0	0	0	0	0	0.0809363	0	2.31494	1.13032	5.29263	1.45435	2.54942	12.5102	8.30912	365.076	7.94263	135.625
9	Tochigi	45	Household electric and electric applications	0	0	0	0	0	0	0	0	0	0	0	0	0	0	0	0	0	0	0	0	0	0	0	0.0350864	0	0	0	0	0	0	0	0	0	0	0	0	0	0	0	0	0	0	0	0	66.9037	0
9	Tochigi	46	Communication equipment	0.0590551	0	0	0	0	0.222403	0	0.0475269	0	0.0550386	0.0493583	0	0.0539532	0	0.0592883	0	0	0	0	0	1.90103	0	0	0.0519191	0.322876	0.1167	0.0603296	0	0	0	0	0.0575542	0	0.277395	0.0628128	0.114833	0.114068	1.81103	0.56267	0.0578813	0	0	1.08335	0.445965	0.0536008	655.179
9	Tochigi	47	Electric computing equipment and accessory equipment	0	0	0	0	0	0	0	0	0	0	0	0	0	0	0	0	0	0	0	0	0	0	0	0	0	0	0	0	0	0	0	0	0	0	0	0	0	0	0.0604286	0	0	0	0	0	0	0.0110249
9	Tochigi	48	Semiconductor devices and integrated circuits	0	0	0	0	0	0	0	0	0	0	0	0	0	0	0	0	0	0	0	0	0	0	0	0	0	0	0	0	0	0	0	0	0	0	0	0	0.165014	0.0770555	0.817166	0.285676	3.56787	4.62482	18.0075	0.667282	4.1811	135.74
9	Tochigi	49	Other electrical equipment	0	0	0	0	0.0321013	0.00995938	0	0	0	0	0	0.0179447	0.521871	0	0	0	0	0	0	0	0.0212824	0	0	0.00929993	0	0	0	0	0	0	0	0	0	0	0.27003	0	1.94107	3.94346	5.39213	0.64281	17.5974	18.5695	98.4776	2.26667	18.223	815.213
9	Tochigi	50	Passenger motor cars	0	0	0	0	0	0	0	0	0	0	0	0	0	0	0	0	0	0	0	0	0	0	0	0	0	0	0	0	0	0	0	0	0	0	0	0	0	0	0	0	0	0	0	0	0	0
9	Tochigi	51	Other cars	0	0	0	0	0	0	0	0	0	0	0	0	0	0	0	0	0	0	0	0	0	0	0	0	0	0	0	0	0	0	0	0	0	0	0	0	0	0	0	0	0	0	0	0	0	0
9	Tochigi	52	Motor vheicle parts and accessories	0	0	0	0	0	0	0	0	0	0	0	0	0	0	0	0	0	0	0	0	0	0	0	0	0	0	0	0	0	0	0	0	0	0	0	0	0	0	1.70766	0	0	0	0	0	0	0
9	Tochigi	53	Other transportation equipment	26.2215	0	0.0230894	0	0	0	0	0	0	0	0	0	0	0	0	0	0	0	0	0	0	0	0	0	0	0	0	0	0	0	0	0	0	0	0	0	0	0	0	0	0	0	0	0	0	0
9	Tochigi	54	Precision instruments	0.749916	0	0	0.0215853	0.168574	0	0	0.0167646	0.0206174	0.0194142	0.226338	0.0353376	0	0	0.104566	0	0	0	0	0.0198347	0.125731	0	0	0.366277	0.0379636	0	0.0212806	0.0610056	0.0205954	0	0	0.0203016	0	0	0	0.0607591	0.0402362	4.59152	16.275	0.081668	0.930548	2.67938	1.12822	0.0589909	0.0378142	47.3546
9	Tochigi	55	Miscellaneous manufacturing products	1.91528	0	0.725154	0.134878	1.44836	1.95205	0	15.0323	1.20548	6.54216	0.139875	0.0946328	0.0254827	0.0187137	0.00933418	0	0.101698	0	0	0.15935	0.00935288	0	0.0622445	0.318785	0.0423605	1.54332	0.0379924	0.771474	1.25015	0	0	2.20186	0	0.0109181	1.16691	0.235027	0.323254	3.18091	0.150595	0.054676	0	0.134747	0.284266	0.219411	0.033755	3.64008
9	Tochigi	56	Reuse and recycling	0.49435	0	0	0	0.189213	12.4157	0	0	0	0	8.29707	0	0	3.67081	2.57541	0	0.584578	0	0	0	0	0	0	26.6642	0.182621	5.46531	1.29667	0.50867	0.752952	1.92147	0.026957	15.0656	0.511835	21.8244	36.6217	0	0.0258071	0	0	0	0	0	0	0.151345	0	0
9	Tochigi	57	Building construction and repair of construction	0	0	0	0	0	0	0	0	0	0	0	0	0	0	0	0	0	0	0	0	0	0	0	0	0	0	0	0	0	0	0	0	0	0	0	0	0	0	0	0	0	0	0	0	0	0
9	Tochigi	58	Public construction	0	0	0	0	0	0	0	0	0	0	0	0	0	0	0	0	0	0	0	0	0	0	0	0	0	0	0	0	0	0	0	0	0	0	0	0	0	0	0	0	0	0	0	0	0	0
9	Tochigi	59	Other civil enginnering and construction	0	0	0	0	0	0	0	0	0	0	0	0	0	0	0	0	0	0	0	0	0	0	0	0	0	0	0	0	0	0	0	0	0	0	0	0	0	0	0	0	0	0	0	0	0	0
9	Tochigi	60	Electricity	0.0154196	0	0.0023751	0.00383033	0.0303543	0.0067057	0.00102137	0.00400016	0.00653969	0.00343277	0.0312318	0.00340968	0.00357011	0.0033813	0.0375084	0	0.0118608	0.0018736	0.00106089	0.00887461	0.0050864	0	0.000964844	0.0279426	0.0171063	0.0157963	0.00305472	0.000753919	0.0114078	0.00148931	0.000845694	0.035723	0.00121111	0.0290601	0.015467	0.00299065	0.0273486	0.00685089	0.00629551	0.00685137	0.00209357	0.00389239	0.00113595	0.0206867	0.0011563	0.0112321
9	Tochigi	61	Gas supply and heat supply	0.000266482	0	9.23744e-05	0.000184088	0.0630776	0.0345398	0.00194132	0.00107231	0.000439582	0.00157293	0.00645906	0.00376715	8.11534e-05	0.0118895	0.0143577	0	0.00609471	0.00325829	0.000232767	0.0103186	0.0156375	0	0.000396454	0.0197577	0.0123032	0.111551	0.00108893	0.00494265	0.00658669	0.000458968	0.00277791	0.037831	0.000179098	0.00239914	0.0324065	0.00535449	0.027452	0.00408608	0.00465486	0.00269892	0.000793607	0.00571269	0.00155192	0.0627194	0.000161247	0.02028
9	Tochigi	62	Water supply and waste management services	0.126649	0	0.0388848	0.0231224	0.89374	0.391223	0.035851	0.0271802	0.0411865	0.0370968	0.619495	0.0665001	0.0319573	0.102574	0.533421	0	0.30705	0.240709	0.0136965	0.38015	0.472608	0	0.00538342	0.258745	0.119803	0.173999	0.195922	0.0105973	0.200346	0.00519358	0.0206857	0.0969809	0.0133758	0.207507	0.152669	0.0445631	0.165999	0.169922	0.229847	0.0786168	0.0145481	0.0639152	0.0242344	0.331329	0.0153269	0.270003
9	Tochigi	63	Commerce	50.0883	0	1.49544	0.459949	147.159	13.0002	1.08714	21.2801	17.2026	20.4587	34.7721	20.5827	9.04229	2.39231	16.0316	0	14.263	4.41488	0.285181	20.5105	17.9347	0	2.72197	60.542	33.8721	15.2994	7.86615	1.11014	8.27297	0.189545	1.28045	12.9314	5.9356	20.1348	17.3358	11.9446	30.6564	22.0285	22.642	11.4265	6.56144	16.2687	12.5651	49.8681	6.07651	131.6
9	Tochigi	64	Financial and insurance	0.0526904	0	0.010543	0.00391537	0.0553341	0.0100705	0.00266289	0.0247205	0.010598	0.0133928	0.0120397	0.0103446	0.00590577	0.0038846	0.016878	0	0.00861301	0.00478251	0.000253884	0.0256276	0.0129354	0	0.000415124	0.0117138	0.0158172	0.0209991	0.0142883	0.0015322	0.00858661	0.000220267	0.0010204	0.00762565	0.00198081	0.028671	0.0246951	0.0102186	0.0170223	0.0127129	0.0131157	0.0106773	0.00121531	0.00472851	0.00317891	0.0267675	0.00179393	0.048681
9	Tochigi	65	Real estate agencies and rental services	0	0	0	0	0	0	0	0	0	0	0	0	0	0	0	0	0	0	0	0	0	0	0	0	0	0	0	0	0	0	0	0	0	0	0	0	0	0	0	0	0	0	0	0	0	0
9	Tochigi	66	House rent	0	0	0	0	0	0	0	0	0	0	0	0	0	0	0	0	0	0	0	0	0	0	0	0	0	0	0	0	0	0	0	0	0	0	0	0	0	0	0	0	0	0	0	0	0	0
9	Tochigi	67	Transport	37.9009	0	8.39877	0.762637	30.9782	4.6293	0.261069	2.6884	6.79661	3.77338	6.03136	4.07085	2.26917	0.753828	4.61686	0	2.49091	1.05895	0.0912277	4.16275	4.93802	0.00188155	0.923181	8.18787	4.04919	4.29869	9.90435	0.286751	4.14816	0.0786983	0.372059	3.95698	1.12693	16.6473	4.82883	4.01415	8.51068	3.99423	3.59172	2.60553	0.771272	2.40944	1.27445	9.7572	0.610246	14.4301
9	Tochigi	68	Communication	0.0424319	0	0.00910543	0.0232055	0.069323	0.0248894	0.00294396	0.0418729	0.0114991	0.0316996	0.024769	0.024565	0.0223059	0.00406695	0.0431066	0	0.0110508	0.0054411	0.000588309	0.0309431	0.48156	0	0.00375757	0.0716485	0.100499	0.0342721	0.0178895	0.00213685	0.0186453	0	0.0023781	0.0277331	0.00135799	0.0864083	0.045311	0.0710496	0.0733408	0.092301	0.0575948	0.0462095	0.00992875	0.0350797	0.029271	0.112533	0.0099339	0.227052
9	Tochigi	69	Broadcasting	0	0	0	0	0	0	0	0	0	0	0	0	0	0	0	0	0	0	0	0	0	0	0	0	0	0	0	0	0	0	0	0	0	0	0	0	0	0	0	0	0	0	0	0	0	0
9	Tochigi	70	Information services	0.746816	0	0.0233458	0.0356688	1.64412	0.703131	0.0117751	0.172239	0.173309	0.528643	0.359003	0.255156	0.180487	0.140076	0.286985	0	0.351222	0.179072	0.00784364	0.418962	2.58954	0	0.025049	1.15525	0.795076	0.527914	0.273678	0.0613622	0.412835	0.0115995	0.0468041	0.34131	0.0950533	0.720574	0.67654	0.339038	1.45842	0.879209	1.48158	0.511941	0.151095	1.07503	1.327	3.41745	0.0692784	6.00498
9	Tochigi	71	﻿Internet based services	0.00214747	0	0.000744409	0.00111262	0.0206368	0.0104463	0.000625772	0.0109457	0.0042509	0.0100071	0.00388887	0.00425012	0.0075208	0.000720398	0.00898315	0	0.00284723	0.000937758	0	0.00647507	0.104773	0	0.000399358	0.0286344	0.0153286	0.00884094	0.00438764	0.000349394	0.00353864	0	0.000361065	0.0087204	0.000360819	0.0226961	0.0118013	0.0156592	0.0217768	0.017836	0.0150047	0.00701597	0.00159884	0.0116712	0.00969239	0.0398669	0.00259885	0.0877792
9	Tochigi	72	Image information production and distribution industry	0.00169652	0	0.000793921	0.000732481	0.00623528	0.000585671	0.000593239	0.00632609	0.000839562	0.00337309	0.00243416	0.00314178	0.000929973	0.00492289	0.00411612	0	0.000871619	0.000469197	4.9396e-05	0.00301537	0.0133118	0	0.000283946	0.00614009	0.00976505	0.00642567	0.00352404	0.000662457	0.00371809	2.43496e-05	0.000114098	0.00159829	0.00022804	0.00268952	0.00144358	0.00247417	0.0118516	0.00401041	0.00447212	0.00191222	0.00108626	0.00335518	0.00306283	0.0175359	0.000923901	0.0347236
9	Tochigi	73	Public administration	0	0	0	0	0	0	0	0	0	0	0	0	0	0	0	0	0	0	0	0	0	0	0	0	0	0	0	0	0	0	0	0	0	0	0	0	0	0	0	0	0	0	0	0	0	0
9	Tochigi	74	Education and Research	0.157883	0	0.018137	0.132211	3.80791	0.764842	0.0256783	0.279241	0.0445169	0.52185	0.325293	0.32311	0.0251586	0.669745	3.59403	0	1.46956	0.733533	0.064143	4.50294	19.7985	0	0.0460897	5.11156	4.43395	4.64998	0.887095	0.214162	1.41758	0.0237143	0.106491	0.505445	0.00185076	1.14152	1.86772	0.754123	0.977819	1.86844	2.74882	0.651367	0.761048	3.96773	3.89383	17.8235	1.28388	25.5355
9	Tochigi	75	Medical service, health and social security and nursing care	0.00622441	0	0.00336594	0.00374088	0.0528894	0.0174637	0.000544137	0.0129241	0.00344992	0.00440882	0.010925	0.0055963	0.00318454	0.00225511	0.0131229	0	0.00581813	0.00228318	0.000434953	0.0131573	0.0517202	0	0.000972326	0.0195908	0.0249562	0.0084871	0.00724897	0.000729152	0.00393856	0.000107204	0.000627925	0.0101913	0.00200799	0.007017	0.0041047	0.0091986	0.0256086	0.025292	0.0148264	0.0234267	0.00389274	0.00845718	0.00369743	0.0232674	0.00158187	0.0527357
9	Tochigi	76	Advertising and survery	0.132623	0	0.0919459	0.0487638	16.0843	5.20943	0.0224398	0.511862	0.162314	1.00876	1.66031	2.35383	0.0938054	0.150692	0.836105	0	0.121953	0.1096	0.0149476	4.09255	9.1123	0	0.00477356	1.90066	1.98557	0.298713	0.215611	0.0793504	0.274935	0.00491224	0.0359654	0.261284	0.031628	0.229424	0.26999	0.371578	0.738206	0.799485	0.80165	0.496187	0.273926	0.609696	0.595465	2.83093	0.313232	6.81811
9	Tochigi	77	Giids rental and leasing services	2.09658	0	0.283397	0.315362	3.75669	0.599298	0.111291	0.608325	0.509909	0.923229	0.684969	0.512909	0.474319	0.0520486	1.02447	0	0.170108	0.224106	0.0139	0.503809	0.558285	0	0.381754	3.24052	1.86152	1.58215	2.09712	0.12816	1.46516	0.0239818	0.0742474	1.03522	0.15842	0.453162	1.09383	0.665286	4.53761	3.34363	3.31669	1.8151	0.417635	3.32972	1.04954	5.7645	0.348451	16.099
9	Tochigi	78	Other business services	0.836338	0	0.0911639	0.0823979	1.60333	0.233682	0.0127413	0.33464	0.188802	0.219334	0.172693	0.196706	0.259851	0.0567304	0.556461	0	0.154095	0.060463	0.00524211	0.256942	0.562751	0	0.0375474	1.03866	0.903107	0.834608	0.443616	0.0167387	0.296464	0.00295324	0.0151357	0.463105	0.0179344	0.428135	0.373649	0.375725	0.653708	0.603688	0.440087	0.219109	0.0875123	0.347328	0.288716	1.06544	0.0996045	1.93139
9	Tochigi	79	Personal services	0.0856959	0	0.00222795	0	0.067182	0.0171452	0	0.0137934	0.0106021	0.0089851	0.0134296	0.00726869	0.00587193	0.00215609	0.0204332	0	0.00532595	0.00467771	0	0.0101996	0.0204741	0	0	0.031078	0.0214743	0.0116425	0.00984885	0.0010457	0.00211816	0	0	0.00730782	0.0021598	0.0276742	0.0227872	0.00729034	0.0279326	0.0164251	0.0153094	0.00944917	0.00478518	0.0174654	0.00842181	0.0586478	0.00194453	0.0859795
9	Tochigi	80	Activities not elsewhere classified	0	0	0	0	0	0	0	0	0	0	0	0	0	0	0	0	0	0	0	0	0	0	0	0	0	0	0	0	0	0	0	0	0	0	0	0	0	0	0	0	0	0	0	0	0	0
10	Gunma	1	Agriculture, forestry and fishery	339.646	0	0.00808165	0.153002	956.671	24.9135	0.0747305	0.168865	107.091	0.00724278	0	0.0131832	0	0.0938518	0.709984	0	1.22098	0	0	0.998949	2.4782	0	0.112726	0	66.2894	0	0	0	0.138302	0	0	0	0	0	0.0247975	0	0	0	0	0	0	0	0	0	0	0
10	Gunma	2	Metallic ores	0	0	0	0	0	0	0	0	0	0	0	0	0	0	0	0	0	0	0	0	0	0	0	0	0	0	0	0	0	0	0	0	0	0	0	0	0	0	0	0	0	0	0	0	0	0
10	Gunma	3	Non-metallic ores	0.0306355	0	0.0743373	0	0	0	0	0	0	0	0.563315	0.00288721	0	0.66801	4.41868	0	0.34187	0	0	0.239844	0.0445151	0	1.47747	0	0.217124	16.2682	10.5435	0.784211	7.6059	-0.00293134	0	0.109475	0	0.0639564	0.0108616	0.00661899	0.0131498	0	0	0.0500443	0	0	0	0	0	0
10	Gunma	4	Coal mining, crude petroleum and natural gas	0	0	0	0	0	0	0	0	0	0	0	0	0	0	0	0	0	0	0	0	0	0	0	0	0	0	0	0	0	0	0	0	0	0	0	0	0	0	0	0	0	0	0	0	0	0
10	Gunma	5	Food and Tobacco	257.088	0	0	0	710.376	58.4697	0	2.86517	0.0535507	0	3.43684	0.00917844	0	0.0762318	0.380235	0	2.21665	0.0189015	0	3.02924	12.4858	0	0	0.16173	0	0.331448	0	0.0422543	0.855898	0	0	0.0105461	0	0	0	0	0	0	0	0	0	0	0	0	0	0
10	Gunma	6	Beverage	15.5137	0	0	0	25.0916	38.5219	0	0	0	0	0	0	0	0	0	0	0.169524	0	0	0	0.771734	0	0	0	0	0	0	0	0	0	0	0	0	0	0	0	0	0	0	0	0	0	0	0	0	0
10	Gunma	7	Textile products	10.6611	0	0	0	1.24871	0.0264145	19.4247	497.231	0.472054	12.9169	8.11333	37.2894	0.512636	0.818811	0	0	0	0	0.220554	0.0534274	0	0	0	3.40383	53.7888	0.942498	0.0286611	0	1.8862	0	0	0.0546851	0	0	1.64124	0.136386	1.67992	0.241981	0.50789	0.027498	0	0	0	22.6962	4.20163	11.0592
10	Gunma	8	Wearing aparel and other textile products	7.52841	0	0.570273	0.17047	4.31884	0.457292	0.116423	6.46228	0.852895	1.01486	0.969047	0.750852	0.1002	0.441503	0.346054	0	0.288229	0.0478929	0	0.566902	0.99296	0	0.611876	0.46145	0.956558	2.19827	0.464174	0.183539	1.02238	0	0.0158059	0.717674	0.0789756	0.16559	0.866571	0.342746	1.61152	0.848353	0.544878	0.959779	0.118984	1.05731	0.533786	1.18319	0.362631	4.37357
10	Gunma	9	Timber and wooden products	4.61215	0	0.0784995	0.054753	2.53508	0.490381	0	0.176174	58.7901	52.2569	0.0126181	1.42779	0.0137928	0.00759675	0	0	0.00750618	0.0131851	0	0.165312	0	0	0	0.544184	0.0206353	1.93918	0.10796	1.07585	1.23142	0	0	1.23592	0	0	2.60135	0.366954	1.80068	0.144681	0.194188	0.0739849	0.182089	0.19145	0.0659408	0.77668	0.0616622	1.6628
10	Gunma	10	Furniture and fixtures	0.320918	0	0.511724	0.532062	9.02465	0.443148	0.0561092	1.8079	0.296452	50.2275	0.911962	0.998073	0.31274	0.150719	1.52501	0	0.489314	0.242907	0	1.73156	3.5081	0	0.023872	4.68352	1.61811	0.232529	0.524551	0.563904	1.01532	0	0.0863322	1.81402	0	0.100495	0.955748	0.22881	1.19842	0.881638	0.733842	0.587141	0.152916	0.794553	0.97185	5.71535	0.660232	67.01
10	Gunma	11	Pulp, paper, paperboard, building paper	0.0738629	0	0	0	1.68411	0.0111268	0.00387425	0.0558774	0.32605	0.907302	35.7654	22.0629	6.50388	0	0.603619	0	0	0.289	0	1.24484	0.261547	0	0	1.09615	0.398451	1.50194	0	0.121136	0.737577	0	0	0	0.00744628	0	0.160268	0.00574508	0.0556414	0.0325614	0.00140751	0.127415	0	0.900548	0.0180666	1.21458	0.0657002	1.27399
10	Gunma	12	Paper products	78.694	0	0	0	124.48	41.8607	0.255487	5.09604	0.289256	11.4035	1.30275	18.8725	0.890015	1.98041	5.28133	0	1.18183	0.323307	0.153166	22.8556	42.2569	0	0.0217397	10.9627	1.15401	33.9585	0.179136	5.53477	3.98747	0	0	0	0.471403	0	1.55425	0.0189429	9.29548	1.9232	0.334147	1.79505	0.731098	2.43547	1.20842	14.1984	2.72335	26.3768
10	Gunma	13	Publishing, printing	0.236874	0	0.0642608	0.0960462	47.1098	2.51138	0.171062	4.12763	0.366957	3.56102	0.344313	11.7055	21.9045	0.207294	1.4889	0	0.153616	0.206876	0.0629711	10.1887	3.65718	0	0.0344744	0.851113	0.957231	5.59673	0.220944	0.130699	0.610943	0.00886898	0.0415584	1.61598	0.0103825	0.423291	0.854428	0.29038	3.33205	1.41138	2.10972	1.12045	2.26351	0.736975	1.0886	3.33455	2.07519	43.4076
10	Gunma	14	Chemical fertilizer	73.9782	0	0	0	0.0188	0.0612431	0	0.00747857	0	0	0	0.00788193	0	26.4286	6.23196	0	3.21568	0.495062	0	1.97313	0.813274	0	0	0	0.025403	0.183632	0	0	0.0826872	0	0.0187489	0	0	0.283721	0.00988388	0	0	0	0.00885387	0	0	0	0	0.649115	0	0
10	Gunma	15	Basic inorganic chemical products	0.624705	0	0.00889933	0	9.24516	1.84506	1.09223	1.63223	0.00846984	0.159512	3.59769	0.537131	0.00781829	11.1529	115.168	0	23.6227	2.36174	0.0448494	39.4378	21.7023	0	0.0381942	7.84705	59.9973	22.838	0.174846	0.852101	0.795316	0.176867	0.08633	0.617169	0.0345085	2.26108	0.837397	1.73059	1.54551	0.377249	0.334297	0.805202	0.0611647	0.612372	0.478437	25.8659	0.108741	7.96011
10	Gunma	16	Basic organic chemical products	0	0	0	0	0	0	0	0	0	0	0	0	0	0	0	0	0	0	0	0	0	0	0	0	0	0	0	0	0	0	0	0	0	0	0	0	0	0	0	0	0	0	0	0	0	0
10	Gunma	17	Organic chemical products	0.00350967	0	0.000729963	0	0.870518	0.116975	0.0840672	0.00112982	0.0395999	0.0614942	0.567317	0.382232	0.0121845	0.0579263	4.01753	0	6.88712	8.58318	0.460457	6.21575	4.12302	0	0.00939859	3.86375	15.9067	0.297533	0.0043025	0.00342613	1.05348	0	0	0	0	0.0733614	0.182917	0.00272983	0.0237269	0.00336345	0.00334397	0.0220154	0.0169324	0.0356057	0.00919771	0.758011	0.0662588	0.223484
10	Gunma	18	Synthetic resins	0	0	0	0	0	0	0.00755027	0	0.0341929	1.70647	6.09254	1.67026	0.165703	0	0	0	0	0.0980593	0.822304	16.7599	0	0	0	273.376	0.149532	12.4506	0	0	1.34064	0	0	0	0	0	3.74804	0.00839715	0.316966	0	0	0.237024	0.092596	1.7133	0	7.62285	1.2229	13.441
10	Gunma	19	Synthetic fibers	0	0	0	0	3.80693	0	1.68658	4.52279	0.00601103	0.109432	0.152283	0.00343424	0	0	0	0	0	0	0	0	0	0	0.015812	0.138825	0.0129131	0.438057	0	0	0.982756	0	0	0	0	0	0	0	0	0	0	0	0	0	0	0	0	0
10	Gunma	20	Final chemical products	160.458	0	2.09649	0.203352	17.5595	1.05821	2.0587	4.78118	19.7059	24.442	30.3293	18.5371	21.9388	1.41841	3.22399	0	13.536	3.69275	0.389585	185.28	23.9412	0	5.33493	24.0918	13.6557	8.39069	4.6293	0.0522478	11.7298	0	0.0359955	4.99011	0.0719419	0.125702	3.79516	6.01891	17.9365	3.69301	5.54144	3.04256	5.06867	5.30052	2.29097	25.2948	1.16588	24.1207
10	Gunma	21	Medicaments	9.76808	0	0	0	0.996712	0	0	0.0587391	0	0	0	0	0	0	0	0	0	0	0	0.301149	66.3735	0	0	0	0	0	0	0	0	0	0	0	0	0	0	0	0	0	0	0	0	0	0	0	0	0
10	Gunma	22	Petroleum refinery products	0.120565	0	0.00496576	0.000520841	0.0767529	0.0172517	0.00521297	0.00255583	0.00909042	0.00236357	0.0130042	0.00548425	0.00371547	0.0166471	0.069753	0	0.00758818	0.00187567	0.00035922	0.0208408	0.0179731	2.63425e-05	0.0436184	0.019745	0.0131993	0.0650143	0.00961623	0.00343474	0.0268356	0.000157401	0.000599263	0.0115341	0.000737052	0.0281176	0.00801936	0.00393176	0.0217565	0.00556143	0.00894691	0.00633727	0.00142886	0.00384931	0.000479003	0.0108913	0.000891697	0.0051551
10	Gunma	23	Coal products	0	0	0.00157176	0	0	0	0	0	0.000747951	0	0.00505293	0	0	0.0570397	0.0728338	0	0.771	0	0	0.00431734	0	0	0	0.00398631	0	0	0	0	0.167362	0.00260312	0.0419297	0.444843	0.000761839	0.107378	0.00964545	0.0146947	0.00291936	0	0.00216007	0.00148136	0	0.00205356	0	0.000713351	0	0.000673957
10	Gunma	24	Plastic products	96.2004	0	0.0997924	0.447459	279.367	159.282	0.29361	28.3427	13.5816	83.1289	36.0517	164.74	78.2895	7.43617	43.7863	0	0.333978	0	0.419098	101.924	172.311	0	0	2194.54	149.569	47.1702	0.882283	0.702574	5.45531	0	0	0.327326	0	2.70449	43.2252	2.98553	14.7819	13.2886	21.0289	22.1025	26.2773	64.6697	14.2506	710.215	39.6295	740.014
10	Gunma	25	Rubber products	4.565	0	0.624	0.353554	1.30916	0.0996952	0.0102854	3.13415	0.197962	1.0417	0.757187	1.55679	0.33322	0.213132	0.200803	0	0.269088	0.11303	0	0.907421	1.75167	0	0.131279	1.4171	50.035	0.011625	0.276446	0	1.19814	0.0303959	0.261121	0.802652	0.0237221	0.0828977	0.175198	1.37268	1.30673	7.72358	20.1444	3.00975	2.83813	4.97693	1.72668	5.96399	1.8688	25.4975
10	Gunma	26	Glass and glass products	0.190465	0	0	0	3.15759	22.6446	0.0185005	0.349147	0.0418915	15.4731	0	0	0	0	2.23087	0	0.252529	0	0	3.06289	12.3795	0	0	9.67489	0.511029	25.3012	0.129717	0	0.816013	0	0	0	0	0	1.51938	0.195468	1.33872	0.294076	0.241964	0	0.425416	0.095847	0.545365	31.3536	0.595455	2.84992
10	Gunma	27	Cement and cement products	0.0138146	0	0	0.0572591	0	0	0	0	0	0	0	0	0	0	0	0	0	0	0	0.0131538	0	0	0.0308285	0	0	0	72.878	0	0.614623	0	0	0	0	0	0	0	0.253494	0	0	0	0	0	0	0.0260808	0	0
10	Gunma	28	Pottery, china and earthenware	0	0	0	0	0.00944083	0.00200846	0	0	0	0.0400117	0	0	0	0	0.00749585	0	0	0	0	0.00152341	0	0	0	0.00328208	0	0.000263471	0.00272411	0.0213454	0	0	0	0.000259879	0	0	0	0	0.00334789	0.000511093	0.00127033	0	0.000238237	0.0432354	0.000698819	0.0151027	0.000484056	0.0497027
10	Gunma	29	Other ceramic, stone and clay products	2.05659	0	0	0.0171307	0.0702372	0.006226	0	0	0.0229075	0.126343	0.505721	0.00280449	0.00302076	0.0332754	6.08459	0	0.0624694	0.103957	0	0.270751	0.392482	0	0.5165	0.23255	0.0662837	6.26596	3.6919	0.597127	7.77698	0.310361	0.0133422	3.20304	0	2.90041	0.625991	0.424336	1.421	3.68515	0.620611	0.994893	0.0236323	1.21895	0.222403	5.11239	0.0930321	2.37965
10	Gunma	30	Pig iron and crude steel	0	0	0	0	0	0	0	0	0	0	0	0	0	0	0.0412078	0	0	0	0	0	0	0	0	0	0	0	0	0	-0.00109679	1.09575	0.0235014	6.3485	0.0782847	0	0	-0.0248069	-0.280701	-0.0659137	-0.157488	-0.0163094	-0.00396446	-0.0321552	0	-0.197916	0	-0.124657
10	Gunma	31	steel products	0.0372572	0	0.0327842	0.178183	0	0	0	0.00691943	0.0737503	3.31741	0	0	0	0	0	0	0	0	0	0	0	0	0	0.894469	0.989768	0	3.38453	0	0.323022	0	16.9684	16.7754	27.6787	0.0639444	0.201188	19.0062	54.3138	12.3841	11.0591	13.2977	0.414802	8.01901	0.510729	9.3307	1.61538	10.2314
10	Gunma	32	Cast and forged steel products	0	0	0	0.0270144	0	0	0	0	0	0.826108	0	0	0	0	0	0	0	0	0	0	0	0	0	0	0	0	0.0798991	0.458098	0.412408	0	0	8.56243	0	0	0.610044	23.1925	29.1312	59.5624	68.5821	62.7052	2.79503	28.0779	2.80121	10.6805	0.567902	6.02184
10	Gunma	33	Other iron or steel products	0	0	0	0	0	0	0	0	0.0422941	39.2486	0	0	0	0	1.41574	0	0.0212463	0	0	0.101721	0	0	0	0.169059	0	0	3.27409	0.104288	1.77446	0	0	4.43533	0	0	0.818126	82.2417	268.791	30.0793	37.1524	7.47612	1.50804	19.1795	0.0373293	36.1425	10.5109	12.5001
10	Gunma	34	Non-ferrous metals	0	0	0	0	0	0	0	0	0.00592386	0.167345	0.0800396	0	-0.0874906	0	27.2142	0	0.184502	0	0	5.25445	0	0	0	0.242052	-0.00545392	2.76173	0	0.525851	2.65698	0.20617	0.283785	0.606645	-0.0181016	70.7631	351.179	0.13966	19.243	-0.143397	0.250918	0.293314	-0.00534737	2.01137	0.109798	130.573	0.059757	1.81486
10	Gunma	35	Non-ferrous metal products	0	0	0	0.178404	20.4735	1.38685	0	0	0.757352	11.1787	0	0.892429	1.74773	0	3.91793	0	0	0	0	3.62479	2.52097	0	0	6.23963	3.74783	1.56883	0	0.130723	2.57225	0	0	0.130507	0	2.15659	96.0594	51.1664	107.175	39.7093	23.2575	47.3619	2.47823	76.7461	13.6029	330.785	15.106	219.759
10	Gunma	36	Metal products for construction and architecture	0.124087	0	0	0.10715	0	0	0	0	0.0818761	1.61906	0	0	0	0	0	0	0	0	0	0	0	0	0	0	0	0	0.401422	0	0	0	0	0.0604665	0	0	0.0439942	14.9598	4.15446	0.971155	0	1.25674	0	0	0	0	0	0.331993
10	Gunma	37	Other metal products	14.1907	0	11.5015	7.58146	51.3602	262.117	0	8.18879	28.5281	101.649	4.38017	2.16483	0.715079	0	52.4771	0	23.0447	2.91263	0	32.3379	53.9516	0	1.1771	12.7751	116.905	9.91906	24.5439	4.38509	17.6639	0	0	23.4148	0.0343068	2.51761	8.506	70.5066	362.312	124.971	107.647	74.813	25.083	67.6916	25.0603	115.837	22.6405	417.698
10	Gunma	38	General industrial machinery	0.170024	0	0.959845	0.201349	0	0	0	0	0.0240401	0.633841	0	0	0	0	0	0	0	0	0	0	0	0	0.0271018	22.3578	0	37.2706	0.0248134	0.403088	2.1613	0	0	3.50343	0.195892	0.199661	0.43919	0.755687	3.94093	363.799	71.2787	13.3078	7.9641	8.33849	4.32848	3.55384	8.00264	5.56708
10	Gunma	39	Special industrial machinery	0	0	0	0	0	0	0	0	0	0	0	0	0	0	0	0	0	0	0	0	0	0	0	0	0	0.247441	0	0	0	0	0	0	0	0	0	0	0	2.01141	208.055	0.0116883	0.0319632	0.0216041	0.0312525	0.776735	0.0757675	0
10	Gunma	40	Other general machines	0	0	0.756882	0.104746	0	0	0	0	0.120059	10.0052	0	0	0	0	0	0	0	0	0	0.211752	0	0	0	1.35084	0	0.119854	0.0206535	0.907856	1.739	0	0	2.54173	0	0	0.645109	0.88453	2.59686	30.6123	34.7884	95.1137	1.75207	26.1325	3.99137	2.61454	2.80754	23.0247
10	Gunma	41	Machinery for office and service industry	0	0	0	0	0	0	0	0	0	0	0	0	0	0	0	0	0	0	0	0	0	0	0	0	0	0	0	0	0	0	0	0	0	0	0	0	0	0	0	0	562.102	0	0	0	0	0
10	Gunma	42	Industrial electric equipment	0.846654	0	0.0440231	0	0	0	0	0	0.0418985	0.315628	0	0	0	0	0	0	0	0	0	0	0	0	0	0.0372174	0	0	0	0	0	0	0	0	0	0	0.0450264	2.2637	0.286188	55.2956	83.0883	1.70114	13.313	298.824	27.0325	19.2609	17.5593	196.545
10	Gunma	43	Applied electric equipment and electric mesuring instruments	0	0	0	0	0	0	0	0	0	0	0	0	0	0	0	0	0	0	0	0	0	0	0	0	0	0	0	0	0	0	0	0	0	0	0	0	0	1.63553	8.38392	0.506418	0.853301	2.39683	26.124	0	0	0.865741
10	Gunma	44	Other electric equipment	2.08399	0	0.0516003	0	0.702694	0	0	0	0	1.89601	0	0	0	0	0.149445	0	0	0	0	0.708684	0.0499147	0	0	0.0872462	0	0	0	0	0	0	0	0	0	0	0.105552	0	3.01901	1.4741	6.90234	1.89667	3.32481	16.3151	10.8363	476.11	10.3583	176.874
10	Gunma	45	Household electric and electric applications	0	0	0	0	0	0	0	0	0	0	0	0	0	0	0	0	0	0	0	0	0	0	0	0.0269522	0	0	0	0	0	0	0	0	0	0	0	0	0	0	0	0	0	0	0	0	51.3932	0
10	Gunma	46	Communication equipment	0.0102806	0	0	0	0	0.0387171	0	0.00827374	0	0.00958142	0.00859257	0	0.00939246	0	0.0103212	0	0	0	0	0	0.330941	0	0	0.00903836	0.056208	0.0203157	0.0105025	0	0	0	0	0.0100193	0	0.0482905	0.0109348	0.0199908	0.0198576	0.315274	0.0979527	0.0100763	0	0	0.188596	0.077636	0.00933113	114.057
10	Gunma	47	Electric computing equipment and accessory equipment	0	0	0	0	0	0	0	0	0	0	0	0	0	0	0	0	0	0	0	0	0	0	0	0	0	0	0	0	0	0	0	0	0	0	0	0	0	0	0.891098	0	0	0	0	0	0	0.162576
10	Gunma	48	Semiconductor devices and integrated circuits	0	0	0	0	0	0	0	0	0	0	0	0	0	0	0	0	0	0	0	0	0	0	0	0	0	0	0	0	0	0	0	0	0	0	0	0	1.21546	0.567576	6.01909	2.10424	26.2802	34.0655	132.64	4.91508	30.7972	999.836
10	Gunma	49	Other electrical equipment	0	0	0	0	0.00887903	0.00275471	0	0	0	0	0	0.0049634	0.144347	0	0	0	0	0	0	0	0.0058866	0	0	0.00257231	0	0	0	0	0	0	0	0	0	0	0.0746888	0	0.536888	1.09074	1.49143	0.177798	4.86734	5.13621	27.2384	0.626949	5.04039	225.483
10	Gunma	50	Passenger motor cars	0	0	0	0	0	0	0	0	0	0	0	0	0	0	0	0	0	0	0	0	0	0	0	0	0	0	0	0	0	0	0	0	0	0	0	0	0	0	0	0	0	0	0	0	0	0
10	Gunma	51	Other cars	0	0	0	0	0	0	0	0	0	0	0	0	0	0	0	0	0	0	0	0	0	0	0	0	0	0	0	0	0	0	0	0	0	0	0	0	0	0	0	0	0	0	0	0	0	0
10	Gunma	52	Motor vheicle parts and accessories	0	0	0	0	0	0	0	0	0	0	0	0	0	0	0	0	0	0	0	0	0	0	0	0	0	0	0	0	0	0	0	0	0	0	0	0	0	0	2.51239	0	0	0	0	0	0	0
10	Gunma	53	Other transportation equipment	9.30845	0	0.00819658	0	0	0	0	0	0	0	0	0	0	0	0	0	0	0	0	0	0	0	0	0	0	0	0	0	0	0	0	0	0	0	0	0	0	0	0	0	0	0	0	0	0	0
10	Gunma	54	Precision instruments	0.235129	0	0	0.00676786	0.0528548	0	0	0.00525636	0.00646437	0.00608714	0.0709659	0.0110797	0	0	0.0327858	0	0	0	0	0.00621896	0.0394217	0	0	0.114843	0.0119031	0	0.00667231	0.0191277	0.00645747	0	0	0.00636536	0	0	0	0.0190504	0.0126157	1.43963	5.10286	0.0256062	0.291764	0.840093	0.353743	0.018496	0.0118563	14.8476
10	Gunma	55	Miscellaneous manufacturing products	2.42515	0	0.918201	0.170784	1.83393	2.47172	0	19.0341	1.52639	8.28378	0.177112	0.119825	0.0322665	0.0236956	0.0118191	0	0.128772	0	0	0.201771	0.0118428	0	0.0788149	0.403651	0.0536375	1.95417	0.0481066	0.976852	1.58296	0	0	2.78803	0	0.0138246	1.47756	0.297594	0.409309	4.02771	0.190685	0.0692315	0	0.170619	0.359942	0.277821	0.0427411	4.60912
10	Gunma	56	Reuse and recycling	0.397213	0	0	0	0.152034	9.97612	0	0	0	0	6.66675	0	0	2.94951	2.06935	0	0.469712	0	0	0	0	0	0	21.4248	0.146737	4.39141	1.04188	0.408719	0.605001	1.54391	0.0216601	12.1053	0.411262	17.536	29.4257	0	0.0207362	0	0	0	0	0	0	0.121606	0	0
10	Gunma	57	Building construction and repair of construction	0	0	0	0	0	0	0	0	0	0	0	0	0	0	0	0	0	0	0	0	0	0	0	0	0	0	0	0	0	0	0	0	0	0	0	0	0	0	0	0	0	0	0	0	0	0
10	Gunma	58	Public construction	0	0	0	0	0	0	0	0	0	0	0	0	0	0	0	0	0	0	0	0	0	0	0	0	0	0	0	0	0	0	0	0	0	0	0	0	0	0	0	0	0	0	0	0	0	0
10	Gunma	59	Other civil enginnering and construction	0	0	0	0	0	0	0	0	0	0	0	0	0	0	0	0	0	0	0	0	0	0	0	0	0	0	0	0	0	0	0	0	0	0	0	0	0	0	0	0	0	0	0	0	0	0
10	Gunma	60	Electricity	0.0455629	0	0.00701811	0.0113181	0.0896932	0.0198145	0.00301802	0.01182	0.019324	0.0101434	0.0922859	0.0100752	0.0105492	0.00999132	0.110833	0	0.0350472	0.00553625	0.0031348	0.0262233	0.0150297	0	0.00285099	0.0825667	0.050547	0.0466761	0.00902631	0.00222773	0.0337085	0.00440073	0.00249892	0.105557	0.00357869	0.0858689	0.045703	0.00883699	0.0808115	0.0202435	0.0186024	0.0202449	0.00618623	0.0115015	0.00335659	0.0611266	0.00341673	0.0331894
10	Gunma	61	Gas supply and heat supply	0	0	0	0	0	0	0	0	0	0	0	0	0	0	0	0	0	0	0	0	0	0	0	0	0	0	0	0	0	0	0	0	0	0	0	0	0	0	0	0	0	0	0	0	0	0
10	Gunma	62	Water supply and waste management services	0.00158918	0	0.000487922	0.000290137	0.0112146	0.00490903	0.000449855	0.000341054	0.000516804	0.000465487	0.00777336	0.000834436	0.000400997	0.00128708	0.00669332	0	0.00385283	0.00302039	0.000171862	0.00477009	0.00593024	0	6.75506e-05	0.00324671	0.00150327	0.00218333	0.00245841	0.000132973	0.00251393	6.51685e-05	0.000259562	0.00121691	0.000167838	0.00260377	0.00191567	0.000559174	0.00208293	0.00213216	0.0028841	0.000986476	0.000182547	0.000802001	0.000304091	0.00415748	0.000192321	0.00338797
10	Gunma	63	Commerce	50.3296	0	1.50264	0.462165	147.868	13.0628	1.09238	21.3826	17.2855	20.5573	34.9396	20.6819	9.08584	2.40383	16.1088	0	14.3317	4.43615	0.286554	20.6093	18.0211	0	2.73508	60.8336	34.0352	15.3731	7.90404	1.11548	8.31282	0.190458	1.28662	12.9937	5.96419	20.2318	17.4193	12.0021	30.804	22.1346	22.751	11.4815	6.59304	16.3471	12.6256	50.1083	6.10577	132.234
10	Gunma	64	Financial and insurance	1.75532	0	0.351226	0.130436	1.84339	0.335487	0.0887109	0.823532	0.35306	0.446164	0.401089	0.344618	0.196743	0.129411	0.562271	0	0.286932	0.159323	0.00845783	0.853751	0.430926	0	0.0138293	0.390229	0.52693	0.699558	0.475997	0.0510432	0.286053	0.00733791	0.0339934	0.254039	0.0659881	0.95514	0.822688	0.340419	0.567077	0.423516	0.436932	0.355702	0.0404865	0.157524	0.105902	0.891725	0.0597626	1.62175
10	Gunma	65	Real estate agencies and rental services	0	0	0	0	0	0	0	0	0	0	0	0	0	0	0	0	0	0	0	0	0	0	0	0	0	0	0	0	0	0	0	0	0	0	0	0	0	0	0	0	0	0	0	0	0	0
10	Gunma	66	House rent	0	0	0	0	0	0	0	0	0	0	0	0	0	0	0	0	0	0	0	0	0	0	0	0	0	0	0	0	0	0	0	0	0	0	0	0	0	0	0	0	0	0	0	0	0	0
10	Gunma	67	Transport	36.7965	0	8.15404	0.740415	30.0755	4.49441	0.253461	2.61006	6.59856	3.66343	5.85562	3.95223	2.20305	0.731862	4.48233	0	2.41833	1.02809	0.0885694	4.04146	4.79413	0.00182672	0.896281	7.94929	3.9312	4.17343	9.61575	0.278395	4.02728	0.0764052	0.361217	3.84168	1.09409	16.1623	4.68812	3.89718	8.26269	3.87784	3.48706	2.52961	0.748798	2.33923	1.23732	9.47288	0.592464	14.0096
10	Gunma	68	Communication	0.174185	0	0.0373783	0.0952601	0.284575	0.102172	0.0120851	0.17189	0.0472045	0.130129	0.101678	0.100841	0.091567	0.0166951	0.176955	0	0.0453641	0.022336	0.00241504	0.127023	1.97683	0	0.0154251	0.294121	0.412553	0.140689	0.0734375	0.00877189	0.0765401	0	0.00976223	0.113846	0.00557461	0.354711	0.186004	0.291663	0.301068	0.378901	0.23643	0.189693	0.0407581	0.144004	0.120159	0.461953	0.0407793	0.932063
10	Gunma	69	Broadcasting	0	0	0	0	0	0	0	0	0	0	0	0	0	0	0	0	0	0	0	0	0	0	0	0	0	0	0	0	0	0	0	0	0	0	0	0	0	0	0	0	0	0	0	0	0	0
10	Gunma	70	Information services	0.349954	0	0.0109397	0.0167142	0.770426	0.329483	0.00551776	0.0807102	0.0812118	0.247719	0.168227	0.119565	0.0845754	0.0656386	0.134479	0	0.164581	0.083912	0.00367549	0.196323	1.21344	0	0.0117378	0.541345	0.372568	0.247378	0.128244	0.028754	0.193452	0.00543547	0.0219322	0.159936	0.0445414	0.337657	0.317023	0.158871	0.683406	0.411992	0.694261	0.239893	0.0708023	0.503755	0.621826	1.6014	0.0324635	2.8139
10	Gunma	71	﻿Internet based services	0.000770968	0	0.000267251	0.000399442	0.00740885	0.00375033	0.00022466	0.00392962	0.00152612	0.00359266	0.00139615	0.00152584	0.00270006	0.000258631	0.00322505	0	0.00102219	0.000336666	0	0.00232463	0.0376149	0	0.000143374	0.0102801	0.00550313	0.003174	0.00157521	0.000125436	0.00127041	0	0.000129627	0.00313072	0.000129538	0.00814818	0.0042368	0.00562182	0.00781813	0.00640335	0.00538685	0.00251882	0.000574002	0.00419009	0.00347968	0.0143127	0.000933017	0.0315137
10	Gunma	72	Image information production and distribution industry	0.0274063	0	0.0128253	0.0118328	0.100727	0.00946115	0.0095834	0.102194	0.0135626	0.0544903	0.0393223	0.0507535	0.0150231	0.0795263	0.0664934	0	0.0140805	0.00757958	0.000797962	0.0487115	0.215043	0	0.00458698	0.0991894	0.157748	0.103803	0.0569287	0.0107016	0.0600634	0.000393353	0.00184318	0.0258194	0.00368385	0.0434476	0.0233201	0.0399688	0.191454	0.0647857	0.0722443	0.0308908	0.0175479	0.0542008	0.0494781	0.283281	0.014925	0.560938
10	Gunma	73	Public administration	0	0	0	0	0	0	0	0	0	0	0	0	0	0	0	0	0	0	0	0	0	0	0	0	0	0	0	0	0	0	0	0	0	0	0	0	0	0	0	0	0	0	0	0	0	0
10	Gunma	74	Education and Research	0.574368	0	0.0659812	0.480977	13.853	2.78245	0.093416	1.01586	0.16195	1.89846	1.1834	1.17545	0.0915256	2.4365	13.0749	0	5.34619	2.66855	0.233348	16.3814	72.0258	0	0.167672	18.5956	16.1304	16.9164	3.2272	0.779108	5.15706	0.0862714	0.387408	1.83878	0.00673294	4.15278	6.79466	2.74346	3.55725	6.79727	10.0001	2.36963	2.76865	14.4344	14.1655	64.8409	4.67066	92.8968
10	Gunma	75	Medical service, health and social security and nursing care	0.00562011	0	0.00303916	0.0033777	0.0477546	0.0157683	0.000491309	0.0116693	0.00311499	0.00398078	0.00986433	0.00505297	0.00287536	0.00203617	0.0118488	0	0.00525327	0.00206152	0.000392725	0.0118799	0.0466989	0	0.000877927	0.0176888	0.0225333	0.00766313	0.0065452	0.000658362	0.00355618	9.67963e-05	0.000566962	0.00920182	0.00181304	0.00633575	0.00370619	0.00830554	0.0231223	0.0228365	0.0133869	0.0211523	0.00351481	0.0076361	0.00333846	0.0210084	0.00142829	0.0476158
10	Gunma	76	Advertising and survery	0.0613181	0	0.0425111	0.0225459	7.43655	2.40857	0.010375	0.236659	0.0750458	0.466399	0.767645	1.08829	0.0433708	0.0696724	0.386572	0	0.0563847	0.0506736	0.00691099	1.89218	4.21306	0	0.00220705	0.878769	0.918028	0.13811	0.0996875	0.0366876	0.127116	0.00227117	0.0166286	0.120805	0.0146232	0.106074	0.124829	0.171799	0.341309	0.369641	0.370642	0.229412	0.126649	0.281892	0.275313	1.30888	0.144822	3.15235
10	Gunma	77	Giids rental and leasing services	1.69779	0	0.229493	0.255377	3.04213	0.485306	0.0901224	0.492616	0.41292	0.747623	0.554681	0.415349	0.384099	0.0421485	0.829607	0	0.137752	0.181479	0.0112561	0.40798	0.452094	0	0.309141	2.62415	1.50744	1.28121	1.69823	0.103783	1.18648	0.0194203	0.0601249	0.838309	0.128287	0.366967	0.885777	0.538742	3.67451	2.70764	2.68583	1.46985	0.338197	2.69638	0.849909	4.66804	0.282173	13.0368
10	Gunma	78	Other business services	0	0	0	0	0	0	0	0	0	0	0	0	0	0	0	0	0	0	0	0	0	0	0	0	0	0	0	0	0	0	0	0	0	0	0	0	0	0	0	0	0	0	0	0	0	0
10	Gunma	79	Personal services	0.0770247	0	0.00200251	0	0.0603841	0.0154103	0	0.0123977	0.00952935	0.00807593	0.0120708	0.00653321	0.00527778	0.00193792	0.0183656	0	0.00478704	0.00420439	0	0.00916758	0.0184024	0	0	0.0279334	0.0193014	0.0104644	0.00885229	0.000939893	0.00190384	0	0	0.00656837	0.00194126	0.0248739	0.0204815	0.00655266	0.0251062	0.0147631	0.0137603	0.00849305	0.00430099	0.0156981	0.00756964	0.0527135	0.00174777	0.0772796
10	Gunma	80	Activities not elsewhere classified	0	0	0	0	0	0	0	0	0	0	0	0	0	0	0	0	0	0	0	0	0	0	0	0	0	0	0	0	0	0	0	0	0	0	0	0	0	0	0	0	0	0	0	0	0	0
11	Saitama	1	Agriculture, forestry and fishery	72.1876	0	0.00171766	0.0325187	203.329	5.29506	0.0158831	0.0358903	22.7608	0.00153937	0	0.00280193	0	0.0199471	0.150898	0	0.259505	0	0	0.212315	0.526711	0	0.0239585	0	14.089	0	0	0	0.0293943	0	0	0	0	0	0.0052704	0	0	0	0	0	0	0	0	0	0	0
11	Saitama	2	Metallic ores	0	0	0	0	0	0	0	0	0	0	0	0	0	0	0	0	0	0	0	0	0	0	0	0	0	0	0	0	0	0	0	0	0	0	0	0	0	0	0	0	0	0	0	0	0	0
11	Saitama	3	Non-metallic ores	0.0273226	0	0.0662984	0	0	0	0	0	0	0	0.502397	0.00257499	0	0.595771	3.94084	0	0.3049	0	0	0.213907	0.0397012	0	1.31769	0	0.193644	14.509	9.40332	0.699406	6.78339	-0.00261434	0	0.0976366	0	0.0570401	0.00968704	0.00590321	0.0117278	0	0	0.0446325	0	0	0	0	0	0
11	Saitama	4	Coal mining, crude petroleum and natural gas	0	0	0	0	0	0	0	0	0	0	0	0	0	0	0	0	0	0	0	0	0	0	0	0	0	0	0	0	0	0	0	0	0	0	0	0	0	0	0	0	0	0	0	0	0	0
11	Saitama	5	Food and Tobacco	526.003	0	0	0	1453.43	119.629	0	5.86214	0.109565	0	7.03177	0.0187791	0	0.15597	0.777961	0	4.53526	0.0386724	0	6.19783	25.546	0	0	0.3309	0	0.678144	0	0.0864523	1.75117	0	0	0.0215773	0	0	0	0	0	0	0	0	0	0	0	0	0	0
11	Saitama	6	Beverage	2.48482	0	0	0	4.0189	6.17003	0	0	0	0	0	0	0	0	0	0	0.0271525	0	0	0	0.123608	0	0	0	0	0	0	0	0	0	0	0	0	0	0	0	0	0	0	0	0	0	0	0	0	0
11	Saitama	7	Textile products	8.2252	0	0	0	0.963401	0.0203791	14.9864	383.621	0.364196	9.96553	6.25954	28.7692	0.395506	0.631724	0	0	0	0	0.170161	0.04122	0	0	0	2.6261	41.4988	0.72715	0.0221124	0	1.45523	0	0	0.0421903	0	0	1.26624	0.105223	1.29608	0.186691	0.391844	0.0212151	0	0	0	17.5105	3.24162	8.53233
11	Saitama	8	Wearing aparel and other textile products	6.288	0	0.476313	0.142382	3.60725	0.381947	0.0972407	5.39753	0.712369	0.847645	0.809383	0.627139	0.0836906	0.368759	0.289037	0	0.24074	0.0400019	0	0.473497	0.829356	0	0.511061	0.385419	0.798952	1.83607	0.387695	0.153299	0.85393	0	0.0132017	0.599428	0.0659633	0.138307	0.723792	0.286274	1.346	0.708575	0.455102	0.801642	0.0993794	0.883102	0.445837	0.98824	0.302882	3.65297
11	Saitama	9	Timber and wooden products	6.00798	0	0.102257	0.0713236	3.3023	0.638791	0	0.229492	76.5826	68.0721	0.0164369	1.85989	0.0179671	0.00989585	0	0	0.00977787	0.0171755	0	0.215342	0	0	0	0.708877	0.0268804	2.52605	0.140633	1.40145	1.6041	0	0	1.60996	0	0	3.38862	0.47801	2.34564	0.188467	0.252958	0.0963759	0.237197	0.249391	0.0858974	1.01174	0.0803238	2.16604
11	Saitama	10	Furniture and fixtures	0.497399	0	0.793135	0.824657	13.9875	0.686846	0.0869652	2.80211	0.459479	77.8489	1.41347	1.54694	0.484723	0.233603	2.36366	0	0.758401	0.376488	0	2.68378	5.4373	0	0.0369998	7.25911	2.50795	0.360403	0.813015	0.87401	1.57367	0	0.133808	2.8116	0	0.15576	1.48134	0.354639	1.85746	1.36647	1.1374	0.910025	0.237008	1.2315	1.5063	8.85838	1.02331	103.861
11	Saitama	11	Pulp, paper, paperboard, building paper	1.51339	0	0	0	34.506	0.227978	0.07938	1.14488	6.68048	18.5898	732.802	452.05	133.259	0	12.3676	0	0	5.92135	0	25.5057	5.35888	0	0	22.4591	8.16392	30.7735	0	2.48198	15.1123	0	0	0	0.152568	0	3.28376	0.117712	1.14004	0.667154	0.0288388	2.61062	0	18.4515	0.370169	24.8858	1.34614	26.1029
11	Saitama	12	Paper products	231.315	0	0	0	365.9	123.046	0.750984	14.9794	0.850245	33.5197	3.82933	55.4743	2.61613	5.82126	15.5241	0	3.47389	0.950335	0.450221	67.1823	124.211	0	0.0639021	32.224	3.39211	99.8183	0.526557	16.269	11.7209	0	0	0	1.38565	0	4.56859	0.0556813	27.3233	5.65308	0.982198	5.27641	2.14901	7.15887	3.55206	41.735	8.00507	77.5325
11	Saitama	13	Publishing, printing	2.42524	0	0.657935	0.983371	482.335	25.7128	1.75142	42.2609	3.7571	36.4595	3.52525	119.847	224.269	2.12238	15.2441	0	1.57281	2.11811	0.644731	104.317	37.4441	0	0.352967	8.71414	9.80063	57.3022	2.26214	1.33816	6.25515	0.0908053	0.425497	16.5452	0.106302	4.33388	8.74808	2.97307	34.1153	14.4505	21.6004	11.4718	23.175	7.54553	11.1456	34.1409	21.2468	444.43
11	Saitama	14	Chemical fertilizer	61.3625	0	0	0	0.015594	0.0507991	0	0.00620322	0	0	0	0.0065378	0	21.9217	5.1692	0	2.6673	0.410637	0	1.63665	0.674584	0	0	0	0.0210709	0.152317	0	0	0.0685863	0	0.0155516	0	0	0.235337	0.00819835	0	0	0	0.00734399	0	0	0	0	0.538419	0	0
11	Saitama	15	Basic inorganic chemical products	0.201361	0	0.00286851	0	2.97998	0.594716	0.352058	0.526117	0.00273008	0.0514152	1.15964	0.173133	0.00252006	3.59491	37.1219	0	7.61427	0.761258	0.0144563	12.7119	6.99529	0	0.0123111	2.52933	19.3389	7.36136	0.0563579	0.274657	0.256353	0.0570095	0.0278267	0.198931	0.0111231	0.728813	0.269917	0.557821	0.498162	0.121598	0.107754	0.25954	0.0197152	0.197385	0.154214	8.33732	0.0350505	2.56577
11	Saitama	16	Basic organic chemical products	0	0	0	0	0	0	0	0	0	0	0	0	0	0	0	0	0	0	0	0	0	0	0	0	0	0	0	0	0	0	0	0	0	0	0	0	0	0	0	0	0	0	0	0	0	0
11	Saitama	17	Organic chemical products	0.0203347	0	0.00422935	0	5.04371	0.677742	0.487079	0.00654607	0.229439	0.356293	3.28699	2.21462	0.0705963	0.335621	23.2773	0	39.9035	49.7303	2.66785	36.0136	23.8885	0	0.0544547	22.3863	92.1625	1.72388	0.0249283	0.0198508	6.1038	0	0	0	0	0.425051	1.05981	0.0158164	0.137472	0.0194876	0.0193747	0.127556	0.098105	0.206297	0.0532909	4.39186	0.383899	1.29485
11	Saitama	18	Synthetic resins	0	0	0	0	0	0	0.00135574	0	0.00613975	0.306418	1.09399	0.299915	0.0297541	0	0	0	0	0.0176078	0.147655	3.00944	0	0	0	49.0881	0.0268502	2.23566	0	0	0.240728	0	0	0	0	0	0.673006	0.00150781	0.0569152	0	0	0.0425605	0.0166267	0.307643	0	1.36878	0.219587	2.41349
11	Saitama	19	Synthetic fibers	0	0	0	0	0	0	0	0	0	0	0	0	0	0	0	0	0	0	0	0	0	0	0	0	0	0	0	0	0	0	0	0	0	0	0	0	0	0	0	0	0	0	0	0	0	0
11	Saitama	20	Final chemical products	674.28	0	8.80989	0.854531	73.7889	4.44683	8.65109	20.0915	82.8084	102.71	127.45	77.8968	92.1917	5.96047	13.5479	0	56.8812	15.5177	1.63712	778.587	100.606	0	22.4185	101.239	57.3843	35.2595	19.4533	0.219557	49.2911	0	0.151261	20.9695	0.302315	0.528226	15.9481	25.2928	75.3729	15.5188	23.2864	12.7855	21.2997	22.2739	9.62714	106.294	4.8993	101.36
11	Saitama	21	Medicaments	35.8201	0	0	0	3.655	0	0	0.215399	0	0	0	0	0	0	0	0	0	0	0	1.10433	243.395	0	0	0	0	0	0	0	0	0	0	0	0	0	0	0	0	0	0	0	0	0	0	0	0	0
11	Saitama	22	Petroleum refinery products	2.77895	0	0.114458	0.0120051	1.76911	0.397641	0.120156	0.0589103	0.209529	0.0544788	0.29974	0.126409	0.0856395	0.383706	1.60777	0	0.174903	0.043233	0.00827981	0.480368	0.414269	0.000607178	1.00538	0.455111	0.304236	1.49854	0.221648	0.0791687	0.618543	0.00362801	0.0138127	0.265854	0.0169886	0.648093	0.184841	0.0906248	0.501474	0.128188	0.206221	0.14607	0.0329345	0.0887244	0.0110407	0.251038	0.0205531	0.118822
11	Saitama	23	Coal products	0	0	0.0270375	0	0	0	0	0	0.0128663	0	0.0869211	0	0	0.981204	1.2529	0	13.2628	0	0	0.0742673	0	0	0	0.068573	0	0	0	0	2.87899	0.0447792	0.72128	7.65224	0.0131052	1.84714	0.165922	0.252779	0.0502191	0	0.0371578	0.0254826	0	0.0353255	0	0.0122712	0	0.0115935
11	Saitama	24	Plastic products	127.714	0	0.132482	0.594037	370.882	211.46	0.389791	37.6272	18.0307	110.36	47.8615	218.706	103.936	9.87212	58.1299	0	0.443382	0	0.556387	135.312	228.756	0	0	2913.43	198.565	62.6222	1.1713	0.932724	7.24237	0	0	0.434551	0	3.59043	57.3849	3.96354	19.6242	17.6417	27.9176	29.3429	34.8853	85.8543	18.9189	942.868	52.6113	982.429
11	Saitama	25	Rubber products	5.22922	0	0.714793	0.404996	1.49965	0.114201	0.0117819	3.59017	0.226766	1.19327	0.86736	1.78331	0.381704	0.244143	0.23002	0	0.308241	0.129477	0	1.03945	2.00654	0	0.15038	1.62329	57.3152	0.0133164	0.316669	0	1.37247	0.0348185	0.299114	0.919439	0.0271737	0.0949594	0.200689	1.57241	1.49686	8.84737	23.0754	3.44768	3.25108	5.70109	1.97791	6.83176	2.14071	29.2075
11	Saitama	26	Glass and glass products	0.251265	0	0	0	4.16555	29.8731	0.0244061	0.460601	0.0552639	20.4123	0	0	0	0	2.943	0	0.33314	0	0	4.04061	16.3313	0	0	12.7633	0.674158	33.3777	0.171125	0	1.0765	0	0	0	0	0	2.0044	0.257865	1.76607	0.38795	0.319203	0	0.561216	0.126443	0.719455	41.3622	0.785534	3.75965
11	Saitama	27	Cement and cement products	0.0324692	0	0	0.13458	0	0	0	0	0	0	0	0	0	0	0	0	0	0	0	0.0309162	0	0	0.0724581	0	0	0	171.289	0	1.44459	0	0	0	0	0	0	0	0.595802	0	0	0	0	0	0	0.0612992	0	0
11	Saitama	28	Pottery, china and earthenware	0	0	0	0	0.00575432	0.00122419	0	0	0	0.0243877	0	0	0	0	0.00456883	0	0	0	0	0.000928541	0	0	0	0.00200047	0	0.000160589	0.00166038	0.0130103	0	0	0	0.0001584	0	0	0	0	0.00204059	0.000311518	0.000774287	0	0.000145209	0.0263526	0.000425941	0.00920534	0.000295039	0.0302945
11	Saitama	29	Other ceramic, stone and clay products	8.94244	0	0	0.0744875	0.305405	0.0270719	0	0	0.0996063	0.549364	2.19897	0.0121944	0.0131349	0.144688	26.457	0	0.271629	0.452024	0	1.17728	1.70659	0	2.24584	1.01117	0.288214	27.2456	16.0531	2.59643	33.8158	1.34951	0.0580143	13.9275	0	12.6115	2.72193	1.8451	6.17878	16.0237	2.69854	4.32599	0.102758	5.30024	0.96705	22.2297	0.404522	10.3472
11	Saitama	30	Pig iron and crude steel	0	0	0	0	0	0	0	0	0	0	0	0	0	0	0	0	0	0	0	0	0	0	0	0	0	0	0	0	0	0	0	0	0	0	0	0	0	0	0	0	0	0	0	0	0	0
11	Saitama	31	steel products	0.150482	0	0.132415	0.719681	0	0	0	0.0279476	0.297877	13.399	0	0	0	0	0	0	0	0	0	0	0	0	0	3.61276	3.99767	0	13.6701	0	1.30468	0	68.5353	67.7557	111.794	0.258271	0.812598	76.7659	219.373	50.0195	44.6676	53.7094	1.67538	32.3888	2.06283	37.6866	6.5245	41.3246
11	Saitama	32	Cast and forged steel products	0	0	0	0.0447403	0	0	0	0	0	1.36817	0	0	0	0	0	0	0	0	0	0	0	0	0	0	0	0	0.132326	0.758686	0.683016	0	0	14.1808	0	0	1.01033	38.4107	48.2461	98.6452	113.583	103.85	4.62904	46.5017	4.63926	17.6886	0.940539	9.97317
11	Saitama	33	Other iron or steel products	0	0	0	0	0	0	0	0	0.0577779	53.6174	0	0	0	0	1.93404	0	0.0290245	0	0	0.138961	0	0	0	0.230952	0	0	4.47273	0.142468	2.42408	0	0	6.0591	0	0	1.11764	112.35	367.195	41.0912	50.7538	10.2131	2.06013	26.201	0.0509954	49.3742	14.3589	17.0763
11	Saitama	34	Non-ferrous metals	0	0	0	0	0	0	0	0	0.0037059	0.104689	0.0500719	0	-0.0547331	0	17.0249	0	0.115422	0	0	3.28712	0	0	0	0.151425	-0.00341191	1.7277	0	0.328966	1.66217	0.128978	0.177532	0.37951	-0.0113241	44.2686	219.694	0.0873698	12.0382	-0.0897076	0.156971	0.183494	-0.00334525	1.25829	0.0686883	81.6851	0.0373833	1.13536
11	Saitama	35	Non-ferrous metal products	0	0	0	0.524451	60.1855	4.07688	0	0	2.22637	32.8619	0	2.62346	5.13777	0	11.5175	0	0	0	0	10.6557	7.41084	0	0	18.3425	11.0174	4.61185	0	0.384283	7.56159	0	0	0.383648	0	6.33969	282.384	150.413	315.061	116.733	68.3695	139.229	7.2852	225.609	39.9882	972.403	44.4067	646.021
11	Saitama	36	Metal products for construction and architecture	0.205792	0	0	0.177703	0	0	0	0	0.135787	2.68513	0	0	0	0	0	0	0	0	0	0	0	0	0	0	0	0	0.665738	0	0	0	0	0.100281	0	0	0.0729622	24.8101	6.88997	1.61061	0	2.08425	0	0	0	0	0	0.550594
11	Saitama	37	Other metal products	21.1197	0	17.1175	11.2834	76.4384	390.104	0	12.1872	42.4579	151.283	6.51892	3.22188	1.06424	0	78.1007	0	34.297	4.33482	0	48.1279	80.2952	0	1.75186	19.0129	173.988	14.7624	36.5283	6.52626	26.2888	0	0	34.8479	0.0510582	3.74692	12.6593	104.934	539.223	185.993	160.209	111.343	37.3305	100.744	37.2968	172.398	33.6954	621.652
11	Saitama	38	General industrial machinery	0.258769	0	1.46084	0.306445	0	0	0	0	0.0365879	0.964679	0	0	0	0	0	0	0	0	0	0	0	0	0.0412477	34.0276	0	56.7241	0.0377648	0.613482	3.2894	0	0	5.33207	0.298138	0.303874	0.668428	1.15012	5.99792	553.687	108.483	20.2538	12.121	12.6908	6.58775	5.40878	12.1797	8.47286
11	Saitama	39	Special industrial machinery	0	0	0	0	0	0	0	0	0	0	0	0	0	0	0	0	0	0	0	0	0	0	0	0	0	0.521945	0	0	0	0	0	0	0	0	0	0	0	4.24282	438.866	0.024655	0.0674222	0.045571	0.065923	1.63842	0.159822	0
11	Saitama	40	Other general machines	0	0	0.826023	0.114315	0	0	0	0	0.131026	10.9192	0	0	0	0	0	0	0	0	0	0.231096	0	0	0	1.47424	0	0.130803	0.0225402	0.990788	1.89786	0	0	2.77392	0	0	0.704039	0.965332	2.83409	33.4087	37.9664	103.802	1.91212	28.5196	4.35598	2.85337	3.06401	25.128
11	Saitama	41	Machinery for office and service industry	0	0	0	0	0	0	0	0	0	0	0	0	0	0	0	0	0	0	0	0	0	0	0	0	0	0	0	0	0	0	0	0	0	0	0	0	0	0	0	0	214.345	0	0	0	0	0
11	Saitama	42	Industrial electric equipment	0.473022	0	0.0245955	0	0	0	0	0	0.0234085	0.17634	0	0	0	0	0	0	0	0	0	0	0	0	0	0.0207932	0	0	0	0	0	0	0	0	0	0	0.025156	1.26472	0.159892	30.8934	46.4211	0.950422	7.43793	166.952	15.1029	10.761	9.81029	109.809
11	Saitama	43	Applied electric equipment and electric mesuring instruments	0	0	0	0	0	0	0	0	0	0	0	0	0	0	0	0	0	0	0	0	0	0	0	0	0	0	0	0	0	0	0	0	0	0	0	0	0	1.41974	7.27773	0.4396	0.740715	2.08058	22.6772	0	0	0.751514
11	Saitama	44	Other electric equipment	0.62543	0	0.0154858	0	0.210886	0	0	0	0	0.569015	0	0	0	0	0.04485	0	0	0	0	0.212684	0.01498	0	0	0.0261836	0	0	0	0	0	0	0	0	0	0	0.0316775	0	0.90604	0.442395	2.07147	0.569214	0.997813	4.89634	3.25209	142.886	3.10865	53.0818
11	Saitama	45	Household electric and electric applications	0	0	0	0	0	0	0	0	0	0	0	0	0	0	0	0	0	0	0	0	0	0	0	0.0216445	0	0	0	0	0	0	0	0	0	0	0	0	0	0	0	0	0	0	0	0	41.2724	0
11	Saitama	46	Communication equipment	0.0544762	0	0	0	0	0.205158	0	0.0438418	0	0.0507711	0.0455313	0	0.0497698	0	0.0546913	0	0	0	0	0	1.75363	0	0	0.0478935	0.297841	0.107651	0.0556519	0	0	0	0	0.0530917	0	0.255887	0.0579426	0.105929	0.105224	1.67061	0.519043	0.0533934	0	0	0.999352	0.411387	0.0494449	604.379
11	Saitama	47	Electric computing equipment and accessory equipment	0	0	0	0	0	0	0	0	0	0	0	0	0	0	0	0	0	0	0	0	0	0	0	0	0	0	0	0	0	0	0	0	0	0	0	0	0	0	0.326558	0	0	0	0	0	0	0.0595788
11	Saitama	48	Semiconductor devices and integrated circuits	0	0	0	0	0	0	0	0	0	0	0	0	0	0	0	0	0	0	0	0	0	0	0	0	0	0	0	0	0	0	0	0	0	0	0	0	0.51794	0.241859	2.56489	0.89667	11.1987	14.5162	56.5213	2.09444	13.1235	426.056
11	Saitama	49	Other electrical equipment	0	0	0	0	0.0446999	0.0138681	0	0	0	0	0	0.0249874	0.726688	0	0	0	0	0	0	0	0.0296351	0	0	0.0129498	0	0	0	0	0	0	0	0	0	0	0.376008	0	2.70287	5.49114	7.50836	0.895091	24.5037	25.8573	137.127	3.15627	25.3749	1135.16
11	Saitama	50	Passenger motor cars	0	0	0	0	0	0	0	0	0	0	0	0	0	0	0	0	0	0	0	0	0	0	0	0	0	0	0	0	0	0	0	0	0	0	0	0	0	0	0	0	0	0	0	0	0	0
11	Saitama	51	Other cars	0	0	0	0	0	0	0	0	0	0	0	0	0	0	0	0	0	0	0	0	0	0	0	0	0	0	0	0	0	0	0	0	0	0	0	0	0	0	0	0	0	0	0	0	0	0
11	Saitama	52	Motor vheicle parts and accessories	0	0	0	0	0	0	0	0	0	0	0	0	0	0	0	0	0	0	0	0	0	0	0	0	0	0	0	0	0	0	0	0	0	0	0	0	0	0	3.90926	0	0	0	0	0	0	0
11	Saitama	53	Other transportation equipment	4.54686	0	0.00400375	0	0	0	0	0	0	0	0	0	0	0	0	0	0	0	0	0	0	0	0	0	0	0	0	0	0	0	0	0	0	0	0	0	0	0	0	0	0	0	0	0	0	0
11	Saitama	54	Precision instruments	0.8064	0	0	0.0232111	0.181271	0	0	0.0180273	0.0221703	0.0208765	0.243386	0.0379992	0	0	0.112442	0	0	0	0	0.0213286	0.135201	0	0	0.393865	0.040823	0	0.0228834	0.0656006	0.0221466	0	0	0.0218307	0	0	0	0.0653355	0.0432668	4.93736	17.5008	0.0878192	1.00064	2.88119	1.2132	0.0634341	0.0406624	50.9214
11	Saitama	55	Miscellaneous manufacturing products	4.99632	0	1.89169	0.351851	3.77829	5.09226	0	39.2143	3.14469	17.0663	0.364887	0.246866	0.0664759	0.0488179	0.0243498	0	0.265297	0	0	0.415691	0.0243986	0	0.162375	0.831605	0.110505	4.026	0.0991097	2.01252	3.26123	0	0	5.74393	0	0.0284816	3.04408	0.613107	0.843262	8.29793	0.392852	0.142632	0	0.351511	0.741556	0.57237	0.0880557	9.49576
11	Saitama	56	Reuse and recycling	0.569047	0	0	0	0.217804	14.2918	0	0	0	0	9.55078	0	0	4.22547	2.96456	0	0.672909	0	0	0	0	0	0	30.6932	0.210216	6.29113	1.4926	0.585531	0.866724	2.21181	0.0310303	17.342	0.589174	25.1221	42.1553	0	0.0297067	0	0	0	0	0	0	0.174213	0	0
11	Saitama	57	Building construction and repair of construction	0	0	0	0	0	0	0	0	0	0	0	0	0	0	0	0	0	0	0	0	0	0	0	0	0	0	0	0	0	0	0	0	0	0	0	0	0	0	0	0	0	0	0	0	0	0
11	Saitama	58	Public construction	0	0	0	0	0	0	0	0	0	0	0	0	0	0	0	0	0	0	0	0	0	0	0	0	0	0	0	0	0	0	0	0	0	0	0	0	0	0	0	0	0	0	0	0	0	0
11	Saitama	59	Other civil enginnering and construction	0	0	0	0	0	0	0	0	0	0	0	0	0	0	0	0	0	0	0	0	0	0	0	0	0	0	0	0	0	0	0	0	0	0	0	0	0	0	0	0	0	0	0	0	0	0
11	Saitama	60	Electricity	0.268391	0	0.0413406	0.0666701	0.528343	0.116718	0.0177778	0.0696261	0.113829	0.0597502	0.543616	0.0593484	0.0621408	0.0588544	0.652865	0	0.206448	0.0326116	0.0184657	0.15447	0.0885331	0	0.0167939	0.486364	0.29775	0.274949	0.05317	0.0131226	0.198562	0.0259227	0.01472	0.621789	0.0210805	0.505816	0.269216	0.0520548	0.476025	0.119246	0.109579	0.119254	0.0364403	0.0677504	0.0197722	0.36007	0.0201264	0.195504
11	Saitama	61	Gas supply and heat supply	0.00545268	0	0.00189014	0.00376675	1.29068	0.706743	0.0397227	0.0219413	0.00899461	0.032185	0.132164	0.0770824	0.00166054	0.24328	0.293783	0	0.124708	0.0666702	0.00476282	0.211137	0.319969	0	0.00811212	0.404277	0.251744	2.28253	0.0222815	0.101135	0.134775	0.00939127	0.0568408	0.774088	0.00366465	0.0490906	0.663093	0.109562	0.561715	0.0836082	0.0952464	0.0552245	0.0162386	0.116892	0.031755	1.28335	0.00329939	0.414965
11	Saitama	62	Water supply and waste management services	0.188607	0	0.0579076	0.0344341	1.33097	0.582614	0.0533898	0.0404771	0.0613354	0.055245	0.922559	0.0990327	0.0475912	0.152754	0.794378	0	0.457263	0.358466	0.020397	0.566124	0.703814	0	0.00801705	0.385326	0.178411	0.259122	0.291769	0.0157816	0.298358	0.00773434	0.0308054	0.144425	0.0199193	0.309021	0.227356	0.066364	0.247207	0.253049	0.342291	0.117077	0.0216651	0.0951833	0.0360902	0.493419	0.022825	0.402092
11	Saitama	63	Commerce	210.283	0	6.27822	1.93098	617.812	54.578	4.5641	89.3392	72.221	85.8909	145.982	86.4115	37.9618	10.0435	67.3048	0	59.8796	18.5348	1.19726	86.1085	75.2944	0	11.4275	254.171	142.203	64.2307	33.0241	4.66064	34.732	0.795757	5.37565	54.2892	24.9192	84.5309	72.7801	50.1464	128.703	92.4813	95.0567	47.9712	27.5466	68.3002	52.7515	209.359	25.5107	552.489
11	Saitama	64	Financial and insurance	6.11579	0	1.22373	0.454458	6.42264	1.16889	0.309082	2.86931	1.23011	1.5545	1.39745	1.2007	0.685484	0.450886	1.95904	0	0.999715	0.555107	0.0294684	2.9746	1.50141	0	0.0481835	1.35962	1.8359	2.43737	1.65845	0.177842	0.996651	0.0255664	0.118438	0.885111	0.229913	3.32785	2.86637	1.18607	1.97578	1.47559	1.52234	1.23932	0.141061	0.548839	0.368978	3.10691	0.208222	5.65042
11	Saitama	65	Real estate agencies and rental services	0.0283373	0	0.031169	0.0530799	0.197346	0.0774737	0.00476392	0.0692937	0.028586	0.0970059	0.0715085	0.0702578	0.0532719	0.015356	0.100119	0	0.0747809	0.0333154	0.00285601	0.0809457	0.206122	0	0.00790466	0.188765	0.0814377	0.138917	0.0723721	0.00744768	0.0382536	0.000938574	0.00494774	0.0626695	0.00714186	0.0748725	0.0469495	0.0974882	0.169468	0.0710251	0.0815175	0.059821	0.0107111	0.0468936	0.0352273	0.409983	0.0148385	0.572023
11	Saitama	66	House rent	0	0	0	0	0	0	0	0	0	0	0	0	0	0	0	0	0	0	0	0	0	0	0	0	0	0	0	0	0	0	0	0	0	0	0	0	0	0	0	0	0	0	0	0	0	0
11	Saitama	67	Transport	356.377	0	78.9726	7.17098	291.284	43.5287	2.45479	25.2787	63.9077	35.4806	56.7122	38.2777	21.3368	7.08815	43.4117	0	23.4217	9.95717	0.857803	39.1419	46.4316	0.017692	8.68056	76.9895	38.074	40.42	93.1294	2.69628	39.0046	0.739991	3.49842	37.207	10.5964	156.533	45.4049	37.7445	80.0249	37.5572	33.7725	24.4995	7.25218	22.6557	11.9835	91.7457	5.73807	135.684
11	Saitama	68	Communication	3.33684	0	0.71605	1.82488	5.45156	1.9573	0.231513	3.29288	0.904289	2.49285	1.94783	1.93179	1.75413	0.319825	3.3899	0	0.869032	0.427888	0.0462646	2.43336	37.8698	0	0.295495	5.63443	7.90321	2.69516	1.40683	0.168042	1.46627	0	0.187013	2.18093	0.106792	6.79514	3.56325	5.58733	5.76752	7.25855	4.52925	3.63391	0.780796	2.75866	2.30187	8.84956	0.781201	17.8554
11	Saitama	69	Broadcasting	0	0	0	0	0	0	0	0	0	0	0	0	0	0	0	0	0	0	0	0	0	0	0	0	0	0	0	0	0	0	0	0	0	0	0	0	0	0	0	0	0	0	0	0	0	0
11	Saitama	70	Information services	1.04063	0	0.0325305	0.0497016	2.29095	0.979755	0.0164077	0.240001	0.241492	0.736621	0.500242	0.355539	0.251494	0.195184	0.399889	0	0.489399	0.249522	0.0109295	0.58379	3.60831	0	0.0349037	1.60975	1.10787	0.735605	0.381347	0.0855032	0.575252	0.016163	0.0652177	0.475587	0.132449	1.00406	0.942702	0.472422	2.03218	1.22511	2.06446	0.713348	0.210538	1.49797	1.84907	4.76194	0.0965338	8.36744
11	Saitama	71	﻿Internet based services	0.000640396	0	0.000221989	0.000331792	0.00615408	0.00311517	0.000186611	0.0032641	0.00126766	0.00298421	0.0011597	0.00126742	0.00224277	0.000214829	0.00267886	0	0.000849071	0.000279648	0	0.00193093	0.0312444	0	0.000119092	0.00853903	0.00457112	0.00263645	0.00130843	0.000104192	0.00105525	0	0.000107673	0.0026005	0.0001076	0.0067682	0.00351925	0.00466971	0.00649404	0.00531887	0.00447452	0.00209223	0.000476789	0.00348045	0.00289036	0.0118887	0.000775	0.0261765
11	Saitama	72	Image information production and distribution industry	0.0159488	0	0.00746355	0.00688596	0.0586171	0.00550582	0.00557696	0.0594707	0.00789262	0.03171	0.0228832	0.0295355	0.00874256	0.0462795	0.0386952	0	0.00819398	0.00441086	0.000464366	0.0283471	0.125142	0	0.00266934	0.0577222	0.0918	0.0604069	0.0331291	0.00622768	0.0349533	0.000228908	0.00107262	0.0150253	0.00214378	0.0252839	0.0135709	0.0232594	0.111415	0.0377013	0.0420418	0.0179766	0.0102118	0.0315416	0.0287933	0.164852	0.00868548	0.326432
11	Saitama	73	Public administration	0	0	0	0	0	0	0	0	0	0	0	0	0	0	0	0	0	0	0	0	0	0	0	0	0	0	0	0	0	0	0	0	0	0	0	0	0	0	0	0	0	0	0	0	0	0
11	Saitama	74	Education and Research	1.09364	0	0.125634	0.915819	26.3772	5.29801	0.177872	1.93429	0.308366	3.61482	2.25329	2.23816	0.174272	4.63929	24.8957	0	10.1796	5.08114	0.444315	31.1916	137.143	0	0.319261	35.4075	30.7137	32.2101	6.14485	1.48349	9.81946	0.164268	0.737657	3.50119	0.0128201	7.90724	12.9376	5.22376	6.77329	12.9426	19.0409	4.51198	5.27174	27.4842	26.9723	123.462	8.89333	176.883
11	Saitama	75	Medical service, health and social security and nursing care	0.11908	0	0.0643943	0.0715674	1.01183	0.334101	0.01041	0.247253	0.066001	0.0843457	0.209007	0.107063	0.0609238	0.0431427	0.251056	0	0.111307	0.0436799	0.00832113	0.251714	0.989465	0	0.0186017	0.374793	0.47744	0.162368	0.138681	0.0139495	0.0753492	0.00205094	0.0120129	0.19497	0.0384151	0.134243	0.0785275	0.17598	0.489921	0.483864	0.283645	0.448179	0.0744725	0.161795	0.070736	0.445131	0.030263	1.00889
11	Saitama	76	Advertising and survery	0.0904553	0	0.0627116	0.0332593	10.9703	3.55309	0.015305	0.349115	0.110706	0.688024	1.13242	1.60543	0.0639799	0.10278	0.570264	0	0.0831776	0.0747527	0.010195	2.79132	6.21503	0	0.0032558	1.29634	1.35426	0.203737	0.147057	0.0541208	0.187519	0.00335039	0.0245302	0.178209	0.0215718	0.156478	0.184146	0.253434	0.503493	0.545288	0.546764	0.338424	0.186831	0.415843	0.406136	1.93083	0.213639	4.65028
11	Saitama	77	Giids rental and leasing services	5.18584	0	0.700977	0.780041	9.2921	1.48235	0.275276	1.50468	1.26125	2.28359	1.69426	1.26867	1.17322	0.128741	2.53401	0	0.420759	0.554321	0.0343813	1.24616	1.38091	0	0.944261	8.01537	4.60443	3.91342	5.18718	0.317001	3.62405	0.0593185	0.183649	2.56059	0.391849	1.12089	2.70558	1.64557	11.2237	8.2704	8.20376	4.48962	1.03301	8.23599	2.59602	14.2584	0.861887	39.8205
11	Saitama	78	Other business services	34.7252	0	3.78517	3.4212	66.5712	9.7026	0.529025	13.8944	7.83917	9.10688	7.1703	8.16734	10.7892	2.35548	23.1046	0	6.39812	2.51046	0.217655	10.6684	23.3657	0	1.55899	43.1257	37.4975	34.6534	18.4192	0.695001	12.3093	0.12262	0.628441	19.2284	0.744644	17.7764	15.5141	15.6003	27.1423	25.0654	18.2726	9.09752	3.63356	14.4213	11.9877	44.2376	4.13563	80.1923
11	Saitama	79	Personal services	0.266456	0	0.00692741	0	0.20889	0.0533098	0	0.0428882	0.0329654	0.0279376	0.0417571	0.0226007	0.0182577	0.00670397	0.0635333	0	0.0165601	0.0145445	0	0.0317139	0.0636606	0	0	0.0966316	0.0667706	0.0362002	0.0306233	0.00325143	0.00658605	0	0	0.0227224	0.00671551	0.0860479	0.0708528	0.022668	0.0868514	0.051071	0.0476018	0.0293805	0.0148787	0.0543055	0.0261861	0.182355	0.00604617	0.267338
11	Saitama	80	Activities not elsewhere classified	0	0	0	0	0	0	0	0	0	0	0	0	0	0	0	0	0	0	0	0	0	0	0	0	0	0	0	0	0	0	0	0	0	0	0	0	0	0	0	0	0	0	0	0	0	0
12	Chiba	1	Agriculture, forestry and fishery	782.631	0	0.0186222	0.352555	2204.41	57.4071	0.172198	0.389109	246.764	0.0166892	0	0.0303775	0	0.216259	1.63598	0	2.81345	0	0	2.30184	5.7104	0	0.25975	0	152.748	0	0	0	0.318682	0	0	0	0	0	0.0571397	0	0	0	0	0	0	0	0	0	0	0
12	Chiba	2	Metallic ores	0	0	0	0	0	0	0	0	0	0	0	0	0	0	0	0	0	0	0	0	0	0	0	0	0	0	0	0	0	0	0	0	0	0	0	0	0	0	0	0	0	0	0	0	0	0
12	Chiba	3	Non-metallic ores	0.191531	0	0.464751	0	0	0	0	0	0	0	3.5218	0.0180506	0	4.17635	27.6253	0	2.13734	0	0	1.49949	0.278305	0	9.23701	0	1.35744	101.708	65.9172	4.90283	47.5515	-0.0183265	0	0.684431	0	0.399851	0.0679061	0.0413815	0.0822116	0	0	0.312873	0	0	0	0	0	0
12	Chiba	4	Coal mining, crude petroleum and natural gas	0	0	0	0	0	0	0	0	0	0	0	0	0	0	0	0	0	0	0	0	0	0	0	0	0	0	0	0	0	0	0	0	0	0	0	0	0	0	0	0	0	0	0	0	0	0
12	Chiba	5	Food and Tobacco	508.13	0	0	0	1404.04	115.564	0	5.66295	0.105842	0	6.79285	0.018141	0	0.150671	0.751528	0	4.38116	0.0373584	0	5.98724	24.678	0	0	0.319657	0	0.655102	0	0.0835148	1.69167	0	0	0.0208442	0	0	0	0	0	0	0	0	0	0	0	0	0	0
12	Chiba	6	Beverage	17.4083	0	0	0	28.1559	43.2263	0	0	0	0	0	0	0	0	0	0	0.190227	0	0	0	0.865981	0	0	0	0	0	0	0	0	0	0	0	0	0	0	0	0	0	0	0	0	0	0	0	0	0
12	Chiba	7	Textile products	1.90183	0	0	0	0.222757	0.00471206	3.46516	88.7006	0.0842093	2.30423	1.44733	6.65201	0.0914487	0.146067	0	0	0	0	0.0393445	0.00953087	0	0	0	0.607207	9.59534	0.168131	0.00511283	0	0.336478	0	0	0.00975523	0	0	0.29278	0.0243297	0.299679	0.0431667	0.0906021	0.00490534	0	0	0	4.04876	0.749525	1.97284
12	Chiba	8	Wearing aparel and other textile products	3.58357	0	0.271454	0.0811447	2.0558	0.217674	0.0554181	3.07609	0.405984	0.483079	0.461273	0.357411	0.0476958	0.210158	0.164724	0	0.137199	0.0227973	0	0.269849	0.472656	0	0.291257	0.219653	0.455328	1.04639	0.22095	0.087366	0.486661	0	0.00752371	0.341618	0.0375929	0.0788219	0.412494	0.163149	0.767096	0.403822	0.259366	0.456861	0.056637	0.503286	0.254086	0.563205	0.172615	2.08185
12	Chiba	9	Timber and wooden products	2.67503	0	0.0455294	0.0317565	1.47034	0.284419	0	0.10218	34.0981	30.3088	0.00731847	0.828111	0.00799976	0.00440609	0	0	0.00435355	0.00764734	0	0.0958803	0	0	0	0.315624	0.0119684	1.12471	0.0626164	0.623991	0.714218	0	0	0.71683	0	0	1.50877	0.212832	1.04439	0.0839142	0.112628	0.042911	0.105611	0.11104	0.0382455	0.450471	0.0357638	0.96442
12	Chiba	10	Furniture and fixtures	0.523682	0	0.835044	0.868231	14.7266	0.723139	0.0915604	2.95017	0.483757	81.9624	1.48816	1.62868	0.510336	0.245946	2.48855	0	0.798475	0.396381	0	2.8256	5.7246	0	0.0389549	7.64268	2.64047	0.379447	0.855974	0.920192	1.65683	0	0.140879	2.96016	0	0.16399	1.55961	0.373378	1.95561	1.43868	1.1975	0.958111	0.249531	1.29657	1.58589	9.32645	1.07738	109.349
12	Chiba	11	Pulp, paper, paperboard, building paper	0.367833	0	0	0	8.3868	0.0554107	0.0192936	0.278267	1.62371	4.51832	178.11	109.872	32.389	0	3.00599	0	0	1.4392	0	6.19925	1.30249	0	0	5.45875	1.98427	7.4796	0	0.603252	3.67309	0	0	0	0.0370821	0	0.798128	0.0286102	0.277091	0.162154	0.00700935	0.63452	0	4.48468	0.0899708	6.04857	0.327184	6.34439
12	Chiba	12	Paper products	102.952	0	0	0	162.852	54.7644	0.334242	6.66693	0.378421	14.9187	1.70433	24.6901	1.16437	2.59088	6.90933	0	1.54613	0.422968	0.200381	29.901	55.2829	0	0.0284411	14.342	1.50973	44.4264	0.234356	7.24089	5.21663	0	0	0	0.616716	0	2.03335	0.0247822	12.1609	2.51603	0.437149	2.34839	0.956463	3.18622	1.58093	18.5751	3.56283	34.5076
12	Chiba	13	Publishing, printing	0.172237	0	0.0467255	0.0698374	34.2546	1.82608	0.124383	3.0013	0.266823	2.5893	0.250358	8.51136	15.9272	0.150728	1.08261	0	0.111698	0.150425	0.0457877	7.40846	2.65922	0	0.0250671	0.618864	0.696025	4.06951	0.160654	0.0950341	0.444231	0.00644884	0.0302181	1.17501	0.00754938	0.307785	0.621274	0.211142	2.42281	1.02625	1.53403	0.814708	1.64585	0.535871	0.791545	2.42463	1.50892	31.5627
12	Chiba	14	Chemical fertilizer	169.691	0	0	0	0.0431234	0.140479	0	0.0171543	0	0	0	0.0180796	0	60.622	14.2949	0	7.37612	1.13557	0	4.52597	1.86549	0	0	0	0.0582694	0.421215	0	0	0.189668	0	0.0430062	0	0	0.6508	0.0226717	0	0	0	0.020309	0	0	0	0	1.48894	0	0
12	Chiba	15	Basic inorganic chemical products	1.21117	0	0.0172539	0	17.9244	3.57718	2.11761	3.16456	0.0164213	0.30926	6.97517	1.04138	0.015158	21.6232	223.286	0	45.7994	4.57892	0.0869537	76.4616	42.0763	0	0.0740506	15.2138	116.322	44.2782	0.33899	1.65204	1.54195	0.342909	0.167376	1.19656	0.0669047	4.38377	1.62354	3.35526	2.99642	0.731408	0.648133	1.56112	0.118586	1.18726	0.92759	50.1485	0.210827	15.433
12	Chiba	16	Basic organic chemical products	0	0	0	0	1.81872	0	0	0	0	0	0.809155	0.117308	0.884481	33.8223	212.3	0	623.134	85.2763	0.724828	96.7904	5.98247	0	0	0.364772	2.89858	8.88231	0	0	1.09391	0	0	0	0	0	0	0	0	0.530163	0	0	0	0	0	0	0	0
12	Chiba	17	Organic chemical products	0.652942	0	0.135803	0	161.952	21.7621	15.6399	0.210192	7.3672	11.4404	105.544	71.1108	2.26682	10.7767	747.425	0	1281.29	1596.82	85.6639	1156.38	767.051	0	1.74852	718.816	2959.31	55.3533	0.80044	0.637401	195.991	0	0	0	0	13.6482	34.03	0.50786	4.41418	0.625739	0.622116	4.09577	3.15012	6.62412	1.71115	141.021	12.3269	41.5772
12	Chiba	18	Synthetic resins	0	0	0	0	0	0	0.220068	0	0.996622	49.7386	177.58	48.6831	4.82977	0	0	0	0	2.85814	23.9678	488.502	0	0	0	7968.12	4.35841	362.898	0	0	39.0757	0	0	0	0	0	109.244	0.244752	9.23864	0	0	6.90855	2.6989	49.9375	0	222.184	35.644	391.765
12	Chiba	19	Synthetic fibers	0	0	0	0	0	0	0	0	0	0	0	0	0	0	0	0	0	0	0	0	0	0	0	0	0	0	0	0	0	0	0	0	0	0	0	0	0	0	0	0	0	0	0	0	0	0
12	Chiba	20	Final chemical products	297.535	0	3.88748	0.377073	32.5603	1.96222	3.81741	8.86566	36.5403	45.3223	56.2392	34.373	40.6808	2.63013	5.97818	0	25.0996	6.84741	0.722401	343.562	44.3938	0	9.89248	44.6731	25.3216	15.5587	8.58404	0.0968823	21.7503	0	0.0667458	9.25308	0.133401	0.233087	7.0373	11.1608	33.2593	6.84789	10.2754	5.64177	9.39876	9.82866	4.2481	46.9038	2.16188	44.7266
12	Chiba	21	Medicaments	10.8851	0	0	0	1.11069	0	0	0.065456	0	0	0	0	0	0	0	0	0	0	0	0.335586	73.9635	0	0	0	0	0	0	0	0	0	0	0	0	0	0	0	0	0	0	0	0	0	0	0	0	0
12	Chiba	22	Petroleum refinery products	644.236	0	26.5344	2.7831	410.126	92.1838	27.8553	13.657	48.5743	12.6296	69.4877	29.3049	19.8535	88.9534	372.723	0	40.5472	10.0226	1.91948	111.362	96.0386	0.14076	233.074	105.507	70.53	347.402	51.384	18.3534	143.395	0.841069	3.20214	61.6321	3.93841	150.245	42.8512	21.0093	116.255	29.7173	47.8075	33.863	7.63509	20.5687	2.55954	58.1973	4.76476	27.5461
12	Chiba	23	Coal products	0	0	0.142461	0	0	0	0	0	0.067793	0	0.457989	0	0	5.16998	6.60153	0	69.8821	0	0	0.391316	0	0	0	0.361312	0	0	0	0	15.1694	0.235942	3.80044	40.3198	0.0690518	9.7326	0.874246	1.3319	0.264605	0	0.195785	0.134268	0	0.186131	0	0.0646569	0	0.0610863
12	Chiba	24	Plastic products	67.9709	0	0.0705089	0.316154	197.388	112.542	0.207452	20.0257	9.59617	58.7352	25.4725	116.398	55.3159	5.25407	30.9375	0	0.235974	0	0.296116	72.015	121.747	0	0	1550.57	105.679	33.3284	0.623382	0.496408	3.85448	0	0	0.231274	0	1.91087	30.541	2.10945	10.4442	9.38913	14.8581	15.6167	18.5664	45.6928	10.0689	501.806	28.0004	522.861
12	Chiba	25	Rubber products	4.83106	0	0.660368	0.374159	1.38546	0.105506	0.0108848	3.31681	0.209499	1.10241	0.801318	1.64752	0.35264	0.225553	0.212506	0	0.284771	0.119618	0	0.960307	1.85376	0	0.13893	1.49969	52.9512	0.0123025	0.292558	0	1.26797	0.0321674	0.276339	0.849432	0.0251046	0.0877291	0.185409	1.45269	1.38288	8.17372	21.3184	3.18517	3.00354	5.267	1.82731	6.31159	1.97771	26.9836
12	Chiba	26	Glass and glass products	0.708657	0	0	0	11.7484	84.2531	0.0688341	1.29906	0.155864	57.5701	0	0	0	0	8.30033	0	0.939576	0	0	11.396	46.0601	0	0	35.9971	1.90137	94.1372	0.482634	0	3.03611	0	0	0	0	0	5.65313	0.727272	4.98095	1.09416	0.900268	0	1.58283	0.356615	2.02912	116.656	2.21549	10.6036
12	Chiba	27	Cement and cement products	0.0133498	0	0	0.0553326	0	0	0	0	0	0	0	0	0	0	0	0	0	0	0	0.0127112	0	0	0.0297913	0	0	0	70.426	0	0.593944	0	0	0	0	0	0	0	0.244965	0	0	0	0	0	0	0.0252033	0	0
12	Chiba	28	Pottery, china and earthenware	0	0	0	0	0	0	0	0	0	0	0	0	0	0	0	0	0	0	0	0	0	0	0	0	0	0	0	0	0	0	0	0	0	0	0	0	0	0	0	0	0	0	0	0	0	0
12	Chiba	29	Other ceramic, stone and clay products	13.3055	0	0	0.11083	0.454413	0.0402803	0	0	0.148205	0.8174	3.27186	0.0181442	0.0195434	0.215281	39.3654	0	0.404158	0.672568	0	1.75167	2.53924	0	3.3416	1.50453	0.428835	40.5388	23.8855	3.86323	50.3146	2.00794	0.0863197	20.7227	0	18.7647	4.04997	2.74533	9.19343	23.8418	4.01516	6.43665	0.152893	7.88625	1.43888	33.0756	0.601889	15.3956
12	Chiba	30	Pig iron and crude steel	0	0	0	0	0	0	0	0	0	0	0	0	0	0	9.27711	0	0	0	0	0	0	0	0	0	0	0	0	0	-0.246921	246.687	5.29088	1429.24	17.6242	0	0	-5.58479	-63.1943	-14.8392	-35.4554	-3.67174	-0.892519	-7.2391	0	-44.5568	0	-28.0642
12	Chiba	31	steel products	1.73235	0	1.52437	8.28499	0	0	0	0.321733	3.42917	154.25	0	0	0	0	0	0	0	0	0	0	0	0	0	41.5902	46.0213	0	157.371	0	15.0196	0	788.981	780.006	1286.98	2.97323	9.35465	883.732	2525.43	575.826	514.215	618.304	19.2871	372.86	23.7474	433.85	75.1102	475.73
12	Chiba	32	Cast and forged steel products	0	0	0	0.0334555	0	0	0	0	0	1.02308	0	0	0	0	0	0	0	0	0	0	0	0	0	0	0	0	0.0989497	0.567324	0.510739	0	0	10.604	0	0	0.755499	28.7224	36.077	73.764	84.9343	77.6561	3.46146	34.7726	3.46911	13.2271	0.703308	7.45765
12	Chiba	33	Other iron or steel products	0	0	0	0	0	0	0	0	0.122336	113.527	0	0	0	0	4.09504	0	0.0614552	0	0	0.29423	0	0	0	0.489006	0	0	9.47036	0.301655	5.13264	0	0	12.8292	0	0	2.36644	237.885	777.482	87.0046	107.464	21.6248	4.36202	55.4768	0.107975	104.543	30.4029	36.1566
12	Chiba	34	Non-ferrous metals	0	0	0	0	0	0	0	0	0.00369966	0.104513	0.0499876	0	-0.054641	0	16.9962	0	0.115228	0	0	3.28159	0	0	0	0.15117	-0.00340616	1.7248	0	0.328412	1.65937	0.128761	0.177234	0.378871	-0.0113051	44.194	219.324	0.0872227	12.0179	-0.0895565	0.156707	0.183185	-0.00333962	1.25617	0.0685726	81.5475	0.0373204	1.13344
12	Chiba	35	Non-ferrous metal products	0	0	0	0.198701	22.8027	1.54462	0	0	0.843515	12.4505	0	0.993959	1.94657	0	4.36367	0	0	0	0	4.03717	2.80777	0	0	6.94949	4.17422	1.74731	0	0.145595	2.86489	0	0	0.145354	0	2.40194	106.988	56.9875	119.368	44.2269	25.9034	52.7502	2.76017	85.4773	15.1505	368.418	16.8245	244.76
12	Chiba	36	Metal products for construction and architecture	0.421145	0	0	0.363662	0	0	0	0	0.277884	5.49502	0	0	0	0	0	0	0	0	0	0	0	0	0	0	0	0	1.36241	0	0	0	0	0.205221	0	0	0.149314	50.773	14.1	3.29606	0	4.26533	0	0	0	0	0	1.12677
12	Chiba	37	Other metal products	16.6518	0	13.4963	8.89636	60.2679	307.578	0	9.60903	33.4759	119.279	5.13985	2.54029	0.8391	0	61.5785	0	27.0415	3.41779	0	37.9465	63.3088	0	1.38125	14.9908	137.181	11.6394	28.8008	5.14563	20.7274	0	0	27.4758	0.0402568	2.95426	9.98126	82.735	425.15	146.646	126.317	87.7883	29.4333	79.4318	29.4067	135.927	26.5671	490.142
12	Chiba	38	General industrial machinery	0.173436	0	0.979109	0.20539	0	0	0	0	0.0245225	0.646562	0	0	0	0	0	0	0	0	0	0	0	0	0.0276457	22.8065	0	38.0186	0.0253114	0.411178	2.20467	0	0	3.57375	0.199823	0.203668	0.448004	0.770853	4.02002	371.101	72.7093	13.5749	8.12394	8.50584	4.41535	3.62516	8.16326	5.67881
12	Chiba	39	Special industrial machinery	0	0	0	0	0	0	0	0	0	0	0	0	0	0	0	0	0	0	0	0	0	0	0	0	0	0.416281	0	0	0	0	0	0	0	0	0	0	0	3.38389	350.021	0.0196638	0.0537731	0.0363456	0.0525775	1.30674	0.127467	0
12	Chiba	40	Other general machines	0	0	0.352355	0.0487631	0	0	0	0	0.0558917	4.65777	0	0	0	0	0	0	0	0	0	0.0985781	0	0	0	0.628864	0	0.0557964	0.00961493	0.422639	0.809565	0	0	1.18327	0	0	0.300321	0.41178	1.20893	14.2511	16.1952	44.2788	0.815649	12.1656	1.85812	1.21716	1.30701	10.7188
12	Chiba	41	Machinery for office and service industry	0	0	0	0	0	0	0	0	0	0	0	0	0	0	0	0	0	0	0	0	0	0	0	0	0	0	0	0	0	0	0	0	0	0	0	0	0	0	0	0	22.5324	0	0	0	0	0
12	Chiba	42	Industrial electric equipment	0.164438	0	0.00855019	0	0	0	0	0	0.00813756	0.0613015	0	0	0	0	0	0	0	0	0	0	0	0	0	0.00722837	0	0	0	0	0	0	0	0	0	0	0.00874504	0.439656	0.0555835	10.7395	16.1374	0.330397	2.58566	58.0378	5.25026	3.74086	3.41037	38.1731
12	Chiba	43	Applied electric equipment and electric mesuring instruments	0	0	0	0	0	0	0	0	0	0	0	0	0	0	0	0	0	0	0	0	0	0	0	0	0	0	0	0	0	0	0	0	0	0	0	0	0	1.593	8.16589	0.493249	0.831111	2.3345	25.4447	0	0	0.843227
12	Chiba	44	Other electric equipment	0.195408	0	0.00483837	0	0.065889	0	0	0	0	0.177782	0	0	0	0	0.0140129	0	0	0	0	0.0664507	0.00468032	0	0	0.00818076	0	0	0	0	0	0	0	0	0	0	0.00989726	0	0.283081	0.138221	0.647207	0.177844	0.311755	1.5298	1.01608	44.6431	0.971261	16.5848
12	Chiba	45	Household electric and electric applications	0	0	0	0	0	0	0	0	0	0	0	0	0	0	0	0	0	0	0	0	0	0	0	0.00662469	0	0	0	0	0	0	0	0	0	0	0	0	0	0	0	0	0	0	0	0	12.6322	0
12	Chiba	46	Communication equipment	0.0014997	0	0	0	0	0.0056479	0	0.00120694	0	0.0013977	0.00125345	0	0.00137014	0	0.00150562	0	0	0	0	0	0.0482765	0	0	0.00131848	0.00819941	0.00296358	0.00153207	0	0	0	0	0.00146159	0	0.00704444	0.00159513	0.00291618	0.00289675	0.045991	0.014289	0.00146989	0	0	0.0275116	0.0113253	0.00136119	16.6382
12	Chiba	47	Electric computing equipment and accessory equipment	0	0	0	0	0	0	0	0	0	0	0	0	0	0	0	0	0	0	0	0	0	0	0	0	0	0	0	0	0	0	0	0	0	0	0	0	0	0	0.271335	0	0	0	0	0	0	0.0495037
12	Chiba	48	Semiconductor devices and integrated circuits	0	0	0	0	0	0	0	0	0	0	0	0	0	0	0	0	0	0	0	0	0	0	0	0	0	0	0	0	0	0	0	0	0	0	0	0	0.0855574	0.0399521	0.423689	0.148119	1.84989	2.3979	9.33663	0.345976	2.16784	70.3793
12	Chiba	49	Other electrical equipment	0	0	0	0	0.0854471	0.0265099	0	0	0	0	0	0.0477651	1.38912	0	0	0	0	0	0	0	0.0566495	0	0	0.0247545	0	0	0	0	0	0	0	0	0	0	0.718765	0	5.16673	10.4967	14.3528	1.71103	46.8407	49.4281	262.127	6.03343	48.506	2169.93
12	Chiba	50	Passenger motor cars	0	0	0	0	0	0	0	0	0	0	0	0	0	0	0	0	0	0	0	0	0	0	0	0	0	0	0	0	0	0	0	0	0	0	0	0	0	0	0	0	0	0	0	0	0	0
12	Chiba	51	Other cars	0	0	0	0	0	0	0	0	0	0	0	0	0	0	0	0	0	0	0	0	0	0	0	0	0	0	0	0	0	0	0	0	0	0	0	0	0	0	0	0	0	0	0	0	0	0
12	Chiba	52	Motor vheicle parts and accessories	0	0	0	0	0	0	0	0	0	0	0	0	0	0	0	0	0	0	0	0	0	0	0	0	0	0	0	0	0	0	0	0	0	0	0	0	0	0	0.150556	0	0	0	0	0	0	0
12	Chiba	53	Other transportation equipment	3.72791	0	0.00328262	0	0	0	0	0	0	0	0	0	0	0	0	0	0	0	0	0	0	0	0	0	0	0	0	0	0	0	0	0	0	0	0	0	0	0	0	0	0	0	0	0	0	0
12	Chiba	54	Precision instruments	0.346518	0	0	0.00997404	0.077894	0	0	0.00774649	0.00952678	0.00897085	0.104585	0.0163286	0	0	0.0483176	0	0	0	0	0.00916511	0.0580973	0	0	0.169248	0.017542	0	0.00983323	0.0281892	0.00951662	0	0	0.00938087	0	0	0	0.0280753	0.0185922	2.12163	7.52028	0.0377368	0.429983	1.23808	0.521324	0.0272582	0.017473	21.8814
12	Chiba	55	Miscellaneous manufacturing products	4.21541	0	1.59602	0.296858	3.18775	4.29636	0	33.0853	2.65318	14.3989	0.307857	0.208281	0.0560859	0.0411878	0.020544	0	0.223832	0	0	0.350719	0.0205852	0	0.136997	0.701628	0.093233	3.39675	0.0836192	1.69797	2.75151	0	0	4.84617	0	0.02403	2.5683	0.51728	0.711463	7.00099	0.33145	0.120339	0	0.296571	0.625653	0.48291	0.0742929	8.0116
12	Chiba	56	Reuse and recycling	0.0579184	0	0	0	0.0221684	1.45464	0	0	0	0	0.972091	0	0	0.430074	0.301737	0	0.0684896	0	0	0	0	0	0	3.124	0.021396	0.64032	0.151919	0.0595961	0.0882164	0.225121	0.00315831	1.76509	0.0599669	2.55696	4.29062	0	0.00302358	0	0	0	0	0	0	0.0177317	0	0
12	Chiba	57	Building construction and repair of construction	0	0	0	0	0	0	0	0	0	0	0	0	0	0	0	0	0	0	0	0	0	0	0	0	0	0	0	0	0	0	0	0	0	0	0	0	0	0	0	0	0	0	0	0	0	0
12	Chiba	58	Public construction	0	0	0	0	0	0	0	0	0	0	0	0	0	0	0	0	0	0	0	0	0	0	0	0	0	0	0	0	0	0	0	0	0	0	0	0	0	0	0	0	0	0	0	0	0	0
12	Chiba	59	Other civil enginnering and construction	0	0	0	0	0	0	0	0	0	0	0	0	0	0	0	0	0	0	0	0	0	0	0	0	0	0	0	0	0	0	0	0	0	0	0	0	0	0	0	0	0	0	0	0	0	0
12	Chiba	60	Electricity	49.5761	0	7.63626	12.315	97.5933	21.5597	3.28384	12.861	21.026	11.0368	100.414	10.9626	11.4784	10.8713	120.595	0	38.1342	6.02387	3.41091	28.5331	16.3535	0	3.1021	89.8391	54.9991	50.7873	9.82134	2.42395	36.6775	4.78834	2.71902	114.854	3.89389	93.4322	49.7285	9.61534	87.9293	22.0265	20.2409	22.0281	6.7311	12.5146	3.65223	66.5106	3.71767	36.1127
12	Chiba	61	Gas supply and heat supply	0.231442	0	0.080228	0.159882	54.7834	29.9981	1.68605	0.93131	0.381781	1.36611	5.60975	3.2718	0.0704824	10.3262	12.4698	0	5.2933	2.82985	0.20216	8.9618	13.5813	0	0.344323	17.1598	10.6854	96.8832	0.945748	4.29274	5.7206	0.398617	2.41264	32.8566	0.155548	2.08368	28.1453	4.65042	23.8423	3.54879	4.04278	2.34403	0.689254	4.96152	1.34786	54.4723	0.140044	17.6134
12	Chiba	62	Water supply and waste management services	0.244661	0	0.0751177	0.0446679	1.72653	0.755766	0.0692571	0.0525068	0.0795643	0.0716638	1.19674	0.128465	0.0617353	0.198152	1.03047	0	0.593161	0.465002	0.0264589	0.734376	0.912987	0	0.0103997	0.499845	0.231435	0.336133	0.378483	0.0204718	0.38703	0.010033	0.0399608	0.187348	0.0258394	0.400862	0.294927	0.0860873	0.320677	0.328255	0.44402	0.151872	0.028104	0.123472	0.0468162	0.640062	0.0296086	0.521593
12	Chiba	63	Commerce	183.037	0	5.46475	1.68079	537.762	47.5063	3.97273	77.7635	62.8633	74.762	127.067	75.2151	33.0431	8.74219	58.5841	0	52.121	16.1332	1.04213	74.9514	65.5385	0	9.94686	221.238	123.778	55.9083	28.7451	4.05676	30.2318	0.692651	4.67912	47.2549	21.6904	73.5783	63.35	43.6489	112.027	80.4985	82.7402	41.7555	23.9774	59.4506	45.9165	182.232	22.2053	480.903
12	Chiba	64	Financial and insurance	0.0234976	0	0.0047017	0.00174608	0.0246765	0.00449101	0.00118753	0.0110242	0.00472624	0.00597258	0.00536918	0.00461323	0.00263371	0.00173236	0.00752685	0	0.00384102	0.00213279	0.000113221	0.0114288	0.00576859	0	0.000185127	0.00522381	0.00705375	0.00936465	0.00637194	0.000683291	0.00382925	9.82291e-05	0.000455053	0.0034007	0.000883351	0.012786	0.0110129	0.00455702	0.00759118	0.0056694	0.005849	0.00476161	0.000541973	0.0021087	0.00141765	0.0119371	0.000800012	0.0217096
12	Chiba	65	Real estate agencies and rental services	0	0	0	0	0	0	0	0	0	0	0	0	0	0	0	0	0	0	0	0	0	0	0	0	0	0	0	0	0	0	0	0	0	0	0	0	0	0	0	0	0	0	0	0	0	0
12	Chiba	66	House rent	0	0	0	0	0	0	0	0	0	0	0	0	0	0	0	0	0	0	0	0	0	0	0	0	0	0	0	0	0	0	0	0	0	0	0	0	0	0	0	0	0	0	0	0	0	0
12	Chiba	67	Transport	424.443	0	94.056	8.5406	346.918	51.8425	2.92365	30.1068	76.1137	42.2572	67.5439	45.5885	25.412	8.44195	51.7032	0	27.8952	11.8589	1.02164	46.6178	55.2998	0.021071	10.3385	91.6942	45.346	48.14	110.917	3.21126	46.4543	0.881325	4.1666	44.3133	12.6202	186.43	54.077	44.9536	95.3092	44.7305	40.2228	29.1787	8.6373	26.9828	14.2723	109.269	6.83401	161.599
12	Chiba	68	Communication	1.6361	0	0.35109	0.894767	2.67298	0.959694	0.113514	1.61455	0.443387	1.22228	0.955051	0.947186	0.860079	0.156815	1.66212	0	0.4261	0.2098	0.0226842	1.19312	18.5682	0	0.144886	2.76265	3.87506	1.32148	0.68979	0.0823934	0.718933	0	0.0916955	1.06934	0.0523617	3.33176	1.74712	2.73955	2.8279	3.55898	2.22076	1.78176	0.382836	1.35261	1.12864	4.33908	0.383035	8.75477
12	Chiba	69	Broadcasting	0	0	0	0	0	0	0	0	0	0	0	0	0	0	0	0	0	0	0	0	0	0	0	0	0	0	0	0	0	0	0	0	0	0	0	0	0	0	0	0	0	0	0	0	0	0
12	Chiba	70	Information services	0	0	0	0	0	0	0	0	0	0	0	0	0	0	0	0	0	0	0	0	0	0	0	0	0	0	0	0	0	0	0	0	0	0	0	0	0	0	0	0	0	0	0	0	0	0
12	Chiba	71	﻿Internet based services	0	0	0	0	0	0	0	0	0	0	0	0	0	0	0	0	0	0	0	0	0	0	0	0	0	0	0	0	0	0	0	0	0	0	0	0	0	0	0	0	0	0	0	0	0	0
12	Chiba	72	Image information production and distribution industry	0.0091975	0	0.00430415	0.00397106	0.0338038	0.00317515	0.00321617	0.0342961	0.00455159	0.0182868	0.0131965	0.0170328	0.00504174	0.0266889	0.0223151	0	0.00472538	0.0025437	0.000267795	0.0163475	0.0721682	0	0.00153938	0.0332878	0.0529401	0.034836	0.0191052	0.00359144	0.0201572	0.000132009	0.000618569	0.00866495	0.00123629	0.0145809	0.0078262	0.0134135	0.0642518	0.021742	0.0242451	0.0103669	0.00588905	0.0181897	0.0166048	0.0950687	0.00500882	0.18825
12	Chiba	73	Public administration	0	0	0	0	0	0	0	0	0	0	0	0	0	0	0	0	0	0	0	0	0	0	0	0	0	0	0	0	0	0	0	0	0	0	0	0	0	0	0	0	0	0	0	0	0	0
12	Chiba	74	Education and Research	0.541677	0	0.0622258	0.453602	13.0645	2.62408	0.0880992	0.958045	0.152732	1.79041	1.11604	1.10855	0.0863163	2.29782	12.3307	0	5.0419	2.51667	0.220067	15.4491	67.9264	0	0.158128	17.5372	15.2124	15.9535	3.04352	0.734765	4.86354	0.0813612	0.365358	1.73412	0.00634973	3.91642	6.40793	2.58731	3.35478	6.4104	9.4309	2.23476	2.61107	13.6128	13.3593	61.1505	4.40483	87.6095
12	Chiba	75	Medical service, health and social security and nursing care	0.0117137	0	0.00633436	0.00703996	0.0995325	0.032865	0.00102401	0.0243218	0.0064924	0.00829694	0.0205597	0.0105317	0.00599297	0.00424388	0.0246959	0	0.0109491	0.00429672	0.000818536	0.0247606	0.097332	0	0.00182982	0.0368678	0.046965	0.0159719	0.0136418	0.00137219	0.00741197	0.000201748	0.00118169	0.0191789	0.00377883	0.0132053	0.00772462	0.0173108	0.0481927	0.0475969	0.0279017	0.0440866	0.00732573	0.0159155	0.00695818	0.0437868	0.00297692	0.0992431
12	Chiba	76	Advertising and survery	0	0	0	0	0	0	0	0	0	0	0	0	0	0	0	0	0	0	0	0	0	0	0	0	0	0	0	0	0	0	0	0	0	0	0	0	0	0	0	0	0	0	0	0	0	0
12	Chiba	77	Giids rental and leasing services	5.65204	0	0.763994	0.850166	10.1274	1.61561	0.300023	1.63995	1.37463	2.48888	1.84657	1.38272	1.27869	0.140315	2.76181	0	0.458585	0.604153	0.0374721	1.35819	1.50505	0	1.02915	8.73594	5.01836	4.26523	5.6535	0.345499	3.94985	0.0646512	0.200159	2.79078	0.427076	1.22165	2.9488	1.7935	12.2327	9.01389	8.94127	4.89323	1.12588	8.97639	2.8294	15.5402	0.939369	43.4003
12	Chiba	78	Other business services	34.3017	0	3.73902	3.37949	65.7595	9.58429	0.522574	13.725	7.74359	8.99584	7.08287	8.06775	10.6576	2.32676	22.8228	0	6.3201	2.47985	0.215001	10.5383	23.0808	0	1.53998	42.5998	37.0402	34.2308	18.1946	0.686527	12.1592	0.121125	0.620778	18.9939	0.735564	17.5596	15.3249	15.4101	26.8113	24.7598	18.0498	8.98658	3.58925	14.2454	11.8415	43.6982	4.0852	79.2145
12	Chiba	79	Personal services	0.54053	0	0.0140529	0	0.423753	0.108144	0	0.0870026	0.0668734	0.0566739	0.084708	0.0458476	0.0370374	0.0135996	0.128883	0	0.0335936	0.0295048	0	0.0643346	0.129141	0	0	0.196026	0.13545	0.0734353	0.062122	0.00659581	0.0133604	0	0	0.0460944	0.013623	0.174556	0.143731	0.0459841	0.176186	0.103602	0.0965646	0.059601	0.0301827	0.110164	0.0531209	0.369923	0.0122652	0.542319
12	Chiba	80	Activities not elsewhere classified	0	0	0	0	0	0	0	0	0	0	0	0	0	0	0	0	0	0	0	0	0	0	0	0	0	0	0	0	0	0	0	0	0	0	0	0	0	0	0	0	0	0	0	0	0	0
13	Tokyo	1	Agriculture, forestry and fishery	45.1767	0	0.00107495	0.020351	127.248	3.31378	0.00994	0.022461	14.2442	0.000963372	0	0.00175352	0	0.0124833	0.0944359	0	0.162404	0	0	0.132872	0.329628	0	0.0149938	0	8.81724	0	0	0	0.0183957	0	0	0	0	0	0.00329834	0	0	0	0	0	0	0	0	0	0	0
13	Tokyo	2	Metallic ores	0	0	0	0	0	0	0	0	0	0	0	0	0	0	0	0	0	0	0	0	0	0	0	0	0	0	0	0	0	0	0	0	0	0	0	0	0	0	0	0	0	0	0	0	0	0
13	Tokyo	3	Non-metallic ores	0.00358795	0	0.0087062	0	0	0	0	0	0	0	0.065974	0.000338143	0	0.0782357	0.517505	0	0.0400389	0	0	0.0280899	0.0052135	0	0.173037	0	0.025429	1.9053	1.23483	0.0918448	0.890784	-0.000343312	0	0.0128215	0	0.00749042	0.00127209	0.0007752	0.00154007	0	0	0.00586107	0	0	0	0	0	0
13	Tokyo	4	Coal mining, crude petroleum and natural gas	0	0	0	0	0	0	0	0	0	0	0	0	0	0	0	0	0	0	0	0	0	0	0	0	0	0	0	0	0	0	0	0	0	0	0	0	0	0	0	0	0	0	0	0	0	0
13	Tokyo	5	Food and Tobacco	271.502	0	0	0	750.204	61.748	0	3.02581	0.0565532	0	3.62953	0.00969304	0	0.0805059	0.401554	0	2.34093	0.0199612	0	3.19908	13.1859	0	0	0.170798	0	0.350032	0	0.0446233	0.903885	0	0	0.0111374	0	0	0	0	0	0	0	0	0	0	0	0	0	0
13	Tokyo	6	Beverage	3.7517	0	0	0	6.06793	9.3158	0	0	0	0	0	0	0	0	0	0	0.0409962	0	0	0	0.186629	0	0	0	0	0	0	0	0	0	0	0	0	0	0	0	0	0	0	0	0	0	0	0	0	0
13	Tokyo	7	Textile products	1.63101	0	0	0	0.191037	0.00404107	2.97173	76.0698	0.072218	1.97611	1.24123	5.70478	0.0784266	0.125267	0	0	0	0	0.0337419	0.00817369	0	0	0	0.520742	8.22899	0.14419	0.00438477	0	0.288564	0	0	0.00836611	0	0	0.251089	0.0208652	0.257006	0.0370199	0.0777005	0.00420683	0	0	0	3.47223	0.642795	1.69191
13	Tokyo	8	Wearing aparel and other textile products	6.13293	0	0.464567	0.138871	3.5183	0.372528	0.0948427	5.26442	0.694802	0.826742	0.789424	0.611674	0.0816268	0.359666	0.281909	0	0.234803	0.0390154	0	0.46182	0.808904	0	0.498458	0.375915	0.77925	1.79079	0.378134	0.149518	0.832872	0	0.0128761	0.584645	0.0643366	0.134896	0.705943	0.279214	1.31281	0.691102	0.443879	0.781873	0.0969287	0.861325	0.434843	0.96387	0.295413	3.56288
13	Tokyo	9	Timber and wooden products	2.29181	0	0.0390069	0.0272071	1.2597	0.243673	0	0.087542	29.2132	25.9668	0.00627004	0.709476	0.00685372	0.00377488	0	0	0.00372987	0.00655179	0	0.0821446	0	0	0	0.270408	0.0102538	0.963589	0.0536461	0.534599	0.611899	0	0	0.614137	0	0	1.29263	0.182342	0.894769	0.0718928	0.0964933	0.0367636	0.0904813	0.0951328	0.0327664	0.385937	0.0306403	0.826258
13	Tokyo	10	Furniture and fixtures	0.252004	0	0.401836	0.417806	7.08668	0.347985	0.0440602	1.41967	0.232791	39.4416	0.716126	0.783745	0.245581	0.118353	1.19753	0	0.384238	0.190745	0	1.35972	2.75477	0	0.0187457	3.67777	1.27063	0.182596	0.411908	0.44281	0.79729	0	0.067793	1.42447	0	0.0789146	0.750509	0.179675	0.941068	0.692313	0.576255	0.461057	0.120078	0.623929	0.763153	4.48803	0.518453	52.6202
13	Tokyo	11	Pulp, paper, paperboard, building paper	0.884899	0	0	0	20.1762	0.133302	0.0464146	0.669428	3.90618	10.8697	428.48	264.32	77.9185	0	7.23153	0	0	3.4623	0	14.9136	3.13342	0	0	13.1322	4.77356	17.9937	0	1.45125	8.83639	0	0	0	0.0892087	0	1.92006	0.0688277	0.666601	0.390095	0.0168624	1.52647	0	10.7888	0.216444	14.5511	0.787108	15.2627
13	Tokyo	12	Paper products	97.8203	0	0	0	154.735	52.0347	0.317582	6.33462	0.359558	14.1751	1.61938	23.4594	1.10633	2.46174	6.56494	0	1.46907	0.401885	0.190393	28.4106	52.5273	0	0.0270234	13.6271	1.43448	42.212	0.222675	6.87997	4.95661	0	0	0	0.585976	0	1.932	0.023547	11.5547	2.39062	0.41536	2.23133	0.908789	3.0274	1.50213	17.6492	3.38525	32.7876
13	Tokyo	13	Publishing, printing	1.79125	0	0.485942	0.726305	356.246	18.9911	1.29358	31.2133	2.77494	26.9285	2.60371	88.5176	165.642	1.56756	11.2591	0	1.16165	1.56441	0.47619	77.0475	27.6557	0	0.260697	6.43615	7.23862	42.3227	1.67079	0.988349	4.61997	0.0670676	0.314266	12.2201	0.078513	3.20095	6.46121	2.19587	25.1971	10.6729	15.9538	8.47291	17.1168	5.57303	8.23202	25.216	15.6926	328.25
13	Tokyo	14	Chemical fertilizer	4.22556	0	0	0	0.00107384	0.00349814	0	0.000427168	0	0	0	0.000450208	0	1.50958	0.355963	0	0.183676	0.0282774	0	0.112703	0.0464534	0	0	0	0.00145099	0.0104889	0	0	0.00472301	0	0.00107092	0	0	0.0162059	0.000564557	0	0	0	0.000505724	0	0	0	0	0.0370768	0	0
13	Tokyo	15	Basic inorganic chemical products	0.593755	0	0.00845842	0	8.78712	1.75365	1.03812	1.55137	0.00805022	0.151609	3.41945	0.51052	0.00743095	10.6003	109.462	0	22.4523	2.24473	0.0426274	37.4839	20.6271	0	0.0363019	7.45828	57.0248	21.7066	0.166183	0.809884	0.755913	0.168105	0.0820529	0.586592	0.0327988	2.14906	0.795909	1.64485	1.46894	0.358559	0.317735	0.765309	0.0581344	0.582032	0.454734	24.5844	0.103354	7.56573
13	Tokyo	16	Basic organic chemical products	0	0	0	0	0	0	0	0	0	0	0	0	0	0	0	0	0	0	0	0	0	0	0	0	0	0	0	0	0	0	0	0	0	0	0	0	0	0	0	0	0	0	0	0	0	0
13	Tokyo	17	Organic chemical products	0.00895032	0	0.00186155	0	2.21999	0.298308	0.214387	0.00288125	0.100987	0.156822	1.44677	0.974766	0.0310729	0.147723	10.2455	0	17.5635	21.8888	1.17425	15.8514	10.5145	0	0.0239682	9.85331	40.5652	0.758766	0.0109722	0.0087373	2.68658	0	0	0	0	0.187086	0.466472	0.00696159	0.0605082	0.00857743	0.00852777	0.0561436	0.0431808	0.0908014	0.0234559	1.93307	0.168973	0.569927
13	Tokyo	18	Synthetic resins	0	0	0	0	0	0	9.95752e-05	0	0.000450946	0.0225054	0.0803503	0.0220279	0.00218535	0	0	0	0	0.00129324	0.0108448	0.221035	0	0	0	3.60537	0.00197207	0.164202	0	0	0.0176807	0	0	0	0	0	0.0494302	0.000110744	0.00418025	0	0	0.00312594	0.00122118	0.0225955	0	0.100533	0.016128	0.177263
13	Tokyo	19	Synthetic fibers	0	0	0	0	0	0	0	0	0	0	0	0	0	0	0	0	0	0	0	0	0	0	0	0	0	0	0	0	0	0	0	0	0	0	0	0	0	0	0	0	0	0	0	0	0	0
13	Tokyo	20	Final chemical products	474.657	0	6.2017	0.601544	51.9435	3.13033	6.08991	14.1434	58.2927	72.3027	89.7184	54.8352	64.8981	4.19585	9.537	0	40.0413	10.9237	1.15245	548.084	70.8214	0	15.7815	71.2669	40.3955	24.8208	13.6941	0.154556	34.6983	0	0.10648	14.7614	0.212814	0.371844	11.2266	17.8048	53.0585	10.9244	16.3924	9.00032	14.9938	15.6797	6.777	74.8257	3.44885	71.3524
13	Tokyo	21	Medicaments	8.41555	0	0	0	0.858703	0	0	0.0506058	0	0	0	0	0	0	0	0	0	0	0	0.259451	57.1831	0	0	0	0	0	0	0	0	0	0	0	0	0	0	0	0	0	0	0	0	0	0	0	0	0
13	Tokyo	22	Petroleum refinery products	2.69124	0	0.110845	0.0116261	1.71327	0.38509	0.116363	0.0570508	0.202915	0.0527592	0.290279	0.122419	0.0829363	0.371595	1.55702	0	0.169382	0.0418684	0.00801846	0.465206	0.401193	0.000588013	0.973645	0.440746	0.294633	1.45124	0.214652	0.0766698	0.599019	0.00351349	0.0133767	0.257463	0.0164524	0.627636	0.179007	0.0877643	0.485645	0.124142	0.199712	0.14146	0.0318949	0.0859238	0.0106922	0.243114	0.0199043	0.115072
13	Tokyo	23	Coal products	0	0	0.00267176	0	0	0	0	0	0.00127141	0	0.00858925	0	0	0.0969593	0.123807	0	1.31059	0	0	0.00733885	0	0	0	0.00677615	0	0	0	0	0.284492	0.00442493	0.0712745	0.756169	0.00129502	0.182528	0.0163959	0.0249788	0.00496248	0	0.00367181	0.0025181	0	0.00349075	0	0.00121259	0	0.00114563
13	Tokyo	24	Plastic products	38.7538	0	0.0402008	0.180256	112.541	64.166	0.118279	11.4177	5.47128	33.488	14.5232	66.3646	31.5385	2.99562	17.6391	0	0.134541	0	0.168831	41.0595	69.4144	0	0	884.06	60.2532	19.0022	0.355423	0.283028	2.19764	0	0	0.131861	0	1.08949	17.413	1.20271	5.95481	5.35323	8.47139	8.90387	10.5857	26.0518	5.74079	286.106	15.9645	298.111
13	Tokyo	25	Rubber products	12.5795	0	1.71951	0.974264	3.60757	0.274723	0.0283427	8.63656	0.54551	2.87055	2.08653	4.28994	0.918231	0.587312	0.553339	0	0.741507	0.31147	0	2.50052	4.82696	0	0.361756	3.905	137.878	0.0320341	0.761784	0	3.30162	0.0837599	0.719553	2.21181	0.0653693	0.228436	0.482781	3.78261	3.60085	21.2833	55.5105	8.29378	7.82083	13.7146	4.75809	16.4346	5.14971	70.2618
13	Tokyo	26	Glass and glass products	0.226142	0	0	0	3.74906	26.8863	0.0219659	0.414548	0.0497384	18.3714	0	0	0	0	2.64874	0	0.299831	0	0	3.63661	14.6984	0	0	11.4871	0.606753	30.0404	0.154015	0	0.968864	0	0	0	0	0	1.80399	0.232082	1.58949	0.349161	0.287288	0	0.505103	0.113801	0.647521	37.2266	0.706993	3.38375
13	Tokyo	27	Cement and cement products	0.00565677	0	0	0.0234464	0	0	0	0	0	0	0	0	0	0	0	0	0	0	0	0.0053862	0	0	0.0126236	0	0	0	29.842	0	0.251675	0	0	0	0	0	0	0	0.1038	0	0	0	0	0	0	0.0106795	0	0
13	Tokyo	28	Pottery, china and earthenware	0	0	0	0	0.0320864	0.00682613	0	0	0	0.135987	0	0	0	0	0.025476	0	0	0	0	0.00517759	0	0	0	0.0111547	0	0.000895455	0.00925838	0.0725461	0	0	0	0.000883246	0	0	0	0	0.0113784	0.00173704	0.00431746	0	0.000809693	0.146944	0.00237507	0.0513295	0.00164515	0.168924
13	Tokyo	29	Other ceramic, stone and clay products	3.756	0	0	0.0312862	0.128276	0.0113707	0	0	0.0418366	0.230743	0.923612	0.0051219	0.0055169	0.0607717	11.1124	0	0.114089	0.189859	0	0.494479	0.716801	0	0.943297	0.424712	0.121056	11.4437	6.74261	1.09055	14.2033	0.566821	0.0243671	5.8498	0	5.29709	1.14326	0.774977	2.59521	6.73028	1.13344	1.817	0.0431602	2.2262	0.40618	9.33689	0.169907	4.34601
13	Tokyo	30	Pig iron and crude steel	0	0	0	0	0	0	0	0	0	0	0	0	0	0	0	0	0	0	0	0	0	0	0	0	0	0	0	0	0	0	0	0	0	0	0	0	0	0	0	0	0	0	0	0	0	0
13	Tokyo	31	steel products	0.1096	0	0.0964416	0.524162	0	0	0	0.020355	0.216952	9.75885	0	0	0	0	0	0	0	0	0	0	0	0	0	2.63127	2.91161	0	9.9563	0	0.950235	0	49.9161	49.3483	81.4227	0.188106	0.591837	55.9106	159.775	36.4305	32.5326	39.118	1.22023	23.5896	1.50241	27.4482	4.75196	30.0978
13	Tokyo	32	Cast and forged steel products	0	0	0	0.00935901	0	0	0	0	0	0.286201	0	0	0	0	0	0	0	0	0	0	0	0	0	0	0	0	0.0276807	0.158706	0.142877	0	0	2.96641	0	0	0.211347	8.03494	10.0924	20.6351	23.7599	21.7239	0.968326	9.72746	0.970465	3.7002	0.196747	2.08624
13	Tokyo	33	Other iron or steel products	0	0	0	0	0	0	0	0	0.0431045	40.0006	0	0	0	0	1.44286	0	0.0216534	0	0	0.10367	0	0	0	0.172298	0	0	3.33683	0.106286	1.80846	0	0	4.52031	0	0	0.833802	83.8174	273.941	30.6556	37.8642	7.61936	1.53693	19.5469	0.0380445	36.835	10.7123	12.7396
13	Tokyo	34	Non-ferrous metals	0	0	0	0	0	0	0	0	0.00547168	0.154571	0.0739301	0	-0.0808123	0	25.1369	0	0.170418	0	0	4.85337	0	0	0	0.223576	-0.00503761	2.55092	0	0.485712	2.45416	0.190433	0.262123	0.560339	-0.0167198	65.3616	324.373	0.129	17.7741	-0.132451	0.231765	0.270925	-0.0049392	1.85784	0.101417	120.606	0.0551957	1.67633
13	Tokyo	35	Non-ferrous metal products	0	0	0	0.0518114	5.94582	0.402762	0	0	0.219947	3.24648	0	0.259176	0.507569	0	1.13783	0	0	0	0	1.0527	0.732129	0	0	1.81209	1.08843	0.455612	0	0.037964	0.747022	0	0	0.0379012	0	0.626308	27.8972	14.8595	31.1254	11.5322	6.75433	13.7547	0.719717	22.2883	3.9505	96.0653	4.38701	63.8215
13	Tokyo	36	Metal products for construction and architecture	0.0673266	0	0	0.0581371	0	0	0	0	0.0444241	0.878466	0	0	0	0	0	0	0	0	0	0	0	0	0	0	0	0	0.217802	0	0	0	0	0.0328078	0	0	0.0238702	8.11686	2.25412	0.526927	0	0.681881	0	0	0	0	0	0.180132
13	Tokyo	37	Other metal products	12.8551	0	10.4191	6.86794	46.5265	237.448	0	7.41811	25.8432	92.0828	3.96793	1.96109	0.64778	0	47.5383	0	20.8758	2.63851	0	29.2944	48.874	0	1.06632	11.5728	105.903	8.98554	22.234	3.97239	16.0014	0	0	21.2112	0.031078	2.28067	7.70547	63.8709	328.213	113.21	97.5158	67.7721	22.7223	61.3208	22.7018	104.935	20.5097	378.386
13	Tokyo	38	General industrial machinery	0.20294	0	1.14566	0.240329	0	0	0	0	0.0286941	0.756549	0	0	0	0	0	0	0	0	0	0	0	0	0.0323485	26.6861	0	44.4859	0.0296171	0.481123	2.57971	0	0	4.18167	0.233815	0.238313	0.524214	0.901983	4.70387	434.229	85.0778	15.8841	9.5059	9.95276	5.16644	4.24184	9.5519	6.64483
13	Tokyo	39	Special industrial machinery	0	0	0	0	0	0	0	0	0	0	0	0	0	0	0	0	0	0	0	0	0	0	0	0	0	0.55434	0	0	0	0	0	0	0	0	0	0	0	4.50616	466.105	0.0261852	0.0716069	0.0483995	0.0700147	1.74011	0.169741	0
13	Tokyo	40	Other general machines	0	0	0.707731	0.0979442	0	0	0	0	0.112263	9.35547	0	0	0	0	0	0	0	0	0	0.198001	0	0	0	1.26312	0	0.112071	0.0193123	0.848901	1.62607	0	0	2.37668	0	0	0.603216	0.82709	2.42823	28.6244	32.5293	88.9372	1.63829	24.4355	3.73217	2.44475	2.62523	21.5295
13	Tokyo	41	Machinery for office and service industry	0	0	0	0	0	0	0	0	0	0	0	0	0	0	0	0	0	0	0	0	0	0	0	0	0	0	0	0	0	0	0	0	0	0	0	0	0	0	0	0	147.751	0	0	0	0	0
13	Tokyo	42	Industrial electric equipment	0.955509	0	0.0496832	0	0	0	0	0	0.0472855	0.356209	0	0	0	0	0	0	0	0	0	0	0	0	0	0.0420024	0	0	0	0	0	0	0	0	0	0	0.0508155	2.55474	0.322983	62.405	93.771	1.91986	15.0247	337.245	30.5081	21.7373	19.8169	221.815
13	Tokyo	43	Applied electric equipment and electric mesuring instruments	0	0	0	0	0	0	0	0	0	0	0	0	0	0	0	0	0	0	0	0	0	0	0	0	0	0	0	0	0	0	0	0	0	0	0	0	0	9.44965	48.4399	2.92594	4.93014	13.8482	150.937	0	0	5.00201
13	Tokyo	44	Other electric equipment	0.816931	0	0.0202275	0	0.275458	0	0	0	0	0.743242	0	0	0	0	0.0585827	0	0	0	0	0.277806	0.0195667	0	0	0.0342008	0	0	0	0	0	0	0	0	0	0	0.0413768	0	1.18346	0.577852	2.70574	0.743502	1.30333	6.39556	4.24785	186.637	4.06049	69.335
13	Tokyo	45	Household electric and electric applications	0	0	0	0	0	0	0	0	0	0	0	0	0	0	0	0	0	0	0	0	0	0	0	0.00223612	0	0	0	0	0	0	0	0	0	0	0	0	0	0	0	0	0	0	0	0	4.2639	0
13	Tokyo	46	Communication equipment	0.0604429	0	0	0	0	0.227629	0	0.0486438	0	0.0563321	0.0505183	0	0.0552211	0	0.0606817	0	0	0	0	0	1.9457	0	0	0.0531392	0.330464	0.119442	0.0617474	0	0	0	0	0.0589068	0	0.283914	0.064289	0.117532	0.116749	1.85359	0.575894	0.0592416	0	0	1.10881	0.456446	0.0548605	670.576
13	Tokyo	47	Electric computing equipment and accessory equipment	0	0	0	0	0	0	0	0	0	0	0	0	0	0	0	0	0	0	0	0	0	0	0	0	0	0	0	0	0	0	0	0	0	0	0	0	0	0	4.08653	0	0	0	0	0	0	0.745567
13	Tokyo	48	Semiconductor devices and integrated circuits	0	0	0	0	0	0	0	0	0	0	0	0	0	0	0	0	0	0	0	0	0	0	0	0	0	0	0	0	0	0	0	0	0	0	0	0	1.1716	0.547094	5.80188	2.0283	25.3319	32.8362	127.853	4.73771	29.6859	963.756
13	Tokyo	49	Other electrical equipment	0	0	0	0	0.0300829	0.00933317	0	0	0	0	0	0.0168164	0.489058	0	0	0	0	0	0	0	0.0199443	0	0	0.00871518	0	0	0	0	0	0	0	0	0	0	0.253052	0	1.81902	3.69551	5.05309	0.602393	16.4909	17.4019	92.2857	2.12415	17.0772	763.955
13	Tokyo	50	Passenger motor cars	0	0	0	0	0	0	0	0	0	0	0	0	0	0	0	0	0	0	0	0	0	0	0	0	0	0	0	0	0	0	0	0	0	0	0	0	0	0	0	0	0	0	0	0	0	0
13	Tokyo	51	Other cars	0	0	0	0	0	0	0	0	0	0	0	0	0	0	0	0	0	0	0	0	0	0	0	0	0	0	0	0	0	0	0	0	0	0	0	0	0	0	0	0	0	0	0	0	0	0
13	Tokyo	52	Motor vheicle parts and accessories	0	0	0	0	0	0	0	0	0	0	0	0	0	0	0	0	0	0	0	0	0	0	0	0	0	0	0	0	0	0	0	0	0	0	0	0	0	0	1.73691	0	0	0	0	0	0	0
13	Tokyo	53	Other transportation equipment	25.7514	0	0.0226755	0	0	0	0	0	0	0	0	0	0	0	0	0	0	0	0	0	0	0	0	0	0	0	0	0	0	0	0	0	0	0	0	0	0	0	0	0	0	0	0	0	0	0
13	Tokyo	54	Precision instruments	2.61995	0	0	0.0754117	0.588942	0	0	0.0585697	0.0720301	0.0678268	0.790747	0.123457	0	0	0.36532	0	0	0	0	0.0692956	0.439262	0	0	1.27965	0.132632	0	0.0743471	0.213133	0.0719533	0	0	0.0709269	0	0	0	0.212272	0.140572	16.0412	56.8593	0.28532	3.25102	9.36085	3.94163	0.206094	0.13211	165.441
13	Tokyo	55	Miscellaneous manufacturing products	5.52406	0	2.0915	0.389015	4.17737	5.63013	0	43.3564	3.47685	18.869	0.403429	0.272941	0.0734974	0.0539743	0.0269217	0	0.293319	0	0	0.459598	0.0269757	0	0.179526	0.919444	0.122177	4.45125	0.109578	2.22509	3.6057	0	0	6.35063	0	0.03149	3.36561	0.677866	0.932332	9.1744	0.434347	0.157697	0	0.388639	0.819883	0.632826	0.0973566	10.4988
13	Tokyo	56	Reuse and recycling	6.7869	0	0	0	2.5977	170.455	0	0	0	0	113.91	0	0	50.3963	35.3576	0	8.02564	0	0	0	0	0	0	366.071	2.5072	75.033	17.8019	6.9835	10.3372	26.3797	0.370092	206.835	7.02695	299.626	502.777	0	0.354305	0	0	0	0	0	0	2.07781	0	0
13	Tokyo	57	Building construction and repair of construction	0	0	0	0	0	0	0	0	0	0	0	0	0	0	0	0	0	0	0	0	0	0	0	0	0	0	0	0	0	0	0	0	0	0	0	0	0	0	0	0	0	0	0	0	0	0
13	Tokyo	58	Public construction	0	0	0	0	0	0	0	0	0	0	0	0	0	0	0	0	0	0	0	0	0	0	0	0	0	0	0	0	0	0	0	0	0	0	0	0	0	0	0	0	0	0	0	0	0	0
13	Tokyo	59	Other civil enginnering and construction	0	0	0	0	0	0	0	0	0	0	0	0	0	0	0	0	0	0	0	0	0	0	0	0	0	0	0	0	0	0	0	0	0	0	0	0	0	0	0	0	0	0	0	0	0	0
13	Tokyo	60	Electricity	0	0	0	0	0	0	0	0	0	0	0	0	0	0	0	0	0	0	0	0	0	0	0	0	0	0	0	0	0	0	0	0	0	0	0	0	0	0	0	0	0	0	0	0	0	0
13	Tokyo	61	Gas supply and heat supply	0	0	0	0	0	0	0	0	0	0	0	0	0	0	0	0	0	0	0	0	0	0	0	0	0	0	0	0	0	0	0	0	0	0	0	0	0	0	0	0	0	0	0	0	0	0
13	Tokyo	62	Water supply and waste management services	0	0	0	0	0	0	0	0	0	0	0	0	0	0	0	0	0	0	0	0	0	0	0	0	0	0	0	0	0	0	0	0	0	0	0	0	0	0	0	0	0	0	0	0	0	0
13	Tokyo	63	Commerce	2681.24	0	80.0511	24.6212	7877.48	695.903	58.195	1139.13	920.862	1095.16	1861.36	1101.8	484.036	128.061	858.177	0	763.502	236.33	15.2658	1097.94	960.051	0	145.708	3240.83	1813.18	818.981	421.077	59.426	442.855	10.1464	68.5428	692.221	317.735	1077.82	927.991	639.398	1641.04	1179.19	1212.03	611.662	351.236	870.87	672.614	2669.45	325.277	7044.57
13	Tokyo	64	Financial and insurance	556.396	0	111.331	41.3452	584.312	106.342	28.1193	261.041	111.912	141.424	127.136	109.236	62.3632	41.0202	178.227	0	90.9509	50.5019	2.68094	270.62	136.594	0	4.38358	123.694	167.025	221.744	150.88	16.1795	90.6722	2.32595	10.7751	80.5246	20.9167	302.758	260.773	107.905	179.751	134.245	138.498	112.75	12.8333	49.9316	33.5684	282.657	18.9434	514.058
13	Tokyo	65	Real estate agencies and rental services	0.108434	0	0.119269	0.203113	0.755154	0.296457	0.0182294	0.265155	0.109386	0.371198	0.273631	0.268845	0.203847	0.0587605	0.383111	0	0.286152	0.127483	0.0109286	0.309742	0.788734	0	0.0302476	0.722316	0.311625	0.531573	0.276935	0.0284989	0.146379	0.0035915	0.0189327	0.239808	0.0273286	0.286503	0.179654	0.373043	0.648477	0.271781	0.311931	0.228908	0.0409867	0.179441	0.134799	1.56882	0.0567802	2.18887
13	Tokyo	66	House rent	0	0	0	0	0	0	0	0	0	0	0	0	0	0	0	0	0	0	0	0	0	0	0	0	0	0	0	0	0	0	0	0	0	0	0	0	0	0	0	0	0	0	0	0	0	0
13	Tokyo	67	Transport	1474.35	0	326.714	29.6668	1205.06	180.081	10.1556	104.579	264.39	146.785	234.621	158.357	88.2714	29.3241	179.597	0	96.8971	41.1934	3.54878	161.932	192.09	0.0731927	35.912	318.51	157.514	167.22	385.282	11.1547	161.364	3.06138	14.4732	153.927	43.8379	647.586	187.843	156.151	331.068	155.376	139.719	101.356	30.0027	93.7279	49.5765	379.557	23.7387	561.333
13	Tokyo	68	Communication	0.242559	0	0.0520506	0.132653	0.39628	0.142278	0.0168289	0.239363	0.0657339	0.181209	0.14159	0.140424	0.12751	0.0232485	0.246416	0	0.063171	0.0311037	0.00336303	0.176884	2.7528	0	0.0214799	0.409574	0.574494	0.195914	0.102264	0.0122151	0.106585	0	0.0135942	0.158534	0.00776283	0.493947	0.259017	0.40615	0.419248	0.527633	0.329237	0.264154	0.056757	0.200531	0.167326	0.643286	0.0567865	1.29793
13	Tokyo	69	Broadcasting	0	0	0	0	0	0	0	0	0	0	0	0	0	0	0	0	0	0	0	0	0	0	0	0	0	0	0	0	0	0	0	0	0	0	0	0	0	0	0	0	0	0	0	0	0	0
13	Tokyo	70	Information services	477.937	0	14.9406	22.8269	1052.18	449.98	7.53569	110.227	110.912	338.314	229.75	163.291	115.506	89.6436	183.66	0	224.77	114.6	5.01967	268.122	1657.22	0	16.0305	739.324	508.822	337.847	175.145	39.2697	264.201	7.4233	29.9531	218.427	60.8309	461.143	432.963	216.973	933.337	562.664	948.162	327.625	96.6957	687.985	849.237	2187.06	44.3359	3842.98
13	Tokyo	71	﻿Internet based services	3.30353	0	1.14515	1.71158	31.7463	16.0698	0.962647	16.8381	6.5393	15.3943	5.98238	6.5381	11.5695	1.10821	13.8191	0	4.38	1.44259	0	9.96083	161.176	0	0.614346	44.0492	23.5804	13.6003	6.74965	0.537484	5.44361	0	0.555439	13.4149	0.555061	34.9143	18.1543	24.089	33.5	27.4378	23.0822	10.7929	2.45955	17.9542	14.9101	61.3285	3.9979	135.034
13	Tokyo	72	Image information production and distribution industry	26.7721	0	12.5285	11.559	98.3962	9.24222	9.36164	99.8292	13.2488	53.2293	38.4124	49.5791	14.6755	77.686	64.9547	0	13.7546	7.40419	0.779497	47.5843	210.067	0	4.48083	96.8941	154.098	101.401	55.6114	10.454	58.6735	0.384251	1.80053	25.2219	3.5986	42.4422	22.7805	39.0439	187.024	63.2865	70.5725	30.176	17.1419	52.9466	48.3332	276.726	14.5797	547.958
13	Tokyo	73	Public administration	0	0	0	0	0	0	0	0	0	0	0	0	0	0	0	0	0	0	0	0	0	0	0	0	0	0	0	0	0	0	0	0	0	0	0	0	0	0	0	0	0	0	0	0	0	0
13	Tokyo	74	Education and Research	6.02478	0	0.692104	5.04517	145.309	29.1863	0.979879	10.6558	1.69876	19.9137	12.4131	12.3298	0.96005	25.5574	137.148	0	56.0784	27.9916	2.44769	171.832	755.508	0	1.75878	195.057	169.199	177.443	33.8514	8.17239	54.0945	0.904937	4.06369	19.2877	0.0706246	43.5603	71.272	28.7772	37.3135	71.2994	104.895	24.8561	29.0415	151.408	148.588	680.143	48.9925	974.433
13	Tokyo	75	Medical service, health and social security and nursing care	0.000773443	0	0.00041825	0.00046484	0.00657201	0.00217004	6.76142e-05	0.00160594	0.000428686	0.000547838	0.00135753	0.000695393	0.000395709	0.000280218	0.00163064	0	0.000722958	0.000283707	5.4047e-05	0.00163492	0.00642672	0	0.000120821	0.00243434	0.00310104	0.0010546	0.000900754	9.06041e-05	0.000489404	1.33212e-05	7.80257e-05	0.00126636	0.000249512	0.000871929	0.000510048	0.00114301	0.00318211	0.00314277	0.00184232	0.00291099	0.00048371	0.00105088	0.000459441	0.00289119	0.000196562	0.00655291
13	Tokyo	76	Advertising and survery	49.4865	0	34.3084	18.1956	6001.64	1943.83	8.3731	190.995	60.5655	376.406	619.525	878.301	35.0023	56.2289	311.982	0	45.505	40.8959	5.57749	1527.08	3400.13	0	1.78119	709.207	740.891	111.461	80.4524	29.6086	102.588	1.83294	13.42	97.4948	11.8016	85.6064	100.743	138.65	275.452	298.317	299.125	185.146	102.212	227.5	222.19	1056.32	116.878	2544.09
13	Tokyo	77	Giids rental and leasing services	420.926	0	56.8972	63.3147	754.224	120.32	22.3437	122.132	102.374	185.355	137.52	102.976	95.2281	10.4497	205.681	0	34.1523	44.9933	2.79067	101.149	112.086	0	76.6441	650.594	373.734	317.646	421.035	25.7304	294.158	4.81479	14.9065	207.838	31.8057	90.9805	219.607	133.568	911.008	671.294	665.886	364.415	83.8477	668.502	210.715	1157.33	69.9579	3232.17
13	Tokyo	78	Other business services	806.868	0	87.9516	79.4945	1546.84	225.448	12.2923	322.849	182.15	211.606	166.608	189.775	250.695	54.7315	536.854	0	148.666	58.3326	5.0574	247.888	542.922	0	36.2244	1002.06	871.285	805.2	427.985	16.1489	286.018	2.84918	14.6024	446.787	17.3024	413.049	360.484	362.486	630.674	582.416	424.58	211.388	84.4287	335.09	278.543	1027.9	96.0948	1863.34
13	Tokyo	79	Personal services	0.172162	0	0.00447592	0	0.134968	0.0344445	0	0.0277108	0.0212996	0.018051	0.02698	0.0146027	0.0117967	0.00433155	0.04105	0	0.0106998	0.00939747	0	0.020491	0.0411323	0	0	0.0624355	0.0431417	0.0233896	0.0197862	0.00210081	0.00425537	0	0	0.0146813	0.00433901	0.0555971	0.0457793	0.0146462	0.0561163	0.0329979	0.0307564	0.0189833	0.00961338	0.0350878	0.0169193	0.117823	0.00390654	0.172732
13	Tokyo	80	Activities not elsewhere classified	0	0	0	0	0	0	0	0	0	0	0	0	0	0	0	0	0	0	0	0	0	0	0	0	0	0	0	0	0	0	0	0	0	0	0	0	0	0	0	0	0	0	0	0	0	0
14	Kanagawa	1	Agriculture, forestry and fishery	118.557	0	0.00282098	0.0534068	333.935	8.6963	0.0260854	0.0589442	37.381	0.00252816	0	0.00460173	0	0.0327599	0.247827	0	0.426196	0	0	0.348693	0.865039	0	0.0393481	0	23.139	0	0	0	0.0482755	0	0	0	0	0	0.0086558	0	0	0	0	0	0	0	0	0	0	0
14	Kanagawa	2	Metallic ores	0	0	0	0	0	0	0	0	0	0	0	0	0	0	0	0	0	0	0	0	0	0	0	0	0	0	0	0	0	0	0	0	0	0	0	0	0	0	0	0	0	0	0	0	0	0
14	Kanagawa	3	Non-metallic ores	0.0119761	0	0.02906	0	0	0	0	0	0	0	0.220212	0.00112867	0	0.261139	1.72736	0	0.133644	0	0	0.0937601	0.0174019	0	0.577573	0	0.0848783	6.3596	4.12168	0.306565	2.97331	-0.00114592	0	0.0427962	0	0.0250019	0.00424604	0.00258751	0.00514054	0	0	0.0195634	0	0	0	0	0	0
14	Kanagawa	4	Coal mining, crude petroleum and natural gas	0	0	0	0	0	0	0	0	0	0	0	0	0	0	0	0	0	0	0	0	0	0	0	0	0	0	0	0	0	0	0	0	0	0	0	0	0	0	0	0	0	0	0	0	0	0
14	Kanagawa	5	Food and Tobacco	542.932	0	0	0	1500.21	123.479	0	6.05081	0.113091	0	7.2581	0.0193835	0	0.16099	0.803001	0	4.68123	0.0399171	0	6.39732	26.3682	0	0	0.34155	0	0.69997	0	0.0892348	1.80753	0	0	0.0222718	0	0	0	0	0	0	0	0	0	0	0	0	0	0
14	Kanagawa	6	Beverage	15.5791	0	0	0	25.1973	38.6843	0	0	0	0	0	0	0	0	0	0	0.170238	0	0	0	0.774988	0	0	0	0	0	0	0	0	0	0	0	0	0	0	0	0	0	0	0	0	0	0	0	0	0
14	Kanagawa	7	Textile products	3.27522	0	0	0	0.383619	0.00811482	5.96749	152.755	0.14502	3.9682	2.4925	11.4557	0.157488	0.251548	0	0	0	0	0.0677567	0.0164135	0	0	0	1.0457	16.5245	0.289546	0.00880501	0	0.579462	0	0	0.0167999	0	0	0.504209	0.0418992	0.51609	0.0743391	0.15603	0.00844769	0	0	0	6.97254	1.29079	3.39751
14	Kanagawa	8	Wearing aparel and other textile products	5.24027	0	0.396948	0.118658	3.0062	0.318306	0.0810381	4.49817	0.593671	0.706407	0.674521	0.522643	0.0697458	0.307315	0.240877	0	0.200627	0.0333366	0	0.394601	0.691166	0	0.425906	0.321199	0.665828	1.53014	0.323096	0.127756	0.711645	0	0.011002	0.499549	0.0549722	0.115262	0.603191	0.238574	1.12173	0.59051	0.379271	0.668069	0.0828205	0.735957	0.37155	0.823576	0.252415	3.0443
14	Kanagawa	9	Timber and wooden products	0.348576	0	0.00593282	0.00413811	0.191595	0.0370619	0	0.0133148	4.44323	3.94946	0.000953651	0.107909	0.00104243	0.000574146	0	0	0.0005673	0.000996504	0	0.0124939	0	0	0	0.0411282	0.00155957	0.146559	0.00815938	0.0813106	0.0930678	0	0	0.0934082	0	0	0.196604	0.0277336	0.136091	0.0109346	0.0146763	0.00559162	0.0137619	0.0144694	0.00498366	0.0586997	0.00466029	0.125671
14	Kanagawa	10	Furniture and fixtures	0.507592	0	0.809387	0.841555	14.2742	0.700921	0.0887472	2.85953	0.468894	79.4442	1.44244	1.57864	0.494656	0.23839	2.41209	0	0.773942	0.384202	0	2.73878	5.54872	0	0.037758	7.40786	2.55934	0.367789	0.829675	0.89192	1.60592	0	0.13655	2.86921	0	0.158952	1.51169	0.361906	1.89552	1.39447	1.16071	0.928673	0.241864	1.25673	1.53716	9.0399	1.04428	105.989
14	Kanagawa	11	Pulp, paper, paperboard, building paper	0.498133	0	0	0	11.3577	0.0750392	0.026128	0.376839	2.19889	6.11887	241.203	148.793	43.8624	0	4.07082	0	0	1.94902	0	8.39525	1.76388	0	0	7.39244	2.68717	10.1292	0	0.816946	4.97424	0	0	0	0.0502179	0	1.08085	0.038745	0.375247	0.219595	0.00949232	0.85929	0	6.07332	0.121842	8.1912	0.443084	8.5918
14	Kanagawa	12	Paper products	123.431	0	0	0	195.247	65.6584	0.400731	7.99314	0.453697	17.8863	2.04336	29.6015	1.39599	3.10627	8.28376	0	1.8537	0.507106	0.240241	35.849	66.2799	0	0.0340987	17.195	1.81006	53.2638	0.280975	8.68127	6.25434	0	0	0	0.739395	0	2.43783	0.029712	14.5799	3.01653	0.524108	2.81554	1.14673	3.82003	1.89541	22.2701	4.27157	41.3719
14	Kanagawa	13	Publishing, printing	0.309173	0	0.0838745	0.125361	61.4887	3.2779	0.223273	5.38747	0.47896	4.64791	0.449404	15.2783	28.5901	0.270564	1.94334	0	0.200503	0.270019	0.0821912	13.2985	4.77342	0	0.0449967	1.11089	1.2494	7.30497	0.288381	0.170591	0.797415	0.011576	0.0542429	2.10921	0.0135515	0.552489	1.11522	0.37901	4.34906	1.84216	2.75365	1.46244	2.95439	0.961914	1.42086	4.35232	2.70858	56.6565
14	Kanagawa	14	Chemical fertilizer	201.631	0	0	0	0.0512401	0.16692	0	0.0203831	0	0	0	0.0214825	0	72.0323	16.9855	0	8.76446	1.34931	0	5.37785	2.21661	0	0	0	0.0692368	0.500496	0	0	0.225367	0	0.0511009	0	0	0.773293	0.0269389	0	0	0	0.0241316	0	0	0	0	1.76919	0	0
14	Kanagawa	15	Basic inorganic chemical products	1.54301	0	0.0219812	0	22.8354	4.55727	2.6978	4.03159	0.0209204	0.393991	8.88623	1.32671	0.0193111	27.5475	284.463	0	58.3476	5.83346	0.110777	97.4106	53.6044	0	0.0943391	19.3821	148.192	56.4096	0.431866	2.10467	1.96442	0.436859	0.213234	1.5244	0.0852353	5.58484	2.06836	4.27454	3.81738	0.9318	0.825709	1.98884	0.151076	1.51255	1.18173	63.8883	0.268589	19.6613
14	Kanagawa	16	Basic organic chemical products	0	0	0	0	1.4765	0	0	0	0	0	0.6569	0.0952345	0.718052	27.4581	172.352	0	505.882	69.2302	0.588441	78.5778	4.85677	0	0	0.296134	2.35317	7.21096	0	0	0.88807	0	0	0	0	0	0	0	0	0.430404	0	0	0	0	0	0	0	0
14	Kanagawa	17	Organic chemical products	0.531065	0	0.110454	0	131.722	17.7	12.7206	0.170958	5.99206	9.305	85.8436	57.8375	1.8437	8.76512	607.913	0	1042.13	1298.76	69.6741	940.536	623.876	0	1.42215	584.644	2406.93	45.0212	0.651032	0.518426	159.408	0	0	0	0	11.1007	27.678	0.413064	3.59024	0.50894	0.505993	3.33127	2.56213	5.38768	1.39175	114.698	10.026	33.8165
14	Kanagawa	18	Synthetic resins	0	0	0	0	0	0	0.0554533	0	0.251131	12.5332	44.7469	12.2673	1.21702	0	0	0	0	0.720201	6.03945	123.094	0	0	0	2007.82	1.09824	91.4439	0	0	9.84638	0	0	0	0	0	27.5276	0.0616733	2.32797	0	0	1.74083	0.680075	12.5834	0	55.9864	8.98166	98.7177
14	Kanagawa	19	Synthetic fibers	0	0	0	0	0.0510584	0	0.0226204	0.0606594	8.06197e-05	0.00146769	0.00204241	4.60599e-05	0	0	0	0	0	0	0	0	0	0	0.000212071	0.00186192	0.00017319	0.00587521	0	0	0.0131807	0	0	0	0	0	0	0	0	0	0	0	0	0	0	0	0	0
14	Kanagawa	20	Final chemical products	1496.24	0	19.5493	1.89622	163.739	9.86757	19.1969	44.5834	183.753	227.916	282.814	172.854	204.575	13.2264	30.0629	0	126.22	34.4341	3.63279	1727.69	223.246	0	49.7471	224.651	127.337	78.2413	43.1672	0.487199	109.378	0	0.33565	46.5317	0.670842	1.17214	35.389	56.125	167.253	34.4365	51.6727	28.3712	47.2642	49.4261	21.3627	235.869	10.8716	224.92
14	Kanagawa	21	Medicaments	17.0689	0	0	0	1.74167	0	0	0.102642	0	0	0	0	0	0	0	0	0	0	0	0.526233	115.982	0	0	0	0	0	0	0	0	0	0	0	0	0	0	0	0	0	0	0	0	0	0	0	0	0
14	Kanagawa	22	Petroleum refinery products	996.644	0	41.0492	4.3055	634.473	142.61	43.0927	21.1276	75.1454	19.5383	107.499	45.3352	30.7137	137.612	576.609	0	62.7273	15.5051	2.96947	172.279	148.573	0.217758	360.569	163.221	109.111	537.437	79.492	28.3931	221.834	1.30115	4.95377	95.346	6.09279	232.432	66.2915	32.5017	179.849	45.9733	73.9591	52.3867	11.8116	31.8201	3.95965	90.0322	7.37116	42.6144
14	Kanagawa	23	Coal products	0	0	0.0367512	0	0	0	0	0	0.0174888	0	0.118149	0	0	1.33372	1.70302	0	18.0277	0	0	0.100949	0	0	0	0.0932089	0	0	0	0	3.91331	0.0608668	0.980412	10.4014	0.0178135	2.51075	0.225532	0.343594	0.0682612	0	0.0505073	0.0346376	0	0.0480168	0	0.0166798	0	0.0157586
14	Kanagawa	24	Plastic products	85.4903	0	0.0886825	0.397643	248.265	141.549	0.260922	25.1873	12.0696	73.8741	32.038	146.399	69.5735	6.6083	38.9116	0	0.296796	0	0.37244	90.5768	153.127	0	0	1950.22	132.918	41.9187	0.784058	0.624356	4.84797	0	0	0.290884	0	2.4034	38.4129	2.65315	13.1362	11.8092	18.6878	19.6418	23.3519	57.47	12.6641	631.146	35.2175	657.628
14	Kanagawa	25	Rubber products	14.9688	0	2.04612	1.15931	4.29279	0.326904	0.0337261	10.277	0.649124	3.41578	2.48285	5.10477	1.09264	0.698866	0.65844	0	0.882349	0.370631	0	2.97547	5.74379	0	0.430468	4.64671	164.067	0.0381187	0.906477	0	3.92873	0.0996692	0.856225	2.63192	0.0777855	0.271825	0.57448	4.50108	4.2848	25.3259	66.0542	9.8691	9.30632	16.3195	5.66184	19.5562	6.12785	83.6073
14	Kanagawa	26	Glass and glass products	1.64949	0	0	0	27.3459	196.11	0.160221	3.02374	0.362795	134.002	0	0	0	0	19.3201	0	2.18699	0	0	26.5257	107.211	0	0	83.7879	4.42569	219.117	1.1234	0	7.06696	0	0	0	0	0	13.1584	1.69282	11.5938	2.5468	2.09549	0	3.68425	0.830069	4.72306	271.533	5.15685	24.6813
14	Kanagawa	27	Cement and cement products	0.0172946	0	0	0.0716835	0	0	0	0	0	0	0	0	0	0	0	0	0	0	0	0.0164674	0	0	0.0385947	0	0	0	91.237	0	0.769456	0	0	0	0	0	0	0	0.317353	0	0	0	0	0	0	0.0326509	0	0
14	Kanagawa	28	Pottery, china and earthenware	0	0	0	0	0.24708	0.0525643	0	0	0	1.04716	0	0	0	0	0.196177	0	0	0	0	0.0398698	0	0	0	0.0858967	0	0.00689542	0.0712938	0.558638	0	0	0	0.0068014	0	0	0	0	0.0876192	0.013376	0.0332465	0	0.00623501	1.13153	0.0182891	0.39526	0.0126684	1.30079
14	Kanagawa	29	Other ceramic, stone and clay products	3.73019	0	0	0.0310713	0.127395	0.0112926	0	0	0.0415491	0.229158	0.917266	0.00508671	0.00547899	0.0603541	11.0361	0	0.113306	0.188554	0	0.491082	0.711876	0	0.936816	0.421794	0.120224	11.3651	6.69629	1.08306	14.1057	0.562926	0.0241997	5.80961	0	5.2607	1.13541	0.769652	2.57738	6.68404	1.12565	1.80452	0.0428637	2.21091	0.403389	9.27274	0.16874	4.31615
14	Kanagawa	30	Pig iron and crude steel	0	0	0	0	0	0	0	0	0	0	0	0	0	0	0.1337	0	0	0	0	0	0	0	0	0	0	0	0	0	-0.00355858	3.55521	0.0762511	20.5979	0.253997	0	0	-0.0804868	-0.910743	-0.213859	-0.510976	-0.0529164	-0.0128628	-0.104329	0	-0.642144	0	-0.404455
14	Kanagawa	31	steel products	0.604098	0	0.531572	2.88911	0	0	0	0.112194	1.19581	53.7893	0	0	0	0	0	0	0	0	0	0	0	0	0	14.5032	16.0484	0	54.8776	0	5.23756	0	275.13	272	448.79	1.03681	3.26212	308.171	880.657	200.8	179.315	215.613	6.72571	130.022	8.28109	151.29	26.1921	165.895
14	Kanagawa	32	Cast and forged steel products	0	0	0	0.025968	0	0	0	0	0	0.794107	0	0	0	0	0	0	0	0	0	0	0	0	0	0	0	0	0.0768041	0.440353	0.396433	0	0	8.23076	0	0	0.586413	22.2941	28.0027	57.2552	65.9255	60.2762	2.68677	26.9903	2.6927	10.2668	0.545903	5.78858
14	Kanagawa	33	Other iron or steel products	0	0	0	0	0	0	0	0	0.0348099	32.3033	0	0	0	0	1.16521	0	0.0174867	0	0	0.083721	0	0	0	0.139143	0	0	2.69472	0.0858338	1.46046	0	0	3.65047	0	0	0.673354	67.6885	221.227	24.7566	30.578	6.15318	1.24118	15.7855	0.0307236	29.7469	8.65095	10.2881
14	Kanagawa	34	Non-ferrous metals	0	0	0	0	0	0	0	0	0.0110639	0.312549	0.149489	0	-0.163405	0	50.8277	0	0.344592	0	0	9.81367	0	0	0	0.452078	-0.0101862	5.15804	0	0.982126	4.9624	0.385062	0.530021	1.13302	-0.0338081	132.163	655.893	0.260842	35.9399	-0.267821	0.468636	0.547819	-0.00998722	3.75661	0.205068	243.87	0.111607	3.38959
14	Kanagawa	35	Non-ferrous metal products	0	0	0	0.284805	32.6839	2.21396	0	0	1.20904	17.8457	0	1.42467	2.79008	0	6.25459	0	0	0	0	5.78661	4.02448	0	0	9.96094	5.98304	2.50448	0	0.208686	4.10634	0	0	0.208341	0	3.44278	153.349	81.6821	171.095	63.3919	37.1282	75.6086	3.95625	122.517	21.7157	528.066	24.1152	350.823
14	Kanagawa	36	Metal products for construction and architecture	0.143162	0	0	0.123621	0	0	0	0	0.0944624	1.86795	0	0	0	0	0	0	0	0	0	0	0	0	0	0	0	0	0.46313	0	0	0	0	0.0697617	0	0	0.0507571	17.2595	4.7931	1.12044	0	1.44994	0	0	0	0	0	0.383028
14	Kanagawa	37	Other metal products	21.2417	0	17.2163	11.3485	76.8798	392.357	0	12.2576	42.7031	152.157	6.55657	3.24049	1.07039	0	78.5517	0	34.495	4.35985	0	48.4058	80.7589	0	1.76198	19.1227	174.993	14.8476	36.7393	6.56395	26.4406	0	0	35.0491	0.051353	3.76856	12.7324	105.54	542.337	187.067	161.134	111.986	37.5461	101.326	37.5122	173.393	33.89	625.242
14	Kanagawa	38	General industrial machinery	0.468635	0	2.64561	0.554977	0	0	0	0	0.0662613	1.74705	0	0	0	0	0	0	0	0	0	0	0	0	0.0747003	61.6245	0	102.728	0.0683927	1.11103	5.95715	0	0	9.65647	0.539933	0.550322	1.21053	2.08289	10.8623	1002.74	196.465	36.6801	21.9514	22.9833	11.9305	9.7954	22.0576	15.3445
14	Kanagawa	39	Special industrial machinery	0	0	0	0	0	0	0	0	0	0	0	0	0	0	0	0	0	0	0	0	0	0	0	0	0	1.42073	0	0	0	0	0	0	0	0	0	0	0	11.5489	1194.59	0.0671107	0.183523	0.124044	0.179442	4.45978	0.435034	0
14	Kanagawa	40	Other general machines	0	0	1.06964	0.148029	0	0	0	0	0.16967	14.1395	0	0	0	0	0	0	0	0	0	0.299252	0	0	0	1.90903	0	0.16938	0.0291879	1.283	2.45758	0	0	3.59202	0	0	0.911679	1.25003	3.66994	43.2619	49.1636	134.416	2.47605	36.9308	5.64067	3.69491	3.96767	32.5389
14	Kanagawa	41	Machinery for office and service industry	0	0	0	0	0	0	0	0	0	0	0	0	0	0	0	0	0	0	0	0	0	0	0	0	0	0	0	0	0	0	0	0	0	0	0	0	0	0	0	0	204.959	0	0	0	0	0
14	Kanagawa	42	Industrial electric equipment	0.906211	0	0.0471199	0	0	0	0	0	0.0448459	0.337831	0	0	0	0	0	0	0	0	0	0	0	0	0	0.0398354	0	0	0	0	0	0	0	0	0	0	0.0481937	2.42293	0.306319	59.1853	88.9331	1.82081	14.2495	319.845	28.9341	20.6158	18.7945	210.371
14	Kanagawa	43	Applied electric equipment and electric mesuring instruments	0	0	0	0	0	0	0	0	0	0	0	0	0	0	0	0	0	0	0	0	0	0	0	0	0	0	0	0	0	0	0	0	0	0	0	0	0	7.09588	36.3743	2.19713	3.70211	10.3988	113.341	0	0	3.75608
14	Kanagawa	44	Other electric equipment	3.36281	0	0.0832642	0	1.13389	0	0	0	0	3.05948	0	0	0	0	0.24115	0	0	0	0	1.14356	0.0805443	0	0	0.140784	0	0	0	0	0	0	0	0	0	0	0.170323	0	4.8716	2.37867	11.1379	3.06055	5.36504	26.3267	17.4858	768.271	16.7146	285.41
14	Kanagawa	45	Household electric and electric applications	0	0	0	0	0	0	0	0	0	0	0	0	0	0	0	0	0	0	0	0	0	0	0	0.0148955	0	0	0	0	0	0	0	0	0	0	0	0	0	0	0	0	0	0	0	0	28.4031	0
14	Kanagawa	46	Communication equipment	0.0603974	0	0	0	0	0.227458	0	0.0486071	0	0.0562896	0.0504802	0	0.0551795	0	0.0606359	0	0	0	0	0	1.94424	0	0	0.0530992	0.330215	0.119352	0.0617008	0	0	0	0	0.0588624	0	0.2837	0.0642405	0.117443	0.116661	1.85219	0.575459	0.0591969	0	0	1.10797	0.456101	0.0548192	670.071
14	Kanagawa	47	Electric computing equipment and accessory equipment	0	0	0	0	0	0	0	0	0	0	0	0	0	0	0	0	0	0	0	0	0	0	0	0	0	0	0	0	0	0	0	0	0	0	0	0	0	0	1.84098	0	0	0	0	0	0	0.335877
14	Kanagawa	48	Semiconductor devices and integrated circuits	0	0	0	0	0	0	0	0	0	0	0	0	0	0	0	0	0	0	0	0	0	0	0	0	0	0	0	0	0	0	0	0	0	0	0	0	2.79793	1.30653	13.8556	4.84384	60.4956	78.4169	305.329	11.3142	70.8934	2301.57
14	Kanagawa	49	Other electrical equipment	0	0	0	0	0.0403355	0.012514	0	0	0	0	0	0.0225476	0.655735	0	0	0	0	0	0	0	0.0267415	0	0	0.0116854	0	0	0	0	0	0	0	0	0	0	0.339295	0	2.43896	4.95499	6.77525	0.807696	22.1112	23.3327	123.738	2.84809	22.8974	1024.32
14	Kanagawa	50	Passenger motor cars	0	0	0	0	0	0	0	0	0	0	0	0	0	0	0	0	0	0	0	0	0	0	0	0	0	0	0	0	0	0	0	0	0	0	0	0	0	0	0	0	0	0	0	0	0	0
14	Kanagawa	51	Other cars	0	0	0	0	0	0	0	0	0	0	0	0	0	0	0	0	0	0	0	0	0	0	0	0	0	0	0	0	0	0	0	0	0	0	0	0	0	0	0	0	0	0	0	0	0	0
14	Kanagawa	52	Motor vheicle parts and accessories	0	0	0	0	0	0	0	0	0	0	0	0	0	0	0	0	0	0	0	0	0	0	0	0	0	0	0	0	0	0	0	0	0	0	0	0	0	0	3.038	0	0	0	0	0	0	0
14	Kanagawa	53	Other transportation equipment	78.7774	0	0.0693677	0	0	0	0	0	0	0	0	0	0	0	0	0	0	0	0	0	0	0	0	0	0	0	0	0	0	0	0	0	0	0	0	0	0	0	0	0	0	0	0	0	0	0
14	Kanagawa	54	Precision instruments	1.3114	0	0	0.0377469	0.294791	0	0	0.0293167	0.0360542	0.0339503	0.395803	0.0617958	0	0	0.182858	0	0	0	0	0.0346855	0.21987	0	0	0.64052	0.066388	0	0.037214	0.106682	0.0360157	0	0	0.035502	0	0	0	0.106251	0.0703623	8.02933	28.4606	0.142815	1.62728	4.68551	1.97296	0.103159	0.0661268	82.8104
14	Kanagawa	55	Miscellaneous manufacturing products	7.15302	0	2.70825	0.50373	5.40921	7.29037	0	56.1415	4.50212	24.4331	0.522394	0.353427	0.0951707	0.0698905	0.0348605	0	0.379815	0	0	0.595127	0.0349304	0	0.232466	1.19057	0.158205	5.76386	0.141891	2.88124	4.66897	0	0	8.22334	0	0.0407759	4.35808	0.877759	1.20726	11.8798	0.562429	0.2042	0	0.503243	1.06165	0.819437	0.126066	13.5947
14	Kanagawa	56	Reuse and recycling	0.182542	0	0	0	0.0698683	4.58459	0	0	0	0	3.06375	0	0	1.35547	0.950986	0	0.215859	0	0	0	0	0	0	9.84592	0.067434	2.0181	0.478804	0.18783	0.278032	0.709515	0.00995406	5.56306	0.188998	8.05879	13.5228	0	0.00952945	0	0	0	0	0	0	0.055885	0	0
14	Kanagawa	57	Building construction and repair of construction	0	0	0	0	0	0	0	0	0	0	0	0	0	0	0	0	0	0	0	0	0	0	0	0	0	0	0	0	0	0	0	0	0	0	0	0	0	0	0	0	0	0	0	0	0	0
14	Kanagawa	58	Public construction	0	0	0	0	0	0	0	0	0	0	0	0	0	0	0	0	0	0	0	0	0	0	0	0	0	0	0	0	0	0	0	0	0	0	0	0	0	0	0	0	0	0	0	0	0	0
14	Kanagawa	59	Other civil enginnering and construction	0	0	0	0	0	0	0	0	0	0	0	0	0	0	0	0	0	0	0	0	0	0	0	0	0	0	0	0	0	0	0	0	0	0	0	0	0	0	0	0	0	0	0	0	0	0
14	Kanagawa	60	Electricity	7.41678	0	1.14241	1.84238	14.6003	3.22542	0.491276	1.92406	3.14557	1.65115	15.0224	1.64005	1.71721	1.6264	18.0414	0	5.70503	0.901196	0.510286	4.26866	2.44654	0	0.464087	13.4403	8.22809	7.59799	1.46931	0.362633	5.48711	0.716355	0.406777	17.1826	0.582542	13.9778	7.43958	1.43849	13.1546	3.29526	3.02812	3.29549	1.007	1.87223	0.546389	9.95026	0.556179	5.40261
14	Kanagawa	61	Gas supply and heat supply	0.959476	0	0.332597	0.662812	227.112	124.361	6.98977	3.86088	1.58273	5.66339	23.256	13.5637	0.292195	42.8085	51.6952	0	21.9441	11.7315	0.838084	37.1524	56.3031	0	1.42744	71.1382	44.2979	401.643	3.92073	17.7961	23.7156	1.65253	10.0019	136.212	0.644846	8.63818	116.68	19.279	98.8416	14.712	16.7599	9.71753	2.8574	20.5687	5.58773	225.823	0.580574	73.0188
14	Kanagawa	62	Water supply and waste management services	0.0790183	0	0.0242608	0.0144264	0.557618	0.24409	0.022368	0.0169581	0.0256969	0.0231453	0.386513	0.0414904	0.0199387	0.0639972	0.33281	0	0.191573	0.150182	0.00854546	0.237182	0.294868	0	0.0033588	0.161435	0.0747467	0.108561	0.122239	0.00661179	0.124999	0.00324035	0.0129062	0.0605079	0.00834535	0.129467	0.0952525	0.0278036	0.103569	0.106017	0.143405	0.0490503	0.00907676	0.0398777	0.0151202	0.206721	0.00956271	0.168459
14	Kanagawa	63	Commerce	94.3054	0	2.81558	0.865984	277.069	24.4765	2.04685	40.0658	32.3888	38.5193	65.4684	38.7528	17.0247	4.5042	30.184	0	26.8541	8.31226	0.536933	38.6169	33.7672	0	5.12488	113.987	63.7737	28.8054	14.8102	2.09015	15.5762	0.356872	2.41081	24.347	11.1755	37.9094	32.6396	22.4891	57.7192	41.4749	42.6299	21.5135	12.3538	30.6305	23.6574	93.8908	11.4407	247.774
14	Kanagawa	64	Financial and insurance	0	0	0	0	0	0	0	0	0	0	0	0	0	0	0	0	0	0	0	0	0	0	0	0	0	0	0	0	0	0	0	0	0	0	0	0	0	0	0	0	0	0	0	0	0	0
14	Kanagawa	65	Real estate agencies and rental services	0.0115079	0	0.0126579	0.021556	0.0801433	0.0314624	0.00193465	0.0281405	0.0116089	0.0393946	0.02904	0.028532	0.021634	0.00623616	0.0406589	0	0.0303689	0.0135296	0.00115984	0.0328725	0.0837071	0	0.00321012	0.0766582	0.0330723	0.056415	0.0293907	0.00302454	0.015535	0.00038116	0.0020093	0.0254504	0.00290034	0.0304061	0.0190664	0.0395904	0.0688218	0.0288437	0.0331047	0.0242936	0.00434985	0.0190437	0.014306	0.166496	0.00602599	0.232301
14	Kanagawa	66	House rent	0	0	0	0	0	0	0	0	0	0	0	0	0	0	0	0	0	0	0	0	0	0	0	0	0	0	0	0	0	0	0	0	0	0	0	0	0	0	0	0	0	0	0	0	0	0
14	Kanagawa	67	Transport	304.63	0	67.5056	6.12974	248.989	37.2082	2.09835	21.6081	54.6281	30.3287	48.4774	32.7197	18.2386	6.05893	37.1082	0	20.0209	8.51137	0.733248	33.4584	39.6896	0.015123	7.42012	65.8105	32.5456	34.5509	79.6068	2.30477	33.341	0.632542	2.99044	31.8044	9.05777	133.804	38.812	32.264	68.4051	32.1038	28.8686	20.9421	6.19914	19.366	10.2435	78.424	4.90489	115.982
14	Kanagawa	68	Communication	1.4397	0	0.308943	0.787354	2.3521	0.844486	0.0998873	1.42073	0.39016	1.07555	0.840401	0.83348	0.756829	0.13799	1.46259	0	0.374948	0.184614	0.0199611	1.04989	16.3391	0	0.127493	2.431	3.40988	1.16284	0.606983	0.0725024	0.632627	0	0.0806878	0.940972	0.0460759	2.93179	1.53738	2.41068	2.48842	3.13173	1.95417	1.56787	0.336878	1.19024	0.993153	3.81819	0.337053	7.70379
14	Kanagawa	69	Broadcasting	0	0	0	0	0	0	0	0	0	0	0	0	0	0	0	0	0	0	0	0	0	0	0	0	0	0	0	0	0	0	0	0	0	0	0	0	0	0	0	0	0	0	0	0	0	0
14	Kanagawa	70	Information services	57.5564	0	1.79924	2.74896	126.711	54.1896	0.907497	13.2743	13.3568	40.742	27.668	19.6646	13.91	10.7955	22.1176	0	27.0683	13.8009	0.604502	32.289	199.573	0	1.9305	89.0342	61.2757	40.6858	21.0921	4.72912	31.8168	0.893963	3.60715	26.3044	7.32566	55.5339	52.1402	26.1293	112.399	67.7597	114.184	39.4548	11.6447	82.8517	102.271	263.38	5.33922	462.798
14	Kanagawa	71	﻿Internet based services	0.151776	0	0.0526123	0.078636	1.45854	0.738306	0.0442275	0.773603	0.300439	0.707268	0.274852	0.300384	0.531545	0.0509153	0.634898	0	0.201233	0.0662776	0	0.457636	7.40503	0	0.0282252	2.02378	1.08337	0.624848	0.310104	0.024694	0.250099	0	0.0255189	0.616328	0.0255015	1.60409	0.834075	1.10674	1.53911	1.26059	1.06048	0.495865	0.113001	0.824879	0.685025	2.81765	0.183678	6.20393
14	Kanagawa	72	Image information production and distribution industry	0.0604273	0	0.0282781	0.0260897	0.22209	0.0208606	0.0211302	0.225325	0.0299038	0.120144	0.0867007	0.111905	0.0331241	0.175345	0.146609	0	0.0310456	0.016712	0.0017594	0.107403	0.474143	0	0.0101137	0.2187	0.347815	0.228872	0.125521	0.0235956	0.132432	0.000867293	0.00406398	0.0569285	0.00812241	0.0957963	0.0514179	0.088126	0.422132	0.142844	0.159289	0.0681102	0.0386909	0.119506	0.109093	0.624598	0.0329078	1.2368
14	Kanagawa	73	Public administration	0	0	0	0	0	0	0	0	0	0	0	0	0	0	0	0	0	0	0	0	0	0	0	0	0	0	0	0	0	0	0	0	0	0	0	0	0	0	0	0	0	0	0	0	0	0
14	Kanagawa	74	Education and Research	11.2297	0	1.29003	9.40381	270.846	54.401	1.82642	19.8616	3.16636	37.1177	23.1372	22.9819	1.78946	47.6371	255.634	0	104.526	52.1742	4.56231	320.281	1408.21	0	3.27823	363.571	315.374	330.74	63.0966	15.2327	100.828	1.68673	7.57441	35.9509	0.131639	81.1931	132.846	53.6386	69.5495	132.897	195.516	46.3299	54.1312	282.213	276.957	1267.74	91.3184	1816.27
14	Kanagawa	75	Medical service, health and social security and nursing care	0.0312157	0	0.0168803	0.0187607	0.265243	0.0875814	0.00272887	0.0648149	0.0173015	0.0221104	0.0547893	0.0280656	0.0159706	0.0113094	0.0658119	0	0.0291781	0.0114503	0.0021813	0.0659843	0.259379	0	0.00487626	0.0982484	0.125156	0.0425632	0.0363539	0.00365673	0.0197521	0.000537634	0.00314907	0.0511095	0.0100702	0.0351905	0.0205852	0.0461313	0.128428	0.12684	0.0743549	0.117486	0.0195222	0.0424131	0.0185428	0.116687	0.00793315	0.264471
14	Kanagawa	76	Advertising and survery	0.419292	0	0.290691	0.154169	50.8511	16.4698	0.0709442	1.61827	0.513163	3.18923	5.24915	7.44172	0.296569	0.476419	2.64338	0	0.385558	0.346505	0.0472573	12.9387	28.8089	0	0.0150918	6.00901	6.27747	0.944391	0.681662	0.250869	0.869217	0.0155302	0.113706	0.82606	0.0999931	0.725332	0.853582	1.17476	2.33387	2.5276	2.53445	1.56871	0.866026	1.92758	1.88259	8.95008	0.990294	21.5557
14	Kanagawa	77	Giids rental and leasing services	13.1453	0	1.77686	1.97728	23.554	3.75752	0.69778	3.81412	3.19706	5.78853	4.29466	3.21587	2.97392	0.326338	6.42329	0	1.06656	1.40511	0.0871509	3.15882	3.50037	0	2.39355	20.3177	11.6715	9.91988	13.1487	0.803546	9.18637	0.150363	0.465521	6.49067	0.993273	2.84127	6.8582	4.17125	28.4502	20.9641	20.7952	11.3804	2.61851	20.8769	6.58049	36.1427	2.18474	100.939
14	Kanagawa	78	Other business services	102.582	0	11.1818	10.1066	196.658	28.6624	1.56279	41.0455	23.1577	26.9026	21.1818	24.1271	31.8722	6.95831	68.2531	0	18.9007	7.41613	0.642974	31.5154	69.0246	0	4.6054	127.397	110.771	102.369	54.412	2.0531	36.363	0.362231	1.85648	56.8025	2.19975	52.5131	45.8302	46.0848	80.1809	74.0457	53.9791	26.8749	10.7339	42.6018	35.4127	130.682	12.2171	236.896
14	Kanagawa	79	Personal services	0.431287	0	0.0112127	0	0.338111	0.0862875	0	0.069419	0.053358	0.0452198	0.0675882	0.0365816	0.029552	0.0108511	0.102835	0	0.0268042	0.0235418	0	0.0513323	0.103041	0	0	0.156408	0.108075	0.0585937	0.0495669	0.00526277	0.0106602	0	0	0.0367785	0.0108697	0.139277	0.114683	0.0366905	0.140578	0.0826637	0.0770485	0.0475554	0.0240827	0.0878991	0.0423849	0.29516	0.00978635	0.432714
14	Kanagawa	80	Activities not elsewhere classified	0	0	0	0	0	0	0	0	0	0	0	0	0	0	0	0	0	0	0	0	0	0	0	0	0	0	0	0	0	0	0	0	0	0	0	0	0	0	0	0	0	0	0	0	0	0
15	Niigata	1	Agriculture, forestry and fishery	512.755	0	0.0122007	0.230983	1444.26	37.6113	0.112819	0.254932	161.672	0.0109343	0	0.0199024	0	0.141686	1.07185	0	1.84329	0	0	1.50809	3.74128	0	0.17018	0	100.076	0	0	0	0.208791	0	0	0	0	0	0.0374362	0	0	0	0	0	0	0	0	0	0	0
15	Niigata	2	Metallic ores	0	0	0	0	0	0	0	0	0	0	0	0	0	0	0	0	0	0	0	0	0	0	0	0	0	0	0	0	0	0	0	0	0	0	0	0	0	0	0	0	0	0	0	0	0	0
15	Niigata	3	Non-metallic ores	0.0615644	0	0.149387	0	0	0	0	0	0	0	1.13202	0.00580208	0	1.34242	8.87969	0	0.687014	0	0	0.481985	0.0894566	0	2.96908	0	0.436327	32.6923	21.188	1.57593	15.2846	-0.00589076	0	0.219999	0	0.128525	0.0218273	0.0133014	0.0264256	0	0	0.100568	0	0	0	0	0	0
15	Niigata	4	Coal mining, crude petroleum and natural gas	0	0	0	0	0	0	0	0	0	0	0	0	0	0	0	0	0	0	0	0	0	0	0	0	0	0	0	0	0	0	0	0	0	0	0	0	0	0	0	0	0	0	0	0	0	0
15	Niigata	5	Food and Tobacco	284.744	0	0	0	786.792	64.7595	0	3.17338	0.0593113	0	3.80655	0.0101658	0	0.0844323	0.421138	0	2.4551	0.0209347	0	3.35511	13.829	0	0	0.179128	0	0.367103	0	0.0467997	0.947968	0	0	0.0116806	0	0	0	0	0	0	0	0	0	0	0	0	0	0
15	Niigata	6	Beverage	2.14438	0	0	0	3.46828	5.32468	0	0	0	0	0	0	0	0	0	0	0.0234324	0	0	0	0.106673	0	0	0	0	0	0	0	0	0	0	0	0	0	0	0	0	0	0	0	0	0	0	0	0	0
15	Niigata	7	Textile products	9.53754	0	0	0	1.11711	0.0236306	17.3775	444.827	0.422304	11.5555	7.25825	33.3594	0.458609	0.732515	0	0	0	0	0.19731	0.0477966	0	0	0	3.0451	48.12	0.843167	0.0256405	0	1.68741	0	0	0.0489218	0	0	1.46827	0.122012	1.50287	0.216478	0.454363	0.0245999	0	0	0	20.3043	3.75882	9.89366
15	Niigata	8	Wearing aparel and other textile products	11.499	0	0.871046	0.260378	6.59668	0.698477	0.177827	9.87061	1.30273	1.55011	1.48014	1.14687	0.153047	0.67436	0.52857	0	0.440247	0.0731525	0	0.865897	1.51667	0	0.934591	0.704827	1.46107	3.35767	0.708988	0.280342	1.56161	0	0.0241422	1.09619	0.120629	0.252925	1.32362	0.523516	2.46147	1.29579	0.832257	1.46598	0.181738	1.61495	0.815315	1.80722	0.553889	6.68028
15	Niigata	9	Timber and wooden products	2.696	0	0.0458864	0.0320055	1.48186	0.286649	0	0.102981	34.3654	30.5465	0.00737585	0.834603	0.00806247	0.00444063	0	0	0.00438769	0.00770729	0	0.096632	0	0	0	0.318099	0.0120622	1.13353	0.0631073	0.628883	0.719817	0	0	0.72245	0	0	1.5206	0.2145	1.05257	0.0845721	0.113511	0.0432474	0.106439	0.111911	0.0385453	0.454003	0.0360442	0.971981
15	Niigata	10	Furniture and fixtures	0.189112	0	0.30155	0.313535	5.31807	0.261139	0.0330642	1.06537	0.174694	29.5982	0.537404	0.588147	0.184292	0.088816	0.898664	0	0.288345	0.143141	0	1.02038	2.06727	0	0.0140674	2.75992	0.953525	0.137026	0.309109	0.332299	0.598312	0	0.0508741	1.06897	0	0.0592201	0.563206	0.134834	0.706207	0.519534	0.432441	0.345992	0.0901106	0.468216	0.572695	3.36796	0.389064	39.4879
15	Niigata	11	Pulp, paper, paperboard, building paper	1.81633	0	0	0	41.4132	0.273613	0.0952698	1.37405	8.01774	22.311	879.49	542.538	159.934	0	14.8433	0	0	7.10666	0	30.6113	6.43159	0	0	26.9548	9.79812	36.9336	0	2.9788	18.1374	0	0	0	0.183108	0	3.94108	0.141274	1.36825	0.800701	0.0346115	3.1332	0	22.145	0.444268	29.8673	1.6156	31.328
15	Niigata	12	Paper products	22.5831	0	0	0	35.7226	12.0129	0.073318	1.46243	0.0830088	3.2725	0.373855	5.41592	0.255411	0.568325	1.5156	0	0.339153	0.0927804	0.0439547	6.55896	12.1266	0	0.00623871	3.146	0.331169	9.74519	0.0514074	1.58833	1.1443	0	0	0	0.13528	0	0.446028	0.00543612	2.66756	0.551906	0.0958912	0.515132	0.209806	0.698915	0.346785	4.07456	0.781529	7.56944
15	Niigata	13	Publishing, printing	0.0611771	0	0.0165965	0.0248057	12.167	0.648609	0.0441799	1.06604	0.0947734	0.919697	0.0889251	3.02317	5.65723	0.0535374	0.384534	0	0.0396743	0.0534296	0.0162634	2.63143	0.944533	0	0.00890364	0.219816	0.247223	1.44546	0.0570628	0.0337554	0.157787	0.00229058	0.0107332	0.417356	0.00268148	0.109323	0.220672	0.0749961	0.860563	0.364515	0.544874	0.289378	0.584594	0.190337	0.281151	0.861209	0.535955	11.2108
15	Niigata	14	Chemical fertilizer	200.325	0	0	0	0.0509083	0.16584	0	0.0202512	0	0	0	0.0213434	0	71.5659	16.8755	0	8.70771	1.34057	0	5.34303	2.20226	0	0	0	0.0687885	0.497256	0	0	0.223908	0	0.05077	0	0	0.768286	0.0267645	0	0	0	0.0239753	0	0	0	0	1.75773	0	0
15	Niigata	15	Basic inorganic chemical products	1.4215	0	0.0202502	0	21.0371	4.19838	2.48534	3.7141	0.0192729	0.362964	8.18643	1.22223	0.0177903	25.3781	262.061	0	53.7526	5.37407	0.102054	89.7394	49.383	0	0.0869098	17.8557	136.522	51.9673	0.397857	1.93893	1.80972	0.402456	0.196441	1.40435	0.078523	5.14503	1.90547	3.93792	3.51676	0.85842	0.760684	1.83221	0.139178	1.39343	1.08867	58.857	0.247438	18.113
15	Niigata	16	Basic organic chemical products	0	0	0	0	0.407076	0	0	0	0	0	0.18111	0.0262565	0.19797	7.57031	47.5183	0	139.474	19.0871	0.162235	21.6642	1.33903	0	0	0.0816455	0.648778	1.98809	0	0	0.244845	0	0	0	0	0	0	0	0	0.118664	0	0	0	0	0	0	0	0
15	Niigata	17	Organic chemical products	0.0719565	0	0.014966	0	17.8477	2.39826	1.72358	0.0231639	0.811891	1.26078	11.6313	7.83666	0.249812	1.18763	82.3688	0	141.202	175.975	9.44046	127.438	84.5317	0	0.192693	79.2161	326.126	6.10013	0.0882113	0.0702438	21.5989	0	0	0	0	1.50408	3.75022	0.055968	0.486458	0.0689586	0.0685593	0.451368	0.347154	0.730001	0.188575	15.541	1.35846	4.58195
15	Niigata	18	Synthetic resins	0	0	0	0	0	0	0.00922417	0	0.0417734	2.08479	7.44326	2.04056	0.20244	0	0	0	0	0.119799	1.00461	20.4756	0	0	0	333.984	0.182683	15.2109	0	0	1.63786	0	0	0	0	0	4.57898	0.0102588	0.387238	0	0	0.289572	0.113125	2.09313	0	9.31284	1.49402	16.4208
15	Niigata	19	Synthetic fibers	0	0	0	0	2.33986	0	1.03663	2.77985	0.00369457	0.0672601	0.0935978	0.00211079	0	0	0	0	0	0	0	0	0	0	0.00971859	0.0853265	0.00793678	0.269244	0	0	0.604033	0	0	0	0	0	0	0	0	0	0	0	0	0	0	0	0	0
15	Niigata	20	Final chemical products	63.7794	0	0.833319	0.0808292	6.97962	0.420621	0.818298	1.90044	7.83277	9.71528	12.0554	7.36818	8.72032	0.563795	1.28148	0	5.38033	1.46781	0.154854	73.6458	9.51623	0	2.12055	9.5761	5.42793	3.33516	1.84007	0.0207677	4.66239	0	0.0143076	1.98349	0.0285957	0.0499644	1.50851	2.39242	7.12945	1.46791	2.20263	1.20937	2.01471	2.10687	0.910621	10.0543	0.46342	9.58759
15	Niigata	21	Medicaments	0.435958	0	0	0	0.0444841	0	0	0.00262157	0	0	0	0	0	0	0	0	0	0	0	0.0134405	2.96231	0	0	0	0	0	0	0	0	0	0	0	0	0	0	0	0	0	0	0	0	0	0	0	0	0
15	Niigata	22	Petroleum refinery products	6.6554	0	0.274118	0.0287513	4.23689	0.952322	0.287765	0.141086	0.501806	0.130473	0.717856	0.30274	0.2051	0.918949	3.85048	0	0.41888	0.10354	0.0198295	1.15045	0.992145	0.00145415	2.40781	1.08996	0.728623	3.5889	0.530832	0.189603	1.48137	0.00868882	0.0330803	0.636702	0.0406865	1.55214	0.442682	0.21704	1.20099	0.307	0.493884	0.349828	0.0788757	0.212489	0.0264418	0.601218	0.0492232	0.28457
15	Niigata	23	Coal products	0	0	0.00857104	0	0	0	0	0	0.0040787	0	0.0275544	0	0	0.311047	0.397175	0	4.20439	0	0	0.0235431	0	0	0	0.021738	0	0	0	0	0.912653	0.0141952	0.22865	2.4258	0.00415443	0.585552	0.0525982	0.0801324	0.0159197	0	0.0117792	0.00807811	0	0.0111984	0	0.00389002	0	0.0036752
15	Niigata	24	Plastic products	33.6043	0	0.034859	0.156304	97.587	55.6397	0.102562	9.90052	4.74427	29.0382	12.5934	57.5462	27.3477	2.59757	15.2952	0	0.116664	0	0.146397	35.6036	60.1908	0	0	766.588	52.2469	16.4773	0.308195	0.24542	1.90563	0	0	0.11434	0	0.94472	15.0992	1.04289	5.16355	4.64191	7.34573	7.72075	9.17908	22.5901	4.97796	248.089	13.8432	258.498
15	Niigata	25	Rubber products	2.66391	0	0.364136	0.206316	0.763962	0.0581773	0.00600203	1.82893	0.115521	0.607886	0.441857	0.908467	0.194451	0.124373	0.117179	0	0.157026	0.065959	0	0.529527	1.02219	0	0.0766079	0.826948	29.198	0.00678375	0.16132	0	0.699173	0.0177375	0.152377	0.468388	0.013843	0.048375	0.102237	0.80103	0.762541	4.5071	11.7553	1.75635	1.65619	2.90429	1.0076	3.48029	1.09054	14.8791
15	Niigata	26	Glass and glass products	0.0284004	0	0	0	0.470831	3.37655	0.00275862	0.0520616	0.00624647	2.3072	0	0	0	0	0.332646	0	0.0376547	0	0	0.456709	1.84592	0	0	1.44263	0.0761999	3.77267	0.0193422	0	0.121676	0	0	0	0	0	0.226556	0.0291464	0.199618	0.0438498	0.0360794	0	0.0634341	0.0142918	0.0813198	4.67516	0.0887887	0.424953
15	Niigata	27	Cement and cement products	0.013405	0	0	0.0555615	0	0	0	0	0	0	0	0	0	0	0	0	0	0	0	0.0127638	0	0	0.0299145	0	0	0	70.7172	0	0.5964	0	0	0	0	0	0	0	0.245978	0	0	0	0	0	0	0.0253075	0	0
15	Niigata	28	Pottery, china and earthenware	0	0	0	0	0.241502	0.0513775	0	0	0	1.02352	0	0	0	0	0.191748	0	0	0	0	0.0389697	0	0	0	0.0839573	0	0.00673973	0.0696841	0.546026	0	0	0	0.00664784	0	0	0	0	0.0856409	0.013074	0.0324958	0	0.00609423	1.10599	0.0178762	0.386336	0.0123824	1.27142
15	Niigata	29	Other ceramic, stone and clay products	3.88905	0	0	0.0323945	0.13282	0.0117735	0	0	0.0433186	0.238917	0.95633	0.00530334	0.00571233	0.0629245	11.5061	0	0.118131	0.196584	0	0.511996	0.742193	0	0.976713	0.439757	0.125344	11.8491	6.98147	1.12918	14.7064	0.5869	0.0252303	6.05703	0	5.48474	1.18376	0.80243	2.68714	6.9687	1.17359	1.88137	0.0446891	2.30507	0.420569	9.66765	0.175926	4.49997
15	Niigata	30	Pig iron and crude steel	0	0	0	0	0	0	0	0	0	0	0	0	0	0	0.41536	0	0	0	0	0	0	0	0	0	0	0	0	0	-0.0110553	11.0448	0.236886	63.9907	0.789083	0	0	-0.250045	-2.82937	-0.664387	-1.58743	-0.164393	-0.0399604	-0.324113	0	-1.99492	0	-1.2565
15	Niigata	31	steel products	0.0731883	0	0.0644015	0.350024	0	0	0	0.0135926	0.144875	6.51673	0	0	0	0	0	0	0	0	0	0	0	0	0	1.7571	1.9443	0	6.64858	0	0.634545	0	33.3328	32.9536	54.3722	0.125613	0.395215	37.3358	106.694	24.3275	21.7245	26.1221	0.814839	15.7526	1.00328	18.3293	3.17325	20.0986
15	Niigata	32	Cast and forged steel products	0	0	0	0.0310867	0	0	0	0	0	0.950641	0	0	0	0	0	0	0	0	0	0	0	0	0	0	0	0	0.0919437	0.527155	0.474577	0	0	9.85319	0	0	0.702006	26.6887	33.5226	68.5413	78.9206	72.1578	3.21638	32.3106	3.22348	12.2905	0.653511	6.92962
15	Niigata	33	Other iron or steel products	0	0	0	0	0	0	0	0	0.014067	13.054	0	0	0	0	0.470872	0	0.0070665	0	0	0.0338323	0	0	0	0.0562289	0	0	1.08896	0.0346861	0.590182	0	0	1.47519	0	0	0.272108	27.3535	89.3996	10.0043	12.3568	2.48655	0.501572	6.37906	0.0124157	12.021	3.49592	4.15751
15	Niigata	34	Non-ferrous metals	0	0	0	0	0	0	0	0	0.00570956	0.161291	0.0771442	0	-0.0843256	0	26.2297	0	0.177827	0	0	5.06437	0	0	0	0.233296	-0.00525662	2.66182	0	0.506828	2.56086	0.198712	0.273519	0.5847	-0.0174467	68.2032	338.475	0.134608	18.5469	-0.13821	0.241841	0.282703	-0.00515393	1.93861	0.105826	125.85	0.0575953	1.74921
15	Niigata	35	Non-ferrous metal products	0	0	0	0.0497398	5.70809	0.386658	0	0	0.211153	3.11667	0	0.248813	0.487274	0	1.09233	0	0	0	0	1.0106	0.702856	0	0	1.73963	1.04491	0.437395	0	0.036446	0.717153	0	0	0.0363858	0	0.601266	26.7817	14.2654	29.8809	11.0711	6.48427	13.2047	0.69094	21.3971	3.79255	92.2243	4.2116	61.2697
15	Niigata	36	Metal products for construction and architecture	0.128099	0	0	0.110615	0	0	0	0	0.0845237	1.67142	0	0	0	0	0	0	0	0	0	0	0	0	0	0	0	0	0.414402	0	0	0	0	0.0624218	0	0	0.0454168	15.4436	4.2888	1.00256	0	1.29738	0	0	0	0	0	0.342728
15	Niigata	37	Other metal products	18.1739	0	14.7299	9.70953	65.7766	335.692	0	10.4873	36.5358	130.182	5.60965	2.77249	0.915797	0	67.2071	0	29.5132	3.73019	0	41.4149	69.0954	0	1.50751	16.361	149.72	12.7033	31.4333	5.61596	22.622	0	0	29.9872	0.0439365	3.22429	10.8936	90.2973	464.011	160.05	137.863	95.8126	32.1236	86.6922	32.0946	148.351	28.9955	534.943
15	Niigata	38	General industrial machinery	0.107103	0	0.604635	0.126836	0	0	0	0	0.0151436	0.399276	0	0	0	0	0	0	0	0	0	0	0	0	0.0170722	14.0838	0	23.4778	0.0156307	0.253917	1.36147	0	0	2.20692	0.123398	0.125772	0.276659	0.47603	2.48251	229.168	44.9006	8.38297	5.01683	5.25266	2.72664	2.23867	5.04111	3.50687
15	Niigata	39	Special industrial machinery	0	0	0	0	0	0	0	0	0	0	0	0	0	0	0	0	0	0	0	0	0	0	0	0	0	0.345764	0	0	0	0	0	0	0	0	0	0	0	2.81067	290.728	0.0163328	0.0446641	0.0301887	0.043671	1.08538	0.105874	0
15	Niigata	40	Other general machines	0	0	0.856739	0.118566	0	0	0	0	0.135899	11.3252	0	0	0	0	0	0	0	0	0	0.239689	0	0	0	1.52906	0	0.135667	0.0233784	1.02763	1.96843	0	0	2.87707	0	0	0.730219	1.00123	2.93947	34.6511	39.3782	107.662	1.98322	29.5802	4.51796	2.95948	3.17795	26.0624
15	Niigata	41	Machinery for office and service industry	0	0	0	0	0	0	0	0	0	0	0	0	0	0	0	0	0	0	0	0	0	0	0	0	0	0	0	0	0	0	0	0	0	0	0	0	0	0	0	0	17.3479	0	0	0	0	0
15	Niigata	42	Industrial electric equipment	0.209349	0	0.0108855	0	0	0	0	0	0.0103601	0.0780444	0	0	0	0	0	0	0	0	0	0	0	0	0	0.00920261	0	0	0	0	0	0	0	0	0	0	0.0111335	0.559737	0.0707647	13.6728	20.545	0.420636	3.29187	73.8894	6.68423	4.76258	4.34182	48.5991
15	Niigata	43	Applied electric equipment and electric mesuring instruments	0	0	0	0	0	0	0	0	0	0	0	0	0	0	0	0	0	0	0	0	0	0	0	0	0	0	0	0	0	0	0	0	0	0	0	0	0	0.0815958	0.418269	0.0252649	0.0425707	0.119576	1.30331	0	0	0.0431913
15	Niigata	44	Other electric equipment	0.918888	0	0.0227519	0	0.309836	0	0	0	0	0.836002	0	0	0	0	0.0658941	0	0	0	0	0.312478	0.0220087	0	0	0.0384692	0	0	0	0	0	0	0	0	0	0	0.0465408	0	1.33116	0.64997	3.04343	0.836294	1.466	7.19375	4.778	209.93	4.56726	77.9883
15	Niigata	45	Household electric and electric applications	0	0	0	0	0	0	0	0	0	0	0	0	0	0	0	0	0	0	0	0	0	0	0	0.0243096	0	0	0	0	0	0	0	0	0	0	0	0	0	0	0	0	0	0	0	0	46.3542	0
15	Niigata	46	Communication equipment	0.00131794	0	0	0	0	0.00496337	0	0.00106066	0	0.0012283	0.00110153	0	0.00120408	0	0.00132314	0	0	0	0	0	0.0424254	0	0	0.00115868	0.00720564	0.00260439	0.00134638	0	0	0	0	0.00128444	0	0.00619065	0.0014018	0.00256274	0.00254567	0.0404169	0.0125571	0.00129174	0	0	0.0241772	0.00995263	0.00119621	14.6217
15	Niigata	47	Electric computing equipment and accessory equipment	0	0	0	0	0	0	0	0	0	0	0	0	0	0	0	0	0	0	0	0	0	0	0	0	0	0	0	0	0	0	0	0	0	0	0	0	0	0	1.49417	0	0	0	0	0	0	0.272604
15	Niigata	48	Semiconductor devices and integrated circuits	0	0	0	0	0	0	0	0	0	0	0	0	0	0	0	0	0	0	0	0	0	0	0	0	0	0	0	0	0	0	0	0	0	0	0	0	1.09163	0.509752	5.40587	1.88986	23.6028	30.595	119.127	4.41433	27.6596	897.974
15	Niigata	49	Other electrical equipment	0	0	0	0	0.0527329	0.0163603	0	0	0	0	0	0.0294778	0.85728	0	0	0	0	0	0	0	0.0349608	0	0	0.015277	0	0	0	0	0	0	0	0	0	0	0.44358	0	3.1886	6.47795	8.85768	1.05595	28.9073	30.5041	161.77	3.72348	29.9351	1339.15
15	Niigata	50	Passenger motor cars	0	0	0	0	0	0	0	0	0	0	0	0	0	0	0	0	0	0	0	0	0	0	0	0	0	0	0	0	0	0	0	0	0	0	0	0	0	0	0	0	0	0	0	0	0	0
15	Niigata	51	Other cars	0	0	0	0	0	0	0	0	0	0	0	0	0	0	0	0	0	0	0	0	0	0	0	0	0	0	0	0	0	0	0	0	0	0	0	0	0	0	0	0	0	0	0	0	0	0
15	Niigata	52	Motor vheicle parts and accessories	0	0	0	0	0	0	0	0	0	0	0	0	0	0	0	0	0	0	0	0	0	0	0	0	0	0	0	0	0	0	0	0	0	0	0	0	0	0	0.127933	0	0	0	0	0	0	0
15	Niigata	53	Other transportation equipment	10.0655	0	0.00886316	0	0	0	0	0	0	0	0	0	0	0	0	0	0	0	0	0	0	0	0	0	0	0	0	0	0	0	0	0	0	0	0	0	0	0	0	0	0	0	0	0	0	0
15	Niigata	54	Precision instruments	0.763107	0	0	0.021965	0.171539	0	0	0.0170594	0.02098	0.0197557	0.230319	0.0359591	0	0	0.106406	0	0	0	0	0.0201835	0.127943	0	0	0.37272	0.0386313	0	0.0216549	0.0620787	0.0209576	0	0	0.0206587	0	0	0	0.0618278	0.040944	4.67228	16.5613	0.0831044	0.946916	2.72651	1.14807	0.0600285	0.0384793	48.1876
15	Niigata	55	Miscellaneous manufacturing products	1.1332	0	0.429049	0.0798026	0.856945	1.15496	0	8.89412	0.713239	3.87078	0.0827593	0.055991	0.0150772	0.0110723	0.00552272	0	0.0601714	0	0	0.0942818	0.00553379	0	0.036828	0.188615	0.0250633	0.913129	0.0224788	0.456455	0.739672	0	0	1.30277	0	0.00645985	0.690421	0.139057	0.191258	1.88203	0.0891018	0.0323499	0	0.0797254	0.168191	0.129818	0.0199717	2.15371
15	Niigata	56	Reuse and recycling	0	0	0	0	0	0	0	0	0	0	0	0	0	0	0	0	0	0	0	0	0	0	0	0	0	0	0	0	0	0	0	0	0	0	0	0	0	0	0	0	0	0	0	0	0	0
15	Niigata	57	Building construction and repair of construction	0	0	0	0	0	0	0	0	0	0	0	0	0	0	0	0	0	0	0	0	0	0	0	0	0	0	0	0	0	0	0	0	0	0	0	0	0	0	0	0	0	0	0	0	0	0
15	Niigata	58	Public construction	0	0	0	0	0	0	0	0	0	0	0	0	0	0	0	0	0	0	0	0	0	0	0	0	0	0	0	0	0	0	0	0	0	0	0	0	0	0	0	0	0	0	0	0	0	0
15	Niigata	59	Other civil enginnering and construction	0	0	0	0	0	0	0	0	0	0	0	0	0	0	0	0	0	0	0	0	0	0	0	0	0	0	0	0	0	0	0	0	0	0	0	0	0	0	0	0	0	0	0	0	0	0
15	Niigata	60	Electricity	40.6515	0	6.2616	10.0981	80.0248	17.6786	2.6927	10.5458	17.241	9.05	82.3381	8.98913	9.41208	8.91432	98.8855	0	31.2694	4.93947	2.79689	23.3966	13.4096	0	2.54367	73.6665	45.0984	41.6448	8.05333	1.9876	30.075	3.92636	2.22955	94.1785	3.19293	76.6128	40.7765	7.88442	72.1006	18.0614	16.5972	18.0627	5.51939	10.2617	2.99477	54.5376	3.04843	29.6118
15	Niigata	61	Gas supply and heat supply	0	0	0	0	0	0	0	0	0	0	0	0	0	0	0	0	0	0	0	0	0	0	0	0	0	0	0	0	0	0	0	0	0	0	0	0	0	0	0	0	0	0	0	0	0	0
15	Niigata	62	Water supply and waste management services	0.0198359	0	0.00609016	0.00362144	0.139978	0.0612736	0.00561501	0.00425698	0.00645066	0.00581013	0.0970258	0.0104153	0.00500518	0.0160651	0.0835449	0	0.0480904	0.0377	0.00214515	0.0595394	0.0740203	0	0.000843155	0.0405248	0.0187636	0.0272519	0.0306854	0.00165975	0.0313784	0.000813422	0.00323982	0.0151892	0.00209492	0.0324998	0.0239111	0.00697951	0.0259988	0.0266132	0.0359988	0.012313	0.00227853	0.0100104	0.00379562	0.0518929	0.00240051	0.0422881
15	Niigata	63	Commerce	76.3812	0	2.28044	0.70139	224.408	19.8243	1.65782	32.4507	26.2328	31.1981	53.0251	31.3872	13.7889	3.64811	24.4471	0	21.75	6.73239	0.434881	31.2772	27.3492	0	4.15082	92.3224	51.6525	23.3305	11.9953	1.69288	12.6157	0.289043	1.9526	19.7195	9.05138	30.7042	26.4359	18.2147	46.7488	33.592	34.5274	17.4246	10.0057	24.8087	19.1609	76.0454	9.26625	200.68
15	Niigata	64	Financial and insurance	0	0	0	0	0	0	0	0	0	0	0	0	0	0	0	0	0	0	0	0	0	0	0	0	0	0	0	0	0	0	0	0	0	0	0	0	0	0	0	0	0	0	0	0	0	0
15	Niigata	65	Real estate agencies and rental services	0.000219223	0	0.000241129	0.000410637	0.00152671	0.000599352	3.68547e-05	0.00053607	0.000221147	0.000750457	0.000553204	0.000543529	0.000412122	0.000118797	0.000774543	0	0.00057852	0.000257735	2.20947e-05	0.000626212	0.0015946	0	6.11521e-05	0.00146032	0.000630019	0.00107469	0.000559885	5.76168e-05	0.000295938	7.261e-06	3.82767e-05	0.000484824	5.52509e-05	0.000579229	0.000363211	0.000754189	0.00131104	0.000549465	0.000630636	0.000462788	8.28636e-05	0.000362779	0.000272525	0.00317172	0.000114794	0.00442528
15	Niigata	66	House rent	0	0	0	0	0	0	0	0	0	0	0	0	0	0	0	0	0	0	0	0	0	0	0	0	0	0	0	0	0	0	0	0	0	0	0	0	0	0	0	0	0	0	0	0	0	0
15	Niigata	67	Transport	72.0726	0	15.9712	1.45024	58.9084	8.80311	0.49645	5.11228	12.9245	7.17549	11.4693	7.74116	4.31508	1.43349	8.77945	0	4.73674	2.01371	0.173479	7.91593	9.39018	0.00357797	1.75553	15.5701	7.69997	8.17442	18.8342	0.545287	7.88817	0.149653	0.70751	7.52462	2.14298	31.6567	9.18254	7.63334	16.184	7.59546	6.83004	4.9547	1.46666	4.58182	2.42351	18.5544	1.16045	27.4403
15	Niigata	68	Communication	0.00927459	0	0.00199023	0.00507217	0.0151523	0.00544022	0.000643479	0.00915239	0.00251343	0.00692876	0.0054139	0.00536932	0.00487553	0.000888938	0.00942207	0	0.00241543	0.00118929	0.00012859	0.00676342	0.105257	0	0.000821315	0.0156606	0.0219666	0.00749106	0.00391022	0.000467064	0.00407541	0	0.000519795	0.00606179	0.000296823	0.0188868	0.00990389	0.0155297	0.0160305	0.0201748	0.0125888	0.0101003	0.00217018	0.00766757	0.00639794	0.0245969	0.00217131	0.0496282
15	Niigata	69	Broadcasting	0	0	0	0	0	0	0	0	0	0	0	0	0	0	0	0	0	0	0	0	0	0	0	0	0	0	0	0	0	0	0	0	0	0	0	0	0	0	0	0	0	0	0	0	0	0
15	Niigata	70	Information services	0	0	0	0	0	0	0	0	0	0	0	0	0	0	0	0	0	0	0	0	0	0	0	0	0	0	0	0	0	0	0	0	0	0	0	0	0	0	0	0	0	0	0	0	0	0
15	Niigata	71	﻿Internet based services	0	0	0	0	0	0	0	0	0	0	0	0	0	0	0	0	0	0	0	0	0	0	0	0	0	0	0	0	0	0	0	0	0	0	0	0	0	0	0	0	0	0	0	0	0	0
15	Niigata	72	Image information production and distribution industry	0	0	0	0	0	0	0	0	0	0	0	0	0	0	0	0	0	0	0	0	0	0	0	0	0	0	0	0	0	0	0	0	0	0	0	0	0	0	0	0	0	0	0	0	0	0
15	Niigata	73	Public administration	0	0	0	0	0	0	0	0	0	0	0	0	0	0	0	0	0	0	0	0	0	0	0	0	0	0	0	0	0	0	0	0	0	0	0	0	0	0	0	0	0	0	0	0	0	0
15	Niigata	74	Education and Research	0.0771491	0	0.00886259	0.0646048	1.86073	0.373739	0.0125476	0.136451	0.0217531	0.255001	0.158954	0.157887	0.0122937	0.32727	1.75622	0	0.7181	0.35844	0.0313434	2.20035	9.6745	0	0.0225217	2.49776	2.16664	2.27221	0.433477	0.10465	0.692696	0.011588	0.0520367	0.246985	0.000904369	0.557802	0.912658	0.368501	0.47781	0.913009	1.34321	0.318289	0.371885	1.93882	1.90271	8.70944	0.627364	12.4779
15	Niigata	75	Medical service, health and social security and nursing care	0.000340853	0	0.000184321	0.000204853	0.00289626	0.000956325	2.97973e-05	0.000707731	0.00018892	0.00024143	0.000598259	0.000306456	0.000174387	0.000123491	0.000718618	0	0.000318604	0.000125029	2.38183e-05	0.0007205	0.00283223	0	5.32452e-05	0.0010728	0.00136662	0.000464759	0.000396958	3.99288e-05	0.000215678	5.87058e-06	3.43856e-05	0.000558079	0.000109959	0.000384255	0.000224776	0.000503721	0.00140234	0.001385	0.000811902	0.00128286	0.000213169	0.00046312	0.000202473	0.00127413	8.66242e-05	0.00288784
15	Niigata	76	Advertising and survery	0	0	0	0	0	0	0	0	0	0	0	0	0	0	0	0	0	0	0	0	0	0	0	0	0	0	0	0	0	0	0	0	0	0	0	0	0	0	0	0	0	0	0	0	0	0
15	Niigata	77	Giids rental and leasing services	1.04836	0	0.141709	0.157692	1.87848	0.299671	0.0556495	0.304185	0.254973	0.461648	0.342509	0.256473	0.237177	0.0260262	0.512272	0	0.0850603	0.112061	0.00695049	0.251923	0.279163	0	0.190891	1.62038	0.930827	0.791133	1.04864	0.0640847	0.732635	0.0119918	0.0371264	0.517646	0.0792159	0.226598	0.546957	0.332667	2.26897	1.67194	1.65847	0.907617	0.208832	1.66498	0.524809	2.88246	0.174238	8.05009
15	Niigata	78	Other business services	0.58558	0	0.0638303	0.0576927	1.12261	0.163618	0.00892108	0.234306	0.132194	0.153572	0.120915	0.137728	0.181941	0.039721	0.389618	0	0.107893	0.0423345	0.00367037	0.179903	0.394022	0	0.0262896	0.72724	0.63233	0.584369	0.310607	0.01172	0.207575	0.00206777	0.0105976	0.324253	0.0125571	0.299768	0.261619	0.263072	0.457708	0.422685	0.308136	0.153414	0.0612736	0.243189	0.202151	0.74599	0.0697402	1.3523
15	Niigata	79	Personal services	0.162597	0	0.00422724	0	0.127469	0.0325307	0	0.0261712	0.0201162	0.0170481	0.025481	0.0137914	0.0111412	0.00409089	0.0387693	0	0.0101053	0.00887534	0	0.0193525	0.038847	0	0	0.0589665	0.0407448	0.0220901	0.0186869	0.00198409	0.00401894	0	0	0.0138656	0.00409794	0.0525081	0.0432358	0.0138325	0.0529984	0.0311645	0.0290476	0.0179286	0.00907926	0.0331383	0.0159793	0.111277	0.00368949	0.163135
15	Niigata	80	Activities not elsewhere classified	0	0	0	0	0	0	0	0	0	0	0	0	0	0	0	0	0	0	0	0	0	0	0	0	0	0	0	0	0	0	0	0	0	0	0	0	0	0	0	0	0	0	0	0	0	0
16	Toyama	1	Agriculture, forestry and fishery	135.763	0	0.00323038	0.0611576	382.399	9.95838	0.0298711	0.0674986	42.806	0.00289507	0	0.00526957	0	0.0375143	0.283793	0	0.488049	0	0	0.399298	0.99058	0	0.0450586	0	26.4971	0	0	0	0.0552817	0	0	0	0	0	0.009912	0	0	0	0	0	0	0	0	0	0	0
16	Toyama	2	Metallic ores	0	0	0	0	0	0	0	0	0	0	0	0	0	0	0	0	0	0	0	0	0	0	0	0	0	0	0	0	0	0	0	0	0	0	0	0	0	0	0	0	0	0	0	0	0	0
16	Toyama	3	Non-metallic ores	0.0029015	0	0.00704051	0	0	0	0	0	0	0	0.0533517	0.000273449	0	0.0632675	0.418495	0	0.0323786	0	0	0.0227157	0.00421604	0	0.139931	0	0.0205639	1.54077	0.998579	0.0742729	0.720357	-0.000277629	0	0.0103684	0	0.00605734	0.00102871	0.000626887	0.00124542	0	0	0.00473972	0	0	0	0	0	0
16	Toyama	4	Coal mining, crude petroleum and natural gas	0	0	0	0	0	0	0	0	0	0	0	0	0	0	0	0	0	0	0	0	0	0	0	0	0	0	0	0	0	0	0	0	0	0	0	0	0	0	0	0	0	0	0	0	0	0
16	Toyama	5	Food and Tobacco	44.4177	0	0	0	122.733	10.1019	0	0.495022	0.00925208	0	0.59379	0.00158578	0	0.0131707	0.0656941	0	0.382975	0.00326565	0	0.523369	2.1572	0	0	0.0279425	0	0.0572651	0	0.00730037	0.147875	0	0	0.00182207	0	0	0	0	0	0	0	0	0	0	0	0	0	0
16	Toyama	6	Beverage	1.93351	0	0	0	3.12723	4.80109	0	0	0	0	0	0	0	0	0	0	0.0211282	0	0	0	0.0961833	0	0	0	0	0	0	0	0	0	0	0	0	0	0	0	0	0	0	0	0	0	0	0	0	0
16	Toyama	7	Textile products	6.52634	0	0	0	0.764416	0.01617	11.8911	304.386	0.288974	7.90721	4.96667	22.8271	0.313817	0.501245	0	0	0	0	0.135015	0.0327062	0	0	0	2.0837	32.9275	0.576962	0.0175452	0	1.15466	0	0	0.0334762	0	0	1.00471	0.0834902	1.02838	0.148131	0.310911	0.0168332	0	0	0	13.8938	2.57208	6.77003
16	Toyama	8	Wearing aparel and other textile products	3.45903	0	0.262019	0.0783245	1.98435	0.210109	0.0534921	2.96918	0.391874	0.466289	0.445241	0.344989	0.0460382	0.202854	0.158999	0	0.132431	0.022005	0	0.260471	0.456229	0	0.281134	0.212019	0.439503	1.01002	0.213271	0.0843296	0.469747	0	0.00726223	0.329745	0.0362864	0.0760825	0.398157	0.157479	0.740435	0.389787	0.250351	0.440983	0.0546686	0.485794	0.245255	0.543631	0.166615	2.0095
16	Toyama	9	Timber and wooden products	5.23734	0	0.0891404	0.0621749	2.87871	0.556854	0	0.200055	66.7593	59.3405	0.0143286	1.62133	0.0156624	0.00862652	0	0	0.00852366	0.0149724	0	0.187721	0	0	0	0.617949	0.0234324	2.20204	0.122594	1.22169	1.39834	0	0	1.40345	0	0	2.95397	0.416696	2.04477	0.164293	0.220511	0.0840138	0.206772	0.217402	0.0748794	0.881961	0.0700207	1.8882
16	Toyama	10	Furniture and fixtures	0.144074	0	0.229735	0.238865	4.05155	0.198948	0.0251898	0.811643	0.13309	22.5493	0.409418	0.448077	0.140402	0.067664	0.684643	0	0.219674	0.109051	0	0.777369	1.57494	0	0.0107171	2.10263	0.726439	0.104392	0.235493	0.253161	0.455821	0	0.0387582	0.814391	0	0.0451165	0.429076	0.102723	0.538021	0.395805	0.329453	0.263593	0.0686503	0.356708	0.436305	2.56586	0.296406	30.0837
16	Toyama	11	Pulp, paper, paperboard, building paper	1.44713	0	0	0	32.9952	0.217996	0.0759045	1.09475	6.38799	17.7759	700.718	432.258	127.424	0	11.8261	0	0	5.6621	0	24.389	5.12425	0	0	21.4758	7.80647	29.4262	0	2.37331	14.4506	0	0	0	0.145888	0	3.13998	0.112558	1.09013	0.637944	0.0275761	2.49632	0	17.6436	0.353962	23.7962	1.2872	24.96
16	Toyama	12	Paper products	43.6372	0	0	0	69.0266	23.2125	0.141672	2.82585	0.160398	6.32344	0.722398	10.4652	0.493529	1.09817	2.92859	0	0.655345	0.179279	0.0849335	12.6739	23.4322	0	0.012055	6.07901	0.639917	18.8306	0.0993342	3.06913	2.21112	0	0	0	0.261401	0	0.861858	0.0105042	5.15451	1.06645	0.18529	0.995388	0.405407	1.35051	0.670092	7.87325	1.51014	14.6264
16	Toyama	13	Publishing, printing	0.0559591	0	0.015181	0.0226899	11.1292	0.593288	0.0404116	0.975112	0.0866899	0.841254	0.0813404	2.76531	5.17471	0.048971	0.351737	0	0.0362903	0.0488724	0.0148763	2.40698	0.863971	0	0.00814423	0.201067	0.226136	1.32217	0.0521958	0.0308763	0.144329	0.00209521	0.00981776	0.381758	0.00245277	0.0999984	0.20185	0.0685995	0.787164	0.333425	0.4984	0.264696	0.534733	0.174103	0.25717	0.787754	0.490242	10.2546
16	Toyama	14	Chemical fertilizer	282.004	0	0	0	0.0716652	0.233458	0	0.0285082	0	0	0	0.0300458	0	100.746	23.7561	0	12.2581	1.88717	0	7.52154	3.10019	0	0	0	0.0968358	0.700002	0	0	0.315202	0	0.0714705	0	0	1.08154	0.0376772	0	0	0	0.0337508	0	0	0	0	2.47442	0	0
16	Toyama	15	Basic inorganic chemical products	0.332963	0	0.00474327	0	4.9276	0.983401	0.582151	0.869968	0.00451436	0.0850184	1.91754	0.286286	0.00416709	5.94441	61.3835	0	12.5907	1.25879	0.0239044	21.02	11.5672	0	0.0203572	4.18241	31.978	12.1725	0.0931914	0.454163	0.423897	0.0942688	0.0460132	0.328946	0.0183927	1.20514	0.446325	0.922392	0.823743	0.201071	0.178178	0.429166	0.0326003	0.326389	0.255003	13.7863	0.0579583	4.24267
16	Toyama	16	Basic organic chemical products	0	0	0	0	0	0	0	0	0	0	0	0	0	0	0	0	0	0	0	0	0	0	0	0	0	0	0	0	0	0	0	0	0	0	0	0	0	0	0	0	0	0	0	0	0	0
16	Toyama	17	Organic chemical products	0.0298445	0	0.00620725	0	7.40245	0.994695	0.714866	0.0096074	0.336738	0.522916	4.82418	3.25031	0.103611	0.492577	34.1631	0	58.5647	72.9871	3.9155	52.8557	35.0602	0	0.079921	32.8554	135.263	2.53007	0.0365863	0.0291342	8.95829	0	0	0	0	0.623829	1.55543	0.0232131	0.201762	0.0286011	0.0284355	0.187208	0.143985	0.302773	0.0782128	6.44575	0.563432	1.9004
16	Toyama	18	Synthetic resins	0	0	0	0	0	0	0.00928228	0	0.0420366	2.09793	7.49015	2.05341	0.203715	0	0	0	0	0.120554	1.01094	20.6046	0	0	0	336.088	0.183834	15.3067	0	0	1.64818	0	0	0	0	0	4.60783	0.0103234	0.389678	0	0	0.291396	0.113837	2.10632	0	9.37152	1.50343	16.5243
16	Toyama	19	Synthetic fibers	0	0	0	0	110.741	0	49.0613	131.564	0.174856	3.18328	4.42978	0.0998994	0	0	0	0	0	0	0	0	0	0	0.45996	4.03832	0.375631	12.7427	0	0	28.5876	0	0	0	0	0	0	0	0	0	0	0	0	0	0	0	0	0
16	Toyama	20	Final chemical products	63.343	0	0.827616	0.0802761	6.93186	0.417743	0.812699	1.88743	7.77916	9.6488	11.9729	7.31776	8.66065	0.559937	1.27271	0	5.34352	1.45776	0.153794	73.1418	9.45111	0	2.10604	9.51057	5.39078	3.31234	1.82748	0.0206255	4.63049	0	0.0142097	1.96991	0.0284	0.0496225	1.49819	2.37605	7.08066	1.45787	2.18756	1.20109	2.00093	2.09245	0.90439	9.98548	0.460249	9.52198
16	Toyama	21	Medicaments	25.8032	0	0	0	2.6329	0	0	0.155164	0	0	0	0	0	0	0	0	0	0	0	0.79551	175.331	0	0	0	0	0	0	0	0	0	0	0	0	0	0	0	0	0	0	0	0	0	0	0	0	0
16	Toyama	22	Petroleum refinery products	35.8436	0	1.4763	0.154844	22.8183	5.12886	1.5498	0.759838	2.70255	0.702679	3.86611	1.63045	1.1046	4.94913	20.7373	0	2.25594	0.557629	0.106795	6.1959	5.34333	0.00783152	12.9676	5.87012	3.9241	19.3285	2.85887	1.02114	7.97811	0.0467949	0.178159	3.42905	0.219123	8.35925	2.38413	1.1689	6.46812	1.65339	2.65988	1.88405	0.424796	1.14439	0.142406	3.23794	0.265098	1.53259
16	Toyama	23	Coal products	0	0	3.09851e-05	0	0	0	0	0	1.47449e-05	0	9.96118e-05	0	0	0.00112446	0.00143582	0	0.0151992	0	0	8.51105e-05	0	0	0	7.85847e-05	0	0	0	0	0.00329932	5.1317e-05	0.000826589	0.00876948	1.50186e-05	0.00211682	0.000190147	0.000289686	5.75512e-05	0	4.25829e-05	2.92031e-05	0	4.04831e-05	0	1.40628e-05	0	1.32862e-05
16	Toyama	24	Plastic products	37.5553	0	0.0389576	0.174682	109.061	62.1816	0.114621	11.0646	5.30208	32.4524	14.0741	64.3123	30.5632	2.90298	17.0936	0	0.13038	0	0.16361	39.7898	67.2677	0	0	856.72	58.3898	18.4146	0.344431	0.274275	2.12968	0	0	0.127784	0	1.0558	16.8745	1.16551	5.77065	5.18768	8.20941	8.62852	10.2583	25.2462	5.56325	277.258	15.4708	288.892
16	Toyama	25	Rubber products	1.19258	0	0.163016	0.0923639	0.342011	0.0260448	0.00268699	0.818778	0.0517164	0.272139	0.197811	0.406703	0.0870518	0.0556794	0.0524586	0	0.0702977	0.0295285	0	0.237059	0.457614	0	0.0342959	0.370209	13.0714	0.00303695	0.07222	0	0.313006	0.00794075	0.0682163	0.209688	0.00619726	0.0216565	0.0457694	0.358606	0.341375	2.01774	5.26261	0.786282	0.741444	1.3002	0.451085	1.55806	0.488212	6.66108
16	Toyama	26	Glass and glass products	0.152844	0	0	0	2.5339	18.1718	0.0148463	0.280184	0.0336171	12.4168	0	0	0	0	1.79023	0	0.202649	0	0	2.45791	9.93432	0	0	7.7639	0.410091	20.3037	0.104095	0	0.654834	0	0	0	0	0	1.21928	0.156859	1.0743	0.23599	0.194171	0	0.341388	0.0769153	0.437645	25.1606	0.477841	2.287
16	Toyama	27	Cement and cement products	0.000884137	0	0	0.00366461	0	0	0	0	0	0	0	0	0	0	0	0	0	0	0	0.000841849	0	0	0.00197304	0	0	0	4.66422	0	0.0393361	0	0	0	0	0	0	0	0.0162237	0	0	0	0	0	0	0.00166918	0	0
16	Toyama	28	Pottery, china and earthenware	0	0	0	0	0.0973337	0.020707	0	0	0	0.412515	0	0	0	0	0.0772812	0	0	0	0	0.0157062	0	0	0	0.0338378	0	0.00271635	0.0280852	0.220068	0	0	0	0.00267931	0	0	0	0	0.0345163	0.00526929	0.013097	0	0.00245619	0.445751	0.00720473	0.155707	0.00499055	0.512428
16	Toyama	29	Other ceramic, stone and clay products	5.1359	0	0	0.0427803	0.175403	0.0155482	0	0	0.0572068	0.315515	1.26293	0.00700362	0.00754373	0.0830984	15.195	0	0.156004	0.25961	0	0.676144	0.980144	0	1.28985	0.580746	0.16553	15.6479	9.21976	1.4912	19.4214	0.775063	0.0333193	7.99894	0	7.24317	1.56328	1.05969	3.54865	9.2029	1.54985	2.48454	0.0590167	3.04408	0.555405	12.7671	0.232329	5.94268
16	Toyama	30	Pig iron and crude steel	0	0	0	0	0	0	0	0	0	0	0	0	0	0	0.250474	0	0	0	0	0	0	0	0	0	0	0	0	0	-0.00666668	6.66035	0.142849	38.5883	0.47584	0	0	-0.150785	-1.70619	-0.400645	-0.957266	-0.0991339	-0.0240973	-0.19545	0	-1.203	0	-0.757709
16	Toyama	31	steel products	0.0382558	0	0.0336629	0.182959	0	0	0	0.00710488	0.0757269	3.40632	0	0	0	0	0	0	0	0	0	0	0	0	0	0.918442	1.0163	0	3.47524	0	0.331679	0	17.4232	17.225	28.4205	0.0656582	0.20658	19.5156	55.7694	12.7161	11.3555	13.6541	0.425919	8.23393	0.524417	9.58077	1.65867	10.5056
16	Toyama	32	Cast and forged steel products	0	0	0	0.0423496	0	0	0	0	0	1.29506	0	0	0	0	0	0	0	0	0	0	0	0	0	0	0	0	0.125255	0.718146	0.646519	0	0	13.4231	0	0	0.956347	36.3582	45.668	93.3741	107.514	98.3009	4.38169	44.0169	4.39137	16.7435	0.890282	9.44026
16	Toyama	33	Other iron or steel products	0	0	0	0	0	0	0	0	0.00804643	7.46701	0	0	0	0	0.269343	0	0.0040421	0	0	0.0193524	0	0	0	0.0321634	0	0	0.622894	0.0198408	0.337589	0	0	0.843819	0	0	0.155648	15.6464	51.1373	5.72256	7.06821	1.42233	0.286903	3.64888	0.00710187	6.87609	1.99969	2.37813
16	Toyama	34	Non-ferrous metals	0	0	0	0	0	0	0	0	0.00350831	0.0991076	0.0474022	0	-0.0518149	0	16.1172	0	0.109268	0	0	3.11187	0	0	0	0.143352	-0.00323	1.63559	0	0.311427	1.57355	0.122101	0.168067	0.359276	-0.0107204	41.9083	207.98	0.0827116	11.3964	-0.0849247	0.148602	0.173711	-0.0031669	1.1912	0.065026	77.3299	0.0353902	1.07482
16	Toyama	35	Non-ferrous metal products	0	0	0	0.597375	68.5541	4.64376	0	0	2.53595	37.4313	0	2.98824	5.85216	0	13.1189	0	0	0	0	12.1374	8.4413	0	0	20.893	12.5494	5.25311	0	0.437717	8.61301	0	0	0.436993	0	7.22121	321.649	171.327	358.87	132.964	77.8761	158.588	8.29819	256.979	45.5485	1107.61	50.5814	735.849
16	Toyama	36	Metal products for construction and architecture	0.472779	0	0	0.408249	0	0	0	0	0.311954	6.16874	0	0	0	0	0	0	0	0	0	0	0	0	0	0	0	0	1.52944	0	0	0	0	0.230382	0	0	0.167621	56.998	15.8288	3.70017	0	4.78828	0	0	0	0	0	1.26492
16	Toyama	37	Other metal products	2.33141	0	1.8896	1.24557	8.43805	43.0637	0	1.34535	4.68693	16.7002	0.719625	0.355664	0.117482	0	8.62155	0	3.78605	0.478522	0	5.31285	8.8638	0	0.193388	2.09884	19.2066	1.62962	4.03237	0.720435	2.90203	0	0	3.84686	0.00563632	0.413623	1.39747	11.5837	59.5249	20.5318	17.6855	12.2912	4.12093	11.1212	4.11721	19.031	3.71964	68.6243
16	Toyama	38	General industrial machinery	0.0469461	0	0.265027	0.0555954	0	0	0	0	0.0066378	0.175013	0	0	0	0	0	0	0	0	0	0	0	0	0.00748319	6.1733	0	10.2909	0.00685132	0.111298	0.596765	0	0	0.967348	0.0540884	0.0551291	0.121267	0.208656	1.08815	100.45	19.6811	3.67447	2.199	2.30237	1.19515	0.981265	2.20964	1.53715
16	Toyama	39	Special industrial machinery	0	0	0	0	0	0	0	0	0	0	0	0	0	0	0	0	0	0	0	0	0	0	0	0	0	0.245138	0	0	0	0	0	0	0	0	0	0	0	1.99269	206.119	0.0115795	0.0316657	0.021403	0.0309616	0.769506	0.0750623	0
16	Toyama	40	Other general machines	0	0	0.675386	0.0934678	0	0	0	0	0.107132	8.92789	0	0	0	0	0	0	0	0	0	0.188952	0	0	0	1.20539	0	0.106949	0.0184297	0.810104	1.55175	0	0	2.26806	0	0	0.575647	0.78929	2.31725	27.3162	31.0426	84.8725	1.56342	23.3187	3.5616	2.33302	2.50525	20.5455
16	Toyama	41	Machinery for office and service industry	0	0	0	0	0	0	0	0	0	0	0	0	0	0	0	0	0	0	0	0	0	0	0	0	0	0	0	0	0	0	0	0	0	0	0	0	0	0	0	0	9.17254	0	0	0	0	0
16	Toyama	42	Industrial electric equipment	0.078957	0	0.0041055	0	0	0	0	0	0.00390737	0.0294348	0	0	0	0	0	0	0	0	0	0	0	0	0	0.00347081	0	0	0	0	0	0	0	0	0	0	0.00419906	0.211107	0.0266892	5.15674	7.74863	0.158645	1.24154	27.8677	2.52099	1.79623	1.63754	18.3294
16	Toyama	43	Applied electric equipment and electric mesuring instruments	0	0	0	0	0	0	0	0	0	0	0	0	0	0	0	0	0	0	0	0	0	0	0	0	0	0	0	0	0	0	0	0	0	0	0	0	0	0.0817359	0.418987	0.0253083	0.0426438	0.119782	1.30555	0	0	0.0432655
16	Toyama	44	Other electric equipment	0.0661528	0	0.00163796	0	0.0223058	0	0	0	0	0.0601856	0	0	0	0	0.00474386	0	0	0	0	0.022496	0.00158446	0	0	0.00276948	0	0	0	0	0	0	0	0	0	0	0.00335058	0	0.0958333	0.0467928	0.219103	0.0602067	0.10554	0.517894	0.343979	15.1133	0.328807	5.61455
16	Toyama	45	Household electric and electric applications	0	0	0	0	0	0	0	0	0	0	0	0	0	0	0	0	0	0	0	0	0	0	0	0.000909224	0	0	0	0	0	0	0	0	0	0	0	0	0	0	0	0	0	0	0	0	1.73374	0
16	Toyama	46	Communication equipment	0.00040267	0	0	0	0	0.00151646	0	0.000324064	0	0.000375283	0.000336552	0	0.000367882	0	0.00040426	0	0	0	0	0	0.0129622	0	0	0.000354012	0.00220154	0.000795721	0.00041136	0	0	0	0	0.000392436	0	0.00189143	0.000428292	0.000782994	0.000777779	0.0123486	0.00383659	0.000394666	0	0	0.00738688	0.00304083	0.00036548	4.46737
16	Toyama	47	Electric computing equipment and accessory equipment	0	0	0	0	0	0	0	0	0	0	0	0	0	0	0	0	0	0	0	0	0	0	0	0	0	0	0	0	0	0	0	0	0	0	0	0	0	0	0.00140332	0	0	0	0	0	0	0.000256028
16	Toyama	48	Semiconductor devices and integrated circuits	0	0	0	0	0	0	0	0	0	0	0	0	0	0	0	0	0	0	0	0	0	0	0	0	0	0	0	0	0	0	0	0	0	0	0	0	0.615369	0.287355	3.04737	1.06534	13.3053	17.2468	67.1534	2.48843	15.5921	506.201
16	Toyama	49	Other electrical equipment	0	0	0	0	0.0267941	0.00831285	0	0	0	0	0	0.014978	0.435593	0	0	0	0	0	0	0	0.0177639	0	0	0.00776242	0	0	0	0	0	0	0	0	0	0	0.225388	0	1.62016	3.29151	4.50068	0.536538	14.6881	15.4995	82.1969	1.89194	15.2103	680.439
16	Toyama	50	Passenger motor cars	0	0	0	0	0	0	0	0	0	0	0	0	0	0	0	0	0	0	0	0	0	0	0	0	0	0	0	0	0	0	0	0	0	0	0	0	0	0	0	0	0	0	0	0	0	0
16	Toyama	51	Other cars	0	0	0	0	0	0	0	0	0	0	0	0	0	0	0	0	0	0	0	0	0	0	0	0	0	0	0	0	0	0	0	0	0	0	0	0	0	0	0	0	0	0	0	0	0	0
16	Toyama	52	Motor vheicle parts and accessories	0	0	0	0	0	0	0	0	0	0	0	0	0	0	0	0	0	0	0	0	0	0	0	0	0	0	0	0	0	0	0	0	0	0	0	0	0	0	0.278824	0	0	0	0	0	0	0
16	Toyama	53	Other transportation equipment	0.636929	0	0.000560849	0	0	0	0	0	0	0	0	0	0	0	0	0	0	0	0	0	0	0	0	0	0	0	0	0	0	0	0	0	0	0	0	0	0	0	0	0	0	0	0	0	0	0
16	Toyama	54	Precision instruments	0.0266445	0	0	0.000766925	0.00598944	0	0	0.000595644	0.000732535	0.000689787	0.00804177	0.00125554	0	0	0.00371524	0	0	0	0	0.000704725	0.00446722	0	0	0.0130138	0.00134884	0	0.000756098	0.00216753	0.000731753	0	0	0.000721315	0	0	0	0.00215877	0.00142959	0.163137	0.57825	0.00290166	0.0330623	0.0951983	0.0400857	0.00209594	0.00134354	1.68251
16	Toyama	55	Miscellaneous manufacturing products	2.67509	0	1.01283	0.188386	2.02294	2.72646	0	20.9959	1.68371	9.13753	0.195365	0.132175	0.035592	0.0261377	0.0130372	0	0.142043	0	0	0.222566	0.0130633	0	0.0869378	0.445252	0.0591655	2.15557	0.0530646	1.07753	1.7461	0	0	3.07537	0	0.0152494	1.62984	0.328265	0.451493	4.44282	0.210338	0.0763667	0	0.188203	0.397038	0.306454	0.0471461	5.08415
16	Toyama	56	Reuse and recycling	0.0519624	0	0	0	0.0198887	1.30505	0	0	0	0	0.872127	0	0	0.385848	0.270708	0	0.0614465	0	0	0	0	0	0	2.80274	0.0191958	0.574473	0.136296	0.0534676	0.0791447	0.201971	0.00283352	1.58358	0.0538003	2.29402	3.8494	0	0.00271266	0	0	0	0	0	0	0.0159082	0	0
16	Toyama	57	Building construction and repair of construction	0	0	0	0	0	0	0	0	0	0	0	0	0	0	0	0	0	0	0	0	0	0	0	0	0	0	0	0	0	0	0	0	0	0	0	0	0	0	0	0	0	0	0	0	0	0
16	Toyama	58	Public construction	0	0	0	0	0	0	0	0	0	0	0	0	0	0	0	0	0	0	0	0	0	0	0	0	0	0	0	0	0	0	0	0	0	0	0	0	0	0	0	0	0	0	0	0	0	0
16	Toyama	59	Other civil enginnering and construction	0	0	0	0	0	0	0	0	0	0	0	0	0	0	0	0	0	0	0	0	0	0	0	0	0	0	0	0	0	0	0	0	0	0	0	0	0	0	0	0	0	0	0	0	0	0
16	Toyama	60	Electricity	3.99313	0	0.615067	0.991921	7.86071	1.73654	0.264499	1.0359	1.69355	0.888967	8.08794	0.882988	0.924533	0.875639	9.71336	0	3.07154	0.485197	0.274734	2.29821	1.3172	0	0.249861	7.23614	4.42994	4.0907	0.791066	0.195238	2.95421	0.385679	0.219005	9.251	0.313636	7.52555	4.00541	0.774474	7.08232	1.77414	1.63032	1.77426	0.542161	1.00799	0.294171	5.35714	0.299442	2.90872
16	Toyama	61	Gas supply and heat supply	0	0	0	0	0	0	0	0	0	0	0	0	0	0	0	0	0	0	0	0	0	0	0	0	0	0	0	0	0	0	0	0	0	0	0	0	0	0	0	0	0	0	0	0	0	0
16	Toyama	62	Water supply and waste management services	3.96231e-06	0	1.21654e-06	7.23401e-07	2.79613e-05	1.22397e-05	1.12163e-06	8.50353e-07	1.28855e-06	1.1606e-06	1.93814e-05	2.08051e-06	9.99809e-07	3.20909e-06	1.66885e-05	0	9.6063e-06	7.53076e-06	4.28505e-07	1.18933e-05	1.47859e-05	0	1.68424e-07	8.09504e-06	3.74811e-06	5.4437e-06	6.12956e-06	3.31543e-07	6.26799e-06	1.62485e-07	6.47169e-07	3.03412e-06	4.18471e-07	6.492e-06	4.77636e-06	1.39419e-06	5.19339e-06	5.31612e-06	7.19095e-06	2.45959e-06	4.55147e-07	1.99964e-06	7.58193e-07	1.03659e-05	4.79515e-07	8.44725e-06
16	Toyama	63	Commerce	30.4147	0	0.908061	0.279291	89.3583	7.89399	0.660136	12.9217	10.4458	12.423	21.1144	12.4983	5.49068	1.45266	9.73475	0	8.66079	2.68081	0.173168	12.4545	10.8903	0	1.65284	36.7624	20.5679	9.29012	4.7765	0.6741	5.02353	0.115096	0.777517	7.85222	3.60423	12.2263	10.5267	7.25302	18.6152	13.3762	13.7487	6.9384	3.98425	9.87873	7.62981	30.281	3.68979	79.9102
16	Toyama	64	Financial and insurance	0.0184321	0	0.00368813	0.00136967	0.0193569	0.00352286	0.000931529	0.00864769	0.00370739	0.00468504	0.00421172	0.00361874	0.00206595	0.00135891	0.00590426	0	0.00301299	0.00167301	8.88134e-05	0.00896501	0.00452503	0	0.000145218	0.00409769	0.00553314	0.00734587	0.00499832	0.000535991	0.00300376	7.70534e-05	0.000356955	0.00266759	0.000692923	0.0100297	0.00863882	0.00357465	0.00595472	0.00444723	0.00458811	0.00373513	0.000425138	0.00165412	0.00111204	0.00936376	0.00062755	0.0170295
16	Toyama	65	Real estate agencies and rental services	1.58784e-07	0	1.7465e-07	2.97425e-07	1.1058e-06	4.34112e-07	2.66939e-08	3.88277e-07	1.60177e-07	5.43558e-07	4.00687e-07	3.93679e-07	2.98501e-07	8.60451e-08	5.61003e-07	0	4.19023e-07	1.86678e-07	1.60032e-08	4.53567e-07	1.15497e-06	0	4.42926e-08	1.05771e-06	4.56324e-07	7.78402e-07	4.05526e-07	4.17319e-08	2.14348e-07	5.25916e-09	2.77239e-08	3.51159e-07	4.00183e-08	4.19537e-07	2.63074e-07	5.4626e-07	9.49588e-07	3.97978e-07	4.56771e-07	3.35198e-07	6.00182e-08	2.62761e-07	1.97391e-07	2.29728e-06	8.31453e-08	3.20524e-06
16	Toyama	66	House rent	0	0	0	0	0	0	0	0	0	0	0	0	0	0	0	0	0	0	0	0	0	0	0	0	0	0	0	0	0	0	0	0	0	0	0	0	0	0	0	0	0	0	0	0	0	0
16	Toyama	67	Transport	32.8928	0	7.28901	0.661866	26.8849	4.01761	0.226572	2.33317	5.89854	3.27478	5.23441	3.53295	1.96934	0.654221	4.00681	0	2.16178	0.919026	0.0791734	3.61271	4.28553	0.00163293	0.801197	7.10597	3.51415	3.73068	8.59565	0.248861	3.60004	0.0682996	0.322897	3.43412	0.978024	14.4477	4.19077	3.48374	7.38613	3.46645	3.11713	2.26125	0.66936	2.09107	1.10605	8.46793	0.529612	12.5234
16	Toyama	68	Communication	0.00844489	0	0.00181218	0.00461842	0.0137968	0.00495354	0.000585914	0.00833363	0.00228858	0.00630892	0.00492958	0.00488898	0.00443937	0.000809414	0.00857918	0	0.00219935	0.0010829	0.000117087	0.00615837	0.0958411	0	0.000747841	0.0142596	0.0200015	0.00682092	0.00356041	0.00042528	0.00371083	0	0.000473294	0.0055195	0.000270269	0.0171972	0.0090179	0.0141404	0.0145965	0.01837	0.0114626	0.00919672	0.00197604	0.00698163	0.00582558	0.0223965	0.00197707	0.0451885
16	Toyama	69	Broadcasting	0	0	0	0	0	0	0	0	0	0	0	0	0	0	0	0	0	0	0	0	0	0	0	0	0	0	0	0	0	0	0	0	0	0	0	0	0	0	0	0	0	0	0	0	0	0
16	Toyama	70	Information services	0.00246483	0	7.70517e-05	0.000117723	0.00542634	0.00232065	3.88632e-05	0.000568466	0.000571999	0.00174476	0.00118487	0.000842129	0.000595689	0.000462312	0.000947178	0	0.00115919	0.000591017	2.58875e-05	0.00138276	0.00854665	0	8.26729e-05	0.00381286	0.00262411	0.00174235	0.000903259	0.000202523	0.00136254	3.82836e-05	0.000154475	0.00112648	0.000313718	0.00237822	0.00223288	0.00111898	0.00481343	0.00290178	0.00488988	0.00168964	0.000498681	0.00354809	0.00437971	0.0112791	0.00022865	0.0198191
16	Toyama	71	﻿Internet based services	3.08508e-05	0	1.06943e-05	1.5984e-05	0.00029647	0.000150072	8.98991e-06	0.000157247	6.10689e-05	0.000143763	5.58679e-05	6.10576e-05	0.000108045	1.03493e-05	0.000129053	0	4.09037e-05	1.34719e-05	0	9.30216e-05	0.00150519	0	5.73721e-06	0.000411364	0.000220212	0.00012701	6.30333e-05	5.01942e-06	5.08364e-05	0	5.1871e-06	0.000125278	5.18357e-06	0.000326055	0.000169538	0.000224961	0.000312848	0.000256234	0.000215558	0.000100792	2.29691e-05	0.000167669	0.000139242	0.000572731	3.73353e-05	0.00126104
16	Toyama	72	Image information production and distribution industry	0.0449912	0	0.0210545	0.0194251	0.165358	0.0155318	0.0157325	0.167766	0.0222649	0.0894534	0.0645531	0.083319	0.0246626	0.130554	0.109158	0	0.0231151	0.0124429	0.00130997	0.0799667	0.353024	0	0.00753017	0.162833	0.258966	0.170407	0.0934565	0.0175682	0.0986024	0.000645744	0.00302584	0.0423862	0.00604755	0.0713253	0.0382833	0.0656143	0.314299	0.106355	0.118599	0.0507116	0.0288074	0.0889782	0.0812252	0.465045	0.0245015	0.920858
16	Toyama	73	Public administration	0	0	0	0	0	0	0	0	0	0	0	0	0	0	0	0	0	0	0	0	0	0	0	0	0	0	0	0	0	0	0	0	0	0	0	0	0	0	0	0	0	0	0	0	0	0
16	Toyama	74	Education and Research	0.0151995	0	0.00174606	0.0127281	0.36659	0.0736319	0.00247207	0.0268828	0.00428568	0.0502389	0.0313162	0.031106	0.00242204	0.0644769	0.346001	0	0.141476	0.0706178	0.00617509	0.433502	1.90602	0	0.00443709	0.492094	0.42686	0.447657	0.0854013	0.0206175	0.136471	0.002283	0.010252	0.0486596	0.000178174	0.109895	0.179807	0.0726	0.0941354	0.179876	0.264631	0.0627076	0.0732667	0.381976	0.374862	1.71588	0.1236	2.45833
16	Toyama	75	Medical service, health and social security and nursing care	0.000415235	0	0.000224545	0.000249557	0.00352829	0.00116502	3.62998e-05	0.000862176	0.000230147	0.000294116	0.000728814	0.000373333	0.000212443	0.00015044	0.000875438	0	0.000388131	0.000152313	2.9016e-05	0.000877732	0.00345029	0	6.48646e-05	0.00130691	0.00166485	0.000566181	0.000483584	4.86423e-05	0.000262744	7.15168e-06	4.18893e-05	0.000679866	0.000133955	0.000468109	0.000273827	0.000613645	0.00170837	0.00168725	0.000989079	0.00156281	0.000259687	0.000564184	0.000246658	0.00155218	0.000105528	0.00351803
16	Toyama	76	Advertising and survery	0	0	0	0	0	0	0	0	0	0	0	0	0	0	0	0	0	0	0	0	0	0	0	0	0	0	0	0	0	0	0	0	0	0	0	0	0	0	0	0	0	0	0	0	0	0
16	Toyama	77	Giids rental and leasing services	0.310927	0	0.0420285	0.046769	0.557127	0.0888773	0.0165047	0.0902161	0.0756208	0.136917	0.101583	0.0760656	0.0703426	0.00771894	0.151931	0	0.0252275	0.0332354	0.0020614	0.0747162	0.082795	0	0.0566151	0.480578	0.276068	0.234637	0.311008	0.0190064	0.217287	0.00355656	0.0110111	0.153525	0.0234941	0.0672051	0.162218	0.0986635	0.672939	0.495869	0.491873	0.269184	0.0619362	0.493806	0.15565	0.85489	0.0516762	2.38752
16	Toyama	78	Other business services	0.000734374	0	8.00495e-05	7.23523e-05	0.00140786	0.000205193	1.11879e-05	0.000293842	0.000165784	0.000192594	0.000151639	0.000172724	0.000228171	4.98141e-05	0.00048862	0	0.000135309	5.30916e-05	4.60301e-06	0.000225616	0.000494143	0	3.29697e-05	0.00091203	0.000793004	0.000732856	0.000389532	1.4698e-05	0.00026032	2.59319e-06	1.32904e-05	0.000406645	1.57479e-05	0.000375938	0.000328096	0.000329918	0.00057401	0.000530089	0.000386433	0.000192396	7.68431e-05	0.000304984	0.000253517	0.000935545	8.74611e-05	0.00169592
16	Toyama	79	Personal services	0.044415	0	0.00115472	0	0.0348195	0.0088861	0	0.00714894	0.00549494	0.00465685	0.0069604	0.00376726	0.00304334	0.00111747	0.0105902	0	0.00276037	0.00242439	0	0.00528633	0.0106115	0	0	0.0161073	0.0111299	0.00603413	0.00510453	0.000541974	0.00109782	0	0	0.00378754	0.00111939	0.0143431	0.0118103	0.00377848	0.0144771	0.00851292	0.00793465	0.00489738	0.0024801	0.00905207	0.00436491	0.0303963	0.00100782	0.044562
16	Toyama	80	Activities not elsewhere classified	0	0	0	0	0	0	0	0	0	0	0	0	0	0	0	0	0	0	0	0	0	0	0	0	0	0	0	0	0	0	0	0	0	0	0	0	0	0	0	0	0	0	0	0	0	0
17	Ishikawa	1	Agriculture, forestry and fishery	129.16	0	0.00307329	0.0581835	363.803	9.4741	0.0284185	0.0642161	40.7244	0.00275428	0	0.00501331	0	0.0356899	0.269992	0	0.464315	0	0	0.37988	0.942408	0	0.0428674	0	25.2085	0	0	0	0.0525933	0	0	0	0	0	0.00942998	0	0	0	0	0	0	0	0	0	0	0
17	Ishikawa	2	Metallic ores	0	0	0	0	0	0	0	0	0	0	0	0	0	0	0	0	0	0	0	0	0	0	0	0	0	0	0	0	0	0	0	0	0	0	0	0	0	0	0	0	0	0	0	0	0	0
17	Ishikawa	3	Non-metallic ores	0.0120531	0	0.029247	0	0	0	0	0	0	0	0.221628	0.00113593	0	0.26282	1.73847	0	0.134504	0	0	0.0943633	0.0175139	0	0.581289	0	0.0854244	6.40052	4.1482	0.308537	2.99244	-0.0011533	0	0.0430716	0	0.0251628	0.00427336	0.00260415	0.00517362	0	0	0.0196893	0	0	0	0	0	0
17	Ishikawa	4	Coal mining, crude petroleum and natural gas	0	0	0	0	0	0	0	0	0	0	0	0	0	0	0	0	0	0	0	0	0	0	0	0	0	0	0	0	0	0	0	0	0	0	0	0	0	0	0	0	0	0	0	0	0	0
17	Ishikawa	5	Food and Tobacco	106.303	0	0	0	293.732	24.1766	0	1.18472	0.0221426	0	1.4211	0.00379518	0	0.031521	0.157223	0	0.916559	0.00781555	0	1.25256	5.16275	0	0	0.0668736	0	0.13705	0	0.0174717	0.353904	0	0	0.0043607	0	0	0	0	0	0	0	0	0	0	0	0	0	0
17	Ishikawa	6	Beverage	0.703907	0	0	0	1.13849	1.74786	0	0	0	0	0	0	0	0	0	0	0.00769185	0	0	0	0.0350161	0	0	0	0	0	0	0	0	0	0	0	0	0	0	0	0	0	0	0	0	0	0	0	0	0
17	Ishikawa	7	Textile products	17.0375	0	0	0	1.99557	0.0422129	31.0426	794.624	0.754388	20.6424	12.9659	59.592	0.819243	1.30854	0	0	0	0	0.352467	0.0853822	0	0	0	5.43966	85.9599	1.5062	0.0458032	0	3.01433	0	0	0.0873922	0	0	2.62287	0.217958	2.68468	0.386709	0.811658	0.0439445	0	0	0	36.2708	6.71462	17.6737
17	Ishikawa	8	Wearing aparel and other textile products	2.20875	0	0.167312	0.0500139	1.2671	0.134165	0.0341572	1.89596	0.25023	0.297748	0.284308	0.220292	0.0293976	0.129532	0.101529	0	0.0845633	0.0140512	0	0.166323	0.291324	0	0.179518	0.135384	0.280644	0.644947	0.136184	0.0538485	0.299956	0	0.00463728	0.210558	0.0231706	0.0485823	0.254242	0.100558	0.472803	0.248898	0.159861	0.281589	0.0349085	0.310203	0.156607	0.347134	0.106392	1.28316
17	Ishikawa	9	Timber and wooden products	1.27109	0	0.0216341	0.0150897	0.698657	0.135147	0	0.0485528	16.2023	14.4018	0.00347751	0.393492	0.00380123	0.00209363	0	0	0.00206867	0.00363377	0	0.0455593	0	0	0	0.149975	0.005687	0.534429	0.0297533	0.296501	0.339374	0	0	0.340615	0	0	0.71692	0.101131	0.496259	0.0398734	0.0535174	0.0203899	0.050183	0.0527629	0.018173	0.21405	0.0169938	0.458262
17	Ishikawa	10	Furniture and fixtures	0.342813	0	0.546638	0.568363	9.64037	0.473382	0.0599374	1.93125	0.316678	53.6544	0.974182	1.06617	0.334077	0.161002	1.62906	0	0.522699	0.25948	0	1.8497	3.74745	0	0.0255007	5.00306	1.72851	0.248394	0.560339	0.602378	1.08459	0	0.0922223	1.93779	0	0.107352	1.02096	0.244421	1.28018	0.941789	0.783909	0.6272	0.163348	0.848762	1.03816	6.10529	0.705278	71.5819
17	Ishikawa	11	Pulp, paper, paperboard, building paper	0.098656	0	0	0	2.24941	0.0148616	0.00517469	0.0746334	0.435493	1.21185	47.7706	29.4686	8.687	0	0.806231	0	0	0.386006	0	1.66269	0.349339	0	0	1.46408	0.532197	2.00609	0	0.161797	0.985154	0	0	0	0.00994573	0	0.214064	0.00767349	0.0743182	0.043491	0.00187997	0.170183	0	1.20283	0.0241309	1.62228	0.0877534	1.70162
17	Ishikawa	12	Paper products	3.27092	0	0	0	5.17403	1.73994	0.0106193	0.211817	0.0120229	0.473986	0.0541488	0.784437	0.0369935	0.0823158	0.219519	0	0.0491227	0.0134382	0.00636637	0.949994	1.75641	0	0.00090361	0.455665	0.0479663	1.41148	0.0074458	0.230053	0.165739	0	0	0	0.0195939	0	0.0646023	0.000787363	0.386367	0.0799376	0.0138888	0.0746113	0.0303881	0.10123	0.0502281	0.590155	0.113196	1.09635
17	Ishikawa	13	Publishing, printing	0.131001	0	0.0355387	0.0531173	26.0535	1.38889	0.0946038	2.28274	0.202941	1.96938	0.190418	6.47361	12.114	0.114641	0.823417	0	0.0849559	0.114411	0.0348254	5.63476	2.02256	0	0.0190657	0.470698	0.529386	3.09521	0.122191	0.0722815	0.337875	0.00490489	0.0229834	0.893698	0.00574194	0.234097	0.472532	0.160592	1.84275	0.780548	1.16676	0.619654	1.25181	0.407575	0.602037	1.84414	1.14766	24.0061
17	Ishikawa	14	Chemical fertilizer	0	0	0	0	0	0	0	0	0	0	0	0	0	0	0	0	0	0	0	0	0	0	0	0	0	0	0	0	0	0	0	0	0	0	0	0	0	0	0	0	0	0	0	0	0	0
17	Ishikawa	15	Basic inorganic chemical products	0.00330549	0	4.70888e-05	0	0.0489187	0.00976271	0.0057793	0.0086366	4.48163e-05	0.00084402	0.0190364	0.00284211	4.13687e-05	0.0590131	0.609384	0	0.124994	0.0124966	0.000237311	0.208676	0.114833	0	0.000202096	0.0415209	0.317462	0.120842	0.000925157	0.0045087	0.00420823	0.000935853	0.000456796	0.00326561	0.000182594	0.011964	0.00443089	0.00915705	0.0081777	0.00199613	0.00176886	0.00426054	0.000323639	0.00324023	0.00253154	0.136863	0.00057538	0.0421191
17	Ishikawa	16	Basic organic chemical products	0	0	0	0	0	0	0	0	0	0	0	0	0	0	0	0	0	0	0	0	0	0	0	0	0	0	0	0	0	0	0	0	0	0	0	0	0	0	0	0	0	0	0	0	0	0
17	Ishikawa	17	Organic chemical products	0.00817198	0	0.00169966	0	2.02693	0.272366	0.195744	0.00263069	0.0922052	0.143184	1.32095	0.889997	0.0283707	0.134877	9.35449	0	16.0361	19.9852	1.07214	14.4729	9.60013	0	0.0218839	8.99644	37.0376	0.692782	0.010018	0.00797748	2.45295	0	0	0	0	0.170816	0.425907	0.00635619	0.0552462	0.00783152	0.00778617	0.0512612	0.0394257	0.0829051	0.0214161	1.76497	0.154278	0.520365
17	Ishikawa	18	Synthetic resins	0	0	0	0	0	0	0.007369	0	0.033372	1.6655	5.94627	1.63016	0.161725	0	0	0	0	0.0957051	0.802562	16.3575	0	0	0	266.813	0.145942	12.1517	0	0	1.30845	0	0	0	0	0	3.65805	0.00819555	0.309357	0	0	0.231333	0.0903729	1.67216	0	7.43984	1.19354	13.1183
17	Ishikawa	19	Synthetic fibers	0	0	0	0	134.247	0	59.4752	159.49	0.211972	3.85897	5.37006	0.121104	0	0	0	0	0	0	0	0	0	0	0.557592	4.8955	0.455364	15.4475	0	0	34.6557	0	0	0	0	0	0	0	0	0	0	0	0	0	0	0	0	0
17	Ishikawa	20	Final chemical products	5.87189	0	0.07672	0.00744158	0.642582	0.0387247	0.0753371	0.174965	0.721128	0.894442	1.10989	0.678355	0.802841	0.0519061	0.11798	0	0.495343	0.135135	0.0142567	6.78024	0.876117	0	0.195229	0.881629	0.499725	0.307053	0.169407	0.00191199	0.429246	0	0.00131724	0.182611	0.00263268	0.0046	0.138882	0.220259	0.656376	0.135144	0.202787	0.111341	0.185486	0.19397	0.0838368	0.925653	0.042665	0.882686
17	Ishikawa	21	Medicaments	3.74372	0	0	0	0.382001	0	0	0.0225124	0	0	0	0	0	0	0	0	0	0	0	0.115419	25.4384	0	0	0	0	0	0	0	0	0	0	0	0	0	0	0	0	0	0	0	0	0	0	0	0	0
17	Ishikawa	22	Petroleum refinery products	0	0	0	0	0	0	0	0	0	0	0	0	0	0	0	0	0	0	0	0	0	0	0	0	0	0	0	0	0	0	0	0	0	0	0	0	0	0	0	0	0	0	0	0	0	0
17	Ishikawa	23	Coal products	0	0	0	0	0	0	0	0	0	0	0	0	0	0	0	0	0	0	0	0	0	0	0	0	0	0	0	0	0	0	0	0	0	0	0	0	0	0	0	0	0	0	0	0	0	0
17	Ishikawa	24	Plastic products	11.7044	0	0.0121414	0.0544407	33.9895	19.3793	0.0357224	3.44835	1.65243	10.114	4.38628	20.0433	9.5252	0.904732	5.32732	0	0.0406339	0	0.0509902	12.4007	20.9644	0	0	267.002	18.1976	5.73903	0.107344	0.0854797	0.663729	0	0	0.0398246	0	0.329046	5.25905	0.363239	1.79846	1.61677	2.55851	2.68913	3.19707	7.86813	1.73382	86.4093	4.82158	90.0349
17	Ishikawa	25	Rubber products	0.341585	0	0.046692	0.0264553	0.0979605	0.00745989	0.000769622	0.234519	0.0148129	0.0779473	0.056658	0.11649	0.0249338	0.015948	0.0150255	0	0.020135	0.00845772	0	0.0678996	0.131072	0	0.0098232	0.106037	3.74397	0.00086986	0.0206856	0	0.0896528	0.00227443	0.0195389	0.06006	0.00177505	0.00620298	0.0131095	0.102714	0.0977783	0.577932	1.50734	0.225211	0.212368	0.372409	0.129202	0.446267	0.139836	1.9079
17	Ishikawa	26	Glass and glass products	0.0267601	0	0	0	0.443637	3.18154	0.00259929	0.0490547	0.0058857	2.17394	0	0	0	0	0.313434	0	0.03548	0	0	0.430332	1.73931	0	0	1.35931	0.0717989	3.55478	0.0182251	0	0.114649	0	0	0	0	0	0.213471	0.027463	0.188089	0.0413173	0.0339956	0	0.0597704	0.0134664	0.0766231	4.40514	0.0836606	0.400409
17	Ishikawa	27	Cement and cement products	0.000552461	0	0	0.00228986	0	0	0	0	0	0	0	0	0	0	0	0	0	0	0	0.000526037	0	0	0.00123287	0	0	0	2.91448	0	0.0245795	0	0	0	0	0	0	0	0.0101375	0	0	0	0	0	0	0.001043	0	0
17	Ishikawa	28	Pottery, china and earthenware	0	0	0	0	0.315273	0.0670718	0	0	0	1.33618	0	0	0	0	0.250321	0	0	0	0	0.0508737	0	0	0	0.109604	0	0.00879852	0.0909706	0.71282	0	0	0	0.00867855	0	0	0	0	0.111802	0.0170677	0.0424223	0	0.00795584	1.44383	0.0233368	0.50435	0.0161649	1.6598
17	Ishikawa	29	Other ceramic, stone and clay products	1.74365	0	0	0.014524	0.0595497	0.00527864	0	0	0.0194218	0.107118	0.428769	0.00237775	0.00256111	0.0282121	5.15874	0	0.0529639	0.0881383	0	0.229553	0.332761	0	0.437908	0.197165	0.0561977	5.31251	3.13013	0.506267	6.59361	0.263136	0.011312	2.71566	0	2.45907	0.530738	0.359768	1.20478	3.12441	0.526177	0.843507	0.0200363	1.03347	0.188561	4.33448	0.0788761	2.01755
17	Ishikawa	30	Pig iron and crude steel	0	0	0	0	0	0	0	0	0	0	0	0	0	0	0	0	0	0	0	0	0	0	0	0	0	0	0	0	0	0	0	0	0	0	0	0	0	0	0	0	0	0	0	0	0	0
17	Ishikawa	31	steel products	0.0044331	0	0.00390087	0.0212013	0	0	0	0.000823317	0.00877527	0.394726	0	0	0	0	0	0	0	0	0	0	0	0	0	0.106429	0.117769	0	0.402712	0	0.0384351	0	2.01901	1.99604	3.29339	0.0076085	0.0239386	2.26147	6.46259	1.47354	1.31588	1.58224	0.0493557	0.954152	0.0607696	1.11022	0.192207	1.2174
17	Ishikawa	32	Cast and forged steel products	0	0	0	0.00768973	0	0	0	0	0	0.235154	0	0	0	0	0	0	0	0	0	0	0	0	0	0	0	0	0.0227435	0.130399	0.117393	0	0	2.43732	0	0	0.173651	6.60183	8.29228	16.9546	19.5221	17.8492	0.795615	7.99247	0.797372	3.04023	0.161655	1.71414
17	Ishikawa	33	Other iron or steel products	0	0	0	0	0	0	0	0	0.00234788	2.17881	0	0	0	0	0.0785921	0	0.00117945	0	0	0.00564687	0	0	0	0.00938502	0	0	0.181755	0.00578937	0.0985058	0	0	0.246219	0	0	0.0454168	4.5655	14.9215	1.6698	2.06245	0.415023	0.083716	1.06471	0.00207227	2.00639	0.583495	0.69392
17	Ishikawa	34	Non-ferrous metals	0	0	0	0	0	0	0	0	0	0	0	0	0	0	0	0	0	0	0	0	0	0	0	0	0	0	0	0	0	0	0	0	0	0	0	0	0	0	0	0	0	0	0	0	0	0
17	Ishikawa	35	Non-ferrous metal products	0	0	0	0.0543224	6.23398	0.422281	0	0	0.230606	3.40382	0	0.271736	0.532167	0	1.19297	0	0	0	0	1.10371	0.767611	0	0	1.89991	1.14118	0.477693	0	0.0398038	0.783225	0	0	0.039738	0	0.656661	29.2492	15.5797	32.6339	12.0911	7.08167	14.4213	0.754597	23.3684	4.14196	100.721	4.59962	66.9145
17	Ishikawa	36	Metal products for construction and architecture	0.0213218	0	0	0.0184116	0	0	0	0	0.0140688	0.278204	0	0	0	0	0	0	0	0	0	0	0	0	0	0	0	0	0.0689764	0	0	0	0	0.01039	0	0	0.00755953	2.57055	0.713862	0.166874	0	0.215947	0	0	0	0	0	0.0570464
17	Ishikawa	37	Other metal products	2.92996	0	2.37473	1.56535	10.6044	54.1196	0	1.69075	5.89023	20.9876	0.904377	0.446975	0.147643	0	10.835	0	4.75805	0.601374	0	6.67683	11.1394	0	0.243037	2.63769	24.1376	2.048	5.06761	0.905394	3.64707	0	0	4.83448	0.00708335	0.519814	1.75624	14.5576	74.8069	25.803	22.2259	15.4467	5.1789	13.9763	5.17423	23.9169	4.67459	86.2424
17	Ishikawa	38	General industrial machinery	0.0715623	0	0.403994	0.0847469	0	0	0	0	0.0101183	0.266781	0	0	0	0	0	0	0	0	0	0	0	0	0.011407	9.41028	0	15.687	0.0104438	0.169658	0.909679	0	0	1.47458	0.0824498	0.0840361	0.184853	0.318065	1.65872	153.121	30.0009	5.60118	3.35205	3.50963	1.82184	1.49579	3.36827	2.34316
17	Ishikawa	39	Special industrial machinery	0	0	0	0	0	0	0	0	0	0	0	0	0	0	0	0	0	0	0	0	0	0	0	0	0	0.509347	0	0	0	0	0	0	0	0	0	0	0	4.14041	428.274	0.0240599	0.0657949	0.0444711	0.0643319	1.59888	0.155964	0
17	Ishikawa	40	Other general machines	0	0	0.130193	0.0180176	0	0	0	0	0.0206516	1.72102	0	0	0	0	0	0	0	0	0	0.036424	0	0	0	0.232361	0	0.0206164	0.00355266	0.156162	0.299129	0	0	0.437209	0	0	0.110967	0.15215	0.446693	5.2657	5.98404	16.3607	0.301377	4.4951	0.686564	0.449732	0.482932	3.96053
17	Ishikawa	41	Machinery for office and service industry	0	0	0	0	0	0	0	0	0	0	0	0	0	0	0	0	0	0	0	0	0	0	0	0	0	0	0	0	0	0	0	0	0	0	0	0	0	0	0	0	10.8332	0	0	0	0	0
17	Ishikawa	42	Industrial electric equipment	0.125006	0	0.00649991	0	0	0	0	0	0.00618623	0.0466018	0	0	0	0	0	0	0	0	0	0	0	0	0	0.00549506	0	0	0	0	0	0	0	0	0	0	0.00664804	0.33423	0.042255	8.16426	12.2678	0.25117	1.96564	44.1208	3.99128	2.84383	2.59259	29.0194
17	Ishikawa	43	Applied electric equipment and electric mesuring instruments	0	0	0	0	0	0	0	0	0	0	0	0	0	0	0	0	0	0	0	0	0	0	0	0	0	0	0	0	0	0	0	0	0	0	0	0	0	0.134523	0.68958	0.0416531	0.0701843	0.19714	2.14871	0	0	0.0712075
17	Ishikawa	44	Other electric equipment	0.0878896	0	0.00217617	0	0.0296352	0	0	0	0	0.0799617	0	0	0	0	0.00630262	0	0	0	0	0.0298878	0.00210508	0	0	0.00367949	0	0	0	0	0	0	0	0	0	0	0.00445153	0	0.127323	0.0621682	0.291097	0.0799897	0.140219	0.688066	0.457005	20.0793	0.436848	7.45941
17	Ishikawa	45	Household electric and electric applications	0	0	0	0	0	0	0	0	0	0	0	0	0	0	0	0	0	0	0	0	0	0	0	0.000190677	0	0	0	0	0	0	0	0	0	0	0	0	0	0	0	0	0	0	0	0	0.363589	0
17	Ishikawa	46	Communication equipment	4.16335e-06	0	0	0	0	1.56793e-05	0	3.35062e-06	0	3.88019e-06	3.47974e-06	0	3.80367e-06	0	4.17979e-06	0	0	0	0	0	0.000134021	0	0	3.66027e-06	2.27626e-05	8.22725e-06	4.2532e-06	0	0	0	0	4.05754e-06	0	1.95562e-05	4.42827e-06	8.09566e-06	8.04174e-06	0.000127677	3.96679e-05	4.0806e-06	0	0	7.63756e-05	3.14403e-05	3.77883e-06	0.0461897
17	Ishikawa	47	Electric computing equipment and accessory equipment	0	0	0	0	0	0	0	0	0	0	0	0	0	0	0	0	0	0	0	0	0	0	0	0	0	0	0	0	0	0	0	0	0	0	0	0	0	0	0.658509	0	0	0	0	0	0	0.120142
17	Ishikawa	48	Semiconductor devices and integrated circuits	0	0	0	0	0	0	0	0	0	0	0	0	0	0	0	0	0	0	0	0	0	0	0	0	0	0	0	0	0	0	0	0	0	0	0	0	0.211411	0.098721	1.04693	0.366	4.57104	5.92517	23.0706	0.854901	5.3567	173.906
17	Ishikawa	49	Other electrical equipment	0	0	0	0	0.0234599	0.00727841	0	0	0	0	0	0.0131142	0.381388	0	0	0	0	0	0	0	0.0155534	0	0	0.00679648	0	0	0	0	0	0	0	0	0	0	0.197341	0	1.41855	2.88192	3.94062	0.469772	12.8603	13.5707	71.9684	1.65651	13.3176	595.766
17	Ishikawa	50	Passenger motor cars	0	0	0	0	0	0	0	0	0	0	0	0	0	0	0	0	0	0	0	0	0	0	0	0	0	0	0	0	0	0	0	0	0	0	0	0	0	0	0	0	0	0	0	0	0	0
17	Ishikawa	51	Other cars	0	0	0	0	0	0	0	0	0	0	0	0	0	0	0	0	0	0	0	0	0	0	0	0	0	0	0	0	0	0	0	0	0	0	0	0	0	0	0	0	0	0	0	0	0	0
17	Ishikawa	52	Motor vheicle parts and accessories	0	0	0	0	0	0	0	0	0	0	0	0	0	0	0	0	0	0	0	0	0	0	0	0	0	0	0	0	0	0	0	0	0	0	0	0	0	0	0.197282	0	0	0	0	0	0	0
17	Ishikawa	53	Other transportation equipment	7.50961	0	0.0066126	0	0	0	0	0	0	0	0	0	0	0	0	0	0	0	0	0	0	0	0	0	0	0	0	0	0	0	0	0	0	0	0	0	0	0	0	0	0	0	0	0	0	0
17	Ishikawa	54	Precision instruments	0.0223809	0	0	0.000644202	0.00503101	0	0	0.00050033	0.000615315	0.000579408	0.00675493	0.00105463	0	0	0.00312073	0	0	0	0	0.000591955	0.00375238	0	0	0.0109314	0.001133	0	0.000635108	0.00182068	0.000614658	0	0	0.00060589	0	0	0	0.00181332	0.00120083	0.137032	0.485719	0.00243734	0.0277717	0.0799647	0.0336712	0.00176055	0.00112854	1.41327
17	Ishikawa	55	Miscellaneous manufacturing products	1.24228	0	0.470349	0.0874842	0.939433	1.26614	0	9.75025	0.781895	4.24337	0.0907256	0.0613806	0.0165286	0.0121381	0.00605433	0	0.0659635	0	0	0.103357	0.00606646	0	0.040373	0.20677	0.0274758	1.00103	0.0246426	0.500393	0.810872	0	0	1.42817	0	0.00708167	0.75688	0.152443	0.209669	2.0632	0.0976786	0.0354639	0	0.0873996	0.18438	0.142314	0.0218942	2.36103
17	Ishikawa	56	Reuse and recycling	0.0477278	0	0	0	0.0182679	1.1987	0	0	0	0	0.801054	0	0	0.354404	0.248647	0	0.056439	0	0	0	0	0	0	2.57434	0.0176314	0.527657	0.125189	0.0491103	0.0726949	0.185511	0.00260261	1.45453	0.0494159	2.10707	3.5357	0	0.00249159	0	0	0	0	0	0	0.0146118	0	0
17	Ishikawa	57	Building construction and repair of construction	0	0	0	0	0	0	0	0	0	0	0	0	0	0	0	0	0	0	0	0	0	0	0	0	0	0	0	0	0	0	0	0	0	0	0	0	0	0	0	0	0	0	0	0	0	0
17	Ishikawa	58	Public construction	0	0	0	0	0	0	0	0	0	0	0	0	0	0	0	0	0	0	0	0	0	0	0	0	0	0	0	0	0	0	0	0	0	0	0	0	0	0	0	0	0	0	0	0	0	0
17	Ishikawa	59	Other civil enginnering and construction	0	0	0	0	0	0	0	0	0	0	0	0	0	0	0	0	0	0	0	0	0	0	0	0	0	0	0	0	0	0	0	0	0	0	0	0	0	0	0	0	0	0	0	0	0	0
17	Ishikawa	60	Electricity	5.81243	0	0.895295	1.44385	11.4421	2.52772	0.385007	1.50786	2.46514	1.29399	11.7728	1.28528	1.34576	1.27458	14.1388	0	4.47095	0.706255	0.399904	3.34529	1.91732	0	0.363699	10.533	6.44825	5.95444	1.15148	0.28419	4.30017	0.561397	0.318785	13.4658	0.45653	10.9542	5.8303	1.12733	10.3091	2.58245	2.3731	2.58263	0.789172	1.46724	0.428197	7.79788	0.43587	4.23395
17	Ishikawa	61	Gas supply and heat supply	0.000715631	0	0.000248069	0.000494363	0.169393	0.0927557	0.00521336	0.00287966	0.00118049	0.00422408	0.0173457	0.0101166	0.000217935	0.031929	0.0385572	0	0.0163672	0.00875005	0.00062509	0.0277104	0.041994	0	0.00106467	0.0530589	0.0330399	0.299568	0.0029243	0.0132734	0.0176884	0.00123255	0.00746001	0.101594	0.000480963	0.00644284	0.0870268	0.0143794	0.0737217	0.0109731	0.0125005	0.00724788	0.00213121	0.0153413	0.00416764	0.168431	0.000433025	0.0544616
17	Ishikawa	62	Water supply and waste management services	0.00186588	0	0.000572876	0.000340654	0.0131672	0.00576376	0.000528181	0.000400437	0.000606787	0.000546536	0.00912682	0.000979724	0.000470817	0.00151118	0.00785873	0	0.00452367	0.00354628	0.000201786	0.00560063	0.00696279	0	7.93122e-05	0.00381201	0.00176501	0.00256348	0.00288645	0.000156126	0.00295164	7.65153e-05	0.000304756	0.00142879	0.000197061	0.00305713	0.00224922	0.000656534	0.0024456	0.0025034	0.00338627	0.00115824	0.000214332	0.000941642	0.000357038	0.00488136	0.000225807	0.00397787
17	Ishikawa	63	Commerce	85.5624	0	2.55455	0.785699	251.382	22.2073	1.85709	36.3513	29.386	34.9482	59.3988	35.16	15.4463	4.08662	27.3857	0	24.3644	7.54163	0.487154	35.0367	30.6366	0	4.64975	103.42	57.8613	26.1349	13.4372	1.89637	14.1321	0.323786	2.1873	22.0898	10.1394	34.3948	29.6135	20.4041	52.3681	37.6298	38.6777	19.519	11.2084	27.7907	21.4641	85.1862	10.3801	224.803
17	Ishikawa	64	Financial and insurance	0.1339	0	0.0267924	0.00994997	0.140618	0.0255918	0.00676708	0.0628211	0.0269323	0.0340345	0.030596	0.0262883	0.0150081	0.00987176	0.0428914	0	0.0218879	0.0121536	0.000645184	0.0651262	0.0328721	0	0.00105494	0.0297677	0.0401955	0.053364	0.0363102	0.0038937	0.0218208	0.000559754	0.0025931	0.0193787	0.00503374	0.0728604	0.0627566	0.025968	0.043258	0.0323068	0.0333303	0.0271338	0.00308841	0.0120163	0.00807844	0.068023	0.00455883	0.123711
17	Ishikawa	65	Real estate agencies and rental services	3.73319e-05	0	4.10624e-05	6.99282e-05	0.000259987	0.000102065	6.27605e-06	9.12885e-05	3.76596e-05	0.000127797	9.42063e-05	9.25586e-05	7.01811e-05	2.02302e-05	0.000131898	0	9.85173e-05	4.38902e-05	3.76254e-06	0.000106639	0.000271548	0	1.04137e-05	0.000248681	0.000107287	0.000183012	9.5344e-05	9.81168e-06	5.03958e-05	1.23649e-06	6.51822e-06	8.25617e-05	9.40878e-06	9.8638e-05	6.18519e-05	0.000128432	0.000223259	9.35695e-05	0.000107392	7.88091e-05	1.4111e-05	6.17783e-05	4.64089e-05	0.000540118	1.95485e-05	0.000753591
17	Ishikawa	66	House rent	0	0	0	0	0	0	0	0	0	0	0	0	0	0	0	0	0	0	0	0	0	0	0	0	0	0	0	0	0	0	0	0	0	0	0	0	0	0	0	0	0	0	0	0	0	0
17	Ishikawa	67	Transport	40.6001	0	8.99693	0.816951	33.1844	4.95899	0.279662	2.87986	7.28066	4.04212	6.46091	4.36077	2.43078	0.807515	4.94566	0	2.66831	1.13437	0.0977249	4.45922	5.2897	0.00201555	0.988929	8.771	4.33757	4.60483	10.6097	0.307173	4.44358	0.0843032	0.398556	4.23879	1.20719	17.833	5.17273	4.30003	9.1168	4.27869	3.84752	2.79109	0.826201	2.58104	1.36522	10.4521	0.653708	15.4578
17	Ishikawa	68	Communication	0.114532	0	0.0245773	0.0626362	0.187116	0.0671812	0.00794631	0.113023	0.0310383	0.0855632	0.0668562	0.0663056	0.0602079	0.0109775	0.116353	0	0.0298282	0.0146866	0.00158796	0.0835214	1.29982	0	0.0101424	0.193393	0.271265	0.0925071	0.0482872	0.00576776	0.0503272	0	0.00641894	0.0748569	0.00366546	0.233232	0.122303	0.191776	0.197961	0.249138	0.155459	0.124728	0.0267996	0.0946867	0.0790081	0.303747	0.0268135	0.612858
17	Ishikawa	69	Broadcasting	0	0	0	0	0	0	0	0	0	0	0	0	0	0	0	0	0	0	0	0	0	0	0	0	0	0	0	0	0	0	0	0	0	0	0	0	0	0	0	0	0	0	0	0	0	0
17	Ishikawa	70	Information services	1.16018	0	0.0362679	0.0554117	2.55415	1.09232	0.0182927	0.267574	0.269237	0.821249	0.557713	0.396386	0.280388	0.217608	0.445832	0	0.545625	0.278189	0.0121851	0.65086	4.02286	0	0.0389137	1.79469	1.23515	0.820117	0.425159	0.0953264	0.641341	0.0180199	0.0727104	0.530226	0.147666	1.11942	1.05101	0.526697	2.26566	1.36585	2.30164	0.795302	0.234727	1.67007	2.0615	5.30903	0.107624	9.32876
17	Ishikawa	71	﻿Internet based services	0.000736964	0	0.000255464	0.000381825	0.00708208	0.00358492	0.000214751	0.0037563	0.00145881	0.00343421	0.00133457	0.00145854	0.00258097	0.000247224	0.00308281	0	0.000977106	0.000321817	0	0.0022221	0.0359558	0	0.00013705	0.00982666	0.00526041	0.00303401	0.00150574	0.000119904	0.00121438	0	0.000123909	0.00299264	0.000123825	0.0077888	0.00404993	0.00537387	0.0074733	0.00612092	0.00514925	0.00240772	0.000548685	0.00400528	0.00332621	0.0136814	0.000891866	0.0301238
17	Ishikawa	72	Image information production and distribution industry	0.0619785	0	0.029004	0.0267595	0.227791	0.0213961	0.0216726	0.231109	0.0306714	0.123228	0.0889263	0.114778	0.0339744	0.179846	0.150373	0	0.0318426	0.017141	0.00180457	0.11016	0.486314	0	0.0103733	0.224314	0.356743	0.234747	0.128743	0.0242013	0.135832	0.000889557	0.0041683	0.0583899	0.00833092	0.0982554	0.0527378	0.0903882	0.432969	0.146511	0.163378	0.0698587	0.0396841	0.122574	0.111893	0.640632	0.0337526	1.26855
17	Ishikawa	73	Public administration	0	0	0	0	0	0	0	0	0	0	0	0	0	0	0	0	0	0	0	0	0	0	0	0	0	0	0	0	0	0	0	0	0	0	0	0	0	0	0	0	0	0	0	0	0	0
17	Ishikawa	74	Education and Research	0.0252821	0	0.00290432	0.0211713	0.60977	0.122476	0.00411192	0.0447156	0.0071286	0.0835651	0.05209	0.0517404	0.00402871	0.107248	0.575522	0	0.235325	0.117463	0.0102714	0.721067	3.17038	0	0.00738046	0.818527	0.710019	0.744613	0.142053	0.0342943	0.227	0.00379744	0.0170527	0.0809382	0.000296366	0.182794	0.299083	0.12076	0.156581	0.299198	0.440176	0.104305	0.121869	0.635362	0.623529	2.85412	0.20559	4.08907
17	Ishikawa	75	Medical service, health and social security and nursing care	0.000343568	0	0.00018579	0.000206485	0.00291933	0.000963945	3.00347e-05	0.00071337	0.000190425	0.000243353	0.000603026	0.000308898	0.000175777	0.000124475	0.000724343	0	0.000321143	0.000126025	2.4008e-05	0.000726241	0.00285479	0	5.36694e-05	0.00108135	0.0013775	0.000468462	0.000400121	4.02469e-05	0.000217397	5.91735e-06	3.46595e-05	0.000562526	0.000110835	0.000387317	0.000226567	0.000507734	0.00141351	0.00139604	0.000818371	0.00129308	0.000214867	0.00046681	0.000204087	0.00128429	8.73144e-05	0.00291085
17	Ishikawa	76	Advertising and survery	0.0566642	0	0.0392846	0.0208347	6.87213	2.22577	0.00958756	0.218697	0.06935	0.431	0.709382	1.00569	0.0400791	0.0643845	0.357232	0	0.0521052	0.0468276	0.00638646	1.74857	3.8933	0	0.00203954	0.812072	0.848352	0.127627	0.0921214	0.0339031	0.117468	0.00209879	0.0153665	0.111636	0.0135133	0.098023	0.115355	0.15876	0.315404	0.341586	0.342511	0.212	0.117037	0.260497	0.254417	1.20954	0.133831	2.91309
17	Ishikawa	77	Giids rental and leasing services	1.91249	0	0.258514	0.287672	3.42684	0.546677	0.101519	0.554912	0.465138	0.842167	0.624826	0.467874	0.432672	0.0474786	0.934518	0	0.155172	0.204428	0.0126795	0.459573	0.509265	0	0.348235	2.956	1.69807	1.44323	1.91298	0.116907	1.33652	0.0218761	0.0677282	0.944321	0.14451	0.413373	0.997792	0.606871	4.13919	3.05005	3.02547	1.65573	0.380965	3.03736	0.957388	5.25836	0.317856	14.6855
17	Ishikawa	78	Other business services	0.503617	0	0.0548961	0.0496175	0.965479	0.140716	0.00767242	0.20151	0.113691	0.132077	0.103991	0.118451	0.156475	0.0341614	0.335084	0	0.0927916	0.036409	0.00315664	0.154723	0.338872	0	0.0226099	0.62545	0.543824	0.502576	0.267132	0.0100796	0.178522	0.00177835	0.00911425	0.278868	0.0107995	0.25781	0.225001	0.22625	0.393643	0.363523	0.265007	0.131941	0.0526973	0.209151	0.173856	0.641576	0.0599788	1.16303
17	Ishikawa	79	Personal services	0.0875767	0	0.00227685	0	0.0686565	0.0175215	0	0.0140962	0.0108348	0.0091823	0.0137244	0.00742822	0.00600081	0.00220341	0.0208816	0	0.00544284	0.00478037	0	0.0104235	0.0209235	0	0	0.0317601	0.0219456	0.011898	0.010065	0.00106865	0.00216465	0	0	0.00746821	0.0022072	0.0282815	0.0232873	0.00745034	0.0285456	0.0167856	0.0156454	0.00965656	0.00489021	0.0178487	0.00860664	0.059935	0.00198721	0.0878665
17	Ishikawa	80	Activities not elsewhere classified	0	0	0	0	0	0	0	0	0	0	0	0	0	0	0	0	0	0	0	0	0	0	0	0	0	0	0	0	0	0	0	0	0	0	0	0	0	0	0	0	0	0	0	0	0	0
18	Fukui	1	Agriculture, forestry and fishery	66.842	0	0.00159046	0.0301106	188.272	4.90296	0.0147069	0.0332326	21.0753	0.00142537	0	0.00259445	0	0.01847	0.139724	0	0.240288	0	0	0.196593	0.487707	0	0.0221844	0	13.0457	0	0	0	0.0272176	0	0	0	0	0	0.00488012	0	0	0	0	0	0	0	0	0	0	0
18	Fukui	2	Metallic ores	0	0	0	0	0	0	0	0	0	0	0	0	0	0	0	0	0	0	0	0	0	0	0	0	0	0	0	0	0	0	0	0	0	0	0	0	0	0	0	0	0	0	0	0	0	0
18	Fukui	3	Non-metallic ores	0	0	0	0	0	0	0	0	0	0	0	0	0	0	0	0	0	0	0	0	0	0	0	0	0	0	0	0	0	0	0	0	0	0	0	0	0	0	0	0	0	0	0	0	0	0
18	Fukui	4	Coal mining, crude petroleum and natural gas	0	0	0	0	0	0	0	0	0	0	0	0	0	0	0	0	0	0	0	0	0	0	0	0	0	0	0	0	0	0	0	0	0	0	0	0	0	0	0	0	0	0	0	0	0	0
18	Fukui	5	Food and Tobacco	53.9172	0	0	0	148.982	12.2624	0	0.600891	0.0112308	0	0.720783	0.00192493	0	0.0159875	0.0797439	0	0.464881	0.00396407	0	0.635301	2.61856	0	0	0.0339185	0	0.0695123	0	0.00886168	0.179501	0	0	0.00221176	0	0	0	0	0	0	0	0	0	0	0	0	0	0
18	Fukui	6	Beverage	0.332005	0	0	0	0.53698	0.824399	0	0	0	0	0	0	0	0	0	0	0.00362794	0	0	0	0.0165157	0	0	0	0	0	0	0	0	0	0	0	0	0	0	0	0	0	0	0	0	0	0	0	0	0
18	Fukui	7	Textile products	32.7179	0	0	0	3.83218	0.0810634	59.6125	1525.95	1.44869	39.6405	24.899	114.437	1.57323	2.51285	0	0	0	0	0.676859	0.163963	0	0	0	10.446	165.073	2.89243	0.087958	0	5.78856	0	0	0.167823	0	0	5.03681	0.418554	5.1555	0.742614	1.55866	0.0843885	0	0	0	69.6525	12.8944	33.9396
18	Fukui	8	Wearing aparel and other textile products	10.4585	0	0.792229	0.236818	5.99978	0.635275	0.161736	8.97746	1.18485	1.40985	1.34621	1.04309	0.139199	0.613341	0.480742	0	0.400411	0.0665333	0	0.787546	1.37943	0	0.850024	0.641051	1.32886	3.05385	0.644835	0.254975	1.4203	0	0.0219577	0.997	0.109714	0.230039	1.20385	0.476146	2.23874	1.17854	0.75695	1.33333	0.165293	1.46882	0.741541	1.6437	0.50377	6.07581
18	Fukui	9	Timber and wooden products	2.63181	0	0.0447939	0.0312435	1.44658	0.279824	0	0.100529	33.5472	29.8192	0.00720024	0.814732	0.00787052	0.0043349	0	0	0.00428322	0.00752379	0	0.0943313	0	0	0	0.310525	0.011775	1.10654	0.0616048	0.61391	0.702679	0	0	0.705249	0	0	1.4844	0.209393	1.02751	0.0825585	0.110809	0.0422177	0.103905	0.109246	0.0376276	0.443194	0.0351861	0.948839
18	Fukui	10	Furniture and fixtures	0.103883	0	0.165648	0.172232	2.92133	0.14345	0.0181629	0.585228	0.0959633	16.2589	0.295208	0.323082	0.101236	0.0487886	0.493656	0	0.158394	0.0786304	0	0.560515	1.13559	0	0.00772751	1.51608	0.523792	0.0752712	0.1698	0.182539	0.328666	0	0.0279462	0.587209	0	0.0325309	0.309382	0.0740673	0.387935	0.285391	0.237549	0.190061	0.0494997	0.257202	0.314594	1.85009	0.213721	21.6916
18	Fukui	11	Pulp, paper, paperboard, building paper	0.378517	0	0	0	8.63039	0.0570201	0.0198539	0.286349	1.67087	4.64955	183.283	113.063	33.3298	0	3.0933	0	0	1.48101	0	6.37931	1.34032	0	0	5.6173	2.0419	7.69685	0	0.620774	3.77978	0	0	0	0.0381592	0	0.821309	0.0294412	0.285139	0.166864	0.00721294	0.652949	0	4.61494	0.0925841	6.22425	0.336687	6.52866
18	Fukui	12	Paper products	25.2916	0	0	0	40.007	13.4537	0.0821114	1.63783	0.0929644	3.66498	0.418693	6.06547	0.286043	0.636487	1.69738	0	0.37983	0.103908	0.0492264	7.3456	13.581	0	0.00698695	3.52332	0.370888	10.914	0.0575729	1.77883	1.28154	0	0	0	0.151505	0	0.499522	0.0060881	2.98749	0.618099	0.107392	0.576914	0.234969	0.782739	0.388377	4.56324	0.875261	8.47728
18	Fukui	13	Publishing, printing	0.10088	0	0.0273674	0.0409042	20.0632	1.06955	0.072852	1.75788	0.15628	1.51657	0.146636	4.98516	9.32869	0.0882824	0.634092	0	0.0654223	0.0881047	0.0268182	4.33918	1.55752	0	0.014682	0.362473	0.407667	2.38354	0.0940958	0.0556621	0.260189	0.00377713	0.0176989	0.688214	0.00442172	0.180272	0.363885	0.123668	1.41906	0.60108	0.89849	0.47718	0.963988	0.313863	0.463613	1.42012	0.883783	18.4865
18	Fukui	14	Chemical fertilizer	0	0	0	0	0	0	0	0	0	0	0	0	0	0	0	0	0	0	0	0	0	0	0	0	0	0	0	0	0	0	0	0	0	0	0	0	0	0	0	0	0	0	0	0	0	0
18	Fukui	15	Basic inorganic chemical products	0.520325	0	0.00741236	0	7.70041	1.53677	0.909734	1.35951	0.00705464	0.132859	2.99656	0.447383	0.00651196	9.2894	95.9247	0	19.6756	1.96713	0.0373557	32.8482	18.0762	0	0.0318125	6.53591	49.9725	19.0221	0.145631	0.709725	0.662429	0.147315	0.0719054	0.514047	0.0287425	1.88329	0.697478	1.44143	1.28727	0.314216	0.27844	0.670663	0.0509448	0.510052	0.398496	21.544	0.0905721	6.63007
18	Fukui	16	Basic organic chemical products	0	0	0	0	0.0217014	0	0	0	0	0	0.00965506	0.00139975	0.0105539	0.403577	2.53322	0	7.4354	1.01754	0.00864885	1.15493	0.0713844	0	0	0.00435256	0.0345867	0.105986	0	0	0.0130528	0	0	0	0	0	0	0	0	0.00632604	0	0	0	0	0	0	0	0
[truncated: 2,388 more rows]
[truncated: 434 more columns]
