# Supplementary material for: Carbon footprint analysis through constructing a multi-region input–output table: a case study of Japan
Source: Springer Nature journal article supplement (doi:10.1186/s40008-015-0015-6), 2015-06-17
Supplement: MOESM3 [file 11901238]

## Sheet: MRIO_Japan (Tokyo-Fukui)
2005 MRIO of Japan (47 regions)				13	13	13	13	13	13	13	13	13	13	13	13	13	13	13	13	13	13	13	13	13	13	13	13	13	13	13	13	13	13	13	13	13	13	13	13	13	13	13	13	13	13	13	13	13	13
Part 3				Tokyo	Tokyo	Tokyo	Tokyo	Tokyo	Tokyo	Tokyo	Tokyo	Tokyo	Tokyo	Tokyo	Tokyo	Tokyo	Tokyo	Tokyo	Tokyo	Tokyo	Tokyo	Tokyo	Tokyo	Tokyo	Tokyo	Tokyo	Tokyo	Tokyo	Tokyo	Tokyo	Tokyo	Tokyo	Tokyo	Tokyo	Tokyo	Tokyo	Tokyo	Tokyo	Tokyo	Tokyo	Tokyo	Tokyo	Tokyo	Tokyo	Tokyo	Tokyo	Tokyo	Tokyo	Tokyo
				1	2	3	4	5	6	7	8	9	10	11	12	13	14	15	16	17	18	19	20	21	22	23	24	25	26	27	28	29	30	31	32	33	34	35	36	37	38	39	40	41	42	43	44	45	46
			Million yen	Agriculture, forestry and fishery	Metallic ores	Non-metallic ores	Coal mining, crude petroleum and natural gas	Food and Tobacco	Beverage	Textile products	Wearing aparel and other textile products	Timber and wooden products	Furniture and fixtures	Pulp, paper, paperboard, building paper	Paper products	Publishing, printing	Chemical fertilizer	Basic inorganic chemical products	Basic organic chemical products	Organic chemical products	Synthetic resins	Synthetic fibers	Final chemical products	Medicaments	Petroleum refinery products	Coal products	Plastic products	Rubber products	Glass and glass products	Cement and cement products	Pottery, china and earthenware	Other ceramic, stone and clay products	Pig iron and crude steel	steel products	Cast and forged steel products	Other iron or steel products	Non-ferrous metals	Non-ferrous metal products	Metal products for construction and architecture	Other metal products	General industrial machinery	Special industrial machinery	Other general machines	Machinery for office and service industry	Industrial electric equipment	Applied electric equipment and electric mesuring instruments	Other electric equipment	Household electric and electric applications	Communication equipment
1	Hokkaido	1	Agriculture, forestry and fishery	271.406	0	0	0	7943.81	220.345	20.5026	0.839218	230.967	0	0.865163	0.483887	0	0	1.25276	0	0.749262	0	0	11.7688	16.2678	0	6.79629	0	1344.4	0	0	0	3.94807	0	0	0	0	0	0.181459	0	0	0	0	0	0	0	0	0	0	0
1	Hokkaido	2	Metallic ores	0	0	0	0	0	0	0	0	0	0	0	0	0	0	29.8572	0	0	0	0	0	0	0	0	0	0	0	0	0	1.15547	0	0	0	0	248.135	0	0	0	0	0	0	0	0	0	0	0	0
1	Hokkaido	3	Non-metallic ores	0	0	1.06943	0	0	0	0	0	0	0	2.81716	0	0	0	9.51829	0	0.166618	0	0	2.74796	0.67618	-2.07526	1.11127	0	3.70976	266.731	90.8075	2.60042	45.1088	0	0	1.73943	0	0.165595	0.10088	0.77402	1.48919	0	0	5.13744	0	0	0	0	0	0
1	Hokkaido	4	Coal mining, crude petroleum and natural gas	0	0	0	0	0	0	0	0	0	0	0.0847323	0.00802588	0	0.0148832	0.00577184	0	0.00745648	0	0	0.0221228	0.00168113	8.38302	0	0	0.00651055	0.0475023	0.353737	0.00431014	0.0579569	0	0.200988	0.00144153	0	0.0074107	0.00100324	0.00192438	0	0	0	0.00340608	0	0	0	0	0	0
1	Hokkaido	5	Food and Tobacco	61.3177	0	0	0	13961.1	387.199	0	12.0862	0.09657	0	0.554799	0	0	0	0.117155	0	0.0840833	0	0	62.3377	13.4787	0	0	0.16676	0	0	0	0	0.458336	0	0	0	0	0	0	0	0	0	0	0	0	0	0	0	0	0
1	Hokkaido	6	Beverage	0.601977	0	0	0	2.03807	9.17209	0	0	0	0	0	0	0	0	0	0	0.00673646	0	0	0	0.00683459	0	0	0	0	0	0	0	0	0	0	0	0	0	0	0	0	0	0	0	0	0	0	0	0	0
1	Hokkaido	7	Textile products	0.015362	0	0	0	0	0.000291164	0.138287	2.06286	0	0.0340963	0.00247313	0.0157979	0.0271674	0	0	0	0	0	0	0.000247889	0	0	0	0.00938991	0.143241	0.00062713	0	0	0.00372781	0	0	0	0	0	0.000764421	0.000366571	0.0020517	0.00124344	0.0261144	0	0	0	0	0.000138461	0.00234707	0.00367302
1	Hokkaido	8	Wearing aparel and other textile products	6.19968	0	0.019217	0	16.7396	0.394159	1.53635	7.67366	0.427128	1.28215	0.137051	3.14277	2.39405	0	0.0992254	0	0.031651	0	0	1.93888	0.369289	0	0.738847	0.455101	0.974161	0.256038	1.1129	0	0.575096	0	1.23634	0.123909	0.389519	0.0157283	0.182052	0.422722	1.55589	2.35348	1.37947	1.88677	1.30861	4.08695	2.25718	0.319341	0.0962821	5.98517
1	Hokkaido	9	Timber and wooden products	4.73257	0	0	0	22.8457	0.994842	0	1.63575	186.334	373.697	44.9747	145.174	2.10966	0	0	0	0	0	0	2.22332	0	0	0	2.40624	0.0882794	3.7881	0.169287	0.467544	1.89832	0	0	1.6419	0	0	3.5913	4.38371	9.52947	2.12427	2.48959	0.831321	10.5479	2.20703	2.4721	0.650499	0.0911296	2.82372
1	Hokkaido	10	Furniture and fixtures	0.0706732	0	0	0	5.89366	0.204275	0.0668332	1.17815	0.050866	39.3645	0.0730568	1.78766	3.15743	0	0.0925634	0	0.0885778	0	0	2.46957	0.359472	0	0	1.93241	0.551053	0.0628545	0.611783	0.0192005	0.362126	0	0.728418	0.15412	0	0	0.0804453	0.102871	0.5038	0.654277	1.43953	0.500715	0.551305	0.865425	1.35362	0.155426	0.0898176	8.32344
1	Hokkaido	11	Pulp, paper, paperboard, building paper	0.240532	0	0	0	13.3725	0.278094	1.97134	0.562771	3.98174	30.1712	357.799	1098.07	1066.49	0	3.36036	0	0	0.423958	0	32.6731	0.30586	0	0	9.86526	2.76386	1.3691	0	0	4.38213	0	1.23956	0	0.967847	0	0.547581	0	0.24495	0.296905	0	0.929537	0	20.2199	0.30713	0.264492	0.203792	8.77037
1	Hokkaido	12	Paper products	0.91078	0	0	0	30.4302	2.81327	0.0485638	0.360459	0.00978388	1.34877	0	1.09115	1.41214	0.00566787	0.0751734	0	0.0113584	0	0	18.7597	0.858527	0	0	0.512485	0.137605	0.364307	0.213953	0.0320073	0.054175	0	0	0	0.0182327	0	0.00343852	0	0.447604	0.145424	0.0125858	0.128414	0.156537	0.218949	0.225648	0.0747392	0.0345522	0.779839
1	Hokkaido	13	Publishing, printing	0.0639633	0	0.00154521	0	45.2056	0.936728	0.0403253	2.00787	0.0460366	1.32306	0.00367337	15.0432	604.871	0	0.117906	0	0	0	0	15.2155	0.280157	0.0052831	0.0118819	0.132496	0.215827	0.424756	0.0894867	0	0.0728323	0	0.256379	0.100741	0.0190648	0.00442643	0.0701111	0.144829	1.60674	1.39486	1.24364	0.567614	4.3085	0.555103	1.43382	0.0547049	0.204731	8.04888
1	Hokkaido	14	Chemical fertilizer	52.0183	0	0	0	0	0.278434	0	0	0	0	0	0	0	3.61482	12.4064	0	1.96194	0.212238	0	21.5716	6.27779	0	0	0	0	0	0	0	0.137109	0	14.2724	0	0	0	0	0	0	0	0	0	0	0	0	0.132407	0	0
1	Hokkaido	15	Basic inorganic chemical products	0	0	0	0	7.01778	0.210805	0.348681	0.003555	0	0.0302524	0.0910991	0.245974	0.0264908	0.0608181	5.39702	0	0.620823	0.0107125	0	24.4802	3.70191	0	0	1.34457	4.72395	1.18052	0.191315	0	0.0173011	0	1.8636	0.0198808	0.0081518	0.00757069	0.00922412	0.203474	0.167112	0.127537	0.129423	0.172241	0.0745027	0.189078	0.380265	0.163737	0	0.49197
1	Hokkaido	16	Basic organic chemical products	0	0	0	0	0	0	0	0	0	0	0	0	0.663195	0	0	0	0.786646	0	0	10.7085	0.266035	0	0	0	0.0312206	0	0	0	0	0	0	0	0	0	0	0	0	0.0469539	0	0	0	0	0	0	0	0
1	Hokkaido	17	Organic chemical products	0.00860564	0	0	0	0.0808022	0.0143273	0.0254631	0.000134231	0.000743253	0.000685367	0.00332113	0.00139313	0.00950235	0	0.0120225	0	0.132737	0.0085953	0	1.07748	0.22681	0	0.000383664	0.150309	0.194943	0.00175522	0	0	0.000653257	0	0	0	0	7.1464e-05	0.00130607	0.000167017	0.00116849	0.00524046	0.000106235	0.00133026	0.0189244	0.00258228	0.000586046	0.000315429	0.00194432	0.00209188
1	Hokkaido	18	Synthetic resins	0	0	0	0	0	0	0.000582316	0	0	0.00257466	0.00286444	0.0074764	0.00161038	0	0	0	0	0	0	0.514234	0	0	0	0.731723	0	0	0	0	0.000736213	0	0	0	0	0	0.000420551	0	0	0	0	0.000713899	0.00247037	0.0227435	0	0.000914102	0.000939094	0.0204768
1	Hokkaido	19	Synthetic fibers	0	0	0	0	0	0	0	0	0	0	0	0	0	0	0	0	0	0	0	0	0	0	0	0	0	0	0	0	0	0	0	0	0	0	0	0	0	0	0	0	0	0	0	0	0	0
1	Hokkaido	20	Final chemical products	0.49072	0	0.0175167	0	3.50811	0.194763	0.290901	0.402704	0.71692	1.61868	0.458058	7.52909	130.074	0	1.3174	0	0.243262	0	0	63.9256	4.24227	0.0544451	0.428574	2.4851	0.877661	0.0521111	0.357356	0	0.571271	0	0.169851	0.0638884	0.0196473	0	0.0722532	0.170576	1.08897	0.452038	0.420431	0.320783	3.34643	0.557519	0.472281	0.253693	0.0124109	1.32995
1	Hokkaido	21	Medicaments	8.34632	0	0	0	0.482347	0	0	0.00659725	0	0	0	0	0	0	0	0	0	0	0	2.26481	13.5605	0	0	0	0	0	0	0	0	0	0	0	0	0	0	0	0	0	0	0	0	0	0	0	0	0
1	Hokkaido	22	Petroleum refinery products	39.134	0	0.0362837	0	98.9646	0.868249	3.20891	0.536876	0.300279	1.66135	1.12132	3.20815	99.3797	0.104372	8.23291	0	4.39239	0	0	22.1761	0.795781	8.18759	31.388	1.14077	2.94487	8.0147	3.80855	0.362711	3.89546	0	23.8655	0.545892	0	0.363785	0.949791	2.67205	8.75234	4.01691	1.39059	0.967381	0.371947	1.43601	1.27854	2.47734	0	1.82549
1	Hokkaido	23	Coal products	0	0	0	0	0	0	0	0	0	0	0	0	0	0	0	0	0	0	0	0	0	0	0	0	0	0	0	0	0	0	0	0	0	0	0	0	0	0	0	0	0	0	0	0	0	0
1	Hokkaido	24	Plastic products	0.611856	0	0	0	12.4895	1.52182	0.0226906	0.637584	0.0962162	1.57141	0.114274	5.32711	47.3204	0.00643139	0.139174	0	0.00322212	0	0	7.04499	1.11802	0	0	34.6421	2.42231	0.0932855	0.0242775	0	0.040982	0	0	0	0	0.00320234	0.386271	0.164651	0.319402	0.380802	3.32278	0.423892	2.77896	1.93309	1.33603	1.80074	0.11762	10.8924
1	Hokkaido	25	Rubber products	1.73468	0	0.00375278	0	1.55013	0.029934	0.0272044	0.418988	0.0186345	0.257748	0.0178427	0.34928	1.89023	0	0.00753558	0	0.016225	0	0	0.22087	0.093281	0	0.0288571	0.214524	7.2746	0	0.50258	0	0.206365	0	0.733843	0.00941016	0.0115754	0	0.00654905	0.502485	0.36034	4.27183	3.85136	0.689268	5.05881	2.07935	1.82929	0.393832	0.0877446	4.68873
1	Hokkaido	26	Glass and glass products	0.012041	0	0	0	3.10683	8.70089	0	0	0	3.96773	0	0	0.0393623	0	0.115651	0	0	0	0	11.473	1.40865	0	0	1.22716	0.0592967	1.40073	0.0189515	0	0.178238	0	0	0	0	0	0	0.0876342	0.147147	0.163494	0.0222966	0	0.831945	0.0478209	1.62206	0.774568	0.0408074	0.421483
1	Hokkaido	27	Cement and cement products	0	0	0	0	0	0	0	0	0	0	0	0	0	0	0	0	0	0	0	0	0	0	0	0	0	0	49.1805	0	0.0298991	0	0	0	0	0	0	0	0	0	0	0	0	0	0	0	0	0
1	Hokkaido	28	Pottery, china and earthenware	0	0	0	0	0.00179503	0	0	0	0	0.00170941	0	0	0	0	4.99767e-05	0	0	0	0	5.63395e-05	0	0	0	7.11372e-05	0	0	9.00854e-05	0.000155501	0	0	0	0	0	0	0	0	0.000116576	7.06513e-05	0	0	0	0.00219738	0.000146169	3.14691e-05	0	0.00200351
1	Hokkaido	29	Other ceramic, stone and clay products	0.012064	0	0	0	0.0458601	0	0	0	0	0.0200166	0.00346414	0	0.00438193	0	0.102997	0	0	0	0	0.0171527	0.0102271	0	0.125498	0.0166599	0.00440073	0.0495934	3.54226	0.0080118	0.434997	0	0.0518091	0.0409242	0	0.000834862	0.00915475	0.0292671	0.106475	0.875287	0.130311	0.103603	0.00896271	0.102035	0.0410781	0.0397972	0.0011357	0.0694037
1	Hokkaido	30	Pig iron and crude steel	0	0	0	0	0	0	0	0	0	0	0	0	0	0	0.0518755	0	0	0	0	0	0	0	0	0	0	0	0	0	0	0	-69.3479	20.1143	-17.252	0	0	-1.72957	-18.0298	-5.75685	-12.3214	-0.956649	-0.695181	-1.65166	-0.0189653	-0.0979942	-0.100673	-0.84485
1	Hokkaido	31	steel products	0.0579908	0	0	0	0	0	0	0	0.20869	27.4511	0	0	0	0	0	0	0	0	0	0	0	0	0	2.84694	3.40315	0	7.75815	0	0.132063	0	618.921	7.33484	402.943	0	0.242034	45.4553	190.928	62.1333	67.3288	20.6178	11.6648	47.2328	7.31217	8.73614	1.2529	10.6359
1	Hokkaido	32	Cast and forged steel products	0	0	0	0	0	0	0	0	0	0.974194	0	0	0	0	0	0	0	0	0	0	0	0	0	0	0	0	0	0	0.0557132	0	0	0	0	0	0.0742592	11.1104	8.57036	102.795	52.187	54.709	13.5225	20.3389	4.06096	0.699437	0.0829108	1.1418
1	Hokkaido	33	Other iron or steel products	0	0	0	0	0	0	0	0	0	0	0	0	0	0	0	0	0	0	0	0	0	0	0	0	0	0	0	0	0	0	0	0	0	0	0	0	0	0	0	0	0	0	0	0	0	0
1	Hokkaido	34	Non-ferrous metals	0	0	0	0	0	0	0	0	0	0.0182082	0.000315117	0	-0.224547	0	0.34815	0	0.00916952	0	0	0.987189	0	0	0	0.0189434	-0.000500392	0.0303644	0	0.00165636	0.0288095	0	2.97537	0.00864196	-0.00654182	0.555527	3.93019	-0.032835	0.615903	-0.0459062	0.0773321	0.0471216	-0.0142677	0.200968	0.0307498	2.39535	0.0010331	0.0951447
1	Hokkaido	35	Non-ferrous metal products	0	0	0	0	0.921985	0.0491955	0	0	0.0122501	2.22813	0	0.0688836	0.899504	0	0.0371534	0	0	0	0	0.242925	0.0162322	0	0	0.655767	0.440039	0.0151373	0	0	0.0629857	0	0	0	0	0.0583034	6.54184	3.62947	6.4565	8.34069	4.79841	4.40692	2.38039	9.42398	7.61191	14.2286	0.25957	35.0266
1	Hokkaido	36	Metal products for construction and architecture	0.0293815	0	0	0	0	0	0	0	0	0.292498	0	0	0	0	0	0	0	0	0	0	0	0	0	0	0	0	0	0	0	0	0	0	0	0	0	4.91826	0.74803	0.181338	0	0.151393	0	0	0	0	0	0.0642792
1	Hokkaido	37	Other metal products	0.201218	0	0.00324066	0	8.07405	4.77346	0	1.1639	0.997675	8.67297	0.0500752	0.512746	1.00698	0	0.331869	0	0.065384	0	0	6.75619	0.677579	0.0221597	0.112136	0.518697	3.4743	0.228005	0.457455	0	1.17529	0	0	0.227528	0.00999578	0	0.16966	13.3212	30.5246	16.2182	11.8335	6.00008	9.89132	5.18453	3.80163	0.749833	0.271511	7.40755
1	Hokkaido	38	General industrial machinery	0	0	0	0	0	0	0	0	0	0.0653242	0	0	0	0	0	0	0	0	0	0	0	0	0	1.27521	0	0.00424427	0.00938884	0	0.0781128	0	0	0.0455306	0.0640081	0	0.0090535	0.0347321	0.261219	114.788	15.2711	3.25046	4.20134	1.25168	1.18444	0.0196785	0.0758121	0.23056
1	Hokkaido	39	Special industrial machinery	0	0	0	0	0	0	0	0	0	0	0	0	0	0	0	0	0	0	0	0	0	0	0	0	0	0	0	0	0	0	0	0	0	0	0	0	0	0.776755	319.322	0	0.0438286	0	0.0251095	0.194612	0	0
1	Hokkaido	40	Other general machines	0	0	0	0	0	0	0	0	0	1.02718	0	0	0	0	0	0	0	0	0	0.062693	0	0	0	0.174151	0	0.00906321	0	0	0.0507658	0	0	0.069447	0	0	0.0193328	0.129792	0.389168	24.5448	17.903	49.5389	1.97317	2.22596	1.5452	0.140072	0.107926	1.34696
1	Hokkaido	41	Machinery for office and service industry	0	0	0	0	0	0	0	0	0	0	0	0	0	0	0	0	0	0	0	0	0	0	0	0	0	0	0	0	0	0	0	0	0	0	0	0	0	0	0	0	0.266217	0	0	0	0	0
1	Hokkaido	42	Industrial electric equipment	0.301643	0	0	0	0	0	0	0	0	0.0529927	0	0	0	0	0	0	0	0	0	0	0	0	0	0	0	0	0	0	0	0	0	0	0	0	0	0	0	19.9092	24.5272	0.205712	17.9544	86.8415	27.9696	4.30223	0.631407	18.9824
1	Hokkaido	43	Applied electric equipment and electric mesuring instruments	0	0	0	0	0	0	0	0	0	0	0	0	0	0	0	0	0	0	0	0	0	0	0	0	0	0	0	0	0	0	0	0	0	0	0	0	0	0.0104943	0.0439786	0.00291375	0.00773588	0.0589073	0.404249	0	0	0.0100677
1	Hokkaido	44	Other electric equipment	0.203875	0	0.00369388	0	0	0	0	0	0	0.152221	0	0	0	0	0	0	0	0	0	0.10034	0	0	0	0	0	0	0	0	0	0	0	0	0	0	0	0	0.31143	0.985657	2.83138	0.590907	2.48023	6.32006	3.76385	23.0442	0.215918	24.7421
1	Hokkaido	45	Household electric and electric applications	0	0	0	0	0	0	0	0	0	0	0	0	0	0	0	0	0	0	0	0	0	0	0	0	0	0	0	0	0	0	0	0	0	0	0	0	0	0	0	0	0	0	0	0	0.0976349	0
1	Hokkaido	46	Communication equipment	0	0	0	0	0	0	0	0	0	0	0	0	0.101571	0	0	0	0	0	0	0	0.0296321	0	0	0	0	0	0	0	0	0	0	0	0	0	0	0	0	0.575291	0.107876	0	0	0.0154246	1.24972	0.0128122	0	21.616
1	Hokkaido	47	Electric computing equipment and accessory equipment	0	0	0	0	0	0	0	0	0	0	0	0	0	0	0	0	0	0	0	0	0	0	0	0	0	0	0	0	0	0	0	0	0	0	0	0	0	0	0.0539197	0	0	0	0	0	0	0.0104395
1	Hokkaido	48	Semiconductor devices and integrated circuits	0	0	0	0	0	0	0	0	0	0	0	0	0	0	0	0	0	0	0	0	0	0	0	0	0	0	0	0	0	0	0	0	0	0	0	0	0.214195	0.778881	5.06316	1.37407	83.8956	52.0987	344.467	2.59367	3.11858	447.442
1	Hokkaido	49	Other electrical equipment	0	0	0	0	0	0	0	0	0	0	0	0.0566402	2.745	0	0	0	0	0	0	0	0	0	0	0	0	0	0	0	0	0	0	0	0	0	0.0424805	0	0.114017	8.15384	17.1297	0.468728	69.4959	48.7819	417.211	1.29269	2.34777	545.177
1	Hokkaido	50	Passenger motor cars	0	0	0	0	0	0	0	0	0	0	0	0	0	0	0	0	0	0	0	0	0	0	0	0	0	0	0	0	0	0	0	0	0	0	0	0	0	0	0	0	0	0	0	0	0	0
1	Hokkaido	51	Other cars	0	0	0	0	0	0	0	0	0	0	0	0	0	0	0	0	0	0	0	0	0	0	0	0	0	0	0	0	0	0	0	0	0	0	0	0	0	0	0	0	0	0	0	0	0	0
1	Hokkaido	52	Motor vheicle parts and accessories	0	0	0	0	0	0	0	0	0	0	0	0	0	0	0	0	0	0	0	0	0	0	0	0	0	0	0	0	0	0	0	0	0	0	0	0	0	0	0.0942147	0	0	0	0	0	0	0
1	Hokkaido	53	Other transportation equipment	1.47933	0	0	0	0	0	0	0	0	0	0	0	0	0	0	0	0	0	0	0	0	0	0	0	0	0	0	0	0	0	0	0	0	0	0	0	0	0	0	0	0	0	0	0	0	0
1	Hokkaido	54	Precision instruments	0.313219	0	0	0	0	0	0.00263289	0.00244279	0.00300579	0	0.0043171	0.00845096	0.00910147	0	0	0	0	0	0	0.0123324	0.00531052	0	0	0.0467144	0	0	0	0	0	0	0	0	0	0	0.00316914	0.00607892	0.00850592	1.05678	2.90769	0.0161391	0.907528	0.475464	0.791886	0.00229613	0.00353836	0.953248
1	Hokkaido	55	Miscellaneous manufacturing products	0.170946	0	0.00206483	0	0.374556	0.0585604	0.00598731	3.95887	0.052404	0.813081	0.00654485	0.0576536	0.124183	0	0	0	0.00991914	0	0	0.081017	0	0	0.0264626	0.0393447	0.0233842	0.0833369	0.0298948	0.00860048	0.209067	0	0	0.0862933	0.00424597	0	0.038436	0.0737265	0.0515809	0.660384	0.208097	0.0326232	0	0.0335264	0.141476	0.00870249	0.00268213	0.570212
1	Hokkaido	56	Reuse and recycling	0	0	0	0	0	22.8315	0	0	0	0	0.934428	0	0	0	0.849998	0	0	0	0	0	0	0	0	24.8892	0.114141	1.38524	1.75104	0.075564	0.0791752	0	4.65839	20.6224	1.86526	13.2521	30.8151	0	0	0	0	0	0	0	0	0	0	0
1	Hokkaido	57	Building construction and repair of construction	0.345815	0	0.00124071	0	1.40406	0.22828	0.0330983	0.695615	0.0599649	0.518103	0.121519	1.77371	2.11793	0.00142759	0.12656	0	0.0143045	0.00301747	0	1.30541	0.166897	0.012726	0.166004	1.88091	0.214512	0.136421	0.865822	0	0.241067	0	1.79978	0.0846221	0.33065	0.108757	0.0666879	1.01172	0.925166	0.693126	1.03027	0.248463	0.0508745	0.701055	0.500585	0.308101	0.0135377	1.66459
1	Hokkaido	58	Public construction	0	0	0	0	0	0	0	0	0	0	0	0	0	0	0	0	0	0	0	0	0	0	0	0	0	0	0	0	0	0	0	0	0	0	0	0	0	0	0	0	0	0	0	0	0	0
1	Hokkaido	59	Other civil enginnering and construction	0	0	0	0	0	0	0	0	0	0	0	0	0	0	0	0	0	0	0	0	0	0	0	0	0	0	0	0	0	0	0	0	0	0	0	0	0	0	0	0	0	0	0	0	0	0
1	Hokkaido	60	Electricity	0.298368	0	0.0165892	0	10.5619	0.733376	0.131386	0.44097	0.216385	0.617871	0.293128	0.760475	7.30783	0.00284895	0.334106	0	0.124177	0.00100363	0	2.24416	0.192599	0.209944	0.133275	2.26603	1.39362	0.157595	0.715162	0.00990056	0.2762	0	3.70026	0.715232	0.404772	0.329814	0.183207	0.606698	2.25567	1.85414	1.90947	0.88459	0.510172	0.866866	0.4057	0.21163	0.14473	1.52143
1	Hokkaido	61	Gas supply and heat supply	0.00157731	0	0	0	3.02197	0.298163	0.0288377	0.0175295	0.00227049	0.0361155	0.00815253	0.161186	0.0515624	0	0.0151496	0	0.00988453	0	0	0.265492	0.0957724	0	0.00395555	0.321501	0.0763807	0.1097	0.0446857	0.00471376	0.0112251	0	0.814885	0.055895	0.00317337	0.00835027	0.0197494	0.0792091	0.279493	0.120713	0.08105	0.037589	0.0597633	0.0955301	0.0352455	0.0637402	0.00267277	0.262257
1	Hokkaido	62	Water supply and waste management services	0.0125423	0	0.000201996	0	1.73959	0.197106	0.0272359	0.0127706	0.00802412	0.0346836	0.0225693	0.0695608	0.309785	0	0.0223084	0	0.0148465	0.000409387	0	0.398263	0.11873	0.0051797	0.00465976	0.0877565	0.0453707	0.0104111	0.269786	0.000757222	0.0428441	0	0.171165	0.00506508	0.00809972	0.0107048	0.00881268	0.0459793	0.0851512	0.274659	0.228377	0.070012	0.0869684	0.0747175	0.0513073	0.0140471	0.0110201	0.112467
1	Hokkaido	63	Commerce	216.882	0	0.555552	0	5456.02	253.527	21.8693	354.537	60.3548	363.602	59.8712	720.129	2818.83	0.387412	37.7257	0	16.2068	0.750626	0	859.418	138.632	3.68375	35.7288	438.928	244.292	22.1742	390.71	1.17803	44.3477	0	442.325	38.3301	302.942	9.3075	45.361	198.026	391.739	712.722	862.422	232.801	543.182	376.089	785.515	168.03	21.1899	1330.05
1	Hokkaido	64	Financial and insurance	5.88175	0	0.0345625	0	20.91	2.1679	0.968027	11.3735	0.660479	7.61058	0.810435	13.4009	33.7151	0.00451914	0.586757	0	0.115468	0.003184	0	4.90406	1.16231	0.284681	0.0724824	4.15352	4.00315	0.891977	17.5253	0.0549666	1.13953	0	4.93394	0.563328	2.18546	1.04859	0.328994	3.11851	3.65348	11.0376	8.01462	8.3958	3.17262	4.83066	3.74822	0.524404	0.180601	8.27553
1	Hokkaido	65	Real estate agencies and rental services	4.79177	0	0.0104183	0	22.6782	2.02213	0.407827	8.54862	0.189684	8.06182	0.965911	15.6114	26.5772	0	0.732196	0	0.120115	0	0	4.76383	2.90951	0.0712404	0.640893	20.6061	5.28973	0.357979	21.9467	0.039055	0.668383	0	5.61789	1.35845	0.996188	0.34321	0.272717	2.54583	7.73447	12.9535	13.3095	7.99354	2.72336	10.7681	8.58122	3.24049	0.30449	9.80178
1	Hokkaido	66	House rent	0	0	0	0	0	0	0	0	0	0	0	0	0	0	0	0	0	0	0	0	0	0	0	0	0	0	0	0	0	0	0	0	0	0	0	0	0	0	0	0	0	0	0	0	0	0
1	Hokkaido	67	Transport	395.066	0	10.6445	0	1264.02	127.15	10.7216	78.1331	53.4116	112.869	14.2239	177.91	1308.88	0	21.3291	0	4.45676	0	0	304.768	78.0482	11.3395	4.65257	151.287	53.6334	18.3334	1247	0.56004	209.959	0	358.799	12.587	61.5182	8.923	21.0396	144.476	229.029	310.177	243.341	142.198	150.352	115.639	266.439	29.4675	4.45365	568.761
1	Hokkaido	68	Communication	16.7007	0	0.110548	0	19.1239	1.17571	0.54247	11.5302	0.1126	15.302	0.626678	17.1746	105.951	0	0.887919	0	0.122551	0	0	18.4024	47.7948	1.48278	1.56934	18.2289	18.6508	1.32182	3.13948	0	1.06884	0	6.75223	2.00437	0.472131	2.02186	1.92919	14.2327	15.0558	52.6717	24.1533	15.8201	14.9936	20.8404	19.4021	2.55896	0.397653	30.7469
1	Hokkaido	69	Broadcasting	0	0	0	0	0	0	0	0	0	0	0	0	0	0	0	0	0	0	0	0	0	0	0	0	0	0	0	0	0	0	0	0	0	0	0	0	0	0	0	0	0	0	0	0	0	0
1	Hokkaido	70	Information services	1.42393	0	0.0076442	0	5.59334	0.731686	0.0509808	0.324929	0.0986892	2.62509	0.0944956	2.55415	9.33648	0	0.0767477	0	0.037456	0	0	1.97609	2.87247	0.00261356	0.0764143	3.21612	1.1889	0.236394	1.38895	0.0114623	0.164138	0	1.21396	0.214681	0.556452	0.131386	0.197433	0.711356	2.4347	5.19918	6.37691	2.26905	2.7113	5.60624	11.349	2.03743	0.0297884	12.0608
1	Hokkaido	71	﻿Internet based services	0.0349934	0	0	0	0.162123	0.0303436	0.0041365	0.0652432	0.00787061	0.167651	0.0045217	0.137198	0.602951	0	0.00572901	0	0	0	0	0.0516673	0.397697	0.0016258	0.00365649	0.29357	0.0430816	0.0124488	0.0894992	0	0.00871618	0	0.0394484	0.0190778	0.00293345	0.00272434	0.0182563	0.111423	0.144772	0.288865	0.172119	0.0845201	0.104803	0.240313	0.141029	0.0252519	0.00185302	0.645946
1	Hokkaido	72	Image information production and distribution industry	0.614821	0	0.0391805	0	4.97155	0.110302	0.147025	2.25075	0.083924	1.75178	0.0767052	3.19615	14.2538	0	0.222139	0	0.0332147	0	0	3.02592	0.660492	0.00787991	0.106334	1.48875	2.12288	0.230034	4.53806	0.00575983	0.325895	0	1.11988	0.104025	0.184832	0.039613	0.0643525	0.786921	2.97944	2.04123	1.88437	0.88758	1.96096	2.98905	4.92011	0.699378	0.0898124	6.02964
1	Hokkaido	73	Public administration	0	0	0	0	0	0	0	0	0	0	0	0	0	0	0	0	0	0	0	0	0	0	0	0	0	0	0	0	0	0	0	0	0	0	0	0	0	0	0	0	0	0	0	0	0	0
1	Hokkaido	74	Education and Research	1.00948	0	0.0337665	0	69.0583	6.43846	0.629429	4.34094	0.215573	16.1456	0.26375	12.3015	4.65387	0.111007	9.27933	0	2.78072	0.117317	0	218.212	168.04	0.0824628	0.982953	116.668	62.778	13.7611	27.2198	0.307409	3.7452	0	23.4389	1.4152	0.0446367	5.47203	5.41282	10.6895	9.70412	97.4405	179.307	14.5901	150.263	178.878	306.376	60.8388	4.22007	441.78
1	Hokkaido	75	Medical service, health and social security and nursing care	0.548725	0	0.0188374	0	7.41051	1.40239	0.0546221	2.31431	0.0831445	1.12128	0.149271	2.57142	3.11553	0	0.277387	0	0.0361968	0	0	5.17382	3.69077	0.0214685	0.193134	4.05603	3.27111	0.22603	5.5455	0.0156924	0.0657693	0	1.4139	0.251921	0.852191	0.0539619	0.0657471	0.79872	2.52932	9.41132	6.20344	5.91522	7.91726	2.17926	2.43385	0.254057	0.048938	9.47739
1	Hokkaido	76	Advertising and survery	14.4277	0	0.0403643	0	72.1928	28.9615	0.150483	1.78401	0.334049	18.8648	3.70803	40.627	7.6729	0.0165872	0.891566	0	0.049861	0	0	271.11	23.7254	0.0295727	0	27.1612	15.1395	0.452879	1.9619	0.072054	0.87577	0	4.92037	0.636203	0.37351	0.0495549	0.301888	2.76023	3.78123	12.653	11.3568	9.87349	11.0685	10.1732	18.7103	2.99655	0.764001	36.7766
1	Hokkaido	77	Giids rental and leasing services	4.06427	0	0.0474328	0	35.0387	1.72825	0.550155	1.85741	0.546657	8.22083	0.513684	11.0694	55.3634	0	1.03006	0	0.0860803	0	0	6.35478	0.950401	0.174186	2.58016	19.2814	7.57349	0.962944	15.744	0.0570751	1.22366	0	5.5173	1.07485	1.78818	0.211363	0.993309	4.3752	14.9265	51.385	39.4846	22.1285	17.8107	37.7431	29.4145	5.45091	0.431291	70.1251
1	Hokkaido	78	Other business services	3.9767	0	0.0608272	0	56.6414	2.64928	0.541732	6.53014	0.982823	12.7188	0.595622	22.214	200.261	0.00833205	2.03568	0	0.158625	0.0117408	0	16.1951	8.35173	0.297098	0.935464	36.1124	19.9662	3.58296	31.0957	0.0325747	1.8924	0	5.87003	2.73819	0.857696	1.2944	1.22326	7.53373	13.4381	38.6531	29.6831	10.3912	19.5748	22.7158	50.2886	6.3505	0.846556	43.0823
1	Hokkaido	79	Personal services	16.0659	0	0	0	6.97687	0.246024	0	1.15133	0.114866	1.0592	0	1.72241	12.927	0	0.0929011	0	0	0	0	2.3564	0.710293	0	0	2.77696	0.960585	0.0946258	2.00951	0	0.0302873	0	1.23369	0.116012	0.428117	0	0.0807389	0.542046	1.51691	2.69232	2.21643	1.02793	1.54138	3.31	2.10576	0.672722	0	4.34502
1	Hokkaido	80	Activities not elsewhere classified	0	0	0	0	0	0	0	0	0	0	0	0	0	0	0	0	0	0	0	0	0	0	0	0	0	0	0	0	0	0	0	0	0	0	0	0	0	0	0	0	0	0	0	0	0	0
2	Aomori	1	Agriculture, forestry and fishery	85.0205	0	0	0	2488.47	69.0249	6.42263	0.262893	72.3524	0	0.27102	0.151582	0	0	0.392439	0	0.234713	0	0	3.68669	5.09603	0	2.129	0	421.147	0	0	0	1.23677	0	0	0	0	0	0.0568437	0	0	0	0	0	0	0	0	0	0	0
2	Aomori	2	Metallic ores	0	0	0	0	0	0	0	0	0	0	0	0	0	0	0	0	0	0	0	0	0	0	0	0	0	0	0	0	0	0	0	0	0	0	0	0	0	0	0	0	0	0	0	0	0	0
2	Aomori	3	Non-metallic ores	0	0	0.781931	0	0	0	0	0	0	0	2.05981	0	0	0	6.95943	0	0.121825	0	0	2.00921	0.494399	-1.51735	0.812523	0	2.71245	195.024	66.3952	1.90133	32.9819	0	0	1.27181	0	0.121077	0.0737601	0.565935	1.08884	0	0	3.75631	0	0	0	0	0	0
2	Aomori	4	Coal mining, crude petroleum and natural gas	0	0	0	0	0	0	0	0	0	0	0	0	0	0	0	0	0	0	0	0	0	0	0	0	0	0	0	0	0	0	0	0	0	0	0	0	0	0	0	0	0	0	0	0	0	0
2	Aomori	5	Food and Tobacco	12.495	0	0	0	2844.93	78.9017	0	2.46287	0.0196786	0	0.113054	0	0	0	0.0238734	0	0.0171341	0	0	12.7029	2.74662	0	0	0.0339816	0	0	0	0	0.0933976	0	0	0	0	0	0	0	0	0	0	0	0	0	0	0	0	0
2	Aomori	6	Beverage	0.171627	0	0	0	0.581063	2.61501	0	0	0	0	0	0	0	0	0	0	0.0019206	0	0	0	0.00194858	0	0	0	0	0	0	0	0	0	0	0	0	0	0	0	0	0	0	0	0	0	0	0	0	0
2	Aomori	7	Textile products	0.00463725	0	0	0	0	8.78923e-05	0.0417441	0.622705	0	0.0102925	0.000746553	0.00476884	0.0082009	0	0	0	0	0	0	7.4829e-05	0	0	0	0.00283449	0.0432394	0.000189309	0	0	0.0011253	0	0	0	0	0	0.000230752	0.000110655	0.000619335	0.00037535	0.00788302	0	0	0	0	4.17966e-05	0.000708499	0.00110876
2	Aomori	8	Wearing aparel and other textile products	17.8123	0	0.0552123	0	48.0945	1.13246	4.41409	22.0472	1.22718	3.68373	0.393762	9.02948	6.87833	0	0.285084	0	0.0909364	0	0	5.57059	1.061	0	2.12278	1.30755	2.79886	0.735622	3.19747	0	1.65231	0	3.55212	0.356003	1.11913	0.0451891	0.523054	1.21452	4.47022	6.76177	3.96336	5.42087	3.75976	11.7422	6.48509	0.917499	0.276628	17.196
2	Aomori	9	Timber and wooden products	0.288674	0	0	0	1.39353	0.0606827	0	0.0997765	11.3659	22.7945	2.74334	8.85525	0.128684	0	0	0	0	0	0	0.135617	0	0	0	0.146774	0.00538481	0.231064	0.0103261	0.028519	0.115792	0	0	0.100151	0	0	0.21906	0.267395	0.581272	0.129575	0.151858	0.0507084	0.643394	0.134623	0.150792	0.0396787	0.00555867	0.17224
2	Aomori	10	Furniture and fixtures	0.00529242	0	0	0	0.441352	0.0152973	0.00500486	0.0882265	0.00380914	2.94784	0.00547092	0.13387	0.236447	0	0.00693169	0	0.00663322	0	0	0.184936	0.0269194	0	0	0.14471	0.0412661	0.00470691	0.0458139	0.00143785	0.0271181	0	0.0545482	0.0115414	0	0	0.00602422	0.00770361	0.0377275	0.0489961	0.107801	0.0374965	0.0412849	0.0648081	0.101367	0.0116392	0.00672607	0.623308
2	Aomori	11	Pulp, paper, paperboard, building paper	0.0706182	0	0	0	3.92605	0.0816464	0.578771	0.165225	1.16901	8.85803	105.047	322.386	313.112	0	0.986575	0	0	0.124471	0	9.59257	0.0897982	0	0	2.89636	0.811447	0.401956	0	0	1.28656	0	0.363926	0	0.284152	0	0.160766	0	0.0719154	0.0871691	0	0.272905	0	5.9364	0.090171	0.0776527	0.0598318	2.57491
2	Aomori	12	Paper products	0.793887	0	0	0	26.5247	2.4522	0.0423309	0.314196	0.00852818	1.17566	0	0.951107	1.2309	0.00494044	0.0655253	0	0.00990062	0	0	16.352	0.74834	0	0	0.446711	0.119944	0.31755	0.186494	0.0278994	0.047222	0	0	0	0.0158927	0	0.00299721	0	0.390157	0.12676	0.0109705	0.111933	0.136447	0.190848	0.196688	0.0651469	0.0301176	0.679751
2	Aomori	13	Publishing, printing	0.0286205	0	0.000691408	0	20.2273	0.41914	0.0180436	0.898424	0.0205992	0.592006	0.00164365	6.7311	270.651	0	0.0527571	0	0	0	0	6.80821	0.125356	0.00236393	0.00531659	0.0592855	0.0965721	0.190058	0.040041	0	0.0325889	0	0.114717	0.0450766	0.00853057	0.00198061	0.0313713	0.0648041	0.71894	0.624133	0.556468	0.25398	1.92785	0.248382	0.641566	0.0244778	0.0916071	3.60148
2	Aomori	14	Chemical fertilizer	4.21034	0	0	0	0	0.0225363	0	0	0	0	0	0	0	0.292582	1.00417	0	0.158798	0.0171784	0	1.746	0.508121	0	0	0	0	0	0	0	0.0110975	0	1.1552	0	0	0	0	0	0	0	0	0	0	0	0	0.010717	0	0
2	Aomori	15	Basic inorganic chemical products	0	0	0	0	0.748562	0.0224858	0.0371925	0.000379199	0	0.00322692	0.00971722	0.0262372	0.00282568	0.00648725	0.575681	0	0.0662209	0.00114266	0	2.61121	0.39487	0	0	0.14342	0.503887	0.125922	0.0204069	0	0.00184544	0	0.198784	0.00212062	0.000869523	0.000807539	0.000983904	0.0217038	0.0178253	0.0136039	0.0138051	0.0183723	0.00794694	0.0201683	0.0405615	0.0174652	0	0.0524767
2	Aomori	16	Basic organic chemical products	0	0	0	0	0	0	0	0	0	0	0	0	0	0	0	0	0	0	0	0	0	0	0	0	0	0	0	0	0	0	0	0	0	0	0	0	0	0	0	0	0	0	0	0	0	0
2	Aomori	17	Organic chemical products	0.0523071	0	0	0	0.491135	0.0870849	0.15477	0.000815885	0.00451767	0.00416582	0.0201866	0.00846779	0.0577575	0	0.0730758	0	0.806809	0.0522442	0	6.54917	1.37861	0	0.002332	0.913613	1.18491	0.0106686	0	0	0.00397065	0	0	0	0	0.000434375	0.00793862	0.00101517	0.00710239	0.0318527	0.000645718	0.00808565	0.115027	0.0156957	0.00356212	0.00191725	0.011818	0.0127149
2	Aomori	18	Synthetic resins	0	0	0	0	0	0	0	0	0	0	0	0	0	0	0	0	0	0	0	0	0	0	0	0	0	0	0	0	0	0	0	0	0	0	0	0	0	0	0	0	0	0	0	0	0	0
2	Aomori	19	Synthetic fibers	0	0	0	0	0	0	0	0	0	0	0	0	0	0	0	0	0	0	0	0	0	0	0	0	0	0	0	0	0	0	0	0	0	0	0	0	0	0	0	0	0	0	0	0	0	0
2	Aomori	20	Final chemical products	0.00019613	0	7.00102e-06	0	0.00140211	7.78425e-05	0.000116267	0.000160952	0.000286537	0.000646951	0.000183075	0.00300921	0.0519875	0	0.000526537	0	9.72265e-05	0	0	0.0255496	0.00169554	2.17605e-05	0.000171291	0.000993239	0.000350782	2.08277e-05	0.000142827	0	0.000228324	0	6.78855e-05	2.55348e-05	7.85257e-06	0	2.8878e-05	6.81756e-05	0.000435238	0.000180669	0.000168037	0.00012821	0.00133749	0.000222828	0.00018876	0.000101396	4.96037e-06	0.000531549
2	Aomori	21	Medicaments	4.60906	0	0	0	0.266365	0	0	0.00364318	0	0	0	0	0	0	0	0	0	0	0	1.25069	7.48847	0	0	0	0	0	0	0	0	0	0	0	0	0	0	0	0	0	0	0	0	0	0	0	0	0
2	Aomori	22	Petroleum refinery products	0	0	0	0	0	0	0	0	0	0	0	0	0	0	0	0	0	0	0	0	0	0	0	0	0	0	0	0	0	0	0	0	0	0	0	0	0	0	0	0	0	0	0	0	0	0
2	Aomori	23	Coal products	0	0	0	0	0	0	0	0	0	0	8.65968e-05	0	0	0	0.000341347	0	0.000419977	0	0	5.49722e-05	0	0	0	0	0	0	0	0	0.00117644	0	0.0155415	0.0054805	0	0.000695664	0.000254279	8.12914e-05	0	0	0.000206828	7.19412e-05	0	0	0	0	0	8.14535e-05
2	Aomori	24	Plastic products	0.233035	0	0	0	4.75684	0.579608	0.00864209	0.242834	0.0366455	0.598498	0.043523	2.02892	18.0227	0.0024495	0.0530065	0	0.0012272	0	0	2.6832	0.425815	0	0	13.194	0.922575	0.0355293	0.00924646	0	0.0156086	0	0	0	0	0.00121966	0.147118	0.06271	0.121649	0.145034	1.26553	0.161446	1.05841	0.73625	0.508849	0.685841	0.0447975	4.14855
2	Aomori	25	Rubber products	0.267663	0	0.000579058	0	0.239187	0.00461885	0.00419767	0.0646502	0.00287532	0.0397707	0.00275314	0.0538942	0.291665	0	0.00116275	0	0.00250353	0	0	0.0340804	0.0143933	0	0.00445268	0.0331013	1.12248	0	0.0775486	0	0.0318423	0	0.113233	0.001452	0.0017861	0	0.00101053	0.077534	0.0556008	0.659147	0.594269	0.106355	0.78058	0.320846	0.282261	0.0607687	0.0135391	0.723476
2	Aomori	26	Glass and glass products	0.000484162	0	0	0	0.124923	0.349857	0	0	0	0.15954	0	0	0.00158273	0	0.00465025	0	0	0	0	0.461322	0.0566407	0	0	0.0493431	0.00238428	0.0563222	0.000762027	0	0.00716682	0	0	0	0	0	0	0.00352371	0.00591666	0.00657398	0.000896529	0	0.0334519	0.00192285	0.0652218	0.0311448	0.00164084	0.0169476
2	Aomori	27	Cement and cement products	0	0	0	0	0	0	0	0	0	0	0	0	0	0	0	0	0	0	0	0	0	0	0	0	0	0	13.5318	0	0.00822665	0	0	0	0	0	0	0	0	0	0	0	0	0	0	0	0	0
2	Aomori	28	Pottery, china and earthenware	0	0	0	0	0.0533331	0	0	0	0	0.0507891	0	0	0	0	0.00148488	0	0	0	0	0.00167393	0	0	0	0.00211359	0	0	0.00267657	0.00462017	0	0	0	0	0	0	0	0	0.00346365	0.00209916	0	0	0	0.0652875	0.00434289	0.000934994	0	0.0595273
2	Aomori	29	Other ceramic, stone and clay products	0.0199649	0	0	0	0.0758944	0	0	0	0	0.0331257	0.00573284	0	0.00725171	0	0.170451	0	0	0	0	0.0283861	0.0169249	0	0.207688	0.0275706	0.00728281	0.0820727	5.86212	0.0132588	0.719882	0	0.0857395	0.067726	0	0.00138162	0.0151503	0.0484345	0.176207	1.44852	0.215654	0.171454	0.0148325	0.168859	0.0679806	0.0658609	0.00187949	0.114857
2	Aomori	30	Pig iron and crude steel	0	0	0	0	0	0	0	0	0	0	0	0	0	0	0.0887939	0	0	0	0	0	0	0	0	0	0	0	0	0	0	0	-118.701	34.4291	-29.5299	0	0	-2.96047	-30.8611	-9.85384	-21.0903	-1.63747	-1.18992	-2.82711	-0.0324624	-0.167734	-0.17232	-1.44611
2	Aomori	31	steel products	0.00273638	0	0	0	0	0	0	0	0.00984735	1.29532	0	0	0	0	0	0	0	0	0	0	0	0	0	0.134337	0.160582	0	0.36608	0	0.0062316	0	29.2047	0.346105	19.0135	0	0.0114207	2.14488	9.00923	2.93185	3.17701	0.972879	0.550418	2.22875	0.345035	0.412228	0.0591197	0.501869
2	Aomori	32	Cast and forged steel products	0	0	0	0	0	0	0	0	0	0.0882922	0	0	0	0	0	0	0	0	0	0	0	0	0	0	0	0	0	0	0.00504934	0	0	0	0	0	0.00673018	1.00695	0.77674	9.31638	4.72975	4.95833	1.22556	1.84334	0.368049	0.0633907	0.00751428	0.103483
2	Aomori	33	Other iron or steel products	0	0	0	0	0	0	0	0	0	5.85869	0	0	0	0	0.00573503	0	0	0	0	0.00969778	0	0	0	0.00816328	0	0	0.108545	0	0.0373943	0	0	0.093102	0	0	0.0124605	9.42669	18.2504	7.15488	4.8102	0.896853	1.35045	1.83902	0.0209668	0.447789	0.208684	2.61763
2	Aomori	34	Non-ferrous metals	0	0	0	0	0	0	0	0	0	0.622766	0.0107778	0	-7.68008	0	11.9076	0	0.313621	0	0	33.7643	0	0	0	0.647912	-0.0171147	1.03854	0	0.0566516	0.985358	0	101.765	0.295577	-0.223747	19.0004	134.422	-1.12304	21.0654	-1.57011	2.64495	1.61168	-0.487991	6.87362	1.05172	81.9268	0.0353345	3.25419
2	Aomori	35	Non-ferrous metal products	0	0	0	0	4.00841	0.213882	0	0	0.0532581	9.687	0	0.299477	3.91067	0	0.161527	0	0	0	0	1.05614	0.0705708	0	0	2.851	1.91311	0.0658105	0	0	0.273835	0	0	0	0	0.253479	28.4412	15.7794	28.0702	36.2618	20.8615	19.1594	10.3489	40.9715	33.0934	61.86	1.1285	152.281
2	Aomori	36	Metal products for construction and architecture	0.00636336	0	0	0	0	0	0	0	0	0.0633486	0	0	0	0	0	0	0	0	0	0	0	0	0	0	0	0	0	0	0	0	0	0	0	0	0	1.06518	0.162006	0.0392737	0	0.0327884	0	0	0	0	0	0.0139214
2	Aomori	37	Other metal products	0.0861418	0	0.00138733	0	3.45651	2.04352	0	0.498266	0.427106	3.71291	0.0214373	0.219507	0.43109	0	0.142074	0	0.027991	0	0	2.89234	0.290073	0.0094866	0.0480056	0.222055	1.48735	0.0976091	0.195837	0	0.503144	0	0	0.0974051	0.00427921	0	0.0726317	5.70281	13.0676	6.94302	5.06592	2.56864	4.23449	2.2195	1.62748	0.321004	0.116234	3.17119
2	Aomori	38	General industrial machinery	0	0	0	0	0	0	0	0	0	0.00168964	0	0	0	0	0	0	0	0	0	0	0	0	0	0.032984	0	0.00010978	0.000242847	0	0.00202042	0	0	0.00117767	0.0016556	0	0.000234173	0.000898363	0.00675656	2.96904	0.394995	0.0840748	0.10867	0.0323753	0.030636	0.000508995	0.00196092	0.00596353
2	Aomori	39	Special industrial machinery	0	0	0	0	0	0	0	0	0	0	0	0	0	0	0	0	0	0	0	0	0	0	0	0	0	0	0	0	0	0	0	0	0	0	0	0	0	0.303108	124.607	0	0.017103	0	0.00979833	0.0759425	0	0
2	Aomori	40	Other general machines	0	0	0	0	0	0	0	0	0	0.190373	0	0	0	0	0	0	0	0	0	0.0116193	0	0	0	0.0322765	0	0.00167974	0	0	0.00940874	0	0	0.0128711	0	0	0.00358307	0.0240552	0.0721269	4.54904	3.31808	9.18136	0.3657	0.412551	0.286381	0.0259604	0.0200026	0.24964
2	Aomori	41	Machinery for office and service industry	0	0	0	0	0	0	0	0	0	0	0	0	0	0	0	0	0	0	0	0	0	0	0	0	0	0	0	0	0	0	0	0	0	0	0	0	0	0	0	0	60.5784	0	0	0	0	0
2	Aomori	42	Industrial electric equipment	0.12513	0	0	0	0	0	0	0	0	0.0219828	0	0	0	0	0	0	0	0	0	0	0	0	0	0	0	0	0	0	0	0	0	0	0	0	0	0	0	8.25887	10.1745	0.0853349	7.44794	36.0241	11.6025	1.78468	0.261924	7.87438
2	Aomori	43	Applied electric equipment and electric mesuring instruments	0	0	0	0	0	0	0	0	0	0	0	0	0	0	0	0	0	0	0	0	0	0	0	0	0	0	0	0	0	0	0	0	0	0	0	0	0	1.72388	7.2243	0.478637	1.27076	9.67661	66.4055	0	0	1.6538
2	Aomori	44	Other electric equipment	0.00132525	0	2.40113e-05	0	0	0	0	0	0	0.000989484	0	0	0	0	0	0	0	0	0	0.000652238	0	0	0	0	0	0	0	0	0	0	0	0	0	0	0	0	0.00202439	0.00640707	0.0184049	0.00384108	0.0161223	0.0410823	0.0244661	0.149794	0.00140353	0.160831
2	Aomori	45	Household electric and electric applications	0	0	0	0	0	0	0	0	0	0	0	0	0	0	0	0	0	0	0	0	0	0	0	0	0	0	0	0	0	0	0	0	0	0	0	0	0	0	0	0	0	0	0	0	0.22944	0
2	Aomori	46	Communication equipment	0	0	0	0	0	0	0	0	0	0	0	0	0.0246938	0	0	0	0	0	0	0	0.00720415	0	0	0	0	0	0	0	0	0	0	0	0	0	0	0	0	0.139865	0.0262268	0	0	0.00375003	0.30383	0.00311488	0	5.25527
2	Aomori	47	Electric computing equipment and accessory equipment	0	0	0	0	0	0	0	0	0	0	0	0	0	0	0	0	0	0	0	0	0	0	0	0	0	0	0	0	0	0	0	0	0	0	0	0	0	0	0.263615	0	0	0	0	0	0	0.0510389
2	Aomori	48	Semiconductor devices and integrated circuits	0	0	0	0	0	0	0	0	0	0	0	0	0	0	0	0	0	0	0	0	0	0	0	0	0	0	0	0	0	0	0	0	0	0	0	0	0.161038	0.585586	3.80663	1.03306	63.0753	39.1694	258.981	1.95	2.34465	336.401
2	Aomori	49	Other electrical equipment	0	0	0	0	0	0	0	0	0	0	0	0.0309556	1.50023	0	0	0	0	0	0	0	0	0	0	0	0	0	0	0	0	0	0	0	0	0	0.0232169	0	0.0623138	4.45633	9.36192	0.256175	37.9816	26.6608	228.019	0.706494	1.28313	297.956
2	Aomori	50	Passenger motor cars	0	0	0	0	0	0	0	0	0	0	0	0	0	0	0	0	0	0	0	0	0	0	0	0	0	0	0	0	0	0	0	0	0	0	0	0	0	0	0	0	0	0	0	0	0	0
2	Aomori	51	Other cars	0	0	0	0	0	0	0	0	0	0	0	0	0	0	0	0	0	0	0	0	0	0	0	0	0	0	0	0	0	0	0	0	0	0	0	0	0	0	0	0	0	0	0	0	0	0
2	Aomori	52	Motor vheicle parts and accessories	0	0	0	0	0	0	0	0	0	0	0	0	0	0	0	0	0	0	0	0	0	0	0	0	0	0	0	0	0	0	0	0	0	0	0	0	0	0	0.000665054	0	0	0	0	0	0	0
2	Aomori	53	Other transportation equipment	1.16652	0	0	0	0	0	0	0	0	0	0	0	0	0	0	0	0	0	0	0	0	0	0	0	0	0	0	0	0	0	0	0	0	0	0	0	0	0	0	0	0	0	0	0	0	0
2	Aomori	54	Precision instruments	1.3198	0	0	0	0	0	0.0110942	0.0102931	0.0126655	0	0.0181909	0.0356097	0.0383508	0	0	0	0	0	0	0.0519647	0.0223768	0	0	0.19684	0	0	0	0	0	0	0	0	0	0	0.0133537	0.0256146	0.0358413	4.45295	12.2521	0.0680053	3.82404	2.00346	3.33676	0.00967516	0.0149095	4.01669
2	Aomori	55	Miscellaneous manufacturing products	0.058508	0	0.000706712	0	0.128196	0.0200429	0.00204922	1.35497	0.0179359	0.278286	0.00224005	0.0197326	0.042503	0	0	0	0.00339494	0	0	0.027729	0	0	0.00905713	0.0134662	0.00800349	0.028523	0.0102318	0.00294361	0.0715554	0	0	0.0295349	0.00145323	0	0.0131552	0.0252337	0.0176541	0.226024	0.0712236	0.0111657	0	0.0114748	0.0484216	0.00297853	0.000917988	0.195161
2	Aomori	56	Reuse and recycling	0	0	0	0	0	0	0	0	0	0	0	0	0	0	0	0	0	0	0	0	0	0	0	0	0	0	0	0	0	0	0	0	0	0	0	0	0	0	0	0	0	0	0	0	0	0
2	Aomori	57	Building construction and repair of construction	0	0	0	0	0	0	0	0	0	0	0	0	0	0	0	0	0	0	0	0	0	0	0	0	0	0	0	0	0	0	0	0	0	0	0	0	0	0	0	0	0	0	0	0	0	0
2	Aomori	58	Public construction	0	0	0	0	0	0	0	0	0	0	0	0	0	0	0	0	0	0	0	0	0	0	0	0	0	0	0	0	0	0	0	0	0	0	0	0	0	0	0	0	0	0	0	0	0	0
2	Aomori	59	Other civil enginnering and construction	0	0	0	0	0	0	0	0	0	0	0	0	0	0	0	0	0	0	0	0	0	0	0	0	0	0	0	0	0	0	0	0	0	0	0	0	0	0	0	0	0	0	0	0	0	0
2	Aomori	60	Electricity	0	0	0	0	0	0	0	0	0	0	0	0	0	0	0	0	0	0	0	0	0	0	0	0	0	0	0	0	0	0	0	0	0	0	0	0	0	0	0	0	0	0	0	0	0	0
2	Aomori	61	Gas supply and heat supply	0	0	0	0	0	0	0	0	0	0	0	0	0	0	0	0	0	0	0	0	0	0	0	0	0	0	0	0	0	0	0	0	0	0	0	0	0	0	0	0	0	0	0	0	0	0
2	Aomori	62	Water supply and waste management services	0	0	0	0	0	0	0	0	0	0	0	0	0	0	0	0	0	0	0	0	0	0	0	0	0	0	0	0	0	0	0	0	0	0	0	0	0	0	0	0	0	0	0	0	0	0
2	Aomori	63	Commerce	47.3577	0	0.121309	0	1191.36	55.3593	4.77531	77.4155	13.1789	79.395	13.0733	157.245	615.512	0.0845942	8.23768	0	3.53886	0.163904	0	187.66	30.2713	0.804373	7.80163	95.8429	53.3428	4.84189	85.3142	0.257232	9.68363	0	96.5848	8.36964	66.1496	2.03236	9.90489	43.2404	85.539	155.628	188.316	50.8337	118.608	82.1217	171.523	36.6906	4.62696	290.426
2	Aomori	64	Financial and insurance	2.25304	0	0.0132394	0	8.00969	0.830429	0.370809	4.35671	0.253	2.91528	0.310442	5.13331	12.9148	0.00173108	0.224761	0	0.0442308	0.00121965	0	1.87853	0.445232	0.109049	0.0277648	1.59103	1.53343	0.341677	6.71317	0.0210553	0.436503	0	1.88998	0.215787	0.837153	0.401667	0.126023	1.19456	1.39949	4.22801	3.07005	3.21606	1.21529	1.85041	1.43578	0.200876	0.0691803	3.16999
2	Aomori	65	Real estate agencies and rental services	0	0	0	0	0	0	0	0	0	0	0	0	0	0	0	0	0	0	0	0	0	0	0	0	0	0	0	0	0	0	0	0	0	0	0	0	0	0	0	0	0	0	0	0	0	0
2	Aomori	66	House rent	0	0	0	0	0	0	0	0	0	0	0	0	0	0	0	0	0	0	0	0	0	0	0	0	0	0	0	0	0	0	0	0	0	0	0	0	0	0	0	0	0	0	0	0	0	0
2	Aomori	67	Transport	60.4216	0	1.62797	0	193.321	19.4463	1.63977	11.9497	8.1688	17.2622	2.17541	27.2096	200.182	0	3.26208	0	0.68162	0	0	46.6114	11.9367	1.73426	0.711567	23.138	8.20272	2.80392	190.717	0.0856529	32.1112	0	54.875	1.92506	9.40863	1.36469	3.21781	22.0963	35.0278	47.4387	37.2167	21.7478	22.9949	17.6858	40.7494	4.50678	0.681144	86.9867
2	Aomori	68	Communication	3.03549	0	0.020093	0	3.47592	0.213695	0.0985985	2.09571	0.020466	2.78127	0.113904	3.12163	19.2574	0	0.161387	0	0.0222747	0	0	3.34478	8.68711	0.269508	0.285241	3.31326	3.38995	0.240252	0.570626	0	0.19427	0	1.22727	0.364311	0.0858138	0.367489	0.350646	2.58691	2.73652	9.57352	4.39007	2.87544	2.7252	3.78791	3.52649	0.465113	0.0722767	5.5885
2	Aomori	69	Broadcasting	0	0	0	0	0	0	0	0	0	0	0	0	0	0	0	0	0	0	0	0	0	0	0	0	0	0	0	0	0	0	0	0	0	0	0	0	0	0	0	0	0	0	0	0	0	0
2	Aomori	70	Information services	0.145729	0	0.000782334	0	0.572441	0.0748832	0.00521754	0.0332544	0.0101002	0.26866	0.009671	0.2614	0.955528	0	0.00785462	0	0.00383337	0	0	0.20224	0.293979	0.000267481	0.0078205	0.329149	0.121676	0.0241933	0.14215	0.00117309	0.0167984	0	0.12424	0.0219712	0.0569492	0.0134465	0.0202059	0.0728026	0.249176	0.532102	0.652635	0.232222	0.277484	0.573762	1.1615	0.208517	0.00304865	1.23434
2	Aomori	71	﻿Internet based services	0.00518773	0	0	0	0.0240345	0.0044984	0.000613232	0.00967223	0.00116681	0.0248541	0.000670337	0.0203394	0.0893867	0	0.00084932	0	0	0	0	0.00765962	0.0589581	0.000241022	0.000542071	0.0435214	0.0063868	0.00184552	0.0132682	0	0.00129216	0	0.00584818	0.00282827	0.000434881	0.00040388	0.00270648	0.0165183	0.0214623	0.0428239	0.0255164	0.01253	0.0155369	0.0356261	0.0209073	0.00374357	0.000274709	0.0957607
2	Aomori	72	Image information production and distribution industry	0.277568	0	0.0176885	0	2.24446	0.0497971	0.066376	1.01613	0.0378885	0.790861	0.0346295	1.44294	6.43506	0	0.100287	0	0.0149952	0	0	1.36609	0.298187	0.00355748	0.0480056	0.672114	0.958401	0.103852	2.04876	0.00260034	0.147129	0	0.505582	0.0469632	0.0834447	0.0178838	0.0290527	0.355265	1.34511	0.921536	0.850721	0.400708	0.885297	1.34944	2.22124	0.315742	0.0405469	2.72215
2	Aomori	73	Public administration	0	0	0	0	0	0	0	0	0	0	0	0	0	0	0	0	0	0	0	0	0	0	0	0	0	0	0	0	0	0	0	0	0	0	0	0	0	0	0	0	0	0	0	0	0	0
2	Aomori	74	Education and Research	0	0	0	0	0	0	0	0	0	0	0	0	0	0	0	0	0	0	0	0	0	0	0	0	0	0	0	0	0	0	0	0	0	0	0	0	0	0	0	0	0	0	0	0	0	0
2	Aomori	75	Medical service, health and social security and nursing care	0	0	0	0	0	0	0	0	0	0	0	0	0	0	0	0	0	0	0	0	0	0	0	0	0	0	0	0	0	0	0	0	0	0	0	0	0	0	0	0	0	0	0	0	0	0
2	Aomori	76	Advertising and survery	0.196913	0	0.000550901	0	0.985303	0.395273	0.00205383	0.0243485	0.00455917	0.257471	0.050608	0.554487	0.104721	0.000226385	0.0121683	0	0.000680513	0	0	3.70016	0.32381	0.000403615	0	0.370702	0.206627	0.006181	0.0267765	0.000983409	0.0119527	0	0.0671543	0.00868303	0.00509774	0.000676335	0.00412023	0.0376722	0.051607	0.172691	0.155	0.134756	0.151066	0.138845	0.255363	0.0408975	0.0104273	0.501935
2	Aomori	77	Giids rental and leasing services	0.46818	0	0.00546397	0	4.03626	0.199084	0.0633745	0.213962	0.0629717	0.946991	0.0591733	1.27513	6.37754	0	0.118656	0	0.00991593	0	0	0.732033	0.109481	0.0200652	0.297219	2.2211	0.872421	0.110925	1.81362	0.00657471	0.140958	0	0.63556	0.123816	0.205988	0.0243478	0.114423	0.503997	1.71944	5.91924	4.54839	2.54907	2.05168	4.34778	3.38838	0.627913	0.0496822	8.078
2	Aomori	78	Other business services	0.184365	0	0.00282003	0	2.62597	0.122824	0.0251154	0.302746	0.0455649	0.589662	0.0276138	1.02987	9.28435	0.000386284	0.0943768	0	0.00735407	0.00054432	0	0.750828	0.387197	0.0137739	0.0433693	1.67422	0.925657	0.166111	1.44164	0.0015102	0.0877339	0	0.272142	0.126946	0.0397639	0.0600101	0.0567119	0.349273	0.623008	1.79201	1.37614	0.48175	0.907514	1.05313	2.33145	0.294417	0.0392474	1.99735
2	Aomori	79	Personal services	6.98249	0	0	0	3.03226	0.106926	0	0.500386	0.0499226	0.460345	0	0.748589	5.61829	0	0.0403763	0	0	0	0	1.02413	0.308705	0	0	1.20691	0.417486	0.0411259	0.873363	0	0.0131633	0	0.536181	0.0504205	0.186066	0	0.0350904	0.235582	0.659275	1.17013	0.963296	0.446754	0.669909	1.43858	0.915198	0.292376	0	1.88841
2	Aomori	80	Activities not elsewhere classified	0	0	0	0	0	0	0	0	0	0	0	0	0	0	0	0	0	0	0	0	0	0	0	0	0	0	0	0	0	0	0	0	0	0	0	0	0	0	0	0	0	0	0	0	0	0
3	Iwate	1	Agriculture, forestry and fishery	59.8254	0	0	0	1751.03	48.57	4.51934	0.184987	50.9114	0	0.190706	0.106662	0	0	0.276143	0	0.165158	0	0	2.59417	3.58586	0	1.49809	0	296.344	0	0	0	0.870263	0	0	0	0	0	0.0399986	0	0	0	0	0	0	0	0	0	0	0
3	Iwate	2	Metallic ores	0	0	0	0	0	0	0	0	0	0	0	0	0	0	0.00153534	0	0	0	0	0	0	0	0	0	0	0	0	0	5.94174e-05	0	0	0	0	0.0127598	0	0	0	0	0	0	0	0	0	0	0	0
3	Iwate	3	Non-metallic ores	0	0	0.197956	0	0	0	0	0	0	0	0.521468	0	0	0	1.76187	0	0.0308417	0	0	0.508659	0.125164	-0.384138	0.205701	0	0.686692	49.3729	16.8088	0.481348	8.34982	0	0	0.321975	0	0.0306523	0.0186734	0.143274	0.275655	0	0	0.950961	0	0	0	0	0	0
3	Iwate	4	Coal mining, crude petroleum and natural gas	0	0	0	0	0	0	0	0	0	0	0	0	0	0	0	0	0	0	0	0	0	0	0	0	0	0	0	0	0	0	0	0	0	0	0	0	0	0	0	0	0	0	0	0	0	0
3	Iwate	5	Food and Tobacco	11.8339	0	0	0	2694.39	74.7267	0	2.33255	0.0186373	0	0.107072	0	0	0	0.0226102	0	0.0162275	0	0	12.0307	2.60129	0	0	0.0321835	0	0	0	0	0.0884556	0	0	0	0	0	0	0	0	0	0	0	0	0	0	0	0	0
3	Iwate	6	Beverage	2.81858	0	0	0	9.54263	42.9456	0	0	0	0	0	0	0	0	0	0	0.0315415	0	0	0	0.0320009	0	0	0	0	0	0	0	0	0	0	0	0	0	0	0	0	0	0	0	0	0	0	0	0	0
3	Iwate	7	Textile products	0.161303	0	0	0	0	0.00305726	1.45203	21.6603	0	0.358015	0.0259682	0.16588	0.285261	0	0	0	0	0	0	0.00260286	0	0	0	0.0985951	1.50404	0.00658494	0	0	0.0391424	0	0	0	0	0	0.00802651	0.00384903	0.021543	0.0130562	0.274204	0	0	0	0	0.00145386	0.0246445	0.0385671
3	Iwate	8	Wearing aparel and other textile products	12.9744	0	0.0402163	0	35.0318	0.824875	3.2152	16.059	0.893871	2.68321	0.286814	6.57703	5.01014	0	0.207654	0	0.0662376	0	0	4.05759	0.772828	0	1.54622	0.952412	2.03867	0.535823	2.32902	0	1.20353	0	2.58734	0.259311	0.815165	0.0329155	0.380989	0.884652	3.25608	4.92524	2.88689	3.94853	2.73859	8.55296	4.7237	0.668301	0.201494	12.5255
3	Iwate	9	Timber and wooden products	2.63791	0	0	0	12.7341	0.55452	0	0.91176	103.862	208.297	25.0687	80.9195	1.17591	0	0	0	0	0	0	1.23927	0	0	0	1.34123	0.0492065	2.11147	0.0943599	0.260607	1.05811	0	0	0.915185	0	0	2.00177	2.44346	5.31168	1.18406	1.38769	0.463374	5.87935	1.23019	1.37794	0.362585	0.0507952	1.57393
3	Iwate	10	Furniture and fixtures	0.024788	0	0	0	2.06715	0.0716475	0.0234411	0.413224	0.0178408	13.8067	0.025624	0.627005	1.10744	0	0.0324657	0	0.0310678	0	0	0.86618	0.126082	0	0	0.677776	0.193277	0.0220456	0.214577	0.00673441	0.127012	0	0.255486	0.054056	0	0	0.0282154	0.0360812	0.176703	0.229482	0.504902	0.175621	0.193365	0.30354	0.474769	0.0545143	0.0315027	2.91937
3	Iwate	11	Pulp, paper, paperboard, building paper	0.0174148	0	0	0	0.968186	0.0201344	0.142728	0.0407454	0.288284	2.18444	25.9052	79.5021	77.2152	0	0.243295	0	0	0.0306952	0	2.36558	0.0221447	0	0	0.714259	0.200107	0.0991245	0	0	0.317272	0	0.089746	0	0.0700735	0	0.0396456	0	0.0177347	0.0214964	0	0.0672998	0	1.46395	0.0222366	0.0191496	0.0147549	0.634987
3	Iwate	12	Paper products	2.2029	0	0	0	73.6015	6.80446	0.117461	0.871842	0.0236643	3.26227	0	2.63916	3.41555	0.0137089	0.181822	0	0.0274726	0	0	45.374	2.07652	0	0	1.23955	0.332825	0.881149	0.517488	0.0774161	0.131033	0	0	0	0.0440995	0	0.00831676	0	1.08262	0.351737	0.0304414	0.310595	0.378617	0.529572	0.545775	0.180772	0.0835713	1.8862
3	Iwate	13	Publishing, printing	0.0612691	0	0.00148013	0	43.3015	0.897271	0.0386267	1.92329	0.0440975	1.26733	0.00351864	14.4095	579.393	0	0.112939	0	0	0	0	14.5746	0.268356	0.00506057	0.0113815	0.126915	0.206736	0.406865	0.0857174	0	0.0697644	0	0.24558	0.0964974	0.0182617	0.00423998	0.0671579	0.138729	1.53906	1.33611	1.19125	0.543705	4.12702	0.531721	1.37343	0.0524006	0.196107	7.70985
3	Iwate	14	Chemical fertilizer	10.6377	0	0	0	0	0.0569394	0	0	0	0	0	0	0	0.739226	2.5371	0	0.401214	0.0434024	0	4.41137	1.2838	0	0	0	0	0	0	0	0.0280386	0	2.91868	0	0	0	0	0	0	0	0	0	0	0	0	0.0270772	0	0
3	Iwate	15	Basic inorganic chemical products	0	0	0	0	0.820896	0.0246587	0.0407865	0.000415842	0	0.00353874	0.0106562	0.0287726	0.00309873	0.00711413	0.63131	0	0.07262	0.00125308	0	2.86354	0.433027	0	0	0.157279	0.552578	0.13809	0.0223789	0	0.00202377	0	0.217992	0.00232554	0.000953546	0.000885572	0.00107898	0.0238011	0.0195478	0.0149184	0.0151391	0.0201477	0.00871486	0.0221172	0.044481	0.0191529	0	0.0575476
3	Iwate	16	Basic organic chemical products	0	0	0	0	0	0	0	0	0	0	0	0	0.000389576	0	0	0	0.000462094	0	0	0.00629045	0.000156275	0	0	0	1.83397e-05	0	0	0	0	0	0	0	0	0	0	0	0	2.75818e-05	0	0	0	0	0	0	0	0
3	Iwate	17	Organic chemical products	0.00756384	0	0	0	0.0710203	0.0125929	0.0223805	0.000117981	0.000653275	0.000602396	0.00291907	0.00122448	0.008352	0	0.0105671	0	0.116668	0.00755476	0	0.94704	0.199353	0	0.000337217	0.132113	0.171343	0.00154273	0	0	0.000574174	0	0	0	0	6.28126e-05	0.00114796	0.000146798	0.00102704	0.00460605	9.33738e-05	0.00116922	0.0166334	0.00226967	0.000515099	0.000277243	0.00170894	0.00183864
3	Iwate	18	Synthetic resins	0	0	0	0	0	0	0.000140099	0	0	0.000619436	0.000689153	0.00179874	0.00038744	0	0	0	0	0	0	0.123719	0	0	0	0.176045	0	0	0	0	0.000177125	0	0	0	0	0	0.00010118	0	0	0	0	0.000171756	0.000594345	0.00547185	0	0.000219923	0.000225936	0.00492649
3	Iwate	19	Synthetic fibers	0	0	0	0	0	0	0	0	0	0	0	0	0	0	0	0	0	0	0	0	0	0	0	0	0	0	0	0	0	0	0	0	0	0	0	0	0	0	0	0	0	0	0	0	0	0
3	Iwate	20	Final chemical products	0.119969	0	0.00428238	0	0.857643	0.0476146	0.071118	0.098451	0.175269	0.395727	0.111984	1.84067	31.7997	0	0.322072	0	0.0594715	0	0	15.6282	1.03713	0.0133105	0.104775	0.607544	0.214566	0.0127399	0.0873644	0	0.139661	0	0.0415242	0.0156191	0.00480326	0	0.0176641	0.0417016	0.266226	0.110512	0.102785	0.0784233	0.818118	0.136299	0.115461	0.0620216	0.00303416	0.325138
3	Iwate	21	Medicaments	6.51397	0	0	0	0.376452	0	0	0.00514889	0	0	0	0	0	0	0	0	0	0	0	1.7676	10.5834	0	0	0	0	0	0	0	0	0	0	0	0	0	0	0	0	0	0	0	0	0	0	0	0	0
3	Iwate	22	Petroleum refinery products	0	0	0	0	0	0	0	0	0	0	0	0	0	0	0	0	0	0	0	0	0	0	0	0	0	0	0	0	0	0	0	0	0	0	0	0	0	0	0	0	0	0	0	0	0	0
3	Iwate	23	Coal products	0	0	0	0	0	0	0	0	0	0	5.09456e-05	0	0	0	0.000200817	0	0.000247076	0	0	3.23406e-05	0	0	0	0	0	0	0	0	0.000692107	0	0.0091432	0.00322422	0	0.000409265	0.000149594	4.78243e-05	0	0	0.000121678	4.23236e-05	0	0	0	0	0	4.79197e-05
3	Iwate	24	Plastic products	1.267	0	0	0	25.8627	3.1513	0.0469866	1.32028	0.199239	3.254	0.236632	11.0311	97.9887	0.0133178	0.288194	0	0.0066722	0	0	14.5884	2.31513	0	0	71.735	5.01599	0.193171	0.0502725	0	0.0848634	0	0	0	0	0.00663124	0.79987	0.340951	0.6614	0.788545	6.88064	0.877774	5.75454	4.00295	2.76658	3.72888	0.243562	22.5554
3	Iwate	25	Rubber products	0.818234	0	0.00177015	0	0.731184	0.0141196	0.0128321	0.197633	0.00878972	0.121577	0.00841623	0.164752	0.891606	0	0.00355447	0	0.00765319	0	0	0.104182	0.0439998	0	0.0136116	0.101189	3.43137	0	0.237063	0	0.0973405	0	0.346147	0.00443869	0.00546002	0	0.00308913	0.237018	0.169969	2.01498	1.81665	0.325122	2.3862	0.980812	0.862858	0.185767	0.0413884	2.21163
3	Iwate	26	Glass and glass products	0.0175866	0	0	0	4.53769	12.7081	0	0	0	5.79508	0	0	0.0574908	0	0.168915	0	0	0	0	16.757	2.05741	0	0	1.79233	0.086606	2.04584	0.0276797	0	0.260326	0	0	0	0	0	0	0.127995	0.214916	0.238792	0.0325653	0	1.2151	0.069845	2.3691	1.1313	0.0596015	0.615599
3	Iwate	27	Cement and cement products	0	0	0	0	0	0	0	0	0	0	0	0	0	0	0	0	0	0	0	0	0	0	0	0	0	0	28.7992	0	0.0175084	0	0	0	0	0	0	0	0	0	0	0	0	0	0	0	0	0
3	Iwate	28	Pottery, china and earthenware	0	0	0	0	0.0373935	0	0	0	0	0.0356098	0	0	0	0	0.0010411	0	0	0	0	0.00117365	0	0	0	0.00148191	0	0	0.00187663	0.00323935	0	0	0	0	0	0	0	0	0.00242848	0.00147179	0	0	0	0.0457751	0.00304494	0.000655554	0	0.0417365
3	Iwate	29	Other ceramic, stone and clay products	0.0857061	0	0	0	0.325803	0	0	0	0	0.142204	0.0246102	0	0.0311305	0	0.73172	0	0	0	0	0.121857	0.0726559	0	0.891571	0.118356	0.031264	0.352326	25.1652	0.0569181	3.09034	0	0.368066	0.290737	0	0.00593109	0.0650379	0.207922	0.75643	6.21828	0.925768	0.736027	0.0636736	0.724886	0.29183	0.28273	0.00806835	0.493064
3	Iwate	30	Pig iron and crude steel	0	0	0	0	0	0	0	0	0	0	0	0	0	0	0	0	0	0	0	0	0	0	0	0	0	0	0	0	0	0	0	0	0	0	0	0	0	0	0	0	0	0	0	0	0	0
3	Iwate	31	steel products	0.0139511	0	0	0	0	0	0	0	0.0502053	6.60401	0	0	0	0	0	0	0	0	0	0	0	0	0	0.684899	0.818707	0	1.86641	0	0.0317709	0	148.896	1.76457	96.9376	0	0.058227	10.9354	45.9323	14.9476	16.1975	4.96009	2.80623	11.363	1.75911	2.10168	0.301414	2.55871
3	Iwate	32	Cast and forged steel products	0	0	0	0	0	0	0	0	0	0.280892	0	0	0	0	0	0	0	0	0	0	0	0	0	0	0	0	0	0	0.0160639	0	0	0	0	0	0.0214114	3.2035	2.47112	29.6391	15.0472	15.7744	3.89897	5.86438	1.17091	0.201671	0.0239059	0.329219
3	Iwate	33	Other iron or steel products	0	0	0	0	0	0	0	0	0	28.3301	0	0	0	0	0.0277321	0	0	0	0	0.0468943	0	0	0	0.0394741	0	0	0.52488	0	0.180823	0	0	0.450201	0	0	0.0602539	45.5834	88.2509	34.598	23.26	4.3368	6.53019	8.89269	0.101387	2.16532	1.00911	12.6577
3	Iwate	34	Non-ferrous metals	0	0	0	0	0	0	0	0	0	0.305735	0.00529116	0	-3.7704	0	5.84582	0	0.153966	0	0	16.576	0	0	0	0.31808	-0.00840214	0.509852	0	0.0278121	0.483744	0	49.9597	0.145108	-0.109844	9.32791	65.9922	-0.551336	10.3417	-0.770815	1.29849	0.791223	-0.23957	3.37448	0.516323	40.2205	0.0173468	1.59758
3	Iwate	35	Non-ferrous metal products	0	0	0	0	0.727012	0.0387921	0	0	0.00965954	1.75695	0	0.0543167	0.709285	0	0.0292966	0	0	0	0	0.191554	0.0127996	0	0	0.517092	0.346984	0.0119362	0	0	0.0496661	0	0	0	0	0.0459739	5.15843	2.86194	5.09114	6.57688	3.78368	3.47498	1.87701	7.43109	6.00222	11.2197	0.204678	27.6195
3	Iwate	36	Metal products for construction and architecture	0.0227452	0	0	0	0	0	0	0	0	0.226433	0	0	0	0	0	0	0	0	0	0	0	0	0	0	0	0	0	0	0	0	0	0	0	0	0	3.8074	0.579076	0.14038	0	0.117199	0	0	0	0	0	0.0497608
3	Iwate	37	Other metal products	0.734071	0	0.0118224	0	29.4552	17.4142	0	4.24605	3.63965	31.6401	0.182681	1.87056	3.67359	0	1.2107	0	0.238529	0	0	24.6475	2.4719	0.0808415	0.409087	1.89228	12.6747	0.831791	1.66886	0	4.28762	0	0	0.830052	0.0364659	0	0.618942	48.5973	111.358	59.166	43.17	21.8891	36.0848	18.9138	13.8689	2.73549	0.990508	27.0237
3	Iwate	38	General industrial machinery	0	0	0	0	0	0	0	0	0	0.120907	0	0	0	0	0	0	0	0	0	0	0	0	0	2.36027	0	0.00785564	0.0173776	0	0.144577	0	0	0.0842717	0.118471	0	0.0167569	0.0642851	0.483486	212.458	28.265	6.01622	7.77618	2.31671	2.19225	0.0364226	0.140319	0.426738
3	Iwate	39	Special industrial machinery	0	0	0	0	0	0	0	0	0	0	0	0	0	0	0	0	0	0	0	0	0	0	0	0	0	0	0	0	0	0	0	0	0	0	0	0	0	1.94194	798.326	0	0.109574	0	0.0627755	0.486544	0	0
3	Iwate	40	Other general machines	0	0	0	0	0	0	0	0	0	2.64366	0	0	0	0	0	0	0	0	0	0.161354	0	0	0	0.448214	0	0.0233261	0	0	0.130657	0	0	0.178737	0	0	0.0497571	0.334048	1.00161	63.1712	46.0772	127.499	5.07837	5.72898	3.97689	0.360504	0.27777	3.46668
3	Iwate	41	Machinery for office and service industry	0	0	0	0	0	0	0	0	0	0	0	0	0	0	0	0	0	0	0	0	0	0	0	0	0	0	0	0	0	0	0	0	0	0	0	0	0	0	0	0	53.5426	0	0	0	0	0
3	Iwate	42	Industrial electric equipment	0.335878	0	0	0	0	0	0	0	0	0.059007	0	0	0	0	0	0	0	0	0	0	0	0	0	0	0	0	0	0	0	0	0	0	0	0	0	0	0	22.1688	27.3109	0.229059	19.992	96.6973	31.1439	4.7905	0.703068	21.1367
3	Iwate	43	Applied electric equipment and electric mesuring instruments	0	0	0	0	0	0	0	0	0	0	0	0	0	0	0	0	0	0	0	0	0	0	0	0	0	0	0	0	0	0	0	0	0	0	0	0	0	2.04657	8.57662	0.568232	1.50863	11.488	78.8359	0	0	1.96338
3	Iwate	44	Other electric equipment	0.0316401	0	0.000573267	0	0	0	0	0	0	0.0236238	0	0	0	0	0	0	0	0	0	0.0155721	0	0	0	0	0	0	0	0	0	0	0	0	0	0	0	0	0.048332	0.152968	0.439413	0.0917051	0.384917	0.980835	0.584125	3.57631	0.0335092	3.83982
3	Iwate	45	Household electric and electric applications	0	0	0	0	0	0	0	0	0	0	0	0	0	0	0	0	0	0	0	0	0	0	0	0	0	0	0	0	0	0	0	0	0	0	0	0	0	0	0	0	0	0	0	0	0.310033	0
3	Iwate	46	Communication equipment	0	0	0	0	0	0	0	0	0	0	0	0	0.243668	0	0	0	0	0	0	0	0.0710876	0	0	0	0	0	0	0	0	0	0	0	0	0	0	0	0	1.38013	0.258796	0	0	0.0370038	2.99808	0.0307364	0	51.8568
3	Iwate	47	Electric computing equipment and accessory equipment	0	0	0	0	0	0	0	0	0	0	0	0	0	0	0	0	0	0	0	0	0	0	0	0	0	0	0	0	0	0	0	0	0	0	0	0	0	0	2.27425	0	0	0	0	0	0	0.440322
3	Iwate	48	Semiconductor devices and integrated circuits	0	0	0	0	0	0	0	0	0	0	0	0	0	0	0	0	0	0	0	0	0	0	0	0	0	0	0	0	0	0	0	0	0	0	0	0	1.80679	6.57005	42.709	11.5906	707.68	439.466	2905.66	21.8783	26.306	3774.29
3	Iwate	49	Other electrical equipment	0	0	0	0	0	0	0	0	0	0	0	0.0611239	2.9623	0	0	0	0	0	0	0	0	0	0	0	0	0	0	0	0	0	0	0	0	0	0.0458433	0	0.123043	8.79931	18.4857	0.505833	74.9972	52.6435	450.238	1.39502	2.53362	588.334
3	Iwate	50	Passenger motor cars	0	0	0	0	0	0	0	0	0	0	0	0	0	0	0	0	0	0	0	0	0	0	0	0	0	0	0	0	0	0	0	0	0	0	0	0	0	0	0	0	0	0	0	0	0	0
3	Iwate	51	Other cars	0	0	0	0	0	0	0	0	0	0	0	0	0	0	0	0	0	0	0	0	0	0	0	0	0	0	0	0	0	0	0	0	0	0	0	0	0	0	0	0	0	0	0	0	0	0
3	Iwate	52	Motor vheicle parts and accessories	0	0	0	0	0	0	0	0	0	0	0	0	0	0	0	0	0	0	0	0	0	0	0	0	0	0	0	0	0	0	0	0	0	0	0	0	0	0	0.0337364	0	0	0	0	0	0	0
3	Iwate	53	Other transportation equipment	1.59095	0	0	0	0	0	0	0	0	0	0	0	0	0	0	0	0	0	0	0	0	0	0	0	0	0	0	0	0	0	0	0	0	0	0	0	0	0	0	0	0	0	0	0	0	0
3	Iwate	54	Precision instruments	1.64709	0	0	0	0	0	0.0138453	0.0128456	0.0158062	0	0.0227019	0.0444402	0.0478609	0	0	0	0	0	0	0.0648509	0.0279258	0	0	0.245652	0	0	0	0	0	0	0	0	0	0	0.0166652	0.0319665	0.0447292	5.55719	15.2904	0.0848692	4.77232	2.50027	4.1642	0.0120744	0.0186068	5.01274
3	Iwate	55	Miscellaneous manufacturing products	0.545767	0	0.00659227	0	1.19582	0.186962	0.0191153	12.6392	0.167307	2.59587	0.0208953	0.184067	0.396471	0	0	0	0.0316682	0	0	0.258658	0	0	0.0844856	0.125613	0.0746571	0.266065	0.0954432	0.0274582	0.667474	0	0	0.275503	0.0135559	0	0.122712	0.235382	0.164679	2.10837	0.664379	0.104154	0	0.107038	0.451681	0.0277839	0.00856306	1.82048
3	Iwate	56	Reuse and recycling	0	0	0	0	0	4.90099	0	0	0	0	0.200583	0	0	0	0.18246	0	0	0	0	0	0	0	0	5.3427	0.0245014	0.297355	0.375877	0.0162205	0.0169957	0	0.999964	4.42678	0.400395	2.84467	6.61475	0	0	0	0	0	0	0	0	0	0	0
3	Iwate	57	Building construction and repair of construction	0	0	0	0	0	0	0	0	0	0	0	0	0	0	0	0	0	0	0	0	0	0	0	0	0	0	0	0	0	0	0	0	0	0	0	0	0	0	0	0	0	0	0	0	0	0
3	Iwate	58	Public construction	0	0	0	0	0	0	0	0	0	0	0	0	0	0	0	0	0	0	0	0	0	0	0	0	0	0	0	0	0	0	0	0	0	0	0	0	0	0	0	0	0	0	0	0	0	0
3	Iwate	59	Other civil enginnering and construction	0	0	0	0	0	0	0	0	0	0	0	0	0	0	0	0	0	0	0	0	0	0	0	0	0	0	0	0	0	0	0	0	0	0	0	0	0	0	0	0	0	0	0	0	0	0
3	Iwate	60	Electricity	0	0	0	0	0	0	0	0	0	0	0	0	0	0	0	0	0	0	0	0	0	0	0	0	0	0	0	0	0	0	0	0	0	0	0	0	0	0	0	0	0	0	0	0	0	0
3	Iwate	61	Gas supply and heat supply	0	0	0	0	0	0	0	0	0	0	0	0	0	0	0	0	0	0	0	0	0	0	0	0	0	0	0	0	0	0	0	0	0	0	0	0	0	0	0	0	0	0	0	0	0	0
3	Iwate	62	Water supply and waste management services	0	0	0	0	0	0	0	0	0	0	0	0	0	0	0	0	0	0	0	0	0	0	0	0	0	0	0	0	0	0	0	0	0	0	0	0	0	0	0	0	0	0	0	0	0	0
3	Iwate	63	Commerce	29.1214	0	0.0745956	0	732.596	34.0418	2.93646	47.6047	8.10402	48.822	8.03909	96.694	378.494	0.0520191	5.06555	0	2.17614	0.100789	0	115.397	18.6146	0.494629	4.79742	58.9362	32.8018	2.9774	52.4618	0.158178	5.9547	0	59.3924	5.1467	40.677	1.24975	6.09076	26.5896	52.6001	95.6994	115.8	31.2589	72.9347	50.4987	105.473	22.5619	2.84523	178.59
3	Iwate	64	Financial and insurance	0.145376	0	0.000854262	0	0.51682	0.0535828	0.0239262	0.281114	0.0163247	0.188107	0.0200311	0.331223	0.833318	0.000111697	0.0145026	0	0.00285396	7.86971e-05	0	0.121211	0.0287283	0.0070363	0.00179151	0.10266	0.0989436	0.0220465	0.433163	0.00135858	0.0281651	0	0.12195	0.0139235	0.0540167	0.0259173	0.00813157	0.0770785	0.0903011	0.272809	0.198093	0.207514	0.0784158	0.119397	0.0926428	0.0129614	0.00446381	0.204542
3	Iwate	65	Real estate agencies and rental services	0	0	0	0	0	0	0	0	0	0	0	0	0	0	0	0	0	0	0	0	0	0	0	0	0	0	0	0	0	0	0	0	0	0	0	0	0	0	0	0	0	0	0	0	0	0
3	Iwate	66	House rent	0	0	0	0	0	0	0	0	0	0	0	0	0	0	0	0	0	0	0	0	0	0	0	0	0	0	0	0	0	0	0	0	0	0	0	0	0	0	0	0	0	0	0	0	0	0
3	Iwate	67	Transport	53.3562	0	1.4376	0	170.714	17.1724	1.44802	10.5524	7.21358	15.2436	1.92103	24.0278	176.773	0	2.88063	0	0.601915	0	0	41.1609	10.5409	1.53147	0.62836	20.4323	7.24353	2.47604	168.416	0.075637	28.3563	0	48.4582	1.69995	8.30843	1.20511	2.84153	19.5125	30.9318	41.8914	32.8647	19.2047	20.306	15.6177	35.9843	3.97978	0.601494	76.8148
3	Iwate	68	Communication	0.449482	0	0.00297528	0	0.514699	0.031643	0.0146	0.310324	0.00303052	0.411839	0.0168664	0.462237	2.85155	0	0.0238974	0	0.00329833	0	0	0.495281	1.28635	0.0399076	0.0422372	0.490612	0.501968	0.0355754	0.0844958	0	0.0287666	0	0.181729	0.0539456	0.0127069	0.0544162	0.0519222	0.383058	0.405211	1.4176	0.650062	0.425782	0.403536	0.560897	0.522187	0.0688718	0.0107024	0.827521
3	Iwate	69	Broadcasting	0	0	0	0	0	0	0	0	0	0	0	0	0	0	0	0	0	0	0	0	0	0	0	0	0	0	0	0	0	0	0	0	0	0	0	0	0	0	0	0	0	0	0	0	0	0
3	Iwate	70	Information services	0	0	0	0	0	0	0	0	0	0	0	0	0	0	0	0	0	0	0	0	0	0	0	0	0	0	0	0	0	0	0	0	0	0	0	0	0	0	0	0	0	0	0	0	0	0
3	Iwate	71	﻿Internet based services	0	0	0	0	0	0	0	0	0	0	0	0	0	0	0	0	0	0	0	0	0	0	0	0	0	0	0	0	0	0	0	0	0	0	0	0	0	0	0	0	0	0	0	0	0	0
3	Iwate	72	Image information production and distribution industry	0.0014632	0	9.3245e-05	0	0.0118317	0.000262506	0.000349902	0.00535653	0.00019973	0.00416903	0.00018255	0.00760647	0.0339225	0	0.000528666	0	7.90473e-05	0	0	0.00720135	0.0015719	1.87533e-05	0.000253062	0.00354305	0.00505222	0.000547455	0.0108001	1.37077e-05	0.000775592	0	0.00266518	0.000247567	0.000439879	9.42744e-05	0.000153152	0.00187278	0.00709073	0.00485788	0.00448458	0.00211234	0.00466685	0.0071136	0.0117093	0.00166444	0.000213743	0.0143498
3	Iwate	73	Public administration	0	0	0	0	0	0	0	0	0	0	0	0	0	0	0	0	0	0	0	0	0	0	0	0	0	0	0	0	0	0	0	0	0	0	0	0	0	0	0	0	0	0	0	0	0	0
3	Iwate	74	Education and Research	0	0	0	0	0	0	0	0	0	0	0	0	0	0	0	0	0	0	0	0	0	0	0	0	0	0	0	0	0	0	0	0	0	0	0	0	0	0	0	0	0	0	0	0	0	0
3	Iwate	75	Medical service, health and social security and nursing care	0	0	0	0	0	0	0	0	0	0	0	0	0	0	0	0	0	0	0	0	0	0	0	0	0	0	0	0	0	0	0	0	0	0	0	0	0	0	0	0	0	0	0	0	0	0
3	Iwate	76	Advertising and survery	1.01439	0	0.00283794	0	5.07574	2.03623	0.0105802	0.12543	0.0234864	1.32635	0.260704	2.85641	0.539467	0.00116621	0.0626843	0	0.00350563	0	0	19.0612	1.66809	0.0020792	0	1.90965	1.06443	0.0318411	0.137938	0.00506598	0.0615737	0	0.345942	0.0447302	0.0262608	0.00348411	0.0212252	0.194067	0.265851	0.889611	0.798474	0.694186	0.778208	0.715255	1.31549	0.210682	0.0537155	2.58569
3	Iwate	77	Giids rental and leasing services	0.495803	0	0.00578635	0	4.2744	0.21083	0.0671137	0.226586	0.0666871	1.00286	0.0626646	1.35036	6.75382	0	0.125657	0	0.010501	0	0	0.775224	0.11594	0.021249	0.314756	2.35215	0.923895	0.11747	1.92062	0.00696263	0.149274	0	0.673059	0.131122	0.218142	0.0257843	0.121174	0.533733	1.82089	6.26849	4.81676	2.69947	2.17273	4.60431	3.5883	0.66496	0.0526135	8.55461
3	Iwate	78	Other business services	0	0	0	0	0	0	0	0	0	0	0	0	0	0	0	0	0	0	0	0	0	0	0	0	0	0	0	0	0	0	0	0	0	0	0	0	0	0	0	0	0	0	0	0	0	0
3	Iwate	79	Personal services	3.9383	0	0	0	1.71027	0.060309	0	0.28223	0.0281576	0.259646	0	0.422223	3.16886	0	0.0227732	0	0	0	0	0.577635	0.174117	0	0	0.680728	0.235472	0.023196	0.492599	0	0.00742446	0	0.30242	0.0284384	0.104946	0	0.0197919	0.132874	0.371848	0.659981	0.543323	0.25198	0.377846	0.811395	0.516195	0.164907	0	1.06511
3	Iwate	80	Activities not elsewhere classified	1.14258	0	0.00317417	0	4.86114	0.306489	0.0295496	0.649447	0.655341	0.24937	0.153299	3.15329	7.80012	0	0.0536734	0	0.0240761	0.000677168	0	0.248078	0.335624	0.0102813	0.107908	1.14312	0.393528	0.0527564	5.51953	0.0104377	0.182858	0	0.837495	0.28402	0.817264	0.072742	0.0723024	0.184544	1.12601	3.9257	2.18261	0.913589	1.2065	0.515215	0.778035	0.376412	0.0182284	1.20753
4	Miyagi	1	Agriculture, forestry and fishery	62.2703	0	0	0	1822.59	50.5549	4.70403	0.192547	52.992	0	0.198499	0.111021	0	0	0.287428	0	0.171907	0	0	2.70019	3.73241	0	1.55931	0	308.454	0	0	0	0.905828	0	0	0	0	0	0.0416332	0	0	0	0	0	0	0	0	0	0	0
4	Miyagi	2	Metallic ores	0	0	0	0	0	0	0	0	0	0	0	0	0	0	0	0	0	0	0	0	0	0	0	0	0	0	0	0	0	0	0	0	0	0	0	0	0	0	0	0	0	0	0	0	0	0
4	Miyagi	3	Non-metallic ores	0	0	0.0656143	0	0	0	0	0	0	0	0.172845	0	0	0	0.583987	0	0.0102227	0	0	0.168599	0.0414865	-0.127326	0.0681813	0	0.22761	16.3651	5.57143	0.159547	2.76761	0	0	0.106721	0	0.01016	0.00618944	0.0474894	0.0913681	0	0	0.315204	0	0	0	0	0	0
4	Miyagi	4	Coal mining, crude petroleum and natural gas	0	0	0	0	0	0	0	0	0	0	0	0	0	0	0	0	0	0	0	0	0	0	0	0	0	0	0	0	0	0	0	0	0	0	0	0	0	0	0	0	0	0	0	0	0	0
4	Miyagi	5	Food and Tobacco	24.9176	0	0	0	5673.35	157.345	0	4.91145	0.039243	0	0.225453	0	0	0	0.0476083	0	0.0341688	0	0	25.3321	5.47731	0	0	0.067766	0	0	0	0	0.186253	0	0	0	0	0	0	0	0	0	0	0	0	0	0	0	0	0
4	Miyagi	6	Beverage	1.87896	0	0	0	6.36146	28.629	0	0	0	0	0	0	0	0	0	0	0.0210267	0	0	0	0.0213329	0	0	0	0	0	0	0	0	0	0	0	0	0	0	0	0	0	0	0	0	0	0	0	0	0
4	Miyagi	7	Textile products	0.0969143	0	0	0	0	0.00183687	0.872413	13.014	0	0.215103	0.0156023	0.0996642	0.171391	0	0	0	0	0	0	0.00156386	0	0	0	0.0592381	0.903663	0.00395638	0	0	0.0235176	0	0	0	0	0	0.0048225	0.00231259	0.0129435	0.00784447	0.164748	0	0	0	0	0.000873509	0.014807	0.023172
4	Miyagi	8	Wearing aparel and other textile products	7.4748	0	0.0231695	0	20.1825	0.475227	1.85234	9.25194	0.514978	1.54585	0.165239	3.78916	2.88644	0	0.119634	0	0.0381608	0	0	2.33766	0.445242	0	0.890809	0.548704	1.17452	0.308698	1.34179	0	0.693379	0	1.49062	0.149394	0.469633	0.0189633	0.219496	0.509666	1.87589	2.83753	1.6632	2.27483	1.57776	4.92753	2.72142	0.385022	0.116085	7.21617
4	Miyagi	9	Timber and wooden products	3.09185	0	0	0	14.9254	0.649943	0	1.06866	121.735	244.141	29.3826	94.8442	1.37827	0	0	0	0	0	0	1.45252	0	0	0	1.57203	0.0576741	2.47481	0.110598	0.305453	1.24019	0	0	1.07267	0	0	2.34624	2.86394	6.22572	1.38781	1.62648	0.543112	6.89108	1.44188	1.61506	0.424979	0.0595362	1.84477
4	Miyagi	10	Furniture and fixtures	0.0306412	0	0	0	2.55527	0.0885657	0.0289763	0.510799	0.0220535	17.0669	0.0316746	0.775061	1.36894	0	0.0401319	0	0.0384039	0	0	1.07071	0.155853	0	0	0.83782	0.238916	0.0272513	0.265246	0.00832462	0.157004	0	0.315814	0.0668204	0	0	0.034878	0.0446011	0.218428	0.28367	0.624126	0.217091	0.239025	0.375215	0.586877	0.0673869	0.0389415	3.60873
4	Miyagi	11	Pulp, paper, paperboard, building paper	0.126078	0	0	0	7.00938	0.145767	1.03331	0.294985	2.08709	15.8147	187.546	575.572	559.016	0	1.76138	0	0	0.222224	0	17.1261	0.160321	0	0	5.17103	1.44872	0.717633	0	0	2.29696	0	0.649735	0	0.507312	0	0.287023	0	0.128394	0.155627	0	0.487231	0	10.5986	0.160987	0.138637	0.106821	4.59712
4	Miyagi	12	Paper products	3.32928	0	0	0	111.235	10.2837	0.177521	1.31763	0.0357642	4.93033	0	3.98861	5.16198	0.0207185	0.27479	0	0.0415197	0	0	68.5746	3.13828	0	0	1.87335	0.503004	1.3317	0.782089	0.117	0.198033	0	0	0	0.0666483	0	0.0125693	0	1.63618	0.531586	0.0460066	0.469408	0.57221	0.800351	0.824839	0.273203	0.126303	2.85064
4	Miyagi	13	Publishing, printing	0.216311	0	0.00522559	0	152.876	3.16782	0.136372	6.7902	0.155686	4.47432	0.0124226	50.873	2045.55	0	0.398733	0	0	0	0	51.4558	0.947432	0.0178664	0.0401823	0.448074	0.729882	1.43644	0.302626	0	0.246304	0	0.867021	0.340685	0.0644732	0.0149693	0.237101	0.489783	5.43368	4.71714	4.20573	1.91956	14.5705	1.87724	4.8489	0.185001	0.692357	27.2197
4	Miyagi	14	Chemical fertilizer	9.35278	0	0	0	0	0.0500618	0	0	0	0	0	0	0	0.649937	2.23065	0	0.352752	0.0381599	0	3.87853	1.12873	0	0	0	0	0	0	0	0.0246519	0	2.56614	0	0	0	0	0	0	0	0	0	0	0	0	0.0238066	0	0
4	Miyagi	15	Basic inorganic chemical products	0	0	0	0	16.7813	0.504089	0.833785	0.00850092	0	0.0723413	0.217841	0.588188	0.0633464	0.145432	12.9057	0	1.48455	0.0256163	0	58.5384	8.85223	0	0	3.21521	11.2962	2.82293	0.457485	0	0.0413713	0	4.45635	0.0475402	0.019493	0.0181035	0.0220572	0.486558	0.399609	0.304973	0.309484	0.411872	0.178155	0.452134	0.909311	0.391537	0	1.17643
4	Miyagi	16	Basic organic chemical products	0	0	0	0	0	0	0	0	0	0	0	0	0.149724	0	0	0	0.177594	0	0	2.41757	0.0600604	0	0	0	0.00704839	0	0	0	0	0	0	0	0	0	0	0	0	0.0106004	0	0	0	0	0	0	0	0
4	Miyagi	17	Organic chemical products	0.0226518	0	0	0	0.212688	0.0377125	0.0670241	0.000353323	0.0019564	0.00180403	0.0087419	0.00366702	0.0250122	0	0.0316458	0	0.349392	0.0226246	0	2.83615	0.597012	0	0.00100988	0.395644	0.51313	0.00462011	0	0	0.00171951	0	0	0	0	0.000188108	0.00343786	0.000439624	0.00307572	0.013794	0.000279631	0.00350153	0.049813	0.0067971	0.00154259	0.000830274	0.00511785	0.00550627
4	Miyagi	18	Synthetic resins	0	0	0	0	0	0	0.00125534	0	0	0.00555038	0.00617507	0.0161174	0.0034716	0	0	0	0	0	0	1.10857	0	0	0	1.57743	0	0	0	0	0.0015871	0	0	0	0	0	0.00090661	0	0	0	0	0.001539	0.00532555	0.0490298	0	0.00197059	0.00202447	0.0441432
4	Miyagi	19	Synthetic fibers	0	0	0	0	0	0	0.0519912	0.173941	0	0.00366238	0.000475367	0	0	0	0	0	0	0	0	0	0	0	0.00102509	0.00495333	0.00100648	0	0	0	0	0	0	0	0	0	0	0	0	0	0	0	0	0	0	0	0	0
4	Miyagi	20	Final chemical products	0.333497	0	0.0119045	0	2.38414	0.132363	0.197699	0.273681	0.487224	1.10007	0.3113	5.11683	88.399	0	0.895319	0	0.165323	0	0	43.4443	2.88308	0.0370013	0.291262	1.68889	0.596466	0.0354151	0.242862	0	0.38824	0	0.115432	0.0434191	0.0133524	0	0.0491038	0.115925	0.740074	0.307208	0.285728	0.218006	2.27426	0.378894	0.320966	0.172412	0.00843457	0.903841
4	Miyagi	21	Medicaments	6.62768	0	0	0	0.383023	0	0	0.00523877	0	0	0	0	0	0	0	0	0	0	0	1.79845	10.7682	0	0	0	0	0	0	0	0	0	0	0	0	0	0	0	0	0	0	0	0	0	0	0	0	0
4	Miyagi	22	Petroleum refinery products	32.2137	0	0.0298674	0	81.4639	0.71471	2.64146	0.441936	0.247178	1.36756	0.923032	2.64083	81.8056	0.0859153	6.77702	0	3.61565	0	0	18.2545	0.655057	6.73972	25.8374	0.939037	2.4241	6.5974	3.13506	0.29857	3.20659	0	19.6452	0.449358	0	0.299455	0.781832	2.19953	7.2046	3.30657	1.14468	0.796312	0.306173	1.18207	1.05244	2.03925	0	1.50267
4	Miyagi	23	Coal products	0	0	0	0	0	0	0	0	0	0	0.00603502	0	0	0	0.0237888	0	0.0292686	0	0	0.00383107	0	0	0	0	0	0	0	0	0.0819871	0	1.0831	0.381942	0	0.0484816	0.017721	0.00566528	0	0	0.014414	0.00501365	0	0	0	0	0	0.00567658
4	Miyagi	24	Plastic products	2.0581	0	0	0	42.011	5.11892	0.0763243	2.14464	0.323642	5.28576	0.384382	17.9188	159.172	0.0216332	0.468138	0	0.0108382	0	0	23.6972	3.76067	0	0	116.525	8.1479	0.313784	0.081662	0	0.137851	0	0	0	0	0.0107717	1.2993	0.553836	1.07437	1.2809	11.1768	1.42584	9.34759	6.50234	4.494	6.05715	0.395638	36.6387
4	Miyagi	25	Rubber products	8.6776	0	0.018773	0	7.75441	0.149742	0.136088	2.09595	0.0932175	1.28936	0.0892565	1.74724	9.45574	0	0.0376961	0	0.0811643	0	0	1.10488	0.466631	0	0.144355	1.07314	36.3906	0	2.51412	0	1.03232	0	3.67099	0.0470736	0.0579051	0	0.0327611	2.51364	1.80257	21.3695	19.2661	3.44801	25.3063	10.4018	9.15085	1.97011	0.438935	23.455
4	Miyagi	26	Glass and glass products	0.0380283	0	0	0	9.81207	27.4794	0	0	0	12.531	0	0	0.124315	0	0.365252	0	0	0	0	36.2345	4.44883	0	0	3.87564	0.187272	4.42381	0.0598532	0	0.562916	0	0	0	0	0	0	0.276769	0.464723	0.516352	0.0704176	0	2.62747	0.151029	5.12283	2.44626	0.128879	1.33114
4	Miyagi	27	Cement and cement products	0	0	0	0	0	0	0	0	0	0	0	0	0	0	0	0	0	0	0	0	0	0	0	0	0	0	18.7382	0	0.0113918	0	0	0	0	0	0	0	0	0	0	0	0	0	0	0	0	0
4	Miyagi	28	Pottery, china and earthenware	0	0	0	0	0.764421	0	0	0	0	0.727959	0	0	0	0	0.0212828	0	0	0	0	0.0239924	0	0	0	0.0302941	0	0	0.0383633	0.0662208	0	0	0	0	0	0	0	0	0.0496444	0.0300872	0	0	0	0.935764	0.0622466	0.0134012	0	0.853203
4	Miyagi	29	Other ceramic, stone and clay products	0.281647	0	0	0	1.07065	0	0	0	0	0.467309	0.0808739	0	0.102301	0	2.40457	0	0	0	0	0.400447	0.238762	0	2.92988	0.388942	0.10274	1.15781	82.6977	0.187044	10.1555	0	1.20954	0.955419	0	0.0194907	0.213727	0.683272	2.48578	20.4345	3.04226	2.41873	0.209244	2.38212	0.959011	0.929108	0.0265142	1.6203
4	Miyagi	30	Pig iron and crude steel	0	0	0	0	0	0	0	0	0	0	0	0	0	0	0.0551734	0	0	0	0	0	0	0	0	0	0	0	0	0	0	0	-73.7565	21.393	-18.3488	0	0	-1.83953	-19.176	-6.12283	-13.1047	-1.01747	-0.739376	-1.75666	-0.020171	-0.104224	-0.107074	-0.898559
4	Miyagi	31	steel products	0.0418401	0	0	0	0	0	0	0	0.150569	19.8059	0	0	0	0	0	0	0	0	0	0	0	0	0	2.05406	2.45536	0	5.59747	0	0.0952831	0	446.549	5.29206	290.722	0	0.174627	32.7958	137.754	44.8289	48.5774	14.8756	8.41607	34.0783	5.2757	6.30309	0.903959	7.67373
4	Miyagi	32	Cast and forged steel products	0	0	0	0	0	0	0	0	0	0.178591	0	0	0	0	0	0	0	0	0	0	0	0	0	0	0	0	0	0	0.0102134	0	0	0	0	0	0.0136133	2.03678	1.57113	18.8445	9.567	10.0293	2.47896	3.72856	0.744462	0.128222	0.0151993	0.209317
4	Miyagi	33	Other iron or steel products	0	0	0	0	0	0	0	0	0	43.4537	0	0	0	0	0.0425365	0	0	0	0	0.0719282	0	0	0	0.0605468	0	0	0.805078	0	0.277352	0	0	0.690535	0	0	0.0924195	69.9175	135.362	53.0676	35.6771	6.65193	10.0162	13.6399	0.15551	3.32124	1.5478	19.4149
4	Miyagi	34	Non-ferrous metals	0	0	0	0	0	0	0	0	0	0.028196	0.000487969	0	-0.347719	0	0.539122	0	0.0141993	0	0	1.52869	0	0	0	0.0293345	-0.000774874	0.0470203	0	0.00256492	0.0446125	0	4.60746	0.0133824	-0.0101302	0.860252	6.08603	-0.0508461	0.953746	-0.0710872	0.119751	0.0729693	-0.022094	0.311206	0.0476171	3.70927	0.00159978	0.147335
4	Miyagi	35	Non-ferrous metal products	0	0	0	0	3.53113	0.188415	0	0	0.0469168	8.53358	0	0.263819	3.44503	0	0.142295	0	0	0	0	0.930385	0.0621681	0	0	2.51154	1.68532	0.0579745	0	0	0.24123	0	0	0	0	0.223297	25.0547	13.9006	24.7279	31.9442	18.3775	16.8782	9.11672	36.0931	29.153	54.4944	0.994131	134.149
4	Miyagi	36	Metal products for construction and architecture	0.0681337	0	0	0	0	0	0	0	0	0.678285	0	0	0	0	0	0	0	0	0	0	0	0	0	0	0	0	0	0	0	0	0	0	0	0	0	11.4051	1.73463	0.420511	0	0.351071	0	0	0	0	0	0.149059
4	Miyagi	37	Other metal products	0.397467	0	0.00640129	0	15.9487	9.42903	0	2.29905	1.97071	17.1318	0.0989138	1.01283	1.98909	0	0.655542	0	0.129153	0	0	13.3455	1.33842	0.0437721	0.221503	1.02458	6.86279	0.450378	0.903612	0	2.32156	0	0	0.449437	0.0197447	0	0.33513	26.3133	60.2954	32.0358	23.3747	11.852	19.5384	10.241	7.50938	1.48115	0.536317	14.6322
4	Miyagi	38	General industrial machinery	0	0	0	0	0	0	0	0	0	0.109879	0	0	0	0	0	0	0	0	0	0	0	0	0	2.14498	0	0.0071391	0.0157925	0	0.13139	0	0	0.0765849	0.107665	0	0.0152285	0.0584214	0.439385	193.079	25.6869	5.46746	7.06689	2.1054	1.99229	0.0331004	0.12752	0.387814
4	Miyagi	39	Special industrial machinery	0	0	0	0	0	0	0	0	0	0	0	0	0	0	0	0	0	0	0	0	0	0	0	0	0	0	0	0	0	0	0	0	0	0	0	0	0	0.949647	390.398	0	0.0535841	0	0.0306985	0.23793	0	0
4	Miyagi	40	Other general machines	0	0	0	0	0	0	0	0	0	1.45658	0	0	0	0	0	0	0	0	0	0.0889011	0	0	0	0.246952	0	0.012852	0	0	0.0719878	0	0	0.0984785	0	0	0.0274147	0.18405	0.551855	34.8054	25.3872	70.2481	2.79803	3.15649	2.19115	0.198627	0.153043	1.91004
4	Miyagi	41	Machinery for office and service industry	0	0	0	0	0	0	0	0	0	0	0	0	0	0	0	0	0	0	0	0	0	0	0	0	0	0	0	0	0	0	0	0	0	0	0	0	0	0	0	0	65.1477	0	0	0	0	0
4	Miyagi	42	Industrial electric equipment	0.491578	0	0	0	0	0	0	0	0	0.0863605	0	0	0	0	0	0	0	0	0	0	0	0	0	0	0	0	0	0	0	0	0	0	0	0	0	0	0	32.4454	39.9712	0.335243	29.2596	141.523	45.5811	7.0112	1.02898	30.935
4	Miyagi	43	Applied electric equipment and electric mesuring instruments	0	0	0	0	0	0	0	0	0	0	0	0	0	0	0	0	0	0	0	0	0	0	0	0	0	0	0	0	0	0	0	0	0	0	0	0	0	2.18155	9.14229	0.60571	1.60814	12.2457	84.0355	0	0	2.09287
4	Miyagi	44	Other electric equipment	0.212015	0	0.00384137	0	0	0	0	0	0	0.158299	0	0	0	0	0	0	0	0	0	0.104346	0	0	0	0	0	0	0	0	0	0	0	0	0	0	0	0	0.323865	1.02501	2.94444	0.614501	2.57927	6.57242	3.91413	23.9643	0.224539	25.73
4	Miyagi	45	Household electric and electric applications	0	0	0	0	0	0	0	0	0	0	0	0	0	0	0	0	0	0	0	0	0	0	0	0	0	0	0	0	0	0	0	0	0	0	0	0	0	0	0	0	0	0	0	0	0.0259946	0
4	Miyagi	46	Communication equipment	0	0	0	0	0	0	0	0	0	0	0	0	0.191697	0	0	0	0	0	0	0	0.0559257	0	0	0	0	0	0	0	0	0	0	0	0	0	0	0	0	1.08577	0.203599	0	0	0.0291114	2.35863	0.0241808	0	40.7965
4	Miyagi	47	Electric computing equipment and accessory equipment	0	0	0	0	0	0	0	0	0	0	0	0	0	0	0	0	0	0	0	0	0	0	0	0	0	0	0	0	0	0	0	0	0	0	0	0	0	0	4.83437	0	0	0	0	0	0	0.93599
4	Miyagi	48	Semiconductor devices and integrated circuits	0	0	0	0	0	0	0	0	0	0	0	0	0	0	0	0	0	0	0	0	0	0	0	0	0	0	0	0	0	0	0	0	0	0	0	0	0.290218	1.05532	6.86019	1.86175	113.672	70.5898	466.727	3.51423	4.22545	606.251
4	Miyagi	49	Other electrical equipment	0	0	0	0	0	0	0	0	0	0	0	0.142007	6.88222	0	0	0	0	0	0	0	0	0	0	0	0	0	0	0	0	0	0	0	0	0	0.106506	0	0.285861	20.4432	42.9473	1.17519	174.239	122.305	1046.02	3.241	5.88628	1366.86
4	Miyagi	50	Passenger motor cars	0	0	0	0	0	0	0	0	0	0	0	0	0	0	0	0	0	0	0	0	0	0	0	0	0	0	0	0	0	0	0	0	0	0	0	0	0	0	0	0	0	0	0	0	0	0
4	Miyagi	51	Other cars	0	0	0	0	0	0	0	0	0	0	0	0	0	0	0	0	0	0	0	0	0	0	0	0	0	0	0	0	0	0	0	0	0	0	0	0	0	0	0	0	0	0	0	0	0	0
4	Miyagi	52	Motor vheicle parts and accessories	0	0	0	0	0	0	0	0	0	0	0	0	0	0	0	0	0	0	0	0	0	0	0	0	0	0	0	0	0	0	0	0	0	0	0	0	0	0	0.0709092	0	0	0	0	0	0	0
4	Miyagi	53	Other transportation equipment	1.62972	0	0	0	0	0	0	0	0	0	0	0	0	0	0	0	0	0	0	0	0	0	0	0	0	0	0	0	0	0	0	0	0	0	0	0	0	0	0	0	0	0	0	0	0	0
4	Miyagi	54	Precision instruments	1.33546	0	0	0	0	0	0.0112257	0.0104152	0.0128157	0	0.0184067	0.036032	0.0388056	0	0	0	0	0	0	0.0525811	0.0226423	0	0	0.199175	0	0	0	0	0	0	0	0	0	0	0.0135121	0.0259185	0.0362664	4.50577	12.3974	0.0688119	3.86939	2.02722	3.37633	0.00978991	0.0150864	4.06433
4	Miyagi	55	Miscellaneous manufacturing products	1.33098	0	0.0160768	0	2.91629	0.455951	0.0466172	30.8238	0.408018	6.33065	0.0509583	0.448891	0.966889	0	0	0	0.0772304	0	0	0.630799	0	0	0.206038	0.306338	0.182069	0.648862	0.232761	0.0669634	1.62779	0	0	0.67188	0.0330592	0	0.299263	0.574035	0.401609	5.14175	1.62025	0.254005	0	0.261037	1.10153	0.0677577	0.0208831	4.43967
4	Miyagi	56	Reuse and recycling	0	0	0	0	0	2.62306	0	0	0	0	0.107354	0	0	0	0.0976541	0	0	0	0	0	0	0	0	2.85946	0.0131134	0.159147	0.201173	0.00868137	0.00909625	0	0.535191	2.36926	0.214295	1.5225	3.54028	0	0	0	0	0	0	0	0	0	0	0
4	Miyagi	57	Building construction and repair of construction	0	0	0	0	0	0	0	0	0	0	0	0	0	0	0	0	0	0	0	0	0	0	0	0	0	0	0	0	0	0	0	0	0	0	0	0	0	0	0	0	0	0	0	0	0	0
4	Miyagi	58	Public construction	0	0	0	0	0	0	0	0	0	0	0	0	0	0	0	0	0	0	0	0	0	0	0	0	0	0	0	0	0	0	0	0	0	0	0	0	0	0	0	0	0	0	0	0	0	0
4	Miyagi	59	Other civil enginnering and construction	0	0	0	0	0	0	0	0	0	0	0	0	0	0	0	0	0	0	0	0	0	0	0	0	0	0	0	0	0	0	0	0	0	0	0	0	0	0	0	0	0	0	0	0	0	0
4	Miyagi	60	Electricity	0.0394215	0	0.00219183	0	1.39547	0.0968962	0.0173592	0.0582625	0.0285896	0.0816354	0.0387291	0.100477	0.965537	0.000376413	0.0441432	0	0.0164067	0.000132603	0	0.296507	0.0254468	0.0277385	0.0176088	0.299396	0.18413	0.020822	0.0944898	0.0013081	0.0364925	0	0.488892	0.0944991	0.0534799	0.0435763	0.024206	0.0801591	0.298028	0.244975	0.252287	0.116875	0.0674058	0.114533	0.0536026	0.0279614	0.0191222	0.201017
4	Miyagi	61	Gas supply and heat supply	2.47306e-05	0	0	0	0.0473814	0.00467489	0.000452146	0.000274845	3.55989e-05	0.000566255	0.000127823	0.00252723	0.000808446	0	0.000237531	0	0.000154979	0	0	0.00416264	0.00150161	0	6.20189e-05	0.00504081	0.00119757	0.00171998	0.000700627	7.3907e-05	0.000175998	0	0.0127766	0.000876377	4.97552e-05	0.000130924	0.000309651	0.00124192	0.00438216	0.00189265	0.00127078	0.000589358	0.000937027	0.00149781	0.000552614	0.000999381	4.19063e-05	0.00411192
4	Miyagi	62	Water supply and waste management services	0.00708667	0	0.000114132	0	0.982909	0.111369	0.0153889	0.00721566	0.0045338	0.019597	0.0127521	0.0393034	0.175035	0	0.0126048	0	0.00838858	0.000231312	0	0.225028	0.067085	0.00292665	0.00263287	0.0495844	0.0256354	0.00588249	0.152435	0.000427847	0.0242079	0	0.096712	0.00286188	0.00457652	0.00604847	0.00497936	0.0259793	0.0481123	0.155189	0.129038	0.0395583	0.0491391	0.042217	0.0289898	0.0079369	0.00622662	0.0635466
4	Miyagi	63	Commerce	127.153	0	0.325708	0	3198.75	148.637	12.8215	207.857	35.3847	213.172	35.1012	422.197	1652.62	0.227132	22.1178	0	9.5017	0.440076	0	503.859	81.2771	2.15971	20.947	257.334	143.223	13.0003	229.065	0.690656	26.0001	0	259.326	22.4721	177.609	5.45679	26.5942	116.099	229.669	417.854	505.62	136.486	318.456	220.493	460.531	98.5126	12.4232	779.783
4	Miyagi	64	Financial and insurance	2.77774	0	0.0163226	0	9.875	1.02382	0.457164	5.37131	0.31192	3.5942	0.382739	6.32876	15.9224	0.00213422	0.277104	0	0.0545314	0.00150369	0	2.31601	0.548918	0.134444	0.0342308	1.96156	1.89054	0.421248	8.27655	0.0259587	0.538157	0	2.33012	0.266039	1.03211	0.495208	0.155372	1.47276	1.7254	5.21264	3.78501	3.96503	1.49831	2.28134	1.77015	0.247657	0.0852912	3.90823
4	Miyagi	65	Real estate agencies and rental services	2.65146	0	0.00576481	0	12.5487	1.11892	0.225665	4.73026	0.104959	4.46089	0.534473	8.63835	14.7061	0	0.40515	0	0.0664638	0	0	2.636	1.60994	0.0394199	0.354629	11.4021	2.927	0.198082	12.1439	0.0216105	0.36984	0	3.10858	0.751678	0.551226	0.18991	0.150904	1.4087	4.27976	7.16762	7.36462	4.42311	1.50693	5.95837	4.7483	1.79308	0.168485	5.42367
4	Miyagi	66	House rent	0	0	0	0	0	0	0	0	0	0	0	0	0	0	0	0	0	0	0	0	0	0	0	0	0	0	0	0	0	0	0	0	0	0	0	0	0	0	0	0	0	0	0	0	0	0
4	Miyagi	67	Transport	141.466	0	3.81159	0	452.624	45.53	3.83922	27.9781	19.1257	40.4162	5.09331	63.7062	468.688	0	7.63756	0	1.59589	0	0	109.132	27.9477	4.06046	1.666	54.1733	19.2051	6.56485	446.529	0.20054	75.1824	0	128.48	4.50717	22.0286	3.19516	7.5339	51.7344	82.0112	111.069	87.1359	50.9185	53.8384	41.4081	95.4071	10.5518	1.59477	203.663
4	Miyagi	68	Communication	10.2498	0	0.0678472	0	11.737	0.721576	0.332934	7.0765	0.0691069	9.39142	0.384615	10.5407	65.0257	0	0.544948	0	0.075214	0	0	11.2942	29.3334	0.910037	0.963161	11.1877	11.4467	0.811248	1.92681	0	0.655983	0	4.14409	1.23015	0.289764	1.24089	1.18401	8.73511	9.24029	32.3265	14.8238	9.70938	9.20208	12.7905	11.9077	1.57053	0.244054	18.8705
4	Miyagi	69	Broadcasting	0	0	0	0	0	0	0	0	0	0	0	0	0	0	0	0	0	0	0	0	0	0	0	0	0	0	0	0	0	0	0	0	0	0	0	0	0	0	0	0	0	0	0	0	0	0
4	Miyagi	70	Information services	0.102415	0	0.000549807	0	0.402299	0.0526263	0.00366677	0.0233704	0.00709819	0.188808	0.00679657	0.183706	0.671524	0	0.00552005	0	0.00269401	0	0	0.14213	0.206602	0.000187979	0.00549607	0.231318	0.0855111	0.0170025	0.0998996	0.000824423	0.0118056	0	0.0873133	0.0154409	0.0400226	0.00944989	0.0142003	0.051164	0.175115	0.373949	0.458657	0.1632	0.195009	0.403227	0.816276	0.146541	0.00214252	0.867467
4	Miyagi	71	﻿Internet based services	0.00173498	0	0	0	0.00803806	0.00150444	0.000205088	0.00323477	0.000390226	0.00831217	0.000224187	0.00680229	0.0298944	0	0.000284045	0	0	0	0	0.00256167	0.0197179	8.06072e-05	0.000181289	0.0145552	0.00213599	0.000617213	0.00443738	0	0.00043215	0	0.00195586	0.000945882	0.000145441	0.000135073	0.000905151	0.00552435	0.00717781	0.014322	0.00853368	0.00419052	0.00519614	0.0119147	0.00699222	0.00125199	9.18732e-05	0.0320261
4	Miyagi	72	Image information production and distribution industry	0.121599	0	0.00774906	0	0.983266	0.0218154	0.0290783	0.44515	0.0165984	0.346464	0.0151707	0.63213	2.8191	0	0.0439344	0	0.00656917	0	0	0.598463	0.130631	0.00155848	0.0210305	0.294443	0.419861	0.0454959	0.897531	0.00113917	0.064455	0	0.221488	0.0205739	0.0365559	0.0078346	0.0127276	0.155636	0.58927	0.403711	0.372688	0.175544	0.387835	0.59117	0.973094	0.138322	0.017763	1.19253
4	Miyagi	73	Public administration	0	0	0	0	0	0	0	0	0	0	0	0	0	0	0	0	0	0	0	0	0	0	0	0	0	0	0	0	0	0	0	0	0	0	0	0	0	0	0	0	0	0	0	0	0	0
4	Miyagi	74	Education and Research	0.243218	0	0.00813545	0	16.6384	1.55123	0.15165	1.04587	0.0519386	3.89001	0.0635459	2.96383	1.12127	0.0267452	2.23569	0	0.669967	0.0282654	0	52.5745	40.4862	0.019868	0.236825	28.1092	15.1253	3.31549	6.55813	0.0740649	0.902342	0	5.6472	0.340967	0.0107544	1.31839	1.30413	2.57544	2.33804	23.4766	43.2008	3.51522	36.2033	43.0974	73.8159	14.6581	1.01675	106.439
4	Miyagi	75	Medical service, health and social security and nursing care	0.418535	0	0.0143681	0	5.6523	1.06966	0.0416625	1.76522	0.0634177	0.855248	0.113855	1.96133	2.37634	0	0.211575	0	0.0276088	0	0	3.94628	2.8151	0.0163749	0.147311	3.0937	2.49501	0.172402	4.22978	0.0119692	0.050165	0	1.07844	0.19215	0.65	0.041159	0.050148	0.609216	1.92922	7.17839	4.73162	4.51178	6.03882	1.66221	1.8564	0.193779	0.037327	7.22879
4	Miyagi	76	Advertising and survery	0.45737	0	0.00127958	0	2.28856	0.918101	0.00477043	0.0565544	0.0105896	0.598027	0.117547	1.28791	0.243237	0.000525826	0.0282633	0	0.00158063	0	0	8.59437	0.752114	0.000937476	0	0.86103	0.479934	0.0143566	0.0621938	0.00228416	0.0277626	0	0.155979	0.0201681	0.0118405	0.00157093	0.00957006	0.0875014	0.119868	0.40111	0.360018	0.312997	0.350881	0.322497	0.593132	0.0949927	0.0242194	1.16584
4	Miyagi	77	Giids rental and leasing services	8.62966	0	0.100714	0	74.3977	3.66959	1.16814	3.94383	1.16072	17.4553	1.0907	23.5036	117.553	0	2.18712	0	0.182774	0	0	13.4931	2.01799	0.369849	5.47845	40.9402	16.0808	2.04462	33.4292	0.121187	2.59819	0	11.7149	2.28223	3.79685	0.448787	2.10909	9.28985	31.6934	109.106	83.8377	46.9853	37.8174	80.1399	62.4558	11.5739	0.91576	148.897
4	Miyagi	78	Other business services	5.50794	0	0.0842489	0	78.4513	3.66939	0.750328	9.04459	1.36126	17.6163	0.824968	30.7675	277.372	0.0115403	2.81953	0	0.219704	0.0162617	0	22.4311	11.5676	0.411497	1.29567	50.0176	27.6542	4.96259	43.0691	0.0451176	2.62107	0	8.1303	3.79254	1.18795	1.79281	1.69428	10.4346	18.6125	53.5366	41.1126	14.3924	27.1122	31.4625	69.6524	8.79577	1.17252	59.6713
4	Miyagi	79	Personal services	8.61091	0	0	0	3.73942	0.131863	0	0.617083	0.0615653	0.567704	0	0.92317	6.92855	0	0.0497926	0	0	0	0	1.26297	0.380699	0	0	1.48838	0.514849	0.050717	1.07704	0	0.0162332	0	0.661226	0.0621792	0.22946	0	0.043274	0.290523	0.813027	1.44302	1.18795	0.550943	0.826142	1.77408	1.12864	0.360562	0	2.32882
4	Miyagi	80	Activities not elsewhere classified	0	0	0	0	0	0	0	0	0	0	0	0	0	0	0	0	0	0	0	0	0	0	0	0	0	0	0	0	0	0	0	0	0	0	0	0	0	0	0	0	0	0	0	0	0	0
5	Akita	1	Agriculture, forestry and fishery	49.0403	0	0	0	1435.37	39.814	3.70461	0.151638	41.7333	0	0.156326	0.0874334	0	0	0.226361	0	0.135384	0	0	2.12651	2.93942	0	1.22802	0	242.92	0	0	0	0.713376	0	0	0	0	0	0.0327878	0	0	0	0	0	0	0	0	0	0	0
5	Akita	2	Metallic ores	0	0	0	0	0	0	0	0	0	0	0	0	0	0	0	0	0	0	0	0	0	0	0	0	0	0	0	0	0	0	0	0	0	0	0	0	0	0	0	0	0	0	0	0	0	0
5	Akita	3	Non-metallic ores	0	0	0.232073	0	0	0	0	0	0	0	0.611339	0	0	0	2.06552	0	0.036157	0	0	0.596322	0.146735	-0.450341	0.241152	0	0.805038	57.882	19.7057	0.564304	9.78884	0	0	0.377465	0	0.035935	0.0218916	0.167966	0.323162	0	0	1.11485	0	0	0	0	0	0
5	Akita	4	Coal mining, crude petroleum and natural gas	0	0	0	0	0	0	0	0	0	0	0.0410411	0.00388743	0	0.00720886	0.00279566	0	0.00361163	0	0	0.0107154	0.000814276	4.06041	0	0	0.00315346	0.0230083	0.171337	0.00208767	0.0280721	0	0.0973506	0.000698223	0	0.00358946	0.000485932	0.000932097	0	0	0	0.00164977	0	0	0	0	0	0
5	Akita	5	Food and Tobacco	3.54937	0	0	0	808.136	22.413	0	0.699609	0.00558994	0	0.0321145	0	0	0	0.00678153	0	0.00486715	0	0	3.60841	0.780212	0	0	0.00965289	0	0	0	0	0.0265307	0	0	0	0	0	0	0	0	0	0	0	0	0	0	0	0	0
5	Akita	6	Beverage	0.387776	0	0	0	1.31286	5.90839	0	0	0	0	0	0	0	0	0	0	0.00433943	0	0	0	0.00440264	0	0	0	0	0	0	0	0	0	0	0	0	0	0	0	0	0	0	0	0	0	0	0	0	0
5	Akita	7	Textile products	0.169238	0	0	0	0	0.00320765	1.52346	22.7258	0	0.375626	0.0272456	0.17404	0.299294	0	0	0	0	0	0	0.0027309	0	0	0	0.103445	1.57803	0.00690887	0	0	0.041068	0	0	0	0	0	0.00842135	0.00403838	0.0226028	0.0136985	0.287693	0	0	0	0	0.00152538	0.0258568	0.0404644
5	Akita	8	Wearing aparel and other textile products	23.5198	0	0.0729037	0	63.5052	1.49532	5.82848	29.1117	1.6204	4.86409	0.519933	11.9228	9.08232	0	0.376433	0	0.120075	0	0	7.35555	1.40097	0	2.80297	1.72652	3.69569	0.971334	4.22202	0	2.18175	0	4.69031	0.470076	1.47772	0.0596688	0.690654	1.60369	5.90259	8.92842	5.23333	7.15786	4.96448	15.5047	8.56308	1.21149	0.365267	22.706
5	Akita	9	Timber and wooden products	3.55276	0	0	0	17.1504	0.746832	0	1.22797	139.882	280.536	33.7627	108.983	1.58373	0	0	0	0	0	0	1.66906	0	0	0	1.80638	0.0662717	2.84374	0.127085	0.350987	1.42507	0	0	1.23258	0	0	2.696	3.29087	7.15381	1.5947	1.86895	0.624076	7.91835	1.65683	1.85582	0.488332	0.0684114	2.11978
5	Akita	10	Furniture and fixtures	0.0259993	0	0	0	2.16817	0.0751488	0.0245867	0.433417	0.0187126	14.4814	0.0268762	0.657645	1.16156	0	0.0340523	0	0.0325861	0	0	0.908509	0.132243	0	0	0.710898	0.202722	0.023123	0.225063	0.00706351	0.133219	0	0.267971	0.0566977	0	0	0.0295943	0.0378444	0.185338	0.240696	0.529576	0.184203	0.202815	0.318373	0.49797	0.0571784	0.0330422	3.06203
5	Akita	11	Pulp, paper, paperboard, building paper	0.0253506	0	0	0	1.40938	0.0293095	0.207768	0.0593127	0.419651	3.17986	37.7099	115.73	112.401	0	0.354161	0	0	0.0446826	0	3.44355	0.0322358	0	0	1.03974	0.291294	0.144294	0	0	0.46185	0	0.130642	0	0.102005	0	0.0577117	0	0.0258163	0.031292	0	0.0979676	0	2.13105	0.0323696	0.0278758	0.0214785	0.924344
5	Akita	12	Paper products	1.90677	0	0	0	63.7074	5.88975	0.101671	0.754642	0.0204831	2.82373	0	2.28438	2.95641	0.011866	0.15738	0	0.0237795	0	0	39.2745	1.79738	0	0	1.07292	0.288084	0.762698	0.447923	0.0670092	0.113419	0	0	0	0.0381713	0	0.00719875	0	0.937085	0.304454	0.0263492	0.268843	0.32772	0.458382	0.472408	0.156471	0.072337	1.63264
5	Akita	13	Publishing, printing	0.00670919	0	0.000162079	0	4.74167	0.0982544	0.00422976	0.210608	0.00482884	0.138777	0.000385304	1.5779	63.4457	0	0.0123673	0	0	0	0	1.59597	0.0293859	0.00055415	0.00124631	0.0138976	0.0226383	0.0445531	0.00938637	0	0.00763946	0	0.0268919	0.0105668	0.00199973	0.000464294	0.00735403	0.0151913	0.168533	0.146309	0.130447	0.0595377	0.451924	0.0582254	0.150395	0.00573806	0.0214744	0.844256
5	Akita	14	Chemical fertilizer	6.39387	0	0	0	0	0.0342239	0	0	0	0	0	0	0	0.444318	1.52495	0	0.241153	0.0260874	0	2.65149	0.771639	0	0	0	0	0	0	0	0.0168528	0	1.7543	0	0	0	0	0	0	0	0	0	0	0	0	0.0162749	0	0
5	Akita	15	Basic inorganic chemical products	0	0	0	0	5.41061	0.162528	0.268828	0.00274086	0	0.0233242	0.0702361	0.189643	0.0204241	0.0468899	4.16103	0	0.478645	0.00825918	0	18.8739	2.85412	0	0	1.03664	3.6421	0.910166	0.147502	0	0.0133389	0	1.43681	0.0153278	0.00628492	0.0058369	0.00711166	0.156875	0.128841	0.0983289	0.0997834	0.132795	0.0574405	0.145776	0.293179	0.126239	0	0.379302
5	Akita	16	Basic organic chemical products	0	0	0	0	0	0	0	0	0	0	0	0	0.00432898	0	0	0	0.0051348	0	0	0.0698996	0.00173653	0	0	0	0.000203791	0	0	0	0	0	0	0	0	0	0	0	0	0.000306489	0	0	0	0	0	0	0	0
5	Akita	17	Organic chemical products	0.0505293	0	0	0	0.474442	0.0841251	0.14951	0.000788155	0.00436412	0.00402423	0.0195005	0.00817999	0.0557945	0	0.0705921	0	0.779387	0.0504686	0	6.32658	1.33175	0	0.00225274	0.882561	1.14464	0.010306	0	0	0.0038357	0	0	0	0	0.000419611	0.00766881	0.000980668	0.00686099	0.0307701	0.000623772	0.00781084	0.111118	0.0151622	0.00344106	0.00185209	0.0114164	0.0122828
5	Akita	18	Synthetic resins	0	0	0	0	0	0	0.00120081	0	0	0.00530928	0.00590684	0.0154173	0.0033208	0	0	0	0	0	0	1.06042	0	0	0	1.50891	0	0	0	0	0.00151816	0	0	0	0	0	0.000867229	0	0	0	0	0.00147215	0.00509422	0.0469001	0	0.00188499	0.00193653	0.0422257
5	Akita	19	Synthetic fibers	0	0	0	0	0	0	0.0473112	0.158284	0	0.0033327	0.000432576	0	0	0	0	0	0	0	0	0	0	0	0.000932813	0.00450745	0.000915885	0	0	0	0	0	0	0	0	0	0	0	0	0	0	0	0	0	0	0	0	0
5	Akita	20	Final chemical products	0.116507	0	0.00415883	0	0.832899	0.0462409	0.0690662	0.0956106	0.170212	0.38431	0.108753	1.78757	30.8822	0	0.31278	0	0.0577556	0	0	15.1773	1.0072	0.0129264	0.101753	0.590016	0.208376	0.0123723	0.0848438	0	0.135632	0	0.0403261	0.0151685	0.00466468	0	0.0171544	0.0404985	0.258545	0.107323	0.0998192	0.0761607	0.794514	0.132367	0.112129	0.0602322	0.00294662	0.315757
5	Akita	21	Medicaments	2.30541	0	0	0	0.133233	0	0	0.00182229	0	0	0	0	0	0	0	0	0	0	0	0.625585	3.74567	0	0	0	0	0	0	0	0	0	0	0	0	0	0	0	0	0	0	0	0	0	0	0	0	0
5	Akita	22	Petroleum refinery products	0.02483	0	2.30215e-05	0	0.0627917	0.000550892	0.00203601	0.000340641	0.000190523	0.00105411	0.000711465	0.00203553	0.0630551	6.62227e-05	0.00522367	0	0.00278691	0	0	0.0140704	0.000504912	0.00519491	0.0199152	0.000723801	0.00186848	0.00508522	0.00241647	0.000230135	0.00247161	0	0.0151423	0.000346361	0	0.000230817	0.000602629	0.00169538	0.00555324	0.00254867	0.000882309	0.00061379	0.000235995	0.00091113	0.000811214	0.00157184	0	0.00115825
5	Akita	23	Coal products	0	0	0	0	0	0	0	0	0	0	8.56753e-05	0	0	0	0.000337714	0	0.000415508	0	0	5.43873e-05	0	0	0	0	0	0	0	0	0.00116392	0	0.0153762	0.00542218	0	0.000688262	0.000251573	8.04264e-05	0	0	0.000204627	7.11757e-05	0	0	0	0	0	8.05868e-05
5	Akita	24	Plastic products	0.598703	0	0	0	12.221	1.4891	0.0222028	0.623878	0.0941478	1.53763	0.111817	5.2126	46.3032	0.00629314	0.136182	0	0.00315286	0	0	6.89354	1.09398	0	0	33.8974	2.37024	0.0912801	0.0237556	0	0.040101	0	0	0	0	0.0031335	0.377967	0.161112	0.312535	0.372616	3.25135	0.41478	2.71922	1.89154	1.30731	1.76203	0.115092	10.6583
5	Akita	25	Rubber products	1.72724	0	0.00373668	0	1.54348	0.0298056	0.0270877	0.41719	0.0185545	0.256642	0.0177661	0.347781	1.88212	0	0.00750325	0	0.0161554	0	0	0.219922	0.0928808	0	0.0287333	0.213604	7.24339	0	0.500424	0	0.205479	0	0.730695	0.00936979	0.0115258	0	0.00652095	0.50033	0.358794	4.2535	3.83484	0.686311	5.03711	2.07043	1.82144	0.392143	0.0873681	4.66862
5	Akita	26	Glass and glass products	0.0199676	0	0	0	5.15203	14.4286	0	0	0	6.57966	0	0	0.0652743	0	0.191783	0	0	0	0	19.0257	2.33595	0	0	2.03499	0.0983313	2.32282	0.0314272	0	0.295571	0	0	0	0	0	0	0.145323	0.244012	0.271121	0.0369743	0	1.37961	0.0793012	2.68985	1.28446	0.0676707	0.698944
5	Akita	27	Cement and cement products	0	0	0	0	0	0	0	0	0	0	0	0	0	0	0	0	0	0	0	0	0	0	0	0	0	0	3.09958	0	0.00188438	0	0	0	0	0	0	0	0	0	0	0	0	0	0	0	0	0
5	Akita	28	Pottery, china and earthenware	0	0	0	0	0.0668411	0	0	0	0	0.0636528	0	0	0	0	0.00186097	0	0	0	0	0.0020979	0	0	0	0.00264892	0	0	0.00335449	0.00579036	0	0	0	0	0	0	0	0	0.00434092	0.00263083	0	0	0	0.0818234	0.00544285	0.00117181	0	0.0746042
5	Akita	29	Other ceramic, stone and clay products	0.0580397	0	0	0	0.220632	0	0	0	0	0.0962994	0.0166659	0	0.0210814	0	0.495517	0	0	0	0	0.0825211	0.0492022	0	0.603767	0.0801503	0.0211718	0.238593	17.0417	0.0385446	2.09276	0	0.249252	0.196886	0	0.0040165	0.0440433	0.140804	0.51225	4.21099	0.626925	0.498433	0.0431194	0.490889	0.197626	0.191464	0.00546384	0.3339
5	Akita	30	Pig iron and crude steel	0	0	0	0	0	0	0	0	0	0	0	0	0	0	0.0012885	0	0	0	0	0	0	0	0	0	0	0	0	0	0	0	-1.72248	0.499603	-0.42851	0	0	-0.0429596	-0.447828	-0.14299	-0.306043	-0.0237615	-0.0172671	-0.0410244	-0.000471064	-0.002434	-0.00250055	-0.0209846
5	Akita	31	steel products	0.00167613	0	0	0	0	0	0	0	0.00603184	0.793428	0	0	0	0	0	0	0	0	0	0	0	0	0	0.0822861	0.0983622	0	0.224236	0	0.00381707	0	17.8889	0.212001	11.6464	0	0.00699559	1.31381	5.51846	1.79586	1.94603	0.595922	0.33715	1.36518	0.211346	0.252503	0.0362128	0.307412
5	Akita	32	Cast and forged steel products	0	0	0	0	0	0	0	0	0	0.0919713	0	0	0	0	0	0	0	0	0	0	0	0	0	0	0	0	0	0	0.00525975	0	0	0	0	0	0.00701063	1.04891	0.809107	9.7046	4.92684	5.16494	1.27662	1.92015	0.383385	0.0660322	0.00782741	0.107795
5	Akita	33	Other iron or steel products	0	0	0	0	0	0	0	0	0	8.75002	0	0	0	0	0.00856533	0	0	0	0	0.0144838	0	0	0	0.012192	0	0	0.162114	0	0.0558488	0	0	0.139049	0	0	0.01861	14.0789	27.2571	10.6859	7.18409	1.33946	2.01691	2.74659	0.0313142	0.668779	0.311672	3.90946
5	Akita	34	Non-ferrous metals	0	0	0	0	0	0	0	0	0	1.90296	0.0329332	0	-23.4677	0	36.3856	0	0.958318	0	0	103.172	0	0	0	1.9798	-0.0522966	3.17343	0	0.173108	3.01092	0	310.96	0.903182	-0.683694	58.0588	410.749	-3.43163	64.3688	-4.79771	8.08208	4.92474	-1.49113	21.0035	3.2137	250.341	0.10797	9.9437
5	Akita	35	Non-ferrous metal products	0	0	0	0	0.165514	0.00883152	0	0	0.00219912	0.399992	0	0.0123659	0.161478	0	0.00666974	0	0	0	0	0.0436096	0.00291399	0	0	0.117723	0.0789953	0.00271742	0	0	0.0113071	0	0	0	0	0.0104666	1.17438	0.651558	1.15906	1.49731	0.861404	0.791124	0.427325	1.69178	1.36648	2.5543	0.0465976	6.28794
5	Akita	36	Metal products for construction and architecture	0.0129212	0	0	0	0	0	0	0	0	0.128633	0	0	0	0	0	0	0	0	0	0	0	0	0	0	0	0	0	0	0	0	0	0	0	0	0	2.16292	0.328963	0.0797477	0	0.0665787	0	0	0	0	0	0.0282683
5	Akita	37	Other metal products	0.141882	0	0.00228503	0	5.69313	3.36583	0	0.82068	0.703474	6.11543	0.0353087	0.361544	0.710035	0	0.234005	0	0.0461032	0	0	4.76389	0.47777	0.0156251	0.0790686	0.365741	2.44978	0.160769	0.322558	0	0.828715	0	0	0.160433	0.00704816	0	0.11963	9.39293	21.5234	11.4356	8.34393	4.23074	6.97451	3.65568	2.68058	0.528717	0.191446	5.22317
5	Akita	38	General industrial machinery	0	0	0	0	0	0	0	0	0	0.0114791	0	0	0	0	0	0	0	0	0	0	0	0	0	0.224086	0	0.000745823	0.00164985	0	0.0137263	0	0	0.00800084	0.0112478	0	0.00159092	0.00610329	0.0459026	20.171	2.68351	0.571186	0.738279	0.219951	0.208135	0.003458	0.013322	0.040515
5	Akita	39	Special industrial machinery	0	0	0	0	0	0	0	0	0	0	0	0	0	0	0	0	0	0	0	0	0	0	0	0	0	0	0	0	0	0	0	0	0	0	0	0	0	0.721296	296.523	0	0.0406993	0	0.0233168	0.180718	0	0
5	Akita	40	Other general machines	0	0	0	0	0	0	0	0	0	0.417296	0	0	0	0	0	0	0	0	0	0.0254694	0	0	0	0.0707496	0	0.00368197	0	0	0.0206239	0	0	0.0282132	0	0	0.00785405	0.0527287	0.158101	9.97143	7.27319	20.1254	0.80161	0.904307	0.627744	0.0569048	0.0438455	0.547208
5	Akita	41	Machinery for office and service industry	0	0	0	0	0	0	0	0	0	0	0	0	0	0	0	0	0	0	0	0	0	0	0	0	0	0	0	0	0	0	0	0	0	0	0	0	0	0	0	0	2.79899	0	0	0	0	0
5	Akita	42	Industrial electric equipment	0.0656759	0	0	0	0	0	0	0	0	0.0115379	0	0	0	0	0	0	0	0	0	0	0	0	0	0	0	0	0	0	0	0	0	0	0	0	0	0	0	4.33478	5.34024	0.0447892	3.90915	18.9077	6.08973	0.936711	0.137474	4.13298
5	Akita	43	Applied electric equipment and electric mesuring instruments	0	0	0	0	0	0	0	0	0	0	0	0	0	0	0	0	0	0	0	0	0	0	0	0	0	0	0	0	0	0	0	0	0	0	0	0	0	1.36855	5.73523	0.37998	1.00883	7.68207	52.718	0	0	1.31292
5	Akita	44	Other electric equipment	0.07562	0	0.00137011	0	0	0	0	0	0	0.0564609	0	0	0	0	0	0	0	0	0	0.0372173	0	0	0	0	0	0	0	0	0	0	0	0	0	0	0	0	0.115514	0.365594	1.0502	0.219176	0.919953	2.3442	1.39606	8.5474	0.080087	9.17717
5	Akita	45	Household electric and electric applications	0	0	0	0	0	0	0	0	0	0	0	0	0	0	0	0	0	0	0	0	0	0	0	0	0	0	0	0	0	0	0	0	0	0	0	0	0	0	0	0	0	0	0	0	0.133855	0
5	Akita	46	Communication equipment	0	0	0	0	0	0	0	0	0	0	0	0	0.0260806	0	0	0	0	0	0	0	0.00760874	0	0	0	0	0	0	0	0	0	0	0	0	0	0	0	0	0.147719	0.0276998	0	0	0.00396064	0.320894	0.00328982	0	5.55041
5	Akita	47	Electric computing equipment and accessory equipment	0	0	0	0	0	0	0	0	0	0	0	0	0	0	0	0	0	0	0	0	0	0	0	0	0	0	0	0	0	0	0	0	0	0	0	0	0	0	0.370903	0	0	0	0	0	0	0.0718111
5	Akita	48	Semiconductor devices and integrated circuits	0	0	0	0	0	0	0	0	0	0	0	0	0	0	0	0	0	0	0	0	0	0	0	0	0	0	0	0	0	0	0	0	0	0	0	0	0.466699	1.69707	11.0319	2.99389	182.796	113.515	750.543	5.65123	6.79494	974.911
5	Akita	49	Other electrical equipment	0	0	0	0	0	0	0	0	0	0	0	0.153901	7.45862	0	0	0	0	0	0	0	0	0	0	0	0	0	0	0	0	0	0	0	0	0	0.115426	0	0.309803	22.1553	46.5442	1.27361	188.832	132.548	1133.63	3.51244	6.37927	1481.34
5	Akita	50	Passenger motor cars	0	0	0	0	0	0	0	0	0	0	0	0	0	0	0	0	0	0	0	0	0	0	0	0	0	0	0	0	0	0	0	0	0	0	0	0	0	0	0	0	0	0	0	0	0	0
5	Akita	51	Other cars	0	0	0	0	0	0	0	0	0	0	0	0	0	0	0	0	0	0	0	0	0	0	0	0	0	0	0	0	0	0	0	0	0	0	0	0	0	0	0	0	0	0	0	0	0	0
5	Akita	52	Motor vheicle parts and accessories	0	0	0	0	0	0	0	0	0	0	0	0	0	0	0	0	0	0	0	0	0	0	0	0	0	0	0	0	0	0	0	0	0	0	0	0	0	0	0.0191435	0	0	0	0	0	0	0
5	Akita	53	Other transportation equipment	0.0897937	0	0	0	0	0	0	0	0	0	0	0	0	0	0	0	0	0	0	0	0	0	0	0	0	0	0	0	0	0	0	0	0	0	0	0	0	0	0	0	0	0	0	0	0	0
5	Akita	54	Precision instruments	2.63959	0	0	0	0	0	0.0221882	0.0205861	0.0253307	0	0.0363815	0.0712188	0.0767009	0	0	0	0	0	0	0.103929	0.0447534	0	0	0.393677	0	0	0	0	0	0	0	0	0	0	0.0267073	0.0512289	0.071682	8.90583	24.504	0.13601	7.64802	4.00688	6.67347	0.0193502	0.0298188	8.03332
5	Akita	55	Miscellaneous manufacturing products	0.317453	0	0.00383449	0	0.695567	0.108749	0.0111187	7.3518	0.0973165	1.50993	0.0121541	0.107065	0.230613	0	0	0	0.0184203	0	0	0.150452	0	0	0.0491422	0.0730648	0.0434254	0.15476	0.0555159	0.0159715	0.388246	0	0	0.16025	0.00788496	0	0.0713774	0.136913	0.095788	1.22636	0.386446	0.0605828	0	0.06226	0.262727	0.0161609	0.00498083	1.05891
5	Akita	56	Reuse and recycling	0	0	0	0	0	1.29774	0	0	0	0	0.0531127	0	0	0	0.0483137	0	0	0	0	0	0	0	0	1.4147	0.00648776	0.078737	0.0995289	0.00429505	0.00450031	0	0.264782	1.17217	0.106021	0.753245	1.75153	0	0	0	0	0	0	0	0	0	0	0
5	Akita	57	Building construction and repair of construction	0	0	0	0	0	0	0	0	0	0	0	0	0	0	0	0	0	0	0	0	0	0	0	0	0	0	0	0	0	0	0	0	0	0	0	0	0	0	0	0	0	0	0	0	0	0
5	Akita	58	Public construction	0	0	0	0	0	0	0	0	0	0	0	0	0	0	0	0	0	0	0	0	0	0	0	0	0	0	0	0	0	0	0	0	0	0	0	0	0	0	0	0	0	0	0	0	0	0
5	Akita	59	Other civil enginnering and construction	0	0	0	0	0	0	0	0	0	0	0	0	0	0	0	0	0	0	0	0	0	0	0	0	0	0	0	0	0	0	0	0	0	0	0	0	0	0	0	0	0	0	0	0	0	0
5	Akita	60	Electricity	12.209	0	0.678818	0	432.183	30.0092	5.37621	18.0441	8.85432	25.2828	11.9946	31.1181	299.031	0.116577	13.6713	0	5.08122	0.0410676	0	91.8294	7.88099	8.59074	5.4535	92.724	57.0258	6.44867	29.2639	0.405123	11.3019	0	151.412	29.2667	16.563	13.4957	7.49669	24.8256	92.3004	75.8698	78.1342	36.1967	20.8758	35.4715	16.6009	8.65975	5.92223	62.2558
5	Akita	61	Gas supply and heat supply	0	0	0	0	0	0	0	0	0	0	0	0	0	0	0	0	0	0	0	0	0	0	0	0	0	0	0	0	0	0	0	0	0	0	0	0	0	0	0	0	0	0	0	0	0	0
5	Akita	62	Water supply and waste management services	0	0	0	0	0	0	0	0	0	0	0	0	0	0	0	0	0	0	0	0	0	0	0	0	0	0	0	0	0	0	0	0	0	0	0	0	0	0	0	0	0	0	0	0	0	0
5	Akita	63	Commerce	26.7713	0	0.0685756	0	673.475	31.2946	2.69948	43.7629	7.45001	44.882	7.39033	88.8906	347.949	0.047821	4.65675	0	2.00052	0.092655	0	106.084	17.1123	0.454712	4.41026	54.1799	30.1547	2.73712	48.228	0.145413	5.47415	0	54.5993	4.73135	37.3943	1.14889	5.59923	24.4437	48.3552	87.9763	106.455	28.7363	67.0488	46.4234	96.9616	20.7412	2.61562	164.178
5	Akita	64	Financial and insurance	0.224593	0	0.00131976	0	0.798441	0.0827808	0.0369639	0.434296	0.0252202	0.290608	0.0309462	0.511711	1.2874	0.000172562	0.0224052	0	0.00440912	0.00012158	0	0.18726	0.0443827	0.0108705	0.00276772	0.158601	0.152859	0.0340599	0.669199	0.00209889	0.0435126	0	0.188401	0.0215106	0.0834511	0.04004	0.0125626	0.119079	0.139507	0.421467	0.306036	0.320591	0.121146	0.184458	0.143125	0.0200242	0.0068962	0.315999
5	Akita	65	Real estate agencies and rental services	0	0	0	0	0	0	0	0	0	0	0	0	0	0	0	0	0	0	0	0	0	0	0	0	0	0	0	0	0	0	0	0	0	0	0	0	0	0	0	0	0	0	0	0	0	0
5	Akita	66	House rent	0	0	0	0	0	0	0	0	0	0	0	0	0	0	0	0	0	0	0	0	0	0	0	0	0	0	0	0	0	0	0	0	0	0	0	0	0	0	0	0	0	0	0	0	0	0
5	Akita	67	Transport	20.2861	0	0.546581	0	64.9061	6.52898	0.550543	4.01204	2.74262	5.79567	0.730378	9.13544	67.2096	0	1.09522	0	0.228849	0	0	15.6495	4.00768	0.582268	0.238904	7.76842	2.75401	0.941396	64.0321	0.0287574	10.7811	0	18.4239	0.646327	3.15889	0.458185	1.08036	7.41869	11.7604	15.9272	12.4952	7.30169	7.72039	5.9379	13.6813	1.51312	0.22869	29.2052
5	Akita	68	Communication	0.970063	0	0.00642119	0	1.11081	0.0682913	0.0315095	0.669734	0.00654041	0.888822	0.0364007	0.997589	6.15416	0	0.0515749	0	0.00711839	0	0	1.0689	2.77617	0.0861276	0.0911554	1.05883	1.08334	0.0767781	0.182357	0	0.0620835	0	0.392205	0.116424	0.0274238	0.11744	0.112057	0.826708	0.874519	3.05944	1.40295	0.918914	0.870903	1.21052	1.12697	0.148638	0.0230977	1.78594
5	Akita	69	Broadcasting	0	0	0	0	0	0	0	0	0	0	0	0	0	0	0	0	0	0	0	0	0	0	0	0	0	0	0	0	0	0	0	0	0	0	0	0	0	0	0	0	0	0	0	0	0	0
5	Akita	70	Information services	0.0139392	0	7.48312e-05	0	0.0547547	0.00716267	0.000499065	0.00318082	0.000966095	0.0256977	0.000925043	0.0250033	0.0913974	0	0.000751304	0	0.000366667	0	0	0.0193445	0.0281194	2.55848e-05	0.00074804	0.0314835	0.0116384	0.00231412	0.0135968	0.000112208	0.00160679	0	0.0118837	0.00210157	0.00544726	0.00128617	0.00193272	0.00696366	0.023834	0.0508962	0.0624254	0.0222123	0.0265416	0.054881	0.111099	0.019945	0.000291607	0.118066
5	Akita	71	﻿Internet based services	0.000128752	0	0	0	0.000596502	0.000111644	1.52195e-05	0.000240051	2.89585e-05	0.000616843	1.66368e-05	0.000504796	0.00221845	0	2.10789e-05	0	0	0	0	0.000190101	0.00146326	5.98183e-06	1.34534e-05	0.00108014	0.000158511	4.58032e-05	0.000329297	0	3.20697e-05	0	0.000145144	7.01936e-05	1.07931e-05	1.00237e-05	6.71709e-05	0.00040996	0.000532663	0.00106283	0.000633282	0.000310977	0.000385604	0.000884188	0.00051889	9.29101e-05	6.81788e-06	0.00237665
5	Akita	72	Image information production and distribution industry	0.000497771	0	3.17212e-05	0	0.00402505	8.93025e-05	0.000119034	0.00182225	6.79464e-05	0.00141827	6.2102e-05	0.00258766	0.0115402	0	0.000179848	0	2.68913e-05	0	0	0.00244984	0.000534746	6.37972e-06	8.60897e-05	0.00120532	0.00171872	0.00018624	0.00367409	4.66326e-06	0.00026385	0	0.000906673	8.42203e-05	0.000149643	3.20714e-05	5.2101e-05	0.000637105	0.00241221	0.00165261	0.00152562	0.000718601	0.00158763	0.00241999	0.00398341	0.000566229	7.27138e-05	0.0048817
5	Akita	73	Public administration	0	0	0	0	0	0	0	0	0	0	0	0	0	0	0	0	0	0	0	0	0	0	0	0	0	0	0	0	0	0	0	0	0	0	0	0	0	0	0	0	0	0	0	0	0	0
5	Akita	74	Education and Research	0.00643243	0	0.00021516	0	0.440039	0.0410258	0.00401072	0.0276605	0.00137363	0.10288	0.00168061	0.0783852	0.0296545	0.000707338	0.0591279	0	0.0177188	0.000747542	0	1.39045	1.07075	0.000525453	0.00626338	0.743411	0.400021	0.0876854	0.173444	0.00195881	0.0238644	0	0.149353	0.00901764	0.000284425	0.0348678	0.0344905	0.0681133	0.0618347	0.620891	1.14254	0.0929678	0.957476	1.13981	1.95223	0.387665	0.0268903	2.81502
5	Akita	75	Medical service, health and social security and nursing care	0.000695263	0	2.3868e-05	0	0.0093895	0.00177691	6.92091e-05	0.00293235	0.000105348	0.00142073	0.000189135	0.00325813	0.00394754	0	0.000351464	0	4.58633e-05	0	0	0.0065555	0.00467641	2.72017e-05	0.000244711	0.00513921	0.00414467	0.000286391	0.00702644	1.98831e-05	8.33332e-05	0	0.00179149	0.000319197	0.00107977	6.83726e-05	8.33051e-05	0.00101202	0.00320479	0.0119246	0.00786009	0.0074949	0.0100316	0.00276123	0.00308382	0.000321903	6.2007e-05	0.0120084
5	Akita	76	Advertising and survery	0	0	0	0	0	0	0	0	0	0	0	0	0	0	0	0	0	0	0	0	0	0	0	0	0	0	0	0	0	0	0	0	0	0	0	0	0	0	0	0	0	0	0	0	0	0
5	Akita	77	Giids rental and leasing services	0.00101746	0	1.18745e-05	0	0.0087717	0.000432655	0.000137727	0.000464989	0.000136852	0.00205803	0.000128597	0.00277114	0.0138598	0	0.000257867	0	2.15496e-05	0	0	0.00159087	0.000237926	4.36062e-05	0.000645925	0.00482696	0.00189597	0.000241066	0.0039414	1.42884e-05	0.000306334	0	0.00138122	0.000269081	0.000447659	5.29133e-05	0.000248668	0.0010953	0.00373674	0.0128639	0.0098847	0.0055397	0.00445877	0.00944872	0.00736372	0.0013646	0.000107971	0.0175553
5	Akita	78	Other business services	0	0	0	0	0	0	0	0	0	0	0	0	0	0	0	0	0	0	0	0	0	0	0	0	0	0	0	0	0	0	0	0	0	0	0	0	0	0	0	0	0	0	0	0	0	0
5	Akita	79	Personal services	4.53358	0	0	0	1.96878	0.0694247	0	0.324889	0.0324137	0.298892	0	0.486042	3.64783	0	0.0262154	0	0	0	0	0.664945	0.200435	0	0	0.783621	0.271064	0.0267021	0.567056	0	0.00854667	0	0.348131	0.0327369	0.120809	0	0.0227834	0.152958	0.428053	0.759738	0.625447	0.290067	0.434957	0.934039	0.594218	0.189833	0	1.22611
5	Akita	80	Activities not elsewhere classified	0	0	0	0	0	0	0	0	0	0	0	0	0	0	0	0	0	0	0	0	0	0	0	0	0	0	0	0	0	0	0	0	0	0	0	0	0	0	0	0	0	0	0	0	0	0
6	Yamagata	1	Agriculture, forestry and fishery	57.6569	0	0	0	1687.57	46.8095	4.35553	0.178282	49.066	0	0.183793	0.102796	0	0	0.266134	0	0.159172	0	0	2.50014	3.45589	0	1.44379	0	285.602	0	0	0	0.838718	0	0	0	0	0	0.0385487	0	0	0	0	0	0	0	0	0	0	0
6	Yamagata	2	Metallic ores	0	0	0	0	0	0	0	0	0	0	0	0	0	0	0	0	0	0	0	0	0	0	0	0	0	0	0	0	0	0	0	0	0	0	0	0	0	0	0	0	0	0	0	0	0	0
6	Yamagata	3	Non-metallic ores	0	0	0.0661121	0	0	0	0	0	0	0	0.174156	0	0	0	0.588418	0	0.0103003	0	0	0.169878	0.0418013	-0.128292	0.0686986	0	0.229337	16.4892	5.6137	0.160757	2.78861	0	0	0.107531	0	0.010237	0.0062364	0.0478497	0.0920613	0	0	0.317595	0	0	0	0	0	0
6	Yamagata	4	Coal mining, crude petroleum and natural gas	0	0	0	0	0	0	0	0	0	0	0	0	0	0	0	0	0	0	0	0	0	0	0	0	0	0	0	0	0	0	0	0	0	0	0	0	0	0	0	0	0	0	0	0	0	0
6	Yamagata	5	Food and Tobacco	10.5505	0	0	0	2402.18	66.6224	0	2.07958	0.0166161	0	0.09546	0	0	0	0.020158	0	0.0144676	0	0	10.726	2.31917	0	0	0.0286931	0	0	0	0	0.0788623	0	0	0	0	0	0	0	0	0	0	0	0	0	0	0	0	0
6	Yamagata	6	Beverage	0.554153	0	0	0	1.87615	8.44341	0	0	0	0	0	0	0	0	0	0	0.00620128	0	0	0	0.00629161	0	0	0	0	0	0	0	0	0	0	0	0	0	0	0	0	0	0	0	0	0	0	0	0	0
6	Yamagata	7	Textile products	1.09723	0	0	0	0	0.0207964	9.87718	147.34	0	2.43533	0.176644	1.12837	1.94044	0	0	0	0	0	0	0.0177055	0	0	0	0.670675	10.231	0.0447928	0	0	0.266259	0	0	0	0	0	0.0545988	0.0261824	0.146543	0.0888125	1.86522	0	0	0	0	0.00988959	0.16764	0.262346
6	Yamagata	8	Wearing aparel and other textile products	32.3399	0	0.100243	0	87.3201	2.05608	8.0142	40.0288	2.22806	6.68816	0.714911	16.3939	12.4883	0	0.517598	0	0.165104	0	0	10.1139	1.92635	0	3.85411	2.37398	5.08159	1.33559	5.8053	0	2.99992	0	6.4492	0.646357	2.03188	0.082045	0.949654	2.20508	8.1161	12.2766	7.19586	9.84211	6.8262	21.3191	11.7743	1.66581	0.502244	31.2209
6	Yamagata	9	Timber and wooden products	0.669633	0	0	0	3.23255	0.140765	0	0.23145	26.3653	52.8761	6.36369	20.5414	0.298505	0	0	0	0	0	0	0.314588	0	0	0	0.34047	0.0124911	0.535995	0.0239532	0.066155	0.268602	0	0	0.232319	0	0	0.50815	0.620272	1.34837	0.300573	0.352264	0.117627	1.49247	0.312283	0.349789	0.0920421	0.0128944	0.399542
6	Yamagata	10	Furniture and fixtures	0.0728005	0	0	0	6.07107	0.210424	0.0688449	1.21361	0.0523971	40.5494	0.0752559	1.84147	3.25248	0	0.0953496	0	0.091244	0	0	2.54391	0.370293	0	0	1.99058	0.567641	0.0647465	0.630199	0.0197785	0.373027	0	0.750344	0.158759	0	0	0.0828668	0.105968	0.518965	0.673971	1.48286	0.515787	0.5679	0.891475	1.39436	0.160105	0.0925212	8.57398
6	Yamagata	11	Pulp, paper, paperboard, building paper	0.00337081	0	0	0	0.187402	0.00389721	0.0276264	0.00788667	0.0558	0.422819	5.01419	15.3884	14.9457	0	0.047092	0	0	0.00594134	0	0.45788	0.00428632	0	0	0.138252	0.0387327	0.0191865	0	0	0.0614111	0	0.0173712	0	0.0135634	0	0.00767379	0	0.00343273	0.00416083	0	0.0130265	0	0.283361	0.00430411	0.00370658	0.00285594	0.122908
6	Yamagata	12	Paper products	1.4607	0	0	0	48.8037	4.5119	0.0778861	0.578101	0.0156913	2.16315	0	1.74997	2.26478	0.00909008	0.120562	0	0.0182165	0	0	30.0866	1.3769	0	0	0.821918	0.22069	0.584272	0.343136	0.051333	0.0868854	0	0	0	0.0292415	0	0.00551467	0	0.717863	0.23323	0.0201851	0.20595	0.251053	0.351148	0.361892	0.119866	0.0554144	1.2507
6	Yamagata	13	Publishing, printing	0.0736995	0	0.00178042	0	52.0866	1.07931	0.0464634	2.3135	0.0530441	1.52445	0.00423251	17.333	696.942	0	0.135853	0	0	0	0	17.5316	0.322801	0.00608727	0.0136906	0.152664	0.248679	0.48941	0.103108	0	0.0839184	0	0.295404	0.116075	0.0219667	0.0051002	0.080783	0.166875	1.85131	1.60718	1.43294	0.654014	4.96432	0.639598	1.65207	0.0630318	0.235894	9.27404
6	Yamagata	14	Chemical fertilizer	0.225848	0	0	0	0	0.00120888	0	0	0	0	0	0	0	0.0156945	0.0538652	0	0.00851817	0.000921475	0	0.0936577	0.0272563	0	0	0	0	0	0	0	0.000595286	0	0.0619665	0	0	0	0	0	0	0	0	0	0	0	0	0.000574874	0	0
6	Yamagata	15	Basic inorganic chemical products	0	0	0	0	8.70191	0.261394	0.432357	0.00440813	0	0.0375124	0.112961	0.305003	0.0328481	0.0754133	6.6922	0	0.769808	0.0132833	0	30.3549	4.5903	0	0	1.66724	5.85761	1.46383	0.237227	0	0.021453	0	2.31083	0.0246518	0.0101081	0.00938751	0.0114377	0.252303	0.207216	0.158143	0.160482	0.213575	0.0923818	0.234453	0.471521	0.20303	0	0.610033
6	Yamagata	16	Basic organic chemical products	0	0	0	0	0	0	0	0	0	0	0	0	5.23741e-05	0	0	0	6.21234e-05	0	0	0.00084568	2.10094e-05	0	0	0	2.46556e-06	0	0	0	0	0	0	0	0	0	0	0	0	3.70806e-06	0	0	0	0	0	0	0	0
6	Yamagata	17	Organic chemical products	0.110951	0	0	0	1.04177	0.184719	0.32829	0.00173061	0.00958261	0.00883629	0.0428186	0.0179614	0.122512	0	0.155004	0	1.71136	0.110817	0	13.8917	2.92422	0	0.0049465	1.9379	2.51336	0.0226297	0	0	0.00842232	0	0	0	0	0.00092137	0.0168389	0.00215332	0.0150652	0.0675641	0.00136966	0.0171508	0.243989	0.0332928	0.00755577	0.00406676	0.0250677	0.0269702
6	Yamagata	18	Synthetic resins	0	0	0	0	0	0	0.000412254	0	0	0.00182275	0.0020279	0.00529295	0.00114008	0	0	0	0	0	0	0.364055	0	0	0	0.518027	0	0	0	0	0.000521206	0	0	0	0	0	0.000297731	0	0	0	0	0.000505409	0.00174891	0.0161014	0	0.000647143	0.000664837	0.0144966
6	Yamagata	19	Synthetic fibers	0	0	0	0	0	0	0	0	0	0	0	0	0	0	0	0	0	0	0	0	0	0	0	0	0	0	0	0	0	0	0	0	0	0	0	0	0	0	0	0	0	0	0	0	0	0
6	Yamagata	20	Final chemical products	0.882621	0	0.0315059	0	6.30977	0.350306	0.523222	0.724314	1.28947	2.9114	0.823874	13.542	233.953	0	2.36952	0	0.437537	0	0	114.978	7.63024	0.0979263	0.770844	4.46976	1.57858	0.0937284	0.642749	0	1.0275	0	0.305497	0.114911	0.035338	0	0.129956	0.306803	1.95865	0.813046	0.756197	0.576968	6.01897	1.00277	0.849456	0.456299	0.0223226	2.39207
6	Yamagata	21	Medicaments	15.7219	0	0	0	0.908593	0	0	0.0124272	0	0	0	0	0	0	0	0	0	0	0	4.26621	25.5438	0	0	0	0	0	0	0	0	0	0	0	0	0	0	0	0	0	0	0	0	0	0	0	0	0
6	Yamagata	22	Petroleum refinery products	0.0387206	0	3.59004e-05	0	0.0979191	0.000859077	0.00317501	0.000531205	0.000297106	0.0016438	0.00110948	0.00317426	0.0983298	0.00010327	0.00814594	0	0.00434599	0	0	0.0219418	0.000787374	0.00810109	0.0310564	0.00112872	0.00291376	0.00793003	0.00376832	0.000358879	0.0038543	0	0.0236134	0.000540125	0	0.000359942	0.000939757	0.00264382	0.00865988	0.00397447	0.0013759	0.000957161	0.000368018	0.00142084	0.00126503	0.00245117	0	0.0018062
6	Yamagata	23	Coal products	0	0	0	0	0	0	0	0	0	0	0.00019308	0	0	0	0.000761082	0	0.0009364	0	0	0.000122569	0	0	0	0	0	0	0	0	0.00262304	0	0.0346521	0.0122196	0	0.00155109	0.000566952	0.000181251	0	0	0.000461152	0.000160403	0	0	0	0	0	0.000181613
6	Yamagata	24	Plastic products	1.3249	0	0	0	27.0445	3.2953	0.0491337	1.38061	0.208344	3.4027	0.247445	11.5352	102.466	0.0139264	0.301363	0	0.0069771	0	0	15.255	2.42093	0	0	75.013	5.2452	0.201998	0.0525698	0	0.0887413	0	0	0	0	0.00693426	0.836421	0.356531	0.691624	0.824578	7.19506	0.917884	6.01749	4.18587	2.893	3.89928	0.254691	23.5861
6	Yamagata	25	Rubber products	0.00496405	0	1.07391e-05	0	0.00443593	8.56606e-05	7.78495e-05	0.001199	5.33253e-05	0.000737583	5.10594e-05	0.000999516	0.00540918	0	2.15642e-05	0	4.64302e-05	0	0	0.000632051	0.000266937	0	8.25788e-05	0.000613892	0.0208174	0	0.00143821	0	0.000590543	0	0.0021	2.69286e-05	3.31248e-05	0	1.87411e-05	0.00143794	0.00103117	0.0122245	0.0110212	0.00197244	0.0144765	0.00595037	0.00523477	0.00112701	0.000251094	0.0134175
6	Yamagata	26	Glass and glass products	0.109798	0	0	0	28.3301	79.3405	0	0	0	36.1803	0	0	0.358932	0	1.05458	0	0	0	0	104.619	12.845	0	0	11.19	0.540706	12.7727	0.172812	0	1.62529	0	0	0	0	0	0	0.799107	1.34178	1.49085	0.203315	0	7.58622	0.436063	14.791	7.06302	0.372109	3.84336
6	Yamagata	27	Cement and cement products	0	0	0	0	0	0	0	0	0	0	0	0	0	0	0	0	0	0	0	0	0	0	0	0	0	0	3.10709	0	0.00188895	0	0	0	0	0	0	0	0	0	0	0	0	0	0	0	0	0
6	Yamagata	28	Pottery, china and earthenware	0	0	0	0	0.0178895	0	0	0	0	0.0170362	0	0	0	0	0.000498074	0	0	0	0	0.000561487	0	0	0	0.000708962	0	0	0.000897802	0.00154974	0	0	0	0	0	0	0	0	0.00116181	0.000704119	0	0	0	0.0218994	0.00145673	0.000313625	0	0.0199672
6	Yamagata	29	Other ceramic, stone and clay products	0.245628	0	0	0	0.933729	0	0	0	0	0.407546	0.0705312	0	0.0892179	0	2.09706	0	0	0	0	0.349235	0.208227	0	2.55518	0.339201	0.0896005	1.00974	72.1217	0.163123	8.85672	0	1.05485	0.833233	0	0.0169981	0.186394	0.59589	2.16788	17.8212	2.65319	2.1094	0.182484	2.07748	0.836366	0.810287	0.0231233	1.41309
6	Yamagata	30	Pig iron and crude steel	0	0	0	0	0	0	0	0	0	0	0	0	0	0	0	0	0	0	0	0	0	0	0	0	0	0	0	0	0	0	0	0	0	0	0	0	0	0	0	0	0	0	0	0	0	0
6	Yamagata	31	steel products	3.46837e-05	0	0	0	0	0	0	0	0.000124815	0.0164182	0	0	0	0	0	0	0	0	0	0	0	0	0	0.00170273	0.00203538	0	0.00464007	0	7.89856e-05	0	0.37017	0.00438689	0.240996	0	0.000144758	0.0271863	0.114192	0.0371613	0.0402686	0.0123313	0.00697656	0.0282494	0.00437333	0.00522499	0.000749343	0.00636119
6	Yamagata	32	Cast and forged steel products	0	0	0	0	0	0	0	0	0	0.104231	0	0	0	0	0	0	0	0	0	0	0	0	0	0	0	0	0	0	0.00596085	0	0	0	0	0	0.00794512	1.18872	0.916957	10.9982	5.58357	5.8534	1.44679	2.1761	0.434489	0.0748339	0.00887076	0.122163
6	Yamagata	33	Other iron or steel products	0	0	0	0	0	0	0	0	0	10.3068	0	0	0	0	0.0100892	0	0	0	0	0.0170607	0	0	0	0.0143611	0	0	0.190957	0	0.0657852	0	0	0.163788	0	0	0.021921	16.5837	32.1066	12.5871	8.46226	1.57777	2.37575	3.23526	0.0368855	0.787766	0.367124	4.60502
6	Yamagata	34	Non-ferrous metals	0	0	0	0	0	0	0	0	0	0.604086	0.0104545	0	-7.44972	0	11.5504	0	0.304214	0	0	32.7516	0	0	0	0.628478	-0.0166013	1.00739	0	0.0549524	0.955803	0	98.7128	0.286711	-0.217036	18.4305	130.39	-1.08935	20.4336	-1.52301	2.56562	1.56334	-0.473354	6.66745	1.02017	79.4695	0.0342747	3.15658
6	Yamagata	35	Non-ferrous metal products	0	0	0	0	1.75534	0.0936618	0	0	0.0233225	4.24207	0	0.131145	1.71254	0	0.0707352	0	0	0	0	0.462498	0.030904	0	0	1.24849	0.837777	0.0288194	0	0	0.119916	0	0	0	0	0.111002	12.4548	6.91003	12.2923	15.8796	9.13553	8.39019	4.53195	17.942	14.4921	27.0894	0.494186	66.6861
6	Yamagata	36	Metal products for construction and architecture	0.0111067	0	0	0	0	0	0	0	0	0.110569	0	0	0	0	0	0	0	0	0	0	0	0	0	0	0	0	0	0	0	0	0	0	0	0	0	1.85918	0.282767	0.0685487	0	0.0572291	0	0	0	0	0	0.0242985
6	Yamagata	37	Other metal products	0.30231	0	0.00486876	0	12.1305	7.17164	0	1.74864	1.49891	13.0303	0.075233	0.770349	1.51289	0	0.4986	0	0.0982328	0	0	10.1505	1.01799	0.0332927	0.168473	0.77929	5.21978	0.342554	0.68728	0	1.76576	0	0	0.341838	0.0150177	0	0.254897	20.0137	45.8602	24.3661	17.7786	9.01451	14.8607	7.78923	5.71157	1.12655	0.407918	11.1291
6	Yamagata	38	General industrial machinery	0	0	0	0	0	0	0	0	0	0.0802292	0	0	0	0	0	0	0	0	0	0	0	0	0	1.56618	0	0.00521268	0.0115311	0	0.0959357	0	0	0.0559192	0.0786127	0	0.0111192	0.0426569	0.320821	140.979	18.7555	3.99212	5.15995	1.53728	1.45469	0.0241685	0.09311	0.283166
6	Yamagata	39	Special industrial machinery	0	0	0	0	0	0	0	0	0	0	0	0	0	0	0	0	0	0	0	0	0	0	0	0	0	0	0	0	0	0	0	0	0	0	0	0	0	1.8951	779.072	0	0.106932	0	0.0612614	0.474809	0	0
6	Yamagata	40	Other general machines	0	0	0	0	0	0	0	0	0	1.06405	0	0	0	0	0	0	0	0	0	0.0649437	0	0	0	0.180403	0	0.00938857	0	0	0.0525882	0	0	0.0719401	0	0	0.0200268	0.134452	0.403138	25.4259	18.5457	51.3173	2.044	2.30587	1.60067	0.1451	0.1118	1.39531
6	Yamagata	41	Machinery for office and service industry	0	0	0	0	0	0	0	0	0	0	0	0	0	0	0	0	0	0	0	0	0	0	0	0	0	0	0	0	0	0	0	0	0	0	0	0	0	0	0	0	34.1805	0	0	0	0	0
6	Yamagata	42	Industrial electric equipment	0.517483	0	0	0	0	0	0	0	0	0.0909113	0	0	0	0	0	0	0	0	0	0	0	0	0	0	0	0	0	0	0	0	0	0	0	0	0	0	0	34.1552	42.0776	0.352909	30.8015	148.98	47.983	7.38066	1.08321	32.5651
6	Yamagata	43	Applied electric equipment and electric mesuring instruments	0	0	0	0	0	0	0	0	0	0	0	0	0	0	0	0	0	0	0	0	0	0	0	0	0	0	0	0	0	0	0	0	0	0	0	0	0	1.39288	5.83718	0.386735	1.02676	7.81862	53.6551	0	0	1.33626
6	Yamagata	44	Other electric equipment	0.351577	0	0.00636999	0	0	0	0	0	0	0.262501	0	0	0	0	0	0	0	0	0	0.173033	0	0	0	0	0	0	0	0	0	0	0	0	0	0	0	0	0.537052	1.69974	4.88264	1.019	4.2771	10.8988	6.49065	39.7391	0.372345	42.667
6	Yamagata	45	Household electric and electric applications	0	0	0	0	0	0	0	0	0	0	0	0	0	0	0	0	0	0	0	0	0	0	0	0	0	0	0	0	0	0	0	0	0	0	0	0	0	0	0	0	0	0	0	0	0.356063	0
6	Yamagata	46	Communication equipment	0	0	0	0	0	0	0	0	0	0	0	0	0.324117	0	0	0	0	0	0	0	0.0945575	0	0	0	0	0	0	0	0	0	0	0	0	0	0	0	0	1.83578	0.344239	0	0	0.0492208	3.98791	0.0408842	0	68.9776
6	Yamagata	47	Electric computing equipment and accessory equipment	0	0	0	0	0	0	0	0	0	0	0	0	0	0	0	0	0	0	0	0	0	0	0	0	0	0	0	0	0	0	0	0	0	0	0	0	0	0	32.4285	0	0	0	0	0	0	6.27853
6	Yamagata	48	Semiconductor devices and integrated circuits	0	0	0	0	0	0	0	0	0	0	0	0	0	0	0	0	0	0	0	0	0	0	0	0	0	0	0	0	0	0	0	0	0	0	0	0	0.524203	1.90617	12.3912	3.36278	205.319	127.502	843.021	6.34755	7.63217	1095.03
6	Yamagata	49	Other electrical equipment	0	0	0	0	0	0	0	0	0	0	0	0.110095	5.33563	0	0	0	0	0	0	0	0	0	0	0	0	0	0	0	0	0	0	0	0	0	0.082572	0	0.221622	15.8491	33.2961	0.911097	135.083	94.8203	810.959	2.51268	4.56351	1059.7
6	Yamagata	50	Passenger motor cars	0	0	0	0	0	0	0	0	0	0	0	0	0	0	0	0	0	0	0	0	0	0	0	0	0	0	0	0	0	0	0	0	0	0	0	0	0	0	0	0	0	0	0	0	0	0
6	Yamagata	51	Other cars	0	0	0	0	0	0	0	0	0	0	0	0	0	0	0	0	0	0	0	0	0	0	0	0	0	0	0	0	0	0	0	0	0	0	0	0	0	0	0	0	0	0	0	0	0	0
6	Yamagata	52	Motor vheicle parts and accessories	0	0	0	0	0	0	0	0	0	0	0	0	0	0	0	0	0	0	0	0	0	0	0	0	0	0	0	0	0	0	0	0	0	0	0	0	0	0	0.063575	0	0	0	0	0	0	0
6	Yamagata	53	Other transportation equipment	0.234704	0	0	0	0	0	0	0	0	0	0	0	0	0	0	0	0	0	0	0	0	0	0	0	0	0	0	0	0	0	0	0	0	0	0	0	0	0	0	0	0	0	0	0	0	0
6	Yamagata	54	Precision instruments	1.73006	0	0	0	0	0	0.0145427	0.0134927	0.0166025	0	0.0238455	0.0466788	0.0502719	0	0	0	0	0	0	0.0681178	0.0293326	0	0	0.258027	0	0	0	0	0	0	0	0	0	0	0.0175047	0.0335769	0.0469824	5.83713	16.0606	0.0891445	5.01272	2.62622	4.37398	0.0126826	0.0195441	5.26526
6	Yamagata	55	Miscellaneous manufacturing products	2.63377	0	0.0318131	0	5.77081	0.902244	0.0922469	60.9946	0.807393	12.5272	0.100837	0.888273	1.9133	0	0	0	0.152825	0	0	1.24824	0	0	0.407712	0.606187	0.360282	1.28398	0.460591	0.132508	3.22111	0	0	1.32953	0.065418	0	0.592187	1.13591	0.794711	10.1746	3.20617	0.502629	0	0.516544	2.17973	0.13408	0.0413238	8.7853
6	Yamagata	56	Reuse and recycling	0	0	0	0	0	1.14582	0	0	0	0	0.0468952	0	0	0	0.042658	0	0	0	0	0	0	0	0	1.24909	0.00572829	0.0695199	0.0878779	0.00379226	0.00397349	0	0.233786	1.03496	0.0936101	0.665068	1.54649	0	0	0	0	0	0	0	0	0	0	0
6	Yamagata	57	Building construction and repair of construction	0	0	0	0	0	0	0	0	0	0	0	0	0	0	0	0	0	0	0	0	0	0	0	0	0	0	0	0	0	0	0	0	0	0	0	0	0	0	0	0	0	0	0	0	0	0
6	Yamagata	58	Public construction	0	0	0	0	0	0	0	0	0	0	0	0	0	0	0	0	0	0	0	0	0	0	0	0	0	0	0	0	0	0	0	0	0	0	0	0	0	0	0	0	0	0	0	0	0	0
6	Yamagata	59	Other civil enginnering and construction	0	0	0	0	0	0	0	0	0	0	0	0	0	0	0	0	0	0	0	0	0	0	0	0	0	0	0	0	0	0	0	0	0	0	0	0	0	0	0	0	0	0	0	0	0	0
6	Yamagata	60	Electricity	0	0	0	0	0	0	0	0	0	0	0	0	0	0	0	0	0	0	0	0	0	0	0	0	0	0	0	0	0	0	0	0	0	0	0	0	0	0	0	0	0	0	0	0	0	0
6	Yamagata	61	Gas supply and heat supply	0	0	0	0	0	0	0	0	0	0	0	0	0	0	0	0	0	0	0	0	0	0	0	0	0	0	0	0	0	0	0	0	0	0	0	0	0	0	0	0	0	0	0	0	0	0
6	Yamagata	62	Water supply and waste management services	0.278826	0	0.00449055	0	38.6727	4.38183	0.605479	0.283901	0.178383	0.771047	0.501734	1.5464	6.88679	0	0.495936	0	0.33005	0.00910102	0	8.85374	2.63947	0.115149	0.10359	1.9509	1.00863	0.231447	5.99758	0.0168337	0.952462	0	3.80515	0.112601	0.180064	0.237978	0.195914	1.02216	1.89299	6.10592	5.07701	1.55643	1.93338	1.66103	1.14061	0.312279	0.244987	2.50025
6	Yamagata	63	Commerce	21.6473	0	0.0554503	0	544.572	25.3048	2.1828	35.3867	6.02408	36.2916	5.97582	71.8769	281.351	0.0386681	3.76545	0	1.61762	0.0749209	0	85.7795	13.837	0.36768	3.56613	43.8099	24.3831	2.21323	38.9972	0.117581	4.4264	0	44.149	3.82577	30.237	0.928993	4.52754	19.7652	39.1	71.1376	86.0794	23.2361	54.2156	37.5379	78.4032	16.7713	2.11499	132.754
6	Yamagata	64	Financial and insurance	0	0	0	0	0	0	0	0	0	0	0	0	0	0	0	0	0	0	0	0	0	0	0	0	0	0	0	0	0	0	0	0	0	0	0	0	0	0	0	0	0	0	0	0	0	0
6	Yamagata	65	Real estate agencies and rental services	0	0	0	0	0	0	0	0	0	0	0	0	0	0	0	0	0	0	0	0	0	0	0	0	0	0	0	0	0	0	0	0	0	0	0	0	0	0	0	0	0	0	0	0	0	0
6	Yamagata	66	House rent	0	0	0	0	0	0	0	0	0	0	0	0	0	0	0	0	0	0	0	0	0	0	0	0	0	0	0	0	0	0	0	0	0	0	0	0	0	0	0	0	0	0	0	0	0	0
6	Yamagata	67	Transport	25.3854	0	0.683973	0	81.2213	8.17014	0.688931	5.02053	3.43202	7.2525	0.913971	11.4318	84.1039	0	1.37052	0	0.286374	0	0	19.5832	5.01508	0.72863	0.298956	9.72115	3.44627	1.17803	80.1276	0.035986	13.4911	0	23.0551	0.808792	3.95292	0.573357	1.35192	9.2835	14.7165	19.9308	15.6361	9.13709	9.66104	7.4305	17.1204	1.89347	0.286175	36.5464
6	Yamagata	68	Communication	0	0	0	0	0	0	0	0	0	0	0	0	0	0	0	0	0	0	0	0	0	0	0	0	0	0	0	0	0	0	0	0	0	0	0	0	0	0	0	0	0	0	0	0	0	0
6	Yamagata	69	Broadcasting	0	0	0	0	0	0	0	0	0	0	0	0	0	0	0	0	0	0	0	0	0	0	0	0	0	0	0	0	0	0	0	0	0	0	0	0	0	0	0	0	0	0	0	0	0	0
6	Yamagata	70	Information services	0.28617	0	0.00153628	0	1.12411	0.147049	0.0102458	0.065302	0.0198338	0.527571	0.0189911	0.513315	1.87638	0	0.0154242	0	0.00752763	0	0	0.397141	0.577289	0.000525255	0.0153572	0.646353	0.238936	0.0475087	0.279141	0.00230361	0.0329873	0	0.243972	0.0431451	0.111832	0.026405	0.0396786	0.142963	0.48931	1.04489	1.28159	0.456017	0.544898	1.1267	2.28085	0.409468	0.00598667	2.42389
6	Yamagata	71	﻿Internet based services	0.0103216	0	0	0	0.0478195	0.00895011	0.0012201	0.0192441	0.00232151	0.0494502	0.00133372	0.0404677	0.177846	0	0.00168982	0	0	0	0	0.0152397	0.117304	0.000479543	0.00107852	0.0865912	0.0127073	0.00367188	0.0263986	0	0.00257092	0	0.0116357	0.00562718	0.000865248	0.000803568	0.00538487	0.0328651	0.0427018	0.0852034	0.050768	0.02493	0.0309126	0.0708824	0.0415976	0.00744829	0.000546566	0.190528
6	Yamagata	72	Image information production and distribution industry	0.00436838	0	0.000278382	0	0.0353234	0.000783709	0.00104463	0.0159918	0.00059629	0.0124466	0.000545	0.022709	0.101275	0	0.00157833	0	0.000235995	0	0	0.0214995	0.00469287	5.59877e-05	0.000755514	0.0105777	0.0150833	0.00163442	0.0322434	4.09243e-05	0.00231552	0	0.00795686	0.000739108	0.00131325	0.000281455	0.000457233	0.00559117	0.0211693	0.0145032	0.0133887	0.00630636	0.0139328	0.0212376	0.034958	0.00496916	0.000638128	0.0428413
6	Yamagata	73	Public administration	0	0	0	0	0	0	0	0	0	0	0	0	0	0	0	0	0	0	0	0	0	0	0	0	0	0	0	0	0	0	0	0	0	0	0	0	0	0	0	0	0	0	0	0	0	0
6	Yamagata	74	Education and Research	0.038781	0	0.0012972	0	2.65299	0.247344	0.0241806	0.166764	0.0082816	0.620262	0.0101324	0.472583	0.178786	0.00426452	0.356481	0	0.106826	0.00450691	0	8.38299	6.45552	0.00316795	0.0377618	4.48201	2.41172	0.528654	1.04569	0.0118096	0.143878	0	0.900445	0.0543672	0.00171479	0.210217	0.207943	0.410654	0.3728	3.74334	6.88836	0.560501	5.7726	6.87188	11.7699	2.33722	0.162121	16.9717
6	Yamagata	75	Medical service, health and social security and nursing care	0.0980625	0	0.00336644	0	1.32433	0.250622	0.0097615	0.413589	0.0148587	0.200384	0.0266763	0.459538	0.556775	0	0.0495718	0	0.00646873	0	0	0.924612	0.659577	0.00383662	0.034515	0.724853	0.584579	0.0403937	0.991035	0.00280439	0.0117536	0	0.252679	0.0450207	0.152295	0.00964353	0.0117497	0.142739	0.452015	1.68189	1.10862	1.05711	1.41489	0.389455	0.434954	0.0454024	0.0087457	1.6937
6	Yamagata	76	Advertising and survery	0.687716	0	0.00192401	0	3.44116	1.38049	0.00717297	0.085037	0.0159229	0.899213	0.176748	1.93654	0.365738	0.000790648	0.0424976	0	0.00237668	0	0	12.9228	1.1309	0.00140962	0	1.29467	0.721643	0.021587	0.0935165	0.00343454	0.0417447	0	0.234535	0.0303254	0.0178038	0.00236209	0.0143899	0.13157	0.180237	0.603122	0.541335	0.470632	0.527596	0.484916	0.891851	0.142834	0.036417	1.753
6	Yamagata	77	Giids rental and leasing services	0.169753	0	0.00198113	0	1.46346	0.0721839	0.0229783	0.0775784	0.0228323	0.34336	0.0214551	0.462335	2.31237	0	0.0430224	0	0.00359532	0	0	0.26542	0.0396955	0.00727523	0.107766	0.805327	0.316322	0.0402193	0.657581	0.00238386	0.0511085	0	0.230441	0.0448933	0.0746871	0.00882802	0.0414876	0.182739	0.623435	2.1462	1.64916	0.92424	0.743899	1.57642	1.22856	0.227668	0.0180138	2.92892
6	Yamagata	78	Other business services	0	0	0	0	0	0	0	0	0	0	0	0	0	0	0	0	0	0	0	0	0	0	0	0	0	0	0	0	0	0	0	0	0	0	0	0	0	0	0	0	0	0	0	0	0	0
6	Yamagata	79	Personal services	4.43361	0	0	0	1.92536	0.0678939	0	0.317725	0.0316989	0.292301	0	0.475325	3.56739	0	0.0256374	0	0	0	0	0.650283	0.196016	0	0	0.766341	0.265087	0.0261133	0.554552	0	0.00835821	0	0.340454	0.032015	0.118145	0	0.022281	0.149585	0.418614	0.742985	0.611656	0.283671	0.425366	0.913443	0.581115	0.185647	0	1.19907
6	Yamagata	80	Activities not elsewhere classified	0	0	0	0	0	0	0	0	0	0	0	0	0	0	0	0	0	0	0	0	0	0	0	0	0	0	0	0	0	0	0	0	0	0	0	0	0	0	0	0	0	0	0	0	0	0
7	Fukushima	1	Agriculture, forestry and fishery	62.8684	0	0	0	1840.1	51.0405	4.74922	0.194396	53.501	0	0.200406	0.112087	0	0	0.290189	0	0.173559	0	0	2.72612	3.76826	0	1.57429	0	311.417	0	0	0	0.914529	0	0	0	0	0	0.0420331	0	0	0	0	0	0	0	0	0	0	0
7	Fukushima	2	Metallic ores	0	0	0	0	0	0	0	0	0	0	0	0	0	0	0	0	0	0	0	0	0	0	0	0	0	0	0	0	0	0	0	0	0	0	0	0	0	0	0	0	0	0	0	0	0	0
7	Fukushima	3	Non-metallic ores	0	0	0.10053	0	0	0	0	0	0	0	0.264821	0	0	0	0.894746	0	0.0156626	0	0	0.258316	0.0635629	-0.19508	0.104463	0	0.348728	25.0734	8.53617	0.244447	4.24035	0	0	0.163511	0	0.0155664	0.00948305	0.0727601	0.139988	0	0	0.482934	0	0	0	0	0	0
7	Fukushima	4	Coal mining, crude petroleum and natural gas	0	0	0	0	0	0	0	0	0	0	0	0	0	0	0	0	0	0	0	0	0	0	0	0	0	0	0	0	0	0	0	0	0	0	0	0	0	0	0	0	0	0	0	0	0	0
7	Fukushima	5	Food and Tobacco	23.9668	0	0	0	5456.88	151.342	0	4.72405	0.0377457	0	0.21685	0	0	0	0.0457918	0	0.032865	0	0	24.3655	5.26832	0	0	0.0651804	0	0	0	0	0.179146	0	0	0	0	0	0	0	0	0	0	0	0	0	0	0	0	0
7	Fukushima	6	Beverage	2.11791	0	0	0	7.17044	32.2698	0	0	0	0	0	0	0	0	0	0	0.0237006	0	0	0	0.0240459	0	0	0	0	0	0	0	0	0	0	0	0	0	0	0	0	0	0	0	0	0	0	0	0	0
7	Fukushima	7	Textile products	0.386982	0	0	0	0	0.00733467	3.48357	51.9652	0	0.858913	0.0623003	0.397962	0.684371	0	0	0	0	0	0	0.00624453	0	0	0	0.23654	3.60835	0.0157979	0	0	0.0939067	0	0	0	0	0	0.0192564	0.00923423	0.0516839	0.0313232	0.657843	0	0	0	0	0.00348795	0.0591247	0.0925265
7	Fukushima	8	Wearing aparel and other textile products	36.0629	0	0.111783	0	97.3725	2.29278	8.93681	44.6369	2.48456	7.45811	0.797213	18.2812	13.9259	0	0.577184	0	0.184111	0	0	11.2783	2.14811	0	4.2978	2.64728	5.66659	1.48935	6.47362	0	3.34527	0	7.19164	0.720767	2.26579	0.0914901	1.05898	2.45893	9.05043	13.6899	8.02426	10.9751	7.61204	23.7734	13.1298	1.85758	0.560063	34.8151
7	Fukushima	9	Timber and wooden products	2.16548	0	0	0	10.4535	0.45521	0	0.748471	85.261	170.993	20.5791	66.4274	0.965317	0	0	0	0	0	0	1.01733	0	0	0	1.10102	0.040394	1.73332	0.0774608	0.213934	0.868613	0	0	0.751282	0	0	1.64327	2.00586	4.3604	0.972003	1.13916	0.380388	4.8264	1.00987	1.13116	0.297649	0.0416982	1.29205
7	Fukushima	10	Furniture and fixtures	0.11844	0	0	0	9.87707	0.34234	0.112004	1.97443	0.0852452	65.9702	0.122434	2.9959	5.29148	0	0.155125	0	0.148446	0	0	4.13871	0.602432	0	0	3.23849	0.923499	0.105337	1.02527	0.0321778	0.60688	0	1.22074	0.258286	0	0	0.134817	0.1724	0.844308	1.09649	2.41248	0.839138	0.923921	1.45035	2.2685	0.260476	0.150523	13.9491
7	Fukushima	11	Pulp, paper, paperboard, building paper	0.0685062	0	0	0	3.80863	0.0792044	0.561461	0.160284	1.13404	8.59311	101.905	312.744	303.748	0	0.957068	0	0	0.120748	0	9.30567	0.0871124	0	0	2.80974	0.787178	0.389934	0	0	1.24808	0	0.353041	0	0.275654	0	0.155957	0	0.0697645	0.084562	0	0.264743	0	5.75886	0.0874741	0.0753302	0.0580424	2.4979
7	Fukushima	12	Paper products	8.90234	0	0	0	297.437	27.4981	0.474682	3.52327	0.0956317	13.1834	0	10.6653	13.8029	0.0554001	0.734775	0	0.111022	0	0	183.365	8.3916	0	0	5.00924	1.34501	3.56089	2.09127	0.312853	0.529529	0	0	0	0.178214	0	0.0336095	0	4.37507	1.42143	0.123019	1.25517	1.53006	2.1401	2.20558	0.730531	0.337727	7.62246
7	Fukushima	13	Publishing, printing	0.091588	0	0.00221256	0	64.7292	1.34128	0.0577411	2.87503	0.0659191	1.89447	0.00525983	21.5401	866.105	0	0.168827	0	0	0	0	21.7868	0.401151	0.00756478	0.0170135	0.189718	0.309039	0.608201	0.128134	0	0.104287	0	0.367104	0.144249	0.0272985	0.00633813	0.100391	0.207379	2.30067	1.99728	1.78074	0.812757	6.16927	0.794842	2.05307	0.078331	0.29315	11.5251
7	Fukushima	14	Chemical fertilizer	28.2854	0	0	0	0	0.151401	0	0	0	0	0	0	0	1.96559	6.74612	0	1.06682	0.115406	0	11.7298	3.4136	0	0	0	0	0	0	0	0.0745541	0	7.76073	0	0	0	0	0	0	0	0	0	0	0	0	0.0719977	0	0
7	Fukushima	15	Basic inorganic chemical products	0	0	0	0	118.564	3.56152	5.8909	0.0600611	0	0.511109	1.5391	4.1557	0.447558	1.02751	91.1817	0	10.4887	0.180986	0	413.588	62.5432	0	0	22.7162	79.8103	19.9447	3.23224	0	0.292298	0	31.4852	0.335883	0.137723	0.127906	0.15584	3.43765	2.82334	2.15471	2.18658	2.90998	1.25871	3.19444	6.42451	2.7663	0	8.31175
7	Fukushima	16	Basic organic chemical products	0	0	0	0	0	0	0	0	0	0	0	0	0	0	0	0	0	0	0	0	0	0	0	0	0	0	0	0	0	0	0	0	0	0	0	0	0	0	0	0	0	0	0	0	0	0
7	Fukushima	17	Organic chemical products	1.5326	0	0	0	14.3902	2.55159	4.53477	0.0239054	0.132368	0.122058	0.591467	0.248106	1.69229	0	2.14112	0	23.6395	1.53076	0	191.891	40.3932	0	0.0683275	26.7689	34.7178	0.312591	0	0	0.11634	0	0	0	0	0.0127272	0.232602	0.0297445	0.2081	0.933285	0.0189195	0.236909	3.37029	0.459884	0.10437	0.0561754	0.346268	0.372548
7	Fukushima	18	Synthetic resins	0	0	0	0	0	0	0.030974	0	0	0.136949	0.152363	0.397677	0.0856578	0	0	0	0	0	0	27.3527	0	0	0	38.9211	0	0	0	0	0.0391599	0	0	0	0	0	0.0223695	0	0	0	0	0.0379731	0.131402	1.20975	0	0.0486221	0.0499514	1.08918
7	Fukushima	19	Synthetic fibers	0	0	0	0	0	0	1.86785	6.24905	0	0.131575	0.0170781	0	0	0	0	0	0	0	0	0	0	0	0.0368274	0.177954	0.0361591	0	0	0	0	0	0	0	0	0	0	0	0	0	0	0	0	0	0	0	0	0
7	Fukushima	20	Final chemical products	2.033	0	0.0725696	0	14.5337	0.806881	1.20517	1.66836	2.97012	6.70602	1.89768	31.1922	538.88	0	5.45786	0	1.00781	0	0	264.836	17.5752	0.22556	1.77553	10.2955	3.63605	0.215891	1.48048	0	2.36671	0	0.703672	0.264683	0.0813964	0	0.299337	0.706679	4.51149	1.87274	1.7418	1.32897	13.8639	2.30974	1.95661	1.05102	0.0514171	5.50981
7	Fukushima	21	Medicaments	15.8693	0	0	0	0.917111	0	0	0.0125437	0	0	0	0	0	0	0	0	0	0	0	4.30621	25.7833	0	0	0	0	0	0	0	0	0	0	0	0	0	0	0	0	0	0	0	0	0	0	0	0	0
7	Fukushima	22	Petroleum refinery products	0.0129183	0	1.19774e-05	0	0.0326686	0.000286612	0.00105927	0.000177225	9.91231e-05	0.000548418	0.000370153	0.00105902	0.0328056	3.44536e-05	0.00271771	0	0.00144994	0	0	0.0073204	0.00026269	0.00270275	0.0103613	0.000376571	0.000972111	0.00264568	0.00125722	0.000119732	0.0012859	0	0.00787809	0.000180201	0	0.000120087	0.000313529	0.000882053	0.00288918	0.001326	0.000459038	0.000319336	0.000122781	0.000474033	0.000422049	0.000817778	0	0.0006026
7	Fukushima	23	Coal products	0	0	0	0	0	0	0	0	0	0	0.000217492	0	0	0	0.00085731	0	0.00105479	0	0	0.000138066	0	0	0	0	0	0	0	0	0.00295469	0	0.0390334	0.0137646	0	0.0017472	0.000638635	0.000204168	0	0	0.000519458	0.000180684	0	0	0	0	0	0.000204575
7	Fukushima	24	Plastic products	7.36302	0	0	0	150.298	18.3134	0.273057	7.67264	1.15786	18.9103	1.37516	64.106	569.45	0.0773949	1.6748	0	0.0387748	0	0	84.7788	13.4541	0	0	416.88	29.1499	1.12259	0.292153	0	0.493174	0	0	0	0	0.0385367	4.64835	1.9814	3.84365	4.58254	39.9861	5.10108	33.4418	23.2627	16.0777	21.67	1.41543	131.078
7	Fukushima	25	Rubber products	20.6457	0	0.0446646	0	18.4493	0.356266	0.32378	4.98668	0.221783	3.06764	0.212359	4.15703	22.497	0	0.0896864	0	0.193106	0	0	2.62873	1.11021	0	0.343449	2.55321	86.5804	0	5.98158	0	2.4561	0	8.734	0.111997	0.137768	0	0.0779451	5.98045	4.28867	50.8421	45.8379	8.20349	60.2086	24.7479	21.7717	4.68729	1.04431	55.804
7	Fukushima	26	Glass and glass products	0.119538	0	0	0	30.8431	86.3783	0	0	0	39.3897	0	0	0.39077	0	1.14813	0	0	0	0	113.899	13.9844	0	0	12.1826	0.588669	13.9057	0.188142	0	1.76946	0	0	0	0	0	0	0.869991	1.4608	1.62309	0.22135	0	8.25915	0.474743	16.103	7.68954	0.405117	4.18429
7	Fukushima	27	Cement and cement products	0	0	0	0	0	0	0	0	0	0	0	0	0	0	0	0	0	0	0	0	0	0	0	0	0	0	29.6718	0	0.0180389	0	0	0	0	0	0	0	0	0	0	0	0	0	0	0	0	0
7	Fukushima	28	Pottery, china and earthenware	0	0	0	0	0.650386	0	0	0	0	0.619363	0	0	0	0	0.0181078	0	0	0	0	0.0204133	0	0	0	0.0257749	0	0	0.0326403	0.056342	0	0	0	0	0	0	0	0	0.0422385	0.0255988	0	0	0	0.796168	0.0529607	0.0114021	0	0.725923
7	Fukushima	29	Other ceramic, stone and clay products	0.491478	0	0	0	1.8683	0	0	0	0	0.815461	0.141126	0	0.178517	0	4.19602	0	0	0	0	0.698786	0.416643	0	5.11268	0.67871	0.179282	2.0204	144.309	0.326395	17.7215	0	2.11066	1.66722	0	0.0340116	0.372957	1.19232	4.33772	35.6585	5.30878	4.22072	0.365134	4.15683	1.67349	1.62131	0.0462676	2.82746
7	Fukushima	30	Pig iron and crude steel	0	0	0	0	0	0	0	0	0	0	0	0	0	0	0.00269904	0	0	0	0	0	0	0	0	0	0	0	0	0	0	0	-3.60812	1.04653	-0.897611	0	0	-0.0899885	-0.938077	-0.299524	-0.641075	-0.0497737	-0.0361697	-0.0859348	-0.00098675	-0.00509857	-0.00523796	-0.0439569
7	Fukushima	31	steel products	0.00307907	0	0	0	0	0	0	0	0.0110806	1.45754	0	0	0	0	0	0	0	0	0	0	0	0	0	0.151161	0.180693	0	0.411926	0	0.00701201	0	32.8621	0.38945	21.3946	0	0.012851	2.41349	10.1375	3.29902	3.57488	1.09472	0.61935	2.50787	0.388246	0.463853	0.0665236	0.564721
7	Fukushima	32	Cast and forged steel products	0	0	0	0	0	0	0	0	0	0.854139	0	0	0	0	0	0	0	0	0	0	0	0	0	0	0	0	0	0	0.0488474	0	0	0	0	0	0.0651079	9.74122	7.51419	90.1268	45.7557	47.9669	11.856	17.8325	3.56051	0.613242	0.0726933	1.00109
7	Fukushima	33	Other iron or steel products	0	0	0	0	0	0	0	0	0	21.2635	0	0	0	0	0.0208147	0	0	0	0	0.0351971	0	0	0	0.0296278	0	0	0.393955	0	0.135719	0	0	0.337904	0	0	0.0452243	34.2132	66.2378	25.9679	17.4581	3.25504	4.90131	6.67452	0.0760969	1.62521	0.757397	9.50042
7	Fukushima	34	Non-ferrous metals	0	0	0	0	0	0	0	0	0	4.4323	0.0767069	0	-54.6601	0	84.7479	0	2.23208	0	0	240.305	0	0	0	4.61127	-0.121807	7.39142	0	0.403197	7.01292	0	724.276	2.10366	-1.59243	135.228	956.702	-7.99282	149.925	-11.1746	18.8245	11.4705	-3.4731	48.9204	7.48523	583.084	0.25148	23.1605
7	Fukushima	35	Non-ferrous metal products	0	0	0	0	4.71073	0.251356	0	0	0.0625896	11.3843	0	0.351949	4.59586	0	0.189829	0	0	0	0	1.24119	0.0829357	0	0	3.35053	2.24831	0.0773413	0	0	0.321815	0	0	0	0	0.297891	33.4244	18.5442	32.9884	42.6153	24.5166	22.5164	12.1622	48.1502	38.8918	72.6986	1.32623	178.963
7	Fukushima	36	Metal products for construction and architecture	0.0262041	0	0	0	0	0	0	0	0	0.260867	0	0	0	0	0	0	0	0	0	0	0	0	0	0	0	0	0	0	0	0	0	0	0	0	0	4.38639	0.667136	0.161728	0	0.135021	0	0	0	0	0	0.0573279
7	Fukushima	37	Other metal products	1.47139	0	0.023697	0	59.0406	34.9054	0	8.51086	7.29538	63.4201	0.366169	3.7494	7.36343	0	2.42675	0	0.478113	0	0	49.4039	4.95472	0.16204	0.819981	3.79291	25.4054	1.66726	3.34509	0	8.59419	0	0	1.66377	0.073093	0	1.24062	97.4094	223.208	118.593	86.5308	43.8749	72.3292	37.9112	27.799	5.48307	1.98539	54.1669
7	Fukushima	38	General industrial machinery	0	0	0	0	0	0	0	0	0	0.254204	0	0	0	0	0	0	0	0	0	0	0	0	0	4.96238	0	0.0165162	0.0365359	0	0.30397	0	0	0.177178	0.249082	0	0.0352309	0.135157	1.01651	446.687	59.4263	12.6489	16.3492	4.87081	4.60914	0.0765774	0.295017	0.897203
7	Fukushima	39	Special industrial machinery	0	0	0	0	0	0	0	0	0	0	0	0	0	0	0	0	0	0	0	0	0	0	0	0	0	0	0	0	0	0	0	0	0	0	0	0	0	1.12952	464.343	0	0.0637335	0	0.0365131	0.282996	0	0
7	Fukushima	40	Other general machines	0	0	0	0	0	0	0	0	0	2.34878	0	0	0	0	0	0	0	0	0	0.143356	0	0	0	0.39822	0	0.0207243	0	0	0.116083	0	0	0.1588	0	0	0.0442072	0.296788	0.889886	56.125	40.9377	113.278	4.51192	5.08996	3.53331	0.320293	0.246788	3.08
7	Fukushima	41	Machinery for office and service industry	0	0	0	0	0	0	0	0	0	0	0	0	0	0	0	0	0	0	0	0	0	0	0	0	0	0	0	0	0	0	0	0	0	0	0	0	0	0	0	0	18.293	0	0	0	0	0
7	Fukushima	42	Industrial electric equipment	0.561629	0	0	0	0	0	0	0	0	0.098667	0	0	0	0	0	0	0	0	0	0	0	0	0	0	0	0	0	0	0	0	0	0	0	0	0	0	0	37.0689	45.6672	0.383015	33.4292	161.69	52.0765	8.0103	1.17562	35.3432
7	Fukushima	43	Applied electric equipment and electric mesuring instruments	0	0	0	0	0	0	0	0	0	0	0	0	0	0	0	0	0	0	0	0	0	0	0	0	0	0	0	0	0	0	0	0	0	0	0	0	0	6.66537	27.9327	1.85065	4.91339	37.4145	256.756	0	0	6.39441
7	Fukushima	44	Other electric equipment	1.67409	0	0.0303318	0	0	0	0	0	0	1.24994	0	0	0	0	0	0	0	0	0	0.823926	0	0	0	0	0	0	0	0	0	0	0	0	0	0	0	0	2.55727	8.0936	23.2496	4.85216	20.3661	51.8964	30.9063	189.224	1.77298	203.166
7	Fukushima	45	Household electric and electric applications	0	0	0	0	0	0	0	0	0	0	0	0	0	0	0	0	0	0	0	0	0	0	0	0	0	0	0	0	0	0	0	0	0	0	0	0	0	0	0	0	0	0	0	0	1.63486	0
7	Fukushima	46	Communication equipment	0	0	0	0	0	0	0	0	0	0	0	0	0.674061	0	0	0	0	0	0	0	0.19665	0	0	0	0	0	0	0	0	0	0	0	0	0	0	0	0	3.81785	0.715909	0	0	0.102364	8.29359	0.0850263	0	143.452
7	Fukushima	47	Electric computing equipment and accessory equipment	0	0	0	0	0	0	0	0	0	0	0	0	0	0	0	0	0	0	0	0	0	0	0	0	0	0	0	0	0	0	0	0	0	0	0	0	0	0	31.222	0	0	0	0	0	0	6.04494
7	Fukushima	48	Semiconductor devices and integrated circuits	0	0	0	0	0	0	0	0	0	0	0	0	0	0	0	0	0	0	0	0	0	0	0	0	0	0	0	0	0	0	0	0	0	0	0	0	0.585732	2.12991	13.8456	3.75749	229.419	142.468	941.971	7.0926	8.528	1223.56
7	Fukushima	49	Other electrical equipment	0	0	0	0	0	0	0	0	0	0	0	0.101455	4.91691	0	0	0	0	0	0	0	0	0	0	0	0	0	0	0	0	0	0	0	0	0	0.0760919	0	0.20423	14.6053	30.6831	0.839596	124.482	87.3791	747.317	2.31549	4.20537	976.533
7	Fukushima	50	Passenger motor cars	0	0	0	0	0	0	0	0	0	0	0	0	0	0	0	0	0	0	0	0	0	0	0	0	0	0	0	0	0	0	0	0	0	0	0	0	0	0	0	0	0	0	0	0	0	0
7	Fukushima	51	Other cars	0	0	0	0	0	0	0	0	0	0	0	0	0	0	0	0	0	0	0	0	0	0	0	0	0	0	0	0	0	0	0	0	0	0	0	0	0	0	0	0	0	0	0	0	0	0
7	Fukushima	52	Motor vheicle parts and accessories	0	0	0	0	0	0	0	0	0	0	0	0	0	0	0	0	0	0	0	0	0	0	0	0	0	0	0	0	0	0	0	0	0	0	0	0	0	0	0.203725	0	0	0	0	0	0	0
7	Fukushima	53	Other transportation equipment	2.67185	0	0	0	0	0	0	0	0	0	0	0	0	0	0	0	0	0	0	0	0	0	0	0	0	0	0	0	0	0	0	0	0	0	0	0	0	0	0	0	0	0	0	0	0	0
7	Fukushima	54	Precision instruments	8.36241	0	0	0	0	0	0.0702937	0.0652184	0.0802496	0	0.115259	0.225626	0.242994	0	0	0	0	0	0	0.329254	0.141782	0	0	1.2472	0	0	0	0	0	0	0	0	0	0	0.0846107	0.162297	0.227094	28.2143	77.6304	0.430888	24.2295	12.6941	21.142	0.0613028	0.0944682	25.4501
7	Fukushima	55	Miscellaneous manufacturing products	1.9742	0	0.0238461	0	4.32563	0.676295	0.0691455	45.7197	0.605197	9.39001	0.0755844	0.665823	1.43415	0	0	0	0.114553	0	0	0.93564	0	0	0.305608	0.454379	0.270056	0.962431	0.345245	0.0993242	2.41444	0	0	0.996574	0.0490354	0	0.443886	0.851444	0.595691	7.62656	2.40325	0.376755	0	0.387185	1.63386	0.100502	0.030975	6.5852
7	Fukushima	56	Reuse and recycling	0	0	0	0	0	3.59504	0	0	0	0	0.147135	0	0	0	0.13384	0	0	0	0	0	0	0	0	3.91904	0.0179726	0.21812	0.275718	0.0118983	0.0124669	0	0.733507	3.24719	0.293703	2.08666	4.85213	0	0	0	0	0	0	0	0	0	0	0
7	Fukushima	57	Building construction and repair of construction	0	0	0	0	0	0	0	0	0	0	0	0	0	0	0	0	0	0	0	0	0	0	0	0	0	0	0	0	0	0	0	0	0	0	0	0	0	0	0	0	0	0	0	0	0	0
7	Fukushima	58	Public construction	0	0	0	0	0	0	0	0	0	0	0	0	0	0	0	0	0	0	0	0	0	0	0	0	0	0	0	0	0	0	0	0	0	0	0	0	0	0	0	0	0	0	0	0	0	0
7	Fukushima	59	Other civil enginnering and construction	0	0	0	0	0	0	0	0	0	0	0	0	0	0	0	0	0	0	0	0	0	0	0	0	0	0	0	0	0	0	0	0	0	0	0	0	0	0	0	0	0	0	0	0	0	0
7	Fukushima	60	Electricity	158.156	0	8.79347	0	5598.53	388.741	69.6439	233.745	114.7	327.516	155.378	403.106	3873.67	1.51014	177.1	0	65.8225	0.531993	0	1189.57	102.091	111.285	70.6451	1201.16	738.717	83.5366	379.087	5.248	146.406	0	1961.4	379.124	214.558	174.825	97.1127	321.593	1195.67	982.824	1012.16	468.895	270.427	459.501	215.05	112.179	76.7171	806.467
7	Fukushima	61	Gas supply and heat supply	0.000589583	0	0	0	1.12958	0.111451	0.0107793	0.00655236	0.000848687	0.0134997	0.00304734	0.0602499	0.0192735	0	0.00566279	0	0.00369475	0	0	0.0992384	0.0357988	0	0.00147855	0.120174	0.0285504	0.0410047	0.0167031	0.00176196	0.00419583	0	0.304596	0.020893	0.00118618	0.00312125	0.00738216	0.0296076	0.104472	0.0451214	0.0302957	0.0140504	0.022339	0.0357083	0.0131745	0.0238255	0.000999057	0.0980291
7	Fukushima	62	Water supply and waste management services	0.341104	0	0.00549354	0	47.3105	5.36054	0.740716	0.347312	0.218226	0.943266	0.6138	1.8918	8.425	0	0.606706	0	0.403769	0.0111338	0	10.8313	3.22901	0.140869	0.126728	2.38665	1.23391	0.283142	7.33718	0.0205936	1.1652	0	4.65505	0.137751	0.220282	0.291132	0.239672	1.25047	2.3158	7.46971	6.211	1.90407	2.36522	2.03204	1.39537	0.382028	0.299707	3.0587
7	Fukushima	63	Commerce	47.0061	0	0.120408	0	1182.51	54.9483	4.73986	76.8407	13.081	78.8056	12.9762	156.078	610.942	0.0839661	8.17652	0	3.51259	0.162687	0	186.267	30.0465	0.798401	7.74371	95.1313	52.9468	4.80594	84.6807	0.255322	9.61173	0	95.8677	8.3075	65.6585	2.01727	9.83135	42.9193	84.9039	154.472	186.918	50.4563	117.727	81.512	170.249	36.4182	4.5926	288.27
7	Fukushima	64	Financial and insurance	0.809061	0	0.00475422	0	2.87626	0.298205	0.133156	1.56448	0.0908518	1.04687	0.111479	1.84336	4.63766	0.000621627	0.0807111	0	0.0158832	0.000437973	0	0.674575	0.159881	0.0391591	0.00997028	0.571336	0.550651	0.122695	2.41068	0.0075609	0.156747	0	0.678686	0.0774884	0.300619	0.144238	0.0452546	0.428965	0.502553	1.51827	1.10245	1.15488	0.436408	0.664479	0.515585	0.0721341	0.0248425	1.13834
7	Fukushima	65	Real estate agencies and rental services	0.0786711	0	0.000171047	0	0.37233	0.0331992	0.00669569	0.140351	0.00311423	0.132359	0.0158583	0.256307	0.436344	0	0.0120212	0	0.00197204	0	0	0.0782124	0.0477682	0.00116962	0.0105221	0.338309	0.0868466	0.00587728	0.36032	0.000641202	0.0109735	0	0.0922343	0.0223029	0.0163554	0.0056348	0.00447746	0.0417973	0.126984	0.212669	0.218515	0.131238	0.044712	0.17679	0.140886	0.0532023	0.0049991	0.160925
7	Fukushima	66	House rent	0	0	0	0	0	0	0	0	0	0	0	0	0	0	0	0	0	0	0	0	0	0	0	0	0	0	0	0	0	0	0	0	0	0	0	0	0	0	0	0	0	0	0	0	0	0
7	Fukushima	67	Transport	94.8689	0	2.5561	0	303.536	30.533	2.57463	18.7625	12.826	27.1036	3.41564	42.7222	314.308	0	5.12185	0	1.07022	0	0	73.1853	18.7421	2.723	1.11724	36.3293	12.8792	4.40247	299.448	0.134485	50.4183	0	86.1601	3.02257	14.7726	2.14272	5.05234	34.6938	54.9978	74.4842	58.4345	34.1466	36.1047	27.7688	63.9813	7.07617	1.06948	136.579
7	Fukushima	68	Communication	0.482247	0	0.00319216	0	0.552218	0.0339496	0.0156643	0.332945	0.00325143	0.44186	0.0180959	0.495931	3.05942	0	0.0256394	0	0.00353877	0	0	0.531384	1.38012	0.0428166	0.045316	0.526375	0.538559	0.0381687	0.0906551	0	0.0308635	0	0.194977	0.0578779	0.0136332	0.0583829	0.055707	0.410981	0.434749	1.52094	0.697448	0.45682	0.432952	0.601784	0.560251	0.0738922	0.0114826	0.887843
7	Fukushima	69	Broadcasting	0	0	0	0	0	0	0	0	0	0	0	0	0	0	0	0	0	0	0	0	0	0	0	0	0	0	0	0	0	0	0	0	0	0	0	0	0	0	0	0	0	0	0	0	0	0
7	Fukushima	70	Information services	0.0473398	0	0.000254139	0	0.185956	0.0243256	0.00169491	0.0108026	0.00328102	0.0872736	0.0031416	0.0849153	0.310401	0	0.00255155	0	0.00124526	0	0	0.0656971	0.0954982	8.68904e-05	0.00254047	0.106923	0.0395261	0.00785914	0.046177	0.000381076	0.00545693	0	0.0403591	0.00713728	0.0184998	0.00436806	0.00656384	0.0236497	0.0809442	0.172852	0.212007	0.0754366	0.0901398	0.186385	0.37731	0.0677364	0.000990346	0.400972
7	Fukushima	71	﻿Internet based services	0.00100273	0	0	0	0.00464558	0.000869487	0.00011853	0.00186953	0.00022553	0.004804	0.000129568	0.00393137	0.0172774	0	0.000164163	0	0	0	0	0.00148051	0.0113959	4.65867e-05	0.000104776	0.00841217	0.00123449	0.000356717	0.00256458	0	0.00024976	0	0.00113038	0.00054667	8.40573e-05	7.80652e-05	0.00052313	0.00319279	0.0041484	0.00827735	0.00493202	0.0024219	0.0030031	0.00688609	0.00404113	0.000723588	5.30979e-05	0.0185094
7	Fukushima	72	Image information production and distribution industry	0.00755812	0	0.000481653	0	0.0611162	0.00135596	0.0018074	0.0276689	0.00103169	0.021535	0.000942953	0.0392909	0.175225	0	0.0027308	0	0.000408315	0	0	0.0371983	0.00811956	9.68693e-05	0.00130718	0.0183015	0.026097	0.00282786	0.0557872	7.08067e-05	0.00400629	0	0.0137669	0.0012788	0.00227218	0.00048697	0.000791099	0.00967378	0.0366269	0.0250932	0.0231649	0.0109112	0.0241064	0.036745	0.060484	0.00859759	0.00110408	0.0741235
7	Fukushima	73	Public administration	0	0	0	0	0	0	0	0	0	0	0	0	0	0	0	0	0	0	0	0	0	0	0	0	0	0	0	0	0	0	0	0	0	0	0	0	0	0	0	0	0	0	0	0	0	0
7	Fukushima	74	Education and Research	2.77006	0	0.0926565	0	189.498	17.6673	1.72718	11.9117	0.59154	44.3042	0.723738	33.7558	12.7704	0.304608	25.4628	0	7.63041	0.321921	0	598.783	461.106	0.226281	2.69726	320.142	172.265	37.7608	74.692	0.843542	10.277	0	64.3172	3.88335	0.122485	15.0155	14.853	29.3323	26.6285	267.38	492.024	40.0356	412.327	490.846	840.706	166.944	11.58	1212.26
7	Fukushima	75	Medical service, health and social security and nursing care	0.148294	0	0.00509086	0	2.0027	0.379	0.0147617	0.625446	0.02247	0.303029	0.0403409	0.694932	0.841977	0	0.0749645	0	0.00978227	0	0	1.39823	0.997439	0.00580189	0.0521949	1.09615	0.884024	0.0610849	1.49868	0.0042409	0.0177743	0	0.38211	0.0680821	0.230306	0.0145833	0.0177683	0.215856	0.683555	2.54343	1.67649	1.5986	2.13966	0.588948	0.657754	0.0686593	0.0132256	2.56128
7	Fukushima	76	Advertising and survery	0.0228926	0	6.40465e-05	0	0.114549	0.0459535	0.000238773	0.00283071	0.000530039	0.0299329	0.00588356	0.0644633	0.0121747	2.6319e-05	0.00141466	0	7.91149e-05	0	0	0.430172	0.0376454	4.69233e-05	0	0.043097	0.024022	0.000718588	0.00311297	0.000114329	0.00138959	0	0.0078072	0.00100947	0.000592652	7.86292e-05	0.000479008	0.00437969	0.00599971	0.0200767	0.0180199	0.0156664	0.0175626	0.0161419	0.0296879	0.00475465	0.00121225	0.0583538
7	Fukushima	77	Giids rental and leasing services	0.167497	0	0.0019548	0	1.44402	0.0712247	0.022673	0.0765475	0.0225289	0.338797	0.02117	0.456192	2.28164	0	0.0424507	0	0.00354754	0	0	0.261894	0.039168	0.00717856	0.106334	0.794626	0.312119	0.0396849	0.648843	0.00235218	0.0504294	0	0.227379	0.0442968	0.0736947	0.00871071	0.0409363	0.180311	0.615151	2.11768	1.62724	0.911959	0.734014	1.55547	1.21223	0.224643	0.0177744	2.89
7	Fukushima	78	Other business services	0.220378	0	0.00337088	0	3.13892	0.146816	0.0300214	0.361883	0.0544655	0.704844	0.0330078	1.23104	11.0979	0.00046174	0.112812	0	0.00879059	0.000650646	0	0.897492	0.462831	0.0164644	0.0518409	2.00126	1.10647	0.198558	1.72324	0.0018052	0.104872	0	0.325302	0.151743	0.0475312	0.0717323	0.0677899	0.417499	0.744705	2.14205	1.64496	0.575853	1.08479	1.25885	2.78686	0.351928	0.0469139	2.38751
7	Fukushima	79	Personal services	5.45698	0	0	0	2.36978	0.0835652	0	0.391063	0.0390157	0.359771	0	0.58504	4.39082	0	0.031555	0	0	0	0	0.800382	0.24126	0	0	0.943229	0.326275	0.0321408	0.682554	0	0.0102875	0	0.419038	0.0394048	0.145415	0	0.027424	0.184113	0.515239	0.914482	0.752839	0.349148	0.52355	1.12428	0.715249	0.228498	0	1.47584
7	Fukushima	80	Activities not elsewhere classified	0	0	0	0	0	0	0	0	0	0	0	0	0	0	0	0	0	0	0	0	0	0	0	0	0	0	0	0	0	0	0	0	0	0	0	0	0	0	0	0	0	0	0	0	0	0
8	Ibaraki	1	Agriculture, forestry and fishery	98.0407	0	0	0	2869.56	79.5955	7.4062	0.303153	83.4325	0	0.312525	0.174795	0	0	0.452538	0	0.270658	0	0	4.25128	5.87645	0	2.45504	0	485.642	0	0	0	1.42617	0	0	0	0	0	0.0655489	0	0	0	0	0	0	0	0	0	0	0
8	Ibaraki	2	Metallic ores	0	0	0	0	0	0	0	0	0	0	0	0	0	0	0	0	0	0	0	0	0	0	0	0	0	0	0	0	0	0	0	0	0	0	0	0	0	0	0	0	0	0	0	0	0	0
8	Ibaraki	3	Non-metallic ores	0	0	1.01649	0	0	0	0	0	0	0	2.67769	0	0	0	9.04707	0	0.158369	0	0	2.61192	0.642705	-1.97252	1.05626	0	3.5261	253.526	86.3119	2.47168	42.8756	0	0	1.65331	0	0.157397	0.0958861	0.7357	1.41546	0	0	4.8831	0	0	0	0	0	0
8	Ibaraki	4	Coal mining, crude petroleum and natural gas	0	0	0	0	0	0	0	0	0	0	0	0	0	0	0	0	0	0	0	0	0	0	0	0	0	0	0	0	0	0	0	0	0	0	0	0	0	0	0	0	0	0	0	0	0	0
8	Ibaraki	5	Food and Tobacco	52.4096	0	0	0	11932.9	330.947	0	10.3303	0.0825405	0	0.474199	0	0	0	0.100135	0	0.0718678	0	0	53.2814	11.5205	0	0	0.142534	0	0	0	0	0.39175	0	0	0	0	0	0	0	0	0	0	0	0	0	0	0	0	0
8	Ibaraki	6	Beverage	6.07364	0	0	0	20.563	92.5416	0	0	0	0	0	0	0	0	0	0	0.0679674	0	0	0	0.0689575	0	0	0	0	0	0	0	0	0	0	0	0	0	0	0	0	0	0	0	0	0	0	0	0	0
8	Ibaraki	7	Textile products	2.87381	0	0	0	0	0.0544689	25.8698	385.905	0	6.37848	0.462656	2.95536	5.08229	0	0	0	0	0	0	0.0463732	0	0	0	1.7566	26.7964	0.117319	0	0	0.697372	0	0	0	0	0	0.143002	0.0685754	0.383816	0.232613	4.88529	0	0	0	0	0.0259023	0.439073	0.687122
8	Ibaraki	8	Wearing aparel and other textile products	13.2356	0	0.041026	0	35.7371	0.841482	3.27993	16.3824	0.911867	2.73723	0.292588	6.70944	5.111	0	0.211835	0	0.0675711	0	0	4.13928	0.788387	0	1.57735	0.971587	2.07972	0.54661	2.37591	0	1.22776	0	2.63943	0.264531	0.831577	0.0335781	0.38866	0.902462	3.32163	5.0244	2.94501	4.02803	2.79372	8.72515	4.8188	0.681756	0.205551	12.7776
8	Ibaraki	9	Timber and wooden products	3.53387	0	0	0	17.0592	0.742861	0	1.22144	139.138	279.044	33.5832	108.403	1.57531	0	0	0	0	0	0	1.66018	0	0	0	1.79677	0.0659193	2.82862	0.126409	0.349121	1.4175	0	0	1.22602	0	0	2.68167	3.27337	7.11577	1.58622	1.85901	0.620758	7.87625	1.64802	1.84595	0.485736	0.0680476	2.10851
8	Ibaraki	10	Furniture and fixtures	0.140112	0	0	0	11.6844	0.404982	0.132499	2.33572	0.100844	78.0416	0.144838	3.5441	6.25973	0	0.18351	0	0.175609	0	0	4.89602	0.712667	0	0	3.83108	1.09248	0.124611	1.21288	0.0380658	0.717928	0	1.44411	0.305548	0	0	0.159486	0.203946	0.998801	1.29713	2.85393	0.992686	1.09298	1.71574	2.6836	0.308138	0.178067	16.5015
8	Ibaraki	11	Pulp, paper, paperboard, building paper	0.0578945	0	0	0	3.21867	0.0669356	0.474489	0.135455	0.958379	7.26202	86.12	264.299	256.697	0	0.808816	0	0	0.102044	0	7.86421	0.0736186	0	0	2.37451	0.665243	0.329533	0	0	1.05475	0	0.298355	0	0.232955	0	0.131799	0	0.0589579	0.0714632	0	0.223734	0	4.8668	0.0739242	0.0636615	0.0490515	2.11097
8	Ibaraki	12	Paper products	23.1848	0	0	0	774.631	71.6146	1.23624	9.17584	0.249058	34.3343	0	27.7763	35.9475	0.144281	1.91361	0	0.289139	0	0	477.546	21.8547	0	0	13.0458	3.50287	9.2738	5.44639	0.814778	1.37908	0	0	0	0.464132	0	0.0875311	0	11.3942	3.70191	0.320385	3.26891	3.98481	5.57356	5.7441	1.90256	0.87956	19.8516
8	Ibaraki	13	Publishing, printing	0.196886	0	0.00475633	0	139.148	2.88335	0.124126	6.18044	0.141706	4.07253	0.011307	46.3046	1861.86	0	0.362927	0	0	0	0	46.835	0.862352	0.0162619	0.0365739	0.407836	0.664338	1.30744	0.27545	0	0.224186	0	0.789162	0.310091	0.0586834	0.013625	0.215809	0.4458	4.94573	4.29354	3.82805	1.74718	13.262	1.70867	4.41346	0.168388	0.630183	24.7753
8	Ibaraki	14	Chemical fertilizer	18.7155	0	0	0	0	0.100177	0	0	0	0	0	0	0	1.30056	4.46367	0	0.705879	0.0763603	0	7.76118	2.25866	0	0	0	0	0	0	0	0.0493299	0	5.135	0	0	0	0	0	0	0	0	0	0	0	0	0.0476384	0	0
8	Ibaraki	15	Basic inorganic chemical products	0	0	0	0	213.139	6.40242	10.5899	0.10797	0	0.918804	2.7668	7.47056	0.80456	1.84712	163.914	0	18.8552	0.325352	0	743.494	112.432	0	0	40.8362	143.472	35.854	5.8105	0	0.525455	0	56.5999	0.603806	0.24758	0.229931	0.280148	6.17975	5.07542	3.87345	3.93074	5.23117	2.26274	5.74254	11.5491	4.97289	0	14.9418
8	Ibaraki	16	Basic organic chemical products	0	0	0	0	0	0	0	0	0	0	0	0	1.86798	0	0	0	2.21569	0	0	30.162	0.749323	0	0	0	0.0879368	0	0	0	0	0	0	0	0	0	0	0	0	0.132252	0	0	0	0	0	0	0	0
8	Ibaraki	17	Organic chemical products	20.4109	0	0	0	191.647	33.9816	60.3934	0.318368	1.76285	1.62555	7.87706	3.30424	22.5377	0	28.5151	0	314.827	20.3864	0	2555.57	537.95	0	0.909974	356.503	462.366	4.16304	0	0	1.5494	0	0	0	0	0.169498	3.09775	0.396132	2.77144	12.4293	0.251967	3.15512	44.885	6.12466	1.38999	0.748135	4.61154	4.96153
8	Ibaraki	18	Synthetic resins	0	0	0	0	0	0	0.714034	0	0	3.15704	3.51237	9.16753	1.97464	0	0	0	0	0	0	630.552	0	0	0	897.236	0	0	0	0	0.902741	0	0	0	0	0	0.515678	0	0	0	0	0.875381	3.02916	27.8881	0	1.12087	1.15151	25.1085
8	Ibaraki	19	Synthetic fibers	0	0	0	0	0	0	0	0	0	0	0	0	0	0	0	0	0	0	0	0	0	0	0	0	0	0	0	0	0	0	0	0	0	0	0	0	0	0	0	0	0	0	0	0	0	0
8	Ibaraki	20	Final chemical products	6.40965	0	0.228798	0	45.8219	2.54394	3.79967	5.26002	9.36421	21.1428	5.98303	98.3429	1698.99	0	17.2076	0	3.17743	0	0	834.979	55.4113	0.711148	5.59792	32.4597	11.4638	0.680662	4.66768	0	7.46179	0	2.21854	0.834493	0.256627	0	0.943752	2.22802	14.2239	5.90439	5.49155	4.18998	43.7102	7.28216	6.1688	3.31368	0.162108	17.3714
8	Ibaraki	21	Medicaments	41.4678	0	0	0	2.39649	0	0	0.0327778	0	0	0	0	0	0	0	0	0	0	0	11.2525	67.3739	0	0	0	0	0	0	0	0	0	0	0	0	0	0	0	0	0	0	0	0	0	0	0	0	0
8	Ibaraki	22	Petroleum refinery products	48.3055	0	0.0447872	0	122.158	1.07173	3.96095	0.662698	0.370652	2.05071	1.38412	3.96002	122.67	0.128833	10.1624	0	5.42179	0	0	27.3732	0.98228	10.1064	38.744	1.40812	3.63502	9.89302	4.70112	0.447716	4.80839	0	29.4586	0.673827	0	0.449042	1.17238	3.29827	10.8035	4.95831	1.71648	1.1941	0.459116	1.77255	1.57817	3.05793	0	2.25331
8	Ibaraki	23	Coal products	0	0	0	0	0	0	0	0	0	0	0.423496	0	0	0	1.66933	0	2.05387	0	0	0.268838	0	0	0	0	0	0	0	0	5.75329	0	76.0049	26.802	0	3.4021	1.24353	0.39755	0	0	1.01148	0.351824	0	0	0	0	0	0.398343
8	Ibaraki	24	Plastic products	23.2431	0	0	0	474.451	57.8105	0.861968	24.2205	3.65505	59.6946	4.34102	202.366	1797.6	0.244315	5.28691	0	0.122402	0	0	267.624	42.4711	0	0	1315.98	92.0183	3.54372	0.922249	0	1.55682	0	0	0	0	0.12165	14.6736	6.25475	12.1334	14.4658	126.225	16.1028	105.567	73.4342	50.753	68.4063	4.46814	413.779
8	Ibaraki	25	Rubber products	19.0414	0	0.0411939	0	17.0156	0.328582	0.29862	4.59918	0.204549	2.82927	0.195857	3.83401	20.7489	0	0.0827173	0	0.1781	0	0	2.42446	1.02394	0	0.316761	2.35481	79.8526	0	5.51677	0	2.26524	0	8.05532	0.103294	0.127062	0	0.0718882	5.51573	3.95542	46.8914	42.276	7.56603	55.53	22.8248	20.0799	4.32306	0.963163	51.4677
8	Ibaraki	26	Glass and glass products	0.148411	0	0	0	38.2931	107.243	0	0	0	48.9041	0	0	0.485159	0	1.42545	0	0	0	0	141.411	17.3622	0	0	15.1253	0.73086	17.2646	0.233586	0	2.19687	0	0	0	0	0	0	1.08013	1.81365	2.01514	0.274816	0	10.2541	0.589415	19.9926	9.54692	0.502971	5.19498
8	Ibaraki	27	Cement and cement products	0	0	0	0	0	0	0	0	0	0	0	0	0	0	0	0	0	0	0	0	0	0	0	0	0	0	174.564	0	0.106126	0	0	0	0	0	0	0	0	0	0	0	0	0	0	0	0	0
8	Ibaraki	28	Pottery, china and earthenware	0	0	0	0	0.528178	0	0	0	0	0.502984	0	0	0	0	0.0147054	0	0	0	0	0.0165776	0	0	0	0.0209317	0	0	0.0265071	0.0457553	0	0	0	0	0	0	0	0	0.0343019	0.0207887	0	0	0	0.646567	0.0430093	0.00925961	0	0.589521
8	Ibaraki	29	Other ceramic, stone and clay products	1.36543	0	0	0	5.19055	0	0	0	0	2.26552	0.392079	0	0.495958	0	11.6574	0	0	0	0	1.94138	1.15752	0	14.2041	1.8856	0.498084	5.6131	400.921	0.906795	49.234	0	5.86387	4.6319	0	0.0944916	1.03616	3.31252	12.0511	99.067	14.7489	11.7261	1.01442	11.5486	4.64931	4.50434	0.128541	7.85528
8	Ibaraki	30	Pig iron and crude steel	0	0	0	0	0	0	0	0	0	0	0	0	0	0	0.0258538	0	0	0	0	0	0	0	0	0	0	0	0	0	0	0	-34.5617	10.0246	-8.59809	0	0	-0.861987	-8.98571	-2.8691	-6.14077	-0.476776	-0.346465	-0.823157	-0.00945194	-0.0488385	-0.0501737	-0.421057
8	Ibaraki	31	steel products	0.431547	0	0	0	0	0	0	0	1.553	204.281	0	0	0	0	0	0	0	0	0	0	0	0	0	21.1859	25.325	0	57.7333	0	0.982767	0	4605.78	54.5832	2998.56	0	1.80113	338.262	1420.82	462.374	501.036	153.43	86.8048	351.489	54.4145	65.0112	9.32359	79.1482
8	Ibaraki	32	Cast and forged steel products	0	0	0	0	0	0	0	0	0	0.628087	0	0	0	0	0	0	0	0	0	0	0	0	0	0	0	0	0	0	0.0359197	0	0	0	0	0	0.0478768	7.16316	5.52553	66.2743	33.6462	35.2722	8.71828	13.113	2.6182	0.450945	0.0534547	0.736149
8	Ibaraki	33	Other iron or steel products	0	0	0	0	0	0	0	0	0	93.5228	0	0	0	0	0.0915488	0	0	0	0	0.154807	0	0	0	0.130311	0	0	1.73272	0	0.596928	0	0	1.4862	0	0	0.198909	150.479	291.332	114.214	76.7856	14.3166	21.5573	29.3564	0.334695	7.14811	3.33124	41.7855
8	Ibaraki	34	Non-ferrous metals	0	0	0	0	0	0	0	0	0	2.73706	0.0473685	0	-33.754	0	52.334	0	1.37837	0	0	148.395	0	0	0	2.84758	-0.0752192	4.56439	0	0.248984	4.33066	0	447.259	1.29906	-0.983369	83.507	590.788	-4.93577	92.5828	-6.90063	11.6246	7.08334	-2.14473	30.2096	4.62232	360.069	0.155295	14.3022
8	Ibaraki	35	Non-ferrous metal products	0	0	0	0	21.8519	1.16598	0	0	0.290337	52.8088	0	1.6326	21.319	0	0.880569	0	0	0	0	5.75755	0.384718	0	0	15.5423	10.4293	0.358767	0	0	1.49282	0	0	0	0	1.38184	155.047	86.0217	153.025	197.682	113.727	104.448	56.4174	223.357	180.409	337.23	6.15203	830.162
8	Ibaraki	36	Metal products for construction and architecture	0.155326	0	0	0	0	0	0	0	0	1.5463	0	0	0	0	0	0	0	0	0	0	0	0	0	0	0	0	0	0	0	0	0	0	0	0	0	26.0005	3.95447	0.958647	0	0.800343	0	0	0	0	0	0.339813
8	Ibaraki	37	Other metal products	3.21948	0	0.0518503	0	129.184	76.375	0	18.6223	15.9627	138.767	0.801199	8.20389	16.1116	0	5.30988	0	1.04614	0	0	108.099	10.8412	0.354553	1.79417	8.29911	55.5885	3.64806	7.31924	0	18.8046	0	0	3.64043	0.159932	0	2.71455	213.137	488.392	259.489	189.334	96.0007	158.26	82.952	60.8258	11.9973	4.34415	118.52
8	Ibaraki	38	General industrial machinery	0	0	0	0	0	0	0	0	0	1.54904	0	0	0	0	0	0	0	0	0	0	0	0	0	30.2393	0	0.100645	0.222639	0	1.8523	0	0	1.07967	1.51783	0	0.214687	0.823607	6.19432	2721.97	362.126	77.0786	99.6268	29.6813	28.0867	0.466639	1.79774	5.46728
8	Ibaraki	39	Special industrial machinery	0	0	0	0	0	0	0	0	0	0	0	0	0	0	0	0	0	0	0	0	0	0	0	0	0	0	0	0	0	0	0	0	0	0	0	0	0	6.31102	2594.44	0	0.356101	0	0.204011	1.5812	0	0
8	Ibaraki	40	Other general machines	0	0	0	0	0	0	0	0	0	2.07722	0	0	0	0	0	0	0	0	0	0.126781	0	0	0	0.352178	0	0.0183281	0	0	0.102661	0	0	0.14044	0	0	0.0390959	0.262473	0.786997	49.6358	36.2045	100.18	3.99026	4.50146	3.12479	0.283261	0.218254	2.7239
8	Ibaraki	41	Machinery for office and service industry	0	0	0	0	0	0	0	0	0	0	0	0	0	0	0	0	0	0	0	0	0	0	0	0	0	0	0	0	0	0	0	0	0	0	0	0	0	0	0	0	333.875	0	0	0	0	0
8	Ibaraki	42	Industrial electric equipment	2.30284	0	0	0	0	0	0	0	0	0.404562	0	0	0	0	0	0	0	0	0	0	0	0	0	0	0	0	0	0	0	0	0	0	0	0	0	0	0	151.993	187.248	1.57047	137.069	662.973	213.528	32.8445	4.82035	144.917
8	Ibaraki	43	Applied electric equipment and electric mesuring instruments	0	0	0	0	0	0	0	0	0	0	0	0	0	0	0	0	0	0	0	0	0	0	0	0	0	0	0	0	0	0	0	0	0	0	0	0	0	19.9033	83.4094	5.52618	14.6718	111.723	766.695	0	0	19.0943
8	Ibaraki	44	Other electric equipment	0.690146	0	0.0125043	0	0	0	0	0	0	0.515291	0	0	0	0	0	0	0	0	0	0.339664	0	0	0	0	0	0	0	0	0	0	0	0	0	0	0	0	1.05424	3.33659	9.58465	2.00031	8.39596	21.3943	12.7412	78.0079	0.730915	83.7555
8	Ibaraki	45	Household electric and electric applications	0	0	0	0	0	0	0	0	0	0	0	0	0	0	0	0	0	0	0	0	0	0	0	0	0	0	0	0	0	0	0	0	0	0	0	0	0	0	0	0	0	0	0	0	9.97783	0
8	Ibaraki	46	Communication equipment	0	0	0	0	0	0	0	0	0	0	0	0	0.0623271	0	0	0	0	0	0	0	0.0181833	0	0	0	0	0	0	0	0	0	0	0	0	0	0	0	0	0.353018	0.0661965	0	0	0.00946508	0.766868	0.00786197	0	13.2643
8	Ibaraki	47	Electric computing equipment and accessory equipment	0	0	0	0	0	0	0	0	0	0	0	0	0	0	0	0	0	0	0	0	0	0	0	0	0	0	0	0	0	0	0	0	0	0	0	0	0	0	0.820974	0	0	0	0	0	0	0.15895
8	Ibaraki	48	Semiconductor devices and integrated circuits	0	0	0	0	0	0	0	0	0	0	0	0	0	0	0	0	0	0	0	0	0	0	0	0	0	0	0	0	0	0	0	0	0	0	0	0	0.168676	0.61336	3.98718	1.08206	66.0669	41.0272	271.264	2.04249	2.45585	352.356
8	Ibaraki	49	Other electrical equipment	0	0	0	0	0	0	0	0	0	0	0	0.138423	6.70853	0	0	0	0	0	0	0	0	0	0	0	0	0	0	0	0	0	0	0	0	0	0.103818	0	0.278647	19.9272	41.8634	1.14553	169.841	119.218	1019.62	3.15921	5.73772	1332.36
8	Ibaraki	50	Passenger motor cars	0	0	0	0	0	0	0	0	0	0	0	0	0	0	0	0	0	0	0	0	0	0	0	0	0	0	0	0	0	0	0	0	0	0	0	0	0	0	0	0	0	0	0	0	0	0
8	Ibaraki	51	Other cars	0	0	0	0	0	0	0	0	0	0	0	0	0	0	0	0	0	0	0	0	0	0	0	0	0	0	0	0	0	0	0	0	0	0	0	0	0	0	0	0	0	0	0	0	0	0
8	Ibaraki	52	Motor vheicle parts and accessories	0	0	0	0	0	0	0	0	0	0	0	0	0	0	0	0	0	0	0	0	0	0	0	0	0	0	0	0	0	0	0	0	0	0	0	0	0	0	0.126408	0	0	0	0	0	0	0
8	Ibaraki	53	Other transportation equipment	1.97176	0	0	0	0	0	0	0	0	0	0	0	0	0	0	0	0	0	0	0	0	0	0	0	0	0	0	0	0	0	0	0	0	0	0	0	0	0	0	0	0	0	0	0	0	0
8	Ibaraki	54	Precision instruments	6.90917	0	0	0	0	0	0.0580779	0.0538846	0.0663036	0	0.0952294	0.186417	0.200766	0	0	0	0	0	0	0.272035	0.117143	0	0	1.03046	0	0	0	0	0	0	0	0	0	0	0.0699068	0.134093	0.187629	23.3112	64.1396	0.356008	20.0188	10.4881	17.4679	0.0506494	0.0780513	21.0274
8	Ibaraki	55	Miscellaneous manufacturing products	4.03611	0	0.0487518	0	8.84345	1.38264	0.141363	93.4709	1.23728	19.1972	0.154527	1.36123	2.93202	0	0	0	0.234196	0	0	1.91285	0	0	0.624796	0.928948	0.552112	1.96763	0.705831	0.203062	4.93617	0	0	2.03743	0.10025	0	0.907494	1.74072	1.21785	15.592	4.91328	0.770251	0	0.791575	3.34031	0.20547	0.0633264	13.463
8	Ibaraki	56	Reuse and recycling	0	0	0	0	0	24.3299	0	0	0	0	0.995753	0	0	0	0.905781	0	0	0	0	0	0	0	0	26.5227	0.121632	1.47616	1.86596	0.0805232	0.0843714	0	4.96411	21.9758	1.98768	14.1218	32.8375	0	0	0	0	0	0	0	0	0	0	0
8	Ibaraki	57	Building construction and repair of construction	0	0	0	0	0	0	0	0	0	0	0	0	0	0	0	0	0	0	0	0	0	0	0	0	0	0	0	0	0	0	0	0	0	0	0	0	0	0	0	0	0	0	0	0	0	0
8	Ibaraki	58	Public construction	0	0	0	0	0	0	0	0	0	0	0	0	0	0	0	0	0	0	0	0	0	0	0	0	0	0	0	0	0	0	0	0	0	0	0	0	0	0	0	0	0	0	0	0	0	0
8	Ibaraki	59	Other civil enginnering and construction	0	0	0	0	0	0	0	0	0	0	0	0	0	0	0	0	0	0	0	0	0	0	0	0	0	0	0	0	0	0	0	0	0	0	0	0	0	0	0	0	0	0	0	0	0	0
8	Ibaraki	60	Electricity	20.5308	0	1.14151	0	726.763	50.4637	9.04068	30.3432	14.8895	42.5158	20.1702	52.3284	502.853	0.196037	22.9899	0	8.54463	0.0690596	0	154.421	13.2528	14.4463	9.17067	155.926	95.8952	10.8441	49.2104	0.681259	19.0054	0	254.615	49.2153	27.8524	22.6946	12.6065	41.747	155.213	127.583	131.391	60.8688	35.105	59.6492	27.9163	14.5623	9.95889	104.69
8	Ibaraki	61	Gas supply and heat supply	0	0	0	0	0	0	0	0	0	0	0	0	0	0	0	0	0	0	0	0	0	0	0	0	0	0	0	0	0	0	0	0	0	0	0	0	0	0	0	0	0	0	0	0	0	0
8	Ibaraki	62	Water supply and waste management services	0.417709	0	0.00672728	0	57.9354	6.56441	0.907066	0.425312	0.267235	1.1551	0.751646	2.31665	10.3171	0	0.74296	0	0.494447	0.0136342	0	13.2638	3.95418	0.172505	0.155189	2.92264	1.51103	0.34673	8.98496	0.0252185	1.42688	0	5.70048	0.168688	0.269753	0.356514	0.293498	1.53129	2.83588	9.14726	7.60586	2.33168	2.8964	2.48839	1.70874	0.467824	0.367014	3.74562
8	Ibaraki	63	Commerce	9.7089	0	0.0248697	0	244.243	11.3493	0.978996	15.8711	2.70183	16.2769	2.68018	32.2371	126.187	0.0173428	1.68882	0	0.725509	0.0336024	0	38.4725	6.20597	0.164906	1.59943	19.6489	10.9359	0.992646	17.4904	0.0527355	1.98526	0	19.801	1.71588	13.5615	0.416658	2.03062	8.86479	17.5365	31.9056	38.607	10.4215	24.316	16.8359	35.1642	7.522	0.948582	59.5409
8	Ibaraki	64	Financial and insurance	0	0	0	0	0	0	0	0	0	0	0	0	0	0	0	0	0	0	0	0	0	0	0	0	0	0	0	0	0	0	0	0	0	0	0	0	0	0	0	0	0	0	0	0	0	0
8	Ibaraki	65	Real estate agencies and rental services	0	0	0	0	0	0	0	0	0	0	0	0	0	0	0	0	0	0	0	0	0	0	0	0	0	0	0	0	0	0	0	0	0	0	0	0	0	0	0	0	0	0	0	0	0	0
8	Ibaraki	66	House rent	0	0	0	0	0	0	0	0	0	0	0	0	0	0	0	0	0	0	0	0	0	0	0	0	0	0	0	0	0	0	0	0	0	0	0	0	0	0	0	0	0	0	0	0	0	0
8	Ibaraki	67	Transport	116.448	0	3.13751	0	372.577	37.4779	3.16025	23.0301	15.7433	33.2686	4.19255	52.4397	385.8	0	6.28685	0	1.31365	0	0	89.8318	23.0051	3.34236	1.37137	44.5927	15.8087	5.40385	367.56	0.165075	61.8863	0	105.758	3.71008	18.1328	2.6301	6.20153	42.5851	67.5074	91.4262	71.7258	41.9135	44.317	34.0851	78.5343	8.68569	1.31274	167.645
8	Ibaraki	68	Communication	0	0	0	0	0	0	0	0	0	0	0	0	0	0	0	0	0	0	0	0	0	0	0	0	0	0	0	0	0	0	0	0	0	0	0	0	0	0	0	0	0	0	0	0	0	0
8	Ibaraki	69	Broadcasting	0	0	0	0	0	0	0	0	0	0	0	0	0	0	0	0	0	0	0	0	0	0	0	0	0	0	0	0	0	0	0	0	0	0	0	0	0	0	0	0	0	0	0	0	0	0
8	Ibaraki	70	Information services	0	0	0	0	0	0	0	0	0	0	0	0	0	0	0	0	0	0	0	0	0	0	0	0	0	0	0	0	0	0	0	0	0	0	0	0	0	0	0	0	0	0	0	0	0	0
8	Ibaraki	71	﻿Internet based services	0	0	0	0	0	0	0	0	0	0	0	0	0	0	0	0	0	0	0	0	0	0	0	0	0	0	0	0	0	0	0	0	0	0	0	0	0	0	0	0	0	0	0	0	0	0
8	Ibaraki	72	Image information production and distribution industry	0	0	0	0	0	0	0	0	0	0	0	0	0	0	0	0	0	0	0	0	0	0	0	0	0	0	0	0	0	0	0	0	0	0	0	0	0	0	0	0	0	0	0	0	0	0
8	Ibaraki	73	Public administration	0	0	0	0	0	0	0	0	0	0	0	0	0	0	0	0	0	0	0	0	0	0	0	0	0	0	0	0	0	0	0	0	0	0	0	0	0	0	0	0	0	0	0	0	0	0
8	Ibaraki	74	Education and Research	2.61964	0	0.0876249	0	179.208	16.708	1.63338	11.2648	0.559417	41.8983	0.684437	31.9227	12.0769	0.288066	24.0801	0	7.21605	0.30444	0	566.267	436.067	0.213993	2.55079	302.758	162.911	35.7103	70.6359	0.797734	9.7189	0	60.8246	3.67247	0.115833	14.2001	14.0464	27.7394	25.1824	252.861	465.305	37.8616	389.936	464.192	795.053	157.878	10.9512	1146.43
8	Ibaraki	75	Medical service, health and social security and nursing care	1.34634	0	0.0462191	0	18.1823	3.44088	0.13402	5.67833	0.204002	2.75116	0.366249	6.30919	7.64419	0	0.680591	0	0.0888118	0	0	12.6944	9.0556	0.0526746	0.47387	9.9518	8.02593	0.554581	13.6063	0.0385025	0.16137	0	3.46913	0.618108	2.09092	0.1324	0.161316	1.95972	6.20589	23.0914	15.2206	14.5135	19.4256	5.34698	5.97165	0.623348	0.120073	23.2535
8	Ibaraki	76	Advertising and survery	1.95639	0	0.00547337	0	9.78929	3.92716	0.0204054	0.24191	0.0452968	2.55805	0.502806	5.509	1.04044	0.00224921	0.120896	0	0.00676111	0	0	36.7623	3.21715	0.00401004	0	3.68304	2.05291	0.0614101	0.266033	0.00977047	0.118754	0	0.667199	0.0862686	0.0506477	0.0067196	0.0409358	0.374285	0.512732	1.71574	1.53997	1.33884	1.50089	1.37947	2.53711	0.40633	0.103598	4.98688
8	Ibaraki	77	Giids rental and leasing services	1.67181	0	0.0195112	0	14.413	0.710905	0.226303	0.764033	0.224864	3.38159	0.211301	4.55332	22.7734	0	0.423707	0	0.0354086	0	0	2.614	0.390942	0.0716503	1.06133	7.93129	3.11531	0.396101	6.47621	0.0234775	0.503343	0	2.26951	0.442133	0.735558	0.086943	0.408592	1.79971	6.13991	21.1369	16.2418	9.10241	7.32631	15.5254	12.0995	2.2422	0.177409	28.8456
8	Ibaraki	78	Other business services	0.000979287	0	1.49791e-05	0	0.0139483	0.0006524	0.000133405	0.00160809	0.000242026	0.00313209	0.000146676	0.00547032	0.0493155	2.05182e-06	0.000501299	0	3.90624e-05	2.89125e-06	0	0.00398815	0.00205666	7.31623e-05	0.000230364	0.00889291	0.00491679	0.000882326	0.0076575	8.02171e-06	0.000466014	0	0.00144553	0.000674296	0.000211213	0.000318754	0.000301235	0.00185523	0.00330922	0.00951857	0.00730963	0.0025589	0.00482042	0.0055939	0.0123839	0.00156385	0.00020847	0.0106093
8	Ibaraki	79	Personal services	9.14068	0	0	0	3.96948	0.139975	0	0.655047	0.065353	0.602631	0	0.979966	7.35482	0	0.052856	0	0	0	0	1.34067	0.404121	0	0	1.57995	0.546524	0.0538373	1.14331	0	0.0172319	0	0.701907	0.0660047	0.243577	0	0.0459363	0.308396	0.863047	1.5318	1.26104	0.584838	0.876968	1.88322	1.19807	0.382744	0	2.47209
8	Ibaraki	80	Activities not elsewhere classified	10.0449	0	0.0279054	0	42.7363	2.69448	0.259783	5.70956	5.76138	2.19231	1.34772	27.7219	68.5741	0	0.471866	0	0.211663	0.00595327	0	2.18096	2.95061	0.0903874	0.948666	10.0497	3.45967	0.463804	48.5245	0.0917622	1.60759	0	7.36277	2.49694	7.18492	0.639505	0.635641	1.6224	9.89922	34.5125	19.1882	8.03175	10.6068	4.52947	6.84004	3.3092	0.160254	10.6159
9	Tochigi	1	Agriculture, forestry and fishery	55.703	0	0	0	1630.38	45.2232	4.20792	0.17224	47.4032	0	0.177565	0.0993122	0	0	0.257115	0	0.153777	0	0	2.41541	3.33877	0	1.39486	0	275.923	0	0	0	0.810295	0	0	0	0	0	0.0372424	0	0	0	0	0	0	0	0	0	0	0
9	Tochigi	2	Metallic ores	0	0	0	0	0	0	0	0	0	0	0	0	0	0	0	0	0	0	0	0	0	0	0	0	0	0	0	0	0	0	0	0	0	0	0	0	0	0	0	0	0	0	0	0	0	0
9	Tochigi	3	Non-metallic ores	0	0	1.10627	0	0	0	0	0	0	0	2.91419	0	0	0	9.84612	0	0.172357	0	0	2.8426	0.699469	-2.14673	1.14955	0	3.83753	275.917	93.9351	2.68998	46.6624	0	0	1.79934	0	0.171298	0.104355	0.800678	1.54048	0	0	5.31438	0	0	0	0	0	0
9	Tochigi	4	Coal mining, crude petroleum and natural gas	0	0	0	0	0	0	0	0	0	0	0	0	0	0	0	0	0	0	0	0	0	0	0	0	0	0	0	0	0	0	0	0	0	0	0	0	0	0	0	0	0	0	0	0	0	0
9	Tochigi	5	Food and Tobacco	31.6502	0	0	0	7206.26	199.859	0	6.2385	0.0498463	0	0.286369	0	0	0	0.0604718	0	0.043401	0	0	32.1767	6.95725	0	0	0.0860761	0	0	0	0	0.236578	0	0	0	0	0	0	0	0	0	0	0	0	0	0	0	0	0
9	Tochigi	6	Beverage	3.64052	0	0	0	12.3254	55.4692	0	0	0	0	0	0	0	0	0	0	0.0407395	0	0	0	0.041333	0	0	0	0	0	0	0	0	0	0	0	0	0	0	0	0	0	0	0	0	0	0	0	0	0
9	Tochigi	7	Textile products	0.642459	0	0	0	0	0.0121769	5.78336	86.2715	0	1.42595	0.10343	0.660689	1.13618	0	0	0	0	0	0	0.010367	0	0	0	0.392698	5.99051	0.0262274	0	0	0.155902	0	0	0	0	0	0.0319691	0.0153305	0.0858046	0.0520021	1.09214	0	0	0	0	0.00579062	0.0981576	0.153611
9	Tochigi	8	Wearing aparel and other textile products	6.7248	0	0.0208447	0	18.1575	0.427545	1.66649	8.32364	0.463306	1.39075	0.14866	3.40897	2.59683	0	0.10763	0	0.0343319	0	0	2.10311	0.400568	0	0.801429	0.493649	1.05667	0.277725	1.20716	0	0.623807	0	1.34106	0.134404	0.422512	0.0170606	0.197472	0.458528	1.68767	2.55282	1.49632	2.04658	1.41945	4.43312	2.44836	0.34639	0.104437	6.49212
9	Tochigi	9	Timber and wooden products	1.01957	0	0	0	4.92183	0.214327	0	0.352403	40.1435	80.5085	9.68926	31.276	0.4545	0	0	0	0	0	0	0.478988	0	0	0	0.518395	0.0190187	0.816099	0.0364709	0.100727	0.408969	0	0	0.353726	0	0	0.773702	0.944418	2.05301	0.457648	0.536352	0.179098	2.27242	0.475478	0.532585	0.140142	0.0196328	0.608337
9	Tochigi	10	Furniture and fixtures	0.0801395	0	0	0	6.68309	0.231636	0.0757852	1.33595	0.0576792	44.6372	0.0828424	2.02711	3.58036	0	0.104962	0	0.100442	0	0	2.80036	0.407622	0	0	2.19125	0.624864	0.0712736	0.693728	0.0217724	0.410631	0	0.825985	0.174763	0	0	0.0912206	0.116651	0.571281	0.741914	1.63235	0.567783	0.625149	0.981344	1.53493	0.176245	0.101848	9.43832
9	Tochigi	11	Pulp, paper, paperboard, building paper	0.0130979	0	0	0	0.728184	0.0151434	0.107347	0.0306452	0.216822	1.64294	19.4836	59.7945	58.0745	0	0.182985	0	0	0.0230862	0	1.77918	0.0166553	0	0	0.537203	0.150503	0.0745528	0	0	0.238624	0	0.0674991	0	0.0527032	0	0.029818	0	0.0133385	0.0161677	0	0.050617	0	1.10105	0.0167245	0.0144026	0.0110973	0.477582
9	Tochigi	12	Paper products	13.5248	0	0	0	451.88	41.7763	0.721158	5.35271	0.145288	20.0289	0	16.2032	20.9699	0.0841663	1.1163	0	0.168669	0	0	278.576	12.7489	0	0	7.61025	2.04339	5.40985	3.17714	0.475299	0.804484	0	0	0	0.270751	0	0.0510611	0	6.64679	2.15951	0.186896	1.90691	2.32453	3.25133	3.35081	1.10986	0.51309	11.5804
9	Tochigi	13	Publishing, printing	0.0945562	0	0.00228427	0	66.8269	1.38475	0.0596123	2.96821	0.0680554	1.95587	0.0054303	22.2382	894.174	0	0.174299	0	0	0	0	22.4929	0.414152	0.00780994	0.0175649	0.195867	0.319054	0.627911	0.132287	0	0.107667	0	0.379002	0.148924	0.0281832	0.00654354	0.103644	0.214099	2.37523	2.06201	1.83846	0.839097	6.36921	0.820601	2.1196	0.0808696	0.302651	11.8986
9	Tochigi	14	Chemical fertilizer	10.0544	0	0	0	0	0.0538172	0	0	0	0	0	0	0	0.698691	2.39798	0	0.379214	0.0410224	0	4.16947	1.2134	0	0	0	0	0	0	0	0.0265011	0	2.75864	0	0	0	0	0	0	0	0	0	0	0	0	0.0255924	0	0
9	Tochigi	15	Basic inorganic chemical products	0	0	0	0	1.63269	0.0490441	0.0811209	0.000827075	0	0.00703826	0.0211943	0.0572262	0.00616312	0.0141494	1.25562	0	0.144435	0.00249227	0	5.69534	0.861254	0	0	0.312815	1.09903	0.27465	0.0445098	0	0.00402511	0	0.433569	0.0046253	0.00189652	0.00176133	0.002146	0.0473383	0.0388789	0.0296715	0.0301104	0.040072	0.0173331	0.0439892	0.088469	0.0380935	0	0.114457
9	Tochigi	16	Basic organic chemical products	0	0	0	0	0	0	0	0	0	0	0	0	0	0	0	0	0	0	0	0	0	0	0	0	0	0	0	0	0	0	0	0	0	0	0	0	0	0	0	0	0	0	0	0	0	0
9	Tochigi	17	Organic chemical products	0.157566	0	0	0	1.47946	0.262328	0.466218	0.00245771	0.0136087	0.0125488	0.0608085	0.0255077	0.173984	0	0.220128	0	2.43037	0.157376	0	19.7282	4.15281	0	0.00702472	2.75209	3.56932	0.0321374	0	0	0.0119609	0	0	0	0	0.00130848	0.0239137	0.00305802	0.0213947	0.0959506	0.00194511	0.0243566	0.346498	0.0472805	0.0107303	0.00577537	0.0355997	0.0383015
9	Tochigi	18	Synthetic resins	0	0	0	0	0	0	0.0269809	0	0	0.119294	0.13272	0.34641	0.074615	0	0	0	0	0	0	23.8264	0	0	0	33.9035	0	0	0	0	0.0341115	0	0	0	0	0	0.0194857	0	0	0	0	0.0330777	0.114462	1.05379	0	0.0423538	0.0435118	0.948767
9	Tochigi	19	Synthetic fibers	0	0	0	0	0	0	1.12688	3.77008	0	0.0793799	0.0103033	0	0	0	0	0	0	0	0	0	0	0	0.0222182	0.107361	0.021815	0	0	0	0	0	0	0	0	0	0	0	0	0	0	0	0	0	0	0	0	0
9	Tochigi	20	Final chemical products	2.99954	0	0.107071	0	21.4434	1.1905	1.77814	2.46154	4.38219	9.89425	2.79989	46.0218	795.078	0	8.05268	0	1.48695	0	0	390.747	25.931	0.332798	2.61967	15.1903	5.36473	0.318531	2.18435	0	3.49191	0	1.03822	0.39052	0.120095	0	0.44165	1.04265	6.65638	2.76309	2.5699	1.96079	20.4552	3.40785	2.88683	1.55071	0.0758622	8.12933
9	Tochigi	21	Medicaments	85.7114	0	0	0	4.95339	0	0	0.0677496	0	0	0	0	0	0	0	0	0	0	0	23.2582	139.258	0	0	0	0	0	0	0	0	0	0	0	0	0	0	0	0	0	0	0	0	0	0	0	0	0
9	Tochigi	22	Petroleum refinery products	0.0305631	0	2.8337e-05	0	0.0772898	0.000678089	0.00250611	0.000419292	0.000234513	0.00129749	0.000875737	0.00250552	0.077614	8.1513e-05	0.00642977	0	0.00343039	0	0	0.0173192	0.000621493	0.00639438	0.0245135	0.000890921	0.00229989	0.00625936	0.00297442	0.000283271	0.00304229	0	0.0186386	0.000426333	0	0.000284111	0.000741772	0.00208683	0.00683544	0.00313714	0.00108603	0.000755509	0.000290485	0.0011215	0.000998517	0.00193476	0	0.00142568
9	Tochigi	23	Coal products	0	0	0	0	0	0	0	0	0	0	0.0191528	0	0	0	0.0754965	0	0.0928874	0	0	0.0121584	0	0	0	0	0	0	0	0	0.260196	0	3.43736	1.21214	0	0.153862	0.0562395	0.0179794	0	0	0.0457446	0.0159114	0	0	0	0	0	0.0180153
9	Tochigi	24	Plastic products	14.8465	0	0	0	303.055	36.9264	0.550582	15.4708	2.33466	38.1299	2.77282	129.261	1148.22	0.156056	3.37701	0	0.0781839	0	0	170.945	27.1284	0	0	840.58	58.7766	2.26355	0.589086	0	0.994416	0	0	0	0	0.0777039	9.37276	3.99521	7.75019	9.24005	80.6263	10.2856	67.4308	46.906	32.4184	43.6945	2.85402	264.301
9	Tochigi	25	Rubber products	25.6827	0	0.0555617	0	22.9504	0.443187	0.402774	6.20331	0.275892	3.81607	0.264169	5.17125	27.9858	0	0.111568	0	0.240219	0	0	3.27007	1.38107	0	0.427242	3.17613	107.704	0	7.44093	0	3.05532	0	10.8649	0.139322	0.171379	0	0.0969617	7.43953	5.335	63.2463	57.0212	10.2049	74.898	30.7857	27.0834	5.83087	1.2991	69.4188
9	Tochigi	26	Glass and glass products	0.0241645	0	0	0	6.23493	17.4614	0	0	0	7.96263	0	0	0.0789942	0	0.232094	0	0	0	0	23.0246	2.82694	0	0	2.46272	0.118999	2.81105	0.0380328	0	0.357696	0	0	0	0	0	0	0.175869	0.295301	0.328108	0.0447458	0	1.66959	0.0959693	3.25522	1.55444	0.0818943	0.845853
9	Tochigi	27	Cement and cement products	0	0	0	0	0	0	0	0	0	0	0	0	0	0	0	0	0	0	0	0	0	0	0	0	0	0	66.719	0	0.0405616	0	0	0	0	0	0	0	0	0	0	0	0	0	0	0	0	0
9	Tochigi	28	Pottery, china and earthenware	0	0	0	0	0.338872	0	0	0	0	0.322708	0	0	0	0	0.00943477	0	0	0	0	0.010636	0	0	0	0.0134295	0	0	0.0170066	0.029356	0	0	0	0	0	0	0	0	0.0220076	0.0133378	0	0	0	0.414829	0.0275942	0.00594084	0	0.378229
9	Tochigi	29	Other ceramic, stone and clay products	0.304242	0	0	0	1.15654	0	0	0	0	0.504798	0.0873619	0	0.110508	0	2.59748	0	0	0	0	0.432572	0.257916	0	3.16492	0.420144	0.110982	1.25069	89.3319	0.202049	10.9702	0	1.30657	1.03207	0	0.0210543	0.230873	0.738086	2.68519	22.0738	3.28631	2.61277	0.22603	2.57322	1.03595	1.00364	0.0286412	1.75029
9	Tochigi	30	Pig iron and crude steel	0	0	0	0	0	0	0	0	0	0	0	0	0	0	0.0751881	0	0	0	0	0	0	0	0	0	0	0	0	0	0	0	-100.513	29.1535	-25.005	0	0	-2.50684	-26.1323	-8.34395	-17.8586	-1.38656	-1.00759	-2.39391	-0.0274882	-0.142032	-0.145916	-1.22452
9	Tochigi	31	steel products	0.0268764	0	0	0	0	0	0	0	0.0967194	12.7225	0	0	0	0	0	0	0	0	0	0	0	0	0	1.31944	1.57722	0	3.59559	0	0.061206	0	286.845	3.3994	186.748	0	0.112173	21.0667	88.4875	28.7963	31.2042	9.5555	5.40614	21.8905	3.38889	4.04885	0.580666	4.92929
9	Tochigi	32	Cast and forged steel products	0	0	0	0	0	0	0	0	0	0.276399	0	0	0	0	0	0	0	0	0	0	0	0	0	0	0	0	0	0	0.015807	0	0	0	0	0	0.0210689	3.15225	2.43159	29.165	14.8065	15.5221	3.8366	5.77057	1.15218	0.198445	0.0235235	0.323953
9	Tochigi	33	Other iron or steel products	0	0	0	0	0	0	0	0	0	92.327	0	0	0	0	0.0903782	0	0	0	0	0.152827	0	0	0	0.128645	0	0	1.71057	0	0.589296	0	0	1.46719	0	0	0.196366	148.555	287.607	112.754	75.8038	14.1335	21.2817	28.981	0.330416	7.05671	3.28865	41.2512
9	Tochigi	34	Non-ferrous metals	0	0	0	0	0	0	0	0	0	1.5287	0.0264562	0	-18.8523	0	29.2296	0	0.769844	0	0	82.8813	0	0	0	1.59043	-0.0420114	2.5493	0	0.139063	2.41876	0	249.803	0.725552	-0.549231	46.6403	329.967	-2.75673	51.7093	-3.85414	6.49257	3.95618	-1.19787	16.8727	2.58166	201.106	0.0867356	7.98806
9	Tochigi	35	Non-ferrous metal products	0	0	0	0	11.5833	0.618065	0	0	0.153903	27.993	0	0.865414	11.3009	0	0.466775	0	0	0	0	3.05198	0.203932	0	0	8.2387	5.52841	0.190176	0	0	0.791317	0	0	0	0	0.732491	82.188	45.5986	81.1159	104.788	60.2845	55.3661	29.9059	118.398	95.6318	178.76	3.26109	440.055
9	Tochigi	36	Metal products for construction and architecture	0.0965302	0	0	0	0	0	0	0	0	0.960977	0	0	0	0	0	0	0	0	0	0	0	0	0	0	0	0	0	0	0	0	0	0	0	0	0	16.1585	2.45758	0.59577	0	0.497389	0	0	0	0	0	0.211183
9	Tochigi	37	Other metal products	1.79338	0	0.0288828	0	71.9611	42.5441	0	10.3734	8.89191	77.299	0.446302	4.56992	8.97484	0	2.95783	0	0.582743	0	0	60.2155	6.03901	0.197501	0.999426	4.62296	30.9651	2.03212	4.07713	0	10.4749	0	0	2.02787	0.0890887	0	1.51212	118.727	272.055	144.546	105.467	53.4765	88.1577	46.2078	33.8826	6.68298	2.41988	66.0208
9	Tochigi	38	General industrial machinery	0	0	0	0	0	0	0	0	0	0.269622	0	0	0	0	0	0	0	0	0	0	0	0	0	5.26337	0	0.017518	0.0387519	0	0.322406	0	0	0.187925	0.26419	0	0.0373678	0.143355	1.07817	473.78	63.0307	13.4161	17.3408	5.16625	4.8887	0.0812221	0.31291	0.951622
9	Tochigi	39	Special industrial machinery	0	0	0	0	0	0	0	0	0	0	0	0	0	0	0	0	0	0	0	0	0	0	0	0	0	0	0	0	0	0	0	0	0	0	0	0	0	2.23414	918.451	0	0.126062	0	0.0722214	0.559755	0	0
9	Tochigi	40	Other general machines	0	0	0	0	0	0	0	0	0	2.22584	0	0	0	0	0	0	0	0	0	0.135853	0	0	0	0.377377	0	0.0196395	0	0	0.110007	0	0	0.150488	0	0	0.0418933	0.281253	0.843308	53.1873	38.795	107.349	4.27576	4.82355	3.34837	0.303529	0.23387	2.91879
9	Tochigi	41	Machinery for office and service industry	0	0	0	0	0	0	0	0	0	0	0	0	0	0	0	0	0	0	0	0	0	0	0	0	0	0	0	0	0	0	0	0	0	0	0	0	0	0	0	0	94.1143	0	0	0	0	0
9	Tochigi	42	Industrial electric equipment	0.528353	0	0	0	0	0	0	0	0	0.0928211	0	0	0	0	0	0	0	0	0	0	0	0	0	0	0	0	0	0	0	0	0	0	0	0	0	0	0	34.8726	42.9615	0.360322	31.4485	152.11	48.991	7.5357	1.10596	33.2492
9	Tochigi	43	Applied electric equipment and electric mesuring instruments	0	0	0	0	0	0	0	0	0	0	0	0	0	0	0	0	0	0	0	0	0	0	0	0	0	0	0	0	0	0	0	0	0	0	0	0	0	16.2727	68.1946	4.51814	11.9955	91.3434	626.841	0	0	15.6112
9	Tochigi	44	Other electric equipment	1.14466	0	0.0207393	0	0	0	0	0	0	0.854645	0	0	0	0	0	0	0	0	0	0.563357	0	0	0	0	0	0	0	0	0	0	0	0	0	0	0	0	1.74852	5.53397	15.8968	3.31765	13.9253	35.484	21.1321	129.382	1.21227	138.914
9	Tochigi	45	Household electric and electric applications	0	0	0	0	0	0	0	0	0	0	0	0	0	0	0	0	0	0	0	0	0	0	0	0	0	0	0	0	0	0	0	0	0	0	0	0	0	0	0	0	0	0	0	0	9.8418	0
9	Tochigi	46	Communication equipment	0	0	0	0	0	0	0	0	0	0	0	0	0.878874	0	0	0	0	0	0	0	0.256402	0	0	0	0	0	0	0	0	0	0	0	0	0	0	0	0	4.97791	0.933437	0	0	0.133467	10.8136	0.110862	0	187.04
9	Tochigi	47	Electric computing equipment and accessory equipment	0	0	0	0	0	0	0	0	0	0	0	0	0	0	0	0	0	0	0	0	0	0	0	0	0	0	0	0	0	0	0	0	0	0	0	0	0	0	0.750832	0	0	0	0	0	0	0.14537
9	Tochigi	48	Semiconductor devices and integrated circuits	0	0	0	0	0	0	0	0	0	0	0	0	0	0	0	0	0	0	0	0	0	0	0	0	0	0	0	0	0	0	0	0	0	0	0	0	0.226829	0.824822	5.3618	1.45511	88.8441	55.1717	364.785	2.74666	3.30253	473.834
9	Tochigi	49	Other electrical equipment	0	0	0	0	0	0	0	0	0	0	0	0.101595	4.92368	0	0	0	0	0	0	0	0	0	0	0	0	0	0	0	0	0	0	0	0	0	0.0761967	0	0.204511	14.6254	30.7254	0.840752	124.654	87.4994	748.346	2.31868	4.21116	977.878
9	Tochigi	50	Passenger motor cars	0	0	0	0	0	0	0	0	0	0	0	0	0	0	0	0	0	0	0	0	0	0	0	0	0	0	0	0	0	0	0	0	0	0	0	0	0	0	0	0	0	0	0	0	0	0
9	Tochigi	51	Other cars	0	0	0	0	0	0	0	0	0	0	0	0	0	0	0	0	0	0	0	0	0	0	0	0	0	0	0	0	0	0	0	0	0	0	0	0	0	0	0	0	0	0	0	0	0	0
9	Tochigi	52	Motor vheicle parts and accessories	0	0	0	0	0	0	0	0	0	0	0	0	0	0	0	0	0	0	0	0	0	0	0	0	0	0	0	0	0	0	0	0	0	0	0	0	0	0	0.300412	0	0	0	0	0	0	0
9	Tochigi	53	Other transportation equipment	13.0171	0	0	0	0	0	0	0	0	0	0	0	0	0	0	0	0	0	0	0	0	0	0	0	0	0	0	0	0	0	0	0	0	0	0	0	0	0	0	0	0	0	0	0	0	0
9	Tochigi	54	Precision instruments	6.1341	0	0	0	0	0	0.0515627	0.0478398	0.0588657	0	0.0845465	0.165504	0.178244	0	0	0	0	0	0	0.241518	0.104002	0	0	0.91486	0	0	0	0	0	0	0	0	0	0	0.0620647	0.11905	0.166581	20.6961	56.9445	0.316071	17.7731	9.31153	15.5084	0.0449676	0.0692955	18.6685
9	Tochigi	55	Miscellaneous manufacturing products	1.76986	0	0.0213779	0	3.8779	0.606295	0.0619886	40.9875	0.542556	8.4181	0.0677611	0.596907	1.28571	0	0	0	0.102696	0	0	0.838797	0	0	0.273976	0.407349	0.242104	0.862815	0.309511	0.0890436	2.16454	0	0	0.893424	0.04396	0	0.397941	0.763316	0.534035	6.83717	2.1545	0.337759	0	0.34711	1.46475	0.0900999	0.027769	5.9036
9	Tochigi	56	Reuse and recycling	0	0	0	0	0	8.34333	0	0	0	0	0.341468	0	0	0	0.310615	0	0	0	0	0	0	0	0	9.09528	0.0417106	0.50621	0.639884	0.0276134	0.028933	0	1.70232	7.53604	0.681623	4.8427	11.2608	0	0	0	0	0	0	0	0	0	0	0
9	Tochigi	57	Building construction and repair of construction	0	0	0	0	0	0	0	0	0	0	0	0	0	0	0	0	0	0	0	0	0	0	0	0	0	0	0	0	0	0	0	0	0	0	0	0	0	0	0	0	0	0	0	0	0	0
9	Tochigi	58	Public construction	0	0	0	0	0	0	0	0	0	0	0	0	0	0	0	0	0	0	0	0	0	0	0	0	0	0	0	0	0	0	0	0	0	0	0	0	0	0	0	0	0	0	0	0	0	0
9	Tochigi	59	Other civil enginnering and construction	0	0	0	0	0	0	0	0	0	0	0	0	0	0	0	0	0	0	0	0	0	0	0	0	0	0	0	0	0	0	0	0	0	0	0	0	0	0	0	0	0	0	0	0	0	0
9	Tochigi	60	Electricity	0.0248025	0	0.00137902	0	0.877977	0.0609635	0.0109217	0.0366566	0.0179875	0.0513619	0.0243669	0.0632162	0.60748	0.000236825	0.0277733	0	0.0103225	8.34286e-05	0	0.186551	0.0160102	0.017452	0.0110788	0.188368	0.115848	0.0131004	0.0594494	0.000823006	0.0229597	0	0.307592	0.0594553	0.0336476	0.0274166	0.0152295	0.0504331	0.187508	0.154129	0.158729	0.0735335	0.0424092	0.0720601	0.0337247	0.0175922	0.012031	0.126472
9	Tochigi	61	Gas supply and heat supply	0.000417461	0	0	0	0.799815	0.0789138	0.00763238	0.00463947	0.000600922	0.00955858	0.0021577	0.0426606	0.0136468	0	0.0040096	0	0.00261611	0	0	0.0702669	0.0253477	0	0.0010469	0.0850906	0.0202154	0.0290338	0.0118268	0.00124758	0.0029709	0	0.215673	0.0147935	0.000839885	0.00221004	0.00522702	0.020964	0.0739724	0.0319487	0.0214512	0.00994856	0.0158173	0.0252836	0.00932832	0.0168699	0.000707393	0.0694106
9	Tochigi	62	Water supply and waste management services	1.81645	0	0.0292543	0	251.938	28.546	3.94447	1.84951	1.1621	5.02309	3.26861	10.0742	44.8649	0	3.23084	0	2.15015	0.0592898	0	57.6789	17.1952	0.750155	0.674854	12.7094	6.57085	1.50779	39.072	0.109665	6.20494	0	24.7891	0.733555	1.17305	1.55034	1.2763	6.65899	12.3321	39.7778	33.0749	10.1395	12.5953	10.821	7.43063	2.03438	1.596	16.2882
9	Tochigi	63	Commerce	32.1501	0	0.0823536	0	808.786	37.5822	3.24185	52.5556	8.94684	53.8995	8.87516	106.75	417.857	0.057429	5.59237	0	2.40245	0.111271	0	127.398	20.5505	0.546071	5.29635	65.0655	36.2132	3.28705	57.9178	0.174629	6.57399	0	65.5692	5.68196	44.9074	1.37972	6.7242	29.3549	58.0705	105.652	127.843	34.5098	80.5199	55.7505	116.443	24.9084	3.14114	197.164
9	Tochigi	64	Financial and insurance	0.502553	0	0.00295312	0	1.7866	0.185232	0.082711	0.971787	0.0564331	0.65027	0.0692458	1.14501	2.88071	0.000386128	0.0501342	0	0.00986593	0.00027205	0	0.419016	0.0993114	0.0243239	0.0061931	0.354889	0.34204	0.076213	1.49741	0.0046965	0.0973644	0	0.42157	0.0481324	0.186732	0.0895941	0.0281102	0.266454	0.312164	0.94308	0.684792	0.717361	0.271077	0.412745	0.320259	0.0448066	0.015431	0.707084
9	Tochigi	65	Real estate agencies and rental services	0	0	0	0	0	0	0	0	0	0	0	0	0	0	0	0	0	0	0	0	0	0	0	0	0	0	0	0	0	0	0	0	0	0	0	0	0	0	0	0	0	0	0	0	0	0
9	Tochigi	66	House rent	0	0	0	0	0	0	0	0	0	0	0	0	0	0	0	0	0	0	0	0	0	0	0	0	0	0	0	0	0	0	0	0	0	0	0	0	0	0	0	0	0	0	0	0	0	0
9	Tochigi	67	Transport	37.4019	0	1.00774	0	119.668	12.0376	1.01504	7.39706	5.05661	10.6856	1.34661	16.8431	123.915	0	2.01928	0	0.421933	0	0	28.8532	7.38902	1.07354	0.440471	14.3228	5.07761	1.73567	118.057	0.0530204	19.8773	0	33.9684	1.19164	5.82408	0.844763	1.99187	13.6779	21.6827	29.3653	23.0377	13.4622	14.2342	10.9478	25.2245	2.78976	0.421638	53.846
9	Tochigi	68	Communication	0.777041	0	0.00514351	0	0.889785	0.0547028	0.0252398	0.536471	0.005239	0.711965	0.0291577	0.79909	4.92961	0	0.0413126	0	0.00570198	0	0	0.856215	2.22377	0.0689901	0.0730174	0.848144	0.867776	0.0615009	0.146072	0	0.0497302	0	0.314164	0.0932583	0.0219671	0.0940718	0.0897603	0.662211	0.700508	2.45068	1.12379	0.73607	0.697612	0.96965	0.902728	0.119062	0.0185018	1.43057
9	Tochigi	69	Broadcasting	0	0	0	0	0	0	0	0	0	0	0	0	0	0	0	0	0	0	0	0	0	0	0	0	0	0	0	0	0	0	0	0	0	0	0	0	0	0	0	0	0	0	0	0	0	0
9	Tochigi	70	Information services	1.29069	0	0.00692893	0	5.06996	0.663221	0.0462105	0.294525	0.0894547	2.37945	0.0856536	2.31516	8.46286	0	0.0695663	0	0.0339512	0	0	1.79119	2.60369	0.00236901	0.0692641	2.91519	1.07765	0.214274	1.25898	0.0103898	0.148779	0	1.10036	0.194593	0.504384	0.119092	0.178959	0.644794	2.20689	4.71269	5.78022	2.05673	2.4576	5.08166	10.2871	1.84679	0.0270011	10.9322
9	Tochigi	71	﻿Internet based services	0.01479	0	0	0	0.0685213	0.0128248	0.0017483	0.0275751	0.00332652	0.0708579	0.0019111	0.0579868	0.254838	0	0.00242138	0	0	0	0	0.0218373	0.168087	0.000687144	0.00154542	0.124078	0.0182085	0.0052615	0.0378269	0	0.00368391	0	0.0166729	0.00806327	0.00123983	0.00115145	0.00771605	0.0470929	0.061188	0.122089	0.0727463	0.0357225	0.0442951	0.101568	0.0596059	0.0106728	0.000783183	0.27301
9	Tochigi	72	Image information production and distribution industry	0.00537479	0	0.000342517	0	0.0434615	0.000964264	0.00128529	0.0196761	0.000733667	0.0153141	0.00067056	0.0279409	0.124608	0	0.00194195	0	0.000290365	0	0	0.0264527	0.00577405	6.88865e-05	0.000929574	0.0130147	0.0185583	0.00201097	0.0396719	5.03527e-05	0.00284899	0	0.00979001	0.000909389	0.00161581	0.000346298	0.000562572	0.00687929	0.0260464	0.0178445	0.0164732	0.00775926	0.0171428	0.0261304	0.0430118	0.00611399	0.000785144	0.0527113
9	Tochigi	73	Public administration	0	0	0	0	0	0	0	0	0	0	0	0	0	0	0	0	0	0	0	0	0	0	0	0	0	0	0	0	0	0	0	0	0	0	0	0	0	0	0	0	0	0	0	0	0	0
9	Tochigi	74	Education and Research	0.923581	0	0.0308931	0	63.1817	5.89057	0.575867	3.97155	0.197229	14.7717	0.241306	11.2547	4.25785	0.101561	8.4897	0	2.5441	0.107334	0	199.643	153.74	0.0754456	0.899308	106.74	57.4359	12.59	24.9035	0.28125	3.4265	0	21.4444	1.29477	0.0408384	5.00639	4.95222	9.77984	8.87835	89.1488	164.048	13.3485	137.476	163.656	280.305	55.6617	3.86096	404.186
9	Tochigi	75	Medical service, health and social security and nursing care	0.911359	0	0.0312865	0	12.3079	2.32919	0.09072	3.84376	0.138092	1.8623	0.24792	4.27079	5.17448	0	0.460703	0	0.0601181	0	0	8.59302	6.12988	0.0356563	0.320771	6.73653	5.43288	0.375405	9.21034	0.026063	0.109234	0	2.34831	0.418407	1.41538	0.0896236	0.109197	1.32657	4.20087	15.6309	10.3031	9.8244	13.1495	3.61946	4.04231	0.421954	0.0812795	15.7407
9	Tochigi	76	Advertising and survery	3.63566	0	0.0101714	0	18.1919	7.29804	0.0379204	0.449554	0.0841773	4.75375	0.934389	10.2376	1.9335	0.00417982	0.224666	0	0.0125645	0	0	68.3171	5.97859	0.00745205	0	6.84438	3.81502	0.114121	0.494381	0.0181569	0.220686	0	1.23989	0.160317	0.094121	0.0124874	0.076073	0.695553	0.952834	3.18845	2.8618	2.48803	2.78917	2.56354	4.71483	0.755102	0.192521	9.26736
9	Tochigi	77	Giids rental and leasing services	2.52837	0	0.0295078	0	21.7975	1.07514	0.342249	1.15549	0.340074	5.11415	0.319561	6.88623	34.4414	0	0.640794	0	0.0535503	0	0	3.95329	0.591242	0.10836	1.60511	11.9949	4.71144	0.599045	9.7943	0.0355062	0.761232	0	3.43229	0.668661	1.11242	0.131488	0.617935	2.7218	9.28571	31.9664	24.5633	13.766	11.08	23.4799	18.2987	3.39099	0.268305	43.6246
9	Tochigi	78	Other business services	0.657169	0	0.010052	0	9.36026	0.437806	0.0895239	1.07914	0.162416	2.10185	0.0984295	3.67096	33.0941	0.00137691	0.336406	0	0.0262136	0.00194023	0	2.67633	1.38016	0.0490969	0.15459	5.96776	3.29951	0.592102	5.13871	0.00538312	0.312728	0	0.970052	0.452499	0.141738	0.213906	0.20215	1.24498	2.22071	6.38762	4.90527	1.7172	3.23484	3.75389	8.31044	1.04945	0.139897	7.11956
9	Tochigi	79	Personal services	6.99039	0	0	0	3.03568	0.107047	0	0.500951	0.0499791	0.460866	0	0.749435	5.62464	0	0.040422	0	0	0	0	1.02529	0.309054	0	0	1.20828	0.417958	0.0411724	0.874351	0	0.0131782	0	0.536788	0.0504775	0.186277	0	0.0351301	0.235848	0.66002	1.17145	0.964385	0.447259	0.670667	1.44021	0.916233	0.292706	0	1.89055
9	Tochigi	80	Activities not elsewhere classified	0	0	0	0	0	0	0	0	0	0	0	0	0	0	0	0	0	0	0	0	0	0	0	0	0	0	0	0	0	0	0	0	0	0	0	0	0	0	0	0	0	0	0	0	0	0
10	Gunma	1	Agriculture, forestry and fishery	54.8728	0	0	0	1606.08	44.5492	4.14521	0.169673	46.6968	0	0.174918	0.0978321	0	0	0.253283	0	0.151486	0	0	2.37942	3.28902	0	1.37407	0	271.811	0	0	0	0.798219	0	0	0	0	0	0.0366874	0	0	0	0	0	0	0	0	0	0	0
10	Gunma	2	Metallic ores	0	0	0	0	0	0	0	0	0	0	0	0	0	0	0	0	0	0	0	0	0	0	0	0	0	0	0	0	0	0	0	0	0	0	0	0	0	0	0	0	0	0	0	0	0	0
10	Gunma	3	Non-metallic ores	0	0	0.187005	0	0	0	0	0	0	0	0.49262	0	0	0	1.6644	0	0.0291354	0	0	0.480518	0.118239	-0.362887	0.194321	0	0.648703	46.6415	15.8789	0.454719	7.88789	0	0	0.304163	0	0.0289566	0.0176403	0.135348	0.260405	0	0	0.898351	0	0	0	0	0	0
10	Gunma	4	Coal mining, crude petroleum and natural gas	0	0	0	0	0	0	0	0	0	0	0	0	0	0	0	0	0	0	0	0	0	0	0	0	0	0	0	0	0	0	0	0	0	0	0	0	0	0	0	0	0	0	0	0	0	0
10	Gunma	5	Food and Tobacco	21.9963	0	0	0	5008.21	138.898	0	4.33564	0.0346422	0	0.199021	0	0	0	0.0420268	0	0.0301629	0	0	22.3622	4.83516	0	0	0.0598212	0	0	0	0	0.164417	0	0	0	0	0	0	0	0	0	0	0	0	0	0	0	0	0
10	Gunma	6	Beverage	5.94371	0	0	0	20.1231	90.5619	0	0	0	0	0	0	0	0	0	0	0.0665134	0	0	0	0.0674823	0	0	0	0	0	0	0	0	0	0	0	0	0	0	0	0	0	0	0	0	0	0	0	0	0
10	Gunma	7	Textile products	4.30291	0	0	0	0	0.0815554	38.7344	577.809	0	9.5504	0.692728	4.42501	7.60963	0	0	0	0	0	0	0.0694339	0	0	0	2.63013	40.1219	0.17566	0	0	1.04416	0	0	0	0	0	0.214115	0.102677	0.574683	0.348288	7.31467	0	0	0	0	0.0387831	0.657417	1.02882
10	Gunma	8	Wearing aparel and other textile products	23.1524	0	0.0717651	0	62.5134	1.47197	5.73745	28.657	1.59509	4.78812	0.511812	11.7365	8.94047	0	0.370553	0	0.118199	0	0	7.24067	1.37909	0	2.75919	1.69956	3.63796	0.956163	4.15608	0	2.14767	0	4.61705	0.462734	1.45464	0.0587369	0.679867	1.57864	5.8104	8.78897	5.15159	7.04606	4.88694	15.2625	8.42933	1.19257	0.359562	22.3514
10	Gunma	9	Timber and wooden products	2.48827	0	0	0	12.0117	0.523064	0	0.860039	97.9701	196.481	23.6466	76.3292	1.10921	0	0	0	0	0	0	1.16897	0	0	0	1.26514	0.0464152	1.99169	0.0890072	0.245824	0.998089	0	0	0.863269	0	0	1.88822	2.30485	5.01036	1.11689	1.30897	0.437089	5.54583	1.1604	1.29977	0.342017	0.0479138	1.48465
10	Gunma	10	Furniture and fixtures	0.129033	0	0	0	10.7605	0.37296	0.122022	2.15103	0.0928698	71.8707	0.133385	3.26386	5.76476	0	0.169	0	0.161723	0	0	4.50889	0.656315	0	0	3.52815	1.0061	0.114758	1.11698	0.0350559	0.661161	0	1.32993	0.281388	0	0	0.146875	0.18782	0.919825	1.19456	2.62826	0.914193	1.00656	1.58007	2.4714	0.283773	0.163987	15.1967
10	Gunma	11	Pulp, paper, paperboard, building paper	0.00426124	0	0	0	0.236906	0.0049267	0.0349241	0.00997001	0.0705402	0.534511	6.33874	19.4534	18.8938	0	0.0595318	0	0	0.0075108	0	0.578834	0.00541859	0	0	0.174772	0.0489643	0.0242548	0	0	0.0776334	0	0.02196	0	0.0171463	0	0.0097009	0	0.00433951	0.00525995	0	0.0164676	0	0.358214	0.00544109	0.00468571	0.00361037	0.155375
10	Gunma	12	Paper products	12.5099	0	0	0	417.969	38.6412	0.667039	4.95102	0.134385	18.5258	0	14.9873	19.3963	0.0778501	1.03253	0	0.156011	0	0	257.67	11.7922	0	0	7.03915	1.89005	5.00387	2.93872	0.439631	0.744112	0	0	0	0.250433	0	0.0472293	0	6.14799	1.99745	0.172871	1.76381	2.15009	3.00734	3.09935	1.02657	0.474585	10.7113
10	Gunma	13	Publishing, printing	0.273669	0	0.00661124	0	193.414	4.00782	0.172533	8.59072	0.196969	5.66076	0.0157166	64.3627	2587.96	0	0.504463	0	0	0	0	65.1	1.19866	0.0226039	0.0508372	0.566887	0.923421	1.81733	0.382871	0	0.311615	0	1.09692	0.431022	0.0815692	0.0189386	0.299972	0.619656	6.8745	5.96796	5.32094	2.42855	18.4341	2.37502	6.13465	0.234057	0.875946	34.4374
10	Gunma	14	Chemical fertilizer	8.29705	0	0	0	0	0.0444109	0	0	0	0	0	0	0	0.576573	1.97886	0	0.312934	0.0338525	0	3.44073	1.00132	0	0	0	0	0	0	0	0.0218692	0	2.27648	0	0	0	0	0	0	0	0	0	0	0	0	0.0211193	0	0
10	Gunma	15	Basic inorganic chemical products	0	0	0	0	45.9974	1.3817	2.2854	0.0233009	0	0.198287	0.597101	1.61222	0.173632	0.398627	35.3743	0	4.06913	0.0702141	0	160.453	24.2639	0	0	8.81285	30.9627	7.73764	1.25396	0	0.113398	0	12.2148	0.130307	0.0534302	0.0496214	0.0604587	1.33365	1.09532	0.835927	0.848293	1.12894	0.488321	1.23929	2.49241	1.0732	0	3.22457
10	Gunma	16	Basic organic chemical products	0	0	0	0	0	0	0	0	0	0	0	0	0	0	0	0	0	0	0	0	0	0	0	0	0	0	0	0	0	0	0	0	0	0	0	0	0	0	0	0	0	0	0	0	0	0
10	Gunma	17	Organic chemical products	0.147523	0	0	0	1.38516	0.245608	0.436503	0.00230106	0.0127413	0.011749	0.0569327	0.0238819	0.162895	0	0.206097	0	2.27546	0.147346	0	18.4708	3.88812	0	0.00657698	2.57668	3.34182	0.030089	0	0	0.0111985	0	0	0	0	0.00122508	0.0223895	0.00286311	0.020031	0.0898349	0.00182113	0.0228041	0.324413	0.044267	0.0100463	0.00540727	0.0333306	0.0358603
10	Gunma	18	Synthetic resins	0	0	0	0	0	0	0.0593897	0	0	0.262587	0.292141	0.762508	0.16424	0	0	0	0	0	0	52.4461	0	0	0	74.6275	0	0	0	0	0.0750854	0	0	0	0	0	0.0428914	0	0	0	0	0.0728097	0.25195	2.31959	0	0.0932281	0.095777	2.0884
10	Gunma	19	Synthetic fibers	0	0	0	0	0	0	0.679676	2.27392	0	0.0478778	0.00621442	0	0	0	0	0	0	0	0	0	0	0	0.0134008	0.0647544	0.0131577	0	0	0	0	0	0	0	0	0	0	0	0	0	0	0	0	0	0	0	0	0
10	Gunma	20	Final chemical products	2.7921	0	0.0996664	0	19.9604	1.10816	1.65517	2.29131	4.07913	9.20999	2.60626	42.839	740.092	0	7.49577	0	1.38411	0	0	363.724	24.1377	0.309782	2.4385	14.1397	4.99372	0.296502	2.03328	0	3.25042	0	0.966416	0.363513	0.111789	0	0.411106	0.970546	6.19604	2.572	2.39217	1.82519	19.0405	3.17217	2.68718	1.44347	0.0706157	7.56713
10	Gunma	21	Medicaments	32.1708	0	0	0	1.8592	0	0	0.025429	0	0	0	0	0	0	0	0	0	0	0	8.72969	52.2687	0	0	0	0	0	0	0	0	0	0	0	0	0	0	0	0	0	0	0	0	0	0	0	0	0
10	Gunma	22	Petroleum refinery products	0.0218409	0	2.02501e-05	0	0.0552326	0.000484574	0.00179091	0.000299633	0.000167587	0.000927209	0.000625816	0.00179049	0.0554643	5.82506e-05	0.00459483	0	0.00245141	0	0	0.0123766	0.000444129	0.00456953	0.0175178	0.000636667	0.00164354	0.00447304	0.00212557	0.000202431	0.00217407	0	0.0133194	0.000304665	0	0.00020303	0.000530083	0.00149128	0.00488472	0.00224186	0.000776093	0.0005399	0.000207585	0.000801445	0.000713557	0.00138261	0	0.00101881
10	Gunma	23	Coal products	0	0	0	0	0	0	0	0	0	0	0.00374234	0	0	0	0.0147515	0	0.0181496	0	0	0.00237567	0	0	0	0	0	0	0	0	0.0508406	0	0.671639	0.236844	0	0.0300637	0.0109889	0.00351307	0	0	0.0089382	0.00310899	0	0	0	0	0	0.00352007
10	Gunma	24	Plastic products	12.5222	0	0	0	255.61	31.1454	0.464386	13.0488	1.96916	32.1605	2.33872	109.025	968.459	0.131625	2.84832	0	0.0659439	0	0	144.183	22.8813	0	0	708.984	49.5749	1.90918	0.496862	0	0.838736	0	0	0	0	0.065539	7.90541	3.36975	6.53686	7.79348	68.0039	8.67536	56.8742	39.5627	27.3432	36.8539	2.40721	222.924
10	Gunma	25	Rubber products	6.73922	0	0.0145795	0	6.02225	0.116293	0.105689	1.62776	0.0723948	1.00135	0.0693185	1.35695	7.34353	0	0.0292756	0	0.0630339	0	0	0.858076	0.362396	0	0.112109	0.833424	28.2618	0	1.95252	0	0.801725	0	2.85097	0.0365584	0.0449704	0	0.025443	1.95215	1.39992	16.596	14.9625	2.6778	19.6534	8.07825	7.10676	1.53003	0.340887	18.2157
10	Gunma	26	Glass and glass products	0.0295831	0	0	0	7.63303	21.3768	0	0	0	9.74814	0	0	0.0967076	0	0.284138	0	0	0	0	28.1876	3.46084	0	0	3.01495	0.145683	3.44138	0.0465611	0	0.437905	0	0	0	0	0	0	0.215305	0.361518	0.401682	0.0547794	0	2.04397	0.117489	3.98516	1.903	0.100258	1.03552
10	Gunma	27	Cement and cement products	0	0	0	0	0	0	0	0	0	0	0	0	0	0	0	0	0	0	0	0	0	0	0	0	0	0	52.0872	0	0.0316662	0	0	0	0	0	0	0	0	0	0	0	0	0	0	0	0	0
10	Gunma	28	Pottery, china and earthenware	0	0	0	0	0.0200278	0	0	0	0	0.0190725	0	0	0	0	0.000557608	0	0	0	0	0.0006286	0	0	0	0.000793703	0	0	0.00100512	0.00173498	0	0	0	0	0	0	0	0	0.00130068	0.000788281	0	0	0	0.024517	0.00163086	0.000351112	0	0.0223539
10	Gunma	29	Other ceramic, stone and clay products	0.15106	0	0	0	0.574239	0	0	0	0	0.250639	0.0433763	0	0.0548686	0	1.28968	0	0	0	0	0.214778	0.128059	0	1.57143	0.208607	0.0551039	0.620986	44.3545	0.10032	5.44684	0	0.64873	0.512434	0	0.0104538	0.114632	0.36647	1.33323	10.9599	1.6317	1.29727	0.112227	1.27764	0.514361	0.498322	0.0142207	0.869042
10	Gunma	30	Pig iron and crude steel	0	0	0	0	0	0	0	0	0	0	0	0	0	0	0.00599495	0	0	0	0	0	0	0	0	0	0	0	0	0	0	0	-8.01413	2.32449	-1.99372	0	0	-0.199877	-2.0836	-0.665285	-1.42392	-0.110554	-0.080338	-0.190873	-0.00219171	-0.0113246	-0.0116342	-0.0976343
10	Gunma	31	steel products	0.0113409	0	0	0	0	0	0	0	0.0408124	5.36846	0	0	0	0	0	0	0	0	0	0	0	0	0	0.556761	0.665535	0	1.51722	0	0.0258269	0	121.039	1.43443	78.8014	0	0.0473333	8.88945	37.3388	12.1511	13.1671	4.0321	2.28121	9.23706	1.43	1.70848	0.245022	2.08
10	Gunma	32	Cast and forged steel products	0	0	0	0	0	0	0	0	0	0.53109	0	0	0	0	0	0	0	0	0	0	0	0	0	0	0	0	0	0	0.0303725	0	0	0	0	0	0.0404831	6.05694	4.67221	56.0394	28.4502	29.8251	7.3719	11.0879	2.21387	0.381304	0.0451995	0.622464
10	Gunma	33	Other iron or steel products	0	0	0	0	0	0	0	0	0	123.067	0	0	0	0	0.120469	0	0	0	0	0.203711	0	0	0	0.171477	0	0	2.2801	0	0.7855	0	0	1.95569	0	0	0.261745	198.016	383.365	150.295	101.042	18.8392	28.3674	38.6302	0.440427	9.40622	4.38359	54.9856
10	Gunma	34	Non-ferrous metals	0	0	0	0	0	0	0	0	0	0.923044	0.0159745	0	-11.3832	0	17.6491	0	0.464839	0	0	50.0445	0	0	0	0.960315	-0.0253668	1.53929	0	0.0839672	1.46047	0	150.833	0.438095	-0.33163	28.1618	199.237	-1.66454	31.2225	-2.32716	3.92027	2.38878	-0.723285	10.1879	1.55883	121.429	0.0523717	4.82326
10	Gunma	35	Non-ferrous metal products	0	0	0	0	6.07835	0.32433	0	0	0.0807606	14.6894	0	0.454127	5.93013	0	0.24494	0	0	0	0	1.60153	0.107014	0	0	4.32326	2.90104	0.099795	0	0	0.415244	0	0	0	0	0.384375	43.1282	23.9279	42.5656	54.9874	31.6343	29.0534	15.6931	62.1292	50.1828	93.8044	1.71126	230.919
10	Gunma	36	Metal products for construction and architecture	0.0557624	0	0	0	0	0	0	0	0	0.555126	0	0	0	0	0	0	0	0	0	0	0	0	0	0	0	0	0	0	0	0	0	0	0	0	0	9.33424	1.41967	0.344157	0	0.287326	0	0	0	0	0	0.121994
10	Gunma	37	Other metal products	2.23461	0	0.0359889	0	89.6658	53.0113	0	12.9256	11.0796	96.317	0.556107	5.69426	11.1829	0	3.68555	0	0.726117	0	0	75.0304	7.5248	0.246093	1.24532	5.76035	38.5836	2.53209	5.08023	0	13.0521	0	0	2.52679	0.111007	0	1.88415	147.937	338.989	180.109	131.416	66.6334	109.847	57.5763	42.2187	8.32721	3.01524	82.264
10	Gunma	38	General industrial machinery	0	0	0	0	0	0	0	0	0	0.569423	0	0	0	0	0	0	0	0	0	0	0	0	0	11.1159	0	0.0369968	0.0818413	0	0.6809	0	0	0.396884	0.557951	0	0.0789182	0.302756	2.27702	1000.59	133.116	28.3339	36.6226	10.9108	10.3246	0.171535	0.660845	2.00976
10	Gunma	39	Special industrial machinery	0	0	0	0	0	0	0	0	0	0	0	0	0	0	0	0	0	0	0	0	0	0	0	0	0	0	0	0	0	0	0	0	0	0	0	0	0	1.8404	756.585	0	0.103845	0	0.0594931	0.461104	0	0
10	Gunma	40	Other general machines	0	0	0	0	0	0	0	0	0	6.34403	0	0	0	0	0	0	0	0	0	0.387204	0	0	0	1.07559	0	0.055976	0	0	0.313539	0	0	0.428918	0	0	0.119403	0.80162	2.40357	151.593	110.572	305.962	12.1867	13.7479	9.54342	0.865108	0.66657	8.31906
10	Gunma	41	Machinery for office and service industry	0	0	0	0	0	0	0	0	0	0	0	0	0	0	0	0	0	0	0	0	0	0	0	0	0	0	0	0	0	0	0	0	0	0	0	0	0	0	0	0	868.775	0	0	0	0	0
10	Gunma	42	Industrial electric equipment	1.75126	0	0	0	0	0	0	0	0	0.307661	0	0	0	0	0	0	0	0	0	0	0	0	0	0	0	0	0	0	0	0	0	0	0	0	0	0	0	115.587	142.398	1.19431	104.238	504.177	162.383	24.9775	3.66577	110.206
10	Gunma	43	Applied electric equipment and electric mesuring instruments	0	0	0	0	0	0	0	0	0	0	0	0	0	0	0	0	0	0	0	0	0	0	0	0	0	0	0	0	0	0	0	0	0	0	0	0	0	10.8365	45.4129	3.00877	7.98816	60.8284	417.433	0	0	10.396
10	Gunma	44	Other electric equipment	1.49279	0	0.0270469	0	0	0	0	0	0	1.11458	0	0	0	0	0	0	0	0	0	0.734697	0	0	0	0	0	0	0	0	0	0	0	0	0	0	0	0	2.28032	7.21708	20.7317	4.32668	18.1605	46.2761	27.5593	168.732	1.58097	181.164
10	Gunma	45	Household electric and electric applications	0	0	0	0	0	0	0	0	0	0	0	0	0	0	0	0	0	0	0	0	0	0	0	0	0	0	0	0	0	0	0	0	0	0	0	0	0	0	0	0	0	0	0	0	7.56015	0
10	Gunma	46	Communication equipment	0	0	0	0	0	0	0	0	0	0	0	0	0.152999	0	0	0	0	0	0	0	0.0446359	0	0	0	0	0	0	0	0	0	0	0	0	0	0	0	0	0.866581	0.162498	0	0	0.0232347	1.88249	0.0192994	0	32.5609
10	Gunma	47	Electric computing equipment and accessory equipment	0	0	0	0	0	0	0	0	0	0	0	0	0	0	0	0	0	0	0	0	0	0	0	0	0	0	0	0	0	0	0	0	0	0	0	0	0	0	11.072	0	0	0	0	0	0	2.14366
10	Gunma	48	Semiconductor devices and integrated circuits	0	0	0	0	0	0	0	0	0	0	0	0	0	0	0	0	0	0	0	0	0	0	0	0	0	0	0	0	0	0	0	0	0	0	0	0	1.67078	6.07548	39.494	10.7181	654.409	406.384	2686.94	20.2314	24.3258	3490.17
10	Gunma	49	Other electrical equipment	0	0	0	0	0	0	0	0	0	0	0	0.0281005	1.36186	0	0	0	0	0	0	0	0	0	0	0	0	0	0	0	0	0	0	0	0	0	0.0210756	0	0.0565666	4.04532	8.49846	0.232547	34.4786	24.2018	206.988	0.641334	1.16478	270.476
10	Gunma	50	Passenger motor cars	0	0	0	0	0	0	0	0	0	0	0	0	0	0	0	0	0	0	0	0	0	0	0	0	0	0	0	0	0	0	0	0	0	0	0	0	0	0	0	0	0	0	0	0	0	0
10	Gunma	51	Other cars	0	0	0	0	0	0	0	0	0	0	0	0	0	0	0	0	0	0	0	0	0	0	0	0	0	0	0	0	0	0	0	0	0	0	0	0	0	0	0	0	0	0	0	0	0	0
10	Gunma	52	Motor vheicle parts and accessories	0	0	0	0	0	0	0	0	0	0	0	0	0	0	0	0	0	0	0	0	0	0	0	0	0	0	0	0	0	0	0	0	0	0	0	0	0	0	0.441982	0	0	0	0	0	0	0
10	Gunma	53	Other transportation equipment	4.62099	0	0	0	0	0	0	0	0	0	0	0	0	0	0	0	0	0	0	0	0	0	0	0	0	0	0	0	0	0	0	0	0	0	0	0	0	0	0	0	0	0	0	0	0	0
10	Gunma	54	Precision instruments	1.92329	0	0	0	0	0	0.016167	0.0149997	0.0184567	0	0.0265087	0.0518922	0.0558867	0	0	0	0	0	0	0.0757256	0.0326087	0	0	0.286845	0	0	0	0	0	0	0	0	0	0	0.0194598	0.0373269	0.0522297	6.48906	17.8544	0.0991008	5.57258	2.91954	4.86249	0.0140991	0.0217269	5.85332
10	Gunma	55	Miscellaneous manufacturing products	2.24102	0	0.027069	0	4.91026	0.7677	0.0784909	51.899	0.686992	10.6591	0.0858001	0.755812	1.62798	0	0	0	0.130035	0	0	1.0621	0	0	0.346913	0.515791	0.306556	1.09251	0.391907	0.112748	2.74077	0	0	1.13127	0.0556628	0	0.503879	0.966521	0.676202	8.65733	2.72806	0.427676	0	0.439516	1.85468	0.114086	0.0351615	7.47522
10	Gunma	56	Reuse and recycling	0	0	0	0	0	6.70391	0	0	0	0	0.274372	0	0	0	0.249581	0	0	0	0	0	0	0	0	7.30811	0.0335147	0.406743	0.51415	0.0221875	0.0232478	0	1.36782	6.05525	0.547688	3.89114	9.0481	0	0	0	0	0	0	0	0	0	0	0
10	Gunma	57	Building construction and repair of construction	0	0	0	0	0	0	0	0	0	0	0	0	0	0	0	0	0	0	0	0	0	0	0	0	0	0	0	0	0	0	0	0	0	0	0	0	0	0	0	0	0	0	0	0	0	0
10	Gunma	58	Public construction	0	0	0	0	0	0	0	0	0	0	0	0	0	0	0	0	0	0	0	0	0	0	0	0	0	0	0	0	0	0	0	0	0	0	0	0	0	0	0	0	0	0	0	0	0	0
10	Gunma	59	Other civil enginnering and construction	0	0	0	0	0	0	0	0	0	0	0	0	0	0	0	0	0	0	0	0	0	0	0	0	0	0	0	0	0	0	0	0	0	0	0	0	0	0	0	0	0	0	0	0	0	0
10	Gunma	60	Electricity	0.0732883	0	0.00407481	0	2.59431	0.180139	0.0322723	0.108316	0.0531508	0.151768	0.072001	0.186796	1.79502	0.000699787	0.0820664	0	0.0305016	0.000246521	0	0.551234	0.0473081	0.0515686	0.0327363	0.556605	0.342315	0.0387101	0.175665	0.00243188	0.0678431	0	0.908895	0.175683	0.0994242	0.0810124	0.0450012	0.149023	0.554061	0.455432	0.469024	0.217282	0.125314	0.212928	0.0996523	0.0519828	0.03555	0.37371
10	Gunma	61	Gas supply and heat supply	0	0	0	0	0	0	0	0	0	0	0	0	0	0	0	0	0	0	0	0	0	0	0	0	0	0	0	0	0	0	0	0	0	0	0	0	0	0	0	0	0	0	0	0	0	0
10	Gunma	62	Water supply and waste management services	0.0227926	0	0.00036708	0	3.1613	0.358193	0.0494948	0.0232075	0.0145819	0.0630292	0.0410142	0.12641	0.56296	0	0.0405402	0	0.0269799	0.000743962	0	0.723748	0.215763	0.00941287	0.008468	0.159476	0.0824504	0.0189196	0.490272	0.00137607	0.0778589	0	0.311051	0.00920458	0.0147193	0.0194535	0.0160149	0.0835563	0.154742	0.499128	0.41502	0.12723	0.158044	0.135781	0.0932388	0.0255272	0.0200265	0.204383
10	Gunma	63	Commerce	32.3049	0	0.0827502	0	812.682	37.7632	3.25746	52.8087	8.98993	54.1591	8.91791	107.264	419.87	0.0577057	5.61931	0	2.41402	0.111807	0	128.012	20.6495	0.548701	5.32186	65.3789	36.3877	3.30288	58.1968	0.17547	6.60566	0	65.885	5.70932	45.1237	1.38637	6.75659	29.4963	58.3502	106.161	128.459	34.676	80.9078	56.0191	117.004	25.0284	3.15626	198.113
10	Gunma	64	Financial and insurance	16.742	0	0.0983794	0	59.5186	6.17077	2.75541	32.3739	1.88	21.6629	2.30684	38.1447	95.9675	0.0128634	1.67016	0	0.328671	0.009063	0	13.959	3.30844	0.810322	0.206315	11.8227	11.3946	2.53894	49.8844	0.156458	3.24358	0	14.0441	1.60347	6.22073	2.98472	0.936457	8.8766	10.3993	31.4176	22.813	23.898	9.03061	13.7501	10.669	1.49268	0.514066	23.5557
10	Gunma	65	Real estate agencies and rental services	0	0	0	0	0	0	0	0	0	0	0	0	0	0	0	0	0	0	0	0	0	0	0	0	0	0	0	0	0	0	0	0	0	0	0	0	0	0	0	0	0	0	0	0	0	0
10	Gunma	66	House rent	0	0	0	0	0	0	0	0	0	0	0	0	0	0	0	0	0	0	0	0	0	0	0	0	0	0	0	0	0	0	0	0	0	0	0	0	0	0	0	0	0	0	0	0	0	0
10	Gunma	67	Transport	36.312	0	0.978374	0	116.181	11.6868	0.985466	7.18152	4.90927	10.3742	1.30737	16.3524	120.305	0	1.96044	0	0.409638	0	0	28.0124	7.17371	1.04225	0.427636	13.9054	4.92965	1.68509	114.617	0.0514754	19.2981	0	32.9786	1.15692	5.65438	0.820147	1.93383	13.2794	21.0509	28.5096	22.3664	13.07	13.8194	10.6288	24.4895	2.70847	0.409352	52.277
10	Gunma	68	Communication	3.1898	0	0.0211144	0	3.65262	0.224558	0.103611	2.20225	0.0215064	2.92266	0.119694	3.28031	20.2364	0	0.169591	0	0.023407	0	0	3.51481	9.12871	0.283208	0.299741	3.48168	3.56227	0.252465	0.599633	0	0.204145	0	1.28966	0.382831	0.0901761	0.38617	0.368471	2.71841	2.87563	10.0602	4.61323	3.02161	2.86374	3.98047	3.70575	0.488756	0.0759508	5.87259
10	Gunma	69	Broadcasting	0	0	0	0	0	0	0	0	0	0	0	0	0	0	0	0	0	0	0	0	0	0	0	0	0	0	0	0	0	0	0	0	0	0	0	0	0	0	0	0	0	0	0	0	0	0
10	Gunma	70	Information services	0.604809	0	0.00324686	0	2.37576	0.310782	0.021654	0.138013	0.041918	1.115	0.0401368	1.08487	3.96565	0	0.0325984	0	0.0159093	0	0	0.839341	1.22008	0.0011101	0.0324568	1.36604	0.504982	0.100408	0.589952	0.00486859	0.0697172	0	0.515625	0.0911852	0.236352	0.0558059	0.083859	0.302147	1.03413	2.20834	2.70858	0.963771	1.15162	2.38124	4.82048	0.865393	0.0126526	5.12278
10	Gunma	71	﻿Internet based services	0.00530978	0	0	0	0.0246	0.00460424	0.000627659	0.0098998	0.00119426	0.0254388	0.000686108	0.020818	0.0914898	0	0.000869302	0	0	0	0	0.00783983	0.0603452	0.000246693	0.000554824	0.0445454	0.00653707	0.00188894	0.0135803	0	0.00132257	0	0.00598577	0.00289481	0.000445112	0.000413382	0.00277015	0.0169069	0.0219672	0.0438315	0.0261168	0.0128248	0.0159024	0.0364643	0.0213992	0.00383165	0.000281172	0.0980137
10	Gunma	72	Image information production and distribution industry	0.0868265	0	0.00553316	0	0.702093	0.0155771	0.0207631	0.317856	0.0118519	0.24739	0.0108325	0.451367	2.01296	0	0.031371	0	0.00469066	0	0	0.427328	0.0932762	0.00111282	0.0150167	0.210245	0.299798	0.032486	0.640875	0.000813416	0.0460236	0	0.158152	0.0146906	0.0261024	0.00559424	0.00908801	0.111131	0.420764	0.288267	0.266115	0.125346	0.276931	0.422121	0.69483	0.0987677	0.0126835	0.851519
10	Gunma	73	Public administration	0	0	0	0	0	0	0	0	0	0	0	0	0	0	0	0	0	0	0	0	0	0	0	0	0	0	0	0	0	0	0	0	0	0	0	0	0	0	0	0	0	0	0	0	0	0
10	Gunma	74	Education and Research	3.35994	0	0.112387	0	229.852	21.4296	2.09497	14.4483	0.717507	53.7387	0.877856	40.944	15.4898	0.369473	30.885	0	9.25528	0.390473	0	726.292	559.298	0.274467	3.27163	388.316	208.948	45.8019	90.5974	1.02317	12.4654	0	78.0134	4.7103	0.148568	18.2129	18.0159	35.5785	32.2989	324.318	596.799	48.5611	500.131	595.371	1019.73	202.494	14.046	1470.41
10	Gunma	75	Medical service, health and social security and nursing care	0.822878	0	0.028249	0	11.1129	2.10306	0.0819124	3.47058	0.124685	1.6815	0.223851	3.85616	4.67211	0	0.415976	0	0.0542815	0	0	7.75876	5.53476	0.0321945	0.289628	6.08251	4.90542	0.338958	8.31614	0.0235326	0.098629	0	2.12032	0.377786	1.27796	0.0809224	0.0985957	1.19778	3.79302	14.1134	9.30281	8.87059	11.8729	3.26806	3.64986	0.380988	0.0733884	14.2125
10	Gunma	76	Advertising and survery	1.68094	0	0.00470275	0	8.41101	3.37424	0.0175325	0.207851	0.0389193	2.19789	0.432014	4.73336	0.893952	0.00193253	0.103874	0	0.00580918	0	0	31.5864	2.7642	0.00344545	0	3.16449	1.76387	0.0527639	0.228577	0.00839484	0.102034	0	0.573261	0.0741225	0.0435168	0.00577352	0.0351722	0.321588	0.440542	1.47418	1.32315	1.15034	1.28957	1.18525	2.1799	0.349121	0.089012	4.28475
10	Gunma	77	Giids rental and leasing services	2.04745	0	0.0238951	0	17.6514	0.870637	0.27715	0.935703	0.275389	4.14139	0.258778	5.5764	27.8903	0	0.518909	0	0.0433645	0	0	3.20134	0.478782	0.0877493	1.2998	9.71335	3.81528	0.485101	7.93134	0.0287526	0.616439	0	2.77944	0.541475	0.90083	0.106478	0.500398	2.20409	7.51948	25.8861	19.8911	11.1476	8.97245	19.0138	14.8181	2.746	0.217271	35.3268
10	Gunma	78	Other business services	0	0	0	0	0	0	0	0	0	0	0	0	0	0	0	0	0	0	0	0	0	0	0	0	0	0	0	0	0	0	0	0	0	0	0	0	0	0	0	0	0	0	0	0	0	0
10	Gunma	79	Personal services	6.28306	0	0	0	2.72852	0.0962153	0	0.450262	0.0449219	0.414233	0	0.673603	5.05551	0	0.0363318	0	0	0	0	0.921543	0.277782	0	0	1.08602	0.375666	0.0370063	0.785879	0	0.0118448	0	0.482472	0.0453699	0.167428	0	0.0315754	0.211984	0.593236	1.05292	0.866804	0.402002	0.602805	1.29448	0.823523	0.263089	0	1.69925
10	Gunma	80	Activities not elsewhere classified	0	0	0	0	0	0	0	0	0	0	0	0	0	0	0	0	0	0	0	0	0	0	0	0	0	0	0	0	0	0	0	0	0	0	0	0	0	0	0	0	0	0	0	0	0	0
11	Saitama	1	Agriculture, forestry and fishery	11.6626	0	0	0	341.353	9.46839	0.881015	0.0360619	9.92483	0	0.0371768	0.020793	0	0	0.0538322	0	0.0321964	0	0	0.505716	0.699041	0	0.292042	0	57.7702	0	0	0	0.169652	0	0	0	0	0	0.00779745	0	0	0	0	0	0	0	0	0	0	0
11	Saitama	2	Metallic ores	0	0	0	0	0	0	0	0	0	0	0	0	0	0	0	0	0	0	0	0	0	0	0	0	0	0	0	0	0	0	0	0	0	0	0	0	0	0	0	0	0	0	0	0	0	0
11	Saitama	3	Non-metallic ores	0	0	0.166782	0	0	0	0	0	0	0	0.439347	0	0	0	1.48441	0	0.0259847	0	0	0.428555	0.105453	-0.323644	0.173307	0	0.578552	41.5977	14.1618	0.405545	7.03489	0	0	0.271271	0	0.0258252	0.0157327	0.120711	0.232245	0	0	0.801203	0	0	0	0	0	0
11	Saitama	4	Coal mining, crude petroleum and natural gas	0	0	0	0	0	0	0	0	0	0	8.72411e-05	8.26351e-06	0	1.53239e-05	5.94274e-06	0	7.67725e-06	0	0	2.27778e-05	1.73091e-06	0.00863123	0	0	6.70332e-06	4.89087e-05	0.000364211	4.43776e-06	5.96729e-05	0	0.000206938	1.48421e-06	0	7.63012e-06	1.03295e-06	1.98136e-06	0	0	0	3.50693e-06	0	0	0	0	0	0
11	Saitama	5	Food and Tobacco	45.0044	0	0	0	10246.8	284.186	0	8.87072	0.070878	0	0.407197	0	0	0	0.0859868	0	0.0617132	0	0	45.753	9.89273	0	0	0.122394	0	0	0	0	0.336397	0	0	0	0	0	0	0	0	0	0	0	0	0	0	0	0	0
11	Saitama	6	Beverage	0.952	0	0	0	3.22311	14.5053	0	0	0	0	0	0	0	0	0	0	0.0106534	0	0	0	0.0108086	0	0	0	0	0	0	0	0	0	0	0	0	0	0	0	0	0	0	0	0	0	0	0	0	0
11	Saitama	7	Textile products	3.31976	0	0	0	0	0.0629211	29.8841	445.788	0	7.36827	0.534449	3.41396	5.87094	0	0	0	0	0	0	0.0535692	0	0	0	2.02918	30.9546	0.135524	0	0	0.805587	0	0	0	0	0	0.165193	0.0792166	0.443375	0.268709	5.64337	0	0	0	0	0.0299217	0.507206	0.793747
11	Saitama	8	Wearing aparel and other textile products	19.3378	0	0.0599408	0	52.2134	1.22944	4.79213	23.9354	1.33228	3.99922	0.427484	9.80279	7.4674	0	0.3095	0	0.0987244	0	0	6.04767	1.15187	0	2.30458	1.41953	3.03856	0.798622	3.47131	0	1.79381	0	3.85633	0.386492	1.21497	0.0490592	0.567849	1.31854	4.85305	7.34087	4.30279	5.88513	4.08175	12.7478	7.04049	0.996076	0.300319	18.6687
11	Saitama	9	Timber and wooden products	3.24133	0	0	0	15.647	0.681366	0	1.12032	127.62	255.944	30.8031	99.4297	1.4449	0	0	0	0	0	0	1.52275	0	0	0	1.64803	0.0604624	2.59446	0.115945	0.32022	1.30015	0	0	1.12453	0	0	2.45968	3.0024	6.52672	1.45491	1.70512	0.56937	7.22424	1.51159	1.69314	0.445526	0.0624145	1.93396
11	Saitama	10	Furniture and fixtures	0.199992	0	0	0	16.678	0.57806	0.189126	3.33394	0.143941	111.394	0.206737	5.05875	8.93496	0	0.261937	0	0.250659	0	0	6.98844	1.01724	0	0	5.46837	1.55938	0.177867	1.73123	0.054334	1.02475	0	2.06129	0.43613	0	0	0.227645	0.291107	1.42566	1.85148	4.07361	1.41693	1.56009	2.44899	3.83049	0.439828	0.254167	23.5538
11	Saitama	11	Pulp, paper, paperboard, building paper	0.0873091	0	0	0	4.85399	0.100944	0.715565	0.204277	1.44531	10.9517	129.875	398.583	387.118	0	1.21976	0	0	0.15389	0	11.8598	0.111022	0	0	3.58093	1.00324	0.49696	0	0	1.59064	0	0.449941	0	0.351313	0	0.198763	0	0.0889129	0.107772	0	0.337407	0	7.33949	0.111483	0.0960062	0.0739733	3.1835
11	Saitama	12	Paper products	36.7718	0	0	0	1228.59	113.583	1.96071	14.5531	0.395014	54.4552	0	44.054	57.0138	0.228834	3.03504	0	0.458583	0	0	757.402	34.6621	0	0	20.691	5.55565	14.7085	8.63813	1.29226	2.18726	0	0	0	0.736127	0	0.138827	0	18.0715	5.87134	0.50814	5.18459	6.32003	8.83983	9.1103	3.01751	1.39501	31.4852
11	Saitama	13	Publishing, printing	2.80196	0	0.0676893	0	1980.27	41.0341	1.76648	87.9563	2.01667	57.9578	0.160915	658.979	26496.9	0	5.16496	0	0	0	0	666.528	12.2725	0.23143	0.520498	5.80409	9.45447	18.6068	3.92004	0	3.19048	0	11.2309	4.41303	0.835148	0.193903	3.07127	6.34437	70.3847	61.1031	54.4786	24.8648	188.737	24.3167	62.8098	2.39639	8.96839	352.588
11	Saitama	14	Chemical fertilizer	6.88213	0	0	0	0	0.0368374	0	0	0	0	0	0	0	0.478248	1.6414	0	0.259569	0.0280795	0	2.85397	0.830564	0	0	0	0	0	0	0	0.0181398	0	1.88826	0	0	0	0	0	0	0	0	0	0	0	0	0.0175178	0	0
11	Saitama	15	Basic inorganic chemical products	0	0	0	0	14.8263	0.445363	0.73665	0.00751057	0	0.0639136	0.192463	0.519665	0.0559666	0.128489	11.4022	0	1.3116	0.022632	0	51.7187	7.82095	0	0	2.84064	9.98018	2.49406	0.404188	0	0.0365516	0	3.93719	0.0420018	0.0172221	0.0159944	0.0194876	0.429874	0.353055	0.269444	0.273429	0.363889	0.1574	0.399461	0.803377	0.345923	0	1.03937
11	Saitama	16	Basic organic chemical products	0	0	0	0	0	0	0	0	0	0	0	0	0	0	0	0	0	0	0	0	0	0	0	0	0	0	0	0	0	0	0	0	0	0	0	0	0	0	0	0	0	0	0	0	0	0
11	Saitama	17	Organic chemical products	0.854736	0	0	0	8.02551	1.42303	2.52906	0.0133322	0.073822	0.0680726	0.329864	0.13837	0.9438	0	1.19411	0	13.1839	0.853709	0	107.018	22.5275	0	0.0381066	14.9291	19.3623	0.174334	0	0	0.0648834	0	0	0	0	0.007098	0.129723	0.0165886	0.116058	0.520497	0.0105515	0.132125	1.87963	0.256479	0.0582077	0.0313293	0.193115	0.207772
11	Saitama	18	Synthetic resins	0	0	0	0	0	0	0.0106641	0	0	0.0471507	0.0524574	0.136918	0.0294914	0	0	0	0	0	0	9.41734	0	0	0	13.4003	0	0	0	0	0.0134825	0	0	0	0	0	0.00770169	0	0	0	0	0.0130739	0.0452408	0.41651	0	0.0167403	0.0171979	0.374998
11	Saitama	19	Synthetic fibers	0	0	0	0	0	0	0	0	0	0	0	0	0	0	0	0	0	0	0	0	0	0	0	0	0	0	0	0	0	0	0	0	0	0	0	0	0	0	0	0	0	0	0	0	0	0
11	Saitama	20	Final chemical products	11.733	0	0.41882	0	83.8781	4.65674	6.95539	9.62858	17.1414	38.7024	10.9521	180.019	3110.03	0	31.4989	0	5.81635	0	0	1528.45	101.432	1.30177	10.2471	59.4182	20.9847	1.24597	8.5443	0	13.659	0	4.06109	1.52756	0.469762	0	1.72756	4.07844	26.0371	10.8081	10.0524	7.66985	80.0124	13.3302	11.2921	6.06576	0.296743	31.7987
11	Saitama	21	Medicaments	117.972	0	0	0	6.81778	0	0	0.0932496	0	0	0	0	0	0	0	0	0	0	0	32.0123	191.672	0	0	0	0	0	0	0	0	0	0	0	0	0	0	0	0	0	0	0	0	0	0	0	0	0
11	Saitama	22	Petroleum refinery products	0.50342	0	0.000466753	0	1.27308	0.0111691	0.0412794	0.00690637	0.00386278	0.0213716	0.0144247	0.0412696	1.27842	0.00134264	0.105908	0	0.0565036	0	0	0.285273	0.0102369	0.105325	0.403774	0.0146748	0.0378827	0.103101	0.0489931	0.0046659	0.0501111	0	0.307005	0.00702234	0	0.00467973	0.0122181	0.0343732	0.11259	0.0516735	0.0178885	0.0124444	0.00478472	0.0184728	0.0164471	0.0318684	0	0.023483
11	Saitama	23	Coal products	0	0	0	0	0	0	0	0	0	0	0.0643762	0	0	0	0.253758	0	0.312212	0	0	0.0408665	0	0	0	0	0	0	0	0	0.874566	0	11.5536	4.07422	0	0.517159	0.189032	0.0604322	0	0	0.153756	0.0534812	0	0	0	0	0	0.0605527
11	Saitama	24	Plastic products	16.6243	0	0	0	339.344	41.3481	0.61651	17.3233	2.61422	42.6957	3.10485	144.739	1285.71	0.174742	3.78138	0	0.0875458	0	0	191.414	30.3768	0	0	941.233	65.8147	2.53459	0.659625	0	1.11349	0	0	0	0	0.0870083	10.4951	4.47361	8.67822	10.3465	90.2807	11.5172	75.5051	52.5226	36.3003	48.9266	3.19576	295.949
11	Saitama	25	Rubber products	7.71979	0	0.0167009	0	6.89849	0.133214	0.121067	1.86461	0.0829284	1.14704	0.0794045	1.55439	8.41203	0	0.0335353	0	0.0722055	0	0	0.982927	0.415125	0	0.128422	0.954688	32.3739	0	2.23661	0	0.918377	0	3.26579	0.0418777	0.0515137	0	0.029145	2.23619	1.60361	19.0107	17.1396	3.06743	22.513	9.25366	8.1408	1.75266	0.390486	20.8661
11	Saitama	26	Glass and glass products	0.0390265	0	0	0	10.0696	28.2007	0	0	0	12.8599	0	0	0.127578	0	0.374839	0	0	0	0	37.1855	4.5656	0	0	3.97737	0.192188	4.53993	0.0614242	0	0.577691	0	0	0	0	0	0	0.284033	0.47692	0.529905	0.0722659	0	2.69644	0.154993	5.25729	2.51047	0.132262	1.36608
11	Saitama	27	Cement and cement products	0	0	0	0	0	0	0	0	0	0	0	0	0	0	0	0	0	0	0	0	0	0	0	0	0	0	122.424	0	0.0744271	0	0	0	0	0	0	0	0	0	0	0	0	0	0	0	0	0
11	Saitama	28	Pottery, china and earthenware	0	0	0	0	0.0122072	0	0	0	0	0.0116249	0	0	0	0	0.00033987	0	0	0	0	0.000383141	0	0	0	0.000483774	0	0	0.000612632	0.0010575	0	0	0	0	0	0	0	0	0.000792784	0.000480469	0	0	0	0.0149434	0.00099403	0.000214008	0	0.013625
11	Saitama	29	Other ceramic, stone and clay products	0.656838	0	0	0	2.4969	0	0	0	0	1.08983	0.188609	0	0.238579	0	5.60779	0	0	0	0	0.933895	0.556824	0	6.83286	0.907065	0.239602	2.70017	192.862	0.436212	23.6839	0	2.8208	2.22816	0	0.045455	0.49844	1.59348	5.79716	47.656	7.09495	5.6408	0.487985	5.55542	2.23654	2.1668	0.0618346	3.77876
11	Saitama	30	Pig iron and crude steel	0	0	0	0	0	0	0	0	0	0	0	0	0	0	0	0	0	0	0	0	0	0	0	0	0	0	0	0	0	0	0	0	0	0	0	0	0	0	0	0	0	0	0	0	0	0
11	Saitama	31	steel products	0.0458061	0	0	0	0	0	0	0	0.164841	21.6832	0	0	0	0	0	0	0	0	0	0	0	0	0	2.24876	2.68809	0	6.12804	0	0.104315	0	488.876	5.79367	318.279	0	0.191179	35.9045	150.811	49.0781	53.182	16.2856	9.21381	37.3085	5.77577	6.90054	0.989643	8.4011
11	Saitama	32	Cast and forged steel products	0	0	0	0	0	0	0	0	0	0.879574	0	0	0	0	0	0	0	0	0	0	0	0	0	0	0	0	0	0	0.050302	0	0	0	0	0	0.0670466	10.0313	7.73795	92.8106	47.1182	49.3952	12.2091	18.3635	3.66653	0.631503	0.0748579	1.0309
11	Saitama	33	Other iron or steel products	0	0	0	0	0	0	0	0	0	168.122	0	0	0	0	0.164573	0	0	0	0	0.278289	0	0	0	0.234254	0	0	3.11483	0	1.07307	0	0	2.67166	0	0	0.357569	270.509	523.714	205.317	138.034	25.7362	38.7526	52.7726	0.601666	12.8498	5.98842	75.1157
11	Saitama	34	Non-ferrous metals	0	0	0	0	0	0	0	0	0	0.577446	0.00999347	0	-7.12119	0	11.0411	0	0.290798	0	0	31.3073	0	0	0	0.600762	-0.0158692	0.962964	0	0.052529	0.913652	0	94.3595	0.274067	-0.207464	17.6177	124.64	-1.04131	19.5325	-1.45585	2.45248	1.49439	-0.452479	6.37342	0.975185	75.9649	0.0327631	3.01738
11	Saitama	35	Non-ferrous metal products	0	0	0	0	17.8684	0.953426	0	0	0.23741	43.182	0	1.33499	17.4327	0	0.720046	0	0	0	0	4.70798	0.314586	0	0	12.709	8.52811	0.293365	0	0	1.22068	0	0	0	0	1.12994	126.783	70.3404	125.129	161.645	92.9947	85.4076	46.1328	182.64	147.521	275.755	5.03055	678.828
11	Saitama	36	Metal products for construction and architecture	0.0924791	0	0	0	0	0	0	0	0	0.920648	0	0	0	0	0	0	0	0	0	0	0	0	0	0	0	0	0	0	0	0	0	0	0	0	0	15.4804	2.35445	0.570768	0	0.476515	0	0	0	0	0	0.202321
11	Saitama	37	Other metal products	3.32573	0	0.0535616	0	133.448	78.8957	0	19.2369	16.4896	143.347	0.827643	8.47467	16.6434	0	5.48513	0	1.08067	0	0	111.666	11.199	0.366255	1.85338	8.57303	57.4232	3.76846	7.56081	0	19.4252	0	0	3.76058	0.16521	0	2.80414	220.172	504.511	268.054	195.583	99.1692	163.484	85.6898	62.8334	12.3932	4.48753	122.432
11	Saitama	38	General industrial machinery	0	0	0	0	0	0	0	0	0	0.866637	0	0	0	0	0	0	0	0	0	0	0	0	0	16.9179	0	0.0563075	0.124559	0	1.0363	0	0	0.60404	0.849176	0	0.12011	0.460781	3.46552	1522.85	202.597	43.1229	55.7379	16.6057	15.7136	0.261069	1.00578	3.05876
11	Saitama	39	Special industrial machinery	0	0	0	0	0	0	0	0	0	0	0	0	0	0	0	0	0	0	0	0	0	0	0	0	0	0	0	0	0	0	0	0	0	0	0	0	0	3.88209	1595.92	0	0.219048	0	0.125493	0.97264	0	0
11	Saitama	40	Other general machines	0	0	0	0	0	0	0	0	0	6.92356	0	0	0	0	0	0	0	0	0	0.422575	0	0	0	1.17384	0	0.0610894	0	0	0.34218	0	0	0.468099	0	0	0.13031	0.874848	2.62314	165.441	120.673	333.911	13.2999	15.0038	10.4152	0.944135	0.727461	9.079
11	Saitama	41	Machinery for office and service industry	0	0	0	0	0	0	0	0	0	0	0	0	0	0	0	0	0	0	0	0	0	0	0	0	0	0	0	0	0	0	0	0	0	0	0	0	0	0	0	0	331.288	0	0	0	0	0
11	Saitama	42	Industrial electric equipment	0.97842	0	0	0	0	0	0	0	0	0.171889	0	0	0	0	0	0	0	0	0	0	0	0	0	0	0	0	0	0	0	0	0	0	0	0	0	0	0	64.5782	79.5573	0.667255	58.2373	281.682	90.723	13.9548	2.04805	61.5718
11	Saitama	43	Applied electric equipment and electric mesuring instruments	0	0	0	0	0	0	0	0	0	0	0	0	0	0	0	0	0	0	0	0	0	0	0	0	0	0	0	0	0	0	0	0	0	0	0	0	0	9.40673	39.421	2.61179	6.93419	52.8026	362.356	0	0	9.02434
11	Saitama	44	Other electric equipment	0.448004	0	0.0081171	0	0	0	0	0	0	0.334498	0	0	0	0	0	0	0	0	0	0.220491	0	0	0	0	0	0	0	0	0	0	0	0	0	0	0	0	0.68435	2.16593	6.22182	1.29849	5.45018	13.888	8.27085	50.6384	0.474469	54.3694
11	Saitama	45	Household electric and electric applications	0	0	0	0	0	0	0	0	0	0	0	0	0	0	0	0	0	0	0	0	0	0	0	0	0	0	0	0	0	0	0	0	0	0	0	0	0	0	0	0	0	0	0	0	6.07133	0
11	Saitama	46	Communication equipment	0	0	0	0	0	0	0	0	0	0	0	0	0.81073	0	0	0	0	0	0	0	0.236522	0	0	0	0	0	0	0	0	0	0	0	0	0	0	0	0	4.59194	0.861062	0	0	0.123119	9.97516	0.102266	0	172.537
11	Saitama	47	Electric computing equipment and accessory equipment	0	0	0	0	0	0	0	0	0	0	0	0	0	0	0	0	0	0	0	0	0	0	0	0	0	0	0	0	0	0	0	0	0	0	0	0	0	0	4.05752	0	0	0	0	0	0	0.785583
11	Saitama	48	Semiconductor devices and integrated circuits	0	0	0	0	0	0	0	0	0	0	0	0	0	0	0	0	0	0	0	0	0	0	0	0	0	0	0	0	0	0	0	0	0	0	0	0	0.711962	2.58892	16.8294	4.56726	278.861	173.171	1144.97	8.62111	10.3659	1487.25
11	Saitama	49	Other electrical equipment	0	0	0	0	0	0	0	0	0	0	0	0.141467	6.85605	0	0	0	0	0	0	0	0	0	0	0	0	0	0	0	0	0	0	0	0	0	0.106101	0	0.284775	20.3654	42.784	1.17072	173.576	121.84	1042.05	3.22868	5.8639	1361.66
11	Saitama	50	Passenger motor cars	0	0	0	0	0	0	0	0	0	0	0	0	0	0	0	0	0	0	0	0	0	0	0	0	0	0	0	0	0	0	0	0	0	0	0	0	0	0	0	0	0	0	0	0	0	0
11	Saitama	51	Other cars	0	0	0	0	0	0	0	0	0	0	0	0	0	0	0	0	0	0	0	0	0	0	0	0	0	0	0	0	0	0	0	0	0	0	0	0	0	0	0	0	0	0	0	0	0	0
11	Saitama	52	Motor vheicle parts and accessories	0	0	0	0	0	0	0	0	0	0	0	0	0	0	0	0	0	0	0	0	0	0	0	0	0	0	0	0	0	0	0	0	0	0	0	0	0	0	0.687721	0	0	0	0	0	0	0
11	Saitama	53	Other transportation equipment	2.25719	0	0	0	0	0	0	0	0	0	0	0	0	0	0	0	0	0	0	0	0	0	0	0	0	0	0	0	0	0	0	0	0	0	0	0	0	0	0	0	0	0	0	0	0	0
11	Saitama	54	Precision instruments	6.59612	0	0	0	0	0	0.0554464	0.0514431	0.0632995	0	0.0909145	0.17797	0.191669	0	0	0	0	0	0	0.259709	0.111835	0	0	0.983767	0	0	0	0	0	0	0	0	0	0	0.0667394	0.128017	0.179128	22.255	61.2335	0.339877	19.1118	10.0129	16.6765	0.0483545	0.0745149	20.0746
11	Saitama	55	Miscellaneous manufacturing products	4.61697	0	0.0557679	0	10.1162	1.58162	0.161708	106.923	1.41535	21.96	0.176766	1.55713	3.35399	0	0	0	0.2679	0	0	2.18814	0	0	0.714714	1.06264	0.631569	2.2508	0.807411	0.232285	5.64656	0	0	2.33065	0.114677	0	1.0381	1.99124	1.39312	17.8359	5.62038	0.881102	0	0.905495	3.82104	0.235041	0.07244	15.4005
11	Saitama	56	Reuse and recycling	0	0	0	0	0	9.60402	0	0	0	0	0.393065	0	0	0	0.357549	0	0	0	0	0	0	0	0	10.4696	0.0480131	0.582699	0.736572	0.0317858	0.0333049	0	1.95954	8.67475	0.784618	5.57445	12.9623	0	0	0	0	0	0	0	0	0	0	0
11	Saitama	57	Building construction and repair of construction	0	0	0	0	0	0	0	0	0	0	0	0	0	0	0	0	0	0	0	0	0	0	0	0	0	0	0	0	0	0	0	0	0	0	0	0	0	0	0	0	0	0	0	0	0	0
11	Saitama	58	Public construction	0	0	0	0	0	0	0	0	0	0	0	0	0	0	0	0	0	0	0	0	0	0	0	0	0	0	0	0	0	0	0	0	0	0	0	0	0	0	0	0	0	0	0	0	0	0
11	Saitama	59	Other civil enginnering and construction	0	0	0	0	0	0	0	0	0	0	0	0	0	0	0	0	0	0	0	0	0	0	0	0	0	0	0	0	0	0	0	0	0	0	0	0	0	0	0	0	0	0	0	0	0	0
11	Saitama	60	Electricity	0.431709	0	0.0240029	0	15.2819	1.06112	0.190102	0.638039	0.313088	0.893997	0.424126	1.10033	10.5737	0.00412214	0.483417	0	0.179671	0.00145214	0	3.24708	0.278671	0.303768	0.192835	3.27871	2.01643	0.228024	1.03477	0.0143251	0.399634	0	5.3539	1.03487	0.585664	0.477208	0.265082	0.87783	3.26373	2.68275	2.76282	1.27991	0.738167	1.25427	0.587008	0.306208	0.209409	2.20136
11	Saitama	61	Gas supply and heat supply	0.00854197	0	0	0	16.3656	1.61471	0.156172	0.0949317	0.0122959	0.195585	0.0441503	0.872909	0.279238	0	0.0820434	0	0.0535301	0	0	1.43778	0.518659	0	0.0214214	1.7411	0.413642	0.594082	0.241997	0.0255275	0.0607898	0	4.41304	0.302701	0.0171855	0.0452212	0.106954	0.42896	1.5136	0.653725	0.438929	0.203565	0.32365	0.517347	0.190874	0.345187	0.0144745	1.42026
11	Saitama	62	Water supply and waste management services	2.70508	0	0.0435658	0	375.19	42.5111	5.87415	2.75431	1.73061	7.48044	4.86766	15.0026	66.8133	0	4.8114	0	3.20204	0.0882951	0	85.896	25.6072	1.11714	1.005	18.927	9.78539	2.24542	58.1865	0.163315	9.24046	0	36.9163	1.09242	1.74692	2.30878	1.90069	9.91665	18.3651	59.2376	49.2555	15.0999	18.757	16.1148	11.0658	3.02962	2.37678	24.2566
11	Saitama	63	Commerce	134.974	0	0.345741	0	3395.49	157.779	13.6101	220.642	37.5611	226.284	37.2602	448.164	1754.27	0.241102	23.4782	0	10.0861	0.467143	0	534.849	86.2761	2.29254	22.2354	273.162	152.032	13.7999	243.154	0.733135	27.5993	0	275.276	23.8543	188.533	5.79242	28.2299	123.239	243.794	443.554	536.719	144.881	338.043	234.055	488.856	104.572	13.1873	827.743
11	Saitama	64	Financial and insurance	58.3315	0	0.342769	0	207.372	21.4999	9.60028	112.796	6.55021	75.477	8.03738	132.902	334.365	0.0448179	5.81909	0	1.14514	0.0315769	0	48.6354	11.5271	2.82329	0.718835	41.192	39.7007	8.84606	173.805	0.545124	11.3011	0	48.9317	5.58674	21.674	10.3992	3.26276	30.9274	36.2329	109.464	79.484	83.2642	31.464	47.9074	37.1725	5.20071	1.79109	82.0715
11	Saitama	65	Real estate agencies and rental services	34.842	0	0.0757536	0	164.898	14.7033	2.9654	62.1588	1.37924	58.6192	7.02334	113.514	193.249	0	5.32395	0	0.87338	0	0	34.6389	21.1557	0.518004	4.66007	149.831	38.4628	2.60294	159.579	0.283977	4.85995	0	40.8489	9.87757	7.2435	2.49555	1.98298	18.5113	56.239	94.1874	96.7762	58.1228	19.8022	78.2971	62.3959	23.5623	2.21401	71.2708
11	Saitama	66	House rent	0	0	0	0	0	0	0	0	0	0	0	0	0	0	0	0	0	0	0	0	0	0	0	0	0	0	0	0	0	0	0	0	0	0	0	0	0	0	0	0	0	0	0	0	0	0
11	Saitama	67	Transport	351.685	0	9.47564	0	1125.23	113.188	9.54433	69.5536	47.5467	100.475	12.662	158.374	1165.16	0	18.987	0	3.96738	0	0	271.303	69.478	10.0943	4.14169	134.675	47.7441	16.3202	1110.07	0.498544	186.904	0	319.401	11.2049	54.7631	7.9432	18.7293	128.612	203.88	276.118	216.62	126.584	133.842	102.941	237.183	26.2318	3.96461	506.307
11	Saitama	68	Communication	61.1065	0	0.404485	0	69.9726	4.30182	1.98485	42.188	0.411995	55.9889	2.29296	62.8404	387.664	0	3.24882	0	0.448404	0	0	67.3327	174.877	5.42537	5.74208	66.698	68.2418	4.83643	11.4871	0	3.91078	0	24.7058	7.33382	1.72749	7.3978	7.05874	52.0762	55.0879	192.721	88.3749	57.8845	54.8601	76.2532	70.9905	9.36302	1.45498	112.5
11	Saitama	69	Broadcasting	0.00788188	0	0	0	0.112358	0.00911276	0	0.0138309	0	0.0313863	0	0.0478488	0.25766	0	0	0	0	0	0	0.0698251	0	0.0175773	0	0.0783686	0.0258765	0.00280396	0.0248108	0	0	0	0.060928	0	0.0105717	0.00981805	0	0.0114728	0.0321066	0.0778333	0.0510825	0.0304596	0.0439176	0.0313029	0.0503211	0.00433351	0	0.074722
11	Saitama	70	Information services	1.79847	0	0.00965489	0	7.06458	0.924145	0.0643905	0.410397	0.124648	3.31557	0.119351	3.22598	11.7923	0	0.096935	0	0.0473082	0	0	2.49587	3.62803	0.00330102	0.0965139	4.06207	1.50162	0.298573	1.75429	0.0144773	0.207312	0	1.53327	0.271149	0.702818	0.165945	0.249364	0.898467	3.07512	6.56674	8.05426	2.86588	3.42446	7.08088	14.3342	2.57334	0.0376238	15.2332
11	Saitama	71	﻿Internet based services	0.00441051	0	0	0	0.0204337	0.00382446	0.000521358	0.00822316	0.000991999	0.0211305	0.000569908	0.0172922	0.075995	0	0.000722076	0	0	0	0	0.00651207	0.0501251	0.000204913	0.000460858	0.0370011	0.00542994	0.00156903	0.0112803	0	0.00109857	0	0.00497201	0.00240454	0.000369728	0.000343371	0.002301	0.0140435	0.0182468	0.0364081	0.0216936	0.0106528	0.0132092	0.0302886	0.017775	0.00318272	0.000233552	0.081414
11	Saitama	72	Image information production and distribution industry	0.0505278	0	0.00321996	0	0.408576	0.00906493	0.0120829	0.184973	0.00689711	0.143966	0.00630385	0.262669	1.17142	0	0.018256	0	0.00272968	0	0	0.248679	0.0542811	0.000647593	0.00873881	0.12235	0.174465	0.0189049	0.37295	0.000473359	0.026783	0	0.0920347	0.00854905	0.01519	0.00325551	0.00528867	0.0646714	0.244859	0.167754	0.154863	0.0729438	0.161157	0.245649	0.404349	0.0574769	0.00738104	0.495533
11	Saitama	73	Public administration	0	0	0	0	0	0	0	0	0	0	0	0	0	0	0	0	0	0	0	0	0	0	0	0	0	0	0	0	0	0	0	0	0	0	0	0	0	0	0	0	0	0	0	0	0	0
11	Saitama	74	Education and Research	6.39759	0	0.213995	0	437.656	40.8036	3.989	27.5107	1.36619	102.323	1.67151	77.9607	29.4939	0.703507	58.8076	0	17.6228	0.743493	0	1382.92	1064.95	0.522607	6.22945	739.385	397.855	87.2105	172.505	1.9482	23.7352	0	148.544	8.9688	0.282885	34.6789	34.3037	67.7444	61.4998	617.528	1136.35	92.4643	952.29	1133.63	1941.65	385.565	26.7447	2799.77
11	Saitama	75	Medical service, health and social security and nursing care	17.4353	0	0.598546	0	235.463	44.56	1.73558	73.5354	2.64185	35.628	4.74299	81.705	98.9936	0	8.81378	0	1.15013	0	0	164.394	117.272	0.682145	6.1367	128.878	103.937	7.18192	176.204	0.498615	2.08977	0	44.9258	8.0046	27.0777	1.7146	2.08907	25.3787	80.3674	299.038	197.11	187.952	251.565	69.2443	77.3339	8.07246	1.55497	301.137
11	Saitama	76	Advertising and survery	2.4797	0	0.00693741	0	12.4078	4.97762	0.0258636	0.306618	0.057413	3.24229	0.637299	6.98257	1.31874	0.00285084	0.153233	0	0.0085696	0	0	46.5956	4.07769	0.00508266	0	4.6682	2.60203	0.0778364	0.337192	0.0123839	0.150519	0	0.845664	0.109344	0.0641951	0.00851699	0.0518855	0.474401	0.649879	2.17468	1.95189	1.69696	1.90235	1.74846	3.21575	0.515017	0.131309	6.32079
11	Saitama	77	Giids rental and leasing services	6.25387	0	0.0729869	0	53.9156	2.65933	0.846547	2.85807	0.841165	12.6497	0.790428	17.0329	85.1901	0	1.58499	0	0.132455	0	0	9.77838	1.46242	0.268027	3.97021	29.6691	11.6537	1.48172	24.226	0.0878239	1.88289	0	8.4897	1.65392	2.75155	0.325234	1.52845	6.73231	22.968	79.0683	60.7567	34.05	27.406	58.077	45.2614	8.38755	0.663647	107.905
11	Saitama	78	Other business services	27.286	0	0.417364	0	388.643	18.1779	3.71708	44.8063	6.74361	87.2699	4.08684	152.42	1374.08	0.0571701	13.9678	0	1.0884	0.0805594	0	111.122	57.3051	2.03853	6.41865	247.784	136.997	24.5844	213.362	0.22351	12.9846	0	40.277	18.788	5.88505	8.88149	8.39336	51.6924	92.2052	265.217	203.669	71.299	134.312	155.864	345.054	43.5737	5.80862	295.608
11	Saitama	79	Personal services	21.7354	0	0	0	9.43892	0.332843	0	1.55762	0.155401	1.43298	0	2.33024	17.4888	0	0.125685	0	0	0	0	3.18795	0.960948	0	0	3.75692	1.29956	0.128018	2.71864	0	0.0409753	0	1.66905	0.156951	0.579194	0	0.109231	0.733327	2.05222	3.64241	2.99858	1.39067	2.08532	4.47807	2.84886	0.910118	0	5.87832
11	Saitama	80	Activities not elsewhere classified	233.095	0	0.647553	0	991.708	62.526	6.02834	132.492	133.694	50.8733	31.2741	643.294	1591.28	0	10.9498	0	4.9117	0.138147	0	50.6098	68.4698	2.09746	22.0141	233.205	80.2827	10.7627	1126.02	2.12937	37.3045	0	170.855	57.9422	166.728	14.8399	14.7502	37.6483	229.714	800.872	445.268	186.379	246.134	105.108	158.725	76.7908	3.71874	246.346
12	Chiba	1	Agriculture, forestry and fishery	126.441	0	0	0	3700.82	102.653	9.55163	0.39097	107.601	0	0.403057	0.22543	0	0	0.583629	0	0.349062	0	0	5.48279	7.57874	0	3.16621	0	626.323	0	0	0	1.8393	0	0	0	0	0	0.0845371	0	0	0	0	0	0	0	0	0	0	0
12	Chiba	2	Metallic ores	0	0	0	0	0	0	0	0	0	0	0	0	0	0	0	0	0	0	0	0	0	0	0	0	0	0	0	0	0	0	0	0	0	0	0	0	0	0	0	0	0	0	0	0	0	0
12	Chiba	3	Non-metallic ores	0	0	1.16914	0	0	0	0	0	0	0	3.07982	0	0	0	10.4057	0	0.182153	0	0	3.00416	0.739224	-2.26874	1.21488	0	4.05564	291.599	99.274	2.84287	49.3145	0	0	1.9016	0	0.181034	0.110286	0.846185	1.62803	0	0	5.61643	0	0	0	0	0	0
12	Chiba	4	Coal mining, crude petroleum and natural gas	0	0	0	0	0	0	0	0	0	0	0.0124106	0.00117554	0	0.00217992	0.000845392	0	0.00109214	0	0	0.00324028	0.000246233	1.22785	0	0	0.00095359	0.00695758	0.0518113	0.000631299	0.00848885	0	0.0294383	0.000211139	0	0.00108543	0.000146943	0.000281861	0	0	0	0.000498883	0	0	0	0	0	0
12	Chiba	5	Food and Tobacco	43.4752	0	0	0	9898.64	274.53	0	8.56931	0.0684697	0	0.393361	0	0	0	0.0830651	0	0.0596164	0	0	44.1984	9.5566	0	0	0.118236	0	0	0	0	0.324967	0	0	0	0	0	0	0	0	0	0	0	0	0	0	0	0	0
12	Chiba	6	Beverage	6.66958	0	0	0	22.5807	101.622	0	0	0	0	0	0	0	0	0	0	0.0746363	0	0	0	0.0757235	0	0	0	0	0	0	0	0	0	0	0	0	0	0	0	0	0	0	0	0	0	0	0	0	0
12	Chiba	7	Textile products	0.767593	0	0	0	0	0.0145486	6.9098	103.075	0	1.70369	0.123575	0.789374	1.35748	0	0	0	0	0	0	0.0123863	0	0	0	0.469186	7.15731	0.0313358	0	0	0.186268	0	0	0	0	0	0.0381958	0.0183164	0.102517	0.0621308	1.30486	0	0	0	0	0.00691848	0.117276	0.18353
12	Chiba	8	Wearing aparel and other textile products	11.0207	0	0.0341607	0	29.7568	0.700668	2.73106	13.6409	0.759275	2.27918	0.243626	5.58667	4.25572	0	0.176386	0	0.0562637	0	0	3.44661	0.656458	0	1.31339	0.809001	1.7317	0.45514	1.97832	0	1.02231	0	2.19775	0.220264	0.69242	0.0279591	0.323621	0.751443	2.76579	4.18361	2.45219	3.35397	2.32622	7.26507	4.01242	0.56767	0.171154	10.6394
12	Chiba	9	Timber and wooden products	1.44319	0	0	0	6.96676	0.303375	0	0.498819	56.8223	113.958	13.715	44.2706	0.643337	0	0	0	0	0	0	0.677998	0	0	0	0.733779	0.0269206	1.15517	0.0516238	0.142577	0.578888	0	0	0.500693	0	0	1.09516	1.33681	2.90599	0.647792	0.759196	0.25351	3.21656	0.67303	0.753863	0.198368	0.0277898	0.861089
12	Chiba	10	Furniture and fixtures	0.21056	0	0	0	17.5592	0.608605	0.199119	3.5101	0.151547	117.28	0.217661	5.32605	9.40708	0	0.275778	0	0.263903	0	0	7.35771	1.07099	0	0	5.75732	1.64178	0.187265	1.82271	0.057205	1.0789	0	2.17021	0.459175	0	0	0.239674	0.306489	1.50099	1.94932	4.28886	1.4918	1.64253	2.5784	4.03289	0.463068	0.267597	24.7984
12	Chiba	11	Pulp, paper, paperboard, building paper	0.0212208	0	0	0	1.17978	0.0245347	0.17392	0.0496501	0.351286	2.66184	31.5666	96.8768	94.0902	0	0.296465	0	0	0.0374034	0	2.88256	0.0269843	0	0	0.870357	0.24384	0.120788	0	0	0.38661	0	0.10936	0	0.0853877	0	0.04831	0	0.0216106	0.0261943	0	0.0820078	0	1.78389	0.0270964	0.0233346	0.0179794	0.77376
12	Chiba	12	Paper products	16.3661	0	0	0	546.81	50.5526	0.872658	6.4772	0.17581	24.2365	0	19.6072	25.3753	0.101848	1.35081	0	0.204103	0	0	337.099	15.4271	0	0	9.209	2.47267	6.54635	3.84459	0.57515	0.973489	0	0	0	0.32763	0	0.0617879	0	8.04314	2.61317	0.226159	2.30752	2.81287	3.93436	4.05474	1.34301	0.620879	14.0132
12	Chiba	13	Publishing, printing	0.198991	0	0.00480719	0	140.636	2.91418	0.125453	6.24651	0.143221	4.11607	0.0114279	46.7996	1881.77	0	0.366807	0	0	0	0	47.3357	0.871572	0.0164358	0.0369649	0.412197	0.671441	1.32142	0.278395	0	0.226582	0	0.797599	0.313406	0.0593109	0.0137707	0.218117	0.450567	4.99861	4.33944	3.86898	1.76586	13.4038	1.72693	4.46065	0.170188	0.636921	25.0402
12	Chiba	14	Chemical fertilizer	19.0318	0	0	0	0	0.10187	0	0	0	0	0	0	0	1.32254	4.53911	0	0.717809	0.0776508	0	7.89234	2.29684	0	0	0	0	0	0	0	0.0501636	0	5.22179	0	0	0	0	0	0	0	0	0	0	0	0	0.0484435	0	0
12	Chiba	15	Basic inorganic chemical products	0	0	0	0	89.1794	2.67884	4.43091	0.0451757	0	0.384437	1.15765	3.12575	0.336636	0.772855	68.5834	0	7.88919	0.13613	0	311.085	47.0426	0	0	17.0863	60.0302	15.0017	2.43117	0	0.219856	0	23.682	0.252638	0.10359	0.0962056	0.117217	2.58567	2.1236	1.62069	1.64466	2.18877	0.946753	2.40273	4.83227	2.08071	0	6.25178
12	Chiba	16	Basic organic chemical products	0	0	0	0	0	0	0	0	0	0	0	0	4.58264	0	0	0	5.43568	0	0	73.9955	1.83829	0	0	0	0.215732	0	0	0	0	0	0	0	0	0	0	0	0	0.324448	0	0	0	0	0	0	0	0
12	Chiba	17	Organic chemical products	27.4453	0	0	0	257.696	45.6931	81.2074	0.428091	2.3704	2.18579	10.5918	4.44301	30.3051	0	38.3425	0	423.329	27.4123	0	3436.32	723.349	0	1.22359	479.368	621.716	5.59779	0	0	2.08338	0	0	0	0	0.227914	4.16536	0.532656	3.72659	16.713	0.338805	4.2425	60.3542	8.23547	1.86903	1.00597	6.20086	6.67148
12	Chiba	18	Synthetic resins	0	0	0	0	0	0	1.73104	0	0	7.65363	8.51504	22.2249	4.78713	0	0	0	0	0	0	1528.65	0	0	0	2175.17	0	0	0	0	2.18852	0	0	0	0	0	1.25016	0	0	0	0	2.12219	7.34362	67.6091	0	2.71733	2.79162	60.8708
12	Chiba	19	Synthetic fibers	0	0	0	0	0	0	0	0	0	0	0	0	0	0	0	0	0	0	0	0	0	0	0	0	0	0	0	0	0	0	0	0	0	0	0	0	0	0	0	0	0	0	0	0	0	0
12	Chiba	20	Final chemical products	5.17734	0	0.18481	0	37.0123	2.05485	3.06916	4.24874	7.56387	17.0779	4.83274	79.4357	1372.34	0	13.8993	0	2.56654	0	0	674.447	44.7581	0.574424	4.52167	26.2191	9.25977	0.549799	3.77028	0	6.0272	0	1.79201	0.674055	0.207289	0	0.762308	1.79967	11.4892	4.76923	4.43576	3.38442	35.3065	5.88211	4.9828	2.67659	0.130942	14.0316
12	Chiba	21	Medicaments	35.8496	0	0	0	2.0718	0	0	0.0283369	0	0	0	0	0	0	0	0	0	0	0	9.72796	58.2458	0	0	0	0	0	0	0	0	0	0	0	0	0	0	0	0	0	0	0	0	0	0	0	0	0
12	Chiba	22	Petroleum refinery products	116.706	0	0.108206	0	295.134	2.5893	9.56967	1.60108	0.895495	4.95451	3.34403	9.5674	296.372	0.31126	24.5523	0	13.0991	0	0	66.1338	2.37319	24.4171	93.6057	3.40201	8.78222	23.9016	11.3579	1.08168	11.6171	0	71.172	1.62797	0	1.08489	2.83248	7.96862	26.1014	11.9793	4.14703	2.88494	1.10923	4.28249	3.81287	7.38796	0	5.44399
12	Chiba	23	Coal products	0	0	0	0	0	0	0	0	0	0	0.339199	0	0	0	1.33705	0	1.64505	0	0	0.215326	0	0	0	0	0	0	0	0	4.6081	0	60.8762	21.4671	0	2.72492	0.996011	0.318418	0	0	0.810143	0.281794	0	0	0	0	0	0.319053
12	Chiba	24	Plastic products	8.84765	0	0	0	180.603	22.006	0.328114	9.21969	1.39132	22.7232	1.65244	77.0319	684.27	0.0930002	2.0125	0	0.046593	0	0	101.873	16.1669	0	0	500.937	35.0274	1.34894	0.351061	0	0.592614	0	0	0	0	0.046307	5.58561	2.38091	4.61866	5.50653	48.0485	6.12963	40.1848	27.9532	19.3195	26.0393	1.70083	157.508
12	Chiba	25	Rubber products	7.13199	0	0.0154292	0	6.37323	0.123071	0.111849	1.72263	0.0766141	1.05971	0.0733586	1.43603	7.77153	0	0.0309819	0	0.0667077	0	0	0.908086	0.383517	0	0.118643	0.881997	29.9089	0	2.06632	0	0.848451	0	3.01713	0.038689	0.0475913	0	0.0269259	2.06593	1.48151	17.5632	15.8345	2.83387	20.7989	8.54907	7.52095	1.61921	0.360754	19.2773
12	Chiba	26	Glass and glass products	0.110069	0	0	0	28.4	79.5361	0	0	0	36.2696	0	0	0.359817	0	1.05718	0	0	0	0	104.877	12.8767	0	0	11.2176	0.54204	12.8042	0.173239	0	1.6293	0	0	0	0	0	0	0.801078	1.34509	1.49452	0.203816	0	7.60493	0.437138	14.8275	7.08044	0.373027	3.85284
12	Chiba	27	Cement and cement products	0	0	0	0	0	0	0	0	0	0	0	0	0	0	0	0	0	0	0	0	0	0	0	0	0	0	50.3347	0	0.0306008	0	0	0	0	0	0	0	0	0	0	0	0	0	0	0	0	0
12	Chiba	28	Pottery, china and earthenware	0	0	0	0	0	0	0	0	0	0	0	0	0	0	0	0	0	0	0	0	0	0	0	0	0	0	0	0	0	0	0	0	0	0	0	0	0	0	0	0	0	0	0	0	0	0
12	Chiba	29	Other ceramic, stone and clay products	0.977312	0	0	0	3.71515	0	0	0	0	1.62156	0.280632	0	0.354983	0	8.34385	0	0	0	0	1.38955	0.8285	0	10.1666	1.34962	0.356505	4.01759	286.96	0.649041	35.2394	0	4.19708	3.31529	0	0.0676326	0.741631	2.37095	8.62562	70.9074	10.5566	8.39296	0.726074	8.26592	3.32776	3.22399	0.0920039	5.62243
12	Chiba	30	Pig iron and crude steel	0	0	0	0	0	0	0	0	0	0	0	0	0	0	1.34964	0	0	0	0	0	0	0	0	0	0	0	0	0	0	0	-1804.22	523.312	-448.846	0	0	-44.9983	-469.081	-149.776	-320.566	-24.8891	-18.0865	-42.9713	-0.493419	-2.54951	-2.61922	-21.9804
12	Chiba	31	steel products	0.527321	0	0	0	0	0	0	0	1.89766	249.618	0	0	0	0	0	0	0	0	0	0	0	0	0	25.8877	30.9454	0	70.5462	0	1.20087	0	5627.95	66.697	3664.03	0	2.20086	413.333	1736.14	564.989	612.232	187.481	106.07	429.496	66.4908	79.4392	11.3928	96.7137
12	Chiba	32	Cast and forged steel products	0	0	0	0	0	0	0	0	0	0.65772	0	0	0	0	0	0	0	0	0	0	0	0	0	0	0	0	0	0	0.0376144	0	0	0	0	0	0.0501355	7.50111	5.78621	69.4011	35.2336	36.9363	9.1296	13.7317	2.74173	0.47222	0.0559766	0.770879
12	Chiba	33	Other iron or steel products	0	0	0	0	0	0	0	0	0	355.973	0	0	0	0	0.348459	0	0	0	0	0.589235	0	0	0	0.495999	0	0	6.5952	0	2.27207	0	0	5.65686	0	0	0.7571	572.764	1108.89	434.729	292.266	54.4926	82.0529	111.738	1.27394	27.2076	12.6796	159.047
12	Chiba	34	Non-ferrous metals	0	0	0	0	0	0	0	0	0	0.576474	0.00997664	0	-7.1092	0	11.0225	0	0.290308	0	0	31.2545	0	0	0	0.59975	-0.0158425	0.961342	0	0.0524405	0.912114	0	94.2006	0.273606	-0.207115	17.5881	124.43	-1.03956	19.4996	-1.45339	2.44835	1.49188	-0.451717	6.36268	0.973543	75.837	0.032708	3.01229
12	Chiba	35	Non-ferrous metal products	0	0	0	0	6.76986	0.361228	0	0	0.0899486	16.3605	0	0.505792	6.60479	0	0.272807	0	0	0	0	1.78373	0.119188	0	0	4.81511	3.23108	0.111148	0	0	0.462485	0	0	0	0	0.428105	48.0348	26.6501	47.4082	61.2432	35.2333	32.3587	17.4785	69.1975	55.892	104.476	1.90594	257.19
12	Chiba	36	Metal products for construction and architecture	0.189255	0	0	0	0	0	0	0	0	1.88407	0	0	0	0	0	0	0	0	0	0	0	0	0	0	0	0	0	0	0	0	0	0	0	0	0	31.68	4.81828	1.16805	0	0.97517	0	0	0	0	0	0.414042
12	Chiba	37	Other metal products	2.62218	0	0.0422307	0	105.217	62.2054	0	15.1673	13.0012	113.022	0.652556	6.68185	13.1225	0	4.32475	0	0.852052	0	0	88.0434	8.82988	0.288774	1.4613	6.75941	45.2754	2.97124	5.96133	0	15.3158	0	0	2.96503	0.13026	0	2.21093	173.595	397.782	211.347	154.208	78.19	128.899	67.5622	49.541	9.77145	3.5382	96.5316
12	Chiba	38	General industrial machinery	0	0	0	0	0	0	0	0	0	0.580851	0	0	0	0	0	0	0	0	0	0	0	0	0	11.339	0	0.0377393	0.0834839	0	0.694565	0	0	0.40485	0.569149	0	0.0805021	0.308832	2.32272	1020.67	135.788	28.9025	37.3576	11.1297	10.5318	0.174978	0.674108	2.05009
12	Chiba	39	Special industrial machinery	0	0	0	0	0	0	0	0	0	0	0	0	0	0	0	0	0	0	0	0	0	0	0	0	0	0	0	0	0	0	0	0	0	0	0	0	0	3.09619	1272.84	0	0.174703	0	0.100088	0.775738	0	0
12	Chiba	40	Other general machines	0	0	0	0	0	0	0	0	0	2.95337	0	0	0	0	0	0	0	0	0	0.180257	0	0	0	0.500724	0	0.0260588	0	0	0.145963	0	0	0.199676	0	0	0.0555863	0.373182	1.11895	70.5719	51.4753	142.436	5.67332	6.40015	4.4428	0.402738	0.310312	3.87281
12	Chiba	41	Machinery for office and service industry	0	0	0	0	0	0	0	0	0	0	0	0	0	0	0	0	0	0	0	0	0	0	0	0	0	0	0	0	0	0	0	0	0	0	0	0	0	0	0	0	34.8257	0	0	0	0	0
12	Chiba	42	Industrial electric equipment	0.34013	0	0	0	0	0	0	0	0	0.059754	0	0	0	0	0	0	0	0	0	0	0	0	0	0	0	0	0	0	0	0	0	0	0	0	0	0	0	22.4494	27.6567	0.231959	20.2451	97.9215	31.5382	4.85115	0.711969	21.4043
12	Chiba	43	Applied electric equipment and electric mesuring instruments	0	0	0	0	0	0	0	0	0	0	0	0	0	0	0	0	0	0	0	0	0	0	0	0	0	0	0	0	0	0	0	0	0	0	0	0	0	10.5547	44.2319	2.93053	7.78043	59.2465	406.578	0	0	10.1257
12	Chiba	44	Other electric equipment	0.139974	0	0.00253609	0	0	0	0	0	0	0.10451	0	0	0	0	0	0	0	0	0	0.0688898	0	0	0	0	0	0	0	0	0	0	0	0	0	0	0	0	0.213817	0.676719	1.94393	0.405697	1.70285	4.33914	2.58413	15.8214	0.148242	16.9871
12	Chiba	45	Household electric and electric applications	0	0	0	0	0	0	0	0	0	0	0	0	0	0	0	0	0	0	0	0	0	0	0	0	0	0	0	0	0	0	0	0	0	0	0	0	0	0	0	0	0	0	0	0	1.85824	0
12	Chiba	46	Communication equipment	0	0	0	0	0	0	0	0	0	0	0	0	0.022319	0	0	0	0	0	0	0	0.00651132	0	0	0	0	0	0	0	0	0	0	0	0	0	0	0	0	0.126414	0.0237046	0	0	0.00338939	0.274611	0.00281532	0	4.74986
12	Chiba	47	Electric computing equipment and accessory equipment	0	0	0	0	0	0	0	0	0	0	0	0	0	0	0	0	0	0	0	0	0	0	0	0	0	0	0	0	0	0	0	0	0	0	0	0	0	0	3.37137	0	0	0	0	0	0	0.652736
12	Chiba	48	Semiconductor devices and integrated circuits	0	0	0	0	0	0	0	0	0	0	0	0	0	0	0	0	0	0	0	0	0	0	0	0	0	0	0	0	0	0	0	0	0	0	0	0	0.117608	0.427658	2.78002	0.754455	46.0644	28.6057	189.136	1.4241	1.71231	245.676
12	Chiba	49	Other electrical equipment	0	0	0	0	0	0	0	0	0	0	0	0.270425	13.1058	0	0	0	0	0	0	0	0	0	0	0	0	0	0	0	0	0	0	0	0	0	0.20282	0	0.544367	38.93	81.7847	2.23791	331.803	232.906	1991.95	6.17185	11.2093	2602.91
12	Chiba	50	Passenger motor cars	0	0	0	0	0	0	0	0	0	0	0	0	0	0	0	0	0	0	0	0	0	0	0	0	0	0	0	0	0	0	0	0	0	0	0	0	0	0	0	0	0	0	0	0	0	0
12	Chiba	51	Other cars	0	0	0	0	0	0	0	0	0	0	0	0	0	0	0	0	0	0	0	0	0	0	0	0	0	0	0	0	0	0	0	0	0	0	0	0	0	0	0	0	0	0	0	0	0	0
12	Chiba	52	Motor vheicle parts and accessories	0	0	0	0	0	0	0	0	0	0	0	0	0	0	0	0	0	0	0	0	0	0	0	0	0	0	0	0	0	0	0	0	0	0	0	0	0	0	0.026486	0	0	0	0	0	0	0
12	Chiba	53	Other transportation equipment	1.85064	0	0	0	0	0	0	0	0	0	0	0	0	0	0	0	0	0	0	0	0	0	0	0	0	0	0	0	0	0	0	0	0	0	0	0	0	0	0	0	0	0	0	0	0	0
12	Chiba	54	Precision instruments	2.83442	0	0	0	0	0	0.0238259	0.0221056	0.0272004	0	0.0390669	0.0764755	0.0823622	0	0	0	0	0	0	0.1116	0.0480566	0	0	0.422734	0	0	0	0	0	0	0	0	0	0	0.0286786	0.0550101	0.0769729	9.56317	26.3126	0.146048	8.21251	4.30263	7.16603	0.0207784	0.0320198	8.62626
12	Chiba	55	Miscellaneous manufacturing products	3.89535	0	0.0470516	0	8.53504	1.33442	0.136433	90.2112	1.19413	18.5277	0.149138	1.31376	2.82977	0	0	0	0.226028	0	0	1.84614	0	0	0.603006	0.896552	0.532857	1.89901	0.681215	0.19598	4.76402	0	0	1.96637	0.0967534	0	0.875846	1.68001	1.17538	15.0482	4.74193	0.743389	0	0.763969	3.22382	0.198305	0.0611179	12.9935
12	Chiba	56	Reuse and recycling	0	0	0	0	0	0.97751	0	0	0	0	0.0400067	0	0	0	0.0363919	0	0	0	0	0	0	0	0	1.06561	0.00488684	0.0593079	0.0749693	0.0032352	0.00338981	0	0.199445	0.882928	0.0798595	0.567375	1.31932	0	0	0	0	0	0	0	0	0	0	0
12	Chiba	57	Building construction and repair of construction	0	0	0	0	0	0	0	0	0	0	0	0	0	0	0	0	0	0	0	0	0	0	0	0	0	0	0	0	0	0	0	0	0	0	0	0	0	0	0	0	0	0	0	0	0	0
12	Chiba	58	Public construction	0	0	0	0	0	0	0	0	0	0	0	0	0	0	0	0	0	0	0	0	0	0	0	0	0	0	0	0	0	0	0	0	0	0	0	0	0	0	0	0	0	0	0	0	0	0
12	Chiba	59	Other civil enginnering and construction	0	0	0	0	0	0	0	0	0	0	0	0	0	0	0	0	0	0	0	0	0	0	0	0	0	0	0	0	0	0	0	0	0	0	0	0	0	0	0	0	0	0	0	0	0	0
12	Chiba	60	Electricity	79.7434	0	4.43372	0	2822.81	196.006	35.1149	117.856	57.8323	165.135	78.3428	203.249	1953.13	0.761424	89.2948	0	33.1881	0.268234	0	599.786	51.4749	56.1107	35.6197	605.63	372.466	42.1197	191.138	2.64608	73.8186	0	988.95	191.157	108.181	88.1479	48.9648	162.149	602.863	495.546	510.336	236.42	136.351	231.683	108.43	56.5614	38.6812	406.626
12	Chiba	61	Gas supply and heat supply	0.362568	0	0	0	694.646	68.5374	6.62878	4.02942	0.521906	8.30171	1.87398	37.0511	11.8524	0	3.48237	0	2.27211	0	0	61.0274	22.0147	0	0.909243	73.902	17.5573	25.2161	10.2717	1.08353	2.58025	0	187.314	12.8483	0.729448	1.91944	4.53971	18.2074	64.2457	27.7477	18.6306	8.64041	13.7375	21.9591	8.10173	14.6517	0.614377	60.2837
12	Chiba	62	Water supply and waste management services	3.50903	0	0.0565136	0	486.696	55.1453	7.61995	3.5729	2.24495	9.70362	6.31432	19.4614	86.6702	0	6.24135	0	4.15368	0.114536	0	111.424	33.2177	1.44915	1.30369	24.5521	12.6936	2.91276	75.4795	0.211852	11.9867	0	47.8878	1.41709	2.2661	2.99495	2.46557	12.8639	23.8232	76.8429	63.8942	19.5876	24.3316	20.9041	14.3545	3.93002	3.08316	31.4656
12	Chiba	63	Commerce	117.485	0	0.300943	0	2955.54	137.336	11.8466	192.053	32.6943	196.964	32.4324	390.095	1526.97	0.209862	20.4361	0	8.77925	0.406616	0	465.549	75.0973	1.9955	19.3544	237.768	132.333	12.0118	211.648	0.638142	24.0232	0	239.609	20.7635	164.105	5.04189	24.5721	107.271	212.206	386.083	467.176	126.109	294.243	203.728	425.515	91.0223	11.4786	720.493
12	Chiba	64	Financial and insurance	0.224116	0	0.00131696	0	0.796746	0.082605	0.0368854	0.433374	0.0251667	0.289991	0.0308805	0.510624	1.28467	0.000172196	0.0223576	0	0.00439976	0.000121322	0	0.186863	0.0442884	0.0108474	0.00276184	0.158264	0.152535	0.0339876	0.667778	0.00209443	0.0434202	0	0.188001	0.0214649	0.0832739	0.0399549	0.0125359	0.118827	0.139211	0.420572	0.305387	0.319911	0.120888	0.184066	0.142821	0.0199817	0.00688156	0.315328
12	Chiba	65	Real estate agencies and rental services	0	0	0	0	0	0	0	0	0	0	0	0	0	0	0	0	0	0	0	0	0	0	0	0	0	0	0	0	0	0	0	0	0	0	0	0	0	0	0	0	0	0	0	0	0	0
12	Chiba	66	House rent	0	0	0	0	0	0	0	0	0	0	0	0	0	0	0	0	0	0	0	0	0	0	0	0	0	0	0	0	0	0	0	0	0	0	0	0	0	0	0	0	0	0	0	0	0	0
12	Chiba	67	Transport	418.855	0	11.2854	0	1340.14	134.806	11.3672	82.838	56.6279	119.665	15.0804	188.623	1387.7	0	22.6134	0	4.72513	0	0	323.12	82.748	12.0223	4.93273	160.397	56.863	19.4373	1322.09	0.593764	222.602	0	380.405	13.3449	65.2226	9.46031	22.3065	153.176	242.82	328.855	257.994	150.761	159.406	122.602	282.483	31.242	4.72183	603.01
12	Chiba	68	Communication	29.9614	0	0.198325	0	34.3086	2.10925	0.973204	20.6854	0.202007	27.4522	1.12427	30.8116	190.078	0	1.59295	0	0.219859	0	0	33.0143	85.745	2.66014	2.81543	32.7031	33.46	2.37137	5.63229	0	1.91751	0	12.1137	3.59589	0.847014	3.62726	3.46101	25.5338	27.0104	94.4942	43.3316	28.3816	26.8988	37.3881	34.8077	4.59083	0.713397	55.1606
12	Chiba	69	Broadcasting	0.00714006	0	0	0	0.101783	0.00825509	0	0.0125292	0	0.0284323	0	0.0433454	0.23341	0	0	0	0	0	0	0.0632533	0	0.0159229	0	0.0709928	0.023441	0.00254006	0.0224756	0	0	0	0.0551936	0	0.00957668	0.008894	0	0.010393	0.0290849	0.0705078	0.0462747	0.0275928	0.0397842	0.0283567	0.045585	0.00392565	0	0.0676894
12	Chiba	70	Information services	0	0	0	0	0	0	0	0	0	0	0	0	0	0	0	0	0	0	0	0	0	0	0	0	0	0	0	0	0	0	0	0	0	0	0	0	0	0	0	0	0	0	0	0	0	0
12	Chiba	71	﻿Internet based services	0	0	0	0	0	0	0	0	0	0	0	0	0	0	0	0	0	0	0	0	0	0	0	0	0	0	0	0	0	0	0	0	0	0	0	0	0	0	0	0	0	0	0	0	0	0
12	Chiba	72	Image information production and distribution industry	0.0291388	0	0.00185692	0	0.235621	0.00522765	0.00696808	0.106672	0.00397749	0.0830237	0.00363536	0.151478	0.675546	0	0.0105281	0	0.00157418	0	0	0.14341	0.0313033	0.00037346	0.00503958	0.0705578	0.100612	0.0109022	0.215076	0.000272981	0.0154454	0	0.0530754	0.00493015	0.00875993	0.00187742	0.00304992	0.0372953	0.141208	0.0967418	0.0893077	0.0420659	0.0929375	0.141663	0.233184	0.0331463	0.00425657	0.285768
12	Chiba	73	Public administration	0	0	0	0	0	0	0	0	0	0	0	0	0	0	0	0	0	0	0	0	0	0	0	0	0	0	0	0	0	0	0	0	0	0	0	0	0	0	0	0	0	0	0	0	0	0
12	Chiba	74	Education and Research	3.1687	0	0.105991	0	216.769	20.2099	1.97574	13.6259	0.676669	50.6801	0.827892	38.6136	14.6082	0.348444	29.1272	0	8.7285	0.368249	0	684.954	527.465	0.258845	3.08542	366.214	197.056	43.195	85.441	0.964937	11.7559	0	73.5732	4.44221	0.140112	17.1763	16.9905	33.5535	30.4606	305.859	562.831	45.7972	471.665	561.485	961.693	190.969	13.2465	1386.72
12	Chiba	75	Medical service, health and social security and nursing care	1.71508	0	0.058878	0	23.1621	4.3833	0.170726	7.23355	0.259875	3.50466	0.46656	8.03719	9.73783	0	0.866996	0	0.113136	0	0	16.1712	11.5358	0.0671014	0.603657	12.6775	10.2241	0.706474	17.3329	0.0490479	0.205567	0	4.41927	0.787399	2.66359	0.168662	0.205498	2.49646	7.90561	29.4158	19.3894	18.4885	24.746	6.81144	7.60721	0.794075	0.15296	29.6224
12	Chiba	76	Advertising and survery	0	0	0	0	0	0	0	0	0	0	0	0	0	0	0	0	0	0	0	0	0	0	0	0	0	0	0	0	0	0	0	0	0	0	0	0	0	0	0	0	0	0	0	0	0	0
12	Chiba	77	Giids rental and leasing services	6.81608	0	0.0795483	0	58.7626	2.8984	0.92265	3.11501	0.916785	13.7869	0.861486	18.5642	92.8485	0	1.72748	0	0.144363	0	0	10.6574	1.59389	0.292123	4.32712	32.3363	12.7013	1.61493	26.4039	0.0957192	2.05216	0	9.25291	1.8026	2.99891	0.354472	1.66585	7.33753	25.0328	86.1764	66.2186	37.1111	29.8698	63.298	49.3303	9.14158	0.723308	117.605
12	Chiba	78	Other business services	26.9533	0	0.412275	0	383.904	17.9563	3.67175	44.26	6.66138	86.2057	4.03701	150.562	1357.33	0.056473	13.7974	0	1.07513	0.0795771	0	109.767	56.6063	2.01367	6.34039	244.763	135.327	24.2846	210.76	0.220785	12.8263	0	39.7859	18.5589	5.81329	8.77319	8.29102	51.0621	91.0809	261.983	201.186	70.4296	132.674	153.963	340.846	43.0424	5.73779	292.003
12	Chiba	79	Personal services	44.0921	0	0	0	19.1477	0.675203	0	3.15977	0.315245	2.90693	0	4.72709	35.4776	0	0.254963	0	0	0	0	6.46704	1.94937	0	0	7.62124	2.63628	0.259696	5.515	0	0.0831222	0	3.38581	0.318389	1.17495	0	0.221584	1.48762	4.16311	7.38897	6.0829	2.8211	4.23026	9.08416	5.77917	1.84626	0	11.9247
12	Chiba	80	Activities not elsewhere classified	0	0	0	0	0	0	0	0	0	0	0	0	0	0	0	0	0	0	0	0	0	0	0	0	0	0	0	0	0	0	0	0	0	0	0	0	0	0	0	0	0	0	0	0	0	0
13	Tokyo	1	Agriculture, forestry and fishery	1007.46	0	0	0	20685.3	707.44	120.717	5.32577	1191.2	0	6.2134	0.887629	0	0	5.32577	0	4.43814	0	0	44.3814	94.9763	0	15.0897	0	6080.26	0	0	0	25.7412	0	0	0	0	0	0.887629	0	0	0	0	0	0	0	0	0	0	0
13	Tokyo	2	Metallic ores	0	0	0	0	0	0	0	0	0	0	0	0	0	0	0	0	0	0	0	0	0	0	0	0	0	0	0	0	0	0	0	0	0	0	0	0	0	0	0	0	0	0	0	0	0	0
13	Tokyo	3	Non-metallic ores	0	0	32.0061	0	0	0	0	0	0	0	35.4662	0	0	0	70.9324	0	1.73006	0	0	18.1656	6.92024	-18.1656	4.32515	0	29.411	4878.77	375.423	31.1411	515.558	0	0	10.3804	0	1.73006	0.86503	3.46012	9.51533	0	0	25.9509	0	0	0	0	0	0
13	Tokyo	4	Coal mining, crude petroleum and natural gas	0	0	0	0	0	0	0	0	0	0	0.0463226	0.00112071	0	0.00336212	0.00186785	0	0.00336212	0	0	0.00635068	0.000747139	3.18655	0	0	0.00224142	0.0377305	0.0635068	0.00224142	0.0287648	0	0.0220406	0.000373569	0	0.00336212	0.000373569	0.000373569	0	0	0	0.000747139	0	0	0	0	0	0
13	Tokyo	5	Food and Tobacco	386.423	0	0	0	61719.4	2110.53	0	130.217	0.845564	0	6.76451	0	0	0	0.845564	0	0.845564	0	0	399.106	133.599	0	0	0.845564	0	0	0	0	5.07338	0	0	0	0	0	0	0	0	0	0	0	0	0	0	0	0	0
13	Tokyo	6	Beverage	52.4178	0	0	0	124.492	690.792	0	0	0	0	0	0	0	0	0	0	0.936032	0	0	0	0.936032	0	0	0	0	0	0	0	0	0	0	0	0	0	0	0	0	0	0	0	0	0	0	0	0	0
13	Tokyo	7	Textile products	47.2409	0	0	0	0	0.774441	674.538	10845.3	0	105.324	14.7144	24.0077	76.6696	0	0	0	0	0	0	0.774441	0	0	0	23.2332	536.687	5.42108	0	0	20.1355	0	0	0	0	0	3.09776	0.774441	6.19552	3.09776	86.7373	0	0	0	0	0.774441	8.51885	15.4888
13	Tokyo	8	Wearing aparel and other textile products	190.272	0	2.71263	0	360.392	10.463	74.7911	402.632	18.2134	39.5269	8.13789	47.6648	67.4282	0	3.48767	0	1.55007	0	0	60.4529	17.8259	0	13.5631	11.238	36.4267	22.0886	21.701	0	31.0015	0	14.7257	3.48767	8.91293	0.775037	7.36285	8.91293	46.8897	58.5153	45.7272	44.9522	36.0392	189.497	108.505	17.8259	3.48767	251.887
13	Tokyo	9	Timber and wooden products	30.715	0	0	0	104.012	5.58454	0	18.1498	1680.25	2436.26	564.737	465.611	12.5652	0	0	0	0	0	0	14.6594	0	0	0	12.5652	0.698068	69.1087	0.698068	5.58454	21.6401	0	0	9.77295	0	0	30.715	19.5459	60.7319	11.1691	17.4517	4.18841	61.4299	21.6401	25.1304	7.67874	0.698068	25.1304
13	Tokyo	10	Furniture and fixtures	1.60289	0	0	0	93.7691	4.00723	2.40434	45.6824	1.60289	896.817	3.20578	20.0361	65.7185	0	2.40434	0	3.20578	0	0	56.9026	12.8231	0	0	35.2636	15.2275	4.00723	8.8159	0.801445	14.426	0	6.41156	3.20578	0	0	2.40434	1.60289	11.2202	12.0217	35.2636	8.8159	11.2202	29.6535	48.0867	6.41156	2.40434	258.867
13	Tokyo	11	Pulp, paper, paperboard, building paper	0.933592	0	0	0	36.4101	0.933592	12.1367	3.73437	21.4726	117.633	2686.88	2106.18	3798.78	0	14.9375	0	0	1.86718	0	128.836	1.86718	0	0	30.8085	13.0703	14.9375	0	0	29.8749	0	1.86718	0	2.80078	0	2.80078	0	0.933592	0.933592	0	2.80078	0	118.566	1.86718	1.86718	0.933592	46.6796
13	Tokyo	12	Paper products	192.216	0	0	0	4505.13	513.533	16.2571	130.057	2.8689	285.934	0	113.8	273.502	0.9563	18.1697	0	3.8252	0	0	4022.2	284.977	0	0	87.0233	35.3831	216.124	28.689	12.4319	20.0823	0	0	0	2.8689	0	0.9563	0	92.7611	24.8638	2.8689	21.0386	29.6453	69.8099	74.5914	28.689	8.6067	225.687
13	Tokyo	13	Publishing, printing	8.93506	0	0.992784	0	4429.8	113.177	8.93506	479.515	8.93506	185.651	0.992784	1038.45	77541.4	0	18.8629	0	0	0	0	2159.31	61.5526	0.992784	0.992784	14.8918	36.733	166.788	7.94227	0	17.8701	0	13.899	12.9062	1.98557	0.992784	12.9062	13.899	220.398	157.853	187.636	61.5526	540.075	117.149	313.72	13.899	33.7547	1541.79
13	Tokyo	14	Chemical fertilizer	166.197	0	0	0	0	0.769429	0	0	0	0	0	0	0	9.23315	45.3963	0	10.0026	0.769429	0	70.0181	31.5466	0	0	0	0	0	0	0	0.769429	0	17.6969	0	0	0	0	0	0	0	0	0	0	0	0	0.769429	0	0
13	Tokyo	15	Basic inorganic chemical products	0	0	0	0	668.736	24.768	75.1296	0.8256	0	4.128	23.9424	16.512	3.3024	6.6048	839.635	0	134.573	1.6512	0	3378.36	790.925	0	0	146.957	781.843	450.778	16.512	0	4.128	0	98.2464	2.4768	0.8256	1.6512	1.6512	18.9888	22.2912	14.0352	18.9888	18.1632	9.0816	38.8032	80.9088	40.4544	0	91.6416
13	Tokyo	16	Basic organic chemical products	0	0	0	0	0	0	0	0	0	0	0	0	15.1476	0	0	0	31.2419	0	0	270.763	10.414	0	0	0	0.946725	0	0	0	0	0	0	0	0	0	0	0	0	0.946725	0	0	0	0	0	0	0	0
13	Tokyo	17	Organic chemical products	55.855	0	0	0	367.898	80.4312	262.146	1.48947	6.7026	4.4684	41.7051	4.4684	56.5997	0	89.368	0	1374.78	63.3023	0	7104.75	2315.38	0	1.48947	784.949	1541.6	32.0235	0	0	7.44733	0	0	0	0	0.744733	11.171	0.744733	7.44733	27.5551	0.744733	6.7026	110.22	25.3209	5.95786	3.72367	14.8947	18.6183
13	Tokyo	18	Synthetic resins	0	0	0	0	0	0	4.13351	0	0	11.5738	24.801	16.534	6.61361	0	0	0	0	0	0	2337.91	0	0	0	2634.7	0	0	0	0	5.78691	0	0	0	0	0	2.4801	0	0	0	0	2.4801	9.92042	153.766	0	7.44031	4.96021	125.659
13	Tokyo	19	Synthetic fibers	0	0	0	0	0	0	194.057	699.76	0	8.65682	2.16421	0	0	0	0	0	0	0	0	0	0	0	1.4428	9.37822	2.88561	0	0	0	0	0	0	0	0	0	0	0	0	0	0	0	0	0	0	0	0	0
13	Tokyo	20	Final chemical products	58.1241	0	9.54276	0	291.488	19.953	54.654	81.5472	117.983	192.59	104.97	440.702	14138.9	0	178.71	0	45.9788	0	0	7692.33	790.314	8.67524	30.3633	236.834	126.658	17.3505	26.8932	0	118.851	0	7.80771	6.94019	1.73505	0	11.2778	13.8804	126.658	43.3762	53.7865	29.4958	355.685	99.7652	87.6199	54.654	1.73505	216.013
13	Tokyo	21	Medicaments	643.858	0	0	0	26.1023	0	0	0.870078	0	0	0	0	0	0	0	0	0	0	0	177.496	1645.32	0	0	0	0	0	0	0	0	0	0	0	0	0	0	0	0	0	0	0	0	0	0	0	0	0
13	Tokyo	22	Petroleum refinery products	414.334	0	1.76688	0	735.024	7.95098	53.89	9.71786	4.41721	17.6688	22.9695	16.7854	965.602	0.883442	99.829	0	74.2091	0	0	238.529	13.2516	116.614	198.774	9.71786	37.988	238.529	25.6198	7.06754	72.4422	0	98.0621	5.30065	0	6.18409	13.2516	19.4357	90.9945	34.4542	15.902	7.95098	3.53377	22.9695	21.2026	47.7059	0	26.5033
13	Tokyo	23	Coal products	0	0	0	0	0	0	0	0	0	0	2.82649	0	0	0	6.59515	0	11.306	0	0	0.942164	0	0	0	0	0	0	0	0	34.8601	0	101.754	84.7947	0	18.8433	5.65298	0.942164	0	0	3.76866	0.942164	0	0	0	0	0	1.88433
13	Tokyo	24	Plastic products	106.785	0	0	0	1529.08	229.721	6.28144	190.238	23.3311	275.486	38.586	459.443	7579.01	0.897349	27.8178	0	0.897349	0	0	1249.11	306.893	0	0	4864.53	515.078	45.7648	2.69205	0	12.5629	0	0	0	0	0.897349	88.8375	19.7417	54.7383	53.8409	626.35	57.4303	435.214	509.694	365.221	571.611	24.2284	2606.8
13	Tokyo	25	Rubber products	145.475	0	1.44751	0	91.1932	2.17127	3.61878	60.0717	2.17127	21.7127	2.89502	14.4751	145.475	0	0.723755	0	2.17127	0	0	18.8176	12.3038	0	1.44751	14.4751	743.297	0	26.779	0	30.3977	0	23.8839	0.723755	0.723755	0	0.723755	28.9502	29.674	290.226	348.85	44.8728	380.695	263.447	240.287	60.0717	8.68507	539.198
13	Tokyo	26	Glass and glass products	0.82286	0	0	0	148.938	514.288	0	0	0	272.367	0	0	2.46858	0	9.05147	0	0	0	0	796.529	151.406	0	0	67.4746	4.93716	269.075	0.82286	0	21.3944	0	0	0	0	0	0	4.1143	9.87433	9.05147	1.64572	0	51.0173	4.93716	173.624	96.2747	3.29144	39.4973
13	Tokyo	27	Cement and cement products	0	0	0	0	0	0	0	0	0	0	0	0	0	0	0	0	0	0	0	0	0	0	0	0	0	0	592.151	0	0.995212	0	0	0	0	0	0	0	0	0	0	0	0	0	0	0	0	0
13	Tokyo	28	Pottery, china and earthenware	0	0	0	0	17.004	0	0	0	0	23.1872	0	0	0	0	0.772907	0	0	0	0	0.772907	0	0	0	0.772907	0	0	0.772907	3.86453	0	0	0	0	0	0	0	0	1.54581	0.772907	0	0	0	44.8286	3.09163	0.772907	0	37.0995
13	Tokyo	29	Other ceramic, stone and clay products	7.77137	0	0	0	20.7237	0	0	0	0	12.9523	4.31743	0	2.59046	0	75.9868	0	0	0	0	11.2253	10.3618	0	48.3552	8.63486	3.45394	89.8025	1449.79	9.49835	492.187	0	12.9523	24.1776	0	0.863486	7.77137	12.9523	67.3519	456.784	90.666	51.8092	5.18092	99.3009	41.4473	46.6282	0.863486	61.3075
13	Tokyo	30	Pig iron and crude steel	0	0	0	0	0	0	0	0	0	0	0	0	0	0	0	0	0	0	0	0	0	0	0	0	0	0	0	0	0	0	15.3049	575.848	1.91312	0	0	0	0.956559	0	0	0	0	0	0	0	0	0
13	Tokyo	31	steel products	1.74654	0	0	0	0	0	0	0	8.73269	830.479	0	0	0	0	0	0	0	0	0	0	0	0	0	68.9883	124.878	0	148.456	0	6.98615	0	7234.16	202.598	9047.94	0	9.60596	940.511	5646.56	1516	2190.16	482.045	315.25	2149.12	344.941	478.552	44.5367	439.254
13	Tokyo	32	Cast and forged steel products	0	0	0	0	0	0	0	0	0	9.91295	0	0	0	0	0	0	0	0	0	0	0	0	0	0	0	0	0	0	0.991295	0	0	0	0	0	0.991295	77.321	85.2514	843.592	570.986	430.222	122.921	311.267	64.4342	12.8868	0.991295	15.8607
13	Tokyo	33	Other iron or steel products	0	0	0	0	0	0	0	0	0	1691.4	0	0	0	0	1.88773	0	0	0	0	2.83159	0	0	0	1.88773	0	0	19.8211	0	18.8773	0	0	24.5405	0	0	4.71932	1861.3	5150.67	1665.92	1493.19	200.099	348.286	798.509	9.43864	234.078	70.7898	1031.64
13	Tokyo	34	Non-ferrous metals	0	0	0	0	0	0	0	0	0	12.2563	0.395366	0	2.37219	0	258.174	0	9.48878	0	0	650.377	0	0	0	10.2795	0	55.3512	0	1.97683	32.8154	0	756.335	5.13975	0	428.181	3198.9	9.88414	600.165	0	59.3049	64.0492	0.395366	209.544	36.3736	2843.87	1.1861	87.3758
13	Tokyo	35	Non-ferrous metal products	0	0	0	0	61.8087	4.06636	0	0	1.62655	213.891	0	3.25309	78.8875	0	4.06636	0	0	0	0	23.5849	2.43982	0	0	50.4229	51.2362	4.06636	0	0	10.5725	0	0	0	0	8.946	823.845	238.289	605.888	645.739	495.283	326.936	204.131	1360.61	1139.4	2473.16	29.2778	4590.11
13	Tokyo	36	Metal products for construction and architecture	0.970338	0	0	0	0	0	0	0	0	9.70338	0	0	0	0	0	0	0	0	0	0	0	0	0	0	0	0	0	0	0	0	0	0	0	0	0	111.589	24.2584	4.85169	0	3.88135	0	0	0	0	0	2.91101
13	Tokyo	37	Other metal products	24.9009	0	1.84451	0	700.915	510.93	0	246.242	171.54	1078.12	11.9893	31.3567	114.36	0	47.0351	0	12.9116	0	0	849.398	131.883	3.68903	8.30031	51.6464	523.842	79.3141	35.968	0	255.465	0	0	25.8232	0.922256	0	27.6677	1132.53	3709.32	1625.94	1581.67	576.41	1098.41	969.291	736.883	168.773	39.657	1257.04
13	Tokyo	38	General industrial machinery	0	0	0	0	0	0	0	0	0	10.0988	0	0	0	0	0	0	0	0	0	0	0	0	0	157.908	0	1.83614	0.918071	0	21.1156	0	0	6.4265	7.34457	0	1.83614	3.67229	39.4771	14311.8	2538.47	388.344	580.221	291.029	285.52	5.50843	13.7711	48.6578
13	Tokyo	39	Special industrial machinery	0	0	0	0	0	0	0	0	0	0	0	0	0	0	0	0	0	0	0	0	0	0	0	0	0	0	0	0	0	0	0	0	0	0	0	0	0	40.1466	22003.7	0	2.50916	0	2.50916	22.5825	0	0
13	Tokyo	40	Other general machines	0	0	0	0	0	0	0	0	0	72.2217	0	0	0	0	0	0	0	0	0	4.45813	0	0	0	9.80788	0	1.78325	0	0	6.24138	0	0	4.45813	0	0	1.78325	6.24138	26.7488	1391.83	1353.49	2691.82	123.936	235.389	169.409	17.8325	8.91626	129.286
13	Tokyo	41	Machinery for office and service industry	0	0	0	0	0	0	0	0	0	0	0	0	0	0	0	0	0	0	0	0	0	0	0	0	0	0	0	0	0	0	0	0	0	0	0	0	0	0	0	0	1927.81	0	0	0	0	0
13	Tokyo	42	Industrial electric equipment	13.4074	0	0	0	0	0	0	0	0	2.36601	0	0	0	0	0	0	0	0	0	0	0	0	0	0	0	0	0	0	0	0	0	0	0	0	0	0	0	716.901	1177.48	7.09803	716.113	5831.43	1947.23	347.804	33.1241	1156.98
13	Tokyo	43	Applied electric equipment and electric mesuring instruments	0	0	0	0	0	0	0	0	0	0	0	0	0	0	0	0	0	0	0	0	0	0	0	0	0	0	0	0	0	0	0	0	0	0	0	0	0	80.6385	450.54	21.4543	65.8424	844.115	6005.72	0	0	130.945
13	Tokyo	44	Other electric equipment	9.67226	0	0.806022	0	0	0	0	0	0	7.2542	0	0	0	0	0	0	0	0	0	4.83613	0	0	0	0	0	0	0	0	0	0	0	0	0	0	0	0	14.5084	37.883	145.084	21.7626	105.589	452.984	279.69	1988.46	12.0903	1609.63
13	Tokyo	45	Household electric and electric applications	0	0	0	0	0	0	0	0	0	0	0	0	0	0	0	0	0	0	0	0	0	0	0	0	0	0	0	0	0	0	0	0	0	0	0	0	0	0	0	0	0	0	0	0	96.3133	0
13	Tokyo	46	Communication equipment	0	0	0	0	0	0	0	0	0	0	0	0	3.31715	0	0	0	0	0	0	0	1.65858	0	0	0	0	0	0	0	0	0	0	0	0	0	0	0	0	16.5858	4.14644	0	0	0.829288	69.6602	0.829288	0	1054.85
13	Tokyo	47	Electric computing equipment and accessory equipment	0	0	0	0	0	0	0	0	0	0	0	0	0	0	0	0	0	0	0	0	0	0	0	0	0	0	0	0	0	0	0	0	0	0	0	0	0	0	55.4674	0	0	0	0	0	0	13.6344
13	Tokyo	48	Semiconductor devices and integrated circuits	0	0	0	0	0	0	0	0	0	0	0	0	0	0	0	0	0	0	0	0	0	0	0	0	0	0	0	0	0	0	0	0	0	0	0	0	5.76804	17.3041	149.969	29.2522	2064.55	2158.48	14796.3	129.369	100.941	16826.2
13	Tokyo	49	Other electrical equipment	0	0	0	0	0	0	0	0	0	0	0	0.849772	76.4795	0	0	0	0	0	0	0	0	0	0	0	0	0	0	0	0	0	0	0	0	0	1.69954	0	3.39909	200.546	561.7	11.047	1893.29	2237.45	19839.6	71.3809	84.1275	22696.6
13	Tokyo	50	Passenger motor cars	0	0	0	0	0	0	0	0	0	0	0	0	0	0	0	0	0	0	0	0	0	0	0	0	0	0	0	0	0	0	0	0	0	0	0	0	0	0	0	0	0	0	0	0	0	0
13	Tokyo	51	Other cars	0	0	0	0	0	0	0	0	0	0	0	0	0	0	0	0	0	0	0	0	0	0	0	0	0	0	0	0	0	0	0	0	0	0	0	0	0	0	0	0	0	0	0	0	0	0
13	Tokyo	52	Motor vheicle parts and accessories	0	0	0	0	0	0	0	0	0	0	0	0	0	0	0	0	0	0	0	0	0	0	0	0	0	0	0	0	0	0	0	0	0	0	0	0	0	0	3.89356	0	0	0	0	0	0	0
13	Tokyo	53	Other transportation equipment	151.662	0	0	0	0	0	0	0	0	0	0	0	0	0	0	0	0	0	0	0	0	0	0	0	0	0	0	0	0	0	0	0	0	0	0	0	0	0	0	0	0	0	0	0	0	0
13	Tokyo	54	Precision instruments	40.6467	0	0	0	0	0	0.541957	0.541957	0.541957	0	1.08391	0.541957	1.08391	0	0	0	0	0	0	1.62587	1.08391	0	0	4.87761	0	0	0	0	0	0	0	0	0	0	0.541957	0.541957	1.08391	111.101	407.551	1.62587	105.682	93.2165	160.961	0.541957	0.541957	169.632
13	Tokyo	55	Miscellaneous manufacturing products	40.806	0	2.267	0	62.7204	12.0907	2.267	1615.62	17.3803	194.962	3.02267	6.801	27.204	0	0	0	3.77834	0	0	19.6473	0	0	3.77834	7.55667	6.801	55.9194	4.534	3.77834	87.6574	0	0	18.8917	0.755667	0	12.0907	12.0907	12.0907	127.708	53.6524	6.04534	0	12.0907	52.8967	3.77834	0.755667	186.65
13	Tokyo	56	Reuse and recycling	0	0	0	0	0	142	0	0	0	0	13	0	0	0	7	0	0	0	0	0	0	0	0	144	1	28	8	1	1	0	13	136	10	153	292	0	0	0	0	0	0	0	0	0	0	0
13	Tokyo	57	Building construction and repair of construction	303	0	5	0	863	173	46	1042	73	456	206	768	1703	1	127	0	20	3	0	1162	230	15	87	1326	229	336	482	0	371	0	612	68	216	153	77	609	796	492	975	169	40	928	687	491	14	2000
13	Tokyo	58	Public construction	0	0	0	0	0	0	0	0	0	0	0	0	0	0	0	0	0	0	0	0	0	0	0	0	0	0	0	0	0	0	0	0	0	0	0	0	0	0	0	0	0	0	0	0	0	0
13	Tokyo	59	Other civil enginnering and construction	0	0	0	0	0	0	0	0	0	0	0	0	0	0	0	0	0	0	0	0	0	0	0	0	0	0	0	0	0	0	0	0	0	0	0	0	0	0	0	0	0	0	0	0	0	0
13	Tokyo	60	Electricity	261.969	0	66.9921	1.99977	6505.24	556.935	182.979	661.922	263.969	544.936	497.942	329.961	5888.31	1.99977	335.961	0	173.98	0.999883	0	2001.77	265.969	247.971	69.9918	1600.81	1490.83	388.954	398.953	15.9981	425.95	0	1260.85	575.932	264.969	464.945	211.975	365.957	1944.77	1318.85	1810.79	602.929	401.953	1149.87	557.935	337.96	149.982	1831.79
13	Tokyo	61	Gas supply and heat supply	1.99988	0	0	0	2687.85	326.981	57.9967	37.9978	3.99977	45.9973	19.9988	100.994	59.9965	0	21.9987	0	19.9988	0	0	341.98	190.989	0	2.99983	327.981	117.993	390.977	35.9979	10.9994	24.9986	0	400.977	64.9963	2.99983	16.999	32.9981	68.996	347.98	123.993	110.994	36.9979	67.9961	182.989	69.996	146.992	3.99977	455.974
13	Tokyo	62	Water supply and waste management services	26.9925	0	1.99944	0	2626.27	366.898	92.9741	46.9869	23.9933	74.9791	93.9738	73.9794	611.829	0	54.9847	0	50.9858	0.999721	0	870.757	401.888	14.9958	5.99833	151.958	118.967	62.9824	368.897	2.99916	161.955	0	142.96	9.99721	12.9964	36.9897	24.993	67.981	179.95	478.867	530.852	116.967	167.953	242.932	172.952	54.9847	27.9922	331.907
13	Tokyo	63	Commerce	2773.06	0	32.6709	0	48937	2803.76	443.532	7749.93	1072.2	4669.96	1481.08	4550.16	33075.8	3.96011	552.435	0	330.669	10.8903	0	11163.5	2787.91	63.3617	273.247	4515.51	3805.66	796.971	3174.03	27.7207	995.967	0	2194.89	449.472	2887.91	191.075	764.301	1739.48	4918.45	7382.63	11910	2310.72	6232.22	7264.81	15731.5	3907.63	319.779	23320.1
13	Tokyo	64	Financial and insurance	1603.33	0	43.3333	0.984847	3998.48	511.135	418.56	5300.45	250.151	2083.94	427.424	1805.22	8434.23	0.984847	183.182	0	50.2272	0.984847	0	1358.1	498.332	104.394	11.8182	910.983	1329.54	683.484	3035.3	27.5757	545.605	0	521.969	140.833	444.166	458.939	118.182	584.014	977.953	2437.5	2359.69	1776.66	776.059	1989.39	1600.38	260	58.106	3093.4
13	Tokyo	65	Real estate agencies and rental services	199.988	0	1.99988	0	663.959	72.9955	26.9983	609.962	10.9993	337.979	77.9952	321.98	1017.94	0	34.9978	0	7.9995	0	0	201.987	190.988	3.99975	15.999	691.957	268.983	41.9974	581.964	2.99981	48.997	0	90.9944	51.9968	30.9981	22.9986	14.9991	72.9955	316.98	437.973	599.963	258.984	101.994	678.958	560.965	245.985	14.9991	560.965
13	Tokyo	66	House rent	0	0	0	0	0	0	0	0	0	0	0	0	0	0	0	0	0	0	0	0	0	0	0	0	0	0	0	0	0	0	0	0	0	0	0	0	0	0	0	0	0	0	0	0	0	0
13	Tokyo	67	Transport	3405.56	0	422.031	0	7643.64	948.014	146.6	1151.48	639.709	977.334	237.226	757.878	10354.4	0	210.571	0	61.3055	0	0	2669.01	1058.19	131.496	23.9891	1049.3	563.3	444.243	6829.79	8.88485	3179	0	1200.34	99.5104	395.376	123.499	239.003	855.611	1938.67	2166.13	2265.64	951.568	1163.03	1505.98	3597.48	462.012	45.3127	6723.17
13	Tokyo	68	Communication	423.569	0	12.8955	0	340.244	25.7911	21.8232	499.951	3.96786	389.842	30.7509	215.256	2466.03	0	25.7911	0	4.95983	0	0	474.159	1906.56	50.5902	23.8072	371.987	576.332	94.2367	50.5902	0	47.6143	0	66.4617	46.6224	8.92769	82.3331	64.4777	247.991	374.963	1082.23	661.641	311.477	341.236	798.532	770.757	118.044	11.9036	1069.34
13	Tokyo	69	Broadcasting	1	0	0	0	10	1	0	3	0	4	0	3	30	0	0	0	0	0	0	9	0	3	0	8	4	1	2	0	0	0	3	0	1	2	0	1	4	8	7	3	5	6	10	1	0	13
13	Tokyo	70	Information services	395.869	0	9.77454	0	1090.84	175.942	22.4814	154.438	38.1207	733.09	50.8276	350.906	2382.05	0	24.4363	0	16.6167	0	0	558.126	1256.03	0.977454	12.7069	719.406	402.711	184.739	245.341	5.86472	80.1512	0	130.979	54.7374	115.34	58.6472	72.3316	135.866	664.669	1170.99	1914.83	489.704	676.398	2354.69	4942.01	1030.24	9.77454	4597.94
13	Tokyo	71	﻿Internet based services	15.9566	0	0	0	51.859	11.9675	2.99187	50.8618	4.98645	76.7913	3.98916	30.916	252.314	0	2.99187	0	0	0	0	23.9349	285.225	0.997289	0.997289	107.707	23.9349	15.9566	25.9295	0	6.98103	0	6.98103	7.97831	0.997289	1.99458	10.9702	34.9051	64.8238	106.71	84.7696	29.9187	42.8834	165.55	100.726	20.9431	0.997289	403.902
13	Tokyo	72	Image information production and distribution industry	55.871	0	16.376	0	316.924	8.66964	21.1925	349.676	10.5962	159.907	13.4861	143.531	1188.7	0	23.119	0	4.81647	0	0	279.355	94.4028	0.963293	5.77976	108.852	235.044	58.7609	262.016	0.963293	52.0178	0	39.495	8.66964	12.5228	5.77976	7.70635	49.128	265.869	150.274	184.952	62.6141	159.907	410.363	700.314	115.595	9.63293	751.369
13	Tokyo	73	Public administration	0	0	0	0	0	0	0	0	0	0	0	0	0	0	0	0	0	0	0	0	0	0	0	0	0	0	0	0	0	0	0	0	0	0	0	0	0	0	0	0	0	0	0	0	0	0
13	Tokyo	74	Education and Research	88.1141	0	13.556	0	4228.51	486.08	87.1459	647.784	26.1438	1415.64	44.5412	530.621	372.791	7.7463	927.619	0	387.315	11.6194	0	19350.3	23069.4	9.68287	51.3192	8193.65	6676.34	3376.42	1509.56	49.3827	574.194	0	793.996	113.29	2.90486	766.884	622.609	641.006	831.759	6890.33	16904.4	988.621	11769.5	23588.4	41887.1	9658.67	434.761	52878.2
13	Tokyo	75	Medical service, health and social security and nursing care	18.979	0	2.99668	0	179.801	41.9536	2.99668	136.849	3.99558	38.9569	9.98894	43.9513	98.8905	0	10.9878	0	1.99779	0	0	181.799	200.778	0.998894	3.99558	112.875	137.847	21.9757	121.865	0.998894	3.99558	0	18.979	7.99115	21.9757	2.99668	2.99668	18.979	85.9049	263.708	231.743	158.824	245.728	113.874	131.854	15.9823	1.99779	449.502
13	Tokyo	76	Advertising and survery	1047.37	0	13.4771	0	3676.37	1818.45	17.3277	221.41	33.6928	1375.63	520.795	1457.46	511.168	0.962652	74.1242	0	5.77591	0	0	19994.3	2708.9	2.88796	0	1586.45	1339.05	92.4146	90.4893	9.62652	111.668	0	138.622	42.3567	20.2157	5.77591	28.8796	137.659	269.543	744.13	890.454	556.413	721.027	1115.71	2127.46	395.65	65.4604	3660.97
13	Tokyo	77	Giids rental and leasing services	501.785	0	26.9348	0	3034.65	184.553	107.739	392.05	93.7729	1019.53	122.703	675.364	6272.81	0	145.647	0	16.9589	0	0	797.069	184.553	28.9299	190.538	1915.36	1139.24	334.19	1235.01	12.9686	265.357	0	264.36	121.705	164.601	41.8985	161.609	371.101	1809.62	5139.55	5265.25	2120.86	1973.22	7039.95	5688.22	1224.03	62.8478	11872.2
13	Tokyo	78	Other business services	582.06	0	40.9489	0	5815.72	335.391	125.772	1634.06	199.87	1870	168.671	1606.76	26899.5	0.974974	341.241	0	37.049	1.94995	0	2408.19	1922.65	58.4985	81.8978	4252.84	3560.61	1474.16	2891.77	8.77477	486.512	0	333.441	367.565	93.5975	304.192	235.944	757.555	1931.42	4583.35	4692.55	1180.69	2571.01	5023.07	11529.1	1690.61	146.246	8647.05
13	Tokyo	79	Personal services	284.148	0	0	0	86.5617	3.76355	0	34.8129	2.82266	18.8178	0	15.0542	209.818	0	1.88178	0	0	0	0	42.34	19.7586	0	0	39.5173	20.6995	4.70444	22.5813	0	0.940888	0	8.46799	1.88178	5.64533	0	1.88178	6.58622	26.3449	38.5764	42.34	14.1133	24.4631	88.4435	58.335	21.6404	0	105.379
13	Tokyo	80	Activities not elsewhere classified	1276.16	0	16.3061	0	3808.75	296.084	52.351	1240.12	1016.98	279.777	331.27	1740.46	7995.11	0	68.6571	0	42.9107	0.858213	0	281.494	589.592	15.4478	72.0899	1027.28	535.525	165.635	3916.88	21.4553	358.733	0	363.024	290.934	680.563	130.448	106.418	141.605	1234.97	3552.14	2633	792.131	1209.22	869.37	1361.13	764.668	24.03	1849.45
14	Kanagawa	1	Agriculture, forestry and fishery	19.1539	0	0	0	560.617	15.5503	1.44693	0.059226	16.3	0	0.061057	0.0341493	0	0	0.0884109	0	0.0528776	0	0	0.830559	1.14806	0	0.479633	0	94.8784	0	0	0	0.278626	0	0	0	0	0	0.0128061	0	0	0	0	0	0	0	0	0	0	0
14	Kanagawa	2	Metallic ores	0	0	0	0	0	0	0	0	0	0	0	0	0	0	0	0	0	0	0	0	0	0	0	0	0	0	0	0	0	0	0	0	0	0	0	0	0	0	0	0	0	0	0	0	0	0
14	Kanagawa	3	Non-metallic ores	0	0	0.0731043	0	0	0	0	0	0	0	0.192576	0	0	0	0.650651	0	0.0113897	0	0	0.187845	0.0462223	-0.14186	0.0759644	0	0.253592	18.2332	6.20742	0.177759	3.08354	0	0	0.118904	0	0.0113197	0.00689598	0.0529104	0.101798	0	0	0.351185	0	0	0	0	0	0
14	Kanagawa	4	Coal mining, crude petroleum and natural gas	0	0	0	0	0	0	0	0	0	0	0	0	0	0	0	0	0	0	0	0	0	0	0	0	0	0	0	0	0	0	0	0	0	0	0	0	0	0	0	0	0	0	0	0	0	0
14	Kanagawa	5	Food and Tobacco	46.4529	0	0	0	10576.6	293.333	0	9.15623	0.0731592	0	0.420303	0	0	0	0.0887543	0	0.0636995	0	0	47.2256	10.2111	0	0	0.126334	0	0	0	0	0.347225	0	0	0	0	0	0	0	0	0	0	0	0	0	0	0	0	0
14	Kanagawa	6	Beverage	5.96877	0	0	0	20.208	90.9437	0	0	0	0	0	0	0	0	0	0	0.0667938	0	0	0	0.0677668	0	0	0	0	0	0	0	0	0	0	0	0	0	0	0	0	0	0	0	0	0	0	0	0	0
14	Kanagawa	7	Textile products	1.3219	0	0	0	0	0.0250547	11.8997	177.51	0	2.93399	0.212814	1.35941	2.33776	0	0	0	0	0	0	0.0213309	0	0	0	0.808004	12.3259	0.0539647	0	0	0.320779	0	0	0	0	0	0.0657786	0.0315435	0.176549	0.106998	2.24715	0	0	0	0	0.0119146	0.201966	0.316064
14	Kanagawa	8	Wearing aparel and other textile products	16.1156	0	0.0499533	0	43.5134	1.02459	3.99364	19.9472	1.11029	3.33285	0.356255	8.16941	6.22316	0	0.25793	0	0.0822746	0	0	5.03999	0.95994	0	1.92058	1.183	2.53226	0.665553	2.8929	0	1.49492	0	3.21377	0.322093	1.01253	0.0408847	0.473232	1.09884	4.04442	6.1177	3.58585	4.90453	3.40164	10.6237	5.86737	0.830106	0.250279	15.558
14	Kanagawa	9	Timber and wooden products	0.188058	0	0	0	0.907821	0.039532	0	0.0649998	7.40437	14.8496	1.78716	5.76879	0.0838315	0	0	0	0	0	0	0.0883481	0	0	0	0.0956168	0.00350796	0.150528	0.00672697	0.0185788	0.0754334	0	0	0.065244	0	0	0.142707	0.174196	0.378672	0.0844121	0.0989289	0.0330342	0.419142	0.0877008	0.0982339	0.0258489	0.00362122	0.112206
14	Kanagawa	10	Furniture and fixtures	0.20409	0	0	0	17.0197	0.589905	0.193001	3.40226	0.146891	113.677	0.210974	5.16241	9.11805	0	0.267305	0	0.255795	0	0	7.13165	1.03809	0	0	5.58043	1.59133	0.181511	1.76671	0.0554474	1.04575	0	2.10353	0.445067	0	0	0.23231	0.297072	1.45487	1.88942	4.15709	1.44597	1.59206	2.49918	3.90898	0.448841	0.259376	24.0365
14	Kanagawa	11	Pulp, paper, paperboard, building paper	0.0287379	0	0	0	1.5977	0.0332258	0.235529	0.067238	0.475725	3.60476	42.7486	131.194	127.42	0	0.401484	0	0	0.0506531	0	3.90367	0.0365431	0	0	1.17867	0.330216	0.163575	0	0	0.523562	0	0.148099	0	0.115635	0	0.0654232	0	0.0292658	0.0354733	0	0.111058	0	2.41581	0.0366949	0.0316006	0.0243484	1.04785
14	Kanagawa	12	Paper products	19.6217	0	0	0	655.583	60.6086	1.04625	7.76567	0.210782	29.0577	0	23.5075	30.423	0.122108	1.61952	0	0.244703	0	0	404.156	18.496	0	0	11.0409	2.96454	7.84857	4.60937	0.68956	1.16714	0	0	0	0.392803	0	0.074079	0	9.64311	3.13299	0.271147	2.76654	3.37242	4.717	4.86133	1.61017	0.744386	16.8007
14	Kanagawa	13	Publishing, printing	0.357198	0	0.00862912	0	252.447	5.23108	0.225193	11.2128	0.257088	7.38854	0.0205136	84.0076	3377.86	0	0.658436	0	0	0	0	84.9699	1.56451	0.0295031	0.0663538	0.739913	1.20527	2.37202	0.499732	0	0.406726	0	1.43173	0.562579	0.106466	0.0247191	0.39153	0.808788	8.97274	7.7895	6.945	3.1698	24.0605	3.09993	8.00707	0.305495	1.1433	44.9484
14	Kanagawa	14	Chemical fertilizer	22.6139	0	0	0	0	0.121044	0	0	0	0	0	0	0	1.57147	5.39346	0	0.852915	0.0922662	0	9.37784	2.72915	0	0	0	0	0	0	0	0.0596053	0	6.20463	0	0	0	0	0	0	0	0	0	0	0	0	0.0575615	0	0
14	Kanagawa	15	Basic inorganic chemical products	0	0	0	0	113.613	3.41279	5.64489	0.0575529	0	0.489765	1.47483	3.98215	0.428868	0.984602	87.3739	0	10.0507	0.173428	0	396.317	59.9313	0	0	21.7676	76.4774	19.1118	3.09726	0	0.280092	0	30.1704	0.321857	0.131972	0.122564	0.149332	3.29409	2.70543	2.06473	2.09527	2.78846	1.20615	3.06104	6.15622	2.65078	0	7.96464
14	Kanagawa	16	Basic organic chemical products	0	0	0	0	0	0	0	0	0	0	0	0	3.72034	0	0	0	4.41287	0	0	60.072	1.49238	0	0	0	0.175139	0	0	0	0	0	0	0	0	0	0	0	0	0.263398	0	0	0	0	0	0	0	0
14	Kanagawa	17	Organic chemical products	22.3224	0	0	0	209.595	37.1641	66.0494	0.348185	1.92795	1.77779	8.61478	3.61369	24.6484	0	31.1856	0	344.312	22.2956	0	2794.91	588.33	0	0.995197	389.891	505.668	4.55292	0	0	1.6945	0	0	0	0	0.185373	3.38787	0.433232	3.03099	13.5934	0.275565	3.45061	49.0886	6.69826	1.52016	0.818201	5.04343	5.4262
14	Kanagawa	18	Synthetic resins	0	0	0	0	0	0	0.43619	0	0	1.92858	2.14564	5.60027	1.20627	0	0	0	0	0	0	385.193	0	0	0	548.105	0	0	0	0	0.551468	0	0	0	0	0	0.315018	0	0	0	0	0.534754	1.85046	17.0363	0	0.684718	0.703439	15.3383
14	Kanagawa	19	Synthetic fibers	0	0	0	0	0	0	0.00911579	0.0304977	0	0.000642136	8.33476e-05	0	0	0	0	0	0	0	0	0	0	0	0.000179732	0.000868483	0.00017647	0	0	0	0	0	0	0	0	0	0	0	0	0	0	0	0	0	0	0	0	0
14	Kanagawa	20	Final chemical products	26.0357	0	0.929367	0	186.127	10.3334	15.4341	21.3659	38.037	85.8811	24.3028	399.464	6901.2	0	69.8964	0	12.9066	0	0	3391.64	225.078	2.88865	22.7385	131.85	46.5653	2.76482	18.9599	0	30.3094	0	9.01162	3.38967	1.04241	0	3.83348	9.05012	57.7767	23.9834	22.3064	17.0195	177.549	29.5798	25.0574	13.46	0.658476	70.5618
14	Kanagawa	21	Medicaments	56.2158	0	0	0	3.2488	0	0	0.0444351	0	0	0	0	0	0	0	0	0	0	0	15.2544	91.3353	0	0	0	0	0	0	0	0	0	0	0	0	0	0	0	0	0	0	0	0	0	0	0	0	0
14	Kanagawa	22	Petroleum refinery products	180.546	0	0.167396	0	456.577	4.0057	14.8044	2.4769	1.38535	7.66472	5.17327	14.8009	458.492	0.481525	37.9829	0	20.2645	0	0	102.31	3.67137	37.7738	144.81	5.26297	13.5863	36.9761	17.5709	1.67338	17.9718	0	110.104	2.51849	0	1.67834	4.3819	12.3276	40.3793	18.5322	6.41553	4.46305	1.71599	6.6251	5.89858	11.4293	0	8.42195
14	Kanagawa	23	Coal products	0	0	0	0	0	0	0	0	0	0	0.0875045	0	0	0	0.344924	0	0.424379	0	0	0.0555484	0	0	0	0	0	0	0	0	1.18877	0	15.7044	5.53795	0	0.702956	0.256944	0.0821434	0	0	0.208995	0.0726953	0	0	0	0	0	0.0823073
14	Kanagawa	24	Plastic products	11.1281	0	0	0	227.153	27.678	0.412685	11.5961	1.74993	28.5801	2.07835	96.8868	860.64	0.116971	2.53122	0	0.0586023	0	0	128.131	20.3339	0	0	630.052	44.0557	1.69663	0.441546	0	0.745359	0	0	0	0	0.0582425	7.0253	2.99459	5.80911	6.92583	60.433	7.70953	50.5424	35.1581	24.299	32.751	2.13921	198.105
14	Kanagawa	25	Rubber products	22.0981	0	0.0478068	0	19.7472	0.38133	0.346558	5.33749	0.237385	3.28345	0.227298	4.44948	24.0797	0	0.0959959	0	0.206691	0	0	2.81366	1.18831	0	0.367611	2.73283	92.6713	0	6.40238	0	2.62889	0	9.34844	0.119876	0.14746	0	0.0834285	6.40117	4.59038	54.4189	49.0626	8.78061	64.4443	26.4889	23.3033	5.01704	1.11778	59.7299
14	Kanagawa	26	Glass and glass products	0.2562	0	0	0	66.1047	185.131	0	0	0	84.4223	0	0	0.837522	0	2.46074	0	0	0	0	244.114	29.9721	0	0	26.1105	1.26167	29.8036	0.403236	0	3.79241	0	0	0	0	0	0	1.86461	3.13087	3.4787	0.474409	0	17.7015	1.0175	34.5129	16.4807	0.86827	8.96801
14	Kanagawa	27	Cement and cement products	0	0	0	0	0	0	0	0	0	0	0	0	0	0	0	0	0	0	0	0	0	0	0	0	0	0	65.2087	0	0.0396434	0	0	0	0	0	0	0	0	0	0	0	0	0	0	0	0	0
14	Kanagawa	28	Pottery, china and earthenware	0	0	0	0	0.524156	0	0	0	0	0.499154	0	0	0	0	0.0145934	0	0	0	0	0.0164514	0	0	0	0.0207724	0	0	0.0263053	0.0454069	0	0	0	0	0	0	0	0	0.0340407	0.0206305	0	0	0	0.641644	0.0426818	0.0091891	0	0.585033
14	Kanagawa	29	Other ceramic, stone and clay products	0.273989	0	0	0	1.04154	0	0	0	0	0.454603	0.0786751	0	0.0995194	0	2.3392	0	0	0	0	0.389559	0.23227	0	2.85022	0.378367	0.0999462	1.12633	80.4492	0.181958	9.87936	0	1.17665	0.929442	0	0.0189608	0.207916	0.664695	2.41819	19.8789	2.95954	2.35297	0.203555	2.31735	0.932937	0.903846	0.0257933	1.57625
14	Kanagawa	30	Pig iron and crude steel	0	0	0	0	0	0	0	0	0	0	0	0	0	0	0.0194508	0	0	0	0	0	0	0	0	0	0	0	0	0	0	0	-26.0021	7.54187	-6.46868	0	0	-0.648506	-6.76029	-2.15854	-4.61994	-0.358697	-0.260659	-0.619293	-0.00711106	-0.0367431	-0.0377476	-0.316778
14	Kanagawa	31	steel products	0.183885	0	0	0	0	0	0	0	0.661743	87.0456	0	0	0	0	0	0	0	0	0	0	0	0	0	9.02747	10.7912	0	24.6006	0	0.418764	0	1962.56	23.2583	1277.71	0	0.767474	144.136	605.421	197.021	213.495	65.3776	36.9882	149.772	23.1864	27.7017	3.97285	33.7256
14	Kanagawa	32	Cast and forged steel products	0	0	0	0	0	0	0	0	0	0.510518	0	0	0	0	0	0	0	0	0	0	0	0	0	0	0	0	0	0	0.029196	0	0	0	0	0	0.0389149	5.82231	4.49122	53.8687	27.3481	28.6698	7.08634	10.6584	2.12811	0.366534	0.0434487	0.598352
14	Kanagawa	33	Other iron or steel products	0	0	0	0	0	0	0	0	0	101.29	0	0	0	0	0.0991516	0	0	0	0	0.167663	0	0	0	0.141133	0	0	1.87662	0	0.646501	0	0	1.60962	0	0	0.215428	162.976	315.526	123.699	83.1624	15.5055	23.3476	31.7943	0.36249	7.74173	3.60789	45.2556
14	Kanagawa	34	Non-ferrous metals	0	0	0	0	0	0	0	0	0	1.72396	0.0298354	0	-21.2602	0	32.963	0	0.868174	0	0	93.4675	0	0	0	1.79357	-0.0473774	2.87492	0	0.156825	2.7277	0	281.709	0.818224	-0.619382	52.5975	372.112	-3.10883	58.3139	-4.34641	7.32184	4.46149	-1.35087	19.0278	2.91141	226.792	0.097814	9.00834
14	Kanagawa	35	Non-ferrous metal products	0	0	0	0	9.70347	0.517761	0	0	0.128926	23.4501	0	0.724968	9.46687	0	0.391023	0	0	0	0	2.55668	0.170837	0	0	6.90165	4.63121	0.159313	0	0	0.662896	0	0	0	0	0.613617	68.8499	38.1985	67.9517	87.7819	50.501	46.3808	25.0525	99.1831	80.1119	149.749	2.73185	368.639
14	Kanagawa	36	Metal products for construction and architecture	0.0643344	0	0	0	0	0	0	0	0	0.640462	0	0	0	0	0	0	0	0	0	0	0	0	0	0	0	0	0	0	0	0	0	0	0	0	0	10.7691	1.6379	0.397062	0	0.331494	0	0	0	0	0	0.140747
14	Kanagawa	37	Other metal products	3.34494	0	0.0538709	0	134.219	79.3513	0	19.348	16.5848	144.175	0.832423	8.52361	16.7395	0	5.51681	0	1.08691	0	0	112.311	11.2637	0.36837	1.86409	8.62254	57.7548	3.79022	7.60448	0	19.5374	0	0	3.7823	0.166164	0	2.82033	221.444	507.425	269.602	196.713	99.7419	164.428	86.1847	63.1962	12.4648	4.51345	123.139
14	Kanagawa	38	General industrial machinery	0	0	0	0	0	0	0	0	0	1.56949	0	0	0	0	0	0	0	0	0	0	0	0	0	30.6385	0	0.101974	0.225578	0	1.87675	0	0	1.09393	1.53787	0	0.217521	0.834482	6.27611	2757.92	366.907	78.0963	100.942	30.0732	28.4575	0.472801	1.82148	5.53947
14	Kanagawa	39	Special industrial machinery	0	0	0	0	0	0	0	0	0	0	0	0	0	0	0	0	0	0	0	0	0	0	0	0	0	0	0	0	0	0	0	0	0	0	0	0	0	10.567	4344.08	0	0.596247	0	0.341592	2.64752	0	0
14	Kanagawa	40	Other general machines	0	0	0	0	0	0	0	0	0	8.9655	0	0	0	0	0	0	0	0	0	0.547203	0	0	0	1.52004	0	0.0791063	0	0	0.443099	0	0	0.606154	0	0	0.168742	1.13286	3.39677	214.234	156.263	432.39	17.2224	19.4288	13.4869	1.22259	0.942009	11.7566
14	Kanagawa	41	Machinery for office and service industry	0	0	0	0	0	0	0	0	0	0	0	0	0	0	0	0	0	0	0	0	0	0	0	0	0	0	0	0	0	0	0	0	0	0	0	0	0	0	0	0	316.78	0	0	0	0	0
14	Kanagawa	42	Industrial electric equipment	1.87445	0	0	0	0	0	0	0	0	0.329303	0	0	0	0	0	0	0	0	0	0	0	0	0	0	0	0	0	0	0	0	0	0	0	0	0	0	0	123.718	152.415	1.27832	111.57	539.643	173.806	26.7345	3.92364	117.959
14	Kanagawa	43	Applied electric equipment and electric mesuring instruments	0	0	0	0	0	0	0	0	0	0	0	0	0	0	0	0	0	0	0	0	0	0	0	0	0	0	0	0	0	0	0	0	0	0	0	0	0	47.0151	197.027	13.0538	34.6572	263.908	1811.06	0	0	45.1039
14	Kanagawa	44	Other electric equipment	2.40883	0	0.043644	0	0	0	0	0	0	1.79853	0	0	0	0	0	0	0	0	0	1.18554	0	0	0	0	0	0	0	0	0	0	0	0	0	0	0	0	3.67961	11.6458	33.4535	6.98171	29.3046	74.673	44.4707	272.272	2.55112	292.333
14	Kanagawa	45	Household electric and electric applications	0	0	0	0	0	0	0	0	0	0	0	0	0	0	0	0	0	0	0	0	0	0	0	0	0	0	0	0	0	0	0	0	0	0	0	0	0	0	0	0	0	0	0	0	4.17821	0
14	Kanagawa	46	Communication equipment	0	0	0	0	0	0	0	0	0	0	0	0	0.898851	0	0	0	0	0	0	0	0.26223	0	0	0	0	0	0	0	0	0	0	0	0	0	0	0	0	5.09105	0.954654	0	0	0.136501	11.0594	0.113381	0	191.291
14	Kanagawa	47	Electric computing equipment and accessory equipment	0	0	0	0	0	0	0	0	0	0	0	0	0	0	0	0	0	0	0	0	0	0	0	0	0	0	0	0	0	0	0	0	0	0	0	0	0	0	22.8744	0	0	0	0	0	0	4.42874
14	Kanagawa	48	Semiconductor devices and integrated circuits	0	0	0	0	0	0	0	0	0	0	0	0	0	0	0	0	0	0	0	0	0	0	0	0	0	0	0	0	0	0	0	0	0	0	0	0	3.84604	13.9854	90.9129	24.6724	1506.41	935.474	6185.18	46.5715	55.9966	8034.18
14	Kanagawa	49	Other electrical equipment	0	0	0	0	0	0	0	0	0	0	0	0.127655	6.18664	0	0	0	0	0	0	0	0	0	0	0	0	0	0	0	0	0	0	0	0	0	0.0957417	0	0.25697	18.377	38.6066	1.05641	156.628	109.944	940.302	2.91344	5.29136	1228.71
14	Kanagawa	50	Passenger motor cars	0	0	0	0	0	0	0	0	0	0	0	0	0	0	0	0	0	0	0	0	0	0	0	0	0	0	0	0	0	0	0	0	0	0	0	0	0	0	0	0	0	0	0	0	0	0
14	Kanagawa	51	Other cars	0	0	0	0	0	0	0	0	0	0	0	0	0	0	0	0	0	0	0	0	0	0	0	0	0	0	0	0	0	0	0	0	0	0	0	0	0	0	0	0	0	0	0	0	0	0
14	Kanagawa	52	Motor vheicle parts and accessories	0	0	0	0	0	0	0	0	0	0	0	0	0	0	0	0	0	0	0	0	0	0	0	0	0	0	0	0	0	0	0	0	0	0	0	0	0	0	0.534448	0	0	0	0	0	0	0
14	Kanagawa	53	Other transportation equipment	39.1074	0	0	0	0	0	0	0	0	0	0	0	0	0	0	0	0	0	0	0	0	0	0	0	0	0	0	0	0	0	0	0	0	0	0	0	0	0	0	0	0	0	0	0	0	0
14	Kanagawa	54	Precision instruments	10.7269	0	0	0	0	0	0.0901692	0.0836588	0.10294	0	0.147849	0.289422	0.311701	0	0	0	0	0	0	0.42235	0.181871	0	0	1.59984	0	0	0	0	0	0	0	0	0	0	0.108534	0.208186	0.291305	36.1919	99.5804	0.552722	31.0803	16.2833	27.1199	0.0786361	0.121179	32.6462
14	Kanagawa	55	Miscellaneous manufacturing products	6.60992	0	0.0798406	0	14.4829	2.26434	0.23151	153.077	2.0263	31.4392	0.253069	2.22928	4.80176	0	0	0	0.383541	0	0	3.13267	0	0	1.02323	1.52133	0.904191	3.22237	1.15594	0.332553	8.08394	0	0	3.33669	0.164178	0	1.4862	2.85077	1.99447	25.5349	8.04646	1.26144	0	1.29636	5.47042	0.336498	0.103709	22.0483
14	Kanagawa	56	Reuse and recycling	0	0	0	0	0	3.08083	0	0	0	0	0.126089	0	0	0	0.114696	0	0	0	0	0	0	0	0	3.35849	0.0154019	0.186921	0.236281	0.0101964	0.0106837	0	0.628591	2.78273	0.251694	1.7882	4.15812	0	0	0	0	0	0	0	0	0	0	0
14	Kanagawa	57	Building construction and repair of construction	0	0	0	0	0	0	0	0	0	0	0	0	0	0	0	0	0	0	0	0	0	0	0	0	0	0	0	0	0	0	0	0	0	0	0	0	0	0	0	0	0	0	0	0	0	0
14	Kanagawa	58	Public construction	0	0	0	0	0	0	0	0	0	0	0	0	0	0	0	0	0	0	0	0	0	0	0	0	0	0	0	0	0	0	0	0	0	0	0	0	0	0	0	0	0	0	0	0	0	0
14	Kanagawa	59	Other civil enginnering and construction	0	0	0	0	0	0	0	0	0	0	0	0	0	0	0	0	0	0	0	0	0	0	0	0	0	0	0	0	0	0	0	0	0	0	0	0	0	0	0	0	0	0	0	0	0	0
14	Kanagawa	60	Electricity	11.9299	0	0.663303	0	422.304	29.3233	5.25333	17.6317	8.65194	24.7049	11.7204	30.4068	292.196	0.113912	13.3589	0	4.96508	0.0401289	0	89.7305	7.70086	8.39438	5.32885	90.6047	55.7224	6.30127	28.595	0.395864	11.0436	0	147.951	28.5978	16.1844	13.1873	7.32534	24.2582	90.1907	74.1357	76.3483	35.3694	20.3987	34.6607	16.2215	8.46181	5.78687	60.8328
14	Kanagawa	61	Gas supply and heat supply	1.50308	0	0	0	2879.75	284.131	27.4806	16.7045	2.16364	34.4159	7.76886	153.601	49.1358	0	14.4367	0	9.41936	0	0	252.998	91.2652	0	3.76939	306.371	72.7861	104.537	42.5828	4.49193	10.6968	0	776.536	53.2645	3.02403	7.9573	18.82	75.4815	266.34	115.032	77.2357	35.8201	56.9507	91.0344	33.5869	60.7405	2.54699	249.915
14	Kanagawa	62	Water supply and waste management services	1.13331	0	0.0182522	0	157.188	17.8103	2.46102	1.15394	0.725052	3.13398	2.03934	6.28546	27.9919	0	2.01577	0	1.34151	0.0369918	0	35.9867	10.7283	0.468033	0.421052	7.9296	4.09966	0.940736	24.3777	0.0684219	3.87136	0	15.4663	0.457677	0.731884	0.967281	0.796306	4.15465	7.69419	24.818	20.6359	6.32622	7.85839	6.75141	4.63609	1.26928	0.99577	10.1625
14	Kanagawa	63	Commerce	60.5316	0	0.155054	0	1522.77	70.759	6.1037	98.9508	16.845	101.481	16.71	200.987	786.734	0.108126	10.5292	0	4.5233	0.209499	0	239.863	38.6921	1.02813	9.97187	122.504	68.1816	6.1888	109.047	0.328788	12.3774	0	123.453	10.6979	84.5509	2.59772	12.6602	55.2689	109.334	198.92	240.701	64.9745	151.602	104.966	219.236	46.8971	5.91407	371.217
14	Kanagawa	64	Financial and insurance	0	0	0	0	0	0	0	0	0	0	0	0	0	0	0	0	0	0	0	0	0	0	0	0	0	0	0	0	0	0	0	0	0	0	0	0	0	0	0	0	0	0	0	0	0	0
14	Kanagawa	65	Real estate agencies and rental services	14.1495	0	0.0307639	0	66.966	5.9711	1.20426	25.243	0.560115	23.8056	2.85222	46.0986	78.4793	0	2.16209	0	0.354684	0	0	14.067	8.59143	0.210364	1.89248	60.8471	15.6199	1.05707	64.8059	0.115325	1.97365	0	16.5889	4.01133	2.94162	1.01346	0.8053	7.51752	22.8389	38.25	39.3013	23.6039	8.04176	31.7969	25.3393	9.56878	0.899122	28.9434
14	Kanagawa	66	House rent	0	0	0	0	0	0	0	0	0	0	0	0	0	0	0	0	0	0	0	0	0	0	0	0	0	0	0	0	0	0	0	0	0	0	0	0	0	0	0	0	0	0	0	0	0	0
14	Kanagawa	67	Transport	300.62	0	8.09976	0	961.84	96.7526	8.15847	59.4543	40.6428	85.8857	10.8235	135.378	995.976	0	16.23	0	3.39131	0	0	231.909	59.3896	8.6286	3.54031	115.12	40.8115	13.9505	948.889	0.426154	159.765	0	273.023	9.57789	46.8114	6.78983	16.0098	109.937	174.276	236.025	185.167	108.203	114.408	87.9936	202.743	22.4229	3.38894	432.79
14	Kanagawa	68	Communication	26.3647	0	0.174517	0	30.19	1.85604	0.856374	18.2022	0.177757	24.1567	0.989309	27.1128	167.26	0	1.40172	0	0.193466	0	0	29.051	75.4516	2.3408	2.47745	28.7772	29.4433	2.0867	4.95615	0	1.68732	0	10.6595	3.16421	0.745333	3.19182	3.04553	22.4685	23.7679	83.1505	38.1298	24.9745	23.6697	32.8998	30.6292	4.03972	0.627756	48.5388
14	Kanagawa	69	Broadcasting	0.0211323	0	0	0	0.301246	0.0244324	0	0.0370823	0	0.0841504	0	0.128288	0.690817	0	0	0	0	0	0	0.187209	0	0.0471268	0	0.210116	0.069378	0.00751775	0.0665206	0	0	0	0.163355	0	0.0283439	0.0263234	0	0.03076	0.0860818	0.20868	0.136958	0.0816659	0.117748	0.0839267	0.134917	0.0116187	0	0.200339
14	Kanagawa	70	Information services	99.472	0	0.534005	0	390.737	51.1138	3.56139	22.6988	6.89418	183.382	6.60123	178.427	652.224	0	5.36141	0	2.61658	0	0	138.045	200.664	0.182577	5.33811	224.67	83.0535	16.5139	97.0285	0.800729	11.4663	0	84.804	14.9971	38.8724	9.1783	13.7922	49.6936	170.083	363.202	445.476	158.51	189.405	391.638	792.816	142.33	2.08095	842.536
14	Kanagawa	71	﻿Internet based services	1.04531	0	0	0	4.84286	0.90641	0.123564	1.94892	0.235107	5.008	0.13507	4.09831	18.0111	0	0.171135	0	0	0	0	1.54338	11.8798	0.048565	0.109225	8.7694	1.28692	0.371865	2.67348	0	0.260366	0	1.17839	0.569885	0.0876268	0.0813803	0.545345	3.32837	4.32456	8.62885	5.14146	2.52475	3.13063	7.17851	4.21274	0.754315	0.0553527	19.2954
14	Kanagawa	72	Image information production and distribution industry	0.191441	0	0.0121999	0	1.54802	0.0343455	0.04578	0.700831	0.026132	0.545463	0.0238842	0.995207	4.43831	0	0.069169	0	0.0103423	0	0	0.942203	0.205662	0.00245362	0.0331099	0.463562	0.661017	0.0716273	1.41305	0.00179348	0.101476	0	0.348704	0.0323909	0.0575525	0.0123346	0.0200379	0.245029	0.92773	0.635591	0.586749	0.276372	0.610597	0.930721	1.53201	0.21777	0.0279655	1.87749
14	Kanagawa	73	Public administration	0	0	0	0	0	0	0	0	0	0	0	0	0	0	0	0	0	0	0	0	0	0	0	0	0	0	0	0	0	0	0	0	0	0	0	0	0	0	0	0	0	0	0	0	0	0
14	Kanagawa	74	Education and Research	65.6918	0	2.19734	0	4493.94	418.98	40.9598	282.485	14.0283	1050.67	17.1634	800.516	302.849	7.22375	603.849	0	180.954	7.63433	0	14200.1	10935.1	5.36623	63.9653	7592.15	4085.25	895.495	1771.31	20.0045	243.718	0	1525.28	92.0934	2.90472	356.09	352.237	695.613	631.492	6340.9	11668.3	949.442	9778.3	11640.4	19937.3	3959.06	274.619	28748.6
14	Kanagawa	75	Medical service, health and social security and nursing care	4.5705	0	0.156903	0	61.7244	11.681	0.454965	19.2766	0.692537	9.33952	1.24333	21.4182	25.9502	0	2.31045	0	0.301495	0	0	43.0944	30.7416	0.178818	1.60868	33.784	27.2461	1.88267	46.1902	0.130707	0.547814	0	11.7769	2.09833	7.09816	0.449466	0.547629	6.65279	21.0675	78.3898	51.6704	49.2698	65.9454	18.1517	20.2723	2.11612	0.40762	78.9402
14	Kanagawa	76	Advertising and survery	11.4943	0	0.0321574	0	57.5144	23.073	0.119887	1.42128	0.26613	15.0292	2.9541	32.3667	6.11284	0.0132146	0.710291	0	0.0397231	0	0	215.987	18.9015	0.0235599	0	21.6387	12.0613	0.360799	1.56301	0.0574039	0.697707	0	3.91995	0.506849	0.297567	0.0394793	0.240507	2.19902	3.01242	10.0804	9.0477	7.86599	8.81807	8.10473	14.9061	2.38728	0.608663	29.2991
14	Kanagawa	77	Giids rental and leasing services	15.8525	0	0.18501	0	136.667	6.74097	2.14586	7.24475	2.13222	32.065	2.00361	43.1757	215.943	0	4.01769	0	0.335753	0	0	24.7866	3.70701	0.679406	10.0638	75.2064	29.5401	3.75593	61.409	0.222619	4.77282	0	21.52	4.19241	6.97474	0.824415	3.87437	17.0653	58.2202	200.425	154.008	86.3113	69.4699	147.216	114.73	21.2611	1.68224	273.521
14	Kanagawa	78	Other business services	80.6056	0	1.23293	0	1148.09	53.6993	10.9806	132.362	19.9213	257.804	12.0729	450.264	4059.18	0.168886	41.2621	0	3.21524	0.23798	0	328.266	169.285	6.02202	18.9613	731.979	404.703	72.6247	630.292	0.66027	38.3578	0	118.982	55.5016	17.385	26.2368	24.7948	152.704	272.383	783.477	601.659	210.624	396.771	460.436	1019.32	128.721	17.1592	873.254
14	Kanagawa	79	Personal services	35.1809	0	0	0	15.2779	0.538741	0	2.52117	0.251533	2.31942	0	3.77173	28.3075	0	0.203434	0	0	0	0	5.16003	1.55539	0	0	6.08096	2.10348	0.207211	4.4004	0	0.0663228	0	2.70152	0.254041	0.937486	0	0.176801	1.18697	3.32172	5.89562	4.85352	2.25094	3.3753	7.24821	4.61118	1.47312	0	9.51467
14	Kanagawa	80	Activities not elsewhere classified	0	0	0	0	0	0	0	0	0	0	0	0	0	0	0	0	0	0	0	0	0	0	0	0	0	0	0	0	0	0	0	0	0	0	0	0	0	0	0	0	0	0	0	0	0	0
15	Niigata	1	Agriculture, forestry and fishery	82.8403	0	0	0	2424.66	67.2549	6.25793	0.256151	70.497	0	0.26407	0.147695	0	0	0.382375	0	0.228694	0	0	3.59215	4.96535	0	2.0744	0	410.347	0	0	0	1.20505	0	0	0	0	0	0.055386	0	0	0	0	0	0	0	0	0	0	0
15	Niigata	2	Metallic ores	0	0	0	0	0	0	0	0	0	0	0	0	0	0	0	0	0	0	0	0	0	0	0	0	0	0	0	0	0	0	0	0	0	0	0	0	0	0	0	0	0	0	0	0	0	0
15	Niigata	3	Non-metallic ores	0	0	0.375801	0	0	0	0	0	0	0	0.989958	0	0	0	3.34475	0	0.05855	0	0	0.965639	0.237611	-0.72925	0.390504	0	1.30362	93.7298	31.91	0.913793	15.8513	0	0	0.611239	0	0.0581905	0.0354496	0.271992	0.523305	0	0	1.80531	0	0	0	0	0	0
15	Niigata	4	Coal mining, crude petroleum and natural gas	0	0	0	0	0	0	0	0	0	0	0.238491	0.02259	0	0.0418909	0.0162457	0	0.0209873	0	0	0.0622676	0.00473179	23.5952	0	0	0.0183249	0.133702	0.995643	0.0121315	0.163128	0	0.565708	0.0040574	0	0.0208585	0.00282377	0.00541645	0	0	0	0.00958689	0	0	0	0	0	0
15	Niigata	5	Food and Tobacco	24.3625	0	0	0	5546.96	153.84	0	4.80203	0.0383687	0	0.22043	0	0	0	0.0465477	0	0.0334076	0	0	24.7677	5.35528	0	0	0.0662563	0	0	0	0	0.182104	0	0	0	0	0	0	0	0	0	0	0	0	0	0	0	0	0
15	Niigata	6	Beverage	0.821569	0	0	0	2.78152	12.5179	0	0	0	0	0	0	0	0	0	0	0.00919381	0	0	0	0.00932774	0	0	0	0	0	0	0	0	0	0	0	0	0	0	0	0	0	0	0	0	0	0	0	0	0
15	Niigata	7	Textile products	3.84943	0	0	0	0	0.0729602	34.6522	516.913	0	8.54388	0.61972	3.95865	6.80764	0	0	0	0	0	0	0.0621162	0	0	0	2.35293	35.8934	0.157147	0	0	0.934119	0	0	0	0	0	0.191549	0.0918557	0.514116	0.311582	6.54377	0	0	0	0	0.0346957	0.588131	0.920389
15	Niigata	8	Wearing aparel and other textile products	35.3635	0	0.109615	0	95.4841	2.24832	8.76349	43.7712	2.43637	7.31347	0.781752	17.9266	13.6558	0	0.56599	0	0.18054	0	0	11.0595	2.10645	0	4.21445	2.59594	5.5567	1.46046	6.34807	0	3.2804	0	7.05217	0.706788	2.22185	0.0897158	1.03844	2.41125	8.87491	13.4244	7.86864	10.7623	7.46441	23.3123	12.8751	1.82155	0.549201	34.1399
15	Niigata	9	Timber and wooden products	1.4545	0	0	0	7.02138	0.305754	0	0.50273	57.2678	114.852	13.8225	44.6177	0.64838	0	0	0	0	0	0	0.683313	0	0	0	0.739531	0.0271317	1.16423	0.0520286	0.143695	0.583426	0	0	0.504618	0	0	1.10375	1.34729	2.92878	0.652871	0.765148	0.255497	3.24178	0.678307	0.759774	0.199924	0.0280077	0.86784
15	Niigata	10	Furniture and fixtures	0.0760372	0	0	0	6.34098	0.219779	0.0719057	1.26757	0.0547266	42.3522	0.0786017	1.92334	3.39708	0	0.0995888	0	0.0953007	0	0	2.65701	0.386756	0	0	2.07908	0.592877	0.0676251	0.658217	0.0206578	0.389611	0	0.783703	0.165817	0	0	0.086551	0.110679	0.542037	0.703936	1.54879	0.538719	0.593148	0.931109	1.45635	0.167223	0.0966346	8.95517
15	Niigata	11	Pulp, paper, paperboard, building paper	0.104786	0	0	0	5.82563	0.12115	0.858803	0.245168	1.73462	13.1439	155.873	478.369	464.609	0	1.46392	0	0	0.184695	0	14.2338	0.133246	0	0	4.29774	1.20406	0.596438	0	0	1.90905	0	0.540007	0	0.421637	0	0.23855	0	0.106711	0.129345	0	0.404947	0	8.80867	0.133799	0.115224	0.0887809	3.82076
15	Niigata	12	Paper products	3.59	0	0	0	119.946	11.089	0.191423	1.42081	0.0385649	5.31642	0	4.30096	5.56621	0.0223409	0.296309	0	0.0447711	0	0	73.9446	3.38404	0	0	2.02005	0.542394	1.43598	0.843334	0.126162	0.21354	0	0	0	0.0718675	0	0.0135535	0	1.76431	0.573214	0.0496093	0.506167	0.61702	0.863026	0.889432	0.294598	0.136193	3.07387
15	Niigata	13	Publishing, printing	0.07068	0	0.00170747	0	49.9526	1.03509	0.0445598	2.21871	0.0508709	1.46199	0.0040591	16.6229	668.388	0	0.130287	0	0	0	0	16.8133	0.309575	0.00583787	0.0131296	0.146409	0.23849	0.469359	0.0988836	0	0.0804802	0	0.283301	0.111319	0.0210667	0.00489125	0.0774733	0.160038	1.77547	1.54133	1.37423	0.627219	4.76093	0.613393	1.58439	0.0604494	0.226229	8.89408
15	Niigata	14	Chemical fertilizer	22.4675	0	0	0	0	0.12026	0	0	0	0	0	0	0	1.5613	5.35854	0	0.847393	0.0916688	0	9.31712	2.71148	0	0	0	0	0	0	0	0.0592194	0	6.16446	0	0	0	0	0	0	0	0	0	0	0	0	0.0571888	0	0
15	Niigata	15	Basic inorganic chemical products	0	0	0	0	104.666	3.14403	5.20035	0.0530206	0	0.451196	1.35869	3.66855	0.395094	0.907064	80.4932	0	9.25918	0.15977	0	365.107	55.2117	0	0	20.0534	70.4547	17.6068	2.85335	0	0.258034	0	27.7944	0.29651	0.121579	0.112912	0.137572	3.03468	2.49238	1.90213	1.93026	2.56886	1.11116	2.81998	5.67141	2.44203	0	7.33742
15	Niigata	16	Basic organic chemical products	0	0	0	0	0	0	0	0	0	0	0	0	1.02571	0	0	0	1.21665	0	0	16.5621	0.411456	0	0	0	0.0482865	0	0	0	0	0	0	0	0	0	0	0	0	0.07262	0	0	0	0	0	0	0	0
15	Niigata	17	Organic chemical products	3.02457	0	0	0	28.399	5.03553	8.94933	0.0471771	0.261226	0.240881	1.16726	0.489636	3.33973	0	4.22548	0	46.6523	3.02093	0	378.695	79.7156	0	0.134844	52.8281	68.5153	0.616896	0	0	0.229596	0	0	0	0	0.025117	0.459037	0.0587005	0.410683	1.84183	0.0373375	0.467539	6.65124	0.907577	0.205974	0.110862	0.683357	0.73522
15	Niigata	18	Synthetic resins	0	0	0	0	0	0	0.0725564	0	0	0.320802	0.356908	0.931556	0.200653	0	0	0	0	0	0	64.0734	0	0	0	91.1725	0	0	0	0	0.0917318	0	0	0	0	0	0.0524005	0	0	0	0	0.0889516	0.307808	2.83384	0	0.113897	0.117011	2.5514
15	Niigata	19	Synthetic fibers	0	0	0	0	0	0	0.41775	1.39762	0	0.0294272	0.00381958	0	0	0	0	0	0	0	0	0	0	0	0.00823659	0.0398001	0.00808711	0	0	0	0	0	0	0	0	0	0	0	0	0	0	0	0	0	0	0	0	0
15	Niigata	20	Final chemical products	1.10981	0	0.0396158	0	7.93395	0.440477	0.657903	0.910758	1.62139	3.66082	1.03595	17.0278	294.175	0	2.97945	0	0.550163	0	0	144.574	9.59432	0.123133	0.969264	5.62031	1.98492	0.117855	0.808197	0	1.29199	0	0.384135	0.14449	0.0444343	0	0.163408	0.385776	2.46282	1.02233	0.950848	0.725483	7.5683	1.26089	1.06811	0.573754	0.0280686	3.00781
15	Niigata	21	Medicaments	1.43581	0	0	0	0.0829776	0	0	0.00113492	0	0	0	0	0	0	0	0	0	0	0	0.389614	2.3328	0	0	0	0	0	0	0	0	0	0	0	0	0	0	0	0	0	0	0	0	0	0	0	0	0
15	Niigata	22	Petroleum refinery products	1.20565	0	0.00111784	0	3.04893	0.0267493	0.0988612	0.0165403	0.00925108	0.0511835	0.0345461	0.0988378	3.06172	0.00321553	0.253642	0	0.135322	0	0	0.683207	0.0245167	0.252246	0.96701	0.0351451	0.0907264	0.246919	0.117335	0.0111745	0.120012	0	0.735256	0.016818	0	0.0112076	0.0292615	0.0823213	0.269645	0.123754	0.0428417	0.0298034	0.0114591	0.0442411	0.0393895	0.0763226	0	0.0562402
15	Niigata	23	Coal products	0	0	0	0	0	0	0	0	0	0	0.0204076	0	0	0	0.0804425	0	0.0989728	0	0	0.0129549	0	0	0	0	0	0	0	0	0.277242	0	3.66255	1.29155	0	0.163942	0.059924	0.0191573	0	0	0.0487415	0.0169538	0	0	0	0	0	0.0191955
15	Niigata	24	Plastic products	4.37421	0	0	0	89.2887	10.8796	0.162217	4.55814	0.687857	11.2342	0.816952	38.0839	338.298	0.0459785	0.994963	0	0.0230352	0	0	50.3652	7.9928	0	0	247.659	17.3173	0.666905	0.173562	0	0.292983	0	0	0	0	0.0228938	2.76148	1.1771	2.28343	2.72238	23.7548	3.03044	19.867	13.8198	9.55139	12.8736	0.840875	77.8707
15	Niigata	25	Rubber products	3.93268	0	0.00850789	0	3.51429	0.067863	0.0616749	0.949883	0.042246	0.584337	0.0404509	0.791848	4.28533	0	0.0170838	0	0.0367835	0	0	0.500731	0.211476	0	0.0654216	0.486345	16.4922	0	1.13939	0	0.467847	0	1.66369	0.0213337	0.0262425	0	0.0148473	1.13918	0.816923	9.68461	8.73138	1.56263	11.4688	4.71407	4.14715	0.892853	0.198925	10.6298
15	Niigata	26	Glass and glass products	0.00441115	0	0	0	1.13817	3.18751	0	0	0	1.45355	0	0	0.0144201	0	0.042368	0	0	0	0	4.20307	0.516049	0	0	0.449561	0.0217229	0.513147	0.00694276	0	0.0652963	0	0	0	0	0	0	0.0321042	0.0539062	0.059895	0.0081682	0	0.304778	0.0175189	0.59423	0.283758	0.0149495	0.154408
15	Niigata	27	Cement and cement products	0	0	0	0	0	0	0	0	0	0	0	0	0	0	0	0	0	0	0	0	0	0	0	0	0	0	50.5429	0	0.0307274	0	0	0	0	0	0	0	0	0	0	0	0	0	0	0	0	0
15	Niigata	28	Pottery, china and earthenware	0	0	0	0	0.512322	0	0	0	0	0.487884	0	0	0	0	0.0142639	0	0	0	0	0.0160799	0	0	0	0.0203034	0	0	0.0257114	0.0443817	0	0	0	0	0	0	0	0	0.0332721	0.0201647	0	0	0	0.627157	0.0417182	0.00898163	0	0.571824
15	Niigata	29	Other ceramic, stone and clay products	0.285658	0	0	0	1.0859	0	0	0	0	0.473963	0.0820256	0	0.103758	0	2.43882	0	0	0	0	0.406149	0.242162	0	2.9716	0.394481	0.104203	1.1743	83.8754	0.189708	10.3001	0	1.22676	0.969025	0	0.0197683	0.216771	0.693002	2.52118	20.7255	3.08558	2.45317	0.212224	2.41604	0.972668	0.942339	0.0268917	1.64338
15	Niigata	30	Pig iron and crude steel	0	0	0	0	0	0	0	0	0	0	0	0	0	0	0.060427	0	0	0	0	0	0	0	0	0	0	0	0	0	0	0	-80.7797	23.43	-20.096	0	0	-2.01469	-21.0019	-6.70584	-14.3526	-1.11435	-0.809779	-1.92393	-0.0220916	-0.114148	-0.117269	-0.98412
15	Niigata	31	steel products	0.0222782	0	0	0	0	0	0	0	0.080172	10.5458	0	0	0	0	0	0	0	0	0	0	0	0	0	1.0937	1.30738	0	2.98043	0	0.0507344	0	237.769	2.81781	154.798	0	0.0929817	17.4625	73.3485	23.8696	25.8655	7.92068	4.48122	18.1453	2.8091	3.35614	0.481322	4.08596
15	Niigata	32	Cast and forged steel products	0	0	0	0	0	0	0	0	0	0.611151	0	0	0	0	0	0	0	0	0	0	0	0	0	0	0	0	0	0	0.0349511	0	0	0	0	0	0.0465858	6.97	5.37653	64.4872	32.7389	34.3211	8.48319	12.7594	2.5476	0.438785	0.0520132	0.716298
15	Niigata	33	Other iron or steel products	0	0	0	0	0	0	0	0	0	40.9319	0	0	0	0	0.0400679	0	0	0	0	0.0677539	0	0	0	0.057033	0	0	0.758357	0	0.261256	0	0	0.65046	0	0	0.087056	65.8599	127.507	49.9878	33.6066	6.26589	9.43495	12.8483	0.146485	3.1285	1.45798	18.2881
15	Niigata	34	Non-ferrous metals	0	0	0	0	0	0	0	0	0	0.889653	0.0153966	0	-10.9714	0	17.0106	0	0.448023	0	0	48.2341	0	0	0	0.925575	-0.0244492	1.48361	0	0.0809297	1.40764	0	145.377	0.422246	-0.319634	27.1431	192.029	-1.60432	30.093	-2.24298	3.77845	2.30236	-0.69712	9.81932	1.50244	117.037	0.0504772	4.64878
15	Niigata	35	Non-ferrous metal products	0	0	0	0	1.69467	0.0904245	0	0	0.0225164	4.09545	0	0.126612	1.65334	0	0.0682903	0	0	0	0	0.446512	0.0298358	0	0	1.20534	0.80882	0.0278232	0	0	0.115772	0	0	0	0	0.107165	12.0243	6.67119	11.8675	15.3307	8.81977	8.10019	4.37531	17.3219	13.9912	26.153	0.477105	64.3811
15	Niigata	36	Metal products for construction and architecture	0.0575655	0	0	0	0	0	0	0	0	0.573076	0	0	0	0	0	0	0	0	0	0	0	0	0	0	0	0	0	0	0	0	0	0	0	0	0	9.63608	1.46557	0.355286	0	0.296617	0	0	0	0	0	0.125939
15	Niigata	37	Other metal products	2.86185	0	0.0460907	0	114.834	67.8912	0	16.5537	14.1896	123.353	0.712202	7.2926	14.3219	0	4.72005	0	0.929933	0	0	96.0909	9.63697	0.315169	1.59487	7.37725	49.4137	3.24283	6.50622	0	16.7158	0	0	3.23605	0.142166	0	2.41301	189.462	434.141	230.665	168.303	85.3369	140.681	73.7377	54.0693	10.6646	3.8616	105.355
15	Niigata	38	General industrial machinery	0	0	0	0	0	0	0	0	0	0.358697	0	0	0	0	0	0	0	0	0	0	0	0	0	7.00222	0	0.0233054	0.0515543	0	0.428919	0	0	0.250009	0.35147	0	0.049713	0.190715	1.43436	630.302	83.854	17.8484	23.0697	6.87301	6.50377	0.108055	0.416286	1.26601
15	Niigata	39	Special industrial machinery	0	0	0	0	0	0	0	0	0	0	0	0	0	0	0	0	0	0	0	0	0	0	0	0	0	0	0	0	0	0	0	0	0	0	0	0	0	2.57171	1057.22	0	0.145109	0	0.0831334	0.644329	0	0
15	Niigata	40	Other general machines	0	0	0	0	0	0	0	0	0	7.18102	0	0	0	0	0	0	0	0	0	0.438288	0	0	0	1.21749	0	0.0633611	0	0	0.354905	0	0	0.485506	0	0	0.135156	0.907379	2.72068	171.593	125.16	346.328	13.7945	15.5617	10.8025	0.979243	0.754512	9.41661
15	Niigata	41	Machinery for office and service industry	0	0	0	0	0	0	0	0	0	0	0	0	0	0	0	0	0	0	0	0	0	0	0	0	0	0	0	0	0	0	0	0	0	0	0	0	0	0	0	0	26.8126	0	0	0	0	0
15	Niigata	42	Industrial electric equipment	0.433028	0	0	0	0	0	0	0	0	0.0760743	0	0	0	0	0	0	0	0	0	0	0	0	0	0	0	0	0	0	0	0	0	0	0	0	0	0	0	28.5809	35.2103	0.295313	25.7746	124.666	40.152	6.17611	0.906424	27.2504
15	Niigata	43	Applied electric equipment and electric mesuring instruments	0	0	0	0	0	0	0	0	0	0	0	0	0	0	0	0	0	0	0	0	0	0	0	0	0	0	0	0	0	0	0	0	0	0	0	0	0	0.540628	2.26562	0.150106	0.398525	3.03469	20.8255	0	0	0.518651
15	Niigata	44	Other electric equipment	0.658212	0	0.0119257	0	0	0	0	0	0	0.491447	0	0	0	0	0	0	0	0	0	0.323948	0	0	0	0	0	0	0	0	0	0	0	0	0	0	0	0	1.00545	3.1822	9.14115	1.90775	8.00746	20.4044	12.1516	74.3984	0.697094	79.88
15	Niigata	45	Household electric and electric applications	0	0	0	0	0	0	0	0	0	0	0	0	0	0	0	0	0	0	0	0	0	0	0	0	0	0	0	0	0	0	0	0	0	0	0	0	0	0	0	0	0	0	0	0	6.81889	0
15	Niigata	46	Communication equipment	0	0	0	0	0	0	0	0	0	0	0	0	0.0196139	0	0	0	0	0	0	0	0.00572215	0	0	0	0	0	0	0	0	0	0	0	0	0	0	0	0	0.111092	0.0208316	0	0	0.00297859	0.241328	0.0024741	0	4.17418
15	Niigata	47	Electric computing equipment and accessory equipment	0	0	0	0	0	0	0	0	0	0	0	0	0	0	0	0	0	0	0	0	0	0	0	0	0	0	0	0	0	0	0	0	0	0	0	0	0	0	18.5652	0	0	0	0	0	0	3.59444
15	Niigata	48	Semiconductor devices and integrated circuits	0	0	0	0	0	0	0	0	0	0	0	0	0	0	0	0	0	0	0	0	0	0	0	0	0	0	0	0	0	0	0	0	0	0	0	0	1.50056	5.45652	35.4704	9.62614	587.739	364.982	2413.19	18.1702	21.8475	3134.6
15	Niigata	49	Other electrical equipment	0	0	0	0	0	0	0	0	0	0	0	0.16689	8.08815	0	0	0	0	0	0	0	0	0	0	0	0	0	0	0	0	0	0	0	0	0	0.125169	0	0.335951	24.0253	50.4727	1.38111	204.77	143.736	1229.31	3.8089	6.9177	1606.36
15	Niigata	50	Passenger motor cars	0	0	0	0	0	0	0	0	0	0	0	0	0	0	0	0	0	0	0	0	0	0	0	0	0	0	0	0	0	0	0	0	0	0	0	0	0	0	0	0	0	0	0	0	0	0
15	Niigata	51	Other cars	0	0	0	0	0	0	0	0	0	0	0	0	0	0	0	0	0	0	0	0	0	0	0	0	0	0	0	0	0	0	0	0	0	0	0	0	0	0	0	0	0	0	0	0	0	0
15	Niigata	52	Motor vheicle parts and accessories	0	0	0	0	0	0	0	0	0	0	0	0	0	0	0	0	0	0	0	0	0	0	0	0	0	0	0	0	0	0	0	0	0	0	0	0	0	0	0.0225061	0	0	0	0	0	0	0
15	Niigata	53	Other transportation equipment	4.99679	0	0	0	0	0	0	0	0	0	0	0	0	0	0	0	0	0	0	0	0	0	0	0	0	0	0	0	0	0	0	0	0	0	0	0	0	0	0	0	0	0	0	0	0	0
15	Niigata	54	Precision instruments	6.24199	0	0	0	0	0	0.0524697	0.0486813	0.0599011	0	0.0860336	0.168415	0.181379	0	0	0	0	0	0	0.245766	0.105831	0	0	0.930951	0	0	0	0	0	0	0	0	0	0	0.0631563	0.121144	0.169511	21.0602	57.9461	0.32163	18.0857	9.47531	15.7811	0.0457585	0.0705144	18.9969
15	Niigata	55	Miscellaneous manufacturing products	1.04716	0	0.0126486	0	2.29442	0.358724	0.0366766	24.2509	0.321012	4.9807	0.0400919	0.35317	0.76071	0	0	0	0.0607618	0	0	0.496288	0	0	0.162103	0.241015	0.143245	0.510499	0.183127	0.0526841	1.28068	0	0	0.528609	0.0260096	0	0.235448	0.451628	0.31597	4.04533	1.27475	0.199841	0	0.205373	0.866641	0.053309	0.01643	3.49296
15	Niigata	56	Reuse and recycling	0	0	0	0	0	0	0	0	0	0	0	0	0	0	0	0	0	0	0	0	0	0	0	0	0	0	0	0	0	0	0	0	0	0	0	0	0	0	0	0	0	0	0	0	0	0
15	Niigata	57	Building construction and repair of construction	0	0	0	0	0	0	0	0	0	0	0	0	0	0	0	0	0	0	0	0	0	0	0	0	0	0	0	0	0	0	0	0	0	0	0	0	0	0	0	0	0	0	0	0	0	0
15	Niigata	58	Public construction	0	0	0	0	0	0	0	0	0	0	0	0	0	0	0	0	0	0	0	0	0	0	0	0	0	0	0	0	0	0	0	0	0	0	0	0	0	0	0	0	0	0	0	0	0	0
15	Niigata	59	Other civil enginnering and construction	0	0	0	0	0	0	0	0	0	0	0	0	0	0	0	0	0	0	0	0	0	0	0	0	0	0	0	0	0	0	0	0	0	0	0	0	0	0	0	0	0	0	0	0	0	0
15	Niigata	60	Electricity	65.3883	0	3.63558	0	2314.66	160.721	28.7936	96.6398	47.4215	135.408	64.2398	166.66	1601.53	0.624355	73.2202	0	27.2137	0.219947	0	491.815	42.2086	46.0098	29.2076	496.606	305.416	34.5374	156.73	2.16974	60.53	0	810.922	156.745	88.7069	72.2798	40.1503	132.96	494.337	406.339	418.467	193.86	111.806	189.976	88.9104	46.3794	31.718	333.426
15	Niigata	61	Gas supply and heat supply	0	0	0	0	0	0	0	0	0	0	0	0	0	0	0	0	0	0	0	0	0	0	0	0	0	0	0	0	0	0	0	0	0	0	0	0	0	0	0	0	0	0	0	0	0	0
15	Niigata	62	Water supply and waste management services	0.284494	0	0.00458183	0	39.4588	4.4709	0.617786	0.289672	0.182009	0.78672	0.511932	1.57783	7.02677	0	0.506016	0	0.336759	0.00928601	0	9.03371	2.69312	0.11749	0.105696	1.99056	1.02913	0.236152	6.11949	0.0171759	0.971822	0	3.88249	0.11489	0.183724	0.242815	0.199896	1.04294	1.93146	6.23003	5.18021	1.58806	1.97268	1.6948	1.16379	0.318626	0.249967	2.55107
15	Niigata	63	Commerce	49.0266	0	0.125583	0	1233.34	57.3102	4.9436	80.1437	13.6433	82.1929	13.534	162.787	637.203	0.0875753	8.52797	0	3.66357	0.16968	0	194.273	31.338	0.83272	8.07656	99.2204	55.2227	5.01252	88.3207	0.266296	10.0249	0	99.9885	8.66459	68.4807	2.10398	10.2539	44.7642	88.5534	161.112	194.952	52.6251	122.787	85.0157	177.567	37.9835	4.79001	300.661
15	Niigata	64	Financial and insurance	0	0	0	0	0	0	0	0	0	0	0	0	0	0	0	0	0	0	0	0	0	0	0	0	0	0	0	0	0	0	0	0	0	0	0	0	0	0	0	0	0	0	0	0	0	0
15	Niigata	65	Real estate agencies and rental services	0.269545	0	0.000586045	0	1.27569	0.113748	0.0229409	0.480873	0.0106701	0.45349	0.054334	0.878167	1.49501	0	0.0411872	0	0.00675665	0	0	0.267973	0.163665	0.00400739	0.0360512	1.15912	0.297556	0.0201369	1.23454	0.0021969	0.0375976	0	0.316015	0.0764149	0.0560372	0.0193061	0.0153408	0.143207	0.435077	0.728653	0.74868	0.44965	0.153194	0.605723	0.482708	0.182283	0.0171281	0.551366
15	Niigata	66	House rent	0	0	0	0	0	0	0	0	0	0	0	0	0	0	0	0	0	0	0	0	0	0	0	0	0	0	0	0	0	0	0	0	0	0	0	0	0	0	0	0	0	0	0	0	0	0
15	Niigata	67	Transport	71.1237	0	1.91632	0	227.562	22.8907	1.93022	14.0663	9.61569	20.3197	2.56072	32.0291	235.638	0	3.83987	0	0.802351	0	0	54.8674	14.051	2.04144	0.837603	27.2363	9.65562	3.30056	224.498	0.100824	37.7988	0	64.5946	2.26604	11.0751	1.60641	3.78776	26.0101	41.2321	55.8412	43.8086	25.5999	27.0679	20.8184	47.9671	5.30504	0.801791	102.394
15	Niigata	68	Communication	0.169842	0	0.00112425	0	0.194485	0.0119567	0.0055168	0.11726	0.00114512	0.155618	0.00637318	0.174662	1.07749	0	0.00902994	0	0.00124632	0	0	0.187148	0.486063	0.0150796	0.0159598	0.185384	0.189675	0.0134426	0.0319278	0	0.0108698	0	0.0686687	0.020384	0.00480147	0.0205618	0.0196194	0.144743	0.153114	0.535659	0.245634	0.160887	0.152481	0.211942	0.197315	0.0260241	0.00404404	0.312689
15	Niigata	69	Broadcasting	0	0	0	0	0	0	0	0	0	0	0	0	0	0	0	0	0	0	0	0	0	0	0	0	0	0	0	0	0	0	0	0	0	0	0	0	0	0	0	0	0	0	0	0	0	0
15	Niigata	70	Information services	0	0	0	0	0	0	0	0	0	0	0	0	0	0	0	0	0	0	0	0	0	0	0	0	0	0	0	0	0	0	0	0	0	0	0	0	0	0	0	0	0	0	0	0	0	0
15	Niigata	71	﻿Internet based services	0	0	0	0	0	0	0	0	0	0	0	0	0	0	0	0	0	0	0	0	0	0	0	0	0	0	0	0	0	0	0	0	0	0	0	0	0	0	0	0	0	0	0	0	0	0
15	Niigata	72	Image information production and distribution industry	0	0	0	0	0	0	0	0	0	0	0	0	0	0	0	0	0	0	0	0	0	0	0	0	0	0	0	0	0	0	0	0	0	0	0	0	0	0	0	0	0	0	0	0	0	0
15	Niigata	73	Public administration	0	0	0	0	0	0	0	0	0	0	0	0	0	0	0	0	0	0	0	0	0	0	0	0	0	0	0	0	0	0	0	0	0	0	0	0	0	0	0	0	0	0	0	0	0	0
15	Niigata	74	Education and Research	0.451307	0	0.0150959	0	30.8737	2.87842	0.281397	1.94069	0.0963755	7.21818	0.117914	5.49959	2.08059	0.0496276	4.14848	0	1.24317	0.0524484	0	97.5555	75.1249	0.0368664	0.439445	52.1586	28.066	6.15211	12.169	0.137432	1.67436	0	10.4788	0.632688	0.0199556	2.44636	2.41989	4.7789	4.33839	43.5624	80.162	6.52273	67.1776	79.9702	136.97	27.199	1.88665	197.505
15	Niigata	75	Medical service, health and social security and nursing care	0.0499065	0	0.00171327	0	0.673986	0.127548	0.00496788	0.210486	0.007562	0.101981	0.0135762	0.233871	0.283357	0	0.0252284	0	0.0032921	0	0	0.470559	0.335676	0.00195256	0.0175656	0.368897	0.297508	0.0205574	0.504364	0.00142722	0.00598173	0	0.128595	0.0229122	0.0775068	0.00490784	0.00597971	0.0726436	0.230042	0.85596	0.564203	0.53799	0.720075	0.198204	0.221359	0.0231065	0.00445092	0.861969
15	Niigata	76	Advertising and survery	0	0	0	0	0	0	0	0	0	0	0	0	0	0	0	0	0	0	0	0	0	0	0	0	0	0	0	0	0	0	0	0	0	0	0	0	0	0	0	0	0	0	0	0	0	0
15	Niigata	77	Giids rental and leasing services	1.26428	0	0.014755	0	10.8995	0.537608	0.171137	0.577785	0.170049	2.55726	0.159792	3.44336	17.222	0	0.32042	0	0.0267771	0	0	1.97679	0.295642	0.0541842	0.802614	5.99788	2.35589	0.299544	4.89751	0.0177544	0.380644	0	1.71627	0.334355	0.556252	0.065749	0.30899	1.361	4.64319	15.9844	12.2825	6.88352	5.54038	11.7408	9.15001	1.69562	0.134162	21.8139
15	Niigata	78	Other business services	0.460131	0	0.00703812	0	6.55379	0.306539	0.0626821	0.755581	0.113719	1.47166	0.0689175	2.5703	23.1715	0.000964074	0.235542	0	0.018354	0.00135849	0	1.87389	0.966351	0.0343763	0.108239	4.17845	2.31022	0.414573	3.59798	0.00376911	0.218963	0	0.679202	0.316827	0.0992412	0.149771	0.141539	0.871703	1.55488	4.47243	3.43453	1.20233	2.26494	2.62837	5.81873	0.734795	0.0979522	4.98491
15	Niigata	79	Personal services	13.2634	0	0	0	5.75982	0.203108	0	0.95049	0.0948288	0.874432	0	1.42196	10.672	0	0.0766954	0	0	0	0	1.94535	0.586389	0	0	2.29255	0.79302	0.0781192	1.65897	0	0.025004	0	1.01848	0.0957744	0.353436	0	0.0666547	0.447491	1.2523	2.22267	1.8298	0.848615	1.2725	2.73261	1.73843	0.555372	0	3.58707
15	Niigata	80	Activities not elsewhere classified	0	0	0	0	0	0	0	0	0	0	0	0	0	0	0	0	0	0	0	0	0	0	0	0	0	0	0	0	0	0	0	0	0	0	0	0	0	0	0	0	0	0	0	0	0	0
16	Toyama	1	Agriculture, forestry and fishery	21.9337	0	0	0	641.979	17.8071	1.65692	0.0678214	18.6655	0	0.0699181	0.0391053	0	0	0.101242	0	0.0605516	0	0	0.951096	1.31468	0	0.549241	0	108.648	0	0	0	0.319063	0	0	0	0	0	0.0146646	0	0	0	0	0	0	0	0	0	0	0
16	Toyama	2	Metallic ores	0	0	0	0	0	0	0	0	0	0	0	0	0	0	0	0	0	0	0	0	0	0	0	0	0	0	0	0	0	0	0	0	0	0	0	0	0	0	0	0	0	0	0	0	0	0
16	Toyama	3	Non-metallic ores	0	0	0.0177113	0	0	0	0	0	0	0	0.0466562	0	0	0	0.157636	0	0.00275943	0	0	0.0455101	0.0111985	-0.0343692	0.0184043	0	0.0614389	4.41743	1.5039	0.0430666	0.747065	0	0	0.0288074	0	0.00274249	0.00167072	0.0128189	0.0246631	0	0	0.0850832	0	0	0	0	0	0
16	Toyama	4	Coal mining, crude petroleum and natural gas	0	0	0	0	0	0	0	0	0	0	0	0	0	0	0	0	0	0	0	0	0	0	0	0	0	0	0	0	0	0	0	0	0	0	0	0	0	0	0	0	0	0	0	0	0	0
16	Toyama	5	Food and Tobacco	3.80035	0	0	0	865.28	23.9978	0	0.749078	0.00598521	0	0.0343853	0	0	0	0.00726106	0	0.00521131	0	0	3.86356	0.835381	0	0	0.0103354	0	0	0	0	0.0284067	0	0	0	0	0	0	0	0	0	0	0	0	0	0	0	0	0
16	Toyama	6	Beverage	0.740781	0	0	0	2.508	11.287	0	0	0	0	0	0	0	0	0	0	0.00828975	0	0	0	0.00841051	0	0	0	0	0	0	0	0	0	0	0	0	0	0	0	0	0	0	0	0	0	0	0	0	0
16	Toyama	7	Textile products	2.63408	0	0	0	0	0.0499252	23.7118	353.713	0	5.8464	0.424062	2.70883	4.65833	0	0	0	0	0	0	0.0425048	0	0	0	1.61006	24.5611	0.107532	0	0	0.639198	0	0	0	0	0	0.131073	0.062855	0.351799	0.213209	4.47777	0	0	0	0	0.0237416	0.402446	0.629803
16	Toyama	8	Wearing aparel and other textile products	10.6377	0	0.0329734	0	28.7226	0.676316	2.63615	13.1668	0.732886	2.19997	0.235159	5.39251	4.10782	0	0.170256	0	0.0543083	0	0	3.32682	0.633643	0	1.26775	0.780884	1.67151	0.439322	1.90956	0	0.986776	0	2.12136	0.212609	0.668355	0.0269874	0.312374	0.725327	2.66966	4.03821	2.36697	3.23741	2.24537	7.01258	3.87297	0.547941	0.165205	10.2696
16	Toyama	9	Timber and wooden products	2.82556	0	0	0	13.64	0.593967	0	0.97662	111.25	223.115	26.852	86.6759	1.25957	0	0	0	0	0	0	1.32743	0	0	0	1.43664	0.0527069	2.26167	0.101072	0.279146	1.13338	0	0	0.980288	0	0	2.14417	2.61728	5.68954	1.26829	1.4864	0.496337	6.29759	1.3177	1.47596	0.388378	0.0544087	1.68589
16	Toyama	10	Furniture and fixtures	0.0579286	0	0	0	4.83085	0.167437	0.054781	0.965689	0.0416932	32.2658	0.0598823	1.46529	2.58805	0	0.0758712	0	0.0726043	0	0	2.02423	0.294648	0	0	1.58394	0.451681	0.0515198	0.501459	0.0157381	0.296823	0	0.59706	0.126327	0	0	0.0659384	0.0843204	0.412948	0.53629	1.17994	0.41042	0.451887	0.709361	1.10952	0.127398	0.0736206	6.82246
16	Toyama	11	Pulp, paper, paperboard, building paper	0.0834865	0	0	0	4.64147	0.0965241	0.684236	0.195333	1.38203	10.4722	124.189	381.132	370.168	0	1.16635	0	0	0.147152	0	11.3405	0.106161	0	0	3.42415	0.959311	0.475201	0	0	1.521	0	0.430241	0	0.335931	0	0.190061	0	0.08502	0.103053	0	0.322634	0	7.01815	0.106602	0.0918028	0.0707345	3.04412
16	Toyama	12	Paper products	6.93694	0	0	0	231.771	21.4272	0.369885	2.74543	0.0745188	10.2729	0	8.31072	10.7556	0.0431693	0.572557	0	0.0865111	0	0	142.883	6.53896	0	0	3.90333	1.04807	2.77474	1.62957	0.243783	0.412623	0	0	0	0.138869	0	0.0261895	0	3.40917	1.10762	0.0958599	0.978065	1.19226	1.66762	1.71865	0.56925	0.263166	5.93963
16	Toyama	13	Publishing, printing	0.0646515	0	0.00156184	0	45.692	0.946806	0.0407591	2.02947	0.046532	1.3373	0.00371289	15.205	611.379	0	0.119174	0	0	0	0	15.3792	0.283171	0.00533994	0.0120098	0.133921	0.218149	0.429326	0.0904495	0	0.0736159	0	0.259137	0.101825	0.0192699	0.00447406	0.0708654	0.146388	1.62403	1.40987	1.25702	0.573722	4.35486	0.561075	1.44925	0.0552935	0.206933	8.13548
16	Toyama	14	Chemical fertilizer	31.6282	0	0	0	0	0.169294	0	0	0	0	0	0	0	2.19789	7.54338	0	1.1929	0.129045	0	13.116	3.81703	0	0	0	0	0	0	0	0.083365	0	8.6779	0	0	0	0	0	0	0	0	0	0	0	0	0.0805065	0	0
16	Toyama	15	Basic inorganic chemical products	0	0	0	0	24.5162	0.736437	1.2181	0.0124192	0	0.105685	0.31825	0.859299	0.0925444	0.212465	18.8542	0	2.16881	0.0374235	0	85.5202	12.9324	0	0	4.69717	16.5029	4.12409	0.668351	0	0.0604404	0	6.51039	0.0694527	0.0284779	0.0264478	0.032224	0.710824	0.583799	0.445542	0.452133	0.601714	0.260271	0.660534	1.32844	0.572005	0	1.71867
16	Toyama	16	Basic organic chemical products	0	0	0	0	0	0	0	0	0	0	0	0	0	0	0	0	0	0	0	0	0	0	0	0	0	0	0	0	0	0	0	0	0	0	0	0	0	0	0	0	0	0	0	0	0	0
16	Toyama	17	Organic chemical products	1.25446	0	0	0	11.7787	2.08852	3.7118	0.0195671	0.108346	0.0999073	0.484128	0.20308	1.38518	0	1.75255	0	19.3494	1.25295	0	157.066	33.0626	0	0.0559274	21.9108	28.4172	0.255862	0	0	0.0952267	0	0	0	0	0.0104174	0.190389	0.0243465	0.170334	0.763912	0.015486	0.193915	2.75865	0.376424	0.0854291	0.0459807	0.283427	0.304938
16	Toyama	18	Synthetic resins	0	0	0	0	0	0	0.0730135	0	0	0.322824	0.359157	0.937426	0.201917	0	0	0	0	0	0	64.4771	0	0	0	91.7469	0	0	0	0	0.0923098	0	0	0	0	0	0.0527307	0	0	0	0	0.0895121	0.309747	2.85169	0	0.114614	0.117748	2.56748
16	Toyama	19	Synthetic fibers	0	0	0	0	0	0	19.7712	66.1465	0	1.39273	0.180773	0	0	0	0	0	0	0	0	0	0	0	0.38982	1.88365	0.382746	0	0	0	0	0	0	0	0	0	0	0	0	0	0	0	0	0	0	0	0	0
16	Toyama	20	Final chemical products	1.10222	0	0.0393447	0	7.87965	0.437463	0.653401	0.904525	1.61029	3.63577	1.02886	16.9113	292.162	0	2.95906	0	0.546398	0	0	143.585	9.52866	0.122291	0.962631	5.58185	1.97134	0.117048	0.802666	0	1.28315	0	0.381506	0.143501	0.0441302	0	0.16229	0.383136	2.44597	1.01533	0.944341	0.720519	7.51651	1.25226	1.0608	0.569828	0.0278765	2.98723
16	Toyama	21	Medicaments	84.9817	0	0	0	4.91122	0	0	0.0671728	0	0	0	0	0	0	0	0	0	0	0	23.0602	138.072	0	0	0	0	0	0	0	0	0	0	0	0	0	0	0	0	0	0	0	0	0	0	0	0	0
16	Toyama	22	Petroleum refinery products	6.49322	0	0.00602028	0	16.4204	0.144062	0.532431	0.0890798	0.049823	0.275656	0.186053	0.532305	16.4893	0.0173177	1.36602	0	0.728796	0	0	3.67951	0.132038	1.3585	5.20797	0.189279	0.488619	1.32982	0.631924	0.0601819	0.646344	0	3.95982	0.0905757	0	0.0603602	0.157592	0.443353	1.45221	0.666496	0.23073	0.16051	0.0617143	0.238267	0.212138	0.411046	0	0.302889
16	Toyama	23	Coal products	0	0	0	0	0	0	0	0	0	0	7.37753e-05	0	0	0	0.000290807	0	0.000357795	0	0	4.68331e-05	0	0	0	0	0	0	0	0	0.00100225	0	0.0132405	0.00466906	0	0.000592665	0.000216631	6.92554e-05	0	0	0.000176205	6.12896e-05	0	0	0	0	0	6.93936e-05
16	Toyama	24	Plastic products	4.88851	0	0	0	99.7869	12.1588	0.18129	5.09407	0.768732	12.555	0.913006	42.5617	378.073	0.0513845	1.11195	0	0.0257436	0	0	56.2869	8.93256	0	0	276.778	19.3534	0.745317	0.193968	0	0.327431	0	0	0	0	0.0255855	3.08617	1.3155	2.5519	3.04247	26.5478	3.38674	22.2029	15.4447	10.6744	14.3873	0.939742	87.0264
16	Toyama	25	Rubber products	1.76058	0	0.00380882	0	1.57328	0.030381	0.0276106	0.425244	0.0189127	0.261596	0.0181091	0.354495	1.91846	0	0.0076481	0	0.0164673	0	0	0.224167	0.0946738	0	0.029288	0.217727	7.38322	0	0.510084	0	0.209446	0	0.7448	0.00955066	0.0117483	0	0.00664684	0.509988	0.36572	4.33561	3.90887	0.69956	5.13435	2.1104	1.8566	0.399713	0.0890547	4.75874
16	Toyama	26	Glass and glass products	0.0237398	0	0	0	6.12535	17.1545	0	0	0	7.82268	0	0	0.0776059	0	0.228015	0	0	0	0	22.62	2.77726	0	0	2.41943	0.116908	2.76164	0.0373644	0	0.35141	0	0	0	0	0	0	0.172778	0.290111	0.322341	0.0439594	0	1.64024	0.0942826	3.19801	1.52712	0.080455	0.830987
16	Toyama	27	Cement and cement products	0	0	0	0	0	0	0	0	0	0	0	0	0	0	0	0	0	0	0	0	0	0	0	0	0	0	3.3336	0	0.00202665	0	0	0	0	0	0	0	0	0	0	0	0	0	0	0	0	0
16	Toyama	28	Pottery, china and earthenware	0	0	0	0	0.206484	0	0	0	0	0.196635	0	0	0	0	0.00574886	0	0	0	0	0.00648078	0	0	0	0.00818297	0	0	0.0103626	0.0178874	0	0	0	0	0	0	0	0	0.0134098	0.00812707	0	0	0	0.252766	0.0168139	0.00361992	0	0.230465
16	Toyama	29	Other ceramic, stone and clay products	0.377241	0	0	0	1.43404	0	0	0	0	0.625919	0.108323	0	0.137023	0	3.22072	0	0	0	0	0.536363	0.3198	0	3.92431	0.520954	0.137611	1.55079	110.766	0.250529	13.6024	0	1.62007	1.2797	0	0.0261061	0.286269	0.915183	3.32948	27.3702	4.07483	3.23967	0.280264	3.19064	1.28451	1.24446	0.0355134	2.17025
16	Toyama	30	Pig iron and crude steel	0	0	0	0	0	0	0	0	0	0	0	0	0	0	0.0364393	0	0	0	0	0	0	0	0	0	0	0	0	0	0	0	-48.7125	14.129	-12.1185	0	0	-1.21492	-12.6648	-4.04382	-8.65503	-0.671985	-0.488321	-1.16019	-0.0133219	-0.0688347	-0.0707167	-0.593454
16	Toyama	31	steel products	0.0116449	0	0	0	0	0	0	0	0.0419062	5.51234	0	0	0	0	0	0	0	0	0	0	0	0	0	0.571683	0.683372	0	1.55788	0	0.0265191	0	124.283	1.47288	80.9134	0	0.0486019	9.1277	38.3395	12.4767	13.52	4.14017	2.34235	9.48462	1.46833	1.75427	0.251589	2.13574
16	Toyama	32	Cast and forged steel products	0	0	0	0	0	0	0	0	0	0.832574	0	0	0	0	0	0	0	0	0	0	0	0	0	0	0	0	0	0	0.0476141	0	0	0	0	0	0.063464	9.49527	7.32447	87.8513	44.6004	46.7558	11.5567	17.3822	3.47061	0.597759	0.0708579	0.975817
16	Toyama	33	Other iron or steel products	0	0	0	0	0	0	0	0	0	23.4134	0	0	0	0	0.0229192	0	0	0	0	0.0387558	0	0	0	0.0326234	0	0	0.433786	0	0.149441	0	0	0.372069	0	0	0.0497968	37.6724	72.9349	28.5935	19.2233	3.58415	5.39687	7.34936	0.0837908	1.78953	0.833976	10.461
16	Toyama	34	Non-ferrous metals	0	0	0	0	0	0	0	0	0	0.546659	0.00946065	0	-6.74151	0	10.4524	0	0.275294	0	0	29.6381	0	0	0	0.568732	-0.0150231	0.911622	0	0.0497283	0.86494	0	89.3286	0.259455	-0.196403	16.6784	117.995	-0.985795	18.4911	-1.37823	2.32172	1.41472	-0.428354	6.03361	0.923192	71.9147	0.0310163	2.8565
16	Toyama	35	Non-ferrous metal products	0	0	0	0	20.3529	1.086	0	0	0.270422	49.1864	0	1.52061	19.8567	0	0.820167	0	0	0	0	5.36261	0.358328	0	0	14.4762	9.71393	0.334157	0	0	1.39042	0	0	0	0	1.28706	144.412	80.1211	142.528	184.122	105.925	97.2833	52.5475	208.036	168.034	314.098	5.73003	773.217
16	Toyama	36	Metal products for construction and architecture	0.212458	0	0	0	0	0	0	0	0	2.11507	0	0	0	0	0	0	0	0	0	0	0	0	0	0	0	0	0	0	0	0	0	0	0	0	0	35.5641	5.40903	1.31126	0	1.09473	0	0	0	0	0	0.464805
16	Toyama	37	Other metal products	0.367129	0	0.00591268	0	14.7314	8.70932	0	2.12356	1.82029	15.8241	0.0913637	0.93552	1.83726	0	0.605505	0	0.119295	0	0	12.3269	1.23626	0.040431	0.204595	0.946378	6.33896	0.416001	0.83464	0	2.14436	0	0	0.415132	0.0182376	0	0.30955	24.3048	55.6931	29.5905	21.5905	10.9473	18.047	9.45932	6.93619	1.36809	0.49538	13.5153
16	Toyama	38	General industrial machinery	0	0	0	0	0	0	0	0	0	0.157226	0	0	0	0	0	0	0	0	0	0	0	0	0	3.06925	0	0.0102153	0.0225976	0	0.188006	0	0	0.109585	0.154058	0	0.0217904	0.0835952	0.628717	276.277	36.7553	7.82339	10.112	3.01261	2.85077	0.0473633	0.182469	0.554923
16	Toyama	39	Special industrial machinery	0	0	0	0	0	0	0	0	0	0	0	0	0	0	0	0	0	0	0	0	0	0	0	0	0	0	0	0	0	0	0	0	0	0	0	0	0	1.82327	749.543	0	0.102879	0	0.0589394	0.456813	0	0
16	Toyama	40	Other general machines	0	0	0	0	0	0	0	0	0	5.66095	0	0	0	0	0	0	0	0	0	0.345512	0	0	0	0.959775	0	0.0499489	0	0	0.279779	0	0	0.382734	0	0	0.106546	0.715307	2.14477	135.27	98.6666	273.018	10.8745	12.2676	8.51585	0.771959	0.594798	7.42331
16	Toyama	41	Machinery for office and service industry	0	0	0	0	0	0	0	0	0	0	0	0	0	0	0	0	0	0	0	0	0	0	0	0	0	0	0	0	0	0	0	0	0	0	0	0	0	0	0	0	14.1769	0	0	0	0	0
16	Toyama	42	Industrial electric equipment	0.163318	0	0	0	0	0	0	0	0	0.0286918	0	0	0	0	0	0	0	0	0	0	0	0	0	0	0	0	0	0	0	0	0	0	0	0	0	0	0	10.7794	13.2797	0.111379	9.721	47.0184	15.1435	2.32935	0.341862	10.2776
16	Toyama	43	Applied electric equipment and electric mesuring instruments	0	0	0	0	0	0	0	0	0	0	0	0	0	0	0	0	0	0	0	0	0	0	0	0	0	0	0	0	0	0	0	0	0	0	0	0	0	0.541556	2.26951	0.150364	0.399209	3.0399	20.8613	0	0	0.519541
16	Toyama	44	Other electric equipment	0.0473861	0	0.000858559	0	0	0	0	0	0	0.0353804	0	0	0	0	0	0	0	0	0	0.0233217	0	0	0	0	0	0	0	0	0	0	0	0	0	0	0	0	0.0723849	0.229094	0.658092	0.137343	0.576475	1.46896	0.874822	5.3561	0.0501853	5.75074
16	Toyama	45	Household electric and electric applications	0	0	0	0	0	0	0	0	0	0	0	0	0	0	0	0	0	0	0	0	0	0	0	0	0	0	0	0	0	0	0	0	0	0	0	0	0	0	0	0	0	0	0	0	0.255039	0
16	Toyama	46	Communication equipment	0	0	0	0	0	0	0	0	0	0	0	0	0.00599265	0	0	0	0	0	0	0	0.00174829	0	0	0	0	0	0	0	0	0	0	0	0	0	0	0	0	0.0339421	0.00636468	0	0	0.000910051	0.073733	0.000755915	0	1.27534
16	Toyama	47	Electric computing equipment and accessory equipment	0	0	0	0	0	0	0	0	0	0	0	0	0	0	0	0	0	0	0	0	0	0	0	0	0	0	0	0	0	0	0	0	0	0	0	0	0	0	0.0174364	0	0	0	0	0	0	0.00337588
16	Toyama	48	Semiconductor devices and integrated circuits	0	0	0	0	0	0	0	0	0	0	0	0	0	0	0	0	0	0	0	0	0	0	0	0	0	0	0	0	0	0	0	0	0	0	0	0	0.845889	3.07592	19.9952	5.4264	331.317	205.746	1360.35	10.2428	12.3158	1767.02
16	Toyama	49	Other electrical equipment	0	0	0	0	0	0	0	0	0	0	0	0.0847987	4.10967	0	0	0	0	0	0	0	0	0	0	0	0	0	0	0	0	0	0	0	0	0	0.0635995	0	0.1707	12.2075	25.6457	0.701755	104.046	73.0336	624.626	1.93534	3.51496	816.211
16	Toyama	50	Passenger motor cars	0	0	0	0	0	0	0	0	0	0	0	0	0	0	0	0	0	0	0	0	0	0	0	0	0	0	0	0	0	0	0	0	0	0	0	0	0	0	0	0	0	0	0	0	0	0
16	Toyama	51	Other cars	0	0	0	0	0	0	0	0	0	0	0	0	0	0	0	0	0	0	0	0	0	0	0	0	0	0	0	0	0	0	0	0	0	0	0	0	0	0	0	0	0	0	0	0	0	0
16	Toyama	52	Motor vheicle parts and accessories	0	0	0	0	0	0	0	0	0	0	0	0	0	0	0	0	0	0	0	0	0	0	0	0	0	0	0	0	0	0	0	0	0	0	0	0	0	0	0.049051	0	0	0	0	0	0	0
16	Toyama	53	Other transportation equipment	0.31619	0	0	0	0	0	0	0	0	0	0	0	0	0	0	0	0	0	0	0	0	0	0	0	0	0	0	0	0	0	0	0	0	0	0	0	0	0	0	0	0	0	0	0	0	0
16	Toyama	54	Precision instruments	0.217944	0	0	0	0	0	0.00183202	0.00169975	0.0020915	0	0.00300393	0.00588036	0.00633301	0	0	0	0	0	0	0.00858113	0.00369517	0	0	0.0325049	0	0	0	0	0	0	0	0	0	0	0.00220516	0.00422984	0.00591861	0.735333	2.02323	0.01123	0.631478	0.330838	0.551012	0.0015977	0.00246207	0.663291
16	Toyama	55	Miscellaneous manufacturing products	2.47198	0	0.0298588	0	5.41632	0.846821	0.0865804	57.2479	0.757796	11.7577	0.0946429	0.833708	1.79577	0	0	0	0.143437	0	0	1.17156	0	0	0.382667	0.56895	0.33815	1.20511	0.432298	0.124369	3.02324	0	0	1.24786	0.0613995	0	0.55581	1.06613	0.745894	9.54958	3.00922	0.471753	0	0.484813	2.04583	0.125844	0.0387853	8.24564
16	Toyama	56	Reuse and recycling	0	0	0	0	0	0.876989	0	0	0	0	0.0358926	0	0	0	0.0326495	0	0	0	0	0	0	0	0	0.956028	0.00438431	0.053209	0.0672598	0.00290251	0.00304122	0	0.178935	0.792133	0.0716471	0.509029	1.18365	0	0	0	0	0	0	0	0	0	0	0
16	Toyama	57	Building construction and repair of construction	0	0	0	0	0	0	0	0	0	0	0	0	0	0	0	0	0	0	0	0	0	0	0	0	0	0	0	0	0	0	0	0	0	0	0	0	0	0	0	0	0	0	0	0	0	0
16	Toyama	58	Public construction	0	0	0	0	0	0	0	0	0	0	0	0	0	0	0	0	0	0	0	0	0	0	0	0	0	0	0	0	0	0	0	0	0	0	0	0	0	0	0	0	0	0	0	0	0	0
16	Toyama	59	Other civil enginnering and construction	0	0	0	0	0	0	0	0	0	0	0	0	0	0	0	0	0	0	0	0	0	0	0	0	0	0	0	0	0	0	0	0	0	0	0	0	0	0	0	0	0	0	0	0	0	0
16	Toyama	60	Electricity	6.42298	0	0.357117	0	227.365	15.7874	2.82835	9.49277	4.65813	13.3009	6.31017	16.3708	157.316	0.0613294	7.1923	0	2.67316	0.0216051	0	48.3102	4.14608	4.51947	2.86901	48.7808	30.0005	3.39255	15.3953	0.21313	5.94577	0	79.6556	15.3968	8.71354	7.09993	3.9439	13.0604	48.5579	39.9141	41.1053	19.0426	10.9825	18.6611	8.73352	4.55577	3.1156	32.7519
16	Toyama	61	Gas supply and heat supply	0	0	0	0	0	0	0	0	0	0	0	0	0	0	0	0	0	0	0	0	0	0	0	0	0	0	0	0	0	0	0	0	0	0	0	0	0	0	0	0	0	0	0	0	0	0
16	Toyama	62	Water supply and waste management services	5.6829e-05	0	9.15242e-07	0	0.00788208	0.000893084	0.000123406	5.78634e-05	3.63572e-05	0.000157151	0.000102261	0.000315179	0.00140363	0	0.000101079	0	6.72692e-05	1.85493e-06	0	0.00180453	0.000537964	2.34692e-05	2.11133e-05	0.000397624	0.000205574	4.71725e-05	0.0012224	3.43096e-06	0.000194126	0	0.000775547	2.29498e-05	3.66997e-05	4.85035e-05	3.99302e-05	0.000208332	0.000385819	0.00124448	0.00103477	0.000317223	0.000394053	0.000338544	0.000232473	6.36471e-05	4.99321e-05	0.000509589
16	Toyama	63	Commerce	19.5222	0	0.0500069	0	491.113	22.8207	1.96852	31.9129	5.43272	32.7289	5.38919	64.821	253.732	0.0348722	3.39581	0	1.45882	0.0675661	0	77.3589	12.4787	0.331586	3.21606	39.5092	21.9895	1.99597	35.169	0.106038	3.99187	0	39.8151	3.45021	27.2688	0.837797	4.08308	17.8249	35.2617	64.1543	77.6293	20.9551	48.8935	33.853	70.7066	15.1249	1.90737	119.722
16	Toyama	64	Financial and insurance	0.175803	0	0.00103306	0	0.624988	0.0647975	0.0289338	0.339949	0.0197414	0.227477	0.0242235	0.400547	1.00773	0.000135075	0.0175379	0	0.00345129	9.51681e-05	0	0.14658	0.034741	0.00850897	0.00216646	0.124147	0.119652	0.0266607	0.523822	0.00164292	0.0340599	0	0.147473	0.0168376	0.0653222	0.0313417	0.00983348	0.0932107	0.109201	0.329907	0.239553	0.250946	0.0948279	0.144386	0.112033	0.0156742	0.00539807	0.247351
16	Toyama	65	Real estate agencies and rental services	0.000195232	0	4.24474e-07	0	0.000923982	8.2388e-05	1.66162e-05	0.000348298	7.72834e-06	0.000328464	3.93542e-05	0.000636058	0.00108284	0	2.9832e-05	0	4.89385e-06	0	0	0.000194094	0.000118543	2.90256e-06	2.6112e-05	0.000839556	0.00021552	1.45852e-05	0.000894178	1.59122e-06	2.7232e-05	0	0.000228891	5.53474e-05	4.05878e-05	1.39834e-05	1.11114e-05	0.000103725	0.000315127	0.000527765	0.000542271	0.000325682	0.000110958	0.000438726	0.000349626	0.000132028	1.24059e-05	0.000399355
16	Toyama	66	House rent	0	0	0	0	0	0	0	0	0	0	0	0	0	0	0	0	0	0	0	0	0	0	0	0	0	0	0	0	0	0	0	0	0	0	0	0	0	0	0	0	0	0	0	0	0	0
16	Toyama	67	Transport	32.4598	0	0.874581	0	103.856	10.447	0.880921	6.41965	4.38846	9.27362	1.16868	14.6176	107.542	0	1.75246	0	0.366181	0	0	25.0407	6.41267	0.931684	0.382269	12.4302	4.40668	1.50632	102.457	0.0460146	17.2508	0	29.48	1.03418	5.05452	0.73314	1.72868	11.8706	18.8177	25.4851	19.9936	11.6834	12.3534	9.50122	21.8914	2.42114	0.365925	46.7311
16	Toyama	68	Communication	0.154648	0	0.00102367	0	0.177087	0.0108871	0.00502327	0.10677	0.00104268	0.141697	0.00580304	0.159037	0.981103	0	0.00822213	0	0.00113482	0	0	0.170406	0.44258	0.0137306	0.0145321	0.1688	0.172707	0.01224	0.0290715	0	0.00989741	0	0.0625256	0.0185605	0.00437193	0.0187224	0.0178643	0.131795	0.139417	0.48774	0.22366	0.146494	0.13884	0.192982	0.179663	0.023696	0.00368226	0.284716
16	Toyama	69	Broadcasting	0	0	0	0	0	0	0	0	0	0	0	0	0	0	0	0	0	0	0	0	0	0	0	0	0	0	0	0	0	0	0	0	0	0	0	0	0	0	0	0	0	0	0	0	0	0
16	Toyama	70	Information services	0.00425985	0	2.28686e-05	0	0.0167332	0.00218893	0.000152515	0.000972066	0.000295241	0.00785327	0.000282695	0.00764106	0.0279312	0	0.0002296	0	0.000112054	0	0	0.00591172	0.00859336	7.81878e-06	0.000228603	0.00962142	0.00355674	0.000707201	0.00415521	3.42909e-05	0.000491039	0	0.0036317	0.000642245	0.00166469	0.000393057	0.000590644	0.00212811	0.00728372	0.015554	0.0190773	0.00678813	0.00811118	0.0167718	0.0339521	0.00609522	8.91158e-05	0.0360813
16	Toyama	71	﻿Internet based services	0.000212475	0	0	0	0.000984385	0.000184242	2.51162e-05	0.000396147	4.77892e-05	0.00101795	2.74551e-05	0.000833045	0.00366103	0	3.47857e-05	0	0	0	0	0.000313716	0.00241476	9.87159e-06	2.22017e-05	0.00178251	0.000261585	7.55872e-05	0.000543426	0	5.29234e-05	0	0.000239525	0.000115838	1.78115e-05	1.65418e-05	0.00011085	0.000676542	0.000879033	0.00175395	0.00104508	0.000513194	0.000636348	0.00145914	0.000856304	0.000153326	1.12513e-05	0.00392209
16	Toyama	72	Image information production and distribution industry	0.142538	0	0.00908345	0	1.15258	0.025572	0.0340856	0.521805	0.0194566	0.406125	0.017783	0.740983	3.30455	0	0.0514999	0	0.00770037	0	0	0.701518	0.153126	0.00182685	0.024652	0.345146	0.492161	0.0533302	1.05209	0.00133534	0.0755542	0	0.259628	0.0241167	0.0428508	0.00918372	0.0149192	0.182437	0.690742	0.47323	0.436865	0.205773	0.454621	0.69297	1.14066	0.162141	0.0208218	1.39789
16	Toyama	73	Public administration	0	0	0	0	0	0	0	0	0	0	0	0	0	0	0	0	0	0	0	0	0	0	0	0	0	0	0	0	0	0	0	0	0	0	0	0	0	0	0	0	0	0	0	0	0	0
16	Toyama	74	Education and Research	0.0889139	0	0.0029741	0	6.08256	0.56709	0.0554392	0.382344	0.0189874	1.42209	0.0232307	1.0835	0.409906	0.00977735	0.81731	0	0.244922	0.0103331	0	19.2198	14.8007	0.00726321	0.0865771	10.276	5.5294	1.21205	2.39748	0.0270762	0.329872	0	2.06447	0.124649	0.00393154	0.481969	0.476754	0.941513	0.854725	8.58242	15.7931	1.28507	13.235	15.7553	26.9851	5.3586	0.371698	38.9113
16	Toyama	75	Medical service, health and social security and nursing care	0.0607974	0	0.00208714	0	0.821067	0.155382	0.006052	0.25642	0.00921221	0.124236	0.0165389	0.284907	0.345193	0	0.0307339	0	0.00401052	0	0	0.573247	0.408929	0.00237866	0.0213988	0.449399	0.362431	0.0250435	0.614428	0.00173868	0.00728709	0	0.156657	0.0279122	0.0944207	0.00597886	0.00728463	0.0884963	0.280243	1.04275	0.687327	0.655393	0.877214	0.241457	0.269665	0.0281489	0.00542222	1.05007
16	Toyama	76	Advertising and survery	0	0	0	0	0	0	0	0	0	0	0	0	0	0	0	0	0	0	0	0	0	0	0	0	0	0	0	0	0	0	0	0	0	0	0	0	0	0	0	0	0	0	0	0	0	0
16	Toyama	77	Giids rental and leasing services	0.374964	0	0.00437608	0	3.23262	0.159446	0.0507564	0.171362	0.0504338	0.758441	0.0473917	1.02124	5.10775	0	0.0950314	0	0.00794163	0	0	0.586282	0.0876826	0.0160701	0.238042	1.77887	0.698719	0.0888398	1.45252	0.00526566	0.112893	0	0.509017	0.099164	0.164975	0.0195001	0.0916412	0.403649	1.37709	4.7407	3.64279	2.04154	1.64318	3.48212	2.71374	0.502893	0.0397903	6.46964
16	Toyama	78	Other business services	0.00057705	0	8.82649e-06	0	0.0082191	0.00038443	7.86095e-05	0.000947573	0.000142615	0.0018456	8.64293e-05	0.00322341	0.0290594	1.20904e-06	0.000295393	0	2.30177e-05	1.70369e-06	0	0.00235004	0.0012119	4.31112e-05	0.000135743	0.00524019	0.00289724	0.000519915	0.00451222	4.72683e-06	0.000274601	0	0.000851787	0.000397332	0.000124458	0.000187827	0.000177504	0.0010932	0.00194997	0.00560886	0.00430724	0.00150784	0.00284046	0.00329623	0.00729726	0.000921505	0.000122842	0.00625157
16	Toyama	79	Personal services	3.62302	0	0	0	1.57335	0.055481	0	0.259636	0.0259035	0.23886	0	0.388422	2.91517	0	0.0209501	0	0	0	0	0.531393	0.160178	0	0	0.626233	0.216622	0.0213391	0.453164	0	0.00683009	0	0.27821	0.0261618	0.0965447	0	0.0182074	0.122237	0.34208	0.607147	0.499828	0.231808	0.347597	0.74644	0.474871	0.151706	0	0.979845
16	Toyama	80	Activities not elsewhere classified	0	0	0	0	0	0	0	0	0	0	0	0	0	0	0	0	0	0	0	0	0	0	0	0	0	0	0	0	0	0	0	0	0	0	0	0	0	0	0	0	0	0	0	0	0	0
17	Ishikawa	1	Agriculture, forestry and fishery	20.867	0	0	0	610.759	16.9412	1.57634	0.0645232	17.7578	0	0.066518	0.0372036	0	0	0.0963184	0	0.0576069	0	0	0.904844	1.25075	0	0.522532	0	103.364	0	0	0	0.303547	0	0	0	0	0	0.0139515	0	0	0	0	0	0	0	0	0	0	0
17	Ishikawa	2	Metallic ores	0	0	0	0	0	0	0	0	0	0	0	0	0	0	0	0	0	0	0	0	0	0	0	0	0	0	0	0	0	0	0	0	0	0	0	0	0	0	0	0	0	0	0	0	0	0
17	Ishikawa	3	Non-metallic ores	0	0	0.0735746	0	0	0	0	0	0	0	0.193814	0	0	0	0.654837	0	0.0114629	0	0	0.189053	0.0465197	-0.142773	0.0764531	0	0.255223	18.3505	6.24736	0.178903	3.10338	0	0	0.119669	0	0.0113926	0.00694035	0.0532508	0.102453	0	0	0.353444	0	0	0	0	0	0
17	Ishikawa	4	Coal mining, crude petroleum and natural gas	0	0	0	0	0	0	0	0	0	0	0	0	0	0	0	0	0	0	0	0	0	0	0	0	0	0	0	0	0	0	0	0	0	0	0	0	0	0	0	0	0	0	0	0	0	0
17	Ishikawa	5	Food and Tobacco	9.09522	0	0	0	2070.84	57.433	0	1.79274	0.0143242	0	0.082293	0	0	0	0.0173776	0	0.012472	0	0	9.24651	1.99928	0	0	0.0247354	0	0	0	0	0.0679846	0	0	0	0	0	0	0	0	0	0	0	0	0	0	0	0	0
17	Ishikawa	6	Beverage	0.269685	0	0	0	0.913053	4.10909	0	0	0	0	0	0	0	0	0	0	0.00301793	0	0	0	0.00306189	0	0	0	0	0	0	0	0	0	0	0	0	0	0	0	0	0	0	0	0	0	0	0	0	0
17	Ishikawa	7	Textile products	6.87648	0	0	0	0	0.130334	61.9014	923.396	0	15.2625	1.10705	7.0716	12.1609	0	0	0	0	0	0	0.110962	0	0	0	4.2032	64.1187	0.280722	0	0	1.66868	0	0	0	0	0	0.342177	0.164088	0.918399	0.556598	11.6896	0	0	0	0	0.0619792	1.05062	1.64415
17	Ishikawa	8	Wearing aparel and other textile products	6.79267	0	0.0210551	0	18.3407	0.43186	1.6833	8.40765	0.467983	1.40478	0.15016	3.44337	2.62303	0	0.108716	0	0.0346784	0	0	2.12433	0.404611	0	0.809517	0.498631	1.06734	0.280528	1.21935	0	0.630103	0	1.35459	0.135761	0.426776	0.0172328	0.199465	0.463156	1.70471	2.57859	1.51142	2.06724	1.43378	4.47786	2.47307	0.349886	0.105491	6.55765
17	Ishikawa	9	Timber and wooden products	0.685757	0	0	0	3.31039	0.144154	0	0.237023	27.0002	54.1493	6.51692	21.036	0.305693	0	0	0	0	0	0	0.322163	0	0	0	0.348668	0.0127918	0.548902	0.02453	0.067748	0.275069	0	0	0.237913	0	0	0.520385	0.635208	1.38084	0.30781	0.360746	0.12046	1.52841	0.319803	0.358212	0.0942584	0.0132048	0.409162
17	Ishikawa	10	Furniture and fixtures	0.137837	0	0	0	11.4947	0.398406	0.130348	2.29779	0.099206	76.7742	0.142486	3.48655	6.15807	0	0.18053	0	0.172757	0	0	4.81651	0.701094	0	0	3.76886	1.07474	0.122588	1.19319	0.0374476	0.70627	0	1.42066	0.300586	0	0	0.156896	0.200634	0.982582	1.27606	2.80758	0.976565	1.07523	1.68787	2.64002	0.303134	0.175175	16.2336
17	Ishikawa	11	Pulp, paper, paperboard, building paper	0.00569158	0	0	0	0.316426	0.00658041	0.0466469	0.0133166	0.0942179	0.713927	8.46642	25.9832	25.2358	0	0.0795145	0	0	0.0100319	0	0.773128	0.00723742	0	0	0.233437	0.0653998	0.0323963	0	0	0.103692	0	0.0293311	0	0.0229017	0	0.0129571	0	0.00579613	0.00702553	0	0.0219952	0	0.478453	0.00726747	0.00625854	0.00482224	0.207529
17	Ishikawa	12	Paper products	0.519972	0	0	0	17.3729	1.60612	0.0277255	0.205789	0.00558571	0.770026	0	0.622947	0.806206	0.00323584	0.0429171	0	0.00648461	0	0	10.7101	0.490141	0	0	0.292582	0.0785599	0.207986	0.122148	0.0182733	0.030929	0	0	0	0.0104092	0	0.00196308	0	0.255541	0.0830239	0.00718537	0.0733128	0.0893686	0.125	0.128825	0.0426693	0.0197261	0.445217
17	Ishikawa	13	Publishing, printing	0.15135	0	0.00365627	0	106.965	2.21648	0.0954173	4.751	0.108932	3.13062	0.00869189	35.5951	1431.24	0	0.278988	0	0	0	0	36.0028	0.662904	0.0125008	0.0281149	0.313511	0.510688	1.00505	0.211743	0	0.172335	0	0.606642	0.238372	0.0451109	0.0104738	0.165896	0.342694	3.80186	3.30051	2.94269	1.34308	10.1947	1.31348	3.3927	0.129442	0.484432	19.0452
17	Ishikawa	14	Chemical fertilizer	0	0	0	0	0	0	0	0	0	0	0	0	0	0	0	0	0	0	0	0	0	0	0	0	0	0	0	0	0	0	0	0	0	0	0	0	0	0	0	0	0	0	0	0	0	0
17	Ishikawa	15	Basic inorganic chemical products	0	0	0	0	0.243385	0.00731098	0.0120927	0.000123292	0	0.00104919	0.00315943	0.00853069	0.000918734	0.00210925	0.187175	0	0.0215309	0.000371522	0	0.849002	0.128387	0	0	0.0466312	0.163832	0.0409419	0.00663505	0	0.000600022	0	0.0646319	0.000689491	0.000282714	0.000262561	0.000319903	0.0070567	0.00579566	0.00442312	0.00448855	0.00597352	0.00258384	0.00655745	0.013188	0.00567858	0	0.0170621
17	Ishikawa	16	Basic organic chemical products	0	0	0	0	0	0	0	0	0	0	0	0	0	0	0	0	0	0	0	0	0	0	0	0	0	0	0	0	0	0	0	0	0	0	0	0	0	0	0	0	0	0	0	0	0	0
17	Ishikawa	17	Organic chemical products	0.343495	0	0	0	3.22523	0.571877	1.01636	0.00535783	0.0296671	0.0273565	0.132563	0.0556071	0.379287	0	0.479881	0	5.29823	0.343083	0	43.0077	9.05317	0	0.015314	5.9996	7.78117	0.0700599	0	0	0.0260749	0	0	0	0	0.00285249	0.0521321	0.00666652	0.0466406	0.209173	0.00424036	0.0530976	0.755371	0.103072	0.0233921	0.0125904	0.0776077	0.0834978
17	Ishikawa	18	Synthetic resins	0	0	0	0	0	0	0.0579638	0	0	0.256282	0.285127	0.744202	0.160297	0	0	0	0	0	0	51.1869	0	0	0	72.8358	0	0	0	0	0.0732827	0	0	0	0	0	0.0418617	0	0	0	0	0.0710616	0.245901	2.2639	0	0.0909899	0.0934776	2.03826
17	Ishikawa	19	Synthetic fibers	0	0	0	0	0	0	23.9679	80.1869	0	1.68835	0.219144	0	0	0	0	0	0	0	0	0	0	0	0.472564	2.28348	0.463989	0	0	0	0	0	0	0	0	0	0	0	0	0	0	0	0	0	0	0	0	0
17	Ishikawa	20	Final chemical products	0.102176	0	0.00364724	0	0.730443	0.0405527	0.0605702	0.0838494	0.149274	0.337035	0.0953748	1.56767	27.0833	0	0.274304	0	0.050651	0	0	13.3103	0.883306	0.0113363	0.0892358	0.517437	0.182743	0.0108504	0.0744071	0	0.118948	0	0.0353656	0.0133026	0.00409087	0	0.0150442	0.0355167	0.226741	0.0941213	0.0875403	0.066792	0.696779	0.116084	0.0983362	0.052823	0.00258415	0.276915
17	Ishikawa	21	Medicaments	12.3298	0	0	0	0.712558	0	0	0.00974594	0	0	0	0	0	0	0	0	0	0	0	3.34575	20.0325	0	0	0	0	0	0	0	0	0	0	0	0	0	0	0	0	0	0	0	0	0	0	0	0	0
17	Ishikawa	22	Petroleum refinery products	0	0	0	0	0	0	0	0	0	0	0	0	0	0	0	0	0	0	0	0	0	0	0	0	0	0	0	0	0	0	0	0	0	0	0	0	0	0	0	0	0	0	0	0	0	0
17	Ishikawa	23	Coal products	0	0	0	0	0	0	0	0	0	0	0	0	0	0	0	0	0	0	0	0	0	0	0	0	0	0	0	0	0	0	0	0	0	0	0	0	0	0	0	0	0	0	0	0	0	0
17	Ishikawa	24	Plastic products	1.52353	0	0	0	31.0992	3.78935	0.0565001	1.5876	0.23958	3.91285	0.284544	13.2646	117.829	0.0160143	0.346545	0	0.00802315	0	0	17.5422	2.78389	0	0	86.2595	6.0316	0.232283	0.0604514	0	0.102046	0	0	0	0	0.0079739	0.961823	0.409985	0.795317	0.948205	8.27379	1.0555	6.91968	4.81345	3.32674	4.48388	0.292876	27.1223
17	Ishikawa	25	Rubber products	0.504275	0	0.00109094	0	0.450626	0.00870187	0.00790838	0.121801	0.00541708	0.0749277	0.00518689	0.101536	0.549494	0	0.00219061	0	0.00471664	0	0	0.0642072	0.0271169	0	0.00838881	0.0623625	2.11474	0	0.146101	0	0.0599906	0	0.21333	0.00273555	0.003365	0	0.00190382	0.146073	0.104752	1.24183	1.1196	0.200372	1.47061	0.604471	0.531777	0.114488	0.0255075	1.36302
17	Ishikawa	26	Glass and glass products	0.00415638	0	0	0	1.07243	3.00342	0	0	0	1.3696	0	0	0.0135873	0	0.039921	0	0	0	0	3.96032	0.486244	0	0	0.423596	0.0204683	0.48351	0.00654178	0	0.061525	0	0	0	0	0	0	0.03025	0.0507928	0.0564357	0.00769643	0	0.287175	0.0165071	0.55991	0.267369	0.0140861	0.14549
17	Ishikawa	27	Cement and cement products	0	0	0	0	0	0	0	0	0	0	0	0	0	0	0	0	0	0	0	0	0	0	0	0	0	0	2.08303	0	0.00126637	0	0	0	0	0	0	0	0	0	0	0	0	0	0	0	0	0
17	Ishikawa	28	Pottery, china and earthenware	0	0	0	0	0.668821	0	0	0	0	0.636918	0	0	0	0	0.0186211	0	0	0	0	0.0209919	0	0	0	0.0265054	0	0	0.0335654	0.057939	0	0	0	0	0	0	0	0	0.0434358	0.0263244	0	0	0	0.818735	0.0544618	0.0117253	0	0.746499
17	Ishikawa	29	Other ceramic, stone and clay products	0.128074	0	0	0	0.486861	0	0	0	0	0.212501	0.0367761	0	0.0465196	0	1.09344	0	0	0	0	0.182097	0.108573	0	1.33231	0.176865	0.0467191	0.526495	37.6054	0.0850552	4.61803	0	0.550017	0.434461	0	0.00886308	0.0971889	0.310707	1.13037	9.29225	1.38342	1.09988	0.0951502	1.08323	0.436094	0.422496	0.0120569	0.736806
17	Ishikawa	30	Pig iron and crude steel	0	0	0	0	0	0	0	0	0	0	0	0	0	0	0	0	0	0	0	0	0	0	0	0	0	0	0	0	0	0	0	0	0	0	0	0	0	0	0	0	0	0	0	0	0	0
17	Ishikawa	31	steel products	0.00134942	0	0	0	0	0	0	0	0.00485611	0.638773	0	0	0	0	0	0	0	0	0	0	0	0	0	0.0662469	0.0791894	0	0.180528	0	0.00307304	0	14.402	0.170678	9.37628	0	0.00563201	1.05772	4.4428	1.44581	1.56671	0.479765	0.271433	1.09908	0.17015	0.203285	0.0291542	0.247491
17	Ishikawa	32	Cast and forged steel products	0	0	0	0	0	0	0	0	0	0.151177	0	0	0	0	0	0	0	0	0	0	0	0	0	0	0	0	0	0	0.00864564	0	0	0	0	0	0.0115236	1.72413	1.32996	15.9518	8.09843	8.4898	2.09843	3.15622	0.630185	0.108539	0.0128662	0.177186
17	Ishikawa	33	Other iron or steel products	0	0	0	0	0	0	0	0	0	6.83184	0	0	0	0	0.00668764	0	0	0	0	0.0113086	0	0	0	0.00951924	0	0	0.126575	0	0.0436056	0	0	0.108567	0	0	0.0145303	10.9925	21.2818	8.34334	5.60919	1.04582	1.57476	2.14448	0.0244495	0.522169	0.243347	3.05243
17	Ishikawa	34	Non-ferrous metals	0	0	0	0	0	0	0	0	0	0	0	0	0	0	0	0	0	0	0	0	0	0	0	0	0	0	0	0	0	0	0	0	0	0	0	0	0	0	0	0	0	0	0	0	0	0
17	Ishikawa	35	Non-ferrous metal products	0	0	0	0	1.8508	0.0987554	0	0	0.0245908	4.47277	0	0.138277	1.80567	0	0.074582	0	0	0	0	0.487649	0.0325846	0	0	1.31639	0.883337	0.0303866	0	0	0.126438	0	0	0	0	0.117039	13.1321	7.28582	12.9608	16.7431	9.63234	8.84647	4.77841	18.9177	15.2802	28.5625	0.521061	70.3126
17	Ishikawa	36	Metal products for construction and architecture	0.00958166	0	0	0	0	0	0	0	0	0.0953873	0	0	0	0	0	0	0	0	0	0	0	0	0	0	0	0	0	0	0	0	0	0	0	0	0	1.6039	0.243942	0.0591366	0	0.0493712	0	0	0	0	0	0.0209622
17	Ishikawa	37	Other metal products	0.461383	0	0.00743066	0	18.5134	10.9453	0	2.66875	2.28761	19.8867	0.11482	1.1757	2.30895	0	0.760958	0	0.149922	0	0	15.4916	1.55365	0.050811	0.257122	1.18934	7.96638	0.522802	1.04892	0	2.69488	0	0	0.521709	0.0229198	0	0.389021	30.5447	69.9914	37.1874	27.1335	13.7579	22.6803	11.8878	8.71694	1.71933	0.62256	16.9851
17	Ishikawa	38	General industrial machinery	0	0	0	0	0	0	0	0	0	0.239667	0	0	0	0	0	0	0	0	0	0	0	0	0	4.67861	0	0.0155718	0.0344466	0	0.286587	0	0	0.167047	0.234839	0	0.0332163	0.127428	0.958385	421.144	56.028	11.9256	15.4143	4.59228	4.34557	0.0721984	0.278146	0.845898
17	Ishikawa	39	Special industrial machinery	0	0	0	0	0	0	0	0	0	0	0	0	0	0	0	0	0	0	0	0	0	0	0	0	0	0	0	0	0	0	0	0	0	0	0	0	0	3.78839	1557.4	0	0.213761	0	0.122464	0.949165	0	0
17	Ishikawa	40	Other general machines	0	0	0	0	0	0	0	0	0	1.09125	0	0	0	0	0	0	0	0	0	0.0666038	0	0	0	0.185014	0	0.00962857	0	0	0.0539325	0	0	0.0737791	0	0	0.0205388	0.137889	0.413444	26.0759	19.0198	52.6292	2.09625	2.36481	1.64159	0.148809	0.114658	1.43098
17	Ishikawa	41	Machinery for office and service industry	0	0	0	0	0	0	0	0	0	0	0	0	0	0	0	0	0	0	0	0	0	0	0	0	0	0	0	0	0	0	0	0	0	0	0	0	0	0	0	0	16.7436	0	0	0	0	0
17	Ishikawa	42	Industrial electric equipment	0.258569	0	0	0	0	0	0	0	0	0.0454254	0	0	0	0	0	0	0	0	0	0	0	0	0	0	0	0	0	0	0	0	0	0	0	0	0	0	0	17.0662	21.0248	0.176337	15.3905	74.4406	23.9756	3.68787	0.541243	16.2717
17	Ishikawa	43	Applied electric equipment and electric mesuring instruments	0	0	0	0	0	0	0	0	0	0	0	0	0	0	0	0	0	0	0	0	0	0	0	0	0	0	0	0	0	0	0	0	0	0	0	0	0	0.891307	3.73522	0.247472	0.657029	5.00315	34.334	0	0	0.855075
17	Ishikawa	44	Other electric equipment	0.0629565	0	0.00114067	0	0	0	0	0	0	0.0470058	0	0	0	0	0	0	0	0	0	0.0309849	0	0	0	0	0	0	0	0	0	0	0	0	0	0	0	0	0.0961694	0.304371	0.874331	0.182472	0.765896	1.95163	1.16227	7.11604	0.0666755	7.64034
17	Ishikawa	45	Household electric and electric applications	0	0	0	0	0	0	0	0	0	0	0	0	0	0	0	0	0	0	0	0	0	0	0	0	0	0	0	0	0	0	0	0	0	0	0	0	0	0	0	0	0	0	0	0	0.0534854	0
17	Ishikawa	46	Communication equipment	0	0	0	0	0	0	0	0	0	0	0	0	6.19602e-05	0	0	0	0	0	0	0	1.80762e-05	0	0	0	0	0	0	0	0	0	0	0	0	0	0	0	0	0.00035094	6.58068e-05	0	0	9.40935e-06	0.000762353	7.81568e-06	0	0.0131862
17	Ishikawa	47	Electric computing equipment and accessory equipment	0	0	0	0	0	0	0	0	0	0	0	0	0	0	0	0	0	0	0	0	0	0	0	0	0	0	0	0	0	0	0	0	0	0	0	0	0	0	8.18204	0	0	0	0	0	0	1.58414
17	Ishikawa	48	Semiconductor devices and integrated circuits	0	0	0	0	0	0	0	0	0	0	0	0	0	0	0	0	0	0	0	0	0	0	0	0	0	0	0	0	0	0	0	0	0	0	0	0	0.290606	1.05674	6.86937	1.86425	113.824	70.6843	467.351	3.51893	4.2311	607.062
17	Ishikawa	49	Other electrical equipment	0	0	0	0	0	0	0	0	0	0	0	0.0742464	3.59827	0	0	0	0	0	0	0	0	0	0	0	0	0	0	0	0	0	0	0	0	0	0.0556853	0	0.149459	10.6884	22.4544	0.61443	91.0983	63.9454	546.899	1.69451	3.07756	714.643
17	Ishikawa	50	Passenger motor cars	0	0	0	0	0	0	0	0	0	0	0	0	0	0	0	0	0	0	0	0	0	0	0	0	0	0	0	0	0	0	0	0	0	0	0	0	0	0	0	0	0	0	0	0	0	0
17	Ishikawa	51	Other cars	0	0	0	0	0	0	0	0	0	0	0	0	0	0	0	0	0	0	0	0	0	0	0	0	0	0	0	0	0	0	0	0	0	0	0	0	0	0	0	0	0	0	0	0	0	0
17	Ishikawa	52	Motor vheicle parts and accessories	0	0	0	0	0	0	0	0	0	0	0	0	0	0	0	0	0	0	0	0	0	0	0	0	0	0	0	0	0	0	0	0	0	0	0	0	0	0	0.0347059	0	0	0	0	0	0	0
17	Ishikawa	53	Other transportation equipment	3.72799	0	0	0	0	0	0	0	0	0	0	0	0	0	0	0	0	0	0	0	0	0	0	0	0	0	0	0	0	0	0	0	0	0	0	0	0	0	0	0	0	0	0	0	0	0
17	Ishikawa	54	Precision instruments	0.183069	0	0	0	0	0	0.00153886	0.00142775	0.00175682	0	0.00252325	0.00493939	0.0053196	0	0	0	0	0	0	0.00720798	0.00310387	0	0	0.0273035	0	0	0	0	0	0	0	0	0	0	0.00185229	0.00355299	0.00497151	0.617665	1.69948	0.00943296	0.530429	0.277898	0.462839	0.00134203	0.00206809	0.557152
17	Ishikawa	55	Miscellaneous manufacturing products	1.14796	0	0.0138661	0	2.51528	0.393255	0.040207	26.5853	0.351912	5.46014	0.0439511	0.387165	0.833935	0	0	0	0.0666107	0	0	0.544059	0	0	0.177706	0.264214	0.157033	0.559638	0.200755	0.0577554	1.40396	0	0	0.579492	0.0285133	0	0.258112	0.495101	0.346385	4.43472	1.39745	0.219077	0	0.225142	0.950062	0.0584405	0.0180115	3.82919
17	Ishikawa	56	Reuse and recycling	0	0	0	0	0	0.805519	0	0	0	0	0.0329676	0	0	0	0.0299888	0	0	0	0	0	0	0	0	0.878117	0.00402701	0.0488728	0.0617786	0.00266598	0.00279338	0	0.164353	0.727579	0.0658083	0.467546	1.08719	0	0	0	0	0	0	0	0	0	0	0
17	Ishikawa	57	Building construction and repair of construction	0	0	0	0	0	0	0	0	0	0	0	0	0	0	0	0	0	0	0	0	0	0	0	0	0	0	0	0	0	0	0	0	0	0	0	0	0	0	0	0	0	0	0	0	0	0
17	Ishikawa	58	Public construction	0	0	0	0	0	0	0	0	0	0	0	0	0	0	0	0	0	0	0	0	0	0	0	0	0	0	0	0	0	0	0	0	0	0	0	0	0	0	0	0	0	0	0	0	0	0
17	Ishikawa	59	Other civil enginnering and construction	0	0	0	0	0	0	0	0	0	0	0	0	0	0	0	0	0	0	0	0	0	0	0	0	0	0	0	0	0	0	0	0	0	0	0	0	0	0	0	0	0	0	0	0	0	0
17	Ishikawa	60	Electricity	9.34933	0	0.519821	0	330.954	22.9802	4.11696	13.8177	6.78041	19.3609	9.18512	23.8294	228.99	0.0892714	10.4692	0	3.89106	0.0314485	0	70.3206	6.03506	6.57856	4.17615	71.0057	43.6689	4.93822	22.4095	0.310233	8.65469	0	115.947	22.4117	12.6835	10.3347	5.74077	19.0108	70.6812	58.0991	59.8331	27.7185	15.9862	27.1631	12.7126	6.63141	4.53509	47.6739
17	Ishikawa	61	Gas supply and heat supply	0.00112108	0	0	0	2.14788	0.211921	0.0204966	0.0124592	0.00161376	0.0256693	0.00579446	0.114564	0.0366483	0	0.0107677	0	0.00702549	0	0	0.1887	0.0680708	0	0.00281143	0.228509	0.054288	0.0779696	0.0317606	0.00335033	0.00797828	0	0.579184	0.0397277	0.00225549	0.005935	0.014037	0.0562984	0.198651	0.0857974	0.0576068	0.0267166	0.0424771	0.0678986	0.025051	0.0453037	0.00189969	0.186401
17	Ishikawa	62	Water supply and waste management services	0.0267612	0	0.000430994	0	3.71173	0.420559	0.0581126	0.0272483	0.0171208	0.0740035	0.0481554	0.14842	0.66098	0	0.0475989	0	0.0316775	0.000873497	0	0.849764	0.253331	0.0110518	0.0099424	0.187244	0.0968063	0.0222138	0.575636	0.00161566	0.0914153	0	0.36521	0.0108072	0.0172822	0.0228406	0.0188034	0.0981048	0.181685	0.586033	0.487281	0.149383	0.185562	0.159423	0.109473	0.0299719	0.0235134	0.239969
17	Ishikawa	63	Commerce	54.9197	0	0.140679	0	1381.59	64.199	5.53782	89.7771	15.2833	92.0727	15.1608	182.354	713.796	0.098102	9.55305	0	4.10394	0.190076	0	217.625	35.1049	0.932814	9.04738	111.147	61.8605	5.61504	98.937	0.298306	11.2299	0	112.007	9.70608	76.7122	2.35688	11.4865	50.1449	99.1977	180.478	218.386	58.9507	137.547	95.2347	198.911	42.5492	5.36578	336.801
17	Ishikawa	64	Financial and insurance	1.27712	0	0.00750462	0	4.54022	0.470721	0.21019	2.46956	0.143411	1.6525	0.175971	2.90977	7.32063	0.000981249	0.127404	0	0.0250719	0.000691348	0	1.06483	0.252376	0.0618134	0.0157383	0.901863	0.869211	0.193677	3.8053	0.011935	0.247428	0	1.07132	0.122317	0.474533	0.227681	0.0714352	0.677128	0.793288	2.39661	1.74023	1.823	0.688877	1.04889	0.81386	0.113865	0.0392142	1.79688
17	Ishikawa	65	Real estate agencies and rental services	0.0459014	0	9.97988e-05	0	0.217239	0.0193704	0.00390666	0.0818889	0.00181702	0.0772258	0.00925265	0.149545	0.254589	0	0.00701385	0	0.0011506	0	0	0.0456337	0.0278708	0.000682426	0.00613924	0.19739	0.0506714	0.00342915	0.210232	0.000374115	0.00640257	0	0.0538149	0.0130128	0.00954268	0.00328767	0.00261241	0.024387	0.0740901	0.124084	0.127494	0.0765717	0.0260876	0.10315	0.0822012	0.0310413	0.00291677	0.0938932
17	Ishikawa	66	House rent	0	0	0	0	0	0	0	0	0	0	0	0	0	0	0	0	0	0	0	0	0	0	0	0	0	0	0	0	0	0	0	0	0	0	0	0	0	0	0	0	0	0	0	0	0	0
17	Ishikawa	67	Transport	40.0656	0	1.07951	0	128.191	12.8949	1.08733	7.92387	5.41674	11.4466	1.44251	18.0427	132.74	0	2.16309	0	0.451983	0	0	30.9081	7.91526	1.14999	0.471841	15.3428	5.43923	1.85928	126.465	0.0567965	21.2929	0	36.3876	1.27651	6.23887	0.904926	2.13373	14.6521	23.227	31.4566	24.6784	14.421	15.2479	11.7275	27.0209	2.98845	0.451667	57.6809
17	Ishikawa	68	Communication	2.09738	0	0.0138833	0	2.4017	0.147653	0.0681269	1.44804	0.0141411	1.92173	0.0787023	2.1569	13.306	0	0.111511	0	0.0153907	0	0	2.31109	6.00238	0.186217	0.197088	2.2893	2.34229	0.166003	0.394276	0	0.134231	0	0.847989	0.251722	0.0592933	0.253918	0.24228	1.78743	1.8908	6.61485	3.03333	1.98679	1.88299	2.61727	2.43664	0.321371	0.0499398	3.86139
17	Ishikawa	69	Broadcasting	0	0	0	0	0	0	0	0	0	0	0	0	0	0	0	0	0	0	0	0	0	0	0	0	0	0	0	0	0	0	0	0	0	0	0	0	0	0	0	0	0	0	0	0	0	0
17	Ishikawa	70	Information services	2.00509	0	0.0107641	0	7.87621	1.03032	0.0717881	0.457546	0.138968	3.69649	0.133063	3.5966	13.1471	0	0.108072	0	0.0527433	0	0	2.78262	4.04485	0.00368026	0.107602	4.52875	1.67414	0.332876	1.95584	0.0161405	0.231129	0	1.70942	0.302301	0.783563	0.18501	0.278013	1.00169	3.42841	7.32118	8.9796	3.19514	3.81789	7.89438	15.9811	2.86899	0.0419463	16.9833
17	Ishikawa	71	﻿Internet based services	0.00507559	0	0	0	0.023515	0.00440116	0.000599976	0.00946316	0.00114159	0.0243168	0.000655847	0.0198998	0.0874546	0	0.000830961	0	0	0	0	0.00749405	0.0576837	0.000235812	0.000530353	0.0425807	0.00624875	0.00180563	0.0129813	0	0.00126423	0	0.00572176	0.00276713	0.00042548	0.00039515	0.00264797	0.0161612	0.0209983	0.0418982	0.0249649	0.0122592	0.0152011	0.034856	0.0204554	0.00366265	0.000268771	0.0936908
17	Ishikawa	72	Image information production and distribution industry	0.196356	0	0.0125131	0	1.58776	0.0352272	0.0469553	0.718822	0.0268028	0.559466	0.0244974	1.02075	4.55225	0	0.0709446	0	0.0106078	0	0	0.96639	0.210941	0.00251661	0.0339598	0.475462	0.677985	0.0734661	1.44932	0.00183952	0.104081	0	0.357655	0.0332224	0.0590299	0.0126512	0.0205523	0.251319	0.951545	0.651907	0.601811	0.283467	0.626271	0.954614	1.57134	0.22336	0.0286834	1.92569
17	Ishikawa	73	Public administration	0	0	0	0	0	0	0	0	0	0	0	0	0	0	0	0	0	0	0	0	0	0	0	0	0	0	0	0	0	0	0	0	0	0	0	0	0	0	0	0	0	0	0	0	0	0
17	Ishikawa	74	Education and Research	0.147895	0	0.00494699	0	10.1174	0.943272	0.0922151	0.635973	0.0315827	2.36543	0.0386409	1.80224	0.68182	0.0162632	1.35948	0	0.407393	0.0171876	0	31.9694	24.6188	0.0120813	0.144008	17.0926	9.19735	2.01608	3.98786	0.0450373	0.548695	0	3.43394	0.207335	0.00653955	0.801685	0.793011	1.56607	1.42171	14.2756	26.2695	2.13753	22.0144	26.2066	44.8859	8.91325	0.618266	64.7233
17	Ishikawa	75	Medical service, health and social security and nursing care	0.0503042	0	0.00172692	0	0.679356	0.128564	0.00500747	0.212164	0.00762225	0.102793	0.0136844	0.235734	0.285615	0	0.0254294	0	0.00331834	0	0	0.474308	0.338351	0.00196812	0.0177055	0.371836	0.299878	0.0207212	0.508382	0.0014386	0.00602939	0	0.129619	0.0230948	0.0781243	0.00494695	0.00602735	0.0732224	0.231875	0.86278	0.568699	0.542277	0.725813	0.199783	0.223123	0.0232906	0.00448638	0.868837
17	Ishikawa	76	Advertising and survery	1.55336	0	0.00434582	0	7.77264	3.11814	0.0162018	0.192075	0.0359654	2.03108	0.399225	4.37411	0.826103	0.00178586	0.0959904	0	0.00536828	0	0	29.189	2.5544	0.00318394	0	2.92431	1.63	0.0487592	0.211228	0.00775769	0.0942898	0	0.529752	0.0684968	0.0402139	0.00533532	0.0325027	0.29718	0.407106	1.36229	1.22273	1.06303	1.19169	1.09529	2.01445	0.322623	0.0822562	3.95955
17	Ishikawa	77	Giids rental and leasing services	2.30637	0	0.0269169	0	19.8836	0.980738	0.312199	1.05403	0.310214	4.66511	0.291503	6.28159	31.4173	0	0.58453	0	0.0488484	0	0	3.60618	0.539329	0.0988461	1.46418	10.9417	4.29776	0.546447	8.93433	0.0323887	0.694393	0	3.13093	0.60995	1.01475	0.119943	0.563678	2.48281	8.47039	29.1597	22.4065	12.5573	10.1071	21.4183	16.692	3.09325	0.244747	39.7942
17	Ishikawa	78	Other business services	0.395728	0	0.00605301	0	5.63647	0.263633	0.0539086	0.649824	0.0978022	1.26567	0.0592713	2.21054	19.9283	0.000829135	0.202574	0	0.015785	0.00116835	0	1.6116	0.831093	0.0295647	0.0930894	3.5936	1.98686	0.356546	3.09438	0.00324155	0.188315	0	0.584136	0.272481	0.0853506	0.128808	0.121729	0.749692	1.33725	3.84643	2.95381	1.03405	1.94792	2.26048	5.0043	0.631948	0.084242	4.28719
17	Ishikawa	79	Personal services	7.14381	0	0	0	3.10231	0.109396	0	0.511946	0.051076	0.47098	0	0.765883	5.74809	0	0.0413091	0	0	0	0	1.04779	0.315837	0	0	1.23479	0.427131	0.042076	0.893541	0	0.0134675	0	0.548569	0.0515853	0.190365	0	0.0359011	0.241024	0.674506	1.19716	0.985552	0.457075	0.685386	1.47182	0.936342	0.29913	0	1.93204
17	Ishikawa	80	Activities not elsewhere classified	0	0	0	0	0	0	0	0	0	0	0	0	0	0	0	0	0	0	0	0	0	0	0	0	0	0	0	0	0	0	0	0	0	0	0	0	0	0	0	0	0	0	0	0	0	0
18	Fukui	1	Agriculture, forestry and fishery	10.7989	0	0	0	316.075	8.76725	0.815775	0.0333915	9.18989	0	0.0344238	0.0192533	0	0	0.0498459	0	0.0298123	0	0	0.468267	0.647276	0	0.270416	0	53.4923	0	0	0	0.157089	0	0	0	0	0	0.00722004	0	0	0	0	0	0	0	0	0	0	0
18	Fukui	2	Metallic ores	0	0	0	0	0	0	0	0	0	0	0	0	0	0	0	0	0	0	0	0	0	0	0	0	0	0	0	0	0	0	0	0	0	0	0	0	0	0	0	0	0	0	0	0	0	0
18	Fukui	3	Non-metallic ores	0	0	0	0	0	0	0	0	0	0	0	0	0	0	0	0	0	0	0	0	0	0	0	0	0	0	0	0	0	0	0	0	0	0	0	0	0	0	0	0	0	0	0	0	0	0
18	Fukui	4	Coal mining, crude petroleum and natural gas	0	0	0	0	0	0	0	0	0	0	0	0	0	0	0	0	0	0	0	0	0	0	0	0	0	0	0	0	0	0	0	0	0	0	0	0	0	0	0	0	0	0	0	0	0	0
18	Fukui	5	Food and Tobacco	4.61312	0	0	0	1050.34	29.1302	0	0.909282	0.00726526	0	0.0417392	0	0	0	0.00881397	0	0.00632584	0	0	4.68985	1.01404	0	0	0.0125459	0	0	0	0	0.034482	0	0	0	0	0	0	0	0	0	0	0	0	0	0	0	0	0
18	Fukui	6	Beverage	0.1272	0	0	0	0.430651	1.9381	0	0	0	0	0	0	0	0	0	0	0.00142344	0	0	0	0.00144418	0	0	0	0	0	0	0	0	0	0	0	0	0	0	0	0	0	0	0	0	0	0	0	0	0
18	Fukui	7	Textile products	13.2052	0	0	0	0	0.250285	118.872	1773.24	0	29.3092	2.12591	13.5799	23.3532	0	0	0	0	0	0	0.213086	0	0	0	8.07159	123.13	0.539083	0	0	3.20444	0	0	0	0	0	0.657098	0.315105	1.76364	1.06886	22.448	0	0	0	0	0.119021	2.01755	3.15734
18	Fukui	8	Wearing aparel and other textile products	32.1636	0	0.0996968	0	86.8442	2.04488	7.97052	39.8106	2.21592	6.65171	0.711015	16.3045	12.4202	0	0.514777	0	0.164204	0	0	10.0588	1.91585	0	3.8331	2.36104	5.0539	1.32831	5.77366	0	2.98357	0	6.41405	0.642835	2.02081	0.0815979	0.944478	2.19306	8.07186	12.2097	7.15664	9.78846	6.78899	21.2029	11.7101	1.65673	0.499507	31.0508
18	Fukui	9	Timber and wooden products	1.41987	0	0	0	6.85421	0.298474	0	0.49076	55.9043	112.117	13.4934	43.5554	0.632943	0	0	0	0	0	0	0.667045	0	0	0	0.721924	0.0264857	1.13651	0.0507898	0.140273	0.569536	0	0	0.492604	0	0	1.07747	1.31521	2.85904	0.637327	0.746931	0.249414	3.1646	0.662157	0.741684	0.195164	0.0273409	0.847178
18	Fukui	10	Furniture and fixtures	0.0417689	0	0	0	3.48324	0.120729	0.0394994	0.696302	0.0300625	23.265	0.0431776	1.05653	1.86609	0	0.0547063	0	0.0523507	0	0	1.45955	0.212453	0	0	1.14208	0.32568	0.0371479	0.361573	0.0113478	0.214022	0	0.430505	0.091087	0	0	0.0475444	0.0607985	0.297753	0.386687	0.850784	0.29593	0.325829	0.511479	0.800007	0.0918592	0.0530835	4.91927
18	Fukui	11	Pulp, paper, paperboard, building paper	0.0218371	0	0	0	1.21404	0.0252473	0.178972	0.0510922	0.36149	2.73915	32.4834	99.6906	96.823	0	0.305076	0	0	0.0384898	0	2.96629	0.0277681	0	0	0.895636	0.250922	0.124296	0	0	0.39784	0	0.112536	0	0.0878678	0	0.0497132	0	0.0222382	0.0269551	0	0.0843898	0	1.8357	0.0278834	0.0240124	0.0185017	0.796234
18	Fukui	12	Paper products	4.02056	0	0	0	134.332	12.419	0.214381	1.59122	0.0431901	5.95404	0	4.81679	6.23379	0.0250204	0.331847	0	0.0501407	0	0	82.8131	3.7899	0	0	2.26232	0.607446	1.6082	0.944479	0.141294	0.239151	0	0	0	0.0804869	0	0.0151791	0	1.97591	0.641963	0.0555592	0.566874	0.691021	0.966532	0.996105	0.32993	0.152528	3.44253
18	Fukui	13	Publishing, printing	0.11655	0	0.0028156	0	82.3712	1.70685	0.0734784	3.65863	0.0838854	2.41081	0.00669341	27.4109	1102.16	0	0.214841	0	0	0	0	27.7249	0.510486	0.00962657	0.0216506	0.241426	0.393268	0.773967	0.163058	0	0.132711	0	0.467159	0.183564	0.0347388	0.0080656	0.127752	0.2639	2.92772	2.54164	2.26609	1.03428	7.85071	1.01148	2.61263	0.0996802	0.373049	14.6662
18	Fukui	14	Chemical fertilizer	0	0	0	0	0	0	0	0	0	0	0	0	0	0	0	0	0	0	0	0	0	0	0	0	0	0	0	0	0	0	0	0	0	0	0	0	0	0	0	0	0	0	0	0	0	0
18	Fukui	15	Basic inorganic chemical products	0	0	0	0	38.3118	1.15084	1.90354	0.0194077	0	0.165156	0.497333	1.34284	0.14462	0.332022	29.4637	0	3.38923	0.0584822	0	133.644	20.2097	0	0	7.34033	25.7892	6.44477	1.04444	0	0.0944509	0	10.1739	0.108535	0.0445027	0.0413303	0.0503568	1.11081	0.91231	0.696254	0.706554	0.940306	0.406729	1.03222	2.07596	0.89388	0	2.68579
18	Fukui	16	Basic organic chemical products	0	0	0	0	0	0	0	0	0	0	0	0	0.0546813	0	0	0	0.06486	0	0	0.882934	0.0219349	0	0	0	0.00257418	0	0	0	0	0	0	0	0	0	0	0	0	0.00387141	0	0	0	0	0	0	0	0
18	Fukui	17	Organic chemical products	0.342934	0	0	0	3.21996	0.570944	1.0147	0.00534908	0.0296186	0.0273118	0.132347	0.0555163	0.378668	0	0.479097	0	5.28958	0.342522	0	42.9375	9.03838	0	0.015289	5.9898	7.76846	0.0699455	0	0	0.0260323	0	0	0	0	0.00284784	0.052047	0.00665563	0.0465645	0.208832	0.00423344	0.0530109	0.754137	0.102904	0.0233539	0.0125698	0.077481	0.0833614
18	Fukui	18	Synthetic resins	0	0	0	0	0	0	0.0692038	0	0	0.305979	0.340417	0.888512	0.191381	0	0	0	0	0	0	61.1127	0	0	0	86.9597	0	0	0	0	0.0874932	0	0	0	0	0	0.0499792	0	0	0	0	0.0848414	0.293585	2.70289	0	0.108634	0.111604	2.43351
18	Fukui	19	Synthetic fibers	0	0	0	0	0	0	16.2225	54.274	0	1.14275	0.148326	0	0	0	0	0	0	0	0	0	0	0	0.319852	1.54556	0.314048	0	0	0	0	0	0	0	0	0	0	0	0	0	0	0	0	0	0	0	0	0
18	Fukui	20	Final chemical products	1.55122	0	0.0553721	0	11.0895	0.615668	0.919572	1.27299	2.26626	5.11684	1.44797	23.8003	411.177	0	4.16446	0	0.768979	0	0	202.076	13.4103	0.172107	1.35477	7.85568	2.77439	0.164729	1.12964	0	1.80585	0	0.536917	0.201958	0.0621072	0	0.2284	0.539211	3.44236	1.42894	1.32903	1.01403	10.5784	1.76238	1.49293	0.801953	0.0392323	4.20411
18	Fukui	21	Medicaments	14.1884	0	0	0	0.819968	0	0	0.011215	0	0	0	0	0	0	0	0	0	0	0	3.85009	23.0522	0	0	0	0	0	0	0	0	0	0	0	0	0	0	0	0	0	0	0	0	0	0	0	0	0
18	Fukui	22	Petroleum refinery products	0.0274352	0	2.5437e-05	0	0.0693799	0.000608693	0.00224963	0.000376381	0.000210513	0.0011647	0.000786113	0.0022491	0.0696709	7.3171e-05	0.00577175	0	0.00307932	0	0	0.0155467	0.000557889	0.00573998	0.0220048	0.000799744	0.00206452	0.00561877	0.00267002	0.000254281	0.00273094	0	0.0167311	0.000382702	0	0.000255035	0.000665858	0.00187326	0.0061359	0.00281609	0.000974883	0.00067819	0.000260756	0.00100673	0.000896328	0.00173676	0	0.00127977
18	Fukui	23	Coal products	0	0	0	0	0	0	0	0	0	0	0.0128721	0	0	0	0.050739	0	0.0624269	0	0	0.00817127	0	0	0	0	0	0	0	0	0.17487	0	2.31015	0.814641	0	0.103406	0.0377969	0.0120834	0	0	0.0307436	0.0106936	0	0	0	0	0	0.0121075
18	Fukui	24	Plastic products	3.59949	0	0	0	73.4748	8.9527	0.133487	3.75085	0.566031	9.24448	0.672262	31.3389	278.382	0.0378353	0.818745	0	0.0189554	0	0	41.445	6.5772	0	0	203.796	14.2502	0.54879	0.142822	0	0.241093	0	0	0	0	0.0188391	2.2724	0.968627	1.87901	2.24022	19.5476	2.49372	16.3484	11.3722	7.85975	10.5936	0.691948	64.079
18	Fukui	25	Rubber products	0.0606377	0	0.000131183	0	0.0541866	0.00104638	0.000950962	0.0146462	0.00065139	0.00900986	0.00062371	0.0122095	0.0660752	0	0.000263415	0	0.000567163	0	0	0.00772075	0.00326074	0	0.00100873	0.00749893	0.254292	0	0.0175683	0	0.00721371	0	0.0256523	0.000328943	0.000404632	0	0.000228929	0.0175649	0.0125961	0.149327	0.134629	0.0240942	0.176836	0.0726861	0.0639448	0.0137669	0.00306721	0.1639
18	Fukui	26	Glass and glass products	0.0449683	0	0	0	11.6027	32.4942	0	0	0	14.8178	0	0	0.147002	0	0.431909	0	0	0	0	42.847	5.26071	0	0	4.58292	0.221449	5.23113	0.0707761	0	0.665645	0	0	0	0	0	0	0.327278	0.549532	0.610583	0.0832684	0	3.10697	0.178591	6.05771	2.89269	0.152399	1.57407
18	Fukui	27	Cement and cement products	0	0	0	0	0	0	0	0	0	0	0	0	0	0	0	0	0	0	0	0	0	0	0	0	0	0	25.2679	0	0.0153615	0	0	0	0	0	0	0	0	0	0	0	0	0	0	0	0	0
18	Fukui	28	Pottery, china and earthenware	0	0	0	0	0.0882329	0	0	0	0	0.0840242	0	0	0	0	0.00245655	0	0	0	0	0.00276931	0	0	0	0.00349668	0	0	0.00442806	0.00764349	0	0	0	0	0	0	0	0	0.00573018	0.00347279	0	0	0	0.10801	0.00718477	0.00154683	0	0.0984804
18	Fukui	29	Other ceramic, stone and clay products	0.0659419	0	0	0	0.250671	0	0	0	0	0.109411	0.018935	0	0.0239517	0	0.562982	0	0	0	0	0.0937565	0.0559012	0	0.685971	0.0910629	0.0240544	0.271078	19.362	0.0437926	2.3777	0	0.283189	0.223692	0	0.00456336	0.0500399	0.159974	0.581994	4.78432	0.712282	0.566296	0.0489902	0.557724	0.224533	0.217532	0.00620775	0.379361
18	Fukui	30	Pig iron and crude steel	0	0	0	0	0	0	0	0	0	0	0	0	0	0	0.0143068	0	0	0	0	0	0	0	0	0	0	0	0	0	0	0	-19.1255	5.54732	-4.75795	0	0	-0.477	-4.97244	-1.58768	-3.39813	-0.263835	-0.191724	-0.455513	-0.00523044	-0.0270259	-0.0277648	-0.233001
18	Fukui	31	steel products	0.00100822	0	0	0	0	0	0	0	0.00362824	0.477259	0	0	0	0	0	0	0	0	0	0	0	0	0	0.0494963	0.0591663	0	0.134881	0	0.00229602	0	10.7604	0.127522	7.00548	0	0.00420795	0.790276	3.31943	1.08024	1.17056	0.358456	0.202801	0.821179	0.127128	0.151885	0.0217826	0.184913
18	Fukui	32	Cast and forged steel products	0	0	0	0	0	0	0	0	0	0.00448918	0	0	0	0	0	0	0	0	0	0	0	0	0	0	0	0	0	0	0.000256732	0	0	0	0	0	0.000342194	0.0511978	0.039493	0.473688	0.240483	0.252104	0.0623129	0.0937237	0.0187133	0.00322307	0.000382061	0.00526154
18	Fukui	33	Other iron or steel products	0	0	0	0	0	0	0	0	0	1.4992	0	0	0	0	0.00146755	0	0	0	0	0.00248159	0	0	0	0.00208892	0	0	0.027776	0	0.00956892	0	0	0.0238241	0	0	0.00318856	2.41222	4.67013	1.83088	1.23089	0.229498	0.34557	0.470591	0.00536525	0.114586	0.0534007	0.669832
18	Fukui	34	Non-ferrous metals	0	0	0	0	0	0	0	0	0	0.165079	0.00285691	0	-2.03579	0	3.1564	0	0.0831327	0	0	8.95005	0	0	0	0.171745	-0.00453666	0.27529	0	0.0150169	0.261193	0	26.9753	0.0783497	-0.0593095	5.03652	35.6319	-0.297689	5.5839	-0.416194	0.701108	0.427214	-0.129354	1.82202	0.278784	21.7167	0.00936626	0.862601
18	Fukui	35	Non-ferrous metal products	0	0	0	0	4.1518	0.221533	0	0	0.0551633	10.0335	0	0.31019	4.05056	0	0.167306	0	0	0	0	1.09392	0.0730953	0	0	2.95299	1.98154	0.0681647	0	0	0.283631	0	0	0	0	0.262546	29.4586	16.3439	29.0743	37.559	21.6077	19.8448	10.7192	42.4372	34.2772	64.0728	1.16887	157.729
18	Fukui	36	Metal products for construction and architecture	0.0303353	0	0	0	0	0	0	0	0	0.301993	0	0	0	0	0	0	0	0	0	0	0	0	0	0	0	0	0	0	0	0	0	0	0	0	0	5.07791	0.772312	0.187225	0	0.156308	0	0	0	0	0	0.0663658
18	Fukui	37	Other metal products	0.358972	0	0.00578132	0	14.4041	8.51583	0	2.07639	1.77985	15.4725	0.089334	0.914737	1.79645	0	0.592053	0	0.116645	0	0	12.053	1.2088	0.0395328	0.20005	0.925354	6.19813	0.406759	0.816097	0	2.09672	0	0	0.405909	0.0178324	0	0.302673	23.7649	54.4558	28.9331	21.1108	10.7041	17.6461	9.24917	6.7821	1.3377	0.484374	13.215
18	Fukui	38	General industrial machinery	0	0	0	0	0	0	0	0	0	0.0307559	0	0	0	0	0	0	0	0	0	0	0	0	0	0.600395	0	0.00199829	0.00442045	0	0.0367771	0	0	0.0214367	0.0301363	0	0.00426257	0.0163526	0.122987	54.0444	7.18994	1.53038	1.97807	0.589316	0.557656	0.00926504	0.0356938	0.108552
18	Fukui	39	Special industrial machinery	0	0	0	0	0	0	0	0	0	0	0	0	0	0	0	0	0	0	0	0	0	0	0	0	0	0	0	0	0	0	0	0	0	0	0	0	0	0.68636	282.161	0	0.038728	0	0.0221874	0.171964	0	0
18	Fukui	40	Other general machines	0	0	0	0	0	0	0	0	0	0.462355	0	0	0	0	0	0	0	0	0	0.0282195	0	0	0	0.078389	0	0.00407955	0	0	0.0228508	0	0	0.0312596	0	0	0.00870212	0.0584222	0.175173	11.0481	8.05853	22.2985	0.888166	1.00195	0.695527	0.0630493	0.0485798	0.606295
18	Fukui	41	Machinery for office and service industry	0	0	0	0	0	0	0	0	0	0	0	0	0	0	0	0	0	0	0	0	0	0	0	0	0	0	0	0	0	0	0	0	0	0	0	0	0	0	0	0	16.996	0	0	0	0	0
18	Fukui	42	Industrial electric equipment	0.33822	0	0	0	0	0	0	0	0	0.0594184	0	0	0	0	0	0	0	0	0	0	0	0	0	0	0	0	0	0	0	0	0	0	0	0	0	0	0	22.3233	27.5013	0.230656	20.1314	97.3715	31.3611	4.8239	0.707969	21.2841
18	Fukui	43	Applied electric equipment and electric mesuring instruments	0	0	0	0	0	0	0	0	0	0	0	0	0	0	0	0	0	0	0	0	0	0	0	0	0	0	0	0	0	0	0	0	0	0	0	0	0	0.012662	0.0530631	0.00351562	0.00933384	0.0710754	0.487753	0	0	0.0121473
18	Fukui	44	Other electric equipment	0.516763	0	0.00936289	0	0	0	0	0	0	0.385836	0	0	0	0	0	0	0	0	0	0.254331	0	0	0	0	0	0	0	0	0	0	0	0	0	0	0	0	0.789383	2.49835	7.17673	1.49778	6.28666	16.0195	9.54024	58.4102	0.547289	62.7139
18	Fukui	45	Household electric and electric applications	0	0	0	0	0	0	0	0	0	0	0	0	0	0	0	0	0	0	0	0	0	0	0	0	0	0	0	0	0	0	0	0	0	0	0	0	0	0	0	0	0	0	0	0	0.160742	0
18	Fukui	46	Communication equipment	0	0	0	0	0	0	0	0	0	0	0	0	0.00590912	0	0	0	0	0	0	0	0.00172392	0	0	0	0	0	0	0	0	0	0	0	0	0	0	0	0	0.033469	0.00627597	0	0	0.000897367	0.0727054	0.000745379	0	1.25756
18	Fukui	47	Electric computing equipment and accessory equipment	0	0	0	0	0	0	0	0	0	0	0	0	0	0	0	0	0	0	0	0	0	0	0	0	0	0	0	0	0	0	0	0	0	0	0	0	0	0	0.104898	0	0	0	0	0	0	0.0203095
18	Fukui	48	Semiconductor devices and integrated circuits	0	0	0	0	0	0	0	0	0	0	0	0	0	0	0	0	0	0	0	0	0	0	0	0	0	0	0	0	0	0	0	0	0	0	0	0	0.145994	0.530882	3.45103	0.936558	57.183	35.5103	234.787	1.76784	2.12562	304.975
18	Fukui	49	Other electrical equipment	0	0	0	0	0	0	0	0	0	0	0	0.110232	5.34227	0	0	0	0	0	0	0	0	0	0	0	0	0	0	0	0	0	0	0	0	0	0.0826747	0	0.221898	15.8689	33.3375	0.91223	135.252	94.9383	811.968	2.51581	4.56918	1061.01
18	Fukui	50	Passenger motor cars	0	0	0	0	0	0	0	0	0	0	0	0	0	0	0	0	0	0	0	0	0	0	0	0	0	0	0	0	0	0	0	0	0	0	0	0	0	0	0	0	0	0	0	0	0	0
18	Fukui	51	Other cars	0	0	0	0	0	0	0	0	0	0	0	0	0	0	0	0	0	0	0	0	0	0	0	0	0	0	0	0	0	0	0	0	0	0	0	0	0	0	0	0	0	0	0	0	0	0
18	Fukui	52	Motor vheicle parts and accessories	0	0	0	0	0	0	0	0	0	0	0	0	0	0	0	0	0	0	0	0	0	0	0	0	0	0	0	0	0	0	0	0	0	0	0	0	0	0	0.0240579	0	0	0	0	0	0	0
18	Fukui	53	Other transportation equipment	0.0532077	0	0	0	0	0	0	0	0	0	0	0	0	0	0	0	0	0	0	0	0	0	0	0	0	0	0	0	0	0	0	0	0	0	0	0	0	0	0	0	0	0	0	0	0	0
18	Fukui	54	Precision instruments	2.33183	0	0	0	0	0	0.0196012	0.0181859	0.0223773	0	0.0321397	0.0629152	0.0677582	0	0	0	0	0	0	0.0918113	0.0395354	0	0	0.347777	0	0	0	0	0	0	0	0	0	0	0.0235934	0.045256	0.0633244	7.86748	21.647	0.120152	6.75631	3.53971	5.89539	0.0170941	0.0263422	7.09669
18	Fukui	55	Miscellaneous manufacturing products	0.419253	0	0.00506412	0	0.918619	0.143623	0.0146842	9.70935	0.128524	1.99412	0.0160516	0.141399	0.304566	0	0	0	0.0243272	0	0	0.198699	0	0	0.064901	0.0964951	0.0573509	0.204388	0.0733186	0.0210931	0.512747	0	0	0.211639	0.0104135	0	0.0942665	0.180818	0.126505	1.61963	0.51037	0.0800103	0	0.0822253	0.346977	0.0213433	0.00657807	1.39848
18	Fukui	56	Reuse and recycling	0	0	0	0	0	1.36761	0	0	0	0	0.0559725	0	0	0	0.0509151	0	0	0	0	0	0	0	0	1.49087	0.00683708	0.0829765	0.104888	0.00452631	0.00474262	0	0.279039	1.23529	0.11173	0.793802	1.84584	0	0	0	0	0	0	0	0	0	0	0
18	Fukui	57	Building construction and repair of construction	0	0	0	0	0	0	0	0	0	0	0	0	0	0	0	0	0	0	0	0	0	0	0	0	0	0	0	0	0	0	0	0	0	0	0	0	0	0	0	0	0	0	0	0	0	0
18	Fukui	58	Public construction	0	0	0	0	0	0	0	0	0	0	0	0	0	0	0	0	0	0	0	0	0	0	0	0	0	0	0	0	0	0	0	0	0	0	0	0	0	0	0	0	0	0	0	0	0	0
18	Fukui	59	Other civil enginnering and construction	0	0	0	0	0	0	0	0	0	0	0	0	0	0	0	0	0	0	0	0	0	0	0	0	0	0	0	0	0	0	0	0	0	0	0	0	0	0	0	0	0	0	0	0	0	0
18	Fukui	60	Electricity	61.8994	0	3.44159	0	2191.16	152.146	27.2573	91.4834	44.8912	128.183	60.8121	157.768	1516.08	0.591041	69.3134	0	25.7617	0.208212	0	465.573	39.9565	43.5549	27.6491	470.109	289.12	32.6946	148.367	2.05397	57.3003	0	767.654	148.382	83.9738	68.4232	38.008	125.865	467.961	384.658	396.139	183.517	105.84	179.84	84.1664	43.9047	30.0256	315.636
18	Fukui	61	Gas supply and heat supply	4.10248e-05	0	0	0	0.0785996	0.00775504	0.000750051	0.000455932	5.9054e-05	0.000939343	0.000212042	0.00419235	0.00134111	0	0.000394033	0	0.000257091	0	0	0.00690528	0.00249098	0	0.000102881	0.00836205	0.00198661	0.00285322	0.00116225	0.000122602	0.000291957	0	0.0211947	0.00145379	8.25374e-05	0.000217185	0.000513671	0.00206018	0.00726944	0.00313967	0.00210806	0.000977668	0.00155441	0.00248468	0.000916715	0.00165784	6.95171e-05	0.00682114
18	Fukui	62	Water supply and waste management services	0.000396264	0	6.38191e-06	0	0.0549611	0.0062274	0.000860499	0.000403477	0.000253516	0.0010958	0.000713058	0.00219772	0.00978742	0	0.000704818	0	0.000469063	1.29343e-05	0	0.0125828	0.00375118	0.000163649	0.000147221	0.0027726	0.00143345	0.00032893	0.00852369	2.39238e-05	0.00135363	0	0.00540783	0.000160027	0.000255904	0.000338211	0.00027843	0.00145268	0.00269029	0.00867765	0.00721538	0.00221197	0.0027477	0.00236064	0.00162101	0.000443806	0.000348173	0.00355332
18	Fukui	63	Commerce	0.480522	0	0.00123088	0	12.0883	0.561712	0.0484535	0.785509	0.133722	0.805594	0.13265	1.59551	6.24539	0.000858348	0.0835849	0	0.0359076	0.00166308	0	1.90412	0.307152	0.0081617	0.0791605	0.972485	0.541252	0.049129	0.865654	0.00261004	0.0982565	0	0.980013	0.0849239	0.671197	0.0206216	0.100502	0.438745	0.867935	1.5791	1.91078	0.515792	1.20347	0.833261	1.74038	0.372287	0.0469482	2.94686
18	Fukui	64	Financial and insurance	0.00335075	0	1.96897e-05	0	0.0119121	0.00123502	0.000551471	0.00647934	0.000376265	0.00433564	0.000461693	0.0076343	0.019207	2.57448e-06	0.000334267	0	6.57805e-05	1.81388e-06	0	0.00279377	0.000662153	0.000162178	4.12921e-05	0.0023662	0.00228053	0.000508146	0.00998389	3.13137e-05	0.000649172	0	0.00281079	0.00032092	0.00124502	0.000597363	0.000187423	0.00177657	0.00208133	0.00628793	0.00456581	0.00478296	0.00180739	0.00275196	0.00213531	0.000298745	0.000102886	0.00471445
18	Fukui	65	Real estate agencies and rental services	0	0	0	0	0	0	0	0	0	0	0	0	0	0	0	0	0	0	0	0	0	0	0	0	0	0	0	0	0	0	0	0	0	0	0	0	0	0	0	0	0	0	0	0	0	0
18	Fukui	66	House rent	0	0	0	0	0	0	0	0	0	0	0	0	0	0	0	0	0	0	0	0	0	0	0	0	0	0	0	0	0	0	0	0	0	0	0	0	0	0	0	0	0	0	0	0	0	0
18	Fukui	67	Transport	10.9588	0	0.295268	0	35.0629	3.52701	0.297408	2.16734	1.48159	3.13087	0.394557	4.93505	36.3073	0	0.591649	0	0.123627	0	0	8.45399	2.16499	0.314546	0.129058	4.19658	1.48774	0.508551	34.5907	0.015535	5.82406	0	9.95277	0.349152	1.70646	0.247516	0.58362	4.00764	6.35306	8.60403	6.75005	3.94444	4.17063	3.20771	7.39078	0.817402	0.12354	15.7769
18	Fukui	68	Communication	0.144516	0	0.000956601	0	0.165484	0.0101737	0.00469415	0.0997741	0.000974362	0.132413	0.00542282	0.148617	0.916821	0	0.00768341	0	0.00106047	0	0	0.159241	0.413582	0.0128309	0.0135799	0.15774	0.161391	0.0114381	0.0271668	0	0.00924893	0	0.058429	0.0173444	0.00408548	0.0174957	0.0166938	0.123159	0.130282	0.455783	0.209005	0.136896	0.129743	0.180338	0.167891	0.0221434	0.003441	0.266062
18	Fukui	69	Broadcasting	0	0	0	0	0	0	0	0	0	0	0	0	0	0	0	0	0	0	0	0	0	0	0	0	0	0	0	0	0	0	0	0	0	0	0	0	0	0	0	0	0	0	0	0	0	0
18	Fukui	70	Information services	0	0	0	0	0	0	0	0	0	0	0	0	0	0	0	0	0	0	0	0	0	0	0	0	0	0	0	0	0	0	0	0	0	0	0	0	0	0	0	0	0	0	0	0	0	0
18	Fukui	71	﻿Internet based services	9.8624e-06	0	0	0	4.5692e-05	8.55192e-06	1.16582e-06	1.83879e-05	2.21822e-06	4.72501e-05	1.27438e-06	3.86673e-05	0.000169933	0	1.61464e-06	0	0	0	0	1.45617e-05	0.000112085	4.58208e-07	1.03053e-06	8.27387e-05	1.2142e-05	3.50852e-06	2.52241e-05	0	2.45654e-06	0	1.1118e-05	5.37682e-06	8.26753e-07	7.67817e-07	5.14529e-06	3.14029e-05	4.08019e-05	8.14126e-05	4.85093e-05	2.38208e-05	2.95372e-05	6.77288e-05	3.97469e-05	7.11691e-06	5.22249e-07	0.000182051
18	Fukui	72	Image information production and distribution industry	0.0161707	0	0.00103051	0	0.130759	0.00290111	0.00386696	0.0591981	0.00220733	0.0460744	0.00201746	0.0840635	0.374897	0	0.00584259	0	0.000873597	0	0	0.0795863	0.0173719	0.000207253	0.00279674	0.0391563	0.055835	0.00605024	0.119358	0.000151492	0.00857152	0	0.0294544	0.00273601	0.00486136	0.00104188	0.00169257	0.0206972	0.0783638	0.0536873	0.0495617	0.0233447	0.0515761	0.0786165	0.129406	0.0183947	0.0023622	0.158588
18	Fukui	73	Public administration	0	0	0	0	0	0	0	0	0	0	0	0	0	0	0	0	0	0	0	0	0	0	0	0	0	0	0	0	0	0	0	0	0	0	0	0	0	0	0	0	0	0	0	0	0	0
18	Fukui	74	Education and Research	0	0	0	0	0	0	0	0	0	0	0	0	0	0	0	0	0	0	0	0	0	0	0	0	0	0	0	0	0	0	0	0	0	0	0	0	0	0	0	0	0	0	0	0	0	0
18	Fukui	75	Medical service, health and social security and nursing care	0	0	0	0	0	0	0	0	0	0	0	0	0	0	0	0	0	0	0	0	0	0	0	0	0	0	0	0	0	0	0	0	0	0	0	0	0	0	0	0	0	0	0	0	0	0
18	Fukui	76	Advertising and survery	0	0	0	0	0	0	0	0	0	0	0	0	0	0	0	0	0	0	0	0	0	0	0	0	0	0	0	0	0	0	0	0	0	0	0	0	0	0	0	0	0	0	0	0	0	0
18	Fukui	77	Giids rental and leasing services	0.00098122	0	1.14515e-05	0	0.00845926	0.000417244	0.000132822	0.000448426	0.000131977	0.00198472	0.000124017	0.00267243	0.0133662	0	0.000248682	0	2.0782e-05	0	0	0.00153421	0.000229451	4.2053e-05	0.000622918	0.00465503	0.00182844	0.00023248	0.00380101	1.37794e-05	0.000295422	0	0.00133202	0.000259497	0.000431714	5.10285e-05	0.000239811	0.00105629	0.00360364	0.0124057	0.00953261	0.00534238	0.00429995	0.00911216	0.00710143	0.00131599	0.000104125	0.01693
18	Fukui	78	Other business services	0.00100401	0	1.53572e-05	0	0.0143004	0.000668869	0.000136772	0.00164868	0.000248136	0.00321115	0.000150378	0.00560841	0.0505603	2.10361e-06	0.000513953	0	4.00485e-05	2.96424e-06	0	0.00408882	0.00210858	7.50091e-05	0.000236179	0.00911739	0.00504091	0.000904599	0.0078508	8.2242e-06	0.000477778	0	0.00148202	0.000691317	0.000216544	0.0003268	0.000308839	0.00190206	0.00339275	0.00975885	0.00749415	0.00262349	0.0049421	0.0057351	0.0126965	0.00160332	0.000213732	0.0108771
18	Fukui	79	Personal services	2.37273	0	0	0	1.03039	0.0363346	0	0.170036	0.0169642	0.15643	0	0.254378	1.90915	0	0.0137203	0	0	0	0	0.34801	0.104901	0	0	0.410121	0.141866	0.013975	0.296778	0	0.00447304	0	0.1822	0.0171334	0.0632273	0	0.0119241	0.0800532	0.224029	0.397622	0.327338	0.151812	0.227642	0.488845	0.310994	0.0993523	0	0.641703
18	Fukui	80	Activities not elsewhere classified	0	0	0	0	0	0	0	0	0	0	0	0	0	0	0	0	0	0	0	0	0	0	0	0	0	0	0	0	0	0	0	0	0	0	0	0	0	0	0	0	0	0	0	0	0	0
19	Yamanashi	1	Agriculture, forestry and fishery	20.8733	0	0	0	610.944	16.9463	1.57682	0.0645427	17.7632	0	0.0665381	0.0372148	0	0	0.0963475	0	0.0576243	0	0	0.905118	1.25112	0	0.52269	0	103.396	0	0	0	0.303638	0	0	0	0	0	0.0139557	0	0	0	0	0	0	0	0	0	0	0
19	Yamanashi	2	Metallic ores	0	0	0	0	0	0	0	0	0	0	0	0	0	0	0	0	0	0	0	0	0	0	0	0	0	0	0	0	0	0	0	0	0	0	0	0	0	0	0	0	0	0	0	0	0	0
19	Yamanashi	3	Non-metallic ores	0	0	0.0699565	0	0	0	0	0	0	0	0.184283	0	0	0	0.622634	0	0.0108992	0	0	0.179756	0.044232	-0.135752	0.0726934	0	0.242672	17.4481	5.94013	0.170105	2.95077	0	0	0.113784	0	0.0108323	0.00659904	0.0506321	0.0974146	0	0	0.336063	0	0	0	0	0	0
19	Yamanashi	4	Coal mining, crude petroleum and natural gas	0	0	0	0	0	0	0	0	0	0	0	0	0	0	0	0	0	0	0	0	0	0	0	0	0	0	0	0	0	0	0	0	0	0	0	0	0	0	0	0	0	0	0	0	0	0
19	Yamanashi	5	Food and Tobacco	5.74166	0	0	0	1307.29	36.2565	0	1.13173	0.00904262	0	0.0519502	0	0	0	0.0109702	0	0.00787338	0	0	5.83717	1.26212	0	0	0.0156151	0	0	0	0	0.0429176	0	0	0	0	0	0	0	0	0	0	0	0	0	0	0	0	0
19	Yamanashi	6	Beverage	1.60396	0	0	0	5.43039	24.4389	0	0	0	0	0	0	0	0	0	0	0.0179492	0	0	0	0.0182107	0	0	0	0	0	0	0	0	0	0	0	0	0	0	0	0	0	0	0	0	0	0	0	0	0
19	Yamanashi	7	Textile products	2.07948	0	0	0	0	0.0394134	18.7193	279.239	0	4.61544	0.334776	2.13848	3.67752	0	0	0	0	0	0	0.0335555	0	0	0	1.27107	19.3898	0.0848915	0	0	0.504615	0	0	0	0	0	0.103476	0.0496209	0.277728	0.168318	3.53497	0	0	0	0	0.0187428	0.317711	0.497199
19	Yamanashi	8	Wearing aparel and other textile products	6.29899	0	0.0195248	0	17.0078	0.400473	1.56096	7.79659	0.43397	1.30269	0.139247	3.19311	2.4324	0	0.100815	0	0.032158	0	0	1.96994	0.375204	0	0.750683	0.462391	0.989766	0.260139	1.13073	0	0.584308	0	1.25614	0.125894	0.395759	0.0159803	0.184969	0.429494	1.58081	2.39118	1.40157	1.91699	1.32957	4.15242	2.29333	0.324457	0.0978245	6.08105
19	Yamanashi	9	Timber and wooden products	0.28538	0	0	0	1.37763	0.0599902	0	0.0986378	11.2362	22.5344	2.71203	8.75419	0.127215	0	0	0	0	0	0	0.134069	0	0	0	0.145099	0.00532336	0.228427	0.0102082	0.0281935	0.114471	0	0	0.0990083	0	0	0.21656	0.264343	0.574639	0.128096	0.150125	0.0501297	0.636051	0.133087	0.149071	0.0392259	0.00549523	0.170274
19	Yamanashi	10	Furniture and fixtures	0.0099226	0	0	0	0.827477	0.0286804	0.00938346	0.165413	0.00714164	5.52682	0.0102573	0.250989	0.443307	0	0.012996	0	0.0124364	0	0	0.346731	0.0504703	0	0	0.271313	0.0773685	0.00882484	0.0858951	0.00269578	0.0508429	0	0.102271	0.0216386	0	0	0.0112946	0.0144433	0.070734	0.0918612	0.202112	0.070301	0.0774038	0.121507	0.190049	0.021822	0.0126105	1.16862
19	Yamanashi	11	Pulp, paper, paperboard, building paper	0.00341865	0	0	0	0.190061	0.00395252	0.0280184	0.0079986	0.056592	0.42882	5.08535	15.6068	15.1579	0	0.0477603	0	0	0.00602566	0	0.464379	0.00434715	0	0	0.140214	0.0392824	0.0194588	0	0	0.0622826	0	0.0176177	0	0.0137559	0	0.0077827	0	0.00348144	0.00421988	0	0.0132114	0	0.287383	0.0043652	0.00375919	0.00289648	0.124652
19	Yamanashi	12	Paper products	1.37582	0	0	0	45.9677	4.24971	0.0733601	0.544507	0.0147795	2.03744	0	1.64828	2.13317	0.00856185	0.113556	0	0.0171579	0	0	28.3382	1.29689	0	0	0.774156	0.207865	0.550319	0.323196	0.04835	0.0818364	0	0	0	0.0275422	0	0.00519421	0	0.676148	0.219677	0.0190121	0.193982	0.236464	0.330743	0.340862	0.1129	0.0521943	1.17802
19	Yamanashi	13	Publishing, printing	0.0456765	0	0.00110344	0	32.2816	0.668922	0.0287965	1.43383	0.032875	0.944805	0.00262317	10.7424	431.942	0	0.0841971	0	0	0	0	10.8655	0.200061	0.00377269	0.00848495	0.0946159	0.154123	0.30332	0.0639029	0	0.0520099	0	0.183081	0.0719395	0.0136143	0.00316094	0.0500667	0.103423	1.14738	0.996078	0.888089	0.405336	3.07672	0.396402	1.0239	0.0390651	0.146199	5.74775
19	Yamanashi	14	Chemical fertilizer	0	0	0	0	0	0	0	0	0	0	0	0	0	0	0	0	0	0	0	0	0	0	0	0	0	0	0	0	0	0	0	0	0	0	0	0	0	0	0	0	0	0	0	0	0	0
19	Yamanashi	15	Basic inorganic chemical products	0	0	0	0	6.38818	0.191893	0.317399	0.00323606	0	0.0275383	0.0829261	0.223907	0.0241142	0.0553618	4.91283	0	0.565125	0.00975142	0	22.2839	3.36979	0	0	1.22394	4.30014	1.07461	0.174152	0	0.0157489	0	1.69641	0.0180972	0.00742046	0.00689149	0.00839658	0.185219	0.15212	0.116095	0.117812	0.156788	0.0678187	0.172115	0.346149	0.149047	0	0.447833
19	Yamanashi	16	Basic organic chemical products	0	0	0	0	0	0	0	0	0	0	0	0	0	0	0	0	0	0	0	0	0	0	0	0	0	0	0	0	0	0	0	0	0	0	0	0	0	0	0	0	0	0	0	0	0	0
19	Yamanashi	17	Organic chemical products	0.00642998	0	0	0	0.060374	0.0107051	0.0190255	0.000100295	0.000555346	0.000512094	0.00248149	0.00104092	0.00709999	0	0.00898302	0	0.099179	0.00642226	0	0.805074	0.169469	0	0.000286667	0.112308	0.145658	0.00131147	0	0	0.000488102	0	0	0	0	5.33966e-05	0.000975875	0.000124792	0.000873079	0.00391558	7.93766e-05	0.000993949	0.01414	0.00192943	0.000437883	0.000235683	0.00145276	0.00156302
19	Yamanashi	18	Synthetic resins	0	0	0	0	0	0	0.000374205	0	0	0.00165452	0.00184073	0.00480444	0.00103485	0	0	0	0	0	0	0.330455	0	0	0	0.470216	0	0	0	0	0.000473101	0	0	0	0	0	0.000270252	0	0	0	0	0.000458762	0.0015875	0.0146153	0	0.000587416	0.000603476	0.0131587
19	Yamanashi	19	Synthetic fibers	0	0	0	0	0	0	0	0	0	0	0	0	0	0	0	0	0	0	0	0	0	0	0	0	0	0	0	0	0	0	0	0	0	0	0	0	0	0	0	0	0	0	0	0	0	0
19	Yamanashi	20	Final chemical products	0.892116	0	0.0318449	0	6.37765	0.354074	0.528851	0.732106	1.30334	2.94272	0.832737	13.6877	236.47	0	2.39501	0	0.442244	0	0	116.215	7.71233	0.0989799	0.779137	4.51785	1.59557	0.0947367	0.649664	0	1.03856	0	0.308784	0.116148	0.0357182	0	0.131354	0.310103	1.97972	0.821793	0.764332	0.583175	6.08373	1.01356	0.858594	0.461208	0.0225628	2.41781
19	Yamanashi	21	Medicaments	5.32899	0	0	0	0.30797	0	0	0.00421224	0	0	0	0	0	0	0	0	0	0	0	1.44605	8.65815	0	0	0	0	0	0	0	0	0	0	0	0	0	0	0	0	0	0	0	0	0	0	0	0	0
19	Yamanashi	22	Petroleum refinery products	0.00140521	0	1.30286e-06	0	0.00355358	3.11767e-05	0.000115224	1.92779e-05	1.07823e-05	5.96552e-05	4.02641e-05	0.000115197	0.00356849	3.74776e-06	0.000295624	0	0.00015772	0	0	0.00079629	2.85746e-05	0.000293997	0.00112707	4.09622e-05	0.000105743	0.000287789	0.000136756	1.30241e-05	0.000139877	0	0.000856953	1.96017e-05	0	1.30627e-05	3.41047e-05	9.59469e-05	0.000314276	0.000144238	4.99327e-05	3.47363e-05	1.33557e-05	5.15638e-05	4.59092e-05	8.89553e-05	0	6.55489e-05
19	Yamanashi	23	Coal products	0	0	0	0	0	0	0	0	0	0	0	0	0	0	0	0	0	0	0	0	0	0	0	0	0	0	0	0	0	0	0	0	0	0	0	0	0	0	0	0	0	0	0	0	0	0
19	Yamanashi	24	Plastic products	3.26992	0	0	0	66.7473	8.13297	0.121265	3.40742	0.514204	8.39804	0.610709	28.4695	252.893	0.034371	0.74378	0	0.0172199	0	0	37.6502	5.97498	0	0	185.136	12.9454	0.498542	0.129745	0	0.219018	0	0	0	0	0.0171141	2.06433	0.879938	1.70696	2.0351	17.7578	2.26539	14.8515	10.331	7.14009	9.62363	0.628592	58.2118
19	Yamanashi	25	Rubber products	3.10445	0	0.00671612	0	2.77418	0.053571	0.0486861	0.749836	0.033349	0.461275	0.0319319	0.625084	3.38283	0	0.013486	0	0.0290369	0	0	0.395277	0.166939	0	0.0516437	0.38392	13.0189	0	0.899437	0	0.369318	0	1.31331	0.0168408	0.0207158	0	0.0117204	0.899267	0.644878	7.64502	6.89255	1.23354	9.05344	3.72129	3.27376	0.704818	0.157031	8.39113
19	Yamanashi	26	Glass and glass products	0.0568879	0	0	0	14.6782	41.1074	0	0	0	18.7455	0	0	0.185967	0	0.546394	0	0	0	0	54.2044	6.65516	0	0	5.79771	0.280147	6.61773	0.0895365	0	0.842085	0	0	0	0	0	0	0.414028	0.695194	0.772428	0.10534	0	3.93053	0.22593	7.66341	3.65945	0.192795	1.9913
19	Yamanashi	27	Cement and cement products	0	0	0	0	0	0	0	0	0	0	0	0	0	0	0	0	0	0	0	0	0	0	0	0	0	0	7.38543	0	0.00448995	0	0	0	0	0	0	0	0	0	0	0	0	0	0	0	0	0
19	Yamanashi	28	Pottery, china and earthenware	0	0	0	0	0.0644912	0	0	0	0	0.061415	0	0	0	0	0.00179555	0	0	0	0	0.00202415	0	0	0	0.00255579	0	0	0.00323656	0.00558679	0	0	0	0	0	0	0	0	0.00418831	0.00253834	0	0	0	0.0789467	0.0052515	0.00113061	0	0.0719814
19	Yamanashi	29	Other ceramic, stone and clay products	0.0792494	0	0	0	0.301258	0	0	0	0	0.131491	0.0227562	0	0.0287853	0	0.676596	0	0	0	0	0.112677	0.0671824	0	0.824404	0.10944	0.0289087	0.325783	23.2693	0.0526302	2.85753	0	0.340338	0.268834	0	0.00548427	0.0601382	0.192258	0.699444	5.74983	0.856025	0.680578	0.0588767	0.670277	0.269845	0.261431	0.00746052	0.455919
19	Yamanashi	30	Pig iron and crude steel	0	0	0	0	0	0	0	0	0	0	0	0	0	0	0	0	0	0	0	0	0	0	0	0	0	0	0	0	0	0	0	0	0	0	0	0	0	0	0	0	0	0	0	0	0	0
19	Yamanashi	31	steel products	0	0	0	0	0	0	0	0	0	0	0	0	0	0	0	0	0	0	0	0	0	0	0	0	0	0	0	0	0	0	0	0	0	0	0	0	0	0	0	0	0	0	0	0	0	0
19	Yamanashi	32	Cast and forged steel products	0	0	0	0	0	0	0	0	0	0.0538201	0	0	0	0	0	0	0	0	0	0	0	0	0	0	0	0	0	0	0.00307792	0	0	0	0	0	0.0041025	0.613803	0.473476	5.67897	2.88311	3.02244	0.747059	1.12364	0.224351	0.0386409	0.00458047	0.0630797
19	Yamanashi	33	Other iron or steel products	0	0	0	0	0	0	0	0	0	0.354085	0	0	0	0	0.000346612	0	0	0	0	0.000586112	0	0	0	0.00049337	0	0	0.00656024	0	0.00226002	0	0	0.00562687	0	0	0.000753086	0.569727	1.10301	0.432425	0.290717	0.0542037	0.0816179	0.111146	0.00126718	0.0270633	0.0126124	0.158203
19	Yamanashi	34	Non-ferrous metals	0	0	0	0	0	0	0	0	0	0.154281	0.00267004	0	-1.90263	0	2.94993	0	0.0776948	0	0	8.36462	0	0	0	0.160511	-0.00423991	0.257283	0	0.0140346	0.244108	0	25.2108	0.0732247	-0.0554299	4.70707	33.3012	-0.278216	5.21865	-0.38897	0.655248	0.399269	-0.120893	1.70284	0.260548	20.2962	0.0087536	0.806177
19	Yamanashi	35	Non-ferrous metal products	0	0	0	0	3.25265	0.173556	0	0	0.0432167	7.86058	0	0.243013	3.17334	0	0.131073	0	0	0	0	0.85701	0.0572652	0	0	2.31347	1.5524	0.0534024	0	0	0.222206	0	0	0	0	0.205687	23.0788	12.8043	22.7777	29.4249	16.9282	15.5471	8.39773	33.2466	26.8539	50.1967	0.915729	123.57
19	Yamanashi	36	Metal products for construction and architecture	0.00817103	0	0	0	0	0	0	0	0	0.0813442	0	0	0	0	0	0	0	0	0	0	0	0	0	0	0	0	0	0	0	0	0	0	0	0	0	1.36777	0.208028	0.0504304	0	0.0421027	0	0	0	0	0	0.0178761
19	Yamanashi	37	Other metal products	0.381433	0	0.00614306	0	15.3053	9.04867	0	2.20631	1.89121	16.4407	0.0949236	0.971972	1.90885	0	0.629098	0	0.123943	0	0	12.8072	1.28443	0.0420064	0.212567	0.983253	6.58595	0.43221	0.867161	0	2.22791	0	0	0.431307	0.0189482	0	0.321611	25.2519	57.8631	30.7435	22.4317	11.3739	18.7502	9.82789	7.20645	1.4214	0.514682	14.0419
19	Yamanashi	38	General industrial machinery	0	0	0	0	0	0	0	0	0	0.169257	0	0	0	0	0	0	0	0	0	0	0	0	0	3.30412	0	0.0109971	0.0243268	0	0.202393	0	0	0.117971	0.165847	0	0.0234579	0.0899922	0.676828	297.419	39.568	8.42207	10.8858	3.24315	3.06892	0.0509878	0.196432	0.597388
19	Yamanashi	39	Special industrial machinery	0	0	0	0	0	0	0	0	0	0	0	0	0	0	0	0	0	0	0	0	0	0	0	0	0	0	0	0	0	0	0	0	0	0	0	0	0	2.96212	1217.72	0	0.167138	0	0.095754	0.742146	0	0
19	Yamanashi	40	Other general machines	0	0	0	0	0	0	0	0	0	2.30808	0	0	0	0	0	0	0	0	0	0.140872	0	0	0	0.39132	0	0.0203652	0	0	0.114072	0	0	0.156049	0	0	0.0434411	0.291645	0.874466	55.1525	40.2283	111.315	4.43374	5.00176	3.47208	0.314743	0.242511	3.02663
19	Yamanashi	41	Machinery for office and service industry	0	0	0	0	0	0	0	0	0	0	0	0	0	0	0	0	0	0	0	0	0	0	0	0	0	0	0	0	0	0	0	0	0	0	0	0	0	0	0	0	43.0271	0	0	0	0	0
19	Yamanashi	42	Industrial electric equipment	0.632028	0	0	0	0	0	0	0	0	0.111035	0	0	0	0	0	0	0	0	0	0	0	0	0	0	0	0	0	0	0	0	0	0	0	0	0	0	0	41.7154	51.3915	0.431026	37.6194	181.957	58.6042	9.01438	1.32298	39.7734
19	Yamanashi	43	Applied electric equipment and electric mesuring instruments	0	0	0	0	0	0	0	0	0	0	0	0	0	0	0	0	0	0	0	0	0	0	0	0	0	0	0	0	0	0	0	0	0	0	0	0	0	23.1199	96.8891	6.41926	17.0429	129.778	890.6	0	0	22.1801
19	Yamanashi	44	Other electric equipment	0.0577869	0	0.001047	0	0	0	0	0	0	0.043146	0	0	0	0	0	0	0	0	0	0.0284406	0	0	0	0	0	0	0	0	0	0	0	0	0	0	0	0	0.0882726	0.279378	0.802536	0.167489	0.703005	1.79138	1.06684	6.53171	0.0612005	7.01297
19	Yamanashi	45	Household electric and electric applications	0	0	0	0	0	0	0	0	0	0	0	0	0	0	0	0	0	0	0	0	0	0	0	0	0	0	0	0	0	0	0	0	0	0	0	0	0	0	0	0	0	0	0	0	0.380517	0
19	Yamanashi	46	Communication equipment	0	0	0	0	0	0	0	0	0	0	0	0	0.0227248	0	0	0	0	0	0	0	0.00662971	0	0	0	0	0	0	0	0	0	0	0	0	0	0	0	0	0.128712	0.0241356	0	0	0.00345101	0.279604	0.00286651	0	4.83623
19	Yamanashi	47	Electric computing equipment and accessory equipment	0	0	0	0	0	0	0	0	0	0	0	0	0	0	0	0	0	0	0	0	0	0	0	0	0	0	0	0	0	0	0	0	0	0	0	0	0	0	20.1839	0	0	0	0	0	0	3.90784
19	Yamanashi	48	Semiconductor devices and integrated circuits	0	0	0	0	0	0	0	0	0	0	0	0	0	0	0	0	0	0	0	0	0	0	0	0	0	0	0	0	0	0	0	0	0	0	0	0	0.820674	2.98423	19.3992	5.26465	321.441	199.613	1319.8	9.9375	11.9487	1714.35
19	Yamanashi	49	Other electrical equipment	0	0	0	0	0	0	0	0	0	0	0	0.108703	5.26818	0	0	0	0	0	0	0	0	0	0	0	0	0	0	0	0	0	0	0	0	0	0.081528	0	0.21882	15.6488	32.8751	0.899578	133.376	93.6216	800.706	2.48091	4.50581	1046.3
19	Yamanashi	50	Passenger motor cars	0	0	0	0	0	0	0	0	0	0	0	0	0	0	0	0	0	0	0	0	0	0	0	0	0	0	0	0	0	0	0	0	0	0	0	0	0	0	0	0	0	0	0	0	0	0
19	Yamanashi	51	Other cars	0	0	0	0	0	0	0	0	0	0	0	0	0	0	0	0	0	0	0	0	0	0	0	0	0	0	0	0	0	0	0	0	0	0	0	0	0	0	0	0	0	0	0	0	0	0
19	Yamanashi	52	Motor vheicle parts and accessories	0	0	0	0	0	0	0	0	0	0	0	0	0	0	0	0	0	0	0	0	0	0	0	0	0	0	0	0	0	0	0	0	0	0	0	0	0	0	0.0528436	0	0	0	0	0	0	0
19	Yamanashi	53	Other transportation equipment	0.030146	0	0	0	0	0	0	0	0	0	0	0	0	0	0	0	0	0	0	0	0	0	0	0	0	0	0	0	0	0	0	0	0	0	0	0	0	0	0	0	0	0	0	0	0	0
19	Yamanashi	54	Precision instruments	4.49803	0	0	0	0	0	0.0378101	0.0350801	0.0431652	0	0.0619965	0.121362	0.130703	0	0	0	0	0	0	0.177101	0.0762626	0	0	0.670851	0	0	0	0	0	0	0	0	0	0	0.045511	0.0872974	0.122151	15.1761	41.7564	0.231769	13.0327	6.82798	11.372	0.0329739	0.0508132	13.6893
19	Yamanashi	55	Miscellaneous manufacturing products	2.08676	0	0.0252058	0	4.57228	0.714858	0.0730882	48.3267	0.639706	9.92543	0.0798943	0.703788	1.51593	0	0	0	0.121085	0	0	0.98899	0	0	0.323034	0.480288	0.285455	1.01731	0.364931	0.104988	2.55212	0	0	1.0534	0.0518314	0	0.469196	0.899994	0.629658	8.06143	2.54028	0.398238	0	0.409263	1.72702	0.106233	0.0327412	6.96069
19	Yamanashi	56	Reuse and recycling	0	0	0	0	0	3.62818	0	0	0	0	0.148491	0	0	0	0.135074	0	0	0	0	0	0	0	0	3.95517	0.0181383	0.220131	0.27826	0.012008	0.0125818	0	0.740269	3.27712	0.296411	2.1059	4.89687	0	0	0	0	0	0	0	0	0	0	0
19	Yamanashi	57	Building construction and repair of construction	0	0	0	0	0	0	0	0	0	0	0	0	0	0	0	0	0	0	0	0	0	0	0	0	0	0	0	0	0	0	0	0	0	0	0	0	0	0	0	0	0	0	0	0	0	0
19	Yamanashi	58	Public construction	0	0	0	0	0	0	0	0	0	0	0	0	0	0	0	0	0	0	0	0	0	0	0	0	0	0	0	0	0	0	0	0	0	0	0	0	0	0	0	0	0	0	0	0	0	0
19	Yamanashi	59	Other civil enginnering and construction	0	0	0	0	0	0	0	0	0	0	0	0	0	0	0	0	0	0	0	0	0	0	0	0	0	0	0	0	0	0	0	0	0	0	0	0	0	0	0	0	0	0	0	0	0	0
19	Yamanashi	60	Electricity	0	0	0	0	0	0	0	0	0	0	0	0	0	0	0	0	0	0	0	0	0	0	0	0	0	0	0	0	0	0	0	0	0	0	0	0	0	0	0	0	0	0	0	0	0	0
19	Yamanashi	61	Gas supply and heat supply	0	0	0	0	0	0	0	0	0	0	0	0	0	0	0	0	0	0	0	0	0	0	0	0	0	0	0	0	0	0	0	0	0	0	0	0	0	0	0	0	0	0	0	0	0	0
19	Yamanashi	62	Water supply and waste management services	0	0	0	0	0	0	0	0	0	0	0	0	0	0	0	0	0	0	0	0	0	0	0	0	0	0	0	0	0	0	0	0	0	0	0	0	0	0	0	0	0	0	0	0	0	0
19	Yamanashi	63	Commerce	16.6939	0	0.0427621	0	419.963	19.5146	1.68333	27.2895	4.64565	27.9873	4.60843	55.4301	216.972	0.0298201	2.90384	0	1.24747	0.0577775	0	66.1515	10.6708	0.283547	2.75013	33.7853	18.8037	1.7068	30.0739	0.0906759	3.41355	0	34.0468	2.95036	23.3182	0.716421	3.49154	15.2425	30.1531	54.8599	66.3827	17.9192	41.81	28.9485	60.4629	12.9337	1.63104	102.377
19	Yamanashi	64	Financial and insurance	1.82504	0	0.0107243	0	6.4881	0.672674	0.300367	3.52907	0.204938	2.36147	0.251468	4.15814	10.4614	0.00140223	0.182064	0	0.0358284	0.000987956	0	1.52167	0.360652	0.088333	0.0224904	1.28879	1.24213	0.27677	5.43788	0.0170555	0.353582	0	1.53094	0.174794	0.678121	0.325363	0.102083	0.967636	1.13363	3.42482	2.48684	2.60511	0.984424	1.4989	1.16303	0.162716	0.0560383	2.5678
19	Yamanashi	65	Real estate agencies and rental services	0	0	0	0	0	0	0	0	0	0	0	0	0	0	0	0	0	0	0	0	0	0	0	0	0	0	0	0	0	0	0	0	0	0	0	0	0	0	0	0	0	0	0	0	0	0
19	Yamanashi	66	House rent	0	0	0	0	0	0	0	0	0	0	0	0	0	0	0	0	0	0	0	0	0	0	0	0	0	0	0	0	0	0	0	0	0	0	0	0	0	0	0	0	0	0	0	0	0	0
19	Yamanashi	67	Transport	24.8707	0	0.670104	0	79.5744	8.00448	0.674962	4.91874	3.36244	7.10545	0.89544	11.2	82.3986	0	1.34274	0	0.280568	0	0	19.1862	4.91339	0.713856	0.292895	9.52404	3.3764	1.15415	78.5029	0.0352564	13.2176	0	22.5876	0.792392	3.87277	0.561732	1.32451	9.09526	14.4181	19.5267	15.3191	8.95183	9.46515	7.27983	16.7732	1.85508	0.280372	35.8054
19	Yamanashi	68	Communication	1.93064	0	0.0127796	0	2.21076	0.135915	0.0627108	1.33292	0.0130169	1.76895	0.0724454	1.98542	12.2481	0	0.102645	0	0.0141672	0	0	2.12736	5.52519	0.171413	0.181419	2.1073	2.15608	0.152805	0.362931	0	0.12356	0	0.780574	0.23171	0.0545794	0.233731	0.223019	1.64533	1.74048	6.08897	2.79218	1.82884	1.73329	2.4092	2.24292	0.295822	0.0459695	3.55441
19	Yamanashi	69	Broadcasting	0.0137198	0	0	0	0.195578	0.0158623	0	0.024075	0	0.0546331	0	0.0832889	0.448501	0	0	0	0	0	0	0.121542	0	0.0305962	0	0.136414	0.0450424	0.00488077	0.0431873	0	0	0	0.106055	0	0.0184018	0.01709	0	0.0199704	0.0558871	0.135482	0.0889177	0.0530201	0.0764461	0.0544879	0.0875923	0.00754321	0	0.130066
19	Yamanashi	70	Information services	0	0	0	0	0	0	0	0	0	0	0	0	0	0	0	0	0	0	0	0	0	0	0	0	0	0	0	0	0	0	0	0	0	0	0	0	0	0	0	0	0	0	0	0	0	0
19	Yamanashi	71	﻿Internet based services	0	0	0	0	0	0	0	0	0	0	0	0	0	0	0	0	0	0	0	0	0	0	0	0	0	0	0	0	0	0	0	0	0	0	0	0	0	0	0	0	0	0	0	0	0	0
19	Yamanashi	72	Image information production and distribution industry	0.0075045	0	0.000478236	0	0.0606826	0.00134634	0.00179458	0.0274726	0.00102438	0.0213822	0.000936263	0.0390121	0.173982	0	0.00271143	0	0.000405419	0	0	0.0369344	0.00806195	9.6182e-05	0.00129791	0.0181717	0.0259119	0.00280779	0.0553914	7.03044e-05	0.00397787	0	0.0136692	0.00126972	0.00225606	0.000483515	0.000785486	0.00960514	0.036367	0.0249152	0.0230006	0.0108338	0.0239354	0.0364843	0.0600548	0.0085366	0.00109625	0.0735976
19	Yamanashi	73	Public administration	0	0	0	0	0	0	0	0	0	0	0	0	0	0	0	0	0	0	0	0	0	0	0	0	0	0	0	0	0	0	0	0	0	0	0	0	0	0	0	0	0	0	0	0	0	0
19	Yamanashi	74	Education and Research	0.323308	0	0.0108144	0	22.1174	2.06205	0.201588	1.39028	0.0690418	5.17098	0.0844714	3.93982	1.4905	0.0355524	2.9719	0	0.890585	0.0375731	0	69.8871	53.8182	0.0264105	0.314811	37.3655	20.106	4.40727	8.7177	0.0984542	1.19948	0	7.50681	0.453247	0.0142959	1.75253	1.73357	3.42353	3.10795	31.2074	57.4267	4.67277	48.1249	57.2893	98.1233	19.4849	1.35157	141.489
19	Yamanashi	75	Medical service, health and social security and nursing care	0.130289	0	0.00447275	0	1.75954	0.332983	0.0129694	0.549507	0.0197417	0.266236	0.0354429	0.610556	0.739748	0	0.0658626	0	0.00859454	0	0	1.22847	0.876334	0.00509745	0.0458577	0.963061	0.776689	0.0536682	1.31672	0.00372599	0.0156162	0	0.335716	0.0598159	0.202343	0.0128127	0.0156109	0.189647	0.60056	2.23461	1.47294	1.40451	1.87987	0.517441	0.577892	0.060323	0.0116198	2.2503
19	Yamanashi	76	Advertising and survery	0	0	0	0	0	0	0	0	0	0	0	0	0	0	0	0	0	0	0	0	0	0	0	0	0	0	0	0	0	0	0	0	0	0	0	0	0	0	0	0	0	0	0	0	0	0
19	Yamanashi	77	Giids rental and leasing services	0.00460799	0	5.37783e-05	0	0.0397262	0.00195945	0.000623754	0.00210589	0.000619789	0.0093206	0.000582404	0.0125502	0.0627699	0	0.00116786	0	9.7596e-05	0	0	0.00720491	0.00107754	0.000197488	0.00292533	0.0218608	0.00858666	0.00109177	0.0178502	6.47105e-05	0.00138735	0	0.00625539	0.00121864	0.0020274	0.000239639	0.00112619	0.00496051	0.0169233	0.0582592	0.0447668	0.0250888	0.0201934	0.0427923	0.0333496	0.00618013	0.000488989	0.0795064
19	Yamanashi	78	Other business services	0.0246337	0	0.000376794	0	0.350865	0.0164109	0.00335576	0.0404509	0.00608809	0.0787867	0.00368958	0.137604	1.24051	5.16128e-05	0.01261	0	0.000982603	7.27285e-05	0	0.100321	0.0517347	0.00184037	0.00579472	0.223698	0.12368	0.0221946	0.192622	0.000201784	0.0117224	0	0.0363619	0.0169617	0.00531299	0.00801816	0.00757748	0.0466676	0.0832423	0.239437	0.183871	0.0643683	0.121256	0.140713	0.311513	0.0393381	0.00524398	0.266873
19	Yamanashi	79	Personal services	7.98591	0	0	0	3.46801	0.122292	0	0.572294	0.0570968	0.526499	0	0.856165	6.42567	0	0.0461786	0	0	0	0	1.1713	0.353067	0	0	1.38035	0.47748	0.0470359	0.99887	0	0.015055	0	0.613233	0.0576661	0.212805	0	0.0401331	0.269436	0.754016	1.33828	1.10173	0.510954	0.766179	1.64531	1.04672	0.334392	0	2.15979
19	Yamanashi	80	Activities not elsewhere classified	38.5126	0	0.106991	0	163.853	10.3307	0.99602	21.8907	22.0894	8.40543	5.1672	106.287	262.916	0	1.80915	0	0.811525	0.0228251	0	8.3619	11.3128	0.346549	3.63723	38.5309	13.2645	1.77824	186.045	0.35182	6.16355	0	28.2292	9.57338	27.5473	2.45189	2.43707	6.22037	37.954	132.322	73.5684	30.7941	40.667	17.3662	26.225	12.6876	0.61442	40.7019
[truncated: 2,244 more rows]
[truncated: 434 more columns]
