# Supplementary material for: Carbon footprint analysis through constructing a multi-region input–output table: a case study of Japan
Source: Springer Nature journal article supplement (doi:10.1186/s40008-015-0015-6), 2015-06-17
Supplement: MOESM8 [file 11901238]

## Sheet: MRIO_Japan (Kumamoto-Okinawa)
2005 MRIO of Japan (47 regions)				43	43	43	43	43	43	43	43	43	43	43	43	43	43	43	43	43	43	43	43	43	43	43	43	43	43	43	43	43	43	43	43	43	43	43	43	43	43	43	43	43	43	43	43	43	43
Part 8				Kumamoto	Kumamoto	Kumamoto	Kumamoto	Kumamoto	Kumamoto	Kumamoto	Kumamoto	Kumamoto	Kumamoto	Kumamoto	Kumamoto	Kumamoto	Kumamoto	Kumamoto	Kumamoto	Kumamoto	Kumamoto	Kumamoto	Kumamoto	Kumamoto	Kumamoto	Kumamoto	Kumamoto	Kumamoto	Kumamoto	Kumamoto	Kumamoto	Kumamoto	Kumamoto	Kumamoto	Kumamoto	Kumamoto	Kumamoto	Kumamoto	Kumamoto	Kumamoto	Kumamoto	Kumamoto	Kumamoto	Kumamoto	Kumamoto	Kumamoto	Kumamoto	Kumamoto	Kumamoto
				1	2	3	4	5	6	7	8	9	10	11	12	13	14	15	16	17	18	19	20	21	22	23	24	25	26	27	28	29	30	31	32	33	34	35	36	37	38	39	40	41	42	43	44	45	46
			Million yen	Agriculture, forestry and fishery	Metallic ores	Non-metallic ores	Coal mining, crude petroleum and natural gas	Food and Tobacco	Beverage	Textile products	Wearing aparel and other textile products	Timber and wooden products	Furniture and fixtures	Pulp, paper, paperboard, building paper	Paper products	Publishing, printing	Chemical fertilizer	Basic inorganic chemical products	Basic organic chemical products	Organic chemical products	Synthetic resins	Synthetic fibers	Final chemical products	Medicaments	Petroleum refinery products	Coal products	Plastic products	Rubber products	Glass and glass products	Cement and cement products	Pottery, china and earthenware	Other ceramic, stone and clay products	Pig iron and crude steel	steel products	Cast and forged steel products	Other iron or steel products	Non-ferrous metals	Non-ferrous metal products	Metal products for construction and architecture	Other metal products	General industrial machinery	Special industrial machinery	Other general machines	Machinery for office and service industry	Industrial electric equipment	Applied electric equipment and electric mesuring instruments	Other electric equipment	Household electric and electric applications	Communication equipment
1	Hokkaido	1	Agriculture, forestry and fishery	1086.53	0	0.019792	0	2237.71	49.7545	8.02586	0.0647897	240.873	0	2.44239	0	0	0.105089	0.143184	0	0.269439	0	0	0.311115	2.66597	0	0.251542	0	31.1362	0	0	0	0.0206945	0	0	0	0	0	0	0	0	0	0	0	0	0	0	0	0	0
1	Hokkaido	2	Metallic ores	0	0	0	0	0	0	0	0	0	0	0	0	0	0.00025967	0.0170584	0	0	0.000230958	0	0	0	0	0	0	0	0	0	0.000119121	0	0	0	0	0	0.0372995	0	0	0	0	0	0	0	0	0	0	0	0
1	Hokkaido	3	Non-metallic ores	0.0935301	0	0.0284332	0	0	0	0	0	0	0	0.742589	0	0	0.366643	0.348428	0	0.0276483	0	0	0.01277	0.0192653	-0.0177925	2.62811	0	0.0495079	1.39244	15.5357	0.368048	2.98147	0	0	0.0195073	0	0.0806316	0.0129712	0.0276508	0.00817524	0	0	0.00922714	0	0	0	0	0	0
1	Hokkaido	4	Coal mining, crude petroleum and natural gas	0	0	0	0	0.000118314	0	0	0	0	0	0.082849	0	0	0.053124	0.00012165	0	0.0102822	0.000333529	0	0.000246704	0.000111656	0.279457	0	0	0	0.00529608	0.0012808	0.00194961	0.00812297	0	0.0101942	0	0	0.000368936	0	0.000228938	0	0	0.000559309	0	0	0.000419099	0	0	0	0
1	Hokkaido	5	Food and Tobacco	1102.48	0	0	0	1649.57	130.762	-0.0261901	1.16261	0.119765	0	10.2505	0.0242344	0	0.0962939	0.0624768	0	0.582934	0	0	1.74215	14.7374	0	0	0.132448	0	0	0	0.0588986	0.505669	0	0	0	0	0	0	0	0	0	0	0	0	0	0	0	0	0
1	Hokkaido	6	Beverage	0.83374	0	0	0	1.22724	12.9157	0	0	0	0	0	0	0	0	0	0	0	0	0	0	0.0301261	0	0	0	0	0	0	0	0	0	0	0	0	0	0	0	0	0	0	0	0	0	0	0	0	0
1	Hokkaido	7	Textile products	0.041009	0	0	0	0.000352913	0.00056319	0.18365	0.741333	0.00127525	0.00898482	0.0205403	0.000281506	0.00357703	0.00161568	0	0	0	0	0	0	0	0	0	0.00400013	0.13042	0.000125376	0	0	0.000856601	0	0	0	0	0	0.00186869	0.00227629	0.000942211	0.000667343	0.0751862	0	0	0	0	0	0.000880594	0.000104522
1	Hokkaido	8	Wearing aparel and other textile products	6.26103	0	0.465652	0	2.51207	0.476523	0.035751	1.70763	0.23939	0.116028	0.441814	0.236296	0.13648	0.150225	0.0121835	0	0.0267475	0	0	0.160601	0.318704	0	0.408615	0.0929824	0.251448	0.101031	0.211654	0.0516858	0.240361	0	0.0597376	0.0622767	0.0130044	0.0246331	0.163132	0.475767	0.260994	0.324896	0.576963	0.0736438	0	1.13853	0.201695	0.058729	0.0110875	0.210566
1	Hokkaido	9	Timber and wooden products	17.1997	0	0.303178	0	4.08858	0.632207	0	0.289468	101.583	36.0565	136.419	0.202566	0.070199	0.0268295	0	0	0.0573239	0	0	0.132381	0	0	0	0.531399	0.131973	0.920226	0.164947	1.4277	0.871756	0	0	0.31547	0	0	1.47914	5.40531	1.55092	0.072031	0.19208	0.0573925	0	0.337333	0.0648393	0	0	0.0451273
1	Hokkaido	10	Furniture and fixtures	0.252451	0	0.340419	0	1.57146	0.412572	0	0.412731	0.162361	4.69074	0.472526	0.0808708	0.303611	0.0401669	0.0390913	0	0.114427	0.023817	0	0.528508	0.873074	0	0.0145673	0.784517	0.87813	0	0.205788	0.135125	0.210929	0	0.0929312	0.0605507	0	0.0263454	0.308681	0.282007	0.177632	0.299552	1.78531	0.0286411	0	0.527472	0.269644	0.0628114	0.0237165	0.495446
1	Hokkaido	11	Pulp, paper, paperboard, building paper	2.38721	0	0	0	4.97791	1.23572	0.953585	0.570417	7.81283	7.22124	695.375	263.213	280.814	0	-0.0379132	0	0	1.17806	0	23.6043	2.71428	0	0	7.71591	10.6032	5.46257	0	1.21522	0.115072	0	0	0	0.0404678	0	0.663838	0.5708	0.443003	0.0697259	0.069725	0.250002	0	2.80822	0.125529	0.0731022	0.0690053	0.753535
1	Hokkaido	12	Paper products	9.2988	0	0	0	6.02473	2.80226	0.0347006	0.176012	0.0191007	0.148908	0.221002	0.0107031	0.115396	0.0693053	0.00919765	0	0.0235578	0.00420287	0	1.17667	1.35776	0	0.00171374	0.237882	0.154959	0.290783	0.00161397	0.166192	0.100808	0	0	0	0.027816	0	0.00315776	0.00432734	0.217928	0.00986729	0.00704797	0.0151625	0	0.194082	0.0380662	0.00738935	0.00976531	0.0238442
1	Hokkaido	13	Publishing, printing	0.0335363	0	0.0062322	0	3.67871	0.264665	0.0249752	0.15556	0.0270089	0.0498384	0.0192268	0.0474697	3.75043	0.00909998	0.0104665	0	0.00441887	0.00294319	0	0.451458	0.152229	0	0.00360031	0.0238953	0.0956288	0.0767784	0.0135628	0.00531304	0.00733093	0	0.00717748	0.0127203	0.000859367	0.00406954	0.0597056	0.0871227	0.112106	0.104388	0.181382	0.0194663	0.00074561	0.0783575	0.0493155	0.000776193	0.0102577	0.0535717
1	Hokkaido	14	Chemical fertilizer	344.872	0	0	0	0	0.0434518	0	0	0	0	0	0	0	58.9232	2.65963	0	9.06568	0.0426427	0	0.85163	1.67024	0	0	0	0.196529	0	0	0	0.14162	0	0	0	0	0	0	0	0	0	0	0	0	0	0	0.0449838	0	0
1	Hokkaido	15	Basic inorganic chemical products	0.308397	0	0.00204003	0	2.44219	0.310216	0.0441909	0.121876	0	0.00602362	2.16688	0.0212634	0.00188943	1.21967	1.44001	0	1.17568	0.0828538	0	3.89945	2.18285	0	0.00707109	0.532779	3.08855	0.856689	0.0288575	0.0795044	0.0405281	0	0.0375914	0.0117568	0.00225043	0.136408	0.0651463	0.438442	0.0677476	0.0853045	0.219075	0.0278053	0	0.118032	0.0174517	0.0345545	0.0019187	0.0546578
1	Hokkaido	16	Basic organic chemical products	0	0	0	0	0.0192646	0	0	0	0	0	0.0525583	0	0.195261	2.1574	0	0	168.16	1.90075	0	2.97256	0.34543	0	0	0.0167966	0.433831	0.246382	0	0	0.0400797	0	0	0.0184089	0	0	0	0	0	0.0910712	0	0	0	0	0	0	0	0
1	Hokkaido	17	Organic chemical products	0.000233189	0	4.65846e-05	0	0.0402691	0.0397682	0.00149348	7.62481e-05	0.000507601	0.000641903	0.0228243	0.000224101	0.00146695	0.00178091	0.00722173	0	0.287389	0.0882632	0	0.10657	0.115467	0	0.000538233	0.0729151	0.437726	0.000798476	0.000152069	4.53875e-05	0.0267411	0	0	0	0	0	0.00163639	0.000181211	0.000328158	4.42715e-05	0.000398438	0.000105823	0	0.00136838	0.000318811	9.28304e-05	0.000175256	0.000166416
1	Hokkaido	18	Synthetic resins	0	0	0	0	0	0	0.00153782	0	8.37178e-05	0.00224591	0.00316741	0.000609851	0.0028179	0	0	0	0	0	0	0.0498631	0	0	0	0.759999	0.00198661	0	0	0	0.0024743	0	0	0	0	0	0.00665722	0.000246566	0.000680398	0	0	0.00067195	0	0.0248253	0	0.00159993	0.000635902	0.00135861
1	Hokkaido	19	Synthetic fibers	0	0	0	0	0	0	0	0	0	0	0	0	0	0	0	0	0	0	0	0	0	0	0	0	0	0	0	0	0	0	0	0	0	0	0	0	0	0	0	0	0	0	0	0	0	0
1	Hokkaido	20	Final chemical products	24.9236	0	0.315267	0	1.45219	0.485477	0.211411	0.143588	2.65588	0.72043	1.14522	1.49905	5.9008	0.098982	0.0566655	0	0.307897	0.0828586	0	5.65101	1.55511	0.0120086	0.73168	1.05232	1.78765	0.0646106	0.429557	0.00801302	0.495898	0	0.0252582	0.0684626	0.00302419	0	0.151745	1.28502	0.995936	0.403827	1.90187	0.062276	0.00262387	0.580776	0.143058	0.174815	0.00515681	0.119969
1	Hokkaido	21	Medicaments	7.74755	0	0	0	0.68383	0	0	0.00434974	0	0	0	0	0	0	0	0	0	0	0	0.178237	12.2415	0	0	0	0	0	0	0	0	0	0	0	0	0	0	0	0	0	0	0	0	0	0	0	0	0
1	Hokkaido	22	Petroleum refinery products	331.554	0	9.14134	0	78.2065	25.3894	2.78492	3.89428	14.0996	0.903833	101.799	4.88619	11.2887	13.9628	5.82381	0	7.95545	9.2649	0	2.09965	7.91906	5.30242	71.1837	6.80413	12.4646	9.0774	11.037	1.09805	21.2549	0	5.92253	3.32769	1.70371	4.97158	3.19911	9.78284	5.37674	6.74368	9.00467	1.13785	0	1.56051	0.285665	1.49722	0	0.26095
1	Hokkaido	23	Coal products	0	0	0	0	0	0	0	0	0	0	0	0	0	0	0	0	0	0	0	0	0	0	0	0	0	0	0	0	0	0	0	0	0	0	0	0	0	0	0	0	0	0	0	0	0	0
1	Hokkaido	24	Plastic products	7.35922	0	0	0	9.30411	5.51387	0.0495528	0.344332	0.354063	0.589008	0.436879	0.12937	5.79611	0.184361	0.065437	0	0.050976	0.00578738	0	2.09117	3.09605	0	0	31.0883	11.0798	0.216615	0.0177796	0.00994988	0.0427119	0	0	0	0	0.0128035	0.343512	0.558139	0.244593	0.219338	11.7956	0.0742358	0.00586457	2.99796	0.17123	2.0676	0.0864444	0.684035
1	Hokkaido	25	Rubber products	0.819775	0	0.132352	0	0.081867	0.0111982	0.0126022	0.157116	0.0216107	0.0372188	0.0226011	0.0221562	0.125276	0.0216229	0.00300627	0	0.0527995	0.00274743	0	0.0442007	0.165558	0	0.0252063	0.0904987	12.2608	0	0.0174085	0	0.0714748	0	0.0897813	0.0405123	0.00160442	0	0.0185781	0.801965	0.0731818	1.28269	4.24054	0.0644264	0.00974426	0.657665	0.10949	0.176794	0.0205188	0.384481
1	Hokkaido	26	Glass and glass products	0.0261139	0	0	0	0.979915	4.67566	0	0.0133418	0	0.917808	0	0	0.00301981	0	0.0303275	0	0.00369893	0	0	0.485194	1.61139	0	0	0.848665	0.275345	0.56585	0.021287	0	0.0272735	0	0	0	0	0	0.211713	0.263176	0.0885917	0.0278876	0.0278872	0	0.00312066	0.0261204	0.0139462	0.00649733	0.00919979	0.00873577
1	Hokkaido	27	Cement and cement products	0.0180001	0	0	0	0	0	0	0	0	0	0	0	0	0	0	0	0	0	0	0	0	0	0.0138489	0	0	0	24.7745	0	0.0626648	0	0	0.0172695	0	0	0	0	0.0120623	0	0	0	0	0	0	0	0	0
1	Hokkaido	28	Pottery, china and earthenware	0	0	0	0	0.000599224	2.60798e-05	0	0	0	0.000586756	0	0	0	0	2.80055e-05	0	0	0	0	0	0	0	0	9.49924e-05	0	0	0.000147429	0.000871251	0	0	0	0	0	0	0	0	8.18087e-05	0.00010301	0.000103008	0	0	0.00301506	0	5.39987e-05	0	0.000532416
1	Hokkaido	29	Other ceramic, stone and clay products	0.185762	0	0	0	0.0248411	0	0	0	0.00155435	0.00579149	0.0505603	0	0.000363323	0.00166631	0.062435	0	0.00133509	0.00222309	0	0.00534421	0.0197221	0	0.054842	0.00859475	0.00922108	0.0571529	0.264648	0.0279008	0.127563	0	0.00361427	0.0444611	0	0.175415	0.0609654	0.104528	0.0536885	0.429472	0.163659	0.0196048	0	0.0502821	0.0154368	0.038304	0.00110686	0.00595583
1	Hokkaido	30	Pig iron and crude steel	0	0	0	0	0	0	0	0	0	0	0	0	0	0	0	0	0	0	0	0	0	0	0	0	0	0	0	0	0	0	183.871	4.82738	1.19647	0	0	-0.846787	-1.52193	-1.07431	-3.36807	-0.0173511	0	-0.258358	0	-0.0152207	-0.0143677	-0.027286
1	Hokkaido	31	steel products	0.561453	0	0.16357	0	0	0	0.0303706	0	0.046294	2.26539	0	0	0	0	0	0	0	0	0	0	0	0	0	1.04441	5.72669	0	7.34821	0	0.476438	0	63.8663	5.20707	28.9606	0	0.186552	128.983	71.792	49.7769	70.4061	4.61812	0.0223649	19.1253	0.909533	2.92192	0.296695	0.646936
1	Hokkaido	32	Cast and forged steel products	0.632578	0	0.0451326	0	0	0	0	0	0	0.266527	0	0	0	0	0	0	0	0	0	0	0	0	0	0	0	0	0.0982195	0.30781	0.188762	0	0	1.1271	0	0	0.864757	41.9156	6.58569	165.905	109.887	21.8891	0.0431968	31.1346	2.89569	1.12421	0.0424483	0.120922
1	Hokkaido	33	Other iron or steel products	0	0	0	0	0	0	0	0	0	0	0	0	0	0	0	0	0	0	0	0	0	0	0	0	0	0	0	0	0	0	0	0	0	0	0	0	0	0	0	0	0	0	0	0	0	0
1	Hokkaido	34	Non-ferrous metals	0	0	0	0	0	0	0.000411596	0	0	0.00116884	0	0	-0.00615937	0	0.0537572	0	0.00700564	0	0	0.117232	0	0	0	0.00291411	-0.000413555	0.0150119	0	0.00809929	0.010927	0	0.00218829	0.00433448	-0.000262007	0.59059	1.67369	-0.0210188	0.0975187	-0.000677155	0.0343087	0.00134885	0	0.0452428	0.002235	0.43141	0.000223386	0.00106059
1	Hokkaido	35	Non-ferrous metal products	0	0	0	0	1.52131	0.694378	0.00555686	0	0.0222346	0.306136	0	0.00257096	0.507848	0	0	0	0	0	0	0.0571259	0.179462	0	0	0.295071	0.399207	0.00343513	0	0.00937257	0.120701	0	0	0	0	0.0703537	2.12649	34.567	4.16594	9.46515	10.6931	0.844969	0.00613811	6.19947	1.0753	5.71893	0.123651	0.945042
1	Hokkaido	36	Metal products for construction and architecture	0.0308766	0	0	0	0	0	0	0	0.0043644	0.0607104	0	0	0	0	0	0	0	0	0	0	0	0	0	0	0	0	0.0479417	0	0	0	0	0	0	0	0.00937988	4.43464	0.168486	0.251229	0	0.0350303	0	0	0	0	0	0.00393486
1	Hokkaido	37	Other metal products	1.16787	0	1.03058	0	4.53165	11.727	0.00706836	0.247014	0.54949	1.32746	0.22619	0.0305225	0.0982199	0	0.177047	0	0.225192	0.0359564	0	1.25097	1.82106	0	0.0848268	0.28835	7.77433	0.122346	1.02375	0.140414	0.503245	0	0.00250531	0.138425	0	0.071024	0.318394	13.1584	5.54948	8.856	16.8667	0.685652	0.0364359	3.77829	0.860684	0.306153	0.0895117	0.456554
1	Hokkaido	38	General industrial machinery	0.0248451	0	0.0909948	0	0	0	0	0	0	0.0101773	0	0	0	0	0	0	0	0	0	0	0	0	0.00238942	0.5401	0	0	0	0.0141045	0.0562215	0	0	0.0218502	0.0045627	0.006482	0.0242152	0.0663682	0.0686786	42.1161	15.3455	0.187916	0.0138555	0.651656	0.164531	0.0103027	0.0311211	0.0240105
1	Hokkaido	39	Special industrial machinery	0	0	0	0	0	0	0	0	0	0	0	0	0	0	0	0	0	0	0	0	0	0	0	0	0	0	0	0	0	0	0	0	0	0	0	0	0	0.84136	132.325	0	0	0	0	0.0309509	0	0
1	Hokkaido	40	Other general machines	0	0	0.224792	0	0	0	0	0	0.0145222	0.322253	0	0	0	0	0	0	0	0	0	0.0051211	0	0	0	0.0942191	0	0	0	0.0857016	0.107302	0	0	0.0469376	0	0	0.124843	0.223358	0.157368	5.59154	14.9957	3.68553	0.00467717	1.73994	0.505835	0.0973802	0.0367691	0.130929
1	Hokkaido	41	Machinery for office and service industry	0	0	0	0	0	0	0	0	0	0	0	0	0	0	0	0	0	0	0	0	0	0	0	0	0	0	0	0	0	0	0	0	0	0	0	0	0	0	0	0	0.00169808	0	0	0	0	0
1	Hokkaido	42	Industrial electric equipment	0.0964985	0	0.00481942	0	0	0	0	0	0.004774	0.0094869	0	0	0	0	0	0	0	0	0	0	0	0	0	0.00422366	0	0	0	0	0	0	0	0	0	0	0	1.10609	0.0290997	23.5235	20.8713	0.0821099	0.0415143	51.1354	1.7151	0.633851	0.149582	0.632711
1	Hokkaido	43	Applied electric equipment and electric mesuring instruments	0	0	0	0	0	0	0	0	0	0	0	0	0	0	0	0	0	0	0	0	0	0	0	0	0	0	0	0	0	0	0	0	0	0	0	0	0	0.000592043	0.0118755	8.32456e-05	0	0.0115798	0.0147026	0	0	0
1	Hokkaido	44	Other electric equipment	0.123527	0	0.00616931	0	0.00620109	0	0	0	0	0.0425044	0	0	0	0	0	0	0	0	0	0.0646514	0	0	0	0.00540668	0	0	0	0	0	0	0	0	0	0	0.00656701	0	0.142793	1.92306	6.99445	0.0490506	0.0059047	3.218	0.865529	4.75154	0.0812335	0.523424
1	Hokkaido	45	Household electric and electric applications	0	0	0	0	0	0	0	0	0	0	0	0	0	0	0	0	0	0	0	0	0	0	0	0	0	0	0	0	0	0	0	0	0	0	0	0	0	0	0	0	0	0	0	0	0.036696	0
1	Hokkaido	46	Communication equipment	0.0221165	0	0	0	0	0.0106307	0	0	0	0	0	0	0.0102302	0	0	0	0	0	0	0	0.146688	0	0	0	0.0192326	0	0	0	0	0	0	0	0	0	0.0117577	0.0429667	0	0.115469	0.0524852	0	0	0.00983199	0.0188982	0	0	0.670799
1	Hokkaido	47	Electric computing equipment and accessory equipment	0	0	0	0	0	0	0	0	0	0	0	0	0	0	0	0	0	0	0	0	0	0	0	0	0	0	0	0	0	0	0	0	0	0	0	0	0	0	0.000809436	0	0	0	0	0	0	3.45762e-05
1	Hokkaido	48	Semiconductor devices and integrated circuits	0	0	0	0	0	0	0	0	0	0	0	0	0	0	0	0	0	0	0	0	0	0	0	0	0	0	0	0	0	0	0	0	0	0	0	0	0.0105736	0.0208028	0.374445	0.00596706	0.00754228	1.22051	1.62165	0.000872405	0.0535283	0.533307
1	Hokkaido	49	Other electrical equipment	0	0	0	0	0	0	0	0	0	0	0	0	1.06044	0	0	0	0	0	0	0	0.0118054	0	0	0	0	0	0	0	0	0	0	0	0	0	0.0397427	0.0121028	0.789021	2.11709	35.8008	0.070678	0.214406	25.2243	32.4717	0.0124	1.20562	16.2497
1	Hokkaido	50	Passenger motor cars	0	0	0	0	0	0	0	0	0	0	0	0	0	0	0	0	0	0	0	0	0	0	0	0	0	0	0	0	0	0	0	0	0	0	0	0	0	0	0	0	0	0	0	0	0	0
1	Hokkaido	51	Other cars	0	0	0	0	0	0	0	0	0	0	0	0	0	0	0	0	0	0	0	0	0	0	0	0	0	0	0	0	0	0	0	0	0	0	0	0	0	0	0	0	0	0	0	0	0	0
1	Hokkaido	52	Motor vheicle parts and accessories	0	0	0	0	0	0	0	0	0	0	0	0	0	0	0	0	0	0	0	0	0	0	0	0	0	0	0	0	0	0	0	0	0	0	0	0	0	0	0.00654563	0	0	0	0	0	0	0
1	Hokkaido	53	Other transportation equipment	2.97324	0	0.00328523	0	0	0	0	0	0	0	0	0	0	0	0	0	0	0	0	0	0	0	0	0	0	0	0	0	0	0	0	0	0	0	0	0	0	0	0	0	0	0	0	0	0	0
1	Hokkaido	54	Precision instruments	0.0591639	0	0	0	0.00174708	0	0	0	0	0	0.0127105	0.00278717	0	0	0	0	0	0	0	0.00182147	0.00494631	0	0	0.00913959	0.00302643	0	0	0.00169346	0.00181739	0	0	0	0	0	0	0.0050709	0	0.581443	2.26792	0	0	0.199583	0.0282512	0	0	0.0217322
1	Hokkaido	55	Miscellaneous manufacturing products	0.298014	0	0.0867794	0	0.0689697	0.0514712	0.000874328	0.736614	0.0419813	0.103288	0.0138357	0.00728136	0.00560742	0.00107156	0	0	0	0	0	0.00105745	0	0	0.0058293	0.0106119	0.00351396	0.0291865	0.00109798	0.0334265	0.00211015	0	0	0.0203534	0	0	0.0784102	0.026495	0.00304637	0.0335636	0.0920589	0.00114611	0	0.00898192	0.0172643	0.00100539	0	0.00720944
1	Hokkaido	56	Reuse and recycling	1.4077	0	0	0	1.93277	4.12921	0.0416529	0	0	0	26.6179	0	0	5.32183	0.596181	0	0.149972	0	0	0.0125942	0	0.0526428	0	18.8317	0.0313884	1.49344	2.21	0.88989	0.0628296	0	2.33632	5.03285	1.21968	13.6107	3.19816	0	0.0120941	0	0	0	0	0	0	0	0	0
1	Hokkaido	57	Building construction and repair of construction	0	0	0	0	0	0	0	0	0	0	0	0	0	0	0	0	0	0	0	0	0	0	0	0	0	0	0	0	0	0	0	0	0	0	0	0	0	0	0	0	0	0	0	0	0	0
1	Hokkaido	58	Public construction	0	0	0	0	0	0	0	0	0	0	0	0	0	0	0	0	0	0	0	0	0	0	0	0	0	0	0	0	0	0	0	0	0	0	0	0	0	0	0	0	0	0	0	0	0	0
1	Hokkaido	59	Other civil enginnering and construction	0	0	0	0	0	0	0	0	0	0	0	0	0	0	0	0	0	0	0	0	0	0	0	0	0	0	0	0	0	0	0	0	0	0	0	0	0	0	0	0	0	0	0	0	0	0
1	Hokkaido	60	Electricity	0.383195	0	0.0443951	0	0.431523	0.0748304	0.0456409	0.0408492	0.0822484	0.00980191	0.27343	0.0197214	0.101127	0.0326189	0.0488582	0	0.0899755	0.0198325	0	0.0369676	0.0793311	0.00473026	0.0156653	0.271088	0.077823	0.0223657	0.0330317	0.003624	0.0859387	0	0.15709	0.0701858	0.0100595	0.00689477	0.0310363	0.136872	0.0944241	0.0878023	0.217222	0.0257575	0.00011484	0.0651499	0.0118041	0.068622	0.00101565	0.00525076
1	Hokkaido	61	Gas supply and heat supply	0.000792603	0	0.000263899	0	0.232897	0.0540988	0.00297261	0.00172777	0.00130706	0.000779218	0.193224	0.00317381	0.00195534	0.0165343	0.00272738	0	0.00688582	0.0510974	0	0.0041483	0.049816	0	0.00121963	0.0411673	0.0326246	0.0316633	0.00287155	0.00257118	0.00579459	0	0.048142	0.0136877	0.000582232	0.000551432	0.00870826	0.0328496	0.0225736	0.0195621	0.0233237	0.00329716	0	0.016913	0.00180605	0.0157764	0	0.000235685
1	Hokkaido	62	Water supply and waste management services	0.00187934	0	0.000434332	0	0.00509824	0.00171457	0.000153087	9.63933e-05	0.000182305	3.62276e-05	0.00276569	6.49254e-05	0.000565903	0.000500319	0.000251068	0	0.00082679	0.000187733	0	0.00118804	0.000935735	0	5.10328e-05	0.000703219	0.000634489	9.46349e-05	0.00138578	3.5862e-05	0.000461835	0	0.000291648	0.000127275	8.12078e-05	4.61472e-05	0.000227248	0.00100226	0.000370411	0.000573676	0.00230866	0.000443155	0	0.000537323	5.66779e-05	0.000359405	6.92374e-06	3.94471e-05
1	Hokkaido	63	Commerce	84.1815	0	2.03295	0	127.819	21.3031	2.86182	11.2593	6.48136	4.34369	22.8514	0.698555	28.7493	1.36062	0.982838	0	3.62418	0.145221	0	11.4279	2.55503	0.12472	2.94757	27.5231	4.93287	1.6166	6.75401	0.294054	3.92381	0	2.28227	1.63541	3.69999	1.52903	4.55834	30.591	8.60737	33.2391	70.455	4.55991	0.114456	24.7157	4.52558	8.23272	0.439179	2.3852
1	Hokkaido	64	Financial and insurance	1.50256	0	0.269135	0	0.437887	0.247383	0.0745123	0.251036	0.065152	0.0472491	0.251889	0.00681905	0.348168	0.030507	0.0173843	0	0.0542463	0.00232065	0	0.185584	0.0360358	0.00413943	0.00720613	0.098222	0.0480465	0.040089	0.230333	0.00718156	0.060471	0	0.0316922	0.0168827	0.023768	0.0592387	0.03742	0.558197	0.0844474	0.214819	0.567575	0.105832	0.000542678	0.22375	0.0181084	0.0721236	0.00231086	0.0232934
1	Hokkaido	65	Real estate agencies and rental services	0.0292341	0	0.0339543	0	0.119111	0.0405216	0.00941459	0.0308443	0.00639053	0.0180463	0.0502807	0.00217789	0.142773	0.00468743	0.00386007	0	0.0119412	0.000962107	0	0.0309567	0.0244786	0	0.00666918	0.0794511	0.01951	0.00436492	0.0509861	0.00132327	0.0170413	0	0.0087594	0.00945784	0.00412017	0.00709495	0.0151801	0.169393	0.0345112	0.0813164	0.183927	0.0343237	0	0.0976222	0.0104568	0.0422886	0.000958047	0.0051551
1	Hokkaido	66	House rent	0	0	0	0	0	0	0	0	0	0	0	0	0	0	0	0	0	0	0	0	0	0	0	0	0	0	0	0	0	0	0	0	0	0	0	0	0	0	0	0	0	0	0	0	0	0
1	Hokkaido	67	Transport	167.237	0.0060898	44.4549	0	56.6257	6.39837	1.67993	3.9532	5.37423	2.50457	17.7326	0.388621	11.1567	1.53246	0.842484	0	4.73018	0.0572257	0	5.13716	1.30098	0.554919	4.25742	4.6678	1.19881	1.82917	29.8409	0.118062	1.99842	0	1.63406	1.87281	0.583298	1.44441	4.3152	24.5699	7.18911	14.7717	27.889	2.99666	0.0316303	6.5109	0.551288	1.30064	0.150231	1.53968
1	Hokkaido	68	Communication	0.232151	0	0.0506546	0	0.188387	0.0520017	0.0268223	0.0741582	0.0144957	0.0276979	0.0807732	0.00361009	0.300778	0.00896529	0.00930689	0	0.00893911	0	0	0.103808	0.317133	0	0.0156069	0.126273	0.0676199	0.0180883	0.054506	0.00219346	0.0382521	0	0.0165939	0.0118932	0.004967	0.00823244	0.118025	0.766826	0.0991192	0.29579	0.356227	0.0556167	0	0.277047	0.0529627	0.0527136	0.00317613	0.0361912
1	Hokkaido	69	Broadcasting	0	0	0	0	0	0	0	0	0	0	0	0	0	0	0	0	0	0	0	0	0	0	0	0	0	0	0	0	0	0	0	0	0	0	0	0	0	0	0	0	0	0	0	0	0	0
1	Hokkaido	70	Information services	0.658193	0	0.0077738	0	0.435342	0.29927	0.0153961	0.0472602	0.0231016	0.0524658	0.240588	0.00445202	0.268454	0.0365589	0.00803418	0	0.0516546	0.00209784	0	0.16875	0.172765	0	0.0128311	0.245262	0.0676787	0.0380702	0.0954641	0.00649203	0.0638651	0	0.0306957	0.0149335	0.0281767	0.0220451	0.0792029	0.372595	0.174342	0.52559	1.53137	0.118569	0.00212582	0.761162	0.209006	0.34191	0.00208899	0.0753776
1	Hokkaido	71	﻿Internet based services	0.0011448	0	0.000571746	0	0.00670472	0.00183422	0.000330269	0.00249551	0.000377572	0.000937889	0.00156789	0	0.0104142	0.000202385	0.000196965	0	0.000216208	0	0	0.00199721	0.00650822	0	0.000220196	0.0058458	0.000995524	0.00040833	0.00145163	0	0.000597817	0	0.000175591	0.000366109	0	0.000199116	0.00324588	0.0157537	0.00268505	0.00507133	0.00760689	0.00108233	0	0.0100089	0.00179339	0.001709	0	0.00102124
1	Hokkaido	72	Image information production and distribution industry	0.21655	0	0.0798655	0	0.381315	0.0704597	0.138403	0.359483	0.026371	0.0556796	0.16426	0.00800425	0.286632	0.265036	0.0309527	0	0.0377518	0	0	0.275496	0.183085	0	0.0269138	0.271222	0.269432	0.0606034	0.304162	0.0129689	0.222686	0	0.0275938	0.0255704	0.0183546	0.0347674	0.0460492	0.679594	0.304742	0.294112	0.499668	0.102052	0	0.900477	0.0825557	0.2122	0.00625963	0.133738
1	Hokkaido	73	Public administration	0	0	0	0	0	0	0	0	0	0	0	0	0	0	0	0	0	0	0	0	0	0	0	0	0	0	0	0	0	0	0	0	0	0	0	0	0	0	0	0	0	0	0	0	0	0
1	Hokkaido	74	Education and Research	0.0621871	0	0.00578532	0	0.492449	0.220961	0.0171492	0.0413655	0.00452432	0.0281709	0.30895	0.00244132	0.0270731	0.121902	0.070805	0	0.233512	0.019844	0	1.64204	0.914744	0.00266756	0.0165348	0.767461	0.227447	0.194737	0.211053	0.0178	0.416753	0	0.0586329	0.0505963	0.000335893	0.043265	0.225911	0.622724	0.0738472	0.902261	5.70633	0.0242092	0.00670289	2.53011	0.389678	0.668051	0.03007	0.198785
1	Hokkaido	75	Medical service, health and social security and nursing care	0.0270377	0	0.00738074	0	0.0566523	0.0287367	0.00174415	0.00974681	0.00216012	0.0018161	0.0173267	0.000268985	0.0177111	0.00213759	0.00173362	0	0.00456718	0.000158436	0	0.0258408	0.0127296	0.00073478	0.00174429	0.0154358	0.00671775	0.00215639	0.0116817	0.000326867	0.00385865	0	0.00278189	0.00145007	0.00222053	0.000525766	0.00232125	0.0357251	0.0118165	0.0159415	0.0884742	0.0200053	0.000160549	0.0179176	0.00200898	0.00250701	0.000157767	0.00344563
1	Hokkaido	76	Advertising and survery	0.299339	0	0.245331	0	11.1584	10.7617	0.146144	0.608599	0.0911323	0.494247	1.70645	0.0737625	0.663908	0.187252	0.106966	0	0.108718	0.00724119	0	29.4334	2.86534	0	0.0132869	1.92496	0.447194	0.0944497	0.337859	0.0448176	0.312631	0	0.127144	0.0662742	0.0507437	0.140173	0.19994	2.66166	0.358756	1.88341	3.51906	0.283006	0.0110066	2.48061	0.442698	0.454504	0.0504744	0.390275
1	Hokkaido	77	Giids rental and leasing services	1.30698	0	0.186763	0	1.5018	0.395086	0.110554	0.199756	0.0842587	0.0928194	0.366792	0.0103781	0.830624	0.0196366	0.0229329	0	0.0755199	0.00349306	0	0.286795	0.0543762	0	0.200828	0.907509	0.34612	0.0851799	0.728375	0.0180162	0.777249	0	0.0664438	0.0479548	0.0550758	0.0289791	0.169277	1.14369	0.662464	1.32854	3.98204	0.707796	0.00353965	2.62367	0.128131	0.283732	0.0139133	0.214687
1	Hokkaido	78	Other business services	2.26257	0	0.375675	0	2.2567	0.505186	0.0662606	0.441726	0.138999	0.120572	0.51171	0.022025	2.31457	0.0772653	0.0751962	0	0.266157	0.00631119	0	0.67145	0.221845	0.00325216	0.0952167	1.23756	0.312843	0.288714	0.881382	0.0108504	0.409108	0	0.0690883	0.147615	0.0319414	0.142726	0.273444	2.04979	0.43185	1.12116	2.60213	0.287558	0.00426357	1.45655	0.212769	0.332884	0.0188537	0.202898
1	Hokkaido	79	Personal services	0.396042	0	0.00706411	0	0.134909	0.0271949	0	0.0144529	0.00349877	0	0.0387436	0	0.0556122	0	0	0	0.00400698	0	0	0.0259099	0.00670093	0	0	0.0371452	0.00922502	0	0.0115299	0	0.00369311	0	0	0	0	0.00738042	0.00751949	0.0583927	0.0142177	0.0436368	0.0671326	0.00802355	0	0.0817432	0.00604308	0.0211153	0	0.00315443
1	Hokkaido	80	Activities not elsewhere classified	0	0	0	0	0	0	0	0	0	0	0	0	0	0	0	0	0	0	0	0	0	0	0	0	0	0	0	0	0	0	0	0	0	0	0	0	0	0	0	0	0	0	0	0	0	0
2	Aomori	1	Agriculture, forestry and fishery	340.367	0	0.00620002	0	700.983	15.5861	2.51417	0.020296	75.4557	0	0.7651	0	0	0.03292	0.0448538	0	0.0844042	0	0	0.0974598	0.83514	0	0.0787978	0	9.75371	0	0	0	0.00648274	0	0	0	0	0	0	0	0	0	0	0	0	0	0	0	0	0
2	Aomori	2	Metallic ores	0	0	0	0	0	0	0	0	0	0	0	0	0	0	0	0	0	0	0	0	0	0	0	0	0	0	0	0	0	0	0	0	0	0	0	0	0	0	0	0	0	0	0	0	0	0
2	Aomori	3	Non-metallic ores	0.0683859	0	0.0207893	0	0	0	0	0	0	0	0.542955	0	0	0.268076	0.254758	0	0.0202154	0	0	0.00933694	0.0140861	-0.0130093	1.92158	0	0.0361984	1.0181	11.3591	0.269104	2.17994	0	0	0.014263	0	0.0589549	0.00948407	0.0202173	0.00597744	0	0	0.00674655	0	0	0	0	0	0
2	Aomori	4	Coal mining, crude petroleum and natural gas	0	0	0	0	0	0	0	0	0	0	0	0	0	0	0	0	0	0	0	0	0	0	0	0	0	0	0	0	0	0	0	0	0	0	0	0	0	0	0	0	0	0	0	0	0	0
2	Aomori	5	Food and Tobacco	224.659	0	0	0	336.143	26.646	-0.0053369	0.236912	0.0244051	0	2.08881	0.00493838	0	0.0196223	0.0127312	0	0.118788	0	0	0.355007	3.00313	0	0	0.0269896	0	0	0	0.0120021	0.103043	0	0	0	0	0	0	0	0	0	0	0	0	0	0	0	0	0
2	Aomori	6	Beverage	0.237704	0	0	0	0.349893	3.68234	0	0	0	0	0	0	0	0	0	0	0	0	0	0	0.00858911	0	0	0	0	0	0	0	0	0	0	0	0	0	0	0	0	0	0	0	0	0	0	0	0	0
2	Aomori	7	Textile products	0.0123792	0	0	0	0.000106532	0.000170008	0.0554374	0.223782	0.000384954	0.0027122	0.00620041	8.49769e-05	0.00107978	0.000487717	0	0	0	0	0	0	0	0	0	0.0012075	0.0393692	3.78467e-05	0	0	0.000258578	0	0	0	0	0	0.000564093	0.000687133	0.000284421	0.000201447	0.0226961	0	0	0	0	0	0.000265821	3.15516e-05
2	Aomori	8	Wearing aparel and other textile products	17.9886	0	1.33786	0	7.21742	1.3691	0.102716	4.9062	0.687791	0.333361	1.26937	0.678901	0.39212	0.431611	0.0350044	0	0.0768483	0	0	0.461423	0.915667	0	1.17399	0.267147	0.722436	0.290272	0.608102	0.148498	0.690581	0	0.171632	0.178927	0.0373631	0.0707732	0.468694	1.36693	0.749861	0.933459	1.65767	0.211586	0	3.27111	0.57949	0.168734	0.0318556	0.604976
2	Aomori	9	Timber and wooden products	1.04914	0	0.018493	0	0.249393	0.0385629	0	0.0176568	6.19632	2.19935	8.32118	0.012356	0.00428195	0.00163653	0	0	0.0034966	0	0	0.00807491	0	0	0	0.0324139	0.00805002	0.0561314	0.0100613	0.0870861	0.0531748	0	0	0.0192428	0	0	0.0902237	0.32971	0.0946019	0.0043937	0.0117164	0.00350079	0	0.0205764	0.00395502	0	0	0.00275265
2	Aomori	10	Furniture and fixtures	0.018905	0	0.0254926	0	0.11768	0.0308958	0	0.0309077	0.0121585	0.35127	0.0353855	0.00605608	0.0227362	0.00300793	0.00292738	0	0.00856899	0.00178356	0	0.0395777	0.0653809	0	0.00109088	0.0587492	0.0657595	0	0.0154106	0.010119	0.0157956	0	0.00695923	0.00453439	0	0.0019729	0.0231158	0.0211184	0.0133021	0.0224322	0.133694	0.00214481	0	0.0395002	0.0201925	0.00470369	0.00177603	0.0371019
2	Aomori	11	Pulp, paper, paperboard, building paper	0.700868	0	0	0	1.46148	0.362798	0.279965	0.16747	2.29379	2.1201	204.157	77.2774	82.4448	0	-0.011131	0	0	0.34587	0	6.93004	0.796891	0	0	2.26533	3.11303	1.60377	0	0.356779	0.0337842	0	0	0	0.011881	0	0.194898	0.167583	0.130062	0.020471	0.0204707	0.0733985	0	0.824473	0.0368542	0.0214622	0.0202594	0.221232
2	Aomori	12	Paper products	8.10535	0	0	0	5.25149	2.4426	0.030247	0.153422	0.0166492	0.129796	0.192638	0.00932946	0.100586	0.0604104	0.00801718	0	0.0205343	0.00366345	0	1.02565	1.1835	0	0.00149379	0.207352	0.135071	0.253462	0.00140683	0.144862	0.0878701	0	0	0	0.024246	0	0.00275248	0.00377195	0.189958	0.00860088	0.0061434	0.0132164	0	0.169173	0.0331806	0.00644097	0.00851199	0.020784
2	Aomori	13	Publishing, printing	0.0150059	0	0.00278861	0	1.64604	0.118425	0.0111752	0.0696056	0.0120852	0.0223003	0.00860304	0.0212404	1.67814	0.0040718	0.00468326	0	0.00197723	0.00131693	0	0.202006	0.0681149	0	0.00161096	0.010692	0.0427893	0.0343546	0.00606869	0.00237733	0.00328024	0	0.00321158	0.00569174	0.000384525	0.00182092	0.0267154	0.0389832	0.0501622	0.0467088	0.0811595	0.00871022	0.000333625	0.0350612	0.0220663	0.000347309	0.00458982	0.0239707
2	Aomori	14	Chemical fertilizer	27.9138	0	0	0	0	0.00351697	0	0	0	0	0	0	0	4.76921	0.215269	0	0.733772	0.00345148	0	0.0689306	0.135189	0	0	0	0.015907	0	0	0	0.0114627	0	0	0	0	0	0	0	0	0	0	0	0	0	0	0.00364097	0	0
2	Aomori	15	Basic inorganic chemical products	0.0328956	0	0.000217603	0	0.2605	0.0330896	0.00471369	0.013	0	0.000642519	0.231133	0.00226809	0.000201539	0.130098	0.153601	0	0.125406	0.00883772	0	0.41594	0.232837	0	0.000754249	0.0568297	0.329445	0.0913799	0.00307812	0.00848045	0.00432299	0	0.00400974	0.00125405	0.000240045	0.0145502	0.00694892	0.046767	0.0072264	0.00909913	0.0233679	0.00296589	0	0.0125901	0.00186151	0.0036858	0.000204661	0.00583015
2	Aomori	16	Basic organic chemical products	0	0	0	0	0	0	0	0	0	0	0	0	0	0	0	0	0	0	0	0	0	0	0	0	0	0	0	0	0	0	0	0	0	0	0	0	0	0	0	0	0	0	0	0	0	0
2	Aomori	17	Organic chemical products	0.00141738	0	0.000283152	0	0.244765	0.24172	0.00907773	0.000463454	0.00308532	0.00390164	0.138732	0.00136214	0.00891645	0.0108248	0.0438954	0	1.74682	0.536485	0	0.64776	0.701838	0	0.00327151	0.443195	2.6606	0.00485332	0.000924311	0.000275876	0.162539	0	0	0	0	0	0.00994637	0.00110144	0.00199462	0.000269093	0.0024218	0.000643219	0	0.00831734	0.00193781	0.000564245	0.00106525	0.00101152
2	Aomori	18	Synthetic resins	0	0	0	0	0	0	0	0	0	0	0	0	0	0	0	0	0	0	0	0	0	0	0	0	0	0	0	0	0	0	0	0	0	0	0	0	0	0	0	0	0	0	0	0	0	0
2	Aomori	19	Synthetic fibers	0	0	0	0	0	0	0	0	0	0	0	0	0	0	0	0	0	0	0	0	0	0	0	0	0	0	0	0	0	0	0	0	0	0	0	0	0	0	0	0	0	0	0	0	0	0
2	Aomori	20	Final chemical products	0.0099614	0	0.000126005	0	0.000580407	0.000194034	8.44962e-05	5.73889e-05	0.00106149	0.00028794	0.000457718	0.000599138	0.00235842	3.95609e-05	2.26479e-05	0	0.00012306	3.31167e-05	0	0.00225858	0.000621541	4.79955e-06	0.000292436	0.00042059	0.000714482	2.58234e-05	0.000171684	3.20263e-06	0.000198199	0	1.00951e-05	2.7363e-05	1.2087e-06	0	6.06492e-05	0.000513594	0.000398053	0.0001614	0.000760134	2.48903e-05	1.0487e-06	0.000232123	5.7177e-05	6.98697e-05	2.06106e-06	4.79491e-05
2	Aomori	21	Medicaments	4.2784	0	0	0	0.377629	0	0	0.00240204	0	0	0	0	0	0	0	0	0	0	0	0.0984272	6.76006	0	0	0	0	0	0	0	0	0	0	0	0	0	0	0	0	0	0	0	0	0	0	0	0	0
2	Aomori	22	Petroleum refinery products	0	0	0	0	0	0	0	0	0	0	0	0	0	0	0	0	0	0	0	0	0	0	0	0	0	0	0	0	0	0	0	0	0	0	0	0	0	0	0	0	0	0	0	0	0	0
2	Aomori	23	Coal products	0	0	2.15296e-05	0	0	0	0	0	0	0	0	0	0	0.000365807	4.45014e-05	0	0.00151432	0	0	0	0	0	0	0	0	0	0	0	0.00102427	0	0.00159681	0.000703095	1.1875e-05	7.87278e-05	4.5835e-05	6.28116e-05	0	1.02303e-05	3.06905e-05	0	0	0	0	0	0	0
2	Aomori	24	Plastic products	2.80288	0	0	0	3.54362	2.10005	0.018873	0.131145	0.13485	0.224333	0.166392	0.0492725	2.20754	0.0702169	0.0249227	0	0.019415	0.00220422	0	0.796456	1.17918	0	0	11.8405	4.2199	0.0825014	0.00677164	0.00378957	0.0162675	0	0	0	0	0.00487642	0.130832	0.212576	0.0931572	0.0835385	4.49254	0.0282739	0.00223361	1.14182	0.0652158	0.787478	0.0329237	0.260526
2	Aomori	25	Rubber products	0.126492	0	0.0204221	0	0.0126322	0.0017279	0.00194453	0.0242432	0.00333456	0.00574291	0.00348738	0.00341872	0.0193302	0.00333644	0.000463871	0	0.00814701	0.000423932	0	0.00682021	0.0255457	0	0.00388936	0.013964	1.89185	0	0.00268614	0	0.0110286	0	0.0138533	0.00625109	0.000247563	0	0.00286663	0.123744	0.011292	0.19792	0.65432	0.00994106	0.00150355	0.101478	0.0168944	0.0272795	0.00316607	0.0593259
2	Aomori	26	Glass and glass products	0.00105002	0	0	0	0.0394017	0.188005	0	0.000536463	0	0.0369044	0	0	0.000121425	0	0.00121945	0	0.000148731	0	0	0.0195093	0.064793	0	0	0.0341242	0.0110714	0.0227524	0.000855937	0	0.00109665	0	0	0	0	0	0.00851283	0.0105821	0.00356221	0.00112134	0.00112133	0	0.00012548	0.00105028	0.000560769	0.000261253	0.000369917	0.000351259
2	Aomori	27	Cement and cement products	0.00495268	0	0	0	0	0	0	0	0	0	0	0	0	0	0	0	0	0	0	0	0	0	0.00381049	0	0	0	6.81662	0	0.017242	0	0	0.00475163	0	0	0	0	0.00331891	0	0	0	0	0	0	0	0	0
2	Aomori	28	Pottery, china and earthenware	0	0	0	0	0.0178038	0.000774872	0	0	0	0.0174334	0	0	0	0	0.000832086	0	0	0	0	0	0	0	0	0.00282237	0	0	0.00438034	0.0258862	0	0	0	0	0	0	0	0	0.00243066	0.00306057	0.00306053	0	0	0.0895821	0	0.00160438	0	0.0158189
2	Aomori	29	Other ceramic, stone and clay products	0.30742	0	0	0	0.0411099	0	0	0	0.00257231	0.00958441	0.0836729	0	0.000601268	0.0027576	0.103324	0	0.00220946	0.00367902	0	0.0088442	0.0326383	0	0.0907587	0.0142236	0.0152601	0.094583	0.437969	0.0461733	0.211106	0	0.0059813	0.0735793	0	0.290297	0.100892	0.172985	0.0888498	0.710737	0.270842	0.0324442	0	0.0832124	0.0255466	0.0633897	0.00183175	0.00985636
2	Aomori	30	Pig iron and crude steel	0	0	0	0	0	0	0	0	0	0	0	0	0	0	0	0	0	0	0	0	0	0	0	0	0	0	0	0	0	0	314.728	8.2629	2.04797	0	0	-1.44942	-2.60505	-1.83887	-5.76503	-0.0296994	0	-0.442224	0	-0.0260529	-0.0245928	-0.0467048
2	Aomori	31	steel products	0.026493	0	0.0077183	0	0	0	0.00143308	0	0.00218445	0.106896	0	0	0	0	0	0	0	0	0	0	0	0	0	0.0492819	0.270222	0	0.346736	0	0.0224814	0	3.01362	0.245703	1.36655	0	0.00880271	6.08623	3.38761	2.34879	3.32222	0.217913	0.00105532	0.902457	0.0429177	0.137875	0.014	0.0305266
2	Aomori	32	Cast and forged steel products	0.0573312	0	0.00409041	0	0	0	0	0	0	0.0241556	0	0	0	0	0	0	0	0	0	0	0	0	0	0	0	0	0.00890173	0.0278971	0.0171077	0	0	0.10215	0	0	0.0783737	3.79885	0.596867	15.0361	9.95915	1.98383	0.00391496	2.82176	0.262439	0.101889	0.00384713	0.0109593
2	Aomori	33	Other iron or steel products	0	0	0	0	0	0	0	0	0	0.409475	0	0	0	0	0	0	0	0	0	0.00297599	0	0	0	0.00373315	0	0	0.112787	0.00276684	0.0371163	0	0	0.0218212	0	0	0.0408089	10.4391	5.39697	3.60966	2.21704	0.0757996	0.001359	0.490391	0	0.142889	0.0333865	0.0215577
2	Aomori	34	Non-ferrous metals	0	0	0	0	0	0	0.0140776	0	0	0.0399772	0	0	-0.210666	0	1.83863	0	0.23961	0	0	4.00963	0	0	0	0.09967	-0.0141446	0.513446	0	0.277016	0.373732	0	0.0748452	0.14825	-0.00896129	20.1996	57.2443	-0.718897	3.33539	-0.0231604	1.17344	0.0461341	0	1.54742	0.0764428	14.7553	0.00764035	0.0362749
2	Aomori	35	Non-ferrous metal products	0	0	0	0	6.614	3.01887	0.0241589	0	0.0966668	1.33095	0	0.0111774	2.20791	0	0	0	0	0	0	0.24836	0.780227	0	0	1.28285	1.73559	0.0149345	0	0.040748	0.524758	0	0	0	0	0.305868	9.24507	150.283	18.1118	41.1505	46.4891	3.67357	0.0266859	26.9527	4.67496	24.8635	0.537583	4.10864
2	Aomori	36	Metal products for construction and architecture	0.00668718	0	0	0	0	0	0	0	0.000945229	0.0131485	0	0	0	0	0	0	0	0	0	0	0	0	0	0	0	0	0.0103831	0	0	0	0	0	0	0	0.00203147	0.960443	0.0364902	0.0544105	0	0.00758676	0	0	0	0	0	0.000852202
2	Aomori	37	Other metal products	0.499967	0	0.441191	0	1.94001	5.02034	0.00302598	0.105747	0.235237	0.568289	0.0968323	0.0130667	0.0420481	0	0.0757943	0	0.0964052	0.015393	0	0.535542	0.779597	0	0.0363145	0.123443	3.3282	0.0523766	0.43827	0.0601115	0.21544	0	0.00107253	0.0592601	0	0.0304055	0.136305	5.63314	2.37574	3.79127	7.22067	0.293529	0.0155983	1.61749	0.36846	0.131064	0.0383201	0.195452
2	Aomori	38	General industrial machinery	0.000642631	0	0.00235362	0	0	0	0	0	0	0.000263241	0	0	0	0	0	0	0	0	0	0	0	0	6.18035e-05	0.0139699	0	0	0	0.000364818	0.0014542	0	0	0.000565166	0.000118016	0.00016766	0.000626337	0.00171665	0.0017764	1.08935	0.396918	0.00486053	0.00035838	0.0168554	0.00425567	0.000266485	0.000804961	0.000621042
2	Aomori	39	Special industrial machinery	0	0	0	0	0	0	0	0	0	0	0	0	0	0	0	0	0	0	0	0	0	0	0	0	0	0	0	0	0	0	0	0	0	0	0	0	0	0.328319	51.6364	0	0	0	0	0.0120778	0	0
2	Aomori	40	Other general machines	0	0	0.0416621	0	0	0	0	0	0.00269149	0.0597252	0	0	0	0	0	0	0	0	0	0.000949126	0	0	0	0.0174622	0	0	0	0.0158836	0.0198869	0	0	0.00869925	0	0	0.023138	0.0413965	0.0291659	1.03632	2.77925	0.683063	0.00086685	0.322474	0.0937496	0.0180481	0.00681465	0.024266
2	Aomori	41	Machinery for office and service industry	0	0	0	0	0	0	0	0	0	0	0	0	0	0	0	0	0	0	0	0	0	0	0	0	0	0	0	0	0	0	0	0	0	0	0	0	0	0	0	0	0.386402	0	0	0	0	0
2	Aomori	42	Industrial electric equipment	0.0400301	0	0.00199922	0	0	0	0	0	0.00198038	0.00393541	0	0	0	0	0	0	0	0	0	0	0	0	0	0.00175208	0	0	0	0	0	0	0	0	0	0	0	0.458833	0.0120713	9.75816	8.65797	0.0340613	0.0172212	21.2123	0.711467	0.262938	0.0620505	0.262465
2	Aomori	43	Applied electric equipment and electric mesuring instruments	0	0	0	0	0	0	0	0	0	0	0	0	0	0	0	0	0	0	0	0	0	0	0	0	0	0	0	0	0	0	0	0	0	0	0	0	0	0.0972539	1.95077	0.0136746	0	1.9022	2.41518	0	0	0
2	Aomori	44	Other electric equipment	0.000802965	0	4.01024e-05	0	4.0309e-05	0	0	0	0	0.000276292	0	0	0	0	0	0	0	0	0	0.000420254	0	0	0	3.51451e-05	0	0	0	0	0	0	0	0	0	0	4.26876e-05	0	0.0009282	0.0125005	0.0454661	0.000318844	3.83823e-05	0.020918	0.0056262	0.0308865	0.000528043	0.00340242
2	Aomori	45	Household electric and electric applications	0	0	0	0	0	0	0	0	0	0	0	0	0	0	0	0	0	0	0	0	0	0	0	0	0	0	0	0	0	0	0	0	0	0	0	0	0	0	0	0	0	0	0	0	0.086235	0
2	Aomori	46	Communication equipment	0.00537695	0	0	0	0	0.00258452	0	0	0	0	0	0	0.00248716	0	0	0	0	0	0	0	0.0356628	0	0	0	0.00467583	0	0	0	0	0	0	0	0	0	0.00285852	0.0104461	0	0.0280728	0.0127602	0	0	0.00239035	0.00459453	0	0	0.163084
2	Aomori	47	Electric computing equipment and accessory equipment	0	0	0	0	0	0	0	0	0	0	0	0	0	0	0	0	0	0	0	0	0	0	0	0	0	0	0	0	0	0	0	0	0	0	0	0	0	0	0.00395736	0	0	0	0	0	0	0.000169044
2	Aomori	48	Semiconductor devices and integrated circuits	0	0	0	0	0	0	0	0	0	0	0	0	0	0	0	0	0	0	0	0	0	0	0	0	0	0	0	0	0	0	0	0	0	0	0	0	0.00794957	0.0156402	0.281519	0.00448621	0.00567052	0.917618	1.21921	0.0006559	0.0402442	0.400956
2	Aomori	49	Other electrical equipment	0	0	0	0	0	0	0	0	0	0	0	0	0.579563	0	0	0	0	0	0	0	0.00645204	0	0	0	0	0	0	0	0	0	0	0	0	0	0.0217206	0.00661457	0.431224	1.15706	19.5663	0.0386277	0.11718	13.7858	17.7468	0.006777	0.658911	8.88097
2	Aomori	50	Passenger motor cars	0	0	0	0	0	0	0	0	0	0	0	0	0	0	0	0	0	0	0	0	0	0	0	0	0	0	0	0	0	0	0	0	0	0	0	0	0	0	0	0	0	0	0	0	0	0
2	Aomori	51	Other cars	0	0	0	0	0	0	0	0	0	0	0	0	0	0	0	0	0	0	0	0	0	0	0	0	0	0	0	0	0	0	0	0	0	0	0	0	0	0	0	0	0	0	0	0	0	0
2	Aomori	52	Motor vheicle parts and accessories	0	0	0	0	0	0	0	0	0	0	0	0	0	0	0	0	0	0	0	0	0	0	0	0	0	0	0	0	0	0	0	0	0	0	0	0	0	0	4.6205e-05	0	0	0	0	0	0	0
2	Aomori	53	Other transportation equipment	2.34454	0	0.00259056	0	0	0	0	0	0	0	0	0	0	0	0	0	0	0	0	0	0	0	0	0	0	0	0	0	0	0	0	0	0	0	0	0	0	0	0	0	0	0	0	0	0	0
2	Aomori	54	Precision instruments	0.249298	0	0	0	0.00736165	0	0	0	0	0	0.0535581	0.0117443	0	0	0	0	0	0	0	0.00767512	0.0208422	0	0	0.0385114	0.0127524	0	0	0.00713573	0.00765789	0	0	0	0	0	0	0.0213672	0	2.45002	9.55632	0	0	0.840978	0.119042	0	0	0.0915726
2	Aomori	55	Miscellaneous manufacturing products	0.101999	0	0.0297012	0	0.0236056	0.0176166	0.000299249	0.252114	0.0143686	0.0353516	0.00473542	0.00249213	0.0019192	0.000366752	0	0	0	0	0	0.000361924	0	0	0.00199514	0.00363204	0.00120269	0.0099894	0.000375797	0.0114406	0.000722223	0	0	0.00696617	0	0	0.0268368	0.00906822	0.00104265	0.0114875	0.0315082	0.00039227	0	0.00307416	0.0059089	0.000344108	0	0.00246751
2	Aomori	56	Reuse and recycling	0	0	0	0	0	0	0	0	0	0	0	0	0	0	0	0	0	0	0	0	0	0	0	0	0	0	0	0	0	0	0	0	0	0	0	0	0	0	0	0	0	0	0	0	0	0
2	Aomori	57	Building construction and repair of construction	0	0	0	0	0	0	0	0	0	0	0	0	0	0	0	0	0	0	0	0	0	0	0	0	0	0	0	0	0	0	0	0	0	0	0	0	0	0	0	0	0	0	0	0	0	0
2	Aomori	58	Public construction	0	0	0	0	0	0	0	0	0	0	0	0	0	0	0	0	0	0	0	0	0	0	0	0	0	0	0	0	0	0	0	0	0	0	0	0	0	0	0	0	0	0	0	0	0	0
2	Aomori	59	Other civil enginnering and construction	0	0	0	0	0	0	0	0	0	0	0	0	0	0	0	0	0	0	0	0	0	0	0	0	0	0	0	0	0	0	0	0	0	0	0	0	0	0	0	0	0	0	0	0	0	0
2	Aomori	60	Electricity	0	0	0	0	0	0	0	0	0	0	0	0	0	0	0	0	0	0	0	0	0	0	0	0	0	0	0	0	0	0	0	0	0	0	0	0	0	0	0	0	0	0	0	0	0	0
2	Aomori	61	Gas supply and heat supply	0	0	0	0	0	0	0	0	0	0	0	0	0	0	0	0	0	0	0	0	0	0	0	0	0	0	0	0	0	0	0	0	0	0	0	0	0	0	0	0	0	0	0	0	0	0
2	Aomori	62	Water supply and waste management services	0	0	0	0	0	0	0	0	0	0	0	0	0	0	0	0	0	0	0	0	0	0	0	0	0	0	0	0	0	0	0	0	0	0	0	0	0	0	0	0	0	0	0	0	0	0
2	Aomori	63	Commerce	18.3816	0	0.443908	0	27.9103	4.65167	0.624898	2.45855	1.41525	0.948475	4.98977	0.152534	6.27761	0.297101	0.21461	0	0.791366	0.0317099	0	2.49537	0.557909	0.0272336	0.643622	6.00985	1.07713	0.352997	1.47478	0.0642088	0.856792	0	0.498351	0.357104	0.807919	0.333873	0.995345	6.67976	1.87948	7.258	15.3843	0.995688	0.0249922	5.39684	0.988192	1.79767	0.0958979	0.520824
2	Aomori	64	Financial and insurance	0.575565	0	0.103094	0	0.167735	0.0947614	0.0285424	0.0961608	0.0249569	0.0180991	0.0964876	0.00261208	0.133368	0.0116859	0.00665918	0	0.0207794	0.000888941	0	0.0710891	0.0138037	0.00158563	0.00276036	0.0376245	0.0184045	0.0153563	0.0882304	0.00275094	0.0231638	0	0.0121399	0.00646703	0.00910448	0.0226917	0.014334	0.213821	0.0323481	0.0822879	0.217413	0.0405396	0.000207876	0.0857088	0.00693652	0.0276274	0.00088519	0.00892268
2	Aomori	65	Real estate agencies and rental services	0	0	0	0	0	0	0	0	0	0	0	0	0	0	0	0	0	0	0	0	0	0	0	0	0	0	0	0	0	0	0	0	0	0	0	0	0	0	0	0	0	0	0	0	0	0
2	Aomori	66	House rent	0	0	0	0	0	0	0	0	0	0	0	0	0	0	0	0	0	0	0	0	0	0	0	0	0	0	0	0	0	0	0	0	0	0	0	0	0	0	0	0	0	0	0	0	0	0
2	Aomori	67	Transport	25.5773	0.000931378	6.79895	0	8.66037	0.97857	0.256929	0.604604	0.821938	0.383051	2.71203	0.0594359	1.70631	0.234376	0.12885	0	0.723436	0.00875214	0	0.78568	0.198972	0.0848697	0.651132	0.713896	0.183347	0.279754	4.56388	0.0180564	0.305639	0	0.249915	0.286429	0.08921	0.220908	0.659969	3.75773	1.09951	2.2592	4.26535	0.45831	0.00483756	0.995781	0.0843143	0.198921	0.0229765	0.235479
2	Aomori	68	Communication	0.0421953	0	0.0092069	0	0.034241	0.00945175	0.00487517	0.0134789	0.00263471	0.00503431	0.0146812	0.000656164	0.0546689	0.00162952	0.0016916	0	0.00162476	0	0	0.0188679	0.0576415	0	0.00283668	0.0229512	0.0122905	0.0032877	0.00990691	0.00039868	0.00695264	0	0.00301607	0.00216169	0.000902794	0.00149631	0.021452	0.139377	0.0180157	0.0537624	0.0647473	0.0101088	0	0.0503555	0.00962641	0.00958114	0.000577288	0.00657804
2	Aomori	69	Broadcasting	0	0	0	0	0	0	0	0	0	0	0	0	0	0	0	0	0	0	0	0	0	0	0	0	0	0	0	0	0	0	0	0	0	0	0	0	0	0	0	0	0	0	0	0	0	0
2	Aomori	70	Information services	0.0673617	0	0.000795597	0	0.0445544	0.0306283	0.00157569	0.00483677	0.0023643	0.00536953	0.0246226	0.000455635	0.0274745	0.00374157	0.000822245	0	0.00528651	0.0002147	0	0.0172705	0.0176814	0	0.00131318	0.0251009	0.00692647	0.00389623	0.00977012	0.000664417	0.00653617	0	0.0031415	0.00152835	0.0028837	0.00225617	0.0081059	0.0381326	0.0178428	0.0537907	0.156725	0.0121348	0.000217563	0.0778999	0.0213904	0.0349923	0.000213794	0.0077144
2	Aomori	71	﻿Internet based services	0.000169715	0	8.47607e-05	0	0.000993968	0.000271921	4.8962e-05	0.000369956	5.59746e-05	0.000139041	0.000232438	0	0.0015439	3.00033e-05	2.91999e-05	0	3.20526e-05	0	0	0.000296083	0.000964836	0	3.26439e-05	0.000866632	0.000147585	6.05345e-05	0.000215203	0	8.86257e-05	0	2.60312e-05	5.42753e-05	0	2.95187e-05	0.000481199	0.00233547	0.000398056	0.000751819	0.00112771	0.000160455	0	0.0014838	0.000265868	0.000253358	0	0.000151397
2	Aomori	72	Image information production and distribution industry	0.0977639	0	0.0360562	0	0.172149	0.0318099	0.0624837	0.162293	0.0119055	0.0251372	0.0741573	0.00361361	0.129403	0.119654	0.013974	0	0.0170435	0	0	0.124376	0.0826561	0	0.0121505	0.122446	0.121638	0.0273601	0.137317	0.00585495	0.100534	0	0.0124575	0.011544	0.00828642	0.0156961	0.0207895	0.306811	0.137579	0.13278	0.225581	0.0460725	0	0.406531	0.0372707	0.0958004	0.00282598	0.0603775
2	Aomori	73	Public administration	0	0	0	0	0	0	0	0	0	0	0	0	0	0	0	0	0	0	0	0	0	0	0	0	0	0	0	0	0	0	0	0	0	0	0	0	0	0	0	0	0	0	0	0	0	0
2	Aomori	74	Education and Research	0	0	0	0	0	0	0	0	0	0	0	0	0	0	0	0	0	0	0	0	0	0	0	0	0	0	0	0	0	0	0	0	0	0	0	0	0	0	0	0	0	0	0	0	0	0
2	Aomori	75	Medical service, health and social security and nursing care	0	0	0	0	0	0	0	0	0	0	0	0	0	0	0	0	0	0	0	0	0	0	0	0	0	0	0	0	0	0	0	0	0	0	0	0	0	0	0	0	0	0	0	0	0	0
2	Aomori	76	Advertising and survery	0.00408545	0	0.00334833	0	0.152292	0.146877	0.00199461	0.0083063	0.00124379	0.00674558	0.02329	0.00100673	0.00906116	0.00255566	0.00145989	0	0.00148381	9.88293e-05	0	0.401713	0.0391068	0	0.000181342	0.0262722	0.00610341	0.00128907	0.00461117	0.00061168	0.00426686	0	0.00173529	0.000904524	0.00069256	0.00191311	0.00272883	0.036327	0.00489638	0.0257052	0.0480289	0.00386253	0.000150221	0.0338559	0.00604204	0.00620318	0.000688886	0.00532656
2	Aomori	77	Giids rental and leasing services	0.150557	0	0.021514	0	0.172998	0.0455116	0.0127352	0.0230107	0.00970611	0.0106922	0.0422523	0.0011955	0.0956829	0.00226202	0.00264173	0	0.00869944	0.00040238	0	0.0330371	0.00626381	0	0.0231342	0.10454	0.0398709	0.00981222	0.0839045	0.00207536	0.0895345	0	0.00765393	0.0055241	0.0063444	0.00333822	0.0194997	0.131746	0.0763119	0.153039	0.458707	0.0815339	0.000407746	0.302231	0.01476	0.0326842	0.00160273	0.0247307
2	Aomori	78	Other business services	0.104896	0	0.0174168	0	0.104624	0.0234211	0.00307193	0.020479	0.00644417	0.00558986	0.0237236	0.00102111	0.107306	0.00358212	0.00348619	0	0.0123394	0.000292595	0	0.0311293	0.010285	0.000150774	0.00441437	0.0573749	0.0145038	0.0133852	0.040862	0.00050304	0.0189668	0	0.00320302	0.00684363	0.00148084	0.00661697	0.0126772	0.0950309	0.0200211	0.0519785	0.120638	0.0133316	0.000197665	0.0675274	0.00986423	0.0154329	0.000874081	0.00940659
2	Aomori	79	Personal services	0.172126	0	0.00307017	0	0.0586337	0.0118193	0	0.00628145	0.00152062	0	0.0168386	0	0.0241699	0	0	0	0.0017415	0	0	0.0112609	0.00291233	0	0	0.0161439	0.00400934	0	0.00501108	0	0.00160509	0	0	0	0	0.00320765	0.00326809	0.0253784	0.00617925	0.0189653	0.0291769	0.00348716	0	0.0355269	0.00262642	0.00917704	0	0.00137097
2	Aomori	80	Activities not elsewhere classified	0	0	0	0	0	0	0	0	0	0	0	0	0	0	0	0	0	0	0	0	0	0	0	0	0	0	0	0	0	0	0	0	0	0	0	0	0	0	0	0	0	0	0	0	0	0
3	Iwate	1	Agriculture, forestry and fishery	239.502	0	0.0043627	0	493.252	10.9673	1.76912	0.0142814	53.095	0	0.538369	0	0	0.0231644	0.0315617	0	0.0593917	0	0	0.0685784	0.587653	0	0.0554467	0	6.86328	0	0	0	0.00456163	0	0	0	0	0	0	0	0	0	0	0	0	0	0	0	0	0
3	Iwate	2	Metallic ores	0	0	0	0	0	0	0	0	0	0	0	0	0	1.3353e-08	8.77189e-07	0	0	1.18765e-08	0	0	0	0	0	0	0	0	0	6.12556e-09	0	0	0	0	0	1.91804e-06	0	0	0	0	0	0	0	0	0	0	0	0
3	Iwate	3	Non-metallic ores	0.0173128	0	0.0052631	0	0	0	0	0	0	0	0.137456	0	0	0.067867	0.0644955	0	0.00511781	0	0	0.00236377	0.00356608	-0.00329347	0.486474	0	0.00916411	0.257747	2.87572	0.0681272	0.551882	0	0	0.00361088	0	0.0149252	0.00240102	0.00511828	0.00151327	0	0	0.00170798	0	0	0	0	0	0
3	Iwate	4	Coal mining, crude petroleum and natural gas	0	0	0	0	0	0	0	0	0	0	0	0	0	0	0	0	0	0	0	0	0	0	0	0	0	0	0	0	0	0	0	0	0	0	0	0	0	0	0	0	0	0	0	0	0	0
3	Iwate	5	Food and Tobacco	212.772	0	0	0	318.356	25.2361	-0.00505451	0.224376	0.0231138	0	1.97828	0.00467707	0	0.018584	0.0120576	0	0.112502	0	0	0.336222	2.84422	0	0	0.0255615	0	0	0	0.011367	0.0975906	0	0	0	0	0	0	0	0	0	0	0	0	0	0	0	0	0
3	Iwate	6	Beverage	3.90374	0	0	0	5.74619	60.474	0	0	0	0	0	0	0	0	0	0	0	0	0	0	0.141056	0	0	0	0	0	0	0	0	0	0	0	0	0	0	0	0	0	0	0	0	0	0	0	0	0
3	Iwate	7	Textile products	0.430599	0	0	0	0.00370563	0.00591356	1.92834	7.78408	0.0133903	0.0943416	0.215676	0.00295585	0.0375592	0.0169648	0	0	0	0	0	0	0	0	0	0.0420018	1.36942	0.00131646	0	0	0.00899441	0	0	0	0	0	0.0196215	0.0239013	0.00989333	0.00700717	0.789464	0	0	0	0	0	0.00924633	0.0010975
3	Iwate	8	Wearing aparel and other textile products	13.1028	0	0.974492	0	5.25713	0.997242	0.0748179	3.57365	0.500983	0.242818	0.924605	0.494507	0.285618	0.314383	0.025497	0	0.0559759	0	0	0.336098	0.666967	0	0.855128	0.194589	0.526218	0.211432	0.442938	0.108165	0.503015	0	0.125016	0.13033	0.027215	0.0515508	0.341394	0.995662	0.546194	0.679926	1.20744	0.154118	0	2.38266	0.422097	0.122905	0.0232034	0.440661
3	Iwate	9	Timber and wooden products	9.58703	0	0.16899	0	2.27896	0.352389	0	0.161348	56.6221	20.0977	76.0391	0.11291	0.0391286	0.0149546	0	0	0.0319521	0	0	0.0737887	0	0	0	0.296199	0.0735612	0.51293	0.0919407	0.795795	0.485913	0	0	0.175842	0	0	0.824466	3.0129	0.864474	0.0401497	0.107064	0.0319903	0	0.188028	0.0361411	0	0	0.0251537
3	Iwate	10	Furniture and fixtures	0.0885447	0	0.119399	0	0.551175	0.144706	0	0.144762	0.0569466	1.64523	0.165734	0.0283647	0.106489	0.0140882	0.0137109	0	0.0401343	0.00835359	0	0.185369	0.306223	0	0.00510934	0.275162	0.307996	0	0.0721781	0.047394	0.0739813	0	0.0325947	0.0212376	0	0.00924039	0.108267	0.0989115	0.0623028	0.105065	0.62618	0.0100456	0	0.185006	0.0945752	0.0220305	0.00831834	0.173773
3	Iwate	11	Pulp, paper, paperboard, building paper	0.172838	0	0	0	0.360408	0.0894679	0.0690409	0.041299	0.56566	0.522828	50.3462	19.057	20.3313	0	-0.00274497	0	0	0.0852933	0	1.70899	0.196518	0	0	0.558643	0.76769	0.395498	0	0.0879837	0.00833136	0	0	0	0.00292993	0	0.0480628	0.0413268	0.032074	0.00504826	0.00504819	0.0181005	0	0.203319	0.00908846	0.0052927	0.00499608	0.054557
3	Iwate	12	Paper products	22.491	0	0	0	14.572	6.77781	0.0839304	0.42572	0.0461988	0.360163	0.534537	0.0258877	0.279108	0.167629	0.0222463	0	0.0569793	0.0101655	0	2.84601	3.28401	0	0.00414503	0.575366	0.3748	0.703316	0.0039037	0.401968	0.243825	0	0	0	0.0672785	0	0.00763766	0.0104665	0.527103	0.023866	0.0170469	0.0366734	0	0.469427	0.0920707	0.0178726	0.0236193	0.057672
3	Iwate	13	Publishing, printing	0.0321237	0	0.00596968	0	3.52375	0.253516	0.0239232	0.149008	0.0258713	0.0477391	0.0184169	0.0454702	3.59246	0.00871667	0.0100257	0	0.00423274	0.00281922	0	0.432442	0.145816	0	0.00344865	0.0228888	0.0916008	0.0735443	0.0129915	0.00508925	0.00702214	0	0.00687515	0.0121845	0.000823169	0.00389812	0.0571907	0.0834529	0.107384	0.0999915	0.173742	0.0186463	0.000714204	0.075057	0.0472383	0.000743498	0.00982562	0.0513152
3	Iwate	14	Chemical fertilizer	70.526	0	0	0	0	0.00888584	0	0	0	0	0	0	0	12.0497	0.543891	0	1.85392	0.00872038	0	0.174157	0.341563	0	0	0	0.0401899	0	0	0	0.0289611	0	0	0	0	0	0	0	0	0	0	0	0	0	0	0.00919914	0	0
3	Iwate	15	Basic inorganic chemical products	0.0360744	0	0.00023863	0	0.285673	0.0362871	0.00516918	0.0142563	0	0.000704606	0.253468	0.00248726	0.000221014	0.142669	0.168444	0	0.137524	0.00969172	0	0.456133	0.255336	0	0.000827133	0.0623212	0.36128	0.10021	0.00337557	0.00929993	0.00474072	0	0.0043972	0.00137523	0.000263241	0.0159562	0.00762041	0.0512862	0.0079247	0.00997839	0.025626	0.00325249	0	0.0138067	0.00204139	0.00404197	0.000224438	0.00639352
3	Iwate	16	Basic organic chemical products	0	0	0	0	1.13165e-05	0	0	0	0	0	3.08739e-05	0	0.000114701	0.00126731	0	0	0.098781	0.00111654	0	0.00174615	0.000202914	0	0	9.86674e-06	0.000254842	0.000144731	0	0	2.35437e-05	0	0	1.08138e-05	0	0	0	0	0	5.34973e-05	0	0	0	0	0	0	0	0
3	Iwate	17	Organic chemical products	0.000204959	0	4.09451e-05	0	0.0353941	0.0349539	0.00131268	6.70175e-05	0.000446151	0.000564195	0.0200612	0.000196972	0.00128936	0.00156531	0.00634747	0	0.252598	0.0775781	0	0.093669	0.101489	0	0.000473075	0.064088	0.384736	0.000701813	0.00013366	3.98929e-05	0.0235039	0	0	0	0	0	0.00143829	0.000159274	0.000288431	3.8912e-05	0.000350203	9.30124e-05	0	0.00120273	0.000280216	8.15924e-05	0.000154039	0.00014627
3	Iwate	18	Synthetic resins	0	0	0	0	0	0	0.000369983	0	2.01416e-05	0.000540343	0.000762046	0.000146724	0.000677957	0	0	0	0	0	0	0.0119965	0	0	0	0.182848	0.000477956	0	0	0	0.000595291	0	0	0	0	0	0.00160165	5.93211e-05	0.000163696	0	0	0.000161664	0	0.0059727	0	0.000384927	0.000152991	0.000326868
3	Iwate	19	Synthetic fibers	0	0	0	0	0	0	0	0	0	0	0	0	0	0	0	0	0	0	0	0	0	0	0	0	0	0	0	0	0	0	0	0	0	0	0	0	0	0	0	0	0	0	0	0	0	0
3	Iwate	20	Final chemical products	6.09319	0	0.0770749	0	0.355023	0.118687	0.0516846	0.0351036	0.649295	0.176127	0.279977	0.36648	1.4426	0.0241986	0.0138533	0	0.0752731	0.0202568	0	1.38153	0.380184	0.00293579	0.178877	0.257266	0.437034	0.0157956	0.105016	0.00195898	0.121235	0	0.00617498	0.0167374	0.000739337	0	0.0370979	0.314155	0.243481	0.0987254	0.464958	0.0152249	0.000641469	0.141985	0.034974	0.0427379	0.00126071	0.0293295
3	Iwate	21	Medicaments	6.04665	0	0	0	0.533702	0	0	0.0033948	0	0	0	0	0	0	0	0	0	0	0	0.139107	9.55398	0	0	0	0	0	0	0	0	0	0	0	0	0	0	0	0	0	0	0	0	0	0	0	0	0
3	Iwate	22	Petroleum refinery products	0	0	0	0	0	0	0	0	0	0	0	0	0	0	0	0	0	0	0	0	0	0	0	0	0	0	0	0	0	0	0	0	0	0	0	0	0	0	0	0	0	0	0	0	0	0
3	Iwate	23	Coal products	0	0	1.2666e-05	0	0	0	0	0	0	0	0	0	0	0.000215207	2.61805e-05	0	0.000890886	0	0	0	0	0	0	0	0	0	0	0	0.000602584	0	0.000939415	0.000413636	6.98616e-06	4.63162e-05	2.69651e-05	3.69525e-05	0	6.01857e-06	1.80554e-05	0	0	0	0	0	0	0
3	Iwate	24	Plastic products	15.2391	0	0	0	19.2665	11.4178	0.102611	0.713026	0.733175	1.21969	0.904666	0.267892	12.0023	0.381765	0.135504	0	0.105559	0.0119842	0	4.33029	6.41115	0	0	64.3761	22.9434	0.448556	0.036817	0.0206037	0.0884457	0	0	0	0	0.0265129	0.711327	1.15577	0.506491	0.454195	24.4257	0.153724	0.012144	6.20802	0.354575	4.28147	0.179005	1.41647
3	Iwate	25	Rubber products	0.386681	0	0.0624294	0	0.038616	0.00528211	0.00594435	0.0741103	0.0101936	0.0175558	0.0106608	0.0104509	0.0590914	0.0101993	0.00141803	0	0.0249051	0.00129594	0	0.0208491	0.0780921	0	0.0118896	0.0426874	5.78331	0	0.00821142	0	0.0337141	0	0.0423491	0.0191093	0.00075679	0	0.00876315	0.37828	0.0345192	0.605032	2.00023	0.0303894	0.00459628	0.310215	0.0516454	0.0833923	0.00967853	0.181356
3	Iwate	26	Glass and glass products	0.0381408	0	0	0	1.43122	6.82905	0	0.0194864	0	1.34051	0	0	0.0044106	0	0.044295	0	0.00540249	0	0	0.708652	2.35353	0	0	1.23952	0.402156	0.826454	0.0310909	0	0.0398345	0	0	0	0	0	0.309218	0.384383	0.129393	0.0407313	0.0407308	0	0.0045579	0.0381503	0.0203692	0.0094897	0.0134368	0.0127591
3	Iwate	27	Cement and cement products	0.0105405	0	0	0	0	0	0	0	0	0	0	0	0	0	0	0	0	0	0	0	0	0	0.00810968	0	0	0	14.5075	0	0.0366953	0	0	0.0101127	0	0	0	0	0.00706348	0	0	0	0	0	0	0	0	0
3	Iwate	28	Pottery, china and earthenware	0	0	0	0	0.0124828	0.000543287	0	0	0	0.0122231	0	0	0	0	0.000583402	0	0	0	0	0	0	0	0	0.00197885	0	0	0.00307119	0.0181496	0	0	0	0	0	0	0	0	0.00170421	0.00214586	0.00214583	0	0	0.0628088	0	0.00112488	0	0.0110911
3	Iwate	29	Other ceramic, stone and clay products	1.31971	0	0	0	0.176478	0	0	0	0.0110425	0.0411444	0.359195	0	0.00258115	0.0118379	0.443556	0	0.00948485	0.0157935	0	0.0379668	0.140111	0	0.389613	0.0610595	0.0655092	0.40603	1.88013	0.198215	0.906244	0	0.0256768	0.315864	0	1.2462	0.433115	0.742596	0.381418	3.05109	1.16268	0.139278	0	0.357218	0.109668	0.272122	0.00786342	0.0423119
3	Iwate	30	Pig iron and crude steel	0	0	0	0	0	0	0	0	0	0	0	0	0	0	0	0	0	0	0	0	0	0	0	0	0	0	0	0	0	0	0	0	0	0	0	0	0	0	0	0	0	0	0	0	0	0
3	Iwate	31	steel products	0.135071	0	0.0393507	0	0	0	0.00730637	0	0.0111371	0.544992	0	0	0	0	0	0	0	0	0	0	0	0	0	0.251257	1.37769	0	1.76779	0	0.114618	0	15.3645	1.25268	6.96715	0	0.0448794	31.0298	17.2713	11.975	16.9379	1.111	0.00538041	4.60105	0.21881	0.702937	0.071377	0.155636
3	Iwate	32	Cast and forged steel products	0.182393	0	0.0130132	0	0	0	0	0	0	0.0768484	0	0	0	0	0	0	0	0	0	0	0	0	0	0	0	0	0.0283199	0.0887516	0.0544264	0	0	0.32498	0	0	0.249338	12.0856	1.89887	47.8358	31.684	6.31134	0.012455	8.97712	0.834923	0.324147	0.0122392	0.0348657
3	Iwate	33	Other iron or steel products	0	0	0	0	0	0	0	0	0	1.98004	0	0	0	0	0	0	0	0	0	0.0143906	0	0	0	0.0180519	0	0	0.545391	0.0133793	0.179479	0	0	0.105518	0	0	0.197334	50.4791	26.0974	17.4548	10.7207	0.366535	0.00657156	2.37132	0	0.690951	0.161443	0.104244
3	Iwate	34	Non-ferrous metals	0	0	0	0	0	0	0.00691115	0	0	0.0196261	0	0	-0.103423	0	0.902643	0	0.117632	0	0	1.96846	0	0	0	0.0489312	-0.00694405	0.252067	0	0.135996	0.183477	0	0.0367439	0.0727807	-0.00439938	9.91665	28.103	-0.352929	1.63745	-0.0113702	0.576081	0.0226487	0	0.759677	0.0375282	7.24384	0.00375089	0.0178085
3	Iwate	35	Non-ferrous metal products	0	0	0	0	1.19959	0.547538	0.00438175	0	0.0175327	0.241397	0	0.00202728	0.400453	0	0	0	0	0	0	0.0450455	0.141511	0	0	0.232672	0.314787	0.0027087	0	0.00739055	0.0951764	0	0	0	0	0.0554759	1.6768	27.2571	3.28497	7.46355	8.43182	0.666283	0.00484008	4.88846	0.847907	4.50955	0.0975025	0.745193
3	Iwate	36	Metal products for construction and architecture	0.0239027	0	0	0	0	0	0	0	0.00337863	0.0469981	0	0	0	0	0	0	0	0	0	0	0	0	0	0	0	0	0.0371134	0	0	0	0	0	0	0	0.00726129	3.43301	0.130431	0.194485	0	0.0271182	0	0	0	0	0	0.00304612
3	Iwate	37	Other metal products	4.26054	0	3.75968	0	16.5321	42.7816	0.0257863	0.901138	2.00461	4.84276	0.825171	0.11135	0.358319	0	0.645892	0	0.821531	0.131174	0	4.5637	6.64346	0	0.309459	1.05194	28.3618	0.446335	3.73478	0.51225	1.83591	0	0.00913972	0.504994	0	0.259105	1.16154	48.0037	20.2452	32.3079	61.5321	2.50135	0.132923	13.7837	3.13989	1.11689	0.32655	1.66557
3	Iwate	38	General industrial machinery	0.0459854	0	0.168421	0	0	0	0	0	0	0.018837	0	0	0	0	0	0	0	0	0	0	0	0	0.00442253	0.999661	0	0	0	0.0261057	0.104059	0	0	0.0404421	0.00844501	0.0119974	0.0448194	0.12284	0.127116	77.9519	28.4026	0.34781	0.0256449	1.20614	0.304527	0.0190691	0.0576014	0.0444405
3	Iwate	39	Special industrial machinery	0	0	0	0	0	0	0	0	0	0	0	0	0	0	0	0	0	0	0	0	0	0	0	0	0	0	0	0	0	0	0	0	0	0	0	0	0	2.10346	330.821	0	0	0	0	0.0773793	0	0
3	Iwate	40	Other general machines	0	0	0.578549	0	0	0	0	0	0.0373759	0.829386	0	0	0	0	0	0	0	0	0	0.0131802	0	0	0	0.242493	0	0	0	0.220571	0.276164	0	0	0.120804	0	0	0.32131	0.574861	0.405019	14.391	38.5946	9.4855	0.0120377	4.4781	1.30187	0.250629	0.0946331	0.336975
3	Iwate	41	Machinery for office and service industry	0	0	0	0	0	0	0	0	0	0	0	0	0	0	0	0	0	0	0	0	0	0	0	0	0	0	0	0	0	0	0	0	0	0	0	0	0	0	0	0	0.341524	0	0	0	0	0
3	Iwate	42	Industrial electric equipment	0.10745	0	0.00536639	0	0	0	0	0	0.00531582	0.0105636	0	0	0	0	0	0	0	0	0	0	0	0	0	0.00470301	0	0	0	0	0	0	0	0	0	0	0	1.23162	0.0324023	26.1932	23.2401	0.0914287	0.0462259	56.9389	1.90975	0.705788	0.166558	0.704519
3	Iwate	43	Applied electric equipment and electric mesuring instruments	0	0	0	0	0	0	0	0	0	0	0	0	0	0	0	0	0	0	0	0	0	0	0	0	0	0	0	0	0	0	0	0	0	0	0	0	0	0.115459	2.31594	0.0162344	0	2.25827	2.86728	0	0	0
3	Iwate	44	Other electric equipment	0.0191707	0	0.000957439	0	0.00096237	0	0	0	0	0.00659643	0	0	0	0	0	0	0	0	0	0.0100335	0	0	0	0.000839083	0	0	0	0	0	0	0	0	0	0	0.00101916	0	0.0221606	0.298447	1.0855	0.00761235	0.000916372	0.499413	0.134325	0.73741	0.0126069	0.0812322
3	Iwate	45	Household electric and electric applications	0	0	0	0	0	0	0	0	0	0	0	0	0	0	0	0	0	0	0	0	0	0	0	0	0	0	0	0	0	0	0	0	0	0	0	0	0	0	0	0	0	0	0	0	0.116526	0
3	Iwate	46	Communication equipment	0.0530576	0	0	0	0	0.025503	0	0	0	0	0	0	0.0245423	0	0	0	0	0	0	0	0.351906	0	0	0	0.0461392	0	0	0	0	0	0	0	0	0	0.0282067	0.103077	0	0.277011	0.125912	0	0	0.023587	0.0453369	0	0	1.60925
3	Iwate	47	Electric computing equipment and accessory equipment	0	0	0	0	0	0	0	0	0	0	0	0	0	0	0	0	0	0	0	0	0	0	0	0	0	0	0	0	0	0	0	0	0	0	0	0	0	0	0.0341409	0	0	0	0	0	0	0.00145837
3	Iwate	48	Semiconductor devices and integrated circuits	0	0	0	0	0	0	0	0	0	0	0	0	0	0	0	0	0	0	0	0	0	0	0	0	0	0	0	0	0	0	0	0	0	0	0	0	0.0891911	0.175477	3.15854	0.0503336	0.063621	10.2953	13.6791	0.00735895	0.451524	4.49858
3	Iwate	49	Other electrical equipment	0	0	0	0	0	0	0	0	0	0	0	0	1.14439	0	0	0	0	0	0	0	0.01274	0	0	0	0	0	0	0	0	0	0	0	0	0	0.0428887	0.0130609	0.85148	2.28468	38.6349	0.0762729	0.231379	27.2211	35.0422	0.0133816	1.30106	17.536
3	Iwate	50	Passenger motor cars	0	0	0	0	0	0	0	0	0	0	0	0	0	0	0	0	0	0	0	0	0	0	0	0	0	0	0	0	0	0	0	0	0	0	0	0	0	0	0	0	0	0	0	0	0	0
3	Iwate	51	Other cars	0	0	0	0	0	0	0	0	0	0	0	0	0	0	0	0	0	0	0	0	0	0	0	0	0	0	0	0	0	0	0	0	0	0	0	0	0	0	0	0	0	0	0	0	0	0
3	Iwate	52	Motor vheicle parts and accessories	0	0	0	0	0	0	0	0	0	0	0	0	0	0	0	0	0	0	0	0	0	0	0	0	0	0	0	0	0	0	0	0	0	0	0	0	0	0	0.00234386	0	0	0	0	0	0	0
3	Iwate	53	Other transportation equipment	3.19758	0	0.0035331	0	0	0	0	0	0	0	0	0	0	0	0	0	0	0	0	0	0	0	0	0	0	0	0	0	0	0	0	0	0	0	0	0	0	0	0	0	0	0	0	0	0	0
3	Iwate	54	Precision instruments	0.311119	0	0	0	0.00918719	0	0	0	0	0	0.0668394	0.0146566	0	0	0	0	0	0	0	0.00957838	0.0260106	0	0	0.0480614	0.0159148	0	0	0.00890524	0.00955689	0	0	0	0	0	0	0.0266658	0	3.05757	11.9261	0	0	1.04952	0.148561	0	0	0.114281
3	Iwate	55	Miscellaneous manufacturing products	0.95145	0	0.277055	0	0.220195	0.164329	0.00279141	2.35174	0.134031	0.329762	0.0441723	0.0232467	0.0179025	0.00342109	0	0	0	0	0	0.00337605	0	0	0.0186109	0.03388	0.0112188	0.0931819	0.00350546	0.106719	0.00673695	0	0	0.064981	0	0	0.250335	0.084589	0.00972596	0.107156	0.293911	0.00365913	0	0.028676	0.0551187	0.00320986	0	0.0230171
3	Iwate	56	Reuse and recycling	0.302176	0	0	0	0.414886	0.886372	0.00894116	0	0	0	5.71376	0	0	1.14238	0.127975	0	0.0321929	0	0	0.00270345	0	0.0113002	0	4.0424	0.00673779	0.320579	0.474397	0.191023	0.0134869	0	0.501512	1.08035	0.261814	2.92167	0.686513	0	0.0025961	0	0	0	0	0	0	0	0	0
3	Iwate	57	Building construction and repair of construction	0	0	0	0	0	0	0	0	0	0	0	0	0	0	0	0	0	0	0	0	0	0	0	0	0	0	0	0	0	0	0	0	0	0	0	0	0	0	0	0	0	0	0	0	0	0
3	Iwate	58	Public construction	0	0	0	0	0	0	0	0	0	0	0	0	0	0	0	0	0	0	0	0	0	0	0	0	0	0	0	0	0	0	0	0	0	0	0	0	0	0	0	0	0	0	0	0	0	0
3	Iwate	59	Other civil enginnering and construction	0	0	0	0	0	0	0	0	0	0	0	0	0	0	0	0	0	0	0	0	0	0	0	0	0	0	0	0	0	0	0	0	0	0	0	0	0	0	0	0	0	0	0	0	0	0
3	Iwate	60	Electricity	0	0	0	0	0	0	0	0	0	0	0	0	0	0	0	0	0	0	0	0	0	0	0	0	0	0	0	0	0	0	0	0	0	0	0	0	0	0	0	0	0	0	0	0	0	0
3	Iwate	61	Gas supply and heat supply	0	0	0	0	0	0	0	0	0	0	0	0	0	0	0	0	0	0	0	0	0	0	0	0	0	0	0	0	0	0	0	0	0	0	0	0	0	0	0	0	0	0	0	0	0	0
3	Iwate	62	Water supply and waste management services	0	0	0	0	0	0	0	0	0	0	0	0	0	0	0	0	0	0	0	0	0	0	0	0	0	0	0	0	0	0	0	0	0	0	0	0	0	0	0	0	0	0	0	0	0	0
3	Iwate	63	Commerce	11.3033	0	0.27297	0	17.1627	2.86043	0.384265	1.51182	0.870272	0.583241	3.06833	0.0937971	3.86026	0.182695	0.131969	0	0.48663	0.0194992	0	1.53446	0.343072	0.0167466	0.395779	3.69561	0.662351	0.217066	0.906882	0.0394836	0.526863	0	0.306448	0.219592	0.496809	0.205307	0.612062	4.10755	1.15574	4.46312	9.46021	0.612273	0.0153683	3.31865	0.607664	1.10543	0.05897	0.320268
3	Iwate	64	Financial and insurance	0.0371379	0	0.00665206	0	0.010823	0.00611442	0.00184168	0.00620471	0.00161033	0.00116783	0.0062258	0.000168543	0.00860547	0.000754026	0.000429679	0	0.00134078	5.73583e-05	0	0.00458698	0.000890677	0.000102312	0.00017811	0.0024277	0.00118754	0.000990858	0.00569301	0.000177503	0.00149463	0	0.000783319	0.000417281	0.000587461	0.00146417	0.000924891	0.0137966	0.00208724	0.00530958	0.0140284	0.00261579	1.34131e-05	0.0055303	0.000447574	0.00178264	5.71163e-05	0.00057573
3	Iwate	65	Real estate agencies and rental services	0	0	0	0	0	0	0	0	0	0	0	0	0	0	0	0	0	0	0	0	0	0	0	0	0	0	0	0	0	0	0	0	0	0	0	0	0	0	0	0	0	0	0	0	0	0
3	Iwate	66	House rent	0	0	0	0	0	0	0	0	0	0	0	0	0	0	0	0	0	0	0	0	0	0	0	0	0	0	0	0	0	0	0	0	0	0	0	0	0	0	0	0	0	0	0	0	0	0
3	Iwate	67	Transport	22.5864	0.000822467	6.00391	0	7.64767	0.86414	0.226885	0.533905	0.725824	0.338258	2.3949	0.0524857	1.50678	0.206969	0.113783	0	0.638841	0.0077287	0	0.693806	0.175705	0.0749454	0.574992	0.630416	0.161907	0.247041	4.0302	0.015945	0.269899	0	0.220691	0.252935	0.0787782	0.195076	0.582795	3.31832	0.970935	1.99502	3.76658	0.404718	0.00427188	0.879339	0.074455	0.17566	0.0202897	0.207943
3	Iwate	68	Communication	0.00624809	0	0.00136332	0	0.00507025	0.00139957	0.000721894	0.00199589	0.000390136	0.000745459	0.00217393	9.71618e-05	0.00809513	0.000241291	0.000250485	0	0.000240587	0	0	0.00279388	0.0085353	0	0.000420043	0.00339851	0.00181992	0.000486828	0.00146697	5.90348e-05	0.00102952	0	0.000446607	0.000320093	0.000133682	0.000221568	0.00317652	0.0206383	0.00266769	0.00796089	0.00958749	0.00149687	0	0.00745642	0.00142544	0.00141873	8.54822e-05	0.000974048
3	Iwate	69	Broadcasting	0	0	0	0	0	0	0	0	0	0	0	0	0	0	0	0	0	0	0	0	0	0	0	0	0	0	0	0	0	0	0	0	0	0	0	0	0	0	0	0	0	0	0	0	0	0
3	Iwate	70	Information services	0	0	0	0	0	0	0	0	0	0	0	0	0	0	0	0	0	0	0	0	0	0	0	0	0	0	0	0	0	0	0	0	0	0	0	0	0	0	0	0	0	0	0	0	0	0
3	Iwate	71	﻿Internet based services	0	0	0	0	0	0	0	0	0	0	0	0	0	0	0	0	0	0	0	0	0	0	0	0	0	0	0	0	0	0	0	0	0	0	0	0	0	0	0	0	0	0	0	0	0	0
3	Iwate	72	Image information production and distribution industry	0.000515363	0	0.000190071	0	0.000907486	0.000167686	0.000329383	0.000855529	6.27599e-05	0.000132511	0.000390921	1.90492e-05	0.000682151	0.000630756	7.36639e-05	0	8.98449e-05	0	0	0.00065565	0.000435722	0	6.40516e-05	0.000645477	0.000641218	0.000144229	0.00072387	3.08644e-05	0.000529967	0	6.56701e-05	6.08545e-05	4.36819e-05	8.27424e-05	0.000109592	0.00161736	0.000725251	0.000699954	0.00118915	0.000242872	0	0.00214303	0.000196473	0.000505013	1.48972e-05	0.00031828
3	Iwate	73	Public administration	0	0	0	0	0	0	0	0	0	0	0	0	0	0	0	0	0	0	0	0	0	0	0	0	0	0	0	0	0	0	0	0	0	0	0	0	0	0	0	0	0	0	0	0	0	0
3	Iwate	74	Education and Research	0	0	0	0	0	0	0	0	0	0	0	0	0	0	0	0	0	0	0	0	0	0	0	0	0	0	0	0	0	0	0	0	0	0	0	0	0	0	0	0	0	0	0	0	0	0
3	Iwate	75	Medical service, health and social security and nursing care	0	0	0	0	0	0	0	0	0	0	0	0	0	0	0	0	0	0	0	0	0	0	0	0	0	0	0	0	0	0	0	0	0	0	0	0	0	0	0	0	0	0	0	0	0	0
3	Iwate	76	Advertising and survery	0.021046	0	0.0172488	0	0.784527	0.756632	0.0102751	0.0427895	0.00640734	0.0347495	0.119977	0.0051861	0.0466781	0.0131654	0.00752056	0	0.00764377	0.000509114	0	2.0694	0.201457	0	0.000934174	0.13534	0.0314414	0.00664058	0.0237542	0.00315104	0.0219805	0	0.00893926	0.00465961	0.00356769	0.00985531	0.0140574	0.187137	0.0252234	0.132419	0.247418	0.0198976	0.000773856	0.174407	0.0311252	0.0319553	0.00354876	0.0274395
3	Iwate	77	Giids rental and leasing services	0.15944	0	0.0227833	0	0.183205	0.0481968	0.0134866	0.0243684	0.0102788	0.0113231	0.0447452	0.00126603	0.101328	0.00239548	0.00279759	0	0.00921272	0.000426121	0	0.0349863	0.00663338	0	0.0244992	0.110708	0.0422233	0.0103912	0.088855	0.00219781	0.0948172	0	0.00810553	0.00585003	0.00671873	0.00353517	0.0206502	0.13952	0.0808144	0.162069	0.485771	0.0863445	0.000431804	0.320063	0.0156308	0.0346126	0.00169729	0.0261898
3	Iwate	78	Other business services	0	0	0	0	0	0	0	0	0	0	0	0	0	0	0	0	0	0	0	0	0	0	0	0	0	0	0	0	0	0	0	0	0	0	0	0	0	0	0	0	0	0	0	0	0	0
3	Iwate	79	Personal services	0.0970835	0	0.00173165	0	0.0330709	0.0066664	0	0.00354289	0.000857668	0	0.00949738	0	0.0136324	0	0	0	0.000982248	0	0	0.00635141	0.00164263	0	0	0.00910555	0.00226137	0	0.00282638	0	0.000905308	0	0	0	0	0.00180919	0.00184328	0.014314	0.00348525	0.0106969	0.0164565	0.00196685	0	0.0200381	0.00148137	0.00517608	0	0.000773259
3	Iwate	80	Activities not elsewhere classified	0.0546105	0	0.00263171	0	0.218835	0.0676959	0.072348	0.132162	0.0372077	0.105964	0.215195	0.0120847	0.0237095	0.020325	0.0400561	0	0.096624	0.046098	0	0.110817	0.00181557	0.0628791	0.000552845	0.0115319	0.0033326	0.0625367	0.168173	0.00396267	0.0570355	0	0.128289	0.00137878	0.0820792	0.000999837	0.0216469	0.229871	0.225113	0.0979952	0.384018	0.196468	0.00343477	0.026194	0.00347932	0.145648	0.00877567	0.0164524
4	Miyagi	1	Agriculture, forestry and fishery	249.29	0	0.00454099	0	513.41	11.4155	1.84142	0.0148651	55.2648	0	0.56037	0	0	0.0241111	0.0328516	0	0.0618189	0	0	0.071381	0.611669	0	0.0577127	0	7.14376	0	0	0	0.00474805	0	0	0	0	0	0	0	0	0	0	0	0	0	0	0	0	0
4	Miyagi	2	Metallic ores	0	0	0	0	0	0	0	0	0	0	0	0	0	0	0	0	0	0	0	0	0	0	0	0	0	0	0	0	0	0	0	0	0	0	0	0	0	0	0	0	0	0	0	0	0	0
4	Miyagi	3	Non-metallic ores	0.00573847	0	0.0017445	0	0	0	0	0	0	0	0.045561	0	0	0.0224951	0.0213776	0	0.00169634	0	0	0.000783491	0.00118201	-0.00109165	0.161246	0	0.00303752	0.0854323	0.95318	0.0225813	0.182926	0	0	0.00119685	0	0.00494709	0.000795838	0.00169649	0.000501586	0	0	0.000566124	0	0	0	0	0	0
4	Miyagi	4	Coal mining, crude petroleum and natural gas	0	0	0	0	0	0	0	0	0	0	0	0	0	0	0	0	0	0	0	0	0	0	0	0	0	0	0	0	0	0	0	0	0	0	0	0	0	0	0	0	0	0	0	0	0	0
4	Miyagi	5	Food and Tobacco	448.014	0	0	0	670.334	53.1374	-0.0106428	0.472449	0.0486686	0	4.16549	0.00984809	0	0.0391308	0.0253886	0	0.236886	0	0	0.707953	5.98882	0	0	0.0538226	0	0	0	0.0239345	0.205488	0	0	0	0	0	0	0	0	0	0	0	0	0	0	0	0	0
4	Miyagi	6	Beverage	2.60237	0	0	0	3.83061	40.3141	0	0	0	0	0	0	0	0	0	0	0	0	0	0	0.0940332	0	0	0	0	0	0	0	0	0	0	0	0	0	0	0	0	0	0	0	0	0	0	0	0	0
4	Miyagi	7	Textile products	0.258714	0	0	0	0.00222642	0.003553	1.15859	4.67685	0.00804518	0.0566825	0.129583	0.00177594	0.0225664	0.0101928	0	0	0	0	0	0	0	0	0	0.0252356	0.82278	0.000790961	0	0	0.00540404	0	0	0	0	0	0.011789	0.0143604	0.00594413	0.00421006	0.474327	0	0	0	0	0	0.0055554	0.0006594
4	Miyagi	8	Wearing aparel and other textile products	7.54877	0	0.561425	0	3.02874	0.574532	0.0431041	2.05885	0.288627	0.139892	0.532684	0.284896	0.16455	0.181122	0.0146893	0	0.0322489	0	0	0.193633	0.384253	0	0.492656	0.112107	0.303165	0.12181	0.255186	0.0623162	0.289797	0	0.0720242	0.0750855	0.0156791	0.0296995	0.196684	0.573621	0.314674	0.391719	0.69563	0.0887905	0	1.3727	0.243179	0.0708081	0.013368	0.253874
4	Miyagi	9	Timber and wooden products	11.2368	0	0.19807	0	2.67112	0.413029	0	0.189113	66.3658	23.5562	89.1241	0.132339	0.0458619	0.017528	0	0	0.0374504	0	0	0.0864864	0	0	0	0.34717	0.0862198	0.601196	0.107762	0.932737	0.56953	0	0	0.206101	0	0	0.966342	3.53136	1.01323	0.0470588	0.125488	0.0374953	0	0.220384	0.0423603	0	0	0.0294822
4	Miyagi	10	Furniture and fixtures	0.109453	0	0.147593	0	0.681325	0.178875	0	0.178944	0.0703935	2.03373	0.204869	0.0350625	0.131634	0.0174148	0.0169485	0	0.0496113	0.0103261	0	0.229141	0.378532	0	0.00631582	0.340137	0.380724	0	0.0892216	0.0585852	0.0914506	0	0.0402914	0.0262525	0	0.0114223	0.133832	0.122268	0.0770145	0.129874	0.774041	0.0124177	0	0.228692	0.116907	0.0272326	0.0102826	0.214807
4	Miyagi	11	Pulp, paper, paperboard, building paper	1.2513	0	0	0	2.60925	0.647722	0.499836	0.298993	4.09522	3.78512	364.492	137.967	147.193	0	-0.0198728	0	0	0.617499	0	12.3726	1.42273	0	0	4.04441	5.55785	2.86329	0	0.636977	0.0603166	0	0	0	0.0212118	0	0.347961	0.299194	0.232207	0.0365479	0.0365474	0.131042	0	1.47197	0.0657978	0.0383176	0.0361702	0.394977
4	Miyagi	12	Paper products	33.991	0	0	0	22.0229	10.2434	0.126845	0.643398	0.0698211	0.544321	0.807856	0.0391245	0.421821	0.25334	0.0336213	0	0.0861138	0.0153633	0	4.30122	4.96318	0	0.00626446	0.869561	0.566441	1.06293	0.00589974	0.607501	0.368497	0	0	0	0.101679	0	0.0115429	0.0158183	0.79662	0.0360691	0.0257633	0.0554252	0	0.709453	0.139148	0.0270112	0.0356963	0.0871608
4	Miyagi	13	Publishing, printing	0.113413	0	0.021076	0	12.4406	0.895041	0.084461	0.526072	0.0913387	0.168543	0.065021	0.160533	12.6832	0.0307743	0.0353956	0	0.0149437	0.00995326	0	1.52674	0.514806	0	0.0121755	0.0808091	0.323397	0.259649	0.0458665	0.0179676	0.0247917	0	0.0242728	0.0430176	0.0029062	0.0137623	0.201912	0.294631	0.379121	0.35302	0.613396	0.065831	0.0025215	0.264989	0.166775	0.00262492	0.0346894	0.181168
4	Miyagi	14	Chemical fertilizer	62.0073	0	0	0	0	0.00781254	0	0	0	0	0	0	0	10.5943	0.478195	0	1.62999	0.00766707	0	0.153121	0.300307	0	0	0	0.0353355	0	0	0	0.025463	0	0	0	0	0	0	0	0	0	0	0	0	0	0	0.00808799	0	0
4	Miyagi	15	Basic inorganic chemical products	0.737457	0	0.00487824	0	5.83991	0.741806	0.105672	0.291436	0	0.014404	5.18156	0.0508462	0.00451811	2.91654	3.44344	0	2.81136	0.198125	0	9.32458	5.21976	0	0.0169088	1.27401	7.38553	2.04856	0.0690056	0.190116	0.0969131	0	0.0898906	0.0281134	0.00538135	0.326188	0.155782	1.04843	0.162002	0.203985	0.523864	0.0664897	0	0.282246	0.0417315	0.0826287	0.00458811	0.130701
4	Miyagi	16	Basic organic chemical products	0	0	0	0	0.0043492	0	0	0	0	0	0.0118656	0	0.0440823	0.487058	0	0	37.964	0.429115	0	0.67109	0.0779847	0	0	0.00379203	0.0979422	0.0556236	0	0	0.00904843	0	0	0.00415601	0	0	0	0	0	0.0205603	0	0	0	0	0	0	0	0
4	Miyagi	17	Organic chemical products	0.000613802	0	0.00012262	0	0.105997	0.104678	0.00393115	0.000200701	0.00133611	0.00168962	0.0600784	0.000589882	0.00386131	0.00468771	0.0190091	0	0.756469	0.232327	0	0.280515	0.303934	0	0.00141674	0.191928	1.15219	0.00210175	0.000400277	0.000119469	0.0703882	0	0	0	0	0	0.00430732	0.000476985	0.00086378	0.000116532	0.00104877	0.000278549	0	0.00360186	0.000839176	0.000244349	0.00046131	0.000438042
4	Miyagi	18	Synthetic resins	0	0	0	0	0	0	0.00331518	0	0.000180476	0.00484167	0.00682821	0.0013147	0.00607474	0	0	0	0	0	0	0.107493	0	0	0	1.63838	0.00428267	0	0	0	0.00533403	0	0	0	0	0	0.0143514	0.000531539	0.00146678	0	0	0.00144857	0	0.0535176	0	0.00344908	0.00137086	0.00292885
4	Miyagi	19	Synthetic fibers	0	0	0	0	0.0180548	0	0.246729	0.104381	0	0.000959331	0.0138736	0	0	0	0	0	0	0	0	0	0	0	0.000965274	0.00280668	0.00121224	0	0	0	0.0264977	0	0	0	0	0	0	0	0	0	0	0	0	0	0	0	0	0
4	Miyagi	20	Final chemical products	16.9383	0	0.214258	0	0.986918	0.329934	0.143676	0.0975835	1.80495	0.48961	0.778299	1.01877	4.01023	0.067269	0.0385103	0	0.209249	0.0563114	0	3.84047	1.05686	0.00816111	0.497256	0.715167	1.2149	0.0439098	0.29193	0.00544571	0.337016	0	0.0171657	0.0465277	0.00205526	0	0.103127	0.873311	0.676846	0.274444	1.29252	0.0423232	0.0017832	0.3947	0.0972232	0.118806	0.00350461	0.0815321
4	Miyagi	21	Medicaments	6.1522	0	0	0	0.543018	0	0	0.00345406	0	0	0	0	0	0	0	0	0	0	0	0.141535	9.72074	0	0	0	0	0	0	0	0	0	0	0	0	0	0	0	0	0	0	0	0	0	0	0	0	0
4	Miyagi	22	Petroleum refinery products	272.923	0	7.52481	0	64.3767	20.8996	2.29244	3.20563	11.6063	0.744001	83.797	4.02213	9.2924	11.4937	4.79395	0	6.54863	7.62652	0	1.72836	6.51867	4.36475	58.5957	5.6009	10.2604	7.47218	9.08522	0.903877	17.4963	0	4.87521	2.73923	1.40243	4.09242	2.63339	8.05287	4.42593	5.55115	7.41231	0.936639	0	1.28455	0.235149	1.23246	0	0.214804
4	Miyagi	23	Coal products	0	0	0.00150042	0	0	0	0	0	0	0	0	0	0	0.0254935	0.00310135	0	0.105534	0	0	0	0	0	0	0	0	0	0	0	0.0713821	0	0.111283	0.0489994	0.000827581	0.00548662	0.00319429	0.0043774	0	0.00071296	0.00213885	0	0	0	0	0	0	0
4	Miyagi	24	Plastic products	24.7542	0	0	0	31.2962	18.547	0.166681	1.15823	1.19096	1.98124	1.46953	0.43516	19.4963	0.620135	0.22011	0	0.171468	0.019467	0	7.03406	10.4142	0	0	104.572	37.2689	0.728628	0.0598051	0.0334684	0.14367	0	0	0	0	0.0430671	1.15547	1.87741	0.822736	0.737788	39.6768	0.249707	0.0197266	10.0842	0.575967	6.95477	0.290773	2.30089
4	Miyagi	25	Rubber products	4.10086	0	0.662082	0	0.409533	0.0560183	0.0630415	0.785961	0.108106	0.186184	0.11306	0.110835	0.626681	0.108167	0.0150386	0	0.264125	0.0137438	0	0.22111	0.828189	0	0.126093	0.452712	61.3336	0	0.0870844	0	0.357547	0	0.449124	0.20266	0.00802598	0	0.0929357	4.01177	0.366086	6.41653	21.213	0.322288	0.0487449	3.28992	0.547714	0.884399	0.102644	1.92334
4	Miyagi	26	Glass and glass products	0.0824738	0	0	0	3.0948	14.7668	0	0.0421363	0	2.89865	0	0	0.00953726	0	0.0957812	0	0.0116821	0	0	1.53235	5.08915	0	0	2.68028	0.869601	1.78708	0.0672293	0	0.0861361	0	0	0	0	0	0.668638	0.831171	0.279793	0.0880754	0.0880742	0	0.00985577	0.0824942	0.0440454	0.02052	0.029055	0.0275895
4	Miyagi	27	Cement and cement products	0.00685819	0	0	0	0	0	0	0	0	0	0	0	0	0	0	0	0	0	0	0	0	0	0.00527656	0	0	0	9.43928	0	0.0238758	0	0	0.0065798	0	0	0	0	0.00459584	0	0	0	0	0	0	0	0	0
4	Miyagi	28	Pottery, china and earthenware	0	0	0	0	0.255182	0.0111062	0	0	0	0.249873	0	0	0	0	0.0119263	0	0	0	0	0	0	0	0	0.0404529	0	0	0.0627833	0.371026	0	0	0	0	0	0	0	0	0.0348386	0.0438671	0.0438665	0	0	1.28398	0	0.0229956	0	0.226732
4	Miyagi	29	Other ceramic, stone and clay products	4.33681	0	0	0	0.579942	0	0	0	0.0362878	0.135208	1.18038	0	0.00848217	0.0389018	1.45761	0	0.0311691	0.0519005	0	0.124766	0.460433	0	1.28034	0.200654	0.215276	1.3343	6.17849	0.651373	2.9781	0	0.0843789	1.03799	0	4.09525	1.4233	2.44032	1.25342	10.0265	3.8208	0.457694	0	1.17389	0.360389	0.894247	0.0258407	0.139045
4	Miyagi	30	Pig iron and crude steel	0	0	0	0	0	0	0	0	0	0	0	0	0	0	0	0	0	0	0	0	0	0	0	0	0	0	0	0	0	0	195.561	5.13427	1.27254	0	0	-0.90062	-1.61869	-1.14261	-3.58219	-0.0184541	0	-0.274782	0	-0.0161884	-0.0152811	-0.0290207
4	Miyagi	31	steel products	0.405086	0	0.118015	0	0	0	0.0219123	0	0.0334009	1.63447	0	0	0	0	0	0	0	0	0	0	0	0	0	0.753536	4.13178	0	5.30171	0	0.343748	0	46.0793	3.75688	20.8949	0	0.134596	93.0604	51.7977	35.9138	50.7977	3.33195	0.0161362	13.7989	0.656225	2.10815	0.214064	0.466762
4	Miyagi	32	Cast and forged steel products	0.115965	0	0.00827378	0	0	0	0	0	0	0.0488601	0	0	0	0	0	0	0	0	0	0	0	0	0	0	0	0	0.0180058	0.0564282	0.0346042	0	0	0.206622	0	0	0.158529	7.68404	1.2073	30.4139	20.1446	4.01274	0.0079189	5.70764	0.530843	0.206093	0.0077817	0.0221676
4	Miyagi	33	Other iron or steel products	0	0	0	0	0	0	0	0	0	3.03706	0	0	0	0	0	0	0	0	0	0.0220728	0	0	0	0.0276886	0	0	0.83654	0.0205216	0.275291	0	0	0.161847	0	0	0.302678	77.4267	40.0292	26.7727	16.4437	0.562204	0.0100797	3.63722	0	1.05981	0.247626	0.159893
4	Miyagi	34	Non-ferrous metals	0	0	0	0	0	0	0.00063737	0	0	0.00180998	0	0	-0.00953799	0	0.0832448	0	0.0108485	0	0	0.181538	0	0	0	0.0045126	-0.000640404	0.0232465	0	0.012542	0.0169209	0	0.00338865	0.00671209	-0.000405726	0.914547	2.59176	-0.0325484	0.151011	-0.0010486	0.0531282	0.00208874	0	0.07006	0.00346098	0.668052	0.00034592	0.00164236
4	Miyagi	35	Non-ferrous metal products	0	0	0	0	5.82648	2.65941	0.0212824	0	0.0851569	1.17248	0	0.00984657	1.94502	0	0	0	0	0	0	0.218788	0.687327	0	0	1.1301	1.52893	0.0131563	0	0.0358962	0.462276	0	0	0	0	0.269449	8.14428	132.389	15.9552	36.2508	40.9537	3.23617	0.0235085	23.7435	4.11832	21.9031	0.473574	3.61944
4	Miyagi	36	Metal products for construction and architecture	0.0716009	0	0	0	0	0	0	0	0.0101207	0.140784	0	0	0	0	0	0	0	0	0	0	0	0	0	0	0	0	0.111174	0	0	0	0	0	0	0	0.0217513	10.2836	0.390707	0.582583	0	0.0812329	0	0	0	0	0	0.00912469
4	Miyagi	37	Other metal products	2.3069	0	2.0357	0	8.95139	23.1643	0.0139622	0.487927	1.08541	2.62214	0.446794	0.0602913	0.194014	0	0.349722	0	0.444823	0.0710248	0	2.47104	3.59714	0	0.167559	0.569579	15.3567	0.241671	2.02222	0.277361	0.994062	0	0.00494876	0.273432	0	0.140294	0.628925	25.9919	10.9619	17.4933	33.3169	1.35437	0.071972	7.46327	1.70011	0.604744	0.176813	0.901833
4	Miyagi	38	General industrial machinery	0.0417909	0	0.153058	0	0	0	0	0	0	0.0171188	0	0	0	0	0	0	0	0	0	0	0	0	0.00401914	0.908478	0	0	0	0.0237245	0.0945678	0	0	0.0367533	0.00767471	0.0109031	0.0407313	0.111635	0.115521	70.8417	25.8119	0.316085	0.0233058	1.09612	0.27675	0.0173298	0.0523474	0.040387
4	Miyagi	39	Special industrial machinery	0	0	0	0	0	0	0	0	0	0	0	0	0	0	0	0	0	0	0	0	0	0	0	0	0	0	0	0	0	0	0	0	0	0	0	0	0	1.02863	161.778	0	0	0	0	0.03784	0	0
4	Miyagi	40	Other general machines	0	0	0.318763	0	0	0	0	0	0.020593	0.456967	0	0	0	0	0	0	0	0	0	0.00726192	0	0	0	0.133606	0	0	0	0.121528	0.152158	0	0	0.0665594	0	0	0.177032	0.316731	0.223153	7.92901	21.2645	5.22622	0.00663241	2.4673	0.717293	0.138089	0.05214	0.185663
4	Miyagi	41	Machinery for office and service industry	0	0	0	0	0	0	0	0	0	0	0	0	0	0	0	0	0	0	0	0	0	0	0	0	0	0	0	0	0	0	0	0	0	0	0	0	0	0	0	0	0.415548	0	0	0	0	0
4	Miyagi	42	Industrial electric equipment	0.157261	0	0.00785405	0	0	0	0	0	0.00778004	0.0154605	0	0	0	0	0	0	0	0	0	0	0	0	0	0.00688315	0	0	0	0	0	0	0	0	0	0	0	1.80255	0.0474229	38.3355	34.0133	0.133812	0.0676545	83.3338	2.79504	1.03297	0.243769	1.03111
4	Miyagi	43	Applied electric equipment and electric mesuring instruments	0	0	0	0	0	0	0	0	0	0	0	0	0	0	0	0	0	0	0	0	0	0	0	0	0	0	0	0	0	0	0	0	0	0	0	0	0	0.123074	2.46868	0.0173051	0	2.40721	3.05639	0	0	0
4	Miyagi	44	Other electric equipment	0.12846	0	0.00641564	0	0.00644869	0	0	0	0	0.0442016	0	0	0	0	0	0	0	0	0	0.0672328	0	0	0	0.00562256	0	0	0	0	0	0	0	0	0	0	0.00682923	0	0.148495	1.99985	7.27373	0.0510091	0.00614046	3.34649	0.900088	4.94127	0.084477	0.544324
4	Miyagi	45	Household electric and electric applications	0	0	0	0	0	0	0	0	0	0	0	0	0	0	0	0	0	0	0	0	0	0	0	0	0	0	0	0	0	0	0	0	0	0	0	0	0	0	0	0	0	0	0	0	0.00977005	0
4	Miyagi	46	Communication equipment	0.0417412	0	0	0	0	0.0200636	0	0	0	0	0	0	0.0193078	0	0	0	0	0	0	0	0.27685	0	0	0	0.0362984	0	0	0	0	0	0	0	0	0	0.0221906	0.0810926	0	0.217928	0.099057	0	0	0.0185562	0.0356672	0	0	1.26602
4	Miyagi	47	Electric computing equipment and accessory equipment	0	0	0	0	0	0	0	0	0	0	0	0	0	0	0	0	0	0	0	0	0	0	0	0	0	0	0	0	0	0	0	0	0	0	0	0	0	0	0.0725731	0	0	0	0	0	0	0.00310006
4	Miyagi	48	Semiconductor devices and integrated circuits	0	0	0	0	0	0	0	0	0	0	0	0	0	0	0	0	0	0	0	0	0	0	0	0	0	0	0	0	0	0	0	0	0	0	0	0	0.0143265	0.0281862	0.507345	0.00808491	0.0102192	1.6537	2.19722	0.00118204	0.0725268	0.722591
4	Miyagi	49	Other electrical equipment	0	0	0	0	0	0	0	0	0	0	0	0	2.65871	0	0	0	0	0	0	0	0.0295984	0	0	0	0	0	0	0	0	0	0	0	0	0	0.099642	0.030344	1.97822	5.30793	89.7592	0.177202	0.537556	63.2418	81.4125	0.0310891	3.02272	40.7409
4	Miyagi	50	Passenger motor cars	0	0	0	0	0	0	0	0	0	0	0	0	0	0	0	0	0	0	0	0	0	0	0	0	0	0	0	0	0	0	0	0	0	0	0	0	0	0	0	0	0	0	0	0	0	0
4	Miyagi	51	Other cars	0	0	0	0	0	0	0	0	0	0	0	0	0	0	0	0	0	0	0	0	0	0	0	0	0	0	0	0	0	0	0	0	0	0	0	0	0	0	0	0	0	0	0	0	0	0
4	Miyagi	52	Motor vheicle parts and accessories	0	0	0	0	0	0	0	0	0	0	0	0	0	0	0	0	0	0	0	0	0	0	0	0	0	0	0	0	0	0	0	0	0	0	0	0	0	0	0.00492646	0	0	0	0	0	0	0
4	Miyagi	53	Other transportation equipment	3.27549	0	0.0036192	0	0	0	0	0	0	0	0	0	0	0	0	0	0	0	0	0	0	0	0	0	0	0	0	0	0	0	0	0	0	0	0	0	0	0	0	0	0	0	0	0	0	0
4	Miyagi	54	Precision instruments	0.252255	0	0	0	0.00744896	0	0	0	0	0	0.0541933	0.0118836	0	0	0	0	0	0	0	0.00776615	0.0210894	0	0	0.0389682	0.0129037	0	0	0.00722036	0.00774872	0	0	0	0	0	0	0.0216206	0	2.47908	9.66967	0	0	0.850953	0.120453	0	0	0.0926587
4	Miyagi	55	Miscellaneous manufacturing products	2.32034	0	0.675665	0	0.536998	0.400755	0.00680753	5.73528	0.326867	0.804203	0.107725	0.0566927	0.0436594	0.00834314	0	0	0	0	0	0.0082333	0	0	0.045387	0.0826244	0.0273597	0.227246	0.00854891	0.260259	0.0164297	0	0	0.158472	0	0	0.610502	0.20629	0.0237191	0.261326	0.716771	0.00892365	0	0.0699333	0.13442	0.00782801	0	0.0561328
4	Miyagi	56	Reuse and recycling	0.161727	0	0	0	0.222051	0.474395	0.0047854	0	0	0	3.05806	0	0	0.611412	0.0684937	0	0.01723	0	0	0.00144691	0	0.006048	0	2.16353	0.00360613	0.171577	0.253902	0.102237	0.00721833	0	0.268414	0.578212	0.140126	1.56371	0.367429	0	0.00138946	0	0	0	0	0	0	0	0	0
4	Miyagi	57	Building construction and repair of construction	0	0	0	0	0	0	0	0	0	0	0	0	0	0	0	0	0	0	0	0	0	0	0	0	0	0	0	0	0	0	0	0	0	0	0	0	0	0	0	0	0	0	0	0	0	0
4	Miyagi	58	Public construction	0	0	0	0	0	0	0	0	0	0	0	0	0	0	0	0	0	0	0	0	0	0	0	0	0	0	0	0	0	0	0	0	0	0	0	0	0	0	0	0	0	0	0	0	0	0
4	Miyagi	59	Other civil enginnering and construction	0	0	0	0	0	0	0	0	0	0	0	0	0	0	0	0	0	0	0	0	0	0	0	0	0	0	0	0	0	0	0	0	0	0	0	0	0	0	0	0	0	0	0	0	0	0
4	Miyagi	60	Electricity	0.0506291	0	0.00586564	0	0.0570144	0.00988686	0.00603023	0.00539714	0.010867	0.00129506	0.0361266	0.00260567	0.0133613	0.00430973	0.00645532	0	0.0118879	0.00262034	0	0.00488429	0.0104815	0.00062498	0.00206976	0.0358171	0.0102823	0.00295503	0.00436427	0.000478817	0.0113545	0	0.0207553	0.0092732	0.00132909	0.000910962	0.00410063	0.018084	0.0124757	0.0116008	0.0287002	0.00340318	1.51731e-05	0.00860784	0.0015596	0.00906659	0.000134192	0.00069375
4	Miyagi	61	Gas supply and heat supply	1.24272e-05	0	4.13767e-06	0	0.00365159	0.000848215	4.66075e-05	2.70896e-05	2.04934e-05	1.22173e-05	0.00302956	4.97621e-05	3.06577e-05	0.000259242	4.27626e-05	0	0.000107963	0.000801156	0	6.50412e-05	0.000781065	0	1.91225e-05	0.000645461	0.000511521	0.000496448	4.50229e-05	4.03135e-05	9.08533e-05	0	0.000754818	0.000214609	9.1288e-06	8.6459e-06	0.000136537	0.000515049	0.000353931	0.000306714	0.000365692	5.16962e-05	0	0.000265179	2.8317e-05	0.000247358	0	3.6953e-06
4	Miyagi	62	Water supply and waste management services	0.00106187	0	0.000245407	0	0.00288062	0.00096877	8.64974e-05	5.44644e-05	0.000103006	2.04694e-05	0.00156267	3.66842e-05	0.000319748	0.000282691	0.000141859	0	0.000467154	0.000106073	0	0.00067127	0.000528711	0	2.88347e-05	0.000397334	0.0003585	5.34708e-05	0.000782995	2.02628e-05	0.000260947	0	0.000164788	7.19129e-05	4.58842e-05	2.60742e-05	0.0001284	0.000566299	0.00020929	0.000324139	0.00130444	0.000250392	0	0.000303599	3.20242e-05	0.000203072	3.91206e-06	2.22885e-05
4	Miyagi	63	Commerce	49.3538	0	1.19187	0	74.9379	12.4895	1.67782	6.60109	3.79988	2.54661	13.3973	0.409548	16.8551	0.797703	0.576218	0	2.12478	0.0851398	0	6.69995	1.49796	0.073121	1.7281	16.1362	2.89204	0.947781	3.95973	0.172398	2.30045	0	1.33805	0.958809	2.16923	0.896436	2.67246	17.9349	5.04632	19.4874	41.3063	2.67338	0.067103	14.4903	2.65325	4.82667	0.257482	1.39839
4	Miyagi	64	Financial and insurance	0.709603	0	0.127103	0	0.206798	0.11683	0.0351894	0.118555	0.0307689	0.022314	0.118958	0.00322039	0.164427	0.0144074	0.00820998	0	0.0256185	0.00109596	0	0.0876445	0.0170184	0.0019549	0.00340319	0.0463866	0.0226906	0.0189326	0.108778	0.00339159	0.0285582	0	0.0149671	0.00797308	0.0112248	0.0279763	0.0176721	0.263616	0.0398814	0.101451	0.268045	0.0499805	0.000256287	0.105669	0.00855191	0.0340613	0.00109133	0.0110006
4	Miyagi	65	Real estate agencies and rental services	0.0161763	0	0.0187881	0	0.0659083	0.0224221	0.00520943	0.0170673	0.00353611	0.00998567	0.0278221	0.00120511	0.0790011	0.00259372	0.00213592	0	0.00660747	0.000532368	0	0.0171295	0.0135449	0	0.00369029	0.0439632	0.0107956	0.00241527	0.0282124	0.000732214	0.00942954	0	0.00484689	0.00523336	0.00227984	0.00392589	0.00839971	0.0937311	0.0190963	0.0449953	0.101774	0.0189925	0	0.0540179	0.00578612	0.0233998	0.000530122	0.0028525
4	Miyagi	66	House rent	0	0	0	0	0	0	0	0	0	0	0	0	0	0	0	0	0	0	0	0	0	0	0	0	0	0	0	0	0	0	0	0	0	0	0	0	0	0	0	0	0	0	0	0	0	0
4	Miyagi	67	Transport	59.8845	0.00218065	15.9185	0	20.2766	2.29114	0.601552	1.41557	1.92441	0.896842	6.34972	0.139158	3.995	0.548747	0.301678	0	1.69379	0.0204915	0	1.83952	0.465856	0.198707	1.5245	1.67145	0.429272	0.654992	10.6855	0.0422757	0.715598	0	0.585128	0.67062	0.208869	0.517216	1.54519	8.79803	2.57429	5.28949	9.98653	1.07305	0.0113263	2.33144	0.197406	0.465737	0.0537951	0.551331
4	Miyagi	68	Communication	0.142479	0	0.0310886	0	0.11562	0.0319153	0.0164618	0.0455136	0.00889651	0.0169992	0.0495734	0.00221564	0.184598	0.00550232	0.00571197	0	0.00548625	0	0	0.0637106	0.194636	0	0.0095785	0.0774982	0.0415007	0.0111014	0.0334523	0.00134621	0.0234767	0	0.0101843	0.00729928	0.00304843	0.00505254	0.0724362	0.470629	0.060833	0.181537	0.218629	0.034134	0	0.170033	0.0325051	0.0323522	0.0019493	0.0222118
4	Miyagi	69	Broadcasting	0	0	0	0	0	0	0	0	0	0	0	0	0	0	0	0	0	0	0	0	0	0	0	0	0	0	0	0	0	0	0	0	0	0	0	0	0	0	0	0	0	0	0	0	0	0
4	Miyagi	70	Information services	0.0473403	0	0.000559128	0	0.0313119	0.0215249	0.00110736	0.00339917	0.00166158	0.00377358	0.0173042	0.00032021	0.0193084	0.00262949	0.000577855	0	0.00371524	0.000150886	0	0.0121373	0.0124261	0	0.000922872	0.0176404	0.00486777	0.00273819	0.00686622	0.000466937	0.00459347	0	0.00220778	0.00107409	0.0020266	0.00158559	0.00569665	0.0267988	0.0125395	0.0378029	0.110143	0.00852807	0.000152899	0.0547463	0.0150327	0.0245918	0.00015025	0.00542151
4	Miyagi	71	﻿Internet based services	5.67593e-05	0	2.83472e-05	0	0.000332421	9.0941e-05	1.63748e-05	0.000123728	1.87201e-05	4.65007e-05	7.77362e-05	0	0.000516339	1.00343e-05	9.76557e-06	0	1.07196e-05	0	0	9.90217e-05	0.000322678	0	1.09174e-05	0.000289835	4.93582e-05	2.02451e-05	7.19723e-05	0	2.96399e-05	0	8.70584e-06	1.81518e-05	0	9.87219e-06	0.000160931	0.000781072	0.000133125	0.000251437	0.000377151	5.36623e-05	0	0.000496241	8.89167e-05	8.47326e-05	0	5.06331e-05
4	Miyagi	72	Image information production and distribution industry	0.0428289	0	0.0157957	0	0.075416	0.0139354	0.0273732	0.0710981	0.00521561	0.0110122	0.0324872	0.00158307	0.0566897	0.0524186	0.00612178	0	0.0074665	0	0	0.0544873	0.0362104	0	0.00532297	0.0536419	0.0532879	0.0119861	0.0601567	0.00256497	0.0440426	0	0.00545746	0.00505727	0.00363015	0.00687625	0.00910756	0.134409	0.0602715	0.0581691	0.0988236	0.0201837	0	0.178095	0.0163277	0.0419687	0.00123802	0.0264505
4	Miyagi	73	Public administration	0	0	0	0	0	0	0	0	0	0	0	0	0	0	0	0	0	0	0	0	0	0	0	0	0	0	0	0	0	0	0	0	0	0	0	0	0	0	0	0	0	0	0	0	0	0
4	Miyagi	74	Education and Research	0.0149829	0	0.00139387	0	0.118647	0.0532366	0.0041318	0.00996631	0.00109006	0.00678729	0.0744361	0.000588194	0.0065228	0.0293702	0.0170592	0	0.0562608	0.00478107	0	0.395622	0.220392	0.000642701	0.00398378	0.184906	0.0547993	0.0469184	0.0508495	0.00428859	0.100409	0	0.0141266	0.0121903	8.09277e-05	0.0104239	0.0544294	0.150034	0.0177922	0.217384	1.37484	0.0058328	0.00161495	0.609586	0.0938862	0.160955	0.00724484	0.0478939
4	Miyagi	75	Medical service, health and social security and nursing care	0.0206227	0	0.00562959	0	0.043211	0.0219187	0.00133034	0.00743429	0.00164761	0.00138521	0.0132158	0.000205166	0.013509	0.00163043	0.00132231	0	0.00348357	0.000120846	0	0.0197098	0.00970939	0.000560446	0.00133044	0.0117735	0.0051239	0.00164477	0.00891008	0.000249315	0.00294315	0	0.00212186	0.00110603	0.00169369	0.000401023	0.00177051	0.027249	0.00901291	0.0121592	0.0674828	0.0152589	0.000122457	0.0136665	0.00153233	0.0019122	0.000120336	0.00262812
4	Miyagi	76	Advertising and survery	0.00948927	0	0.00777718	0	0.35373	0.341152	0.00463288	0.019293	0.00288896	0.015668	0.0540956	0.00233832	0.0210464	0.00593603	0.00339089	0	0.00344645	0.000229551	0	0.933059	0.0908335	0	0.000421203	0.0610226	0.0141764	0.00299412	0.0107104	0.00142075	0.00991065	0	0.00403056	0.00210094	0.00160861	0.00444359	0.00633825	0.0843767	0.0113728	0.0597056	0.111557	0.0089715	0.000348919	0.0786371	0.0140338	0.0144081	0.00160008	0.012372
4	Miyagi	77	Giids rental and leasing services	2.77511	0	0.396553	0	3.18877	0.838886	0.234739	0.424142	0.178906	0.197083	0.778809	0.0220358	1.76366	0.0416943	0.0486933	0	0.160351	0.00741681	0	0.608952	0.115457	0	0.426419	1.92691	0.734915	0.180862	1.54656	0.0382538	1.65033	0	0.14108	0.101822	0.116942	0.0615312	0.359426	2.4284	1.40661	2.82088	8.45505	1.50286	0.00751573	5.57083	0.272061	0.602448	0.029542	0.455845
4	Miyagi	78	Other business services	3.13378	0	0.52033	0	3.12565	0.699709	0.0917744	0.611814	0.192521	0.166998	0.708746	0.0305057	3.2058	0.107016	0.104151	0	0.368642	0.00874133	0	0.929993	0.307267	0.00450441	0.13188	1.71408	0.433303	0.399884	1.22076	0.0150284	0.566636	0	0.0956908	0.204455	0.0442405	0.197683	0.378735	2.83907	0.598135	1.55287	3.60409	0.398283	0.00590527	2.01739	0.294696	0.461062	0.0261133	0.281024
4	Miyagi	79	Personal services	0.212269	0	0.00378618	0	0.072308	0.0145758	0	0.00774637	0.00187525	0	0.0207656	0	0.0298067	0	0	0	0.00214764	0	0	0.0138871	0.00359153	0	0	0.0199089	0.00494437	0	0.00617974	0	0.00197941	0	0	0	0	0.00395572	0.00403026	0.031297	0.00762034	0.0233882	0.0359814	0.00430042	0	0.0438123	0.00323894	0.0113173	0	0.00169069
4	Miyagi	80	Activities not elsewhere classified	0	0	0	0	0	0	0	0	0	0	0	0	0	0	0	0	0	0	0	0	0	0	0	0	0	0	0	0	0	0	0	0	0	0	0	0	0	0	0	0	0	0	0	0	0	0
5	Akita	1	Agriculture, forestry and fishery	196.326	0	0.00357621	0	404.331	8.99013	1.45019	0.0117068	43.5233	0	0.441314	0	0	0.0189885	0.0258719	0	0.0486849	0	0	0.0562154	0.481714	0	0.0454511	0	5.626	0	0	0	0.00373928	0	0	0	0	0	0	0	0	0	0	0	0	0	0	0	0	0
5	Akita	2	Metallic ores	0	0	0	0	0	0	0	0	0	0	0	0	0	0	0	0	0	0	0	0	0	0	0	0	0	0	0	0	0	0	0	0	0	0	0	0	0	0	0	0	0	0	0	0	0	0
5	Akita	3	Non-metallic ores	0.0202965	0	0.00617015	0	0	0	0	0	0	0	0.161146	0	0	0.0795634	0.0756108	0	0.00599983	0	0	0.00277115	0.00418067	-0.00386107	0.570314	0	0.0107435	0.302167	3.37133	0.0798684	0.646994	0	0	0.00423318	0	0.0174975	0.00281482	0.00600037	0.00177407	0	0	0.00200234	0	0	0	0	0	0
5	Akita	4	Coal mining, crude petroleum and natural gas	0	0	0	0	5.73068e-05	0	0	0	0	0	0.0401289	0	0	0.0257312	5.89227e-05	0	0.0049803	0.000161549	0	0.000119494	5.4082e-05	0.135358	0	0	0	0.00256522	0.000620372	0.000944317	0.00393445	0	0.00493769	0	0	0.000178698	0	0.000110889	0	0	0.000270908	0	0	0.000202995	0	0	0	0
5	Akita	5	Food and Tobacco	63.8171	0	0	0	95.4854	7.56912	-0.00151601	0.0672978	0.00693257	0	0.59335	0.00140281	0	0.00557396	0.00361646	0	0.0337431	0	0	0.100844	0.853074	0	0	0.00766672	0	0	0	0.00340934	0.0292706	0	0	0	0	0	0	0	0	0	0	0	0	0	0	0	0	0
5	Akita	6	Beverage	0.537071	0	0	0	0.790552	8.31993	0	0	0	0	0	0	0	0	0	0	0	0	0	0	0.0194063	0	0	0	0	0	0	0	0	0	0	0	0	0	0	0	0	0	0	0	0	0	0	0	0	0
5	Akita	7	Textile products	0.451782	0	0	0	0.00388792	0.00620447	2.0232	8.167	0.014049	0.0989825	0.226286	0.00310125	0.0394069	0.0177994	0	0	0	0	0	0	0	0	0	0.044068	1.43679	0.00138122	0	0	0.00943687	0	0	0	0	0	0.0205867	0.0250771	0.01038	0.00735187	0.8283	0	0	0	0	0	0.00970119	0.00115148
5	Akita	8	Wearing aparel and other textile products	23.7525	0	1.76655	0	9.53006	1.80779	0.135629	6.47827	0.908177	0.440178	1.67611	0.896438	0.517765	0.56991	0.0462207	0	0.101472	0	0	0.609274	1.20907	0	1.55017	0.352748	0.953923	0.383282	0.802953	0.196081	0.911861	0	0.226627	0.23626	0.0493351	0.0934507	0.618875	1.80492	0.990135	1.23256	2.18883	0.279384	0	4.31926	0.765173	0.222801	0.0420629	0.798826
5	Akita	9	Timber and wooden products	12.9119	0	0.227597	0	3.06932	0.4746	0	0.217305	76.2592	27.0678	102.41	0.152067	0.0526987	0.020141	0	0	0.0430333	0	0	0.0993793	0	0	0	0.398924	0.0990729	0.690818	0.123827	1.07178	0.654431	0	0	0.236825	0	0	1.1104	4.05779	1.16428	0.054074	0.144195	0.0430848	0	0.253237	0.0486751	0	0	0.0338773
5	Akita	10	Furniture and fixtures	0.0928717	0	0.125234	0	0.57811	0.151777	0	0.151836	0.0597295	1.72563	0.173833	0.0297508	0.111693	0.0147766	0.0143809	0	0.0420956	0.00876182	0	0.194428	0.321187	0	0.00535902	0.288609	0.323047	0	0.0757053	0.0497101	0.0775966	0	0.0341876	0.0222754	0	0.00969196	0.113558	0.103745	0.0653474	0.1102	0.65678	0.0105365	0	0.194047	0.099197	0.0231071	0.00872485	0.182265
5	Akita	11	Pulp, paper, paperboard, building paper	0.251598	0	0	0	0.524642	0.130237	0.100502	0.0601185	0.823426	0.761075	73.2883	27.7411	29.5961	0	-0.00399582	0	0	0.124161	0	2.48775	0.286069	0	0	0.81321	1.11752	0.575722	0	0.128077	0.0121279	0	0	0	0.00426506	0	0.0699645	0.0601589	0.0466898	0.00734869	0.00734859	0.0263487	0	0.29597	0.01323	0.00770453	0.00727274	0.079418
5	Akita	12	Paper products	19.4676	0	0	0	12.6131	5.86669	0.0726478	0.368491	0.0399884	0.311747	0.462681	0.0224077	0.241588	0.145095	0.0192558	0	0.0493197	0.00879895	0	2.46343	2.84255	0	0.00358782	0.498021	0.324416	0.60877	0.00337894	0.347932	0.211048	0	0	0	0.0582343	0	0.00661095	0.00905954	0.456245	0.0206577	0.0147553	0.0317435	0	0.406323	0.0796938	0.01547	0.0204442	0.0499193
5	Akita	13	Publishing, printing	0.00351767	0	0.000653702	0	0.385864	0.027761	0.00261968	0.0163169	0.002833	0.00522761	0.00201672	0.00497915	0.393387	0.000954507	0.00109785	0	0.0004635	0.000308714	0	0.0473539	0.0159674	0	0.00037764	0.00250641	0.0100306	0.00805337	0.00142262	0.000557291	0.00076895	0	0.000752854	0.00133425	9.014e-05	0.000426859	0.00626259	0.0091384	0.011759	0.0109494	0.0190253	0.00204184	7.82079e-05	0.00821901	0.00517276	8.14157e-05	0.00107594	0.0056192
5	Akita	14	Chemical fertilizer	42.3902	0	0	0	0	0.00534091	0	0	0	0	0	0	0	7.24258	0.32691	0	1.11432	0.00524146	0	0.104679	0.205299	0	0	0	0.0241565	0	0	0	0.0174073	0	0	0	0	0	0	0	0	0	0	0	0	0	0	0.00552922	0	0
5	Akita	15	Basic inorganic chemical products	0.23777	0	0.00157284	0	1.8829	0.239172	0.0340706	0.0939644	0	0.00464413	1.67063	0.0163938	0.00145672	0.940348	1.11023	0	0.906435	0.0638791	0	3.00642	1.68295	0	0.00545171	0.410765	2.38123	0.660495	0.0222487	0.0612968	0.0312466	0	0.0289824	0.00906429	0.00173505	0.105169	0.0502269	0.338032	0.0522325	0.0657686	0.168903	0.0214375	0	0.0910014	0.013455	0.026641	0.00147929	0.0421404
5	Akita	16	Basic organic chemical products	0	0	0	0	0.000125749	0	0	0	0	0	0.000343072	0	0.00127456	0.0140823	0	0	1.09766	0.0124071	0	0.0194033	0.00225478	0	0	0.000109639	0.00283181	0.00160825	0	0	0.000261618	0	0	0.000120163	0	0	0	0	0	0.000594463	0	0	0	0	0	0	0	0
5	Akita	17	Organic chemical products	0.0013692	0	0.000273528	0	0.236446	0.233505	0.0087692	0.000447702	0.00298046	0.00376903	0.134016	0.00131585	0.0086134	0.0104569	0.0424035	0	1.68745	0.518251	0	0.625744	0.677984	0	0.00316032	0.428132	2.57018	0.00468837	0.000892896	0.000266499	0.157015	0	0	0	0	0	0.00960832	0.00106401	0.00192683	0.000259947	0.00233949	0.000621358	0	0.00803465	0.00187194	0.000545068	0.00102904	0.000977137
5	Akita	18	Synthetic resins	0	0	0	0	0	0	0.00317118	0	0.000172637	0.00463136	0.0065316	0.00125759	0.00581087	0	0	0	0	0	0	0.102824	0	0	0	1.56721	0.00409663	0	0	0	0.00510233	0	0	0	0	0	0.013728	0.00050845	0.00140307	0	0	0.00138565	0	0.0511929	0	0.00329926	0.00131131	0.00280163
5	Akita	19	Synthetic fibers	0	0	0	0	0.0164296	0	0.22452	0.0949855	0	0.000872976	0.0126247	0	0	0	0	0	0	0	0	0	0	0	0.000878384	0.00255403	0.00110312	0	0	0	0.0241125	0	0	0	0	0	0	0	0	0	0	0	0	0	0	0	0	0
5	Akita	20	Final chemical products	5.91739	0	0.0748511	0	0.34478	0.115263	0.0501934	0.0340908	0.630562	0.171045	0.271899	0.355907	1.40097	0.0235004	0.0134536	0	0.0731014	0.0196724	0	1.34167	0.369215	0.00285109	0.173716	0.249844	0.424425	0.0153399	0.101986	0.00190246	0.117737	0	0.00599683	0.0162545	0.000718006	0	0.0360276	0.305091	0.236456	0.095877	0.451544	0.0147856	0.000622962	0.137889	0.033965	0.0415049	0.00122434	0.0284833
5	Akita	21	Medicaments	2.14002	0	0	0	0.188887	0	0	0.00120148	0	0	0	0	0	0	0	0	0	0	0	0.0492325	3.38133	0	0	0	0	0	0	0	0	0	0	0	0	0	0	0	0	0	0	0	0	0	0	0	0	0
5	Akita	22	Petroleum refinery products	0.210366	0	0.00580006	0	0.049621	0.0161092	0.00176699	0.00247087	0.00894604	0.000573469	0.06459	0.00310022	0.0071625	0.00885921	0.00369513	0	0.00504762	0.00587845	0	0.0013322	0.00502454	0.00336431	0.0451651	0.00431713	0.00790862	0.00575949	0.0070028	0.0006967	0.013486	0	0.00375777	0.00211137	0.00108098	0.0031544	0.00202979	0.00620708	0.00341147	0.00427877	0.00571334	0.000721953	0	0.000990121	0.00018125	0.000949968	0	0.000165569
5	Akita	23	Coal products	0	0	2.13005e-05	0	0	0	0	0	0	0	0	0	0	0.000361915	4.40279e-05	0	0.00149821	0	0	0	0	0	0	0	0	0	0	0	0.00101337	0	0.00157982	0.000695614	1.17486e-05	7.78901e-05	4.53473e-05	6.21432e-05	0	1.01214e-05	3.03639e-05	0	0	0	0	0	0	0
5	Akita	24	Plastic products	7.20102	0	0	0	9.1041	5.39534	0.0484876	0.33693	0.346451	0.576346	0.427487	0.126589	5.67151	0.180398	0.0640303	0	0.0498802	0.00566297	0	2.04622	3.0295	0	0	30.42	10.8416	0.211959	0.0173974	0.00973599	0.0417937	0	0	0	0	0.0125283	0.336128	0.546141	0.239335	0.214623	11.542	0.0726399	0.0057385	2.93351	0.167549	2.02315	0.0845861	0.669331
5	Akita	25	Rubber products	0.816258	0	0.131784	0	0.0815158	0.0111502	0.0125481	0.156442	0.021518	0.0370592	0.0225042	0.0220611	0.124738	0.0215302	0.00299337	0	0.052573	0.00273564	0	0.0440111	0.164847	0	0.0250982	0.0901104	12.2082	0	0.0173338	0	0.0711682	0	0.0893961	0.0403385	0.00159754	0	0.0184984	0.798524	0.0728679	1.27718	4.22235	0.06415	0.00970246	0.654844	0.10902	0.176036	0.0204308	0.382832
5	Akita	26	Glass and glass products	0.0433046	0	0	0	1.62499	7.75361	0	0.0221246	0	1.522	0	0	0.00500774	0	0.0502919	0	0.00613391	0	0	0.804595	2.67217	0	0	1.40734	0.456603	0.938346	0.0353002	0	0.0452276	0	0	0	0	0	0.351082	0.436424	0.146911	0.0462459	0.0462452	0	0.00517498	0.0433153	0.023127	0.0107745	0.015256	0.0144865
5	Akita	27	Cement and cement products	0.00113445	0	0	0	0	0	0	0	0	0	0	0	0	0	0	0	0	0	0	0	0	0	0.000872824	0	0	0	1.5614	0	0.00394942	0	0	0.0010884	0	0	0	0	0.000760224	0	0	0	0	0	0	0	0	0
5	Akita	28	Pottery, china and earthenware	0	0	0	0	0.0223132	0.00097113	0	0	0	0.0218489	0	0	0	0	0.00104283	0	0	0	0	0	0	0	0	0.00353721	0	0	0.00548978	0.0324426	0	0	0	0	0	0	0	0	0.00304629	0.00383575	0.00383569	0	0	0.112271	0	0.00201074	0	0.0198255
5	Akita	29	Other ceramic, stone and clay products	0.893697	0	0	0	0.11951	0	0	0	0.00747793	0.0278627	0.243245	0	0.00174794	0.00801659	0.300374	0	0.00642309	0.0106953	0	0.0257109	0.0948827	0	0.263844	0.0413492	0.0443624	0.274961	1.27322	0.13423	0.613704	0	0.0173882	0.213902	0	0.843919	0.293303	0.502882	0.258294	2.06618	0.787361	0.0943181	0	0.241906	0.0742663	0.18428	0.00532506	0.0286534
5	Akita	30	Pig iron and crude steel	0	0	0	0	0	0	0	0	0	0	0	0	0	0	0	0	0	0	0	0	0	0	0	0	0	0	0	0	0	0	4.56704	0.119904	0.0297183	0	0	-0.0210327	-0.0378021	-0.0266841	-0.0836569	-0.00043097	0	-0.00641715	0	-0.000378056	-0.000356868	-0.000677737
5	Akita	31	steel products	0.0162279	0	0.00472772	0	0	0	0.000877812	0	0.00133805	0.0654772	0	0	0	0	0	0	0	0	0	0	0	0	0	0.0301869	0.16552	0	0.212388	0	0.0137706	0	1.84595	0.150502	0.837057	0	0.00539196	3.72803	2.07503	1.43872	2.03497	0.133479	0.00064642	0.552786	0.0262885	0.0844532	0.00857548	0.0186986
5	Akita	32	Cast and forged steel products	0.0597202	0	0.00426086	0	0	0	0	0	0	0.0251621	0	0	0	0	0	0	0	0	0	0	0	0	0	0	0	0	0.00927266	0.0290596	0.0178206	0	0	0.106407	0	0	0.0816396	3.95715	0.621739	15.6627	10.3741	2.06649	0.0040781	2.93934	0.273375	0.106134	0.00400744	0.0114159
5	Akita	33	Other iron or steel products	0	0	0	0	0	0	0	0	0	0.611555	0	0	0	0	0	0	0	0	0	0.00444467	0	0	0	0.0055755	0	0	0.168449	0.00413231	0.0554337	0	0	0.0325902	0	0	0.0609486	15.591	8.06044	5.39107	3.31118	0.113208	0.00202969	0.732405	0	0.213407	0.0498631	0.0321967
5	Akita	34	Non-ferrous metals	0	0	0	0	0	0	0.0430164	0	0	0.122157	0	0	-0.643724	0	5.61824	0	0.732168	0	0	12.2521	0	0	0	0.304558	-0.0432212	1.56892	0	0.846467	1.142	0	0.228701	0.453002	-0.0273827	61.7233	174.919	-2.1967	10.1918	-0.0707704	3.58565	0.14097	0	4.72838	0.233583	45.0872	0.0233463	0.110844
5	Akita	35	Non-ferrous metal products	0	0	0	0	0.273103	0.124654	0.000997561	0	0.00399153	0.0549572	0	0.000461535	0.0911681	0	0	0	0	0	0	0.0102552	0.0322169	0	0	0.0529708	0.0716652	0.000616671	0	0.00168255	0.0216681	0	0	0	0	0.0126298	0.381744	6.20542	0.747864	1.69917	1.91961	0.151688	0.00110191	1.11292	0.193037	1.02666	0.0221977	0.169653
5	Akita	36	Metal products for construction and architecture	0.0135787	0	0	0	0	0	0	0	0.00191934	0.0266988	0	0	0	0	0	0	0	0	0	0	0	0	0	0	0	0	0.0210835	0	0	0	0	0	0	0	0.00412502	1.95024	0.0740954	0.110484	0	0.0154054	0	0	0	0	0	0.00173045
5	Akita	37	Other metal products	0.823481	0	0.726674	0	3.19533	8.26885	0.004984	0.174173	0.387453	0.936012	0.15949	0.0215219	0.0692562	0	0.124839	0	0.158786	0.0253533	0	0.882076	1.28405	0	0.0598126	0.20332	5.48179	0.086268	0.721862	0.099008	0.354845	0	0.00176653	0.0976057	0	0.05008	0.224504	9.27819	3.91301	6.24449	11.893	0.483463	0.0256915	2.66412	0.60688	0.215872	0.0631159	0.321923
5	Akita	38	General industrial machinery	0.0043659	0	0.01599	0	0	0	0	0	0	0.00178841	0	0	0	0	0	0	0	0	0	0	0	0	0.00041988	0.0949088	0	0	0	0.0024785	0.00987951	0	0	0.00383962	0.000801778	0.00113905	0.0042552	0.0116625	0.0120685	7.40084	2.69658	0.0330214	0.00243476	0.114512	0.0289122	0.00181044	0.00546874	0.00421923
5	Akita	39	Special industrial machinery	0	0	0	0	0	0	0	0	0	0	0	0	0	0	0	0	0	0	0	0	0	0	0	0	0	0	0	0	0	0	0	0	0	0	0	0	0	0.781289	122.877	0	0	0	0	0.0287411	0	0
5	Akita	40	Other general machines	0	0	0.0913227	0	0	0	0	0	0.00589971	0.130917	0	0	0	0	0	0	0	0	0	0.00208047	0	0	0	0.038277	0	0	0	0.0348167	0.0435919	0	0	0.0190687	0	0	0.0507182	0.0907405	0.0639314	2.27159	6.09208	1.49727	0.00190012	0.706858	0.205498	0.0395612	0.0149376	0.0531907
5	Akita	41	Machinery for office and service industry	0	0	0	0	0	0	0	0	0	0	0	0	0	0	0	0	0	0	0	0	0	0	0	0	0	0	0	0	0	0	0	0	0	0	0	0	0	0	0	0	0.0178535	0	0	0	0	0
5	Akita	42	Industrial electric equipment	0.0210103	0	0.00104932	0	0	0	0	0	0.00103943	0.00206555	0	0	0	0	0	0	0	0	0	0	0	0	0	0.000919604	0	0	0	0	0	0	0	0	0	0	0	0.240825	0.0063358	5.1217	4.54425	0.0178775	0.00903879	11.1336	0.373423	0.138006	0.032568	0.137758
5	Akita	43	Applied electric equipment and electric mesuring instruments	0	0	0	0	0	0	0	0	0	0	0	0	0	0	0	0	0	0	0	0	0	0	0	0	0	0	0	0	0	0	0	0	0	0	0	0	0	0.077208	1.54868	0.010856	0	1.51012	1.91737	0	0	0
5	Akita	44	Other electric equipment	0.0458179	0	0.00228828	0	0.00230007	0	0	0	0	0.0157655	0	0	0	0	0	0	0	0	0	0.0239801	0	0	0	0.00200541	0	0	0	0	0	0	0	0	0	0	0.00243579	0	0.052964	0.713289	2.59434	0.0181935	0.00219013	1.1936	0.321036	1.76241	0.0301306	0.194145
5	Akita	45	Household electric and electric applications	0	0	0	0	0	0	0	0	0	0	0	0	0	0	0	0	0	0	0	0	0	0	0	0	0	0	0	0	0	0	0	0	0	0	0	0	0	0	0	0	0	0	0	0	0.0503093	0
5	Akita	46	Communication equipment	0.00567893	0	0	0	0	0.00272967	0	0	0	0	0	0	0.00262684	0	0	0	0	0	0	0	0.0376657	0	0	0	0.00493843	0	0	0	0	0	0	0	0	0	0.00301906	0.0110327	0	0.0296493	0.0134768	0	0	0.00252459	0.00485256	0	0	0.172243
5	Akita	47	Electric computing equipment and accessory equipment	0	0	0	0	0	0	0	0	0	0	0	0	0	0	0	0	0	0	0	0	0	0	0	0	0	0	0	0	0	0	0	0	0	0	0	0	0	0	0.00556796	0	0	0	0	0	0	0.000237843
5	Akita	48	Semiconductor devices and integrated circuits	0	0	0	0	0	0	0	0	0	0	0	0	0	0	0	0	0	0	0	0	0	0	0	0	0	0	0	0	0	0	0	0	0	0	0	0	0.0230384	0.0453263	0.815861	0.0130013	0.0164335	2.65932	3.53335	0.00190084	0.11663	1.162
5	Akita	49	Other electrical equipment	0	0	0	0	0	0	0	0	0	0	0	0	2.88139	0	0	0	0	0	0	0	0.0320773	0	0	0	0	0	0	0	0	0	0	0	0	0	0.107987	0.0328854	2.1439	5.75249	97.2767	0.192044	0.582577	68.5385	88.2309	0.0336929	3.27588	44.1531
5	Akita	50	Passenger motor cars	0	0	0	0	0	0	0	0	0	0	0	0	0	0	0	0	0	0	0	0	0	0	0	0	0	0	0	0	0	0	0	0	0	0	0	0	0	0	0	0	0	0	0	0	0	0
5	Akita	51	Other cars	0	0	0	0	0	0	0	0	0	0	0	0	0	0	0	0	0	0	0	0	0	0	0	0	0	0	0	0	0	0	0	0	0	0	0	0	0	0	0	0	0	0	0	0	0	0
5	Akita	52	Motor vheicle parts and accessories	0	0	0	0	0	0	0	0	0	0	0	0	0	0	0	0	0	0	0	0	0	0	0	0	0	0	0	0	0	0	0	0	0	0	0	0	0	0	0.00133	0	0	0	0	0	0	0
5	Akita	53	Other transportation equipment	0.180472	0	0.000199409	0	0	0	0	0	0	0	0	0	0	0	0	0	0	0	0	0	0	0	0	0	0	0	0	0	0	0	0	0	0	0	0	0	0	0	0	0	0	0	0	0	0	0
5	Akita	54	Precision instruments	0.498593	0	0	0	0.0147232	0	0	0	0	0	0.107115	0.0234883	0	0	0	0	0	0	0	0.0153501	0.041684	0	0	0.0770222	0.0255047	0	0	0.0142713	0.0153157	0	0	0	0	0	0	0.0427341	0	4.9	19.1125	0	0	1.68194	0.238081	0	0	0.183144
5	Akita	55	Miscellaneous manufacturing products	0.553425	0	0.161153	0	0.12808	0.0955842	0.00162367	1.36792	0.0779611	0.191811	0.0256935	0.0135218	0.0104132	0.00198993	0	0	0	0	0	0.00196373	0	0	0.0108253	0.0197068	0.00652558	0.0542006	0.002039	0.0620745	0.00391864	0	0	0.0377971	0	0	0.145611	0.0492024	0.00565724	0.0623291	0.170957	0.00212838	0	0.0166798	0.0320606	0.00186706	0	0.0133883
5	Akita	56	Reuse and recycling	0.0800135	0	0	0	0.109858	0.234703	0.00236754	0	0	0	1.51295	0	0	0.302492	0.0338868	0	0.0085244	0	0	0.00071585	0	0.0029922	0	1.07039	0.00178411	0.0848866	0.125616	0.0505812	0.00357122	0	0.132796	0.286066	0.0693261	0.773632	0.181783	0	0.000687424	0	0	0	0	0	0	0	0	0
5	Akita	57	Building construction and repair of construction	0	0	0	0	0	0	0	0	0	0	0	0	0	0	0	0	0	0	0	0	0	0	0	0	0	0	0	0	0	0	0	0	0	0	0	0	0	0	0	0	0	0	0	0	0	0
5	Akita	58	Public construction	0	0	0	0	0	0	0	0	0	0	0	0	0	0	0	0	0	0	0	0	0	0	0	0	0	0	0	0	0	0	0	0	0	0	0	0	0	0	0	0	0	0	0	0	0	0
5	Akita	59	Other civil enginnering and construction	0	0	0	0	0	0	0	0	0	0	0	0	0	0	0	0	0	0	0	0	0	0	0	0	0	0	0	0	0	0	0	0	0	0	0	0	0	0	0	0	0	0	0	0	0	0
5	Akita	60	Electricity	15.68	0	1.81661	0	17.6576	3.062	1.86759	1.67152	3.36554	0.401086	11.1885	0.806985	4.13805	1.33474	1.99924	0	3.68173	0.811531	0	1.51268	3.24617	0.193559	0.641013	11.0927	3.18446	0.915186	1.35163	0.148291	3.51654	0	6.42799	2.87195	0.411625	0.282128	1.26998	5.60068	3.86376	3.5928	8.88856	1.05398	0.00469917	2.66588	0.483013	2.80796	0.0415598	0.214857
5	Akita	61	Gas supply and heat supply	0	0	0	0	0	0	0	0	0	0	0	0	0	0	0	0	0	0	0	0	0	0	0	0	0	0	0	0	0	0	0	0	0	0	0	0	0	0	0	0	0	0	0	0	0	0
5	Akita	62	Water supply and waste management services	0	0	0	0	0	0	0	0	0	0	0	0	0	0	0	0	0	0	0	0	0	0	0	0	0	0	0	0	0	0	0	0	0	0	0	0	0	0	0	0	0	0	0	0	0	0
5	Akita	63	Commerce	10.3911	0	0.250941	0	15.7777	2.62959	0.353254	1.38982	0.800039	0.536172	2.82071	0.0862276	3.54873	0.167951	0.121319	0	0.447359	0.0179256	0	1.41063	0.315386	0.0153951	0.363839	3.39737	0.608899	0.199549	0.833695	0.0362972	0.484344	0	0.281717	0.201871	0.456716	0.188738	0.562668	3.77606	1.06247	4.10294	8.69675	0.562862	0.0141281	3.05083	0.558624	1.01622	0.054211	0.294422
5	Akita	64	Financial and insurance	0.0573748	0	0.0102768	0	0.0167206	0.00944624	0.00284523	0.00958573	0.00248781	0.00180419	0.00961831	0.000260384	0.0132947	0.0011649	0.000663816	0	0.00207138	8.86136e-05	0	0.00708648	0.00137602	0.000158063	0.000275164	0.00375058	0.00183464	0.00153079	0.0087952	0.000274226	0.00230907	0	0.00121016	0.000644662	0.000907575	0.00226201	0.00142887	0.0213146	0.0032246	0.00820283	0.0216727	0.00404116	2.0722e-05	0.00854383	0.000691463	0.00275402	8.82396e-05	0.000889452
5	Akita	65	Real estate agencies and rental services	0	0	0	0	0	0	0	0	0	0	0	0	0	0	0	0	0	0	0	0	0	0	0	0	0	0	0	0	0	0	0	0	0	0	0	0	0	0	0	0	0	0	0	0	0	0
5	Akita	66	House rent	0	0	0	0	0	0	0	0	0	0	0	0	0	0	0	0	0	0	0	0	0	0	0	0	0	0	0	0	0	0	0	0	0	0	0	0	0	0	0	0	0	0	0	0	0	0
5	Akita	67	Transport	8.5874	0.000312704	2.2827	0	2.90766	0.328548	0.0862623	0.202992	0.27596	0.128607	0.910547	0.0199552	0.572881	0.07869	0.0432605	0	0.242889	0.00293847	0	0.263787	0.0668035	0.0284944	0.218613	0.239686	0.0615574	0.0939255	1.53229	0.00606232	0.102616	0	0.0839071	0.0961666	0.0299517	0.0741685	0.22158	1.26163	0.369152	0.75851	1.43206	0.153875	0.00162418	0.334327	0.028308	0.0667865	0.00771419	0.0790605
5	Akita	68	Communication	0.0134845	0	0.00294228	0	0.0109425	0.00302053	0.00155798	0.00430749	0.000841983	0.00160883	0.00469172	0.000209693	0.0174707	0.00052075	0.000540592	0	0.00051923	0	0	0.00602969	0.0184207	0	0.000906528	0.00733458	0.00392771	0.00105066	0.00316599	0.000127408	0.00222188	0	0.000963857	0.000690817	0.000288509	0.000478183	0.0068555	0.0445412	0.00575735	0.017181	0.0206915	0.0032305	0	0.0160923	0.00307635	0.00306188	0.000184486	0.00210217
5	Akita	69	Broadcasting	0	0	0	0	0	0	0	0	0	0	0	0	0	0	0	0	0	0	0	0	0	0	0	0	0	0	0	0	0	0	0	0	0	0	0	0	0	0	0	0	0	0	0	0	0	0
5	Akita	70	Information services	0.00644323	0	7.60998e-05	0	0.00426169	0.00292964	0.000150717	0.000462643	0.000226148	0.000513602	0.00235519	4.3582e-05	0.00262797	0.000357885	7.86487e-05	0	0.000505661	2.05363e-05	0	0.00165194	0.00169125	0	0.000125607	0.00240093	0.000662525	0.00037268	0.000934524	6.35523e-05	0.000625192	0	0.000300489	0.000146188	0.00027583	0.000215806	0.000775339	0.00364743	0.00170669	0.00514514	0.014991	0.00116071	2.08102e-05	0.00745122	0.00204602	0.00334705	2.04497e-05	0.000737892
5	Akita	71	﻿Internet based services	4.21209e-06	0	2.10364e-06	0	2.46689e-05	6.7487e-06	1.21517e-06	9.18178e-06	1.38921e-06	3.4508e-06	5.76878e-06	0	3.83174e-05	7.4464e-07	7.247e-07	0	7.95499e-07	0	0	7.34837e-06	2.39459e-05	0	8.10174e-07	2.15086e-05	3.66286e-06	1.50238e-06	5.34104e-06	0	2.19956e-06	0	6.46057e-07	1.34704e-06	0	7.32612e-07	1.19427e-05	5.79631e-05	9.87919e-06	1.86591e-05	2.79882e-05	3.98226e-06	0	3.68259e-05	6.59848e-06	6.28798e-06	0	3.75746e-06
5	Akita	72	Image information production and distribution industry	0.000175323	0	6.46606e-05	0	0.00030872	5.70454e-05	0.000112054	0.000291044	2.13504e-05	4.50792e-05	0.000132988	6.48039e-06	0.000232062	0.000214578	2.50599e-05	0	3.05645e-05	0	0	0.000223047	0.000148229	0	2.17899e-05	0.000219586	0.000218137	4.90656e-05	0.000246255	1.04998e-05	0.000180291	0	2.23404e-05	2.07022e-05	1.48602e-05	2.81483e-05	3.72823e-05	0.000550212	0.000246725	0.000238119	0.00040454	8.26231e-05	0	0.000729043	6.68386e-05	0.000171801	5.06791e-06	0.000108276
5	Akita	73	Public administration	0	0	0	0	0	0	0	0	0	0	0	0	0	0	0	0	0	0	0	0	0	0	0	0	0	0	0	0	0	0	0	0	0	0	0	0	0	0	0	0	0	0	0	0	0	0
5	Akita	74	Education and Research	0.000396256	0	3.68641e-05	0	0.00313788	0.00140796	0.000109275	0.000263581	2.8829e-05	0.000179505	0.00196863	1.55561e-05	0.00017251	0.000776761	0.00045117	0	0.00148794	0.000126446	0	0.0104631	0.00582875	1.69977e-05	0.00010536	0.00489026	0.00144929	0.00124086	0.00134483	0.000113421	0.00265555	0	0.000373609	0.0003224	2.14031e-06	0.000275685	0.00143951	0.00396799	0.000470554	0.00574921	0.0363607	0.000154261	4.27108e-05	0.0161219	0.00248303	0.00425682	0.000191606	0.00126666
5	Akita	75	Medical service, health and social security and nursing care	3.42581e-05	0	9.35178e-06	0	7.17814e-05	3.64109e-05	2.20993e-06	1.23497e-05	2.73699e-06	2.30109e-06	2.19539e-05	3.40819e-07	2.24409e-05	2.70844e-06	2.19659e-06	0	5.78686e-06	2.00747e-07	0	3.27416e-05	1.61291e-05	9.31005e-07	2.2101e-06	1.9558e-05	8.51174e-06	2.73227e-06	1.48013e-05	4.14158e-07	4.88911e-06	0	3.52481e-06	1.83731e-06	2.81353e-06	6.66173e-07	2.94114e-06	4.52656e-05	1.49721e-05	2.01987e-05	0.000112101	2.53478e-05	2.03424e-07	2.27025e-05	2.54549e-06	3.17652e-06	1.999e-07	4.36579e-06
5	Akita	76	Advertising and survery	0	0	0	0	0	0	0	0	0	0	0	0	0	0	0	0	0	0	0	0	0	0	0	0	0	0	0	0	0	0	0	0	0	0	0	0	0	0	0	0	0	0	0	0	0	0
5	Akita	77	Giids rental and leasing services	0.000327194	0	4.67548e-05	0	0.000375965	9.89071e-05	2.76764e-05	5.00075e-05	2.10936e-05	2.32367e-05	9.18238e-05	2.59809e-06	0.000207941	4.91588e-06	5.74108e-06	0	1.89059e-05	8.74463e-07	0	7.17971e-05	1.36127e-05	0	5.0276e-05	0.000227188	8.66486e-05	2.13242e-05	0.000182344	4.51023e-06	0.000194579	0	1.66337e-05	1.20051e-05	1.37878e-05	7.2547e-06	4.23774e-05	0.000286315	0.000165843	0.00033259	0.000996875	0.000177192	8.86126e-07	0.000656816	3.20767e-05	7.10303e-05	3.48309e-06	5.37454e-05
5	Akita	78	Other business services	0	0	0	0	0	0	0	0	0	0	0	0	0	0	0	0	0	0	0	0	0	0	0	0	0	0	0	0	0	0	0	0	0	0	0	0	0	0	0	0	0	0	0	0	0	0
5	Akita	79	Personal services	0.111758	0	0.0019934	0	0.0380696	0.00767403	0	0.00407841	0.000987306	0	0.0109329	0	0.015693	0	0	0	0.00113072	0	0	0.00731143	0.00189091	0	0	0.0104819	0.00260318	0	0.00325359	0	0.00104215	0	0	0	0	0.00208266	0.0021219	0.0164776	0.00401205	0.0123137	0.0189439	0.00226414	0	0.0230668	0.00170528	0.00595845	0	0.000890138
5	Akita	80	Activities not elsewhere classified	0	0	0	0	0	0	0	0	0	0	0	0	0	0	0	0	0	0	0	0	0	0	0	0	0	0	0	0	0	0	0	0	0	0	0	0	0	0	0	0	0	0	0	0	0	0
6	Yamagata	1	Agriculture, forestry and fishery	230.821	0	0.00420456	0	475.374	10.5697	1.70499	0.0137638	51.1705	0	0.518855	0	0	0.0223248	0.0304177	0	0.057239	0	0	0.0660926	0.566353	0	0.053437	0	6.61451	0	0	0	0.00439629	0	0	0	0	0	0	0	0	0	0	0	0	0	0	0	0	0
6	Yamagata	2	Metallic ores	0	0	0	0	0	0	0	0	0	0	0	0	0	0	0	0	0	0	0	0	0	0	0	0	0	0	0	0	0	0	0	0	0	0	0	0	0	0	0	0	0	0	0	0	0	0
6	Yamagata	3	Non-metallic ores	0.00578201	0	0.00175773	0	0	0	0	0	0	0	0.0459067	0	0	0.0226658	0.0215398	0	0.00170921	0	0	0.000789436	0.00119097	-0.00109993	0.162469	0	0.00306056	0.0860805	0.960412	0.0227526	0.184313	0	0	0.00120593	0	0.00498462	0.000801876	0.00170937	0.000505391	0	0	0.000570419	0	0	0	0	0	0
6	Yamagata	4	Coal mining, crude petroleum and natural gas	0	0	0	0	0	0	0	0	0	0	0	0	0	0	0	0	0	0	0	0	0	0	0	0	0	0	0	0	0	0	0	0	0	0	0	0	0	0	0	0	0	0	0	0	0	0
6	Yamagata	5	Food and Tobacco	189.696	0	0	0	283.83	22.4992	-0.00450633	0.200042	0.020607	0	1.76373	0.00416983	0	0.0165685	0.0107499	0	0.100301	0	0	0.299758	2.53576	0	0	0.0227893	0	0	0	0.0101342	0.0870066	0	0	0	0	0	0	0	0	0	0	0	0	0	0	0	0	0
6	Yamagata	6	Beverage	0.767503	0	0	0	1.12974	11.8896	0	0	0	0	0	0	0	0	0	0	0	0	0	0	0.0277327	0	0	0	0	0	0	0	0	0	0	0	0	0	0	0	0	0	0	0	0	0	0	0	0	0
6	Yamagata	7	Textile products	2.92907	0	0	0	0.0252068	0.0402259	13.1172	52.9497	0.091085	0.641742	1.4671	0.0201066	0.25549	0.1154	0	0	0	0	0	0	0	0	0	0.285709	9.31525	0.00895501	0	0	0.0611828	0	0	0	0	0	0.133471	0.162584	0.0672975	0.047665	5.37018	0	0	0	0	0	0.0628965	0.00746551
6	Yamagata	8	Wearing aparel and other textile products	32.6599	0	2.42902	0	13.1039	2.48572	0.186491	8.90766	1.24875	0.605248	2.30467	1.23261	0.71193	0.78363	0.0635538	0	0.139525	0	0	0.837757	1.66248	0	2.13149	0.485031	1.31165	0.527016	1.10407	0.269613	1.25382	0	0.311614	0.324859	0.0678362	0.128495	0.850958	2.48178	1.36144	1.69478	3.00966	0.384154	0	5.93902	1.05212	0.306353	0.0578368	1.09839
6	Yamagata	9	Timber and wooden products	2.43367	0	0.042898	0	0.578513	0.0894539	0	0.0409582	14.3735	5.1018	19.3025	0.0286621	0.00993278	0.00379623	0	0	0.00811102	0	0	0.0187313	0	0	0	0.0751902	0.0186735	0.130207	0.0233391	0.202012	0.123349	0	0	0.0446373	0	0	0.209291	0.764823	0.219447	0.010192	0.0271783	0.00812074	0	0.0477308	0.00917441	0	0	0.00638527
6	Yamagata	10	Furniture and fixtures	0.26005	0	0.350666	0	1.61876	0.42499	0	0.425155	0.167248	4.83194	0.486749	0.0833051	0.31275	0.0413759	0.0402679	0	0.117872	0.0245339	0	0.544416	0.899354	0	0.0150058	0.808132	0.904563	0	0.211982	0.139193	0.217278	0	0.0957285	0.0623734	0	0.0271384	0.317972	0.290496	0.182979	0.308569	1.83905	0.0295032	0	0.543349	0.277761	0.0647021	0.0244304	0.51036
6	Yamagata	11	Pulp, paper, paperboard, building paper	0.0334544	0	0	0	0.0697603	0.0173174	0.0133635	0.00799382	0.109489	0.101198	9.74498	3.68867	3.93532	0	-0.000531315	0	0	0.0165093	0	0.33079	0.0380379	0	0	0.108131	0.148594	0.0765523	0	0.0170301	0.00161261	0	0	0	0.000567115	0	0.00930302	0.00799919	0.00620823	0.000977138	0.000977125	0.00350352	0	0.0393544	0.00175916	0.00102445	0.000967039	0.01056
6	Yamagata	12	Paper products	14.9133	0	0	0	9.6624	4.49423	0.0556526	0.282287	0.0306335	0.238817	0.354441	0.0171656	0.185071	0.111151	0.0147511	0	0.0377818	0.00674052	0	1.88713	2.17756	0	0.00274849	0.381514	0.248522	0.466355	0.00258847	0.266537	0.161675	0	0	0	0.044611	0	0.00506438	0.00694015	0.349511	0.0158251	0.0113035	0.0243174	0	0.311267	0.0610502	0.011851	0.0156615	0.0382412
6	Yamagata	13	Publishing, printing	0.0386411	0	0.00718083	0	4.23866	0.304951	0.0287768	0.179239	0.0311201	0.0574245	0.0221534	0.0546953	4.3213	0.0104851	0.0120597	0	0.00509148	0.00339119	0	0.520177	0.1754	0	0.00414833	0.0275326	0.110185	0.0884652	0.0156272	0.00612177	0.00844681	0	0.00827	0.0146566	0.000990176	0.00468898	0.0687937	0.100384	0.129171	0.120278	0.208991	0.0224294	0.000859104	0.0902847	0.0568221	0.000894341	0.0118191	0.0617261
6	Yamagata	14	Chemical fertilizer	1.49734	0	0	0	0	0.000188655	0	0	0	0	0	0	0	0.255827	0.0115473	0	0.0393606	0.000185142	0	0.00369753	0.00725172	0	0	0	0.000853272	0	0	0	0.000614873	0	0	0	0	0	0	0	0	0	0	0	0	0	0	0.000195307	0	0
6	Yamagata	15	Basic inorganic chemical products	0.382406	0	0.0025296	0	3.02827	0.384662	0.0547959	0.151123	0	0.00746918	2.68689	0.0263662	0.00234286	1.51237	1.78559	0	1.45782	0.102737	0	4.83524	2.70669	0	0.00876802	0.660636	3.82975	1.06228	0.0357827	0.0985839	0.050254	0	0.0466126	0.0145781	0.00279048	0.169144	0.0807801	0.543659	0.0840057	0.105776	0.271648	0.034478	0	0.146358	0.0216398	0.0428469	0.00237915	0.0677745
6	Yamagata	16	Basic organic chemical products	0	0	0	0	1.52137e-06	0	0	0	0	0	4.15065e-06	0	1.54202e-05	0.000170375	0	0	0.01328	0.000150107	0	0.000234751	2.72795e-05	0	0	1.32647e-06	3.42607e-05	1.94574e-05	0	0	3.16519e-06	0	0	1.45379e-06	0	0	0	0	0	7.19211e-06	0	0	0	0	0	0	0	0
6	Yamagata	17	Organic chemical products	0.00300646	0	0.000600605	0	0.519181	0.512723	0.0192552	0.000983051	0.0065444	0.00827593	0.294269	0.00288929	0.0189131	0.0229609	0.0931083	0	3.70525	1.13796	0	1.37399	1.4887	0	0.00693933	0.940079	5.64352	0.0102946	0.0019606	0.000585172	0.344768	0	0	0	0	0	0.0210977	0.00233632	0.00423088	0.000570784	0.00513698	0.00136436	0	0.0176423	0.00411036	0.00119684	0.00225954	0.00214557
6	Yamagata	18	Synthetic resins	0	0	0	0	0	0	0.00108871	0	5.92685e-05	0.00159001	0.00224239	0.000431747	0.00199495	0	0	0	0	0	0	0.0353008	0	0	0	0.538046	0.00140643	0	0	0	0.0017517	0	0	0	0	0	0.00471301	0.000174558	0.000481691	0	0	0.000475711	0	0.0175752	0	0.00113268	0.00045019	0.000961837
6	Yamagata	19	Synthetic fibers	0	0	0	0	0	0	0	0	0	0	0	0	0	0	0	0	0	0	0	0	0	0	0	0	0	0	0	0	0	0	0	0	0	0	0	0	0	0	0	0	0	0	0	0	0	0
6	Yamagata	20	Final chemical products	44.8282	0	0.567047	0	2.61194	0.873191	0.380249	0.258261	4.77692	1.29578	2.05982	2.69623	10.6133	0.178031	0.10192	0	0.553791	0.149032	0	10.164	2.79705	0.0215989	1.31602	1.89273	3.2153	0.11621	0.772612	0.0144124	0.891934	0	0.04543	0.123138	0.00543938	0	0.272933	2.31127	1.79131	0.726332	3.42074	0.112011	0.00471935	1.0446	0.257307	0.314427	0.00927517	0.21578
6	Yamagata	21	Medicaments	14.594	0	0	0	1.28812	0	0	0.00819358	0	0	0	0	0	0	0	0	0	0	0	0.335744	23.0592	0	0	0	0	0	0	0	0	0	0	0	0	0	0	0	0	0	0	0	0	0	0	0	0	0
6	Yamagata	22	Petroleum refinery products	0.328051	0	0.00904477	0	0.0773803	0.0251212	0.0027555	0.00385314	0.0139507	0.000894284	0.100723	0.00483457	0.0111694	0.0138153	0.00576229	0	0.00787141	0.00916702	0	0.00207747	0.0078354	0.0052464	0.0704317	0.00673225	0.0123329	0.00898151	0.0109204	0.00108645	0.0210304	0	0.00585997	0.00329254	0.00168571	0.00491906	0.00316532	0.0096795	0.00531994	0.00667244	0.00890955	0.00112583	0	0.00154402	0.000282647	0.00148141	0	0.000258193
6	Yamagata	23	Coal products	0	0	4.80034e-05	0	0	0	0	0	0	0	0	0	0	0.000815621	9.92224e-05	0	0.0033764	0	0	0	0	0	0	0	0	0	0	0	0.00228375	0	0.00356032	0.00156765	2.64771e-05	0.000175535	0.000102196	0.000140048	0	2.28099e-05	6.84289e-05	0	0	0	0	0	0	0
6	Yamagata	24	Plastic products	15.9355	0	0	0	20.1469	11.9396	0.1073	0.745608	0.766678	1.27542	0.946005	0.280134	12.5507	0.399211	0.141696	0	0.110382	0.0125318	0	4.52816	6.70411	0	0	67.3178	23.9918	0.469053	0.0384994	0.0215452	0.0924873	0	0	0	0	0.0277244	0.743832	1.20858	0.529635	0.474949	25.5418	0.160748	0.012699	6.4917	0.370778	4.47712	0.187184	1.48119
6	Yamagata	25	Rubber products	0.00234591	0	0.000378746	0	0.000234275	3.20454e-05	3.60631e-05	0.000449611	6.18423e-05	0.000106507	6.46765e-05	6.34032e-05	0.000358495	6.18772e-05	8.60289e-06	0	0.000151094	7.86218e-06	0	0.000126487	0.000473768	0	7.21317e-05	0.000258975	0.0350861	0	4.98169e-05	0	0.000204536	0	0.000256922	0.000115932	4.59128e-06	0	5.31641e-05	0.00229494	0.000209421	0.0036706	0.0121349	0.000184366	2.78846e-05	0.00188201	0.000313321	0.000505923	5.87176e-05	0.00110025
6	Yamagata	26	Glass and glass products	0.238124	0	0	0	8.93551	42.6357	0	0.121659	0	8.36918	0	0	0.0275366	0	0.276546	0	0.0337293	0	0	4.42432	14.6938	0	0	7.73869	2.51077	5.15979	0.194109	0	0.248698	0	0	0	0	0	1.93054	2.39981	0.807838	0.254298	0.254294	0	0.0284563	0.238183	0.127171	0.0592469	0.0838898	0.0796585
6	Yamagata	27	Cement and cement products	0.0011372	0	0	0	0	0	0	0	0	0	0	0	0	0	0	0	0	0	0	0	0	0	0.000874938	0	0	0	1.56519	0	0.00395899	0	0	0.00109104	0	0	0	0	0.000762066	0	0	0	0	0	0	0	0	0
6	Yamagata	28	Pottery, china and earthenware	0	0	0	0	0.00597194	0.000259915	0	0	0	0.00584768	0	0	0	0	0.000279106	0	0	0	0	0	0	0	0	0.000946706	0	0	0.00146929	0.00868299	0	0	0	0	0	0	0	0	0.000815316	0.00102661	0.00102659	0	0	0.0300485	0	0.000538158	0	0.00530612
6	Yamagata	29	Other ceramic, stone and clay products	3.78219	0	0	0	0.505775	0	0	0	0.0316471	0.117917	1.02943	0	0.00739741	0.0339267	1.2712	0	0.027183	0.0452631	0	0.10881	0.40155	0	1.1166	0.174993	0.187745	1.16366	5.38834	0.568071	2.59724	0	0.073588	0.905246	0	3.57152	1.24128	2.12823	1.09312	8.74421	3.33217	0.399161	0	1.02376	0.3143	0.779884	0.022536	0.121263
6	Yamagata	30	Pig iron and crude steel	0	0	0	0	0	0	0	0	0	0	0	0	0	0	0	0	0	0	0	0	0	0	0	0	0	0	0	0	0	0	0	0	0	0	0	0	0	0	0	0	0	0	0	0	0	0
6	Yamagata	31	steel products	0.000335799	0	9.78296e-05	0	0	0	1.81643e-05	0	2.76879e-05	0.0013549	0	0	0	0	0	0	0	0	0	0	0	0	0	0.000624649	0.00342507	0	0.00439489	0	0.000284952	0	0.0381977	0.00311429	0.017321	0	0.000111574	0.0771431	0.042938	0.029771	0.0421091	0.00276205	1.33762e-05	0.0114387	0.000543982	0.00174757	0.00017745	0.000386926
6	Yamagata	32	Cast and forged steel products	0.0676806	0	0.00482881	0	0	0	0	0	0	0.0285161	0	0	0	0	0	0	0	0	0	0	0	0	0	0	0	0	0.0105087	0.0329331	0.020196	0	0	0.12059	0	0	0.0925217	4.48462	0.704614	17.7504	11.757	2.34195	0.00462169	3.33114	0.309815	0.120281	0.00454162	0.0129376
6	Yamagata	33	Other iron or steel products	0	0	0	0	0	0	0	0	0	0.720361	0	0	0	0	0	0	0	0	0	0.00523545	0	0	0	0.00656747	0	0	0.198419	0.00486752	0.0652963	0	0	0.0383886	0	0	0.0717924	18.3649	9.49453	6.35023	3.90029	0.133349	0.0023908	0.862713	0	0.251376	0.0587346	0.037925
6	Yamagata	34	Non-ferrous metals	0	0	0	0	0	0	0.0136554	0	0	0.0387781	0	0	-0.204347	0	1.78348	0	0.232423	0	0	3.88937	0	0	0	0.0966805	-0.0137204	0.498045	0	0.268707	0.362523	0	0.0726002	0.143804	-0.0086925	19.5938	55.5272	-0.697334	3.23534	-0.0224657	1.13825	0.0447504	0	1.501	0.0741499	14.3127	0.00741118	0.0351869
6	Yamagata	35	Non-ferrous metal products	0	0	0	0	2.89637	1.322	0.0105795	0	0.0423318	0.582843	0	0.00489476	0.966874	0	0	0	0	0	0	0.10876	0.341673	0	0	0.561776	0.760037	0.00654004	0	0.0178441	0.229799	0	0	0	0	0.133944	4.04855	65.811	7.9314	18.0204	20.3582	1.60871	0.0116861	11.803	2.04723	10.8881	0.235415	1.79923
6	Yamagata	36	Metal products for construction and architecture	0.0116719	0	0	0	0	0	0	0	0.00164981	0.0229495	0	0	0	0	0	0	0	0	0	0	0	0	0	0	0	0	0.0181227	0	0	0	0	0	0	0	0.00354574	1.67636	0.0636902	0.0949685	0	0.013242	0	0	0	0	0	0.00148744
6	Yamagata	37	Other metal products	1.75461	0	1.54834	0	6.80835	17.6186	0.0106195	0.371113	0.825553	1.99438	0.339828	0.045857	0.147565	0	0.265996	0	0.338329	0.0540208	0	1.87945	2.73596	0	0.127444	0.433217	11.6801	0.183813	1.53808	0.210958	0.756075	0	0.00376398	0.20797	0	0.106706	0.478355	19.7692	8.33753	13.3052	25.3406	1.03012	0.0547413	5.6765	1.29309	0.459963	0.134482	0.685927
6	Yamagata	38	General industrial machinery	0.030514	0	0.111757	0	0	0	0	0	0	0.0124995	0	0	0	0	0	0	0	0	0	0	0	0	0.00293461	0.663334	0	0	0	0.0173226	0.0690495	0	0	0.0268357	0.00560376	0.00796099	0.0297403	0.0815114	0.0843488	51.7257	18.8468	0.230792	0.0170169	0.800343	0.202072	0.0126535	0.0382219	0.0294889
6	Yamagata	39	Special industrial machinery	0	0	0	0	0	0	0	0	0	0	0	0	0	0	0	0	0	0	0	0	0	0	0	0	0	0	0	0	0	0	0	0	0	0	0	0	0	2.05272	322.842	0	0	0	0	0.075513	0	0
6	Yamagata	40	Other general machines	0	0	0.232862	0	0	0	0	0	0.0150435	0.333821	0	0	0	0	0	0	0	0	0	0.00530494	0	0	0	0.0976015	0	0	0	0.0887782	0.111154	0	0	0.0486227	0	0	0.129325	0.231377	0.163017	5.79227	15.534	3.81784	0.00484508	1.8024	0.523994	0.100876	0.0380891	0.13563
6	Yamagata	41	Machinery for office and service industry	0	0	0	0	0	0	0	0	0	0	0	0	0	0	0	0	0	0	0	0	0	0	0	0	0	0	0	0	0	0	0	0	0	0	0	0	0	0	0	0	0.218022	0	0	0	0	0
6	Yamagata	42	Industrial electric equipment	0.165547	0	0.00826792	0	0	0	0	0	0.00819001	0.0162752	0	0	0	0	0	0	0	0	0	0	0	0	0	0.00724587	0	0	0	0	0	0	0	0	0	0	0	1.89754	0.0499219	40.3556	35.8057	0.140863	0.0712196	87.7251	2.94233	1.0874	0.256614	1.08544
6	Yamagata	43	Applied electric equipment and electric mesuring instruments	0	0	0	0	0	0	0	0	0	0	0	0	0	0	0	0	0	0	0	0	0	0	0	0	0	0	0	0	0	0	0	0	0	0	0	0	0	0.0785804	1.57621	0.011049	0	1.53696	1.95145	0	0	0
6	Yamagata	44	Other electric equipment	0.213019	0	0.0106388	0	0.0106936	0	0	0	0	0.0732978	0	0	0	0	0	0	0	0	0	0.11149	0	0	0	0.00932367	0	0	0	0	0	0	0	0	0	0	0.0113246	0	0.246243	3.31627	12.0617	0.0845864	0.0101825	5.54935	1.49258	8.19391	0.140085	0.902631
6	Yamagata	45	Household electric and electric applications	0	0	0	0	0	0	0	0	0	0	0	0	0	0	0	0	0	0	0	0	0	0	0	0	0	0	0	0	0	0	0	0	0	0	0	0	0	0	0	0	0	0	0	0	0.133826	0
6	Yamagata	46	Communication equipment	0.0705748	0	0	0	0	0.0339229	0	0	0	0	0	0	0.032645	0	0	0	0	0	0	0	0.46809	0	0	0	0.0613723	0	0	0	0	0	0	0	0	0	0.0375193	0.137109	0	0.368467	0.167483	0	0	0.0313743	0.0603052	0	0	2.14055
6	Yamagata	47	Electric computing equipment and accessory equipment	0	0	0	0	0	0	0	0	0	0	0	0	0	0	0	0	0	0	0	0	0	0	0	0	0	0	0	0	0	0	0	0	0	0	0	0	0	0	0.486813	0	0	0	0	0	0	0.0207949
6	Yamagata	48	Semiconductor devices and integrated circuits	0	0	0	0	0	0	0	0	0	0	0	0	0	0	0	0	0	0	0	0	0	0	0	0	0	0	0	0	0	0	0	0	0	0	0	0	0.025877	0.0509111	0.916387	0.0146033	0.0184584	2.98699	3.96871	0.00213505	0.131001	1.30517
6	Yamagata	49	Other electrical equipment	0	0	0	0	0	0	0	0	0	0	0	0	2.06124	0	0	0	0	0	0	0	0.022947	0	0	0	0	0	0	0	0	0	0	0	0	0	0.0772503	0.023525	1.53367	4.11513	69.5883	0.137381	0.416755	49.03	63.1173	0.0241027	2.34345	31.5856
6	Yamagata	50	Passenger motor cars	0	0	0	0	0	0	0	0	0	0	0	0	0	0	0	0	0	0	0	0	0	0	0	0	0	0	0	0	0	0	0	0	0	0	0	0	0	0	0	0	0	0	0	0	0	0
6	Yamagata	51	Other cars	0	0	0	0	0	0	0	0	0	0	0	0	0	0	0	0	0	0	0	0	0	0	0	0	0	0	0	0	0	0	0	0	0	0	0	0	0	0	0	0	0	0	0	0	0	0
6	Yamagata	52	Motor vheicle parts and accessories	0	0	0	0	0	0	0	0	0	0	0	0	0	0	0	0	0	0	0	0	0	0	0	0	0	0	0	0	0	0	0	0	0	0	0	0	0	0	0.00441691	0	0	0	0	0	0	0
6	Yamagata	53	Other transportation equipment	0.471721	0	0.000521219	0	0	0	0	0	0	0	0	0	0	0	0	0	0	0	0	0	0	0	0	0	0	0	0	0	0	0	0	0	0	0	0	0	0	0	0	0	0	0	0	0	0	0
6	Yamagata	54	Precision instruments	0.326792	0	0	0	0.00964999	0	0	0	0	0	0.0702064	0.0153949	0	0	0	0	0	0	0	0.0100609	0.0273209	0	0	0.0504825	0.0167165	0	0	0.00935384	0.0100383	0	0	0	0	0	0	0.0280091	0	3.21159	12.5269	0	0	1.10239	0.156045	0	0	0.120038
6	Yamagata	55	Miscellaneous manufacturing products	4.59152	0	1.33702	0	1.06262	0.793021	0.0134708	11.3491	0.646809	1.59137	0.213168	0.112184	0.086394	0.0165095	0	0	0	0	0	0.0162922	0	0	0.0898125	0.163498	0.0541399	0.449679	0.0169167	0.515005	0.0325113	0	0	0.313586	0	0	1.20807	0.408211	0.0469357	0.517117	1.41836	0.0176583	0	0.138385	0.265993	0.0154902	0	0.111076
6	Yamagata	56	Reuse and recycling	0.070647	0	0	0	0.096998	0.207229	0.00209039	0	0	0	1.33584	0	0	0.267082	0.0299199	0	0.00752651	0	0	0.000632051	0	0.00264193	0	0.945089	0.00157526	0.0749496	0.110911	0.04466	0.00315317	0	0.117251	0.252579	0.0612107	0.683069	0.160503	0	0.000606952	0	0	0	0	0	0	0	0	0
6	Yamagata	57	Building construction and repair of construction	0	0	0	0	0	0	0	0	0	0	0	0	0	0	0	0	0	0	0	0	0	0	0	0	0	0	0	0	0	0	0	0	0	0	0	0	0	0	0	0	0	0	0	0	0	0
6	Yamagata	58	Public construction	0	0	0	0	0	0	0	0	0	0	0	0	0	0	0	0	0	0	0	0	0	0	0	0	0	0	0	0	0	0	0	0	0	0	0	0	0	0	0	0	0	0	0	0	0	0
6	Yamagata	59	Other civil enginnering and construction	0	0	0	0	0	0	0	0	0	0	0	0	0	0	0	0	0	0	0	0	0	0	0	0	0	0	0	0	0	0	0	0	0	0	0	0	0	0	0	0	0	0	0	0	0	0
6	Yamagata	60	Electricity	0	0	0	0	0	0	0	0	0	0	0	0	0	0	0	0	0	0	0	0	0	0	0	0	0	0	0	0	0	0	0	0	0	0	0	0	0	0	0	0	0	0	0	0	0	0
6	Yamagata	61	Gas supply and heat supply	0	0	0	0	0	0	0	0	0	0	0	0	0	0	0	0	0	0	0	0	0	0	0	0	0	0	0	0	0	0	0	0	0	0	0	0	0	0	0	0	0	0	0	0	0	0
6	Yamagata	62	Water supply and waste management services	0.0417795	0	0.00965558	0	0.113338	0.0381164	0.00340325	0.00214291	0.0040528	0.000805371	0.0614836	0.00144335	0.0125805	0.0111225	0.00558147	0	0.0183803	0.00417347	0	0.0264112	0.0208022	0	0.0011345	0.0156332	0.0141052	0.00210382	0.0308071	0.000797243	0.010267	0	0.0064836	0.00282942	0.00180532	0.00102589	0.00505191	0.0222811	0.00823455	0.0127533	0.0513236	0.00985172	0	0.0119451	0.00126	0.00798989	0.000153921	0.000876943
6	Yamagata	63	Commerce	8.40226	0	0.202911	0	12.7578	2.12628	0.285641	1.1238	0.646912	0.433549	2.28083	0.0697236	2.8695	0.135805	0.0980983	0	0.361734	0.0144946	0	1.14063	0.255021	0.0124485	0.2942	2.74711	0.492355	0.161355	0.674126	0.0293499	0.391641	0	0.227797	0.163233	0.369301	0.152614	0.454973	3.05332	0.859112	3.31764	7.03219	0.45513	0.011424	2.4669	0.451704	0.821718	0.043835	0.238069
6	Yamagata	64	Financial and insurance	0	0	0	0	0	0	0	0	0	0	0	0	0	0	0	0	0	0	0	0	0	0	0	0	0	0	0	0	0	0	0	0	0	0	0	0	0	0	0	0	0	0	0	0	0	0
6	Yamagata	65	Real estate agencies and rental services	0	0	0	0	0	0	0	0	0	0	0	0	0	0	0	0	0	0	0	0	0	0	0	0	0	0	0	0	0	0	0	0	0	0	0	0	0	0	0	0	0	0	0	0	0	0
6	Yamagata	66	House rent	0	0	0	0	0	0	0	0	0	0	0	0	0	0	0	0	0	0	0	0	0	0	0	0	0	0	0	0	0	0	0	0	0	0	0	0	0	0	0	0	0	0	0	0	0	0
6	Yamagata	67	Transport	10.746	0.000391307	2.8565	0	3.63855	0.411134	0.107946	0.254017	0.345327	0.160934	1.13943	0.0249713	0.716884	0.0984701	0.0541348	0	0.303943	0.00367711	0	0.330094	0.0835957	0.035657	0.273565	0.299935	0.0770309	0.117535	1.91746	0.00758618	0.128411	0	0.104999	0.12034	0.0374805	0.092812	0.277278	1.57877	0.461944	0.949174	1.79204	0.192554	0.00203244	0.418365	0.0354236	0.0835744	0.00965328	0.0989337
6	Yamagata	68	Communication	0	0	0	0	0	0	0	0	0	0	0	0	0	0	0	0	0	0	0	0	0	0	0	0	0	0	0	0	0	0	0	0	0	0	0	0	0	0	0	0	0	0	0	0	0	0
6	Yamagata	69	Broadcasting	0	0	0	0	0	0	0	0	0	0	0	0	0	0	0	0	0	0	0	0	0	0	0	0	0	0	0	0	0	0	0	0	0	0	0	0	0	0	0	0	0	0	0	0	0	0
6	Yamagata	70	Information services	0.132279	0	0.00156232	0	0.087492	0.0601452	0.0030942	0.00949802	0.0046428	0.0105442	0.0483518	0.000894735	0.0539519	0.00734735	0.00161465	0	0.0103812	0.000421609	0	0.0339142	0.0347212	0	0.0025787	0.0492909	0.0136016	0.00765108	0.0191857	0.00130472	0.0128351	0	0.006169	0.00300123	0.00566276	0.00443048	0.0159176	0.0748814	0.0350381	0.105629	0.307763	0.0238292	0.000427232	0.152973	0.0420046	0.0687147	0.00041983	0.0151489
6	Yamagata	71	﻿Internet based services	0.000337669	0	0.000168642	0	0.00197762	0.00054102	9.74159e-05	0.000736072	0.000111368	0.000276639	0.000462463	0	0.00307177	5.96953e-05	5.80967e-05	0	6.37725e-05	0	0	0.000589094	0.00191966	0	6.49489e-05	0.00172427	0.000293639	0.000120441	0.000428173	0	0.000176332	0	5.17922e-05	0.000107987	0	5.8731e-05	0.000957403	0.0046467	0.000791981	0.00149584	0.00224372	0.000319244	0	0.00295221	0.000528977	0.000504086	0	0.000301223
6	Yamagata	72	Image information production and distribution industry	0.00153861	0	0.000567454	0	0.00270929	0.000500624	0.00098337	0.00255417	0.000187369	0.000395611	0.00116709	5.68712e-05	0.00203655	0.00188312	0.000219923	0	0.000268231	0	0	0.00195744	0.00130084	0	0.000191225	0.00192706	0.00191435	0.000430594	0.00216111	9.21454e-05	0.00158221	0	0.000196057	0.000181681	0.000130412	0.000247026	0.000327185	0.0048286	0.00216523	0.0020897	0.0035502	0.000725091	0	0.006398	0.000586568	0.00150771	4.44754e-05	0.000950223
6	Yamagata	73	Public administration	0	0	0	0	0	0	0	0	0	0	0	0	0	0	0	0	0	0	0	0	0	0	0	0	0	0	0	0	0	0	0	0	0	0	0	0	0	0	0	0	0	0	0	0	0	0
6	Yamagata	74	Education and Research	0.00238902	0	0.000222253	0	0.0189182	0.00848857	0.000658814	0.00158913	0.000173809	0.00108223	0.0118688	9.37875e-05	0.00104006	0.00468308	0.00272009	0	0.00897077	0.000762341	0	0.0630818	0.0351414	0.000102479	0.000635213	0.0294833	0.00873774	0.00748114	0.00810794	0.000683815	0.0160103	0	0.00225248	0.00194374	1.29039e-05	0.0016621	0.00867875	0.023923	0.00283696	0.0346619	0.219218	0.000930038	0.000257503	0.0971983	0.0149701	0.0256643	0.00115519	0.00763667
6	Yamagata	75	Medical service, health and social security and nursing care	0.00483189	0	0.00131901	0	0.0101243	0.00513553	0.000311697	0.00174185	0.000386035	0.000324555	0.00309646	4.80703e-05	0.00316515	0.000382009	0.000309816	0	0.0008162	2.83141e-05	0	0.004618	0.00227491	0.000131312	0.000311721	0.00275854	0.00120053	0.000385369	0.00208763	5.84143e-05	0.000689578	0	0.000497152	0.000259141	0.00039683	9.39595e-05	0.00041483	0.00638443	0.00211172	0.0028489	0.0158112	0.00357515	2.86917e-05	0.00320205	0.000359025	0.000448028	2.81946e-05	0.000615767
6	Yamagata	76	Advertising and survery	0.0142684	0	0.011694	0	0.531879	0.512968	0.00696614	0.0290096	0.00434393	0.0235589	0.0813399	0.00351598	0.031646	0.00892561	0.00509865	0	0.00518219	0.00034516	0	1.40298	0.13658	0	0.000633334	0.0917555	0.0213161	0.00450206	0.0161045	0.00213628	0.014902	0	0.00606048	0.00315904	0.00241876	0.00668152	0.00953039	0.126872	0.0171005	0.0897752	0.16774	0.0134898	0.000524645	0.118241	0.0211017	0.0216645	0.00240592	0.018603
6	Yamagata	77	Giids rental and leasing services	0.0545888	0	0.00780053	0	0.0627257	0.0165016	0.00461751	0.00834322	0.00351924	0.00387679	0.0153198	0.000433463	0.0346927	0.000820161	0.000957838	0	0.00315424	0.000145895	0	0.0119786	0.00227113	0	0.00838801	0.037904	0.0144564	0.00355771	0.0304221	0.000752483	0.0324634	0	0.00277516	0.00200293	0.00230035	0.00121037	0.00707021	0.0477686	0.0276692	0.055489	0.166318	0.0295626	0.000147841	0.109583	0.00535166	0.0118506	0.000581116	0.00896684
6	Yamagata	78	Other business services	0	0	0	0	0	0	0	0	0	0	0	0	0	0	0	0	0	0	0	0	0	0	0	0	0	0	0	0	0	0	0	0	0	0	0	0	0	0	0	0	0	0	0	0	0	0
6	Yamagata	79	Personal services	0.109293	0	0.00194944	0	0.0372301	0.00750481	0	0.00398848	0.000965535	0	0.0106918	0	0.015347	0	0	0	0.00110578	0	0	0.00715021	0.00184922	0	0	0.0102507	0.00254577	0	0.00318184	0	0.00101917	0	0	0	0	0.00203673	0.00207511	0.0161143	0.00392359	0.0120422	0.0185262	0.00221421	0	0.0225582	0.00166767	0.00582706	0	0.000870509
6	Yamagata	80	Activities not elsewhere classified	0	0	0	0	0	0	0	0	0	0	0	0	0	0	0	0	0	0	0	0	0	0	0	0	0	0	0	0	0	0	0	0	0	0	0	0	0	0	0	0	0	0	0	0	0	0
7	Fukushima	1	Agriculture, forestry and fishery	251.684	0	0.00458461	0	518.342	11.5251	1.85911	0.0150079	55.7957	0	0.565753	0	0	0.0243427	0.0331672	0	0.0624127	0	0	0.0720666	0.617545	0	0.0582671	0	7.21239	0	0	0	0.00479366	0	0	0	0	0	0	0	0	0	0	0	0	0	0	0	0	0
7	Fukushima	2	Metallic ores	0	0	0	0	0	0	0	0	0	0	0	0	0	0	0	0	0	0	0	0	0	0	0	0	0	0	0	0	0	0	0	0	0	0	0	0	0	0	0	0	0	0	0	0	0	0
7	Fukushima	3	Non-metallic ores	0.0087921	0	0.0026728	0	0	0	0	0	0	0	0.0698055	0	0	0.0344654	0.0327533	0	0.00259902	0	0	0.00120041	0.00181099	-0.00167255	0.24705	0	0.00465388	0.130894	1.4604	0.0345976	0.280266	0	0	0.00183374	0	0.0075796	0.00121933	0.00259926	0.000768496	0	0	0.000867377	0	0	0	0	0	0
7	Fukushima	4	Coal mining, crude petroleum and natural gas	0	0	0	0	0	0	0	0	0	0	0	0	0	0	0	0	0	0	0	0	0	0	0	0	0	0	0	0	0	0	0	0	0	0	0	0	0	0	0	0	0	0	0	0	0	0
7	Fukushima	5	Food and Tobacco	430.92	0	0	0	644.758	51.1099	-0.0102367	0.454423	0.0468116	0	4.00655	0.00947233	0	0.0376377	0.0244199	0	0.227847	0	0	0.68094	5.76032	0	0	0.0517689	0	0	0	0.0230213	0.197647	0	0	0	0	0	0	0	0	0	0	0	0	0	0	0	0	0
7	Fukushima	6	Beverage	2.93331	0	0	0	4.31775	45.4409	0	0	0	0	0	0	0	0	0	0	0	0	0	0	0.105991	0	0	0	0	0	0	0	0	0	0	0	0	0	0	0	0	0	0	0	0	0	0	0	0	0
7	Fukushima	7	Textile products	1.03305	0	0	0	0.00889017	0.0141872	4.62629	18.6748	0.0321247	0.226335	0.517428	0.00709138	0.0901084	0.0407003	0	0	0	0	0	0	0	0	0	0.100767	3.28539	0.00315833	0	0	0.0215785	0	0	0	0	0	0.0470739	0.0573417	0.0237351	0.0168109	1.894	0	0	0	0	0	0.0221829	0.002633
7	Fukushima	8	Wearing aparel and other textile products	36.4198	0	2.70865	0	14.6124	2.77188	0.20796	9.93312	1.39251	0.674925	2.56999	1.37451	0.793888	0.873843	0.0708702	0	0.155588	0	0	0.9342	1.85387	0	2.37687	0.540869	1.46265	0.587686	1.23117	0.300651	1.39816	0	0.347488	0.362257	0.0756456	0.143288	0.948921	2.76749	1.51817	1.88989	3.35613	0.428379	0	6.62272	1.17324	0.341621	0.064495	1.22484
7	Fukushima	9	Timber and wooden products	7.87007	0	0.138725	0	1.87081	0.289279	0	0.132452	46.4816	16.4984	62.4211	0.0926883	0.032121	0.0122764	0	0	0.0262297	0	0	0.0605738	0	0	0	0.243152	0.060387	0.421068	0.0754749	0.653274	0.39889	0	0	0.14435	0	0	0.676811	2.47331	0.709654	0.0329592	0.0878901	0.0262611	0	0.154353	0.0296685	0	0	0.0206489
7	Fukushima	10	Furniture and fixtures	0.423077	0	0.570502	0	2.63358	0.69142	0	0.691688	0.272098	7.86112	0.791896	0.13553	0.508815	0.0673148	0.0655122	0	0.191766	0.0399144	0	0.885715	1.46317	0	0.024413	1.31476	1.47164	0	0.344875	0.226454	0.353491	0	0.155741	0.101476	0	0.0441517	0.517311	0.47261	0.29769	0.502014	2.99196	0.047999	0	0.883979	0.451891	0.105264	0.039746	0.830308
7	Fukushima	11	Pulp, paper, paperboard, building paper	0.679906	0	0	0	1.41777	0.351947	0.271592	0.162461	2.22518	2.05669	198.051	74.9662	79.979	0	-0.0107981	0	0	0.335525	0	6.72278	0.773058	0	0	2.19758	3.01993	1.5558	0	0.346109	0.0327737	0	0	0	0.0115257	0	0.189069	0.16257	0.126172	0.0198587	0.0198585	0.0712033	0	0.799814	0.035752	0.0208203	0.0196535	0.214615
7	Fukushima	12	Paper products	90.8903	0	0	0	58.8882	27.3904	0.339178	1.72041	0.186698	1.45549	2.16016	0.104617	1.12793	0.677419	0.0899016	0	0.230264	0.0410806	0	11.5012	13.2713	0	0.0167508	2.32516	1.51464	2.84223	0.0157756	1.62443	0.985342	0	0	0	0.271885	0	0.0308652	0.0422972	2.13012	0.096447	0.0688897	0.148204	0	1.89704	0.372075	0.0722265	0.0954501	0.233063
7	Fukushima	13	Publishing, printing	0.0480201	0	0.00892377	0	5.26748	0.378969	0.0357616	0.222744	0.0386736	0.0713627	0.0275305	0.067971	5.37018	0.0130301	0.0149868	0	0.0063273	0.0042143	0	0.646435	0.217973	0	0.00515522	0.0342153	0.136929	0.109938	0.0194203	0.00760765	0.010497	0	0.0102773	0.018214	0.00123051	0.0058271	0.0854914	0.124749	0.160523	0.149472	0.259717	0.0278734	0.00106763	0.112199	0.0706141	0.00111142	0.0146878	0.0767084
7	Fukushima	14	Chemical fertilizer	187.528	0	0	0	0	0.0236273	0	0	0	0	0	0	0	32.04	1.4462	0	4.92955	0.0231874	0	0.463082	0.908211	0	0	0	0.106864	0	0	0	0.0770071	0	0	0	0	0	0	0	0	0	0	0	0	0	0	0.0244604	0	0
7	Fukushima	15	Basic inorganic chemical products	5.21031	0	0.034466	0	41.2604	5.24105	0.746599	2.05907	0	0.101768	36.609	0.359241	0.0319216	20.6061	24.3287	0	19.863	1.3998	0	65.8805	36.8789	0	0.119465	9.00121	52.1806	14.4736	0.487542	1.34321	0.684715	0	0.6351	0.198628	0.0380206	2.3046	1.10064	7.40739	1.14458	1.44121	3.70123	0.469766	0	1.99414	0.294844	0.583792	0.0324161	0.923433
7	Fukushima	16	Basic organic chemical products	0	0	0	0	0	0	0	0	0	0	0	0	0	0	0	0	0	0	0	0	0	0	0	0	0	0	0	0	0	0	0	0	0	0	0	0	0	0	0	0	0	0	0	0	0	0
7	Fukushima	17	Organic chemical products	0.0415292	0	0.00829635	0	7.17161	7.0824	0.265978	0.0135792	0.0903999	0.114318	4.06484	0.0399107	0.261252	0.317166	1.28613	0	51.1818	15.719	0	18.9794	20.5638	0	0.0958551	12.9856	77.9557	0.142202	0.0270823	0.00808316	4.76239	0	0	0	0	0	0.291429	0.0322723	0.0584424	0.00788441	0.0709587	0.0188463	0	0.243698	0.0567777	0.0165324	0.0312117	0.0296374
7	Fukushima	18	Synthetic resins	0	0	0	0	0	0	0.0817982	0	0.00445304	0.119463	0.168478	0.0324386	0.149887	0	0	0	0	0	0	2.65227	0	0	0	40.4252	0.10567	0	0	0	0.131611	0	0	0	0	0	0.354104	0.0131151	0.0361911	0	0	0.0357418	0	1.32049	0	0.0851021	0.0338243	0.0722661
7	Fukushima	19	Synthetic fibers	0	0	0	0	0.648638	0	8.86403	3.75002	0	0.0344651	0.498424	0	0	0	0	0	0	0	0	0	0	0	0.0346786	0.100833	0.0435512	0	0	0	0.951959	0	0	0	0	0	0	0	0	0	0	0	0	0	0	0	0	0
7	Fukushima	20	Final chemical products	103.256	0	1.30612	0	6.01625	2.01128	0.875851	0.594868	11.003	2.98466	4.74451	6.2104	24.4463	0.410071	0.234759	0	1.27558	0.343274	0	23.4115	6.44263	0.0497501	3.03127	4.35965	7.40601	0.267674	1.77961	0.033197	2.05445	0	0.104642	0.283633	0.0125289	0	0.628664	5.3237	4.12605	1.67301	7.87922	0.258002	0.0108704	2.40609	0.592672	0.72424	0.0213641	0.49702
7	Fukushima	21	Medicaments	14.7308	0	0	0	1.3002	0	0	0.0082704	0	0	0	0	0	0	0	0	0	0	0	0.338891	23.2753	0	0	0	0	0	0	0	0	0	0	0	0	0	0	0	0	0	0	0	0	0	0	0	0	0
7	Fukushima	22	Petroleum refinery products	0.109447	0	0.00301759	0	0.0258162	0.00838114	0.000919312	0.00128552	0.00465435	0.000298358	0.0336042	0.00161295	0.00372643	0.00460917	0.00192246	0	0.00262612	0.00305838	0	0.000693104	0.00261411	0.00175035	0.023498	0.00224607	0.00411461	0.00299648	0.00364334	0.000362472	0.00701633	0	0.00195505	0.00109848	0.0005624	0.00164114	0.00105604	0.00322935	0.00177488	0.00222611	0.00297247	0.00037561	0	0.00051513	9.4299e-05	0.000494239	0	8.61405e-05
7	Fukushima	23	Coal products	0	0	5.40728e-05	0	0	0	0	0	0	0	0	0	0	0.000918745	0.000111768	0	0.00380329	0	0	0	0	0	0	0	0	0	0	0	0.0025725	0	0.00401047	0.00176586	2.98247e-05	0.000197729	0.000115117	0.000157755	0	2.5694e-05	7.70808e-05	0	0	0	0	0	0	0
7	Fukushima	24	Plastic products	88.5603	0	0	0	111.965	66.3535	0.596314	4.14367	4.26076	7.08807	5.25736	1.55682	69.7499	2.21859	0.787464	0	0.613442	0.0696449	0	25.165	37.2577	0	0	374.115	133.333	2.60673	0.213958	0.119736	0.513992	0	0	0	0	0.154076	4.1338	6.7166	2.94341	2.6395	141.947	0.893347	0.0705737	36.0772	2.06057	24.8813	1.04026	8.23163
7	Fukushima	25	Rubber products	9.75674	0	1.57522	0	0.97436	0.133279	0.149988	1.86995	0.257205	0.442969	0.268993	0.263697	1.491	0.25735	0.0357798	0	0.628405	0.0326992	0	0.526065	1.97042	0	0.299999	1.07709	145.925	0	0.207191	0	0.850674	0	1.06855	0.482167	0.0190954	0	0.221112	9.54477	0.87099	15.2662	50.4698	0.766786	0.115974	7.82736	1.30312	2.10416	0.244209	4.57599
7	Fukushima	26	Glass and glass products	0.259247	0	0	0	9.72813	46.4177	0	0.132451	0	9.11156	0	0	0.0299793	0	0.301077	0	0.0367212	0	0	4.81678	15.9972	0	0	8.42514	2.73349	5.61749	0.211327	0	0.270759	0	0	0	0	0	2.10178	2.61269	0.879496	0.276855	0.276851	0	0.0309805	0.259311	0.138452	0.0645023	0.0913311	0.0867245
7	Fukushima	27	Cement and cement products	0.0108599	0	0	0	0	0	0	0	0	0	0	0	0	0	0	0	0	0	0	0	0	0	0.00835542	0	0	0	14.9471	0	0.0378073	0	0	0.0104191	0	0	0	0	0.00727751	0	0	0	0	0	0	0	0	0
7	Fukushima	28	Pottery, china and earthenware	0	0	0	0	0.217114	0.00944941	0	0	0	0.212597	0	0	0	0	0.0101471	0	0	0	0	0	0	0	0	0.0344182	0	0	0.0534173	0.315677	0	0	0	0	0	0	0	0	0.0296414	0.037323	0.0373225	0	0	1.09244	0	0.0195651	0	0.192908
7	Fukushima	29	Other ceramic, stone and clay products	7.5678	0	0	0	1.01201	0	0	0	0.0633229	0.235941	2.05979	0	0.0148015	0.0678842	2.54356	0	0.0543905	0.0905671	0	0.217719	0.803464	0	2.23422	0.350144	0.37566	2.32837	10.7816	1.13666	5.19683	0	0.147243	1.81131	0	7.14628	2.48368	4.25839	2.18723	17.4963	6.66735	0.798683	0	2.04845	0.628885	1.56048	0.0450925	0.242636
7	Fukushima	30	Pig iron and crude steel	0	0	0	0	0	0	0	0	0	0	0	0	0	0	0	0	0	0	0	0	0	0	0	0	0	0	0	0	0	0	9.56669	0.251165	0.0622516	0	0	-0.0440577	-0.079185	-0.0558957	-0.175238	-0.000902764	0	-0.0134422	0	-0.000791923	-0.000747541	-0.00141967
7	Fukushima	31	steel products	0.0298109	0	0.00868491	0	0	0	0.00161256	0	0.00245802	0.120283	0	0	0	0	0	0	0	0	0	0	0	0	0	0.0554538	0.304064	0	0.39016	0	0.0252969	0	3.39104	0.276474	1.53769	0	0.00990512	6.84844	3.81186	2.64295	3.73828	0.245203	0.00118748	1.01548	0.0482925	0.155142	0.0157533	0.0343497
7	Fukushima	32	Cast and forged steel products	0.554623	0	0.0395707	0	0	0	0	0	0	0.233681	0	0	0	0	0	0	0	0	0	0	0	0	0	0	0	0	0.0861154	0.269877	0.1655	0	0	0.988202	0	0	0.758188	36.7501	5.7741	145.46	96.3449	19.1916	0.0378734	27.2977	2.53884	0.98567	0.0372172	0.10602
7	Fukushima	33	Other iron or steel products	0	0	0	0	0	0	0	0	0	1.48615	0	0	0	0	0	0	0	0	0	0.010801	0	0	0	0.0135491	0	0	0.40935	0.010042	0.13471	0	0	0.0791979	0	0	0.148112	37.8877	19.5878	13.1009	8.04653	0.275107	0.00493237	1.77983	0	0.518602	0.121173	0.0782415
7	Fukushima	34	Non-ferrous metals	0	0	0	0	0	0	0.100192	0	0	0.284523	0	0	-1.49934	0	13.0858	0	1.70534	0	0	28.5371	0	0	0	0.709365	-0.100669	3.65426	0	1.97156	2.6599	0	0.532683	1.05512	-0.0637787	143.763	407.415	-5.11648	23.7384	-0.164836	8.35156	0.328342	0	11.0132	0.544053	105.015	0.0543773	0.258173
7	Fukushima	35	Non-ferrous metal products	0	0	0	0	7.77286	3.54781	0.0283919	0	0.113604	1.56415	0	0.0131359	2.59476	0	0	0	0	0	0	0.291875	0.916933	0	0	1.50762	2.03968	0.0175512	0	0.0478876	0.616702	0	0	0	0	0.35946	10.8649	176.614	21.2852	48.3606	54.6345	4.31723	0.0313616	31.6751	5.49407	29.2199	0.631774	4.82853
7	Fukushima	36	Metal products for construction and architecture	0.0275376	0	0	0	0	0	0	0	0.00389242	0.0541451	0	0	0	0	0	0	0	0	0	0	0	0	0	0	0	0	0.0427572	0	0	0	0	0	0	0	0.00836552	3.95507	0.150265	0.22406	0	0.031242	0	0	0	0	0	0.00350934
7	Fukushima	37	Other metal products	8.53992	0	7.53597	0	33.1372	85.7522	0.0516866	1.80626	4.01808	9.70692	1.65399	0.223193	0.718222	0	1.29464	0	1.64669	0.262927	0	9.14757	13.3163	0	0.620286	2.10853	56.8489	0.894642	7.48607	1.02676	3.67992	0	0.0183198	1.01222	0	0.519355	2.32822	96.2195	40.5799	64.7585	123.336	5.01375	0.266434	27.6283	6.29365	2.23871	0.654544	3.3385
7	Fukushima	38	General industrial machinery	0.0966828	0	0.354099	0	0	0	0	0	0	0.0396042	0	0	0	0	0	0	0	0	0	0	0	0	0.00929823	2.10175	0	0	0	0.0548863	0.218782	0	0	0.0850283	0.0177554	0.0252242	0.0942314	0.258267	0.267257	163.891	59.7156	0.731259	0.0539176	2.53587	0.640259	0.0400922	0.121105	0.0934348
7	Fukushima	39	Special industrial machinery	0	0	0	0	0	0	0	0	0	0	0	0	0	0	0	0	0	0	0	0	0	0	0	0	0	0	0	0	0	0	0	0	0	0	0	0	0	1.22347	192.421	0	0	0	0	0.0450073	0	0
7	Fukushima	40	Other general machines	0	0	0.514017	0	0	0	0	0	0.033207	0.736876	0	0	0	0	0	0	0	0	0	0.0117101	0	0	0	0.215445	0	0	0	0.195969	0.24536	0	0	0.107329	0	0	0.285471	0.51074	0.359843	12.7858	34.2897	8.42748	0.010695	3.97861	1.15666	0.222673	0.0840776	0.299388
7	Fukushima	41	Machinery for office and service industry	0	0	0	0	0	0	0	0	0	0	0	0	0	0	0	0	0	0	0	0	0	0	0	0	0	0	0	0	0	0	0	0	0	0	0	0	0	0	0	0	0.116683	0	0	0	0	0
7	Fukushima	42	Industrial electric equipment	0.17967	0	0.00897326	0	0	0	0	0	0.0088887	0.0176636	0	0	0	0	0	0	0	0	0	0	0	0	0	0.00786401	0	0	0	0	0	0	0	0	0	0	0	2.05942	0.0541807	43.7983	38.8603	0.15288	0.0772954	95.2089	3.19334	1.18016	0.278506	1.17804
7	Fukushima	43	Applied electric equipment and electric mesuring instruments	0	0	0	0	0	0	0	0	0	0	0	0	0	0	0	0	0	0	0	0	0	0	0	0	0	0	0	0	0	0	0	0	0	0	0	0	0	0.376032	7.54265	0.0528728	0	7.35483	9.33828	0	0	0
7	Fukushima	44	Other electric equipment	1.01433	0	0.0506585	0	0.0509195	0	0	0	0	0.34902	0	0	0	0	0	0	0	0	0	0.530877	0	0	0	0.0443963	0	0	0	0	0	0	0	0	0	0	0.0539242	0	1.17253	15.791	57.434	0.402773	0.0484857	26.4242	7.10718	39.0167	0.667039	4.29803
7	Fukushima	45	Household electric and electric applications	0	0	0	0	0	0	0	0	0	0	0	0	0	0	0	0	0	0	0	0	0	0	0	0	0	0	0	0	0	0	0	0	0	0	0	0	0	0	0	0	0	0	0	0	0.614462	0
7	Fukushima	46	Communication equipment	0.146773	0	0	0	0	0.0705491	0	0	0	0	0	0	0.0678915	0	0	0	0	0	0	0	0.973481	0	0	0	0.127635	0	0	0	0	0	0	0	0	0	0.0780284	0.285144	0	0.766296	0.348312	0	0	0.0652488	0.125416	0	0	4.45168
7	Fukushima	47	Electric computing equipment and accessory equipment	0	0	0	0	0	0	0	0	0	0	0	0	0	0	0	0	0	0	0	0	0	0	0	0	0	0	0	0	0	0	0	0	0	0	0	0	0	0	0.468702	0	0	0	0	0	0	0.0200212
7	Fukushima	48	Semiconductor devices and integrated circuits	0	0	0	0	0	0	0	0	0	0	0	0	0	0	0	0	0	0	0	0	0	0	0	0	0	0	0	0	0	0	0	0	0	0	0	0	0.0289144	0.0568868	1.02395	0.0163174	0.0206249	3.33758	4.43454	0.00238566	0.146377	1.45837
7	Fukushima	49	Other electrical equipment	0	0	0	0	0	0	0	0	0	0	0	0	1.89948	0	0	0	0	0	0	0	0.0211462	0	0	0	0	0	0	0	0	0	0	0	0	0	0.0711879	0.0216788	1.41331	3.79218	64.1272	0.1266	0.384049	45.1823	58.164	0.0222112	2.15954	29.1068
7	Fukushima	50	Passenger motor cars	0	0	0	0	0	0	0	0	0	0	0	0	0	0	0	0	0	0	0	0	0	0	0	0	0	0	0	0	0	0	0	0	0	0	0	0	0	0	0	0	0	0	0	0	0	0
7	Fukushima	51	Other cars	0	0	0	0	0	0	0	0	0	0	0	0	0	0	0	0	0	0	0	0	0	0	0	0	0	0	0	0	0	0	0	0	0	0	0	0	0	0	0	0	0	0	0	0	0	0
7	Fukushima	52	Motor vheicle parts and accessories	0	0	0	0	0	0	0	0	0	0	0	0	0	0	0	0	0	0	0	0	0	0	0	0	0	0	0	0	0	0	0	0	0	0	0	0	0	0	0.0141539	0	0	0	0	0	0	0
7	Fukushima	53	Other transportation equipment	5.37002	0	0.00593351	0	0	0	0	0	0	0	0	0	0	0	0	0	0	0	0	0	0	0	0	0	0	0	0	0	0	0	0	0	0	0	0	0	0	0	0	0	0	0	0	0	0	0
7	Fukushima	54	Precision instruments	1.57958	0	0	0	0.0466441	0	0	0	0	0	0.339349	0.0744128	0	0	0	0	0	0	0	0.0486303	0.132058	0	0	0.244012	0.0808006	0	0	0.0452127	0.0485212	0	0	0	0	0	0	0.135385	0	15.5235	60.5498	0	0	5.32852	0.754259	0	0	0.580213
7	Fukushima	55	Miscellaneous manufacturing products	3.44167	0	1.00219	0	0.796509	0.594424	0.0100973	8.50692	0.484828	1.19284	0.159784	0.08409	0.0647583	0.0123751	0	0	0	0	0	0.0122121	0	0	0.0673207	0.122553	0.0405816	0.337065	0.0126803	0.386032	0.0243695	0	0	0.235055	0	0	0.905534	0.305983	0.0351816	0.387615	1.06316	0.0132361	0	0.103729	0.19938	0.011611	0	0.0832595
7	Fukushima	56	Reuse and recycling	0.221656	0	0	0	0.304333	0.650183	0.00655864	0	0	0	4.19123	0	0	0.837973	0.0938742	0	0.0236145	0	0	0.00198307	0	0.0082891	0	2.96523	0.00494239	0.235156	0.347986	0.140122	0.0098931	0	0.367875	0.79247	0.192049	2.14314	0.50358	0	0.00190432	0	0	0	0	0	0	0	0	0
7	Fukushima	57	Building construction and repair of construction	0	0	0	0	0	0	0	0	0	0	0	0	0	0	0	0	0	0	0	0	0	0	0	0	0	0	0	0	0	0	0	0	0	0	0	0	0	0	0	0	0	0	0	0	0	0
7	Fukushima	58	Public construction	0	0	0	0	0	0	0	0	0	0	0	0	0	0	0	0	0	0	0	0	0	0	0	0	0	0	0	0	0	0	0	0	0	0	0	0	0	0	0	0	0	0	0	0	0	0
7	Fukushima	59	Other civil enginnering and construction	0	0	0	0	0	0	0	0	0	0	0	0	0	0	0	0	0	0	0	0	0	0	0	0	0	0	0	0	0	0	0	0	0	0	0	0	0	0	0	0	0	0	0	0	0	0
7	Fukushima	60	Electricity	203.121	0	23.5325	0	228.738	39.6654	24.1929	21.653	43.5975	5.19571	144.937	10.4538	53.6046	17.2903	25.8983	0	47.6934	10.5126	0	19.5955	42.0511	2.50738	8.30374	143.696	41.2517	11.8554	17.5092	1.92098	45.5536	0	83.2688	37.2035	5.33222	3.65472	16.4515	72.5517	50.0515	46.5415	115.143	13.6533	0.0608734	34.5341	6.257	36.3745	0.538369	2.78328
7	Fukushima	61	Gas supply and heat supply	0.000296268	0	9.86431e-05	0	0.0870548	0.0202216	0.00111113	0.000645823	0.000488568	0.000291265	0.0722255	0.00118634	0.000730887	0.00618038	0.00101947	0	0.00257386	0.0190997	0	0.0015506	0.0186208	0	0.000455885	0.0153879	0.0121948	0.0118354	0.00107336	0.000961083	0.00216597	0	0.0179951	0.00511634	0.000217633	0.00020612	0.00325507	0.0122789	0.00843779	0.00731213	0.00871819	0.00123245	0	0.00632194	0.000675084	0.00589707	0	8.80968e-05
7	Fukushima	62	Water supply and waste management services	0.0511112	0	0.0118122	0	0.138653	0.0466299	0.00416339	0.00262154	0.00495801	0.000985256	0.0752164	0.00176573	0.0153905	0.0136068	0.00682813	0	0.0224856	0.00510564	0	0.0323103	0.0254485	0	0.0013879	0.0191249	0.0172557	0.00257372	0.037688	0.000975312	0.0125602	0	0.00793175	0.00346139	0.00220855	0.00125503	0.00618029	0.0272577	0.0100738	0.0156018	0.062787	0.0120522	0	0.0146132	0.00154143	0.00977449	0.0001883	0.00107281
7	Fukushima	63	Commerce	18.2451	0	0.440612	0	27.703	4.61714	0.620258	2.44029	1.40474	0.941433	4.95272	0.151402	6.231	0.294895	0.213016	0	0.78549	0.0314745	0	2.47684	0.553767	0.0270314	0.638844	5.96523	1.06913	0.350376	1.46384	0.0637321	0.850431	0	0.49465	0.354453	0.80192	0.331394	0.987955	6.63016	1.86553	7.20411	15.2701	0.988295	0.0248067	5.35677	0.980855	1.78433	0.0951859	0.516957
7	Fukushima	64	Financial and insurance	0.206684	0	0.0370207	0	0.0602333	0.0340286	0.0102495	0.0345311	0.00896194	0.00649932	0.0346484	0.000937991	0.047892	0.00419638	0.00239129	0	0.00746182	0.000319216	0	0.0255279	0.00495688	0.000569397	0.000991236	0.0135109	0.00660901	0.00551442	0.0316833	0.000987856	0.00831805	0	0.00435941	0.00232229	0.0032694	0.00814855	0.00514729	0.0767824	0.0116161	0.0295494	0.0780725	0.0145576	7.46478e-05	0.0307778	0.00249089	0.00992092	0.000317869	0.00320411
7	Fukushima	65	Real estate agencies and rental services	0.000479964	0	0.00055746	0	0.00195556	0.000665282	0.000154568	0.0005064	0.000104919	0.000296283	0.000825506	3.57565e-05	0.00234403	7.6958e-05	6.33745e-05	0	0.000196049	1.57958e-05	0	0.000508246	0.000401888	0	0.000109494	0.00130442	0.000320314	7.1663e-05	0.000837087	2.17254e-05	0.000279782	0	0.000143811	0.000155278	6.76448e-05	0.000116484	0.000249227	0.00278108	0.000566602	0.00133505	0.00301971	0.000563525	0	0.00160276	0.000171679	0.000694292	1.57292e-05	8.46362e-05
7	Fukushima	66	House rent	0	0	0	0	0	0	0	0	0	0	0	0	0	0	0	0	0	0	0	0	0	0	0	0	0	0	0	0	0	0	0	0	0	0	0	0	0	0	0	0	0	0	0	0	0	0
7	Fukushima	67	Transport	40.1593	0.00146237	10.6751	0	13.5978	1.53647	0.403409	0.949299	1.29054	0.601434	4.25821	0.0933212	2.6791	0.367997	0.202309	0	1.13588	0.0137419	0	1.23361	0.312409	0.133255	1.02235	1.1209	0.287876	0.439246	7.16582	0.0283507	0.479889	0	0.392395	0.449727	0.14007	0.346852	1.03623	5.90007	1.72635	3.5472	6.6971	0.7196	0.00759554	1.56349	0.132383	0.31233	0.0360757	0.36973
7	Fukushima	68	Communication	0.00670355	0	0.0014627	0	0.00543985	0.00150159	0.000774516	0.00214138	0.000418575	0.000799799	0.0023324	0.000104244	0.00868522	0.00025888	0.000268744	0	0.000258124	0	0	0.00299754	0.00915747	0	0.000450662	0.00364624	0.00195258	0.000522315	0.00157391	6.33382e-05	0.00110456	0	0.000479162	0.000343426	0.000143426	0.000237719	0.00340807	0.0221428	0.00286215	0.0085412	0.0102864	0.00160598	0	0.00799996	0.00152934	0.00152215	9.17135e-05	0.00104505
7	Fukushima	69	Broadcasting	0	0	0	0	0	0	0	0	0	0	0	0	0	0	0	0	0	0	0	0	0	0	0	0	0	0	0	0	0	0	0	0	0	0	0	0	0	0	0	0	0	0	0	0	0	0
7	Fukushima	70	Information services	0.0218823	0	0.000258448	0	0.0144734	0.00994953	0.00051186	0.00157121	0.000768037	0.00174428	0.0079986	0.000148012	0.00892501	0.00121544	0.000267104	0	0.00171731	6.97447e-05	0	0.00561027	0.00574376	0	0.000426582	0.00815397	0.00225005	0.00126568	0.0031738	0.000215834	0.00212326	0	0.00102051	0.00049648	0.000936764	0.000732913	0.00263318	0.0123873	0.00579619	0.0174738	0.0509118	0.00394196	7.06749e-05	0.0253056	0.00694861	0.0113671	6.94504e-05	0.002506
7	Fukushima	71	﻿Internet based services	3.28039e-05	0	1.63832e-05	0	0.000192122	5.25591e-05	9.46377e-06	7.15081e-05	1.08192e-05	2.6875e-05	4.49275e-05	0	0.000298417	5.79929e-06	5.64399e-06	0	6.19538e-06	0	0	5.72294e-05	0.000186491	0	6.30967e-06	0.00016751	2.85265e-05	1.17006e-05	4.15962e-05	0	1.71303e-05	0	5.03152e-06	1.04908e-05	0	5.70561e-06	9.30099e-05	0.000451419	7.69395e-05	0.000145318	0.000217974	3.1014e-05	0	0.000286801	5.13892e-05	4.8971e-05	0	2.92633e-05
7	Fukushima	72	Image information production and distribution industry	0.00266209	0	0.000981802	0	0.00468758	0.000866175	0.00170142	0.0044192	0.000324184	0.000684481	0.00201929	9.83978e-05	0.00352362	0.00325815	0.000380508	0	0.00046409	0	0	0.00338673	0.00225071	0	0.000330856	0.00333418	0.00331218	0.000745009	0.00373912	0.000159429	0.00273753	0	0.000339216	0.000314342	0.000225637	0.000427402	0.000566093	0.00835439	0.00374626	0.00361558	0.00614252	0.00125454	0	0.0110697	0.00101487	0.00260862	7.69508e-05	0.00164406
7	Fukushima	73	Public administration	0	0	0	0	0	0	0	0	0	0	0	0	0	0	0	0	0	0	0	0	0	0	0	0	0	0	0	0	0	0	0	0	0	0	0	0	0	0	0	0	0	0	0	0	0	0
7	Fukushima	74	Education and Research	0.170644	0	0.0158751	0	1.3513	0.606324	0.047058	0.113509	0.0124149	0.077302	0.847769	0.00669908	0.0742897	0.334504	0.194292	0	0.640767	0.0544527	0	4.50582	2.51009	0.00731987	0.0453722	2.10594	0.624122	0.534365	0.579136	0.0488437	1.14358	0	0.160891	0.138838	0.000921703	0.118721	0.619908	1.70878	0.202639	2.47584	15.6584	0.066431	0.018393	6.94271	1.06929	1.83316	0.0825132	0.545474
7	Fukushima	75	Medical service, health and social security and nursing care	0.00730698	0	0.00199466	0	0.0153104	0.00776615	0.000471361	0.00263409	0.000583778	0.000490804	0.00468258	7.26938e-05	0.00478646	0.000577688	0.000468515	0	0.00123429	4.28177e-05	0	0.00698352	0.0034402	0.000198576	0.000471397	0.00417157	0.00181548	0.00058277	0.00315699	8.83365e-05	0.00104281	0	0.000751812	0.000391884	0.000600102	0.000142089	0.000627322	0.00965478	0.00319343	0.00430822	0.0239103	0.00540648	4.33887e-05	0.00484226	0.000542931	0.000677525	4.2637e-05	0.000931188
7	Fukushima	76	Advertising and survery	0.000474964	0	0.000389269	0	0.0177052	0.0170756	0.000231889	0.000965671	0.000144601	0.000784226	0.00270764	0.00011704	0.00105343	0.000297115	0.000169724	0	0.000172504	1.14897e-05	0	0.0467022	0.00454647	0	2.10824e-05	0.00305435	0.000709568	0.000149864	0.000536084	7.11125e-05	0.000496056	0	0.000201741	0.000105158	8.05155e-05	0.000222414	0.000317247	0.00422329	0.000569241	0.00298843	0.00558372	0.000449048	1.74644e-05	0.00393601	0.000702433	0.000721167	8.00883e-05	0.000619254
7	Fukushima	77	Giids rental and leasing services	0.0538634	0	0.00769688	0	0.0618922	0.0162823	0.00455616	0.00823236	0.00347248	0.00382528	0.0151163	0.000427704	0.0342317	0.000809263	0.00094511	0	0.00311233	0.000143956	0	0.0118194	0.00224095	0	0.00827655	0.0374003	0.0142643	0.00351044	0.0300178	0.000742485	0.032032	0	0.00273829	0.00197631	0.00226979	0.00119429	0.00697626	0.0471338	0.0273015	0.0547517	0.164108	0.0291697	0.000145876	0.108127	0.00528055	0.0116932	0.000573395	0.00884769
7	Fukushima	78	Other business services	0.125386	0	0.0208189	0	0.125061	0.0279961	0.00367199	0.0244793	0.00770296	0.00668176	0.0283576	0.00122056	0.128267	0.00428184	0.00416717	0	0.0147497	0.000349749	0	0.03721	0.0122941	0.000180226	0.00527666	0.0685823	0.0173369	0.0159998	0.0488439	0.000601302	0.0226717	0	0.00382869	0.00818045	0.00177011	0.00790951	0.0151536	0.113594	0.023932	0.0621318	0.144203	0.0159357	0.000236276	0.080718	0.0117911	0.0184475	0.00104482	0.011244
7	Fukushima	79	Personal services	0.134521	0	0.00239941	0	0.0458236	0.00923708	0	0.0049091	0.0011884	0	0.0131597	0	0.0188894	0	0	0	0.00136102	0	0	0.00880063	0.00227606	0	0	0.0126168	0.00313339	0	0.00391628	0	0.00125441	0	0	0	0	0.00250685	0.00255409	0.0198338	0.00482923	0.0148218	0.0228024	0.0027253	0	0.0277651	0.00205261	0.00717207	0	0.00107144
7	Fukushima	80	Activities not elsewhere classified	0	0	0	0	0	0	0	0	0	0	0	0	0	0	0	0	0	0	0	0	0	0	0	0	0	0	0	0	0	0	0	0	0	0	0	0	0	0	0	0	0	0	0	0	0	0
8	Ibaraki	1	Agriculture, forestry and fishery	392.491	0	0.0071495	0	808.332	17.9729	2.8992	0.0234041	87.0111	0	0.882268	0	0	0.0379614	0.0517228	0	0.09733	0	0	0.112385	0.963035	0	0.090865	0	11.2474	0	0	0	0.00747551	0	0	0	0	0	0	0	0	0	0	0	0	0	0	0	0	0
8	Ibaraki	2	Metallic ores	0	0	0	0	0	0	0	0	0	0	0	0	0	0	0	0	0	0	0	0	0	0	0	0	0	0	0	0	0	0	0	0	0	0	0	0	0	0	0	0	0	0	0	0	0	0
8	Ibaraki	3	Non-metallic ores	0.0888997	0	0.0270255	0	0	0	0	0	0	0	0.705826	0	0	0.348491	0.331179	0	0.0262795	0	0	0.0121378	0.0183115	-0.0169117	2.498	0	0.0470569	1.32351	14.7666	0.349827	2.83386	0	0	0.0185415	0	0.0766397	0.012329	0.0262819	0.00777051	0	0	0.00877033	0	0	0	0	0	0
8	Ibaraki	4	Coal mining, crude petroleum and natural gas	0	0	0	0	0	0	0	0	0	0	0	0	0	0	0	0	0	0	0	0	0	0	0	0	0	0	0	0	0	0	0	0	0	0	0	0	0	0	0	0	0	0	0	0	0	0
8	Ibaraki	5	Food and Tobacco	942.317	0	0	0	1409.93	111.765	-0.0223853	0.993712	0.102366	0	8.76135	0.0207137	0	0.0823045	0.0534003	0	0.498247	0	0	1.48905	12.5964	0	0	0.113206	0	0	0	0.0503419	0.432206	0	0	0	0	0	0	0	0	0	0	0	0	0	0	0	0	0
8	Ibaraki	6	Beverage	8.412	0	0	0	12.3822	130.313	0	0	0	0	0	0	0	0	0	0	0	0	0	0	0.303957	0	0	0	0	0	0	0	0	0	0	0	0	0	0	0	0	0	0	0	0	0	0	0	0	0
8	Ibaraki	7	Textile products	7.67167	0	0	0	0.0660204	0.105358	34.3558	138.683	0.238565	1.68081	3.84254	0.0526621	0.669165	0.30225	0	0	0	0	0	0	0	0	0	0.748315	24.398	0.0234545	0	0	0.160247	0	0	0	0	0	0.349581	0.425832	0.176262	0.124842	14.0653	0	0	0	0	0	0.164735	0.0195533
8	Ibaraki	8	Wearing aparel and other textile products	13.3666	0	0.994112	0	5.36297	1.01732	0.0763242	3.64559	0.51107	0.247707	0.94322	0.504463	0.291368	0.320712	0.0260103	0	0.0571028	0	0	0.342864	0.680394	0	0.872344	0.198506	0.536813	0.215689	0.451855	0.110343	0.513142	0	0.127533	0.132953	0.027763	0.0525886	0.348267	1.01571	0.557191	0.693615	1.23175	0.157221	0	2.43063	0.430595	0.125379	0.0236706	0.449533
8	Ibaraki	9	Timber and wooden products	12.8432	0	0.226387	0	3.053	0.472077	0	0.21615	75.8537	26.9238	101.866	0.151259	0.0524185	0.0200339	0	0	0.0428045	0	0	0.0988508	0	0	0	0.396802	0.0985461	0.687145	0.123168	1.06608	0.650951	0	0	0.235565	0	0	1.10449	4.03622	1.15809	0.0537865	0.143429	0.0428557	0	0.25189	0.0484163	0	0	0.0336971
8	Ibaraki	10	Furniture and fixtures	0.500493	0	0.674894	0	3.11548	0.817938	0	0.818254	0.321887	9.29957	0.936799	0.160329	0.60192	0.0796323	0.0774998	0	0.226856	0.0472181	0	1.04779	1.7309	0	0.0288802	1.55533	1.74093	0	0.407981	0.267891	0.418174	0	0.184239	0.120044	0	0.0522307	0.611971	0.55909	0.352162	0.593873	3.53944	0.056782	0	1.04573	0.53458	0.124526	0.0470188	0.98224
8	Ibaraki	11	Pulp, paper, paperboard, building paper	0.574588	0	0	0	1.19815	0.29743	0.229522	0.137296	1.8805	1.73811	167.372	63.3538	67.5901	0	-0.00912546	0	0	0.283552	0	5.68141	0.65331	0	0	1.85717	2.55213	1.31481	0	0.292496	0.027697	0	0	0	0.00974035	0	0.159782	0.137388	0.106628	0.0167826	0.0167824	0.0601738	0	0.675922	0.030214	0.0175952	0.0166091	0.181371
8	Ibaraki	12	Paper products	236.71	0	0	0	153.365	71.3342	0.88334	4.48056	0.486227	3.79059	5.62583	0.272459	2.93752	1.76424	0.234135	0	0.599688	0.106988	0	29.9533	34.5631	0	0.0436251	6.05554	3.94464	7.40216	0.0410852	4.23058	2.56618	0	0	0	0.708083	0	0.0803839	0.110157	5.54758	0.251182	0.179413	0.385975	0	4.94056	0.969013	0.188103	0.248586	0.606979
8	Ibaraki	13	Publishing, printing	0.103228	0	0.0191834	0	11.3235	0.814666	0.0768764	0.47883	0.0831364	0.153408	0.059182	0.146117	11.5442	0.0280107	0.0322171	0	0.0136017	0.00905945	0	1.38964	0.468576	0	0.0110821	0.0735524	0.294356	0.236332	0.0417477	0.0163541	0.0225654	0	0.0220931	0.0391546	0.00264523	0.0125265	0.18378	0.268173	0.345076	0.321319	0.558313	0.0599194	0.00229507	0.241193	0.151799	0.0023892	0.0315743	0.164899
8	Ibaraki	14	Chemical fertilizer	124.08	0	0	0	0	0.0156334	0	0	0	0	0	0	0	21.1998	0.956898	0	3.26171	0.0153423	0	0.306405	0.600932	0	0	0	0.0707085	0	0	0	0.0509529	0	0	0	0	0	0	0	0	0	0	0	0	0	0	0.0161846	0	0
8	Ibaraki	15	Basic inorganic chemical products	9.36641	0	0.0619584	0	74.1725	9.42165	1.34214	3.70152	0	0.182945	65.8108	0.645795	0.0573844	37.0429	43.735	0	35.707	2.51638	0	118.431	66.296	0	0.214758	16.1812	93.8033	26.0187	0.876438	2.41465	1.23089	0	1.1417	0.357067	0.0683483	4.1429	1.97858	13.316	2.05758	2.59081	6.65357	0.844483	0	3.5848	0.530031	1.04946	0.0582734	1.66003
8	Ibaraki	16	Basic organic chemical products	0	0	0	0	0.0542612	0	0	0	0	0	0.148037	0	0.549978	6.0766	0	0	473.644	5.35371	0	8.37262	0.972949	0	0	0.0473099	1.22194	0.693969	0	0	0.11289	0	0	0.0518511	0	0	0	0	0	0.256514	0	0	0	0	0	0	0	0
8	Ibaraki	17	Organic chemical products	0.553078	0	0.110489	0	95.5103	94.3223	3.54225	0.180845	1.20393	1.52247	54.1348	0.531525	3.47931	4.22396	17.1285	0	681.631	209.343	0	252.764	273.866	0	1.27658	172.94	1038.2	1.89383	0.360678	0.10765	63.4247	0	0	0	0	0	3.8812	0.429797	0.778327	0.105003	0.945017	0.250992	0	3.24553	0.756156	0.220176	0.415672	0.394706
8	Ibaraki	18	Synthetic resins	0	0	0	0	0	0	1.88567	0	0.102654	2.75393	3.88387	0.747797	3.4553	0	0	0	0	0	0	61.1419	0	0	0	931.908	2.43597	0	0	0	3.03398	0	0	0	0	0	8.16305	0.302338	0.834301	0	0	0.823943	0	30.4407	0	1.96183	0.77974	1.66593
8	Ibaraki	19	Synthetic fibers	0	0	0	0	0	0	0	0	0	0	0	0	0	0	0	0	0	0	0	0	0	0	0	0	0	0	0	0	0	0	0	0	0	0	0	0	0	0	0	0	0	0	0	0	0	0
8	Ibaraki	20	Final chemical products	325.545	0	4.11794	0	18.9681	6.34117	2.76139	1.87551	34.6904	9.41006	14.9585	19.5802	77.0746	1.29288	0.74015	0	4.02167	1.08228	0	73.812	20.3124	0.156853	9.55701	13.7452	23.3497	0.843926	5.61076	0.104664	6.47729	0	0.329915	0.89424	0.0395011	0	1.98206	16.7846	13.0086	5.27468	24.8417	0.813432	0.0342722	7.58595	1.86858	2.28339	0.0673569	1.56701
8	Ibaraki	21	Medicaments	38.4929	0	0	0	3.39754	0	0	0.0216112	0	0	0	0	0	0	0	0	0	0	0	0.885552	60.8204	0	0	0	0	0	0	0	0	0	0	0	0	0	0	0	0	0	0	0	0	0	0	0	0	0
8	Ibaraki	22	Petroleum refinery products	409.257	0	11.2837	0	96.5349	31.3397	3.43759	4.80695	17.404	1.11565	125.656	6.03131	13.9343	17.2351	7.18868	0	9.81989	11.4362	0	2.59173	9.77497	6.54509	87.8663	8.39874	15.3858	11.2048	13.6236	1.35539	26.2362	0	7.31054	4.10757	2.10299	6.13672	3.94885	12.0755	6.63683	8.32413	11.115	1.40452	0	1.92623	0.352613	1.84811	0	0.322106
8	Ibaraki	23	Coal products	0	0	0.105289	0	0	0	0	0	0	0	0	0	0	1.78896	0.217631	0	7.40568	0	0	0	0	0	0	0	0	0	0	0	5.00911	0	7.80909	3.43844	0.0580739	0.385013	0.224153	0.307176	0	0.0500306	0.15009	0	0	0	0	0	0	0
8	Ibaraki	24	Plastic products	279.561	0	0	0	353.443	209.46	1.8824	13.0805	13.4501	22.3751	16.5961	4.91448	220.182	7.00348	2.48581	0	1.93647	0.21985	0	79.4391	117.612	0	0	1180.98	420.896	8.22875	0.675408	0.377975	1.62254	0	0	0	0	0.486378	13.0493	21.2025	9.29157	8.3322	448.089	2.82006	0.222782	113.886	6.50468	78.5436	3.28384	25.985
8	Ibaraki	25	Rubber products	8.99858	0	1.45282	0	0.898646	0.122922	0.138333	1.72465	0.237219	0.408547	0.24809	0.243206	1.37514	0.237353	0.0329995	0	0.579574	0.0301583	0	0.485186	1.81731	0	0.276687	0.993394	134.585	0	0.191091	0	0.784572	0	0.98552	0.444699	0.0176115	0	0.20393	8.80309	0.803309	14.0799	46.548	0.707202	0.106962	7.21912	1.20186	1.94065	0.225233	4.22041
8	Ibaraki	26	Glass and glass products	0.321867	0	0	0	12.0779	57.6297	0	0.164444	0	11.3124	0	0	0.0372206	0	0.373801	0	0.045591	0	0	5.98025	19.8612	0	0	10.4602	3.39375	6.97437	0.262373	0	0.336159	0	0	0	0	0	2.60946	3.24377	1.09194	0.343728	0.343723	0	0.0384637	0.321946	0.171894	0.0800826	0.113392	0.107672
8	Ibaraki	27	Cement and cement products	0.0638907	0	0	0	0	0	0	0	0	0	0	0	0	0	0	0	0	0	0	0	0	0	0.0491562	0	0	0	87.936	0	0.222426	0	0	0.0612972	0	0	0	0	0.0428147	0	0	0	0	0	0	0	0	0
8	Ibaraki	28	Pottery, china and earthenware	0	0	0	0	0.176318	0.00767385	0	0	0	0.17265	0	0	0	0	0.00824046	0	0	0	0	0	0	0	0	0.027951	0	0	0.0433802	0.256361	0	0	0	0	0	0	0	0	0.0240718	0.03031	0.0303096	0	0	0.887165	0	0.0158888	0	0.156661
8	Ibaraki	29	Other ceramic, stone and clay products	21.025	0	0	0	2.81158	0	0	0	0.175924	0.655494	5.72253	0	0.0411218	0.188597	7.06654	0	0.151109	0.251615	0	0.604871	2.23219	0	6.20714	0.972774	1.04366	6.4687	29.9535	3.15788	14.4379	0	0.409071	5.03221	0	19.8539	6.90021	11.8307	6.07659	48.6086	18.5233	2.21891	0	5.69104	1.74718	4.33533	0.125277	0.674094
8	Ibaraki	30	Pig iron and crude steel	0	0	0	0	0	0	0	0	0	0	0	0	0	0	0	0	0	0	0	0	0	0	0	0	0	0	0	0	0	0	91.638	2.40588	0.596299	0	0	-0.422022	-0.758502	-0.535417	-1.67858	-0.00864745	0	-0.128761	0	-0.00758572	-0.00716059	-0.0135988
8	Ibaraki	31	steel products	4.17813	0	1.21723	0	0	0	0.226007	0	0.344503	16.8582	0	0	0	0	0	0	0	0	0	0	0	0	0	7.77211	42.6159	0	54.6827	0	3.54548	0	475.27	38.7491	215.514	0	1.38825	959.842	534.25	370.421	523.937	34.3664	0.166432	142.324	6.76842	21.7439	2.2079	4.81426
8	Ibaraki	32	Cast and forged steel products	0.407839	0	0.0290981	0	0	0	0	0	0	0.171837	0	0	0	0	0	0	0	0	0	0	0	0	0	0	0	0	0.0633246	0.198453	0.1217	0	0	0.72667	0	0	0.55753	27.024	4.24596	106.963	70.8468	14.1124	0.02785	20.0732	1.86692	0.724808	0.0273675	0.0779614
8	Ibaraki	33	Other iron or steel products	0	0	0	0	0	0	0	0	0	6.53648	0	0	0	0	0	0	0	0	0	0.0475059	0	0	0	0.0595926	0	0	1.80043	0.0441673	0.592492	0	0	0.348334	0	0	0.651436	166.641	86.1524	57.6213	35.3908	1.21	0.0216939	7.82816	0	2.28096	0.532951	0.344128
8	Ibaraki	34	Non-ferrous metals	0	0	0	0	0	0	0.0618713	0	0	0.1757	0	0	-0.925879	0	8.08081	0	1.05309	0	0	17.6224	0	0	0	0.438051	-0.0621658	2.2566	0	1.21749	1.64256	0	0.328945	0.651561	-0.039385	88.7776	251.589	-3.15956	14.6591	-0.10179	5.1573	0.20276	0	6.80092	0.335967	64.8497	0.0335794	0.159429
8	Ibaraki	35	Non-ferrous metal products	0	0	0	0	36.0563	16.4574	0.131703	0	0.52698	7.2557	0	0.060934	12.0364	0	0	0	0	0	0	1.35394	4.25342	0	0	6.99345	9.46157	0.0814157	0	0.222138	2.86073	0	0	0	0	1.66745	50.3997	819.269	98.7365	224.332	253.436	20.0265	0.145479	146.933	25.4856	135.544	2.93064	22.3983
8	Ibaraki	36	Metal products for construction and architecture	0.16323	0	0	0	0	0	0	0	0.0230724	0.320947	0	0	0	0	0	0	0	0	0	0	0	0	0	0	0	0	0.253445	0	0	0	0	0	0	0	0.0495869	23.4438	0.890701	1.32813	0	0.185188	0	0	0	0	0	0.0208017
8	Ibaraki	37	Other metal products	18.6858	0	16.4891	0	72.5061	187.631	0.113093	3.9522	8.79179	21.2393	3.61902	0.488358	1.57151	0	2.83274	0	3.60306	0.575299	0	20.0154	29.1368	0	1.35722	4.61358	124.389	1.95753	16.3799	2.24662	8.05188	0	0.0400848	2.2148	0	1.13638	5.09428	210.534	88.7912	141.695	269.866	10.9704	0.582972	60.4523	13.7709	4.89842	1.43218	7.30483
8	Ibaraki	38	General industrial machinery	0.589156	0	2.15777	0	0	0	0	0	0	0.241336	0	0	0	0	0	0	0	0	0	0	0	0	0.0566606	12.8075	0	0	0	0.33446	1.33319	0	0	0.518137	0.108196	0.153709	0.574218	1.5738	1.62858	998.704	363.889	4.45607	0.328558	15.4528	3.90154	0.24431	0.737977	0.569363
8	Ibaraki	39	Special industrial machinery	0	0	0	0	0	0	0	0	0	0	0	0	0	0	0	0	0	0	0	0	0	0	0	0	0	0	0	0	0	0	0	0	0	0	0	0	0	6.83592	1075.12	0	0	0	0	0.251471	0	0
8	Ibaraki	40	Other general machines	0	0	0.454587	0	0	0	0	0	0.0293676	0.651678	0	0	0	0	0	0	0	0	0	0.0103562	0	0	0	0.190535	0	0	0	0.173311	0.216992	0	0	0.09492	0	0	0.252465	0.451689	0.318238	11.3075	30.3252	7.45309	0.00945844	3.5186	1.02293	0.196928	0.0743566	0.264773
8	Ibaraki	41	Machinery for office and service industry	0	0	0	0	0	0	0	0	0	0	0	0	0	0	0	0	0	0	0	0	0	0	0	0	0	0	0	0	0	0	0	0	0	0	0	0	0	0	0	0	2.12964	0	0	0	0	0
8	Ibaraki	42	Industrial electric equipment	0.736698	0	0.0367929	0	0	0	0	0	0.0364462	0.0724258	0	0	0	0	0	0	0	0	0	0	0	0	0	0.0322446	0	0	0	0	0	0	0	0	0	0	0	8.44419	0.222156	179.585	159.338	0.626851	0.316933	390.383	13.0936	4.839	1.14195	4.8303
8	Ibaraki	43	Applied electric equipment and electric mesuring instruments	0	0	0	0	0	0	0	0	0	0	0	0	0	0	0	0	0	0	0	0	0	0	0	0	0	0	0	0	0	0	0	0	0	0	0	0	0	1.12286	22.523	0.157883	0	21.9621	27.8849	0	0	0
8	Ibaraki	44	Other electric equipment	0.418158	0	0.020884	0	0.0209916	0	0	0	0	0.143884	0	0	0	0	0	0	0	0	0	0.218854	0	0	0	0.0183024	0	0	0	0	0	0	0	0	0	0	0.0222303	0	0.483376	6.50984	23.6772	0.166043	0.0199883	10.8934	2.92994	16.0847	0.274987	1.77187
8	Ibaraki	45	Household electric and electric applications	0	0	0	0	0	0	0	0	0	0	0	0	0	0	0	0	0	0	0	0	0	0	0	0	0	0	0	0	0	0	0	0	0	0	0	0	0	0	0	0	0	0	0	0	3.75016	0
8	Ibaraki	46	Communication equipment	0.0135714	0	0	0	0	0.00652333	0	0	0	0	0	0	0.00627759	0	0	0	0	0	0	0	0.090013	0	0	0	0.0118018	0	0	0	0	0	0	0	0	0	0.0072149	0.0263658	0	0.0708556	0.0322067	0	0	0.00603324	0.0115966	0	0	0.411625
8	Ibaraki	47	Electric computing equipment and accessory equipment	0	0	0	0	0	0	0	0	0	0	0	0	0	0	0	0	0	0	0	0	0	0	0	0	0	0	0	0	0	0	0	0	0	0	0	0	0	0	0.0123244	0	0	0	0	0	0	0.000526453
8	Ibaraki	48	Semiconductor devices and integrated circuits	0	0	0	0	0	0	0	0	0	0	0	0	0	0	0	0	0	0	0	0	0	0	0	0	0	0	0	0	0	0	0	0	0	0	0	0	0.00832662	0.016382	0.294872	0.00469899	0.00593947	0.961141	1.27704	0.000687009	0.0421529	0.419974
8	Ibaraki	49	Other electrical equipment	0	0	0	0	0	0	0	0	0	0	0	0	2.59161	0	0	0	0	0	0	0	0.0288514	0	0	0	0	0	0	0	0	0	0	0	0	0	0.0971273	0.0295782	1.92829	5.17397	87.4939	0.17273	0.523989	61.6457	79.3578	0.0303045	2.94643	39.7127
8	Ibaraki	50	Passenger motor cars	0	0	0	0	0	0	0	0	0	0	0	0	0	0	0	0	0	0	0	0	0	0	0	0	0	0	0	0	0	0	0	0	0	0	0	0	0	0	0	0	0	0	0	0	0	0
8	Ibaraki	51	Other cars	0	0	0	0	0	0	0	0	0	0	0	0	0	0	0	0	0	0	0	0	0	0	0	0	0	0	0	0	0	0	0	0	0	0	0	0	0	0	0	0	0	0	0	0	0	0
8	Ibaraki	52	Motor vheicle parts and accessories	0	0	0	0	0	0	0	0	0	0	0	0	0	0	0	0	0	0	0	0	0	0	0	0	0	0	0	0	0	0	0	0	0	0	0	0	0	0	0.00878224	0	0	0	0	0	0	0
8	Ibaraki	53	Other transportation equipment	3.96294	0	0.00437878	0	0	0	0	0	0	0	0	0	0	0	0	0	0	0	0	0	0	0	0	0	0	0	0	0	0	0	0	0	0	0	0	0	0	0	0	0	0	0	0	0	0	0
8	Ibaraki	54	Precision instruments	1.30508	0	0	0	0.0385382	0	0	0	0	0	0.280377	0.0614811	0	0	0	0	0	0	0	0.0401792	0.109109	0	0	0.201607	0.0667589	0	0	0.0373555	0.0400891	0	0	0	0	0	0	0.111857	0	12.8258	50.0273	0	0	4.40252	0.623182	0	0	0.479382
8	Ibaraki	55	Miscellaneous manufacturing products	7.03625	0	2.04891	0	1.62841	1.21526	0.0206433	17.3918	0.991199	2.43869	0.326667	0.171916	0.132394	0.0253	0	0	0	0	0	0.0249669	0	0	0.137633	0.250552	0.0829664	0.689108	0.0259239	0.789217	0.0498217	0	0	0.480553	0	0	1.8513	0.625561	0.0719263	0.792454	2.17356	0.0270603	0	0.212068	0.407619	0.0237379	0	0.170219
8	Ibaraki	56	Reuse and recycling	1.50009	0	0	0	2.05961	4.4002	0.0443865	0	0	0	28.3647	0	0	5.67109	0.635307	0	0.159815	0	0	0.0134207	0	0.0560976	0	20.0676	0.0334483	1.59145	2.35504	0.948292	0.0669529	0	2.48965	5.36315	1.29972	14.504	3.40805	0	0.0128878	0	0	0	0	0	0	0	0	0
8	Ibaraki	57	Building construction and repair of construction	0	0	0	0	0	0	0	0	0	0	0	0	0	0	0	0	0	0	0	0	0	0	0	0	0	0	0	0	0	0	0	0	0	0	0	0	0	0	0	0	0	0	0	0	0	0
8	Ibaraki	58	Public construction	0	0	0	0	0	0	0	0	0	0	0	0	0	0	0	0	0	0	0	0	0	0	0	0	0	0	0	0	0	0	0	0	0	0	0	0	0	0	0	0	0	0	0	0	0	0
8	Ibaraki	59	Other civil enginnering and construction	0	0	0	0	0	0	0	0	0	0	0	0	0	0	0	0	0	0	0	0	0	0	0	0	0	0	0	0	0	0	0	0	0	0	0	0	0	0	0	0	0	0	0	0	0	0
8	Ibaraki	60	Electricity	26.3677	0	3.05483	0	29.6932	5.14909	3.14055	2.81084	5.65952	0.674471	18.8148	1.35703	6.95858	2.24451	3.36194	0	6.19123	1.36468	0	2.54375	5.45879	0.32549	1.07793	18.6536	5.35501	1.53899	2.27292	0.249368	5.91346	0	10.8094	4.8295	0.692193	0.47443	2.13562	9.41816	6.49734	6.04169	14.9471	1.77238	0.00790217	4.48298	0.81224	4.72189	0.0698873	0.361306
8	Ibaraki	61	Gas supply and heat supply	0	0	0	0	0	0	0	0	0	0	0	0	0	0	0	0	0	0	0	0	0	0	0	0	0	0	0	0	0	0	0	0	0	0	0	0	0	0	0	0	0	0	0	0	0	0
8	Ibaraki	62	Water supply and waste management services	0.0625897	0	0.014465	0	0.169792	0.0571021	0.0050984	0.00321028	0.00607148	0.00120652	0.0921084	0.00216227	0.0188468	0.0166626	0.00836158	0	0.0275354	0.00625226	0	0.0395665	0.0311637	0	0.0016996	0.02342	0.021131	0.00315172	0.046152	0.00119435	0.0153809	0	0.00971306	0.00423875	0.00270454	0.00153689	0.00756825	0.0333793	0.0123362	0.0191057	0.0768877	0.0147588	0	0.017895	0.0018876	0.0119696	0.000230588	0.00131375
8	Ibaraki	63	Commerce	3.76845	0	0.0910064	0	5.72194	0.953649	0.128111	0.504032	0.290143	0.194449	1.02296	0.0312714	1.28699	0.0609092	0.0439975	0	0.162239	0.00650092	0	0.51158	0.114378	0.00558321	0.13195	1.23209	0.220824	0.0723685	0.302349	0.0131636	0.175653	0	0.102168	0.0732106	0.165633	0.068448	0.204058	1.36943	0.385316	1.48798	3.15397	0.204128	0.0051237	1.10642	0.202591	0.368544	0.0196602	0.106775
8	Ibaraki	64	Financial and insurance	0	0	0	0	0	0	0	0	0	0	0	0	0	0	0	0	0	0	0	0	0	0	0	0	0	0	0	0	0	0	0	0	0	0	0	0	0	0	0	0	0	0	0	0	0	0
8	Ibaraki	65	Real estate agencies and rental services	0	0	0	0	0	0	0	0	0	0	0	0	0	0	0	0	0	0	0	0	0	0	0	0	0	0	0	0	0	0	0	0	0	0	0	0	0	0	0	0	0	0	0	0	0	0
8	Ibaraki	66	House rent	0	0	0	0	0	0	0	0	0	0	0	0	0	0	0	0	0	0	0	0	0	0	0	0	0	0	0	0	0	0	0	0	0	0	0	0	0	0	0	0	0	0	0	0	0	0
8	Ibaraki	67	Transport	49.2938	0.001795	13.1033	0	16.6907	1.88595	0.495167	1.16522	1.58408	0.738234	5.22677	0.114548	3.28848	0.4517	0.248326	0	1.39424	0.0168676	0	1.5142	0.383469	0.163565	1.25489	1.37586	0.353355	0.539156	8.79574	0.0347992	0.589044	0	0.481648	0.55202	0.17193	0.425746	1.27193	7.24209	2.11902	4.35404	8.22041	0.883279	0.00932319	1.91912	0.162495	0.383371	0.0442814	0.453827
8	Ibaraki	68	Communication	0	0	0	0	0	0	0	0	0	0	0	0	0	0	0	0	0	0	0	0	0	0	0	0	0	0	0	0	0	0	0	0	0	0	0	0	0	0	0	0	0	0	0	0	0	0
8	Ibaraki	69	Broadcasting	0	0	0	0	0	0	0	0	0	0	0	0	0	0	0	0	0	0	0	0	0	0	0	0	0	0	0	0	0	0	0	0	0	0	0	0	0	0	0	0	0	0	0	0	0	0
8	Ibaraki	70	Information services	0	0	0	0	0	0	0	0	0	0	0	0	0	0	0	0	0	0	0	0	0	0	0	0	0	0	0	0	0	0	0	0	0	0	0	0	0	0	0	0	0	0	0	0	0	0
8	Ibaraki	71	﻿Internet based services	0	0	0	0	0	0	0	0	0	0	0	0	0	0	0	0	0	0	0	0	0	0	0	0	0	0	0	0	0	0	0	0	0	0	0	0	0	0	0	0	0	0	0	0	0	0
8	Ibaraki	72	Image information production and distribution industry	0	0	0	0	0	0	0	0	0	0	0	0	0	0	0	0	0	0	0	0	0	0	0	0	0	0	0	0	0	0	0	0	0	0	0	0	0	0	0	0	0	0	0	0	0	0
8	Ibaraki	73	Public administration	0	0	0	0	0	0	0	0	0	0	0	0	0	0	0	0	0	0	0	0	0	0	0	0	0	0	0	0	0	0	0	0	0	0	0	0	0	0	0	0	0	0	0	0	0	0
8	Ibaraki	74	Education and Research	0.161377	0	0.015013	0	1.27792	0.573399	0.0445025	0.107345	0.0117407	0.0731043	0.801732	0.00633529	0.0702555	0.316339	0.183741	0	0.605971	0.0514957	0	4.26114	2.37378	0.00692238	0.0429083	1.99158	0.59023	0.505347	0.547687	0.0461913	1.08148	0	0.152154	0.131299	0.000871652	0.112274	0.586245	1.61598	0.191635	2.34139	14.8081	0.0628236	0.0173942	6.56569	1.01122	1.73361	0.0780324	0.515853
8	Ibaraki	75	Medical service, health and social security and nursing care	0.066339	0	0.0181092	0	0.139001	0.0705078	0.00427942	0.0239146	0.00530003	0.00445594	0.0425125	0.000659977	0.0434556	0.00524475	0.00425358	0	0.0112059	0.000388735	0	0.0634023	0.0312331	0.00180284	0.00427974	0.037873	0.0164825	0.00529088	0.0286619	0.000801994	0.00946749	0	0.0068256	0.00355786	0.00544824	0.00129001	0.00569537	0.0876544	0.0289927	0.0391137	0.217078	0.0490847	0.00039392	0.0439622	0.0049292	0.00615116	0.000387095	0.00845412
8	Ibaraki	76	Advertising and survery	0.0405902	0	0.0332667	0	1.51307	1.45927	0.0198171	0.0825256	0.0123575	0.0670195	0.231393	0.0100021	0.0900255	0.0253913	0.0145045	0	0.0147421	0.0009819	0	3.99114	0.388539	0	0.00180169	0.261023	0.0606392	0.0128073	0.0458134	0.00607723	0.0423926	0	0.0172407	0.00898673	0.0068808	0.0190074	0.0271117	0.36092	0.048647	0.25539	0.477182	0.0383754	0.00149249	0.336369	0.0600295	0.0616305	0.00684429	0.0529211
8	Ibaraki	77	Giids rental and leasing services	0.53762	0	0.0768238	0	0.617756	0.162516	0.0454757	0.0821684	0.0346593	0.0381807	0.150878	0.00426898	0.341672	0.00807738	0.00943329	0	0.0310646	0.00143685	0	0.117971	0.0223673	0	0.0826096	0.373298	0.142374	0.0350383	0.299613	0.00741085	0.319717	0	0.0273313	0.0197259	0.0226551	0.0119204	0.0696312	0.47045	0.272501	0.546485	1.63799	0.291148	0.00145601	1.07923	0.052706	0.116711	0.00572314	0.0883102
8	Ibaraki	78	Other business services	0.000557172	0	9.25123e-05	0	0.000555727	0.000124405	1.63171e-05	0.000108778	3.42294e-05	2.96915e-05	0.000126012	5.42378e-06	0.000569976	1.9027e-05	1.85175e-05	0	6.55429e-05	1.55417e-06	0	0.000165349	5.46308e-05	8.00864e-07	2.34477e-05	0.000304757	7.70394e-05	7.10977e-05	0.000217046	2.67199e-06	0.000100745	0	1.70134e-05	3.63511e-05	7.86577e-06	3.51472e-05	6.73374e-05	0.000504773	0.000106346	0.000276093	0.00064079	7.08129e-05	1.04993e-06	0.000358684	5.23956e-05	8.19747e-05	4.64283e-06	4.99647e-05
8	Ibaraki	79	Personal services	0.225328	0	0.00401912	0	0.0767565	0.0154725	0	0.00822295	0.00199062	0	0.0220431	0	0.0316405	0	0	0	0.00227977	0	0	0.0147414	0.00381249	0	0	0.0211337	0.00524857	0	0.00655993	0	0.00210119	0	0	0	0	0.00419909	0.00427821	0.0332225	0.00808917	0.0248271	0.038195	0.00456499	0	0.0465077	0.0034382	0.0120135	0	0.00179471
8	Ibaraki	80	Activities not elsewhere classified	0.480104	0	0.0231365	0	1.92388	0.595143	0.636042	1.16189	0.327109	0.931572	1.89187	0.106242	0.20844	0.178686	0.35215	0	0.849462	0.405267	0	0.974244	0.0159614	0.552797	0.0048603	0.101382	0.0292983	0.549786	1.47848	0.0348375	0.501423	0	1.12784	0.0121215	0.721593	0.00878999	0.190307	2.02089	1.97906	0.861517	3.37606	1.72724	0.0301965	0.230282	0.0305882	1.28045	0.0771506	0.14464
9	Tochigi	1	Agriculture, forestry and fishery	222.999	0	0.00406208	0	459.264	10.2115	1.64721	0.0132973	49.4364	0	0.501271	0	0	0.0215682	0.0293869	0	0.0552992	0	0	0.0638528	0.54716	0	0.0516261	0	6.39035	0	0	0	0.0042473	0	0	0	0	0	0	0	0	0	0	0	0	0	0	0	0	0
9	Tochigi	2	Metallic ores	0	0	0	0	0	0	0	0	0	0	0	0	0	0	0	0	0	0	0	0	0	0	0	0	0	0	0	0	0	0	0	0	0	0	0	0	0	0	0	0	0	0	0	0	0	0
9	Tochigi	3	Non-metallic ores	0.0967515	0	0.0294125	0	0	0	0	0	0	0	0.768165	0	0	0.37927	0.360429	0	0.0286006	0	0	0.0132098	0.0199288	-0.0184053	2.71863	0	0.051213	1.4404	16.0708	0.380724	3.08415	0	0	0.0201791	0	0.0834087	0.0134179	0.0286032	0.00845681	0	0	0.00954494	0	0	0	0	0	0
9	Tochigi	4	Coal mining, crude petroleum and natural gas	0	0	0	0	0	0	0	0	0	0	0	0	0	0	0	0	0	0	0	0	0	0	0	0	0	0	0	0	0	0	0	0	0	0	0	0	0	0	0	0	0	0	0	0	0	0
9	Tochigi	5	Food and Tobacco	569.066	0	0	0	851.456	67.4949	-0.0135185	0.600103	0.0618186	0	5.29098	0.012509	0	0.0497037	0.0322485	0	0.300891	0	0	0.899238	7.60698	0	0	0.0683652	0	0	0	0.0304015	0.26101	0	0	0	0	0	0	0	0	0	0	0	0	0	0	0	0	0
9	Tochigi	6	Beverage	5.04213	0	0	0	7.42187	78.1093	0	0	0	0	0	0	0	0	0	0	0	0	0	0	0.182191	0	0	0	0	0	0	0	0	0	0	0	0	0	0	0	0	0	0	0	0	0	0	0	0	0
9	Tochigi	7	Textile products	1.71505	0	0	0	0.0147593	0.0235534	7.68047	31.0035	0.0533327	0.375757	0.859024	0.011773	0.149596	0.0675698	0	0	0	0	0	0	0	0	0	0.167291	5.45433	0.0052434	0	0	0.0358242	0	0	0	0	0	0.0781511	0.0951974	0.0394045	0.0279091	3.14439	0	0	0	0	0	0.0368276	0.00437126
9	Tochigi	8	Wearing aparel and other textile products	6.79135	0	0.505093	0	2.72484	0.516885	0.0387792	1.85227	0.259667	0.125856	0.479236	0.25631	0.14804	0.162949	0.0132155	0	0.0290131	0	0	0.174204	0.345698	0	0.443225	0.100858	0.272747	0.109588	0.229581	0.0560636	0.26072	0	0.0647975	0.0675517	0.014106	0.0267195	0.176949	0.516066	0.2831	0.352416	0.625833	0.0798816	0	1.23497	0.218779	0.0637035	0.0120267	0.228401
9	Tochigi	9	Timber and wooden products	3.70547	0	0.0653159	0	0.880836	0.136201	0	0.0623624	21.8849	7.76793	29.3898	0.0436405	0.0151235	0.00578009	0	0	0.0123497	0	0	0.02852	0	0	0	0.114484	0.028432	0.198252	0.0355358	0.307581	0.187809	0	0	0.0679642	0	0	0.318663	1.16451	0.334126	0.0155182	0.0413813	0.0123645	0	0.0726742	0.0139688	0	0	0.00972213
9	Tochigi	10	Furniture and fixtures	0.286265	0	0.386017	0	1.78195	0.467833	0	0.468014	0.184108	5.31904	0.535818	0.091703	0.344278	0.045547	0.0443273	0	0.129754	0.0270072	0	0.599298	0.990018	0	0.0165185	0.889599	0.995751	0	0.233352	0.153225	0.239181	0	0.105379	0.0686612	0	0.0298742	0.350027	0.319781	0.201425	0.339676	2.02444	0.0324774	0	0.598124	0.305762	0.0712247	0.0268932	0.561809
9	Tochigi	11	Pulp, paper, paperboard, building paper	0.129993	0	0	0	0.271067	0.0672899	0.0519266	0.0310615	0.42544	0.393225	37.866	14.333	15.2914	0	-0.00206452	0	0	0.0641502	0	1.28535	0.147803	0	0	0.420162	0.577389	0.297459	0	0.0661736	0.00626612	0	0	0	0.00220364	0	0.0361487	0.0310824	0.0241233	0.00379686	0.00379681	0.0136136	0	0.152919	0.00683554	0.00398071	0.00375762	0.041033
9	Tochigi	12	Paper products	138.084	0	0	0	89.4655	41.6127	0.515295	2.61373	0.28364	2.21124	3.28182	0.158939	1.7136	1.02916	0.136582	0	0.349827	0.0624114	0	17.4732	20.1623	0	0.0254486	3.53249	2.3011	4.31804	0.023967	2.4679	1.49697	0	0	0	0.413059	0	0.0468918	0.0642598	3.23617	0.146526	0.10466	0.225158	0	2.88207	0.565272	0.10973	0.145012	0.35408
9	Tochigi	13	Publishing, printing	0.0495764	0	0.00921298	0	5.43819	0.39125	0.0369205	0.229962	0.039927	0.0736755	0.0284227	0.0701738	5.54421	0.0134524	0.0154725	0	0.00653235	0.00435088	0	0.667384	0.225038	0	0.00532229	0.0353242	0.141367	0.1135	0.0200497	0.0078542	0.0108372	0	0.0106104	0.0188043	0.00127039	0.00601595	0.088262	0.128792	0.165725	0.154316	0.268134	0.0287768	0.00110223	0.115835	0.0729025	0.00114744	0.0151638	0.0791944
9	Tochigi	14	Chemical fertilizer	66.6587	0	0	0	0	0.00839859	0	0	0	0	0	0	0	11.389	0.514066	0	1.75226	0.0082422	0	0.164608	0.322834	0	0	0	0.0379861	0	0	0	0.027373	0	0	0	0	0	0	0	0	0	0	0	0	0	0	0.0086947	0	0
9	Tochigi	15	Basic inorganic chemical products	0.0717489	0	0.000474616	0	0.568179	0.0721721	0.0102811	0.0283545	0	0.0014014	0.504127	0.00494694	0.000439578	0.283757	0.33502	0	0.273524	0.019276	0	0.90721	0.507843	0	0.0016451	0.123952	0.718556	0.19931	0.00671372	0.0184968	0.0094289	0	0.00874567	0.00273522	0.000523564	0.0317356	0.0151564	0.102004	0.0157616	0.0198462	0.0509679	0.00646894	0	0.0274604	0.00406016	0.00803914	0.000446388	0.0127162
9	Tochigi	16	Basic organic chemical products	0	0	0	0	0	0	0	0	0	0	0	0	0	0	0	0	0	0	0	0	0	0	0	0	0	0	0	0	0	0	0	0	0	0	0	0	0	0	0	0	0	0	0	0	0	0
9	Tochigi	17	Organic chemical products	0.0042696	0	0.000852944	0	0.73731	0.728139	0.027345	0.00139607	0.00929398	0.011753	0.417904	0.00410321	0.0268592	0.0326077	0.132227	0	5.26198	1.61606	0	1.95126	2.11416	0	0.00985483	1.33505	8.01459	0.0146198	0.00278432	0.000831026	0.489619	0	0	0	0	0	0.0299617	0.0033179	0.00600844	0.000810593	0.00729524	0.00193758	0	0.0250545	0.00583729	0.00169969	0.00320886	0.00304701
9	Tochigi	18	Synthetic resins	0	0	0	0	0	0	0.071253	0	0.00387896	0.104062	0.146758	0.0282567	0.130564	0	0	0	0	0	0	2.31035	0	0	0	35.2137	0.0920471	0	0	0	0.114644	0	0	0	0	0	0.308454	0.0114243	0.0315254	0	0	0.031134	0	1.15025	0	0.074131	0.0294638	0.0629497
9	Tochigi	19	Synthetic fibers	0	0	0	0	0.391326	0	5.34771	2.26241	0	0.0207929	0.300702	0	0	0	0	0	0	0	0	0	0	0	0.0209217	0.0608331	0.0262747	0	0	0	0.574322	0	0	0	0	0	0	0	0	0	0	0	0	0	0	0	0	0
9	Tochigi	20	Final chemical products	152.346	0	1.92708	0	8.87654	2.96749	1.29226	0.877686	16.2341	4.40365	7.00018	9.163	36.0688	0.605031	0.34637	0	1.88203	0.506476	0	34.542	9.50563	0.0734027	4.47242	6.43235	10.927	0.394934	2.62568	0.0489798	3.03119	0	0.154391	0.41848	0.0184854	0	0.927548	7.85473	6.08769	2.4684	11.6252	0.380664	0.0160385	3.55001	0.874446	1.06856	0.0315212	0.733317
9	Tochigi	21	Medicaments	79.5624	0	0	0	7.02249	0	0	0.0446691	0	0	0	0	0	0	0	0	0	0	0	1.83038	125.712	0	0	0	0	0	0	0	0	0	0	0	0	0	0	0	0	0	0	0	0	0	0	0	0	0
9	Tochigi	22	Petroleum refinery products	0.258938	0	0.00713924	0	0.061078	0.0198287	0.00217498	0.00304137	0.0110116	0.000705879	0.0795033	0.00381604	0.00881626	0.0109047	0.00454831	0	0.00621308	0.00723574	0	0.0016398	0.00618466	0.0041411	0.0555933	0.00531392	0.00973466	0.00708931	0.00861969	0.000857563	0.0165998	0	0.00462541	0.00259887	0.00133057	0.00388273	0.00249846	0.00764025	0.00419915	0.00526671	0.00703251	0.000888646	0	0.00121873	0.0002231	0.00116931	0	0.000203798
9	Tochigi	23	Coal products	0	0	0.00476176	0	0	0	0	0	0	0	0	0	0	0.0809066	0.0098425	0	0.334926	0	0	0	0	0	0	0	0	0	0	0	0.22654	0	0.35317	0.155505	0.00262643	0.0174124	0.0101374	0.0138922	0	0.00226266	0.00678789	0	0	0	0	0	0	0
9	Tochigi	24	Plastic products	178.569	0	0	0	225.762	133.793	1.20238	8.35513	8.59123	14.2921	10.6007	3.13912	140.641	4.47347	1.58781	0	1.23692	0.140429	0	50.7417	75.1249	0	0	754.35	268.847	5.25611	0.431416	0.241431	1.03639	0	0	0	0	0.310674	8.33523	13.5431	5.93498	5.32219	286.217	1.80131	0.142302	72.7446	4.15486	50.1697	2.09755	16.5979
9	Tochigi	25	Rubber products	12.1371	0	1.95954	0	1.21208	0.165795	0.186581	2.32618	0.319957	0.551042	0.33462	0.328033	1.85476	0.320137	0.0445092	0	0.781721	0.040677	0	0.654411	2.45116	0	0.373191	1.33987	181.527	0	0.25774	0	1.05822	0	1.32925	0.599803	0.0237542	0	0.275058	11.8735	1.08349	18.9908	62.7832	0.953863	0.144268	9.73703	1.62105	2.61752	0.30379	5.69242
9	Tochigi	26	Glass and glass products	0.0524067	0	0	0	1.96654	9.38333	0	0.0267749	0	1.8419	0	0	0.00606031	0	0.0608627	0	0.00742319	0	0	0.973711	3.23382	0	0	1.70314	0.552575	1.13557	0.0427198	0	0.0547339	0	0	0	0	0	0.424876	0.528155	0.17779	0.0559662	0.0559654	0	0.0062627	0.0524197	0.027988	0.0130391	0.0184626	0.0175314
9	Tochigi	27	Cement and cement products	0.0244192	0	0	0	0	0	0	0	0	0	0	0	0	0	0	0	0	0	0	0	0	0	0.0187877	0	0	0	33.6095	0	0.085012	0	0	0.023428	0	0	0	0	0.0163639	0	0	0	0	0	0	0	0	0
9	Tochigi	28	Pottery, china and earthenware	0	0	0	0	0.113123	0.00492344	0	0	0	0.11077	0	0	0	0	0.00528697	0	0	0	0	0	0	0	0	0.017933	0	0	0.0278321	0.164478	0	0	0	0	0	0	0	0	0.0154441	0.0194465	0.0194462	0	0	0.569194	0	0.0101941	0	0.100511
9	Tochigi	29	Other ceramic, stone and clay products	4.68472	0	0	0	0.626467	0	0	0	0.039199	0.146055	1.27508	0	0.00916263	0.0420226	1.57455	0	0.0336696	0.0560641	0	0.134775	0.497371	0	1.38306	0.216751	0.232546	1.44134	6.67415	0.703629	3.21701	0	0.0911481	1.12126	0	4.42379	1.53748	2.63608	1.35397	10.8308	4.12731	0.494412	0	1.26806	0.389301	0.965986	0.0279138	0.1502
9	Tochigi	30	Pig iron and crude steel	0	0	0	0	0	0	0	0	0	0	0	0	0	0	0	0	0	0	0	0	0	0	0	0	0	0	0	0	0	0	266.502	6.99679	1.73416	0	0	-1.22733	-2.20588	-1.5571	-4.88167	-0.0251486	0	-0.374463	0	-0.0220608	-0.0208245	-0.0395482
9	Tochigi	31	steel products	0.260211	0	0.0758082	0	0	0	0.0140756	0	0.0214554	1.04991	0	0	0	0	0	0	0	0	0	0	0	0	0	0.484041	2.65409	0	3.4056	0	0.22081	0	29.5994	2.41327	13.4221	0	0.0864591	59.7782	33.2727	23.0696	32.6304	2.14031	0.0103652	8.86382	0.421532	1.35419	0.137506	0.299829
9	Tochigi	32	Cast and forged steel products	0.179475	0	0.012805	0	0	0	0	0	0	0.0756191	0	0	0	0	0	0	0	0	0	0	0	0	0	0	0	0	0.0278669	0.0873319	0.0535558	0	0	0.319781	0	0	0.245349	11.8923	1.8685	47.0706	31.1771	6.21038	0.0122558	8.83352	0.821567	0.318962	0.0120435	0.034308
9	Tochigi	33	Other iron or steel products	0	0	0	0	0	0	0	0	0	6.45291	0	0	0	0	0	0	0	0	0	0.0468985	0	0	0	0.0588306	0	0	1.77741	0.0436026	0.584916	0	0	0.34388	0	0	0.643107	164.51	85.0508	56.8846	34.9383	1.19453	0.0214165	7.72807	0	2.25179	0.526137	0.339727
9	Tochigi	34	Non-ferrous metals	0	0	0	0	0	0	0.0345563	0	0	0.098132	0	0	-0.517122	0	4.51329	0	0.588172	0	0	9.84245	0	0	0	0.24466	-0.0347208	1.26036	0	0.679991	0.917401	0	0.183722	0.36391	-0.0219973	49.5841	140.517	-1.76468	8.18737	-0.0568519	2.88046	0.113245	0	3.79845	0.187644	36.2198	0.0187548	0.089044
9	Tochigi	35	Non-ferrous metal products	0	0	0	0	19.1128	8.72378	0.0698133	0	0.279343	3.84613	0	0.0323001	6.38031	0	0	0	0	0	0	0.717698	2.25466	0	0	3.70711	5.01541	0.0431571	0	0.117752	1.51642	0	0	0	0	0.883884	26.716	434.28	52.3385	118.915	134.342	10.6157	0.0771157	77.8867	13.5095	71.8495	1.55348	11.873
9	Tochigi	36	Metal products for construction and architecture	0.101442	0	0	0	0	0	0	0	0.0143388	0.199459	0	0	0	0	0	0	0	0	0	0	0	0	0	0	0	0	0.157508	0	0	0	0	0	0	0	0.0308167	14.5696	0.553544	0.825389	0	0.115089	0	0	0	0	0	0.0129276
9	Tochigi	37	Other metal products	10.4088	0	9.18515	0	40.389	104.518	0.0629977	2.20154	4.8974	11.8312	2.01595	0.272036	0.875398	0	1.57796	0	2.00706	0.320466	0	11.1494	16.2304	0	0.75603	2.56996	69.2897	1.09043	9.12433	1.25146	4.48524	0	0.0223289	1.23374	0	0.633011	2.83773	117.276	49.4605	78.9303	150.327	6.11096	0.32474	33.6745	7.67096	2.72863	0.797784	4.0691
9	Tochigi	38	General industrial machinery	0.102547	0	0.375576	0	0	0	0	0	0	0.0420063	0	0	0	0	0	0	0	0	0	0	0	0	0.0098622	2.22923	0	0	0	0.0582154	0.232051	0	0	0.0901856	0.0188323	0.0267541	0.0999469	0.273931	0.283467	173.832	63.3376	0.775613	0.0571879	2.68967	0.679093	0.042524	0.128451	0.099102
9	Tochigi	39	Special industrial machinery	0	0	0	0	0	0	0	0	0	0	0	0	0	0	0	0	0	0	0	0	0	0	0	0	0	0	0	0	0	0	0	0	0	0	0	0	0	2.41997	380.6	0	0	0	0	0.0890226	0	0
9	Tochigi	40	Other general machines	0	0	0.487113	0	0	0	0	0	0.0314689	0.698307	0	0	0	0	0	0	0	0	0	0.0110972	0	0	0	0.204168	0	0	0	0.185711	0.232518	0	0	0.101712	0	0	0.270529	0.484007	0.341008	12.1166	32.495	7.98637	0.0101352	3.77036	1.09612	0.211018	0.0796769	0.283718
9	Tochigi	41	Machinery for office and service industry	0	0	0	0	0	0	0	0	0	0	0	0	0	0	0	0	0	0	0	0	0	0	0	0	0	0	0	0	0	0	0	0	0	0	0	0	0	0	0	0	0.600313	0	0	0	0	0
9	Tochigi	42	Industrial electric equipment	0.169025	0	0.00844161	0	0	0	0	0	0.00836206	0.0166171	0	0	0	0	0	0	0	0	0	0	0	0	0	0.00739808	0	0	0	0	0	0	0	0	0	0	0	1.9374	0.0509706	41.2033	36.5578	0.143822	0.0727157	89.5679	3.00413	1.11024	0.262005	1.10825
9	Tochigi	43	Applied electric equipment and electric mesuring instruments	0	0	0	0	0	0	0	0	0	0	0	0	0	0	0	0	0	0	0	0	0	0	0	0	0	0	0	0	0	0	0	0	0	0	0	0	0	0.918039	18.4145	0.129083	0	17.956	22.7984	0	0	0
9	Tochigi	44	Other electric equipment	0.693544	0	0.0346376	0	0.034816	0	0	0	0	0.238641	0	0	0	0	0	0	0	0	0	0.362985	0	0	0	0.0303558	0	0	0	0	0	0	0	0	0	0	0.0368705	0	0.801713	10.797	39.2703	0.275395	0.0331519	18.0674	4.85951	26.6775	0.456085	2.93877
9	Tochigi	45	Household electric and electric applications	0	0	0	0	0	0	0	0	0	0	0	0	0	0	0	0	0	0	0	0	0	0	0	0	0	0	0	0	0	0	0	0	0	0	0	0	0	0	0	0	0	0	0	0	3.69904	0
9	Tochigi	46	Communication equipment	0.191371	0	0	0	0	0.0919854	0	0	0	0	0	0	0.0885203	0	0	0	0	0	0	0	1.26927	0	0	0	0.166417	0	0	0	0	0	0	0	0	0	0.101737	0.371785	0	0.999135	0.454146	0	0	0.0850746	0.163523	0	0	5.80432
9	Tochigi	47	Electric computing equipment and accessory equipment	0	0	0	0	0	0	0	0	0	0	0	0	0	0	0	0	0	0	0	0	0	0	0	0	0	0	0	0	0	0	0	0	0	0	0	0	0	0	0.0112714	0	0	0	0	0	0	0.000481474
9	Tochigi	48	Semiconductor devices and integrated circuits	0	0	0	0	0	0	0	0	0	0	0	0	0	0	0	0	0	0	0	0	0	0	0	0	0	0	0	0	0	0	0	0	0	0	0	0	0.0111973	0.0220298	0.396532	0.00631902	0.00798716	1.2925	1.71731	0.000923862	0.0566856	0.564764
9	Tochigi	49	Other electrical equipment	0	0	0	0	0	0	0	0	0	0	0	0	1.9021	0	0	0	0	0	0	0	0.0211753	0	0	0	0	0	0	0	0	0	0	0	0	0	0.0712859	0.0217087	1.41526	3.7974	64.2155	0.126774	0.384578	45.2445	58.2441	0.0222418	2.16251	29.1469
9	Tochigi	50	Passenger motor cars	0	0	0	0	0	0	0	0	0	0	0	0	0	0	0	0	0	0	0	0	0	0	0	0	0	0	0	0	0	0	0	0	0	0	0	0	0	0	0	0	0	0	0	0	0	0
9	Tochigi	51	Other cars	0	0	0	0	0	0	0	0	0	0	0	0	0	0	0	0	0	0	0	0	0	0	0	0	0	0	0	0	0	0	0	0	0	0	0	0	0	0	0	0	0	0	0	0	0	0
9	Tochigi	52	Motor vheicle parts and accessories	0	0	0	0	0	0	0	0	0	0	0	0	0	0	0	0	0	0	0	0	0	0	0	0	0	0	0	0	0	0	0	0	0	0	0	0	0	0	0.0208713	0	0	0	0	0	0	0
9	Tochigi	53	Other transportation equipment	26.1625	0	0.0289078	0	0	0	0	0	0	0	0	0	0	0	0	0	0	0	0	0	0	0	0	0	0	0	0	0	0	0	0	0	0	0	0	0	0	0	0	0	0	0	0	0	0	0
9	Tochigi	54	Precision instruments	1.15867	0	0	0	0.034215	0	0	0	0	0	0.248924	0.0545842	0	0	0	0	0	0	0	0.0356719	0.0968689	0	0	0.178991	0.0592699	0	0	0.033165	0.0355919	0	0	0	0	0	0	0.0993091	0	11.387	44.4153	0	0	3.90864	0.553273	0	0	0.425605
9	Tochigi	55	Miscellaneous manufacturing products	3.08544	0	0.898457	0	0.714067	0.532898	0.00905222	7.62641	0.434646	1.06938	0.143246	0.0753863	0.0580555	0.0110942	0	0	0	0	0	0.0109481	0	0	0.0603527	0.109869	0.0363812	0.302178	0.0113678	0.346076	0.0218471	0	0	0.210725	0	0	0.811807	0.274312	0.0315401	0.347495	0.953117	0.0118661	0	0.0929929	0.178743	0.0104092	0	0.0746418
9	Tochigi	56	Reuse and recycling	0.514417	0	0	0	0.706292	1.50894	0.0152212	0	0	0	9.72697	0	0	1.94476	0.217862	0	0.0548044	0	0	0.00460229	0	0.0192373	0	6.88168	0.0114703	0.545747	0.807602	0.325193	0.0229598	0	0.853761	1.83916	0.445706	4.97378	1.1687	0	0.00441953	0	0	0	0	0	0	0	0	0
9	Tochigi	57	Building construction and repair of construction	0	0	0	0	0	0	0	0	0	0	0	0	0	0	0	0	0	0	0	0	0	0	0	0	0	0	0	0	0	0	0	0	0	0	0	0	0	0	0	0	0	0	0	0	0	0
9	Tochigi	58	Public construction	0	0	0	0	0	0	0	0	0	0	0	0	0	0	0	0	0	0	0	0	0	0	0	0	0	0	0	0	0	0	0	0	0	0	0	0	0	0	0	0	0	0	0	0	0	0
9	Tochigi	59	Other civil enginnering and construction	0	0	0	0	0	0	0	0	0	0	0	0	0	0	0	0	0	0	0	0	0	0	0	0	0	0	0	0	0	0	0	0	0	0	0	0	0	0	0	0	0	0	0	0	0	0
9	Tochigi	60	Electricity	0.0318539	0	0.00369044	0	0.0358713	0.00622044	0.003794	0.00339568	0.00683708	0.000814805	0.0227295	0.00163939	0.00840642	0.00271152	0.00406144	0	0.00747941	0.00164862	0	0.00307301	0.00659457	0.000393214	0.00130222	0.0225348	0.00646921	0.0018592	0.00274583	0.000301253	0.00714385	0	0.0130584	0.00583435	0.000836214	0.000573143	0.00257996	0.0113778	0.00784921	0.00729876	0.0180571	0.00214115	9.54634e-06	0.00541573	0.000981239	0.00570435	8.44285e-05	0.000436481
9	Tochigi	61	Gas supply and heat supply	0.000209776	0	6.98454e-05	0	0.0616401	0.0143182	0.000786751	0.000457282	0.000345936	0.000206233	0.0511401	0.000840002	0.000517513	0.00437609	0.000721848	0	0.00182245	0.0135238	0	0.00109792	0.0131846	0	0.000322794	0.0108956	0.00863465	0.00838022	0.000760003	0.000680506	0.00153364	0	0.0127416	0.00362268	0.000154097	0.000145946	0.00230478	0.0086942	0.00597447	0.00517743	0.00617301	0.000872649	0	0.00447632	0.000478001	0.00417549	0	6.23779e-05
9	Tochigi	62	Water supply and waste management services	0.272178	0	0.0629026	0	0.738358	0.248314	0.0221709	0.0139603	0.0264025	0.0052467	0.400543	0.00940287	0.0819574	0.0724591	0.0363612	0	0.119741	0.0271886	0	0.172059	0.135519	0	0.00739088	0.101844	0.0918904	0.0137056	0.200697	0.00519374	0.0668857	0	0.0422383	0.0184327	0.011761	0.00668331	0.0329113	0.145153	0.053645	0.0830831	0.334354	0.0641803	0	0.0778182	0.00820843	0.0520512	0.00100274	0.00571296
9	Tochigi	63	Commerce	12.4789	0	0.301359	0	18.9476	3.15791	0.424229	1.66905	0.96078	0.643898	3.38744	0.103552	4.26173	0.201695	0.145694	0	0.53724	0.0215271	0	1.69405	0.378752	0.0184882	0.43694	4.07995	0.731236	0.239641	1.0012	0.0435899	0.581656	0	0.338319	0.24243	0.548477	0.226659	0.675717	4.53473	1.27594	4.92729	10.4441	0.67595	0.0169666	3.66379	0.670861	1.2204	0.0651029	0.353575
9	Tochigi	64	Financial and insurance	0.128383	0	0.0229956	0	0.0374143	0.0211371	0.00636654	0.0214492	0.00556677	0.00403709	0.0215221	0.000582639	0.0297484	0.00260661	0.00148537	0	0.00463496	0.000198283	0	0.0158568	0.003079	0.000353684	0.000615712	0.00839236	0.00410523	0.00342532	0.0196803	0.000613613	0.00516681	0	0.00270787	0.00144251	0.0020308	0.00506152	0.00319727	0.0476939	0.00721542	0.0183548	0.0484952	0.00904257	4.63679e-05	0.0191178	0.00154723	0.00616244	0.000197446	0.00199025
9	Tochigi	65	Real estate agencies and rental services	0	0	0	0	0	0	0	0	0	0	0	0	0	0	0	0	0	0	0	0	0	0	0	0	0	0	0	0	0	0	0	0	0	0	0	0	0	0	0	0	0	0	0	0	0	0
9	Tochigi	66	House rent	0	0	0	0	0	0	0	0	0	0	0	0	0	0	0	0	0	0	0	0	0	0	0	0	0	0	0	0	0	0	0	0	0	0	0	0	0	0	0	0	0	0	0	0	0	0
9	Tochigi	67	Transport	15.8327	0.000576537	4.20865	0	5.3609	0.605749	0.159043	0.374259	0.508792	0.237114	1.67879	0.0367917	1.05623	0.145082	0.07976	0	0.447818	0.0054177	0	0.486347	0.123167	0.0525356	0.40306	0.441912	0.113494	0.173172	2.82511	0.0111772	0.189195	0	0.154701	0.177304	0.0552223	0.136746	0.408531	2.32609	0.680611	1.39848	2.64032	0.283701	0.00299452	0.616403	0.0521918	0.123135	0.0142228	0.145765
9	Tochigi	68	Communication	0.0108014	0	0.00235683	0	0.00876518	0.00241951	0.00124797	0.00345039	0.000674446	0.00128871	0.00375817	0.000167968	0.0139944	0.000417132	0.000433026	0	0.000415914	0	0	0.00482991	0.0147554	0	0.000726148	0.00587516	0.00314618	0.000841602	0.00253602	0.000102056	0.00177977	0	0.00077207	0.000553359	0.000231102	0.000383034	0.0054914	0.0356785	0.00461176	0.0137624	0.0165743	0.0025877	0	0.0128903	0.00246422	0.00245263	0.000147777	0.00168388
9	Tochigi	69	Broadcasting	0	0	0	0	0	0	0	0	0	0	0	0	0	0	0	0	0	0	0	0	0	0	0	0	0	0	0	0	0	0	0	0	0	0	0	0	0	0	0	0	0	0	0	0	0	0
9	Tochigi	70	Information services	0.596605	0	0.0070464	0	0.394607	0.271267	0.0139555	0.042838	0.02094	0.0475565	0.218076	0.00403544	0.243334	0.0331381	0.00728241	0	0.0468212	0.00190154	0	0.15296	0.1566	0	0.0116305	0.222312	0.061346	0.0345079	0.0865314	0.00588457	0.0578892	0	0.0278235	0.0135362	0.0255402	0.0199824	0.0717919	0.337731	0.158029	0.47641	1.38808	0.107475	0.0019269	0.68994	0.189449	0.309917	0.00189352	0.0683245
9	Tochigi	71	﻿Internet based services	0.000483851	0	0.000241649	0	0.00283376	0.000775236	0.000139589	0.00105473	0.000159581	0.0003964	0.00066267	0	0.00440159	8.55383e-05	8.32476e-05	0	9.13805e-05	0	0	0.000844121	0.00275071	0	9.30663e-05	0.00247073	0.000420759	0.000172581	0.000613535	0	0.000252668	0	7.42138e-05	0.000154737	0	8.41565e-05	0.00137188	0.00665833	0.00113484	0.00214341	0.00321506	0.00045745	0	0.00423026	0.00075798	0.000722312	0	0.000431627
9	Tochigi	72	Image information production and distribution industry	0.00189309	0	0.000698187	0	0.00333347	0.000615961	0.00120992	0.00314262	0.000230536	0.000486754	0.00143597	6.99735e-05	0.00250575	0.00231696	0.00027059	0	0.000330028	0	0	0.0024084	0.00160054	0	0.000235281	0.00237103	0.00235539	0.000529797	0.002659	0.000113374	0.00194673	0	0.000241226	0.000223537	0.000160457	0.000303938	0.000402564	0.00594104	0.00266407	0.00257114	0.00436812	0.000892142	0	0.00787201	0.000721705	0.00185506	5.47219e-05	0.00116914
9	Tochigi	73	Public administration	0	0	0	0	0	0	0	0	0	0	0	0	0	0	0	0	0	0	0	0	0	0	0	0	0	0	0	0	0	0	0	0	0	0	0	0	0	0	0	0	0	0	0	0	0	0
9	Tochigi	74	Education and Research	0.0568952	0	0.00529301	0	0.450543	0.202158	0.0156899	0.0378455	0.00413932	0.0257737	0.28266	0.00223358	0.0247693	0.111529	0.0647799	0	0.213642	0.0181554	0	1.50231	0.836903	0.00244056	0.0151278	0.702154	0.208092	0.178166	0.193093	0.0162853	0.381289	0	0.0536435	0.0462908	0.00030731	0.0395833	0.206687	0.569733	0.0675631	0.825483	5.22075	0.0221491	0.00613251	2.31481	0.356518	0.611203	0.0275112	0.18187
9	Tochigi	75	Medical service, health and social security and nursing care	0.044906	0	0.0122584	0	0.0940919	0.0477279	0.00289681	0.0161881	0.00358768	0.0030163	0.0287774	0.000446749	0.0294158	0.00355026	0.00287932	0	0.00758548	0.000263141	0	0.0429181	0.0211422	0.00122037	0.00289703	0.0256369	0.0111573	0.00358148	0.0194017	0.000542883	0.0064087	0	0.00462036	0.00240837	0.003688	0.000873227	0.00385528	0.0593347	0.0196256	0.0264767	0.146944	0.0332262	0.000266651	0.0297587	0.00333665	0.00416382	0.000262031	0.00572273
9	Tochigi	76	Advertising and survery	0.0754307	0	0.0618212	0	2.81182	2.71184	0.036827	0.153361	0.0229645	0.124546	0.430009	0.0185875	0.167299	0.0471859	0.0269544	0	0.027396	0.00182471	0	7.41694	0.722041	0	0.00334817	0.485072	0.112689	0.0238005	0.0851373	0.0112936	0.0787803	0	0.0320392	0.0167005	0.0127869	0.0353223	0.0503831	0.670715	0.0904032	0.474603	0.88677	0.0713149	0.00277357	0.625091	0.111556	0.114531	0.0127191	0.0983458
9	Tochigi	77	Giids rental and leasing services	0.81307	0	0.116185	0	0.934264	0.245782	0.0687753	0.124268	0.0524171	0.0577426	0.22818	0.00645619	0.516728	0.0122158	0.0142665	0	0.0469807	0.00217302	0	0.178414	0.0338272	0	0.124935	0.564558	0.21532	0.0529902	0.45312	0.0112078	0.483524	0	0.0413345	0.0298325	0.0342625	0.0180278	0.105307	0.711486	0.412117	0.826478	2.47721	0.440318	0.002202	1.63217	0.07971	0.176509	0.00865541	0.133556
9	Tochigi	78	Other business services	0.373901	0	0.0620821	0	0.372931	0.0834844	0.0109499	0.0729974	0.0229703	0.0199251	0.0845626	0.00363973	0.382493	0.0127685	0.0124265	0	0.0439838	0.00104295	0	0.11096	0.036661	0.000537435	0.015735	0.204513	0.0516988	0.0477114	0.145653	0.00179309	0.067607	0	0.0114172	0.0243941	0.00527847	0.0235862	0.045188	0.338738	0.0713653	0.185277	0.430015	0.0475204	0.000704576	0.240701	0.035161	0.0550107	0.00311566	0.0335298
9	Tochigi	79	Personal services	0.172321	0	0.00307364	0	0.0587	0.0118327	0	0.00628855	0.00152234	0	0.0168576	0	0.0241973	0	0	0	0.00174347	0	0	0.0112736	0.00291562	0	0	0.0161621	0.00401387	0	0.00501675	0	0.0016069	0	0	0	0	0.00321128	0.00327179	0.0254071	0.00618624	0.0189867	0.0292099	0.00349111	0	0.0355671	0.00262939	0.00918741	0	0.00137251
9	Tochigi	80	Activities not elsewhere classified	0	0	0	0	0	0	0	0	0	0	0	0	0	0	0	0	0	0	0	0	0	0	0	0	0	0	0	0	0	0	0	0	0	0	0	0	0	0	0	0	0	0	0	0	0	0
10	Gunma	1	Agriculture, forestry and fishery	219.675	0	0.00400154	0	452.419	10.0594	1.62267	0.0130992	48.6996	0	0.493801	0	0	0.0212468	0.028949	0	0.0544751	0	0	0.0629012	0.539005	0	0.0508567	0	6.29512	0	0	0	0.00418401	0	0	0	0	0	0	0	0	0	0	0	0	0	0	0	0	0
10	Gunma	2	Metallic ores	0	0	0	0	0	0	0	0	0	0	0	0	0	0	0	0	0	0	0	0	0	0	0	0	0	0	0	0	0	0	0	0	0	0	0	0	0	0	0	0	0	0	0	0	0	0
10	Gunma	3	Non-metallic ores	0.016355	0	0.00497193	0	0	0	0	0	0	0	0.129852	0	0	0.0641125	0.0609275	0	0.00483469	0	0	0.002233	0.0033688	-0.00311127	0.459562	0	0.00865713	0.243488	2.71663	0.0643583	0.52135	0	0	0.00341111	0	0.0140995	0.00226819	0.00483512	0.00142955	0	0	0.00161349	0	0	0	0	0	0
10	Gunma	4	Coal mining, crude petroleum and natural gas	0	0	0	0	0	0	0	0	0	0	0	0	0	0	0	0	0	0	0	0	0	0	0	0	0	0	0	0	0	0	0	0	0	0	0	0	0	0	0	0	0	0	0	0	0	0
10	Gunma	5	Food and Tobacco	395.49	0	0	0	591.746	46.9077	-0.00939508	0.41706	0.0429628	0	3.67713	0.00869352	0	0.0345431	0.0224121	0	0.209114	0	0	0.624953	5.2867	0	0	0.0475125	0	0	0	0.0211285	0.181397	0	0	0	0	0	0	0	0	0	0	0	0	0	0	0	0	0
10	Gunma	6	Beverage	8.23205	0	0	0	12.1173	127.525	0	0	0	0	0	0	0	0	0	0	0	0	0	0	0.297454	0	0	0	0	0	0	0	0	0	0	0	0	0	0	0	0	0	0	0	0	0	0	0	0	0
10	Gunma	7	Textile products	11.4867	0	0	0	0.0988513	0.15775	51.4405	207.648	0.3572	2.51666	5.75337	0.0788502	1.00193	0.452554	0	0	0	0	0	0	0	0	0	1.12044	36.5308	0.035118	0	0	0.239935	0	0	0	0	0	0.523423	0.637592	0.263915	0.186923	21.0598	0	0	0	0	0	0.246655	0.0292768
10	Gunma	8	Wearing aparel and other textile products	23.3816	0	1.73896	0	9.38121	1.77955	0.133511	6.37709	0.893993	0.433303	1.64994	0.882437	0.509678	0.561009	0.0454988	0	0.0998876	0	0	0.599758	1.19019	0	1.52595	0.347239	0.939024	0.377296	0.790412	0.193018	0.897619	0	0.223088	0.23257	0.0485646	0.0919912	0.609209	1.77673	0.974671	1.21331	2.15464	0.27502	0	4.2518	0.753222	0.219321	0.0414059	0.786349
10	Gunma	9	Timber and wooden products	9.04319	0	0.159404	0	2.14968	0.332399	0	0.152195	53.4102	18.9576	71.7257	0.106505	0.0369089	0.0141063	0	0	0.0301395	0	0	0.0696029	0	0	0	0.279397	0.0693884	0.483833	0.0867252	0.750652	0.458349	0	0	0.165867	0	0	0.777697	2.84198	0.815436	0.0378722	0.100991	0.0301756	0	0.177361	0.0340909	0	0	0.0237269
10	Gunma	10	Furniture and fixtures	0.460918	0	0.621529	0	2.86913	0.753263	0	0.753554	0.296435	8.56424	0.862725	0.147652	0.554325	0.0733357	0.0713718	0	0.208919	0.0434845	0	0.964936	1.59404	0	0.0265966	1.43235	1.60327	0	0.375722	0.246709	0.385108	0	0.169671	0.110552	0	0.0481007	0.563581	0.514882	0.324316	0.546915	3.25957	0.0522922	0	0.963045	0.49231	0.11468	0.043301	0.904573
10	Gunma	11	Pulp, paper, paperboard, building paper	0.0422917	0	0	0	0.0881882	0.0218919	0.0168936	0.0101055	0.138412	0.127931	12.3192	4.66307	4.97488	0	-0.000671667	0	0	0.0208704	0	0.418172	0.048086	0	0	0.136694	0.187846	0.0967744	0	0.0215288	0.0020386	0	0	0	0.000716925	0	0.0117605	0.0101123	0.0078482	0.00123526	0.00123524	0.00442901	0	0.0497503	0.00222386	0.00129507	0.00122249	0.0133496
10	Gunma	12	Paper products	127.722	0	0	0	82.7516	38.4899	0.476625	2.41758	0.262354	2.0453	3.03554	0.147011	1.585	0.951932	0.126333	0	0.323574	0.0577278	0	16.1619	18.6493	0	0.0235388	3.26739	2.12842	3.994	0.0221684	2.2827	1.38463	0	0	0	0.382061	0	0.0433728	0.0594374	2.99332	0.13553	0.0968061	0.208261	0	2.66578	0.522852	0.101495	0.13413	0.327508
10	Gunma	13	Publishing, printing	0.143486	0	0.0266646	0	15.7395	1.13237	0.106857	0.665568	0.115558	0.213235	0.0822622	0.2031	16.0463	0.0389345	0.0447813	0	0.0189062	0.0125925	0	1.93157	0.651314	0	0.015404	0.102237	0.409151	0.328498	0.0580287	0.022732	0.0313656	0	0.0307091	0.0544244	0.00367683	0.0174116	0.255452	0.372757	0.47965	0.446629	0.776047	0.0832871	0.00319011	0.335255	0.210998	0.00332096	0.0438878	0.229208
10	Gunma	14	Chemical fertilizer	55.008	0	0	0	0	0.00693067	0	0	0	0	0	0	0	9.3984	0.424217	0	1.446	0.00680162	0	0.135837	0.266408	0	0	0	0.0313469	0	0	0	0.0225887	0	0	0	0	0	0	0	0	0	0	0	0	0	0	0.00717503	0	0
10	Gunma	15	Basic inorganic chemical products	2.02136	0	0.0133712	0	16.0071	2.03328	0.289646	0.798823	0	0.0394813	14.2026	0.139369	0.0123841	7.99421	9.43843	0	7.70592	0.543058	0	25.5586	14.3073	0	0.0463469	3.49205	20.2437	5.61509	0.189144	0.521105	0.265638	0	0.246389	0.0770586	0.0147502	0.894077	0.426996	2.87373	0.444046	0.559121	1.43591	0.182248	0	0.773634	0.114386	0.226484	0.012576	0.35825
10	Gunma	16	Basic organic chemical products	0	0	0	0	0	0	0	0	0	0	0	0	0	0	0	0	0	0	0	0	0	0	0	0	0	0	0	0	0	0	0	0	0	0	0	0	0	0	0	0	0	0	0	0	0	0
10	Gunma	17	Organic chemical products	0.00399746	0	0.00079858	0	0.690316	0.681729	0.0256021	0.00130709	0.0087016	0.0110039	0.391268	0.00384168	0.0251473	0.0305293	0.123799	0	4.9266	1.51306	0	1.82689	1.97941	0	0.0092267	1.24995	7.50376	0.0136879	0.00260686	0.000778059	0.458412	0	0	0	0	0	0.028052	0.00310642	0.00562548	0.000758928	0.00683026	0.00181409	0	0.0234576	0.00546524	0.00159135	0.00300434	0.0028528
10	Gunma	18	Synthetic resins	0	0	0	0	0	0	0.15684	0	0.00853827	0.229058	0.32304	0.0621979	0.287394	0	0	0	0	0	0	5.08547	0	0	0	77.5114	0.202612	0	0	0	0.252351	0	0	0	0	0	0.678961	0.025147	0.0693929	0	0	0.0685314	0	2.5319	0	0.163175	0.0648548	0.138563
10	Gunma	19	Synthetic fibers	0	0	0	0	0.236028	0	3.22546	1.36457	0	0.0125412	0.181368	0	0	0	0	0	0	0	0	0	0	0	0.0126189	0.0366914	0.0158475	0	0	0	0.346401	0	0	0	0	0	0	0	0	0	0	0	0	0	0	0	0	0
10	Gunma	20	Final chemical products	141.81	0	1.79381	0	8.26266	2.76227	1.20289	0.816987	15.1114	4.0991	6.51607	8.52931	33.5744	0.563188	0.322416	0	1.75187	0.471449	0	32.1531	8.84824	0.0683263	4.16311	5.98751	10.1713	0.367621	2.4441	0.0455925	2.82156	0	0.143714	0.389539	0.017207	0	0.863401	7.31152	5.66668	2.29769	10.8212	0.354338	0.0149293	3.3045	0.813971	0.994664	0.0293412	0.682602
10	Gunma	21	Medicaments	29.8628	0	0	0	2.63581	0	0	0.016766	0	0	0	0	0	0	0	0	0	0	0	0.687012	47.1845	0	0	0	0	0	0	0	0	0	0	0	0	0	0	0	0	0	0	0	0	0	0	0	0	0
10	Gunma	22	Petroleum refinery products	0.185042	0	0.00510183	0	0.0436474	0.01417	0.00155428	0.00217342	0.00786908	0.000504433	0.0568144	0.002727	0.00630025	0.00779271	0.0032503	0	0.00443997	0.00517078	0	0.00117183	0.00441966	0.0029593	0.039728	0.00379742	0.00695656	0.00506614	0.00615978	0.000612829	0.0118625	0	0.00330539	0.0018572	0.000950848	0.00277466	0.00178544	0.00545985	0.00300078	0.00376368	0.00502555	0.000635042	0	0.000870927	0.000159431	0.000835608	0	0.000145637
10	Gunma	23	Coal products	0	0	0.000930418	0	0	0	0	0	0	0	0	0	0	0.0158086	0.00192316	0	0.0654424	0	0	0	0	0	0	0	0	0	0	0	0.0442644	0	0.0690073	0.0303848	0.000513187	0.00340228	0.00198079	0.00271445	0	0.00044211	0.00132631	0	0	0	0	0	0	0
10	Gunma	24	Plastic products	150.614	0	0	0	190.418	112.847	1.01415	7.0471	7.24624	12.0546	8.94115	2.64768	118.623	3.77313	1.33923	0	1.04327	0.118444	0	42.7978	63.3637	0	0	636.253	226.758	4.43324	0.363876	0.203634	0.874141	0	0	0	0	0.262036	7.03031	11.4229	5.00583	4.48897	241.408	1.51931	0.120024	61.3561	3.5044	42.3154	1.76917	13.9994
10	Gunma	25	Rubber products	3.18482	0	0.514187	0	0.318053	0.0435051	0.0489594	0.610395	0.0839575	0.144595	0.0878051	0.0860766	0.486695	0.0840048	0.0116793	0	0.205125	0.0106737	0	0.171719	0.643189	0	0.0979263	0.351586	47.6331	0	0.0676317	0	0.277679	0	0.348799	0.15739	0.00623315	0	0.0721759	3.11563	0.284311	4.98322	16.4745	0.250296	0.0378563	2.55502	0.425367	0.686844	0.0797153	1.49371
10	Gunma	26	Glass and glass products	0.0641582	0	0	0	2.40751	11.4874	0	0.0327788	0	2.25492	0	0	0.00741924	0	0.0745103	0	0.00908774	0	0	1.19205	3.95896	0	0	2.08505	0.676482	1.39021	0.0522992	0	0.0670072	0	0	0	0	0	0.520148	0.646586	0.217657	0.0685158	0.0685149	0	0.00766702	0.0641741	0.0342639	0.015963	0.0226026	0.0214625
10	Gunma	27	Cement and cement products	0.019064	0	0	0	0	0	0	0	0	0	0	0	0	0	0	0	0	0	0	0	0	0	0.0146674	0	0	0	26.2387	0	0.0663684	0	0	0.0182901	0	0	0	0	0.0127753	0	0	0	0	0	0	0	0	0
10	Gunma	28	Pottery, china and earthenware	0	0	0	0	0.00668575	0.000290982	0	0	0	0.00654664	0	0	0	0	0.000312467	0	0	0	0	0	0	0	0	0.00105986	0	0	0.00164492	0.00972086	0	0	0	0	0	0	0	0	0.000912769	0.00114931	0.0011493	0	0	0.0336401	0	0.000602483	0	0.00594036
10	Gunma	29	Other ceramic, stone and clay products	2.32603	0	0	0	0.311049	0	0	0	0.0194628	0.0725184	0.633093	0	0.00454937	0.0208648	0.781783	0	0.0167174	0.0278366	0	0.0669178	0.246951	0	0.686707	0.10762	0.115462	0.715643	3.3138	0.349361	1.59729	0	0.0452562	0.556722	0	2.19647	0.763381	1.30885	0.672264	5.37765	2.04927	0.245482	0	0.629609	0.193293	0.479625	0.0138596	0.0745761
10	Gunma	30	Pig iron and crude steel	0	0	0	0	0	0	0	0	0	0	0	0	0	0	0	0	0	0	0	0	0	0	0	0	0	0	0	0	0	0	21.2489	0.557872	0.138269	0	0	-0.0978582	-0.175881	-0.124152	-0.389228	-0.00200516	0	-0.0298569	0	-0.00175897	-0.00166039	-0.00315329
10	Gunma	31	steel products	0.1098	0	0.0319885	0	0	0	0.00593942	0	0.00905346	0.443029	0	0	0	0	0	0	0	0	0	0	0	0	0	0.204249	1.11994	0	1.43705	0	0.0931743	0	12.49	1.01832	5.66366	0	0.0364829	25.2244	14.04	9.73459	13.7689	0.90314	0.00437378	3.74024	0.177872	0.571424	0.0580231	0.126518
10	Gunma	32	Cast and forged steel products	0.344856	0	0.0246044	0	0	0	0	0	0	0.145299	0	0	0	0	0	0	0	0	0	0	0	0	0	0	0	0	0.0535452	0.167805	0.102905	0	0	0.614448	0	0	0.47143	22.8507	3.59025	90.4444	59.9058	11.933	0.0235491	16.9733	1.57861	0.612874	0.0231411	0.0659216
10	Gunma	33	Other iron or steel products	0	0	0	0	0	0	0	0	0	8.60138	0	0	0	0	0	0	0	0	0	0.0625132	0	0	0	0.0784181	0	0	2.3692	0.0581199	0.779662	0	0	0.458374	0	0	0.857227	219.283	113.368	75.8241	46.5709	1.59224	0.0285471	10.3011	0	3.00152	0.701312	0.452839
10	Gunma	34	Non-ferrous metals	0	0	0	0	0	0	0.0208654	0	0	0.059253	0	0	-0.312243	0	2.72516	0	0.355143	0	0	5.94295	0	0	0	0.147728	-0.0209647	0.761014	0	0.410585	0.553935	0	0.110933	0.219732	-0.0132821	29.9393	84.8457	-1.06553	4.94361	-0.0343277	1.73924	0.0683786	0	2.29354	0.113301	21.8698	0.0113243	0.0537655
10	Gunma	35	Non-ferrous metal products	0	0	0	0	10.0295	4.57781	0.0366346	0	0.146586	2.01826	0	0.0169495	3.34807	0	0	0	0	0	0	0.376613	1.18314	0	0	1.94531	2.63184	0.0226467	0	0.0617903	0.795743	0	0	0	0	0.463819	14.0192	227.889	27.4647	62.4006	70.496	5.57061	0.0404665	40.8711	7.08911	37.703	0.815191	6.23035
10	Gunma	36	Metal products for construction and architecture	0.0586	0	0	0	0	0	0	0	0.00828308	0.115221	0	0	0	0	0	0	0	0	0	0	0	0	0	0	0	0	0.0909874	0	0	0	0	0	0	0	0.0178018	8.4164	0.319764	0.476801	0	0.0664831	0	0	0	0	0	0.00746787
10	Gunma	37	Other metal products	12.9697	0	11.445	0	50.3259	130.233	0.0784971	2.74319	6.10231	14.742	2.51194	0.338966	1.09077	0	1.96619	0	2.50086	0.399311	0	13.8925	20.2236	0	0.942038	3.20225	86.3372	1.35871	11.3692	1.55936	5.58875	0	0.0278226	1.53727	0	0.788752	3.5359	146.13	61.6293	98.3496	187.312	7.61445	0.404637	41.9595	9.55826	3.39995	0.994065	5.07023
10	Gunma	38	General industrial machinery	0.216572	0	0.793191	0	0	0	0	0	0	0.0887145	0	0	0	0	0	0	0	0	0	0	0	0	0.0208283	4.70798	0	0	0	0.122947	0.490076	0	0	0.190466	0.0397725	0.0565028	0.211081	0.578524	0.598663	367.121	133.765	1.63804	0.120777	5.68041	1.4342	0.0898077	0.271279	0.209296
10	Gunma	39	Special industrial machinery	0	0	0	0	0	0	0	0	0	0	0	0	0	0	0	0	0	0	0	0	0	0	0	0	0	0	0	0	0	0	0	0	0	0	0	0	0	1.99347	313.524	0	0	0	0	0.0733334	0	0
10	Gunma	40	Other general machines	0	0	1.38835	0	0	0	0	0	0.0896916	1.99029	0	0	0	0	0	0	0	0	0	0.0316289	0	0	0	0.581914	0	0	0	0.529309	0.662716	0	0	0.289896	0	0	0.771054	1.3795	0.971932	34.5344	92.6162	22.7625	0.0288871	10.7462	3.12413	0.601438	0.227093	0.808644
10	Gunma	41	Machinery for office and service industry	0	0	0	0	0	0	0	0	0	0	0	0	0	0	0	0	0	0	0	0	0	0	0	0	0	0	0	0	0	0	0	0	0	0	0	0	0	0	0	0	5.54152	0	0	0	0	0
10	Gunma	42	Industrial electric equipment	0.560243	0	0.0279802	0	0	0	0	0	0.0277165	0.0550783	0	0	0	0	0	0	0	0	0	0	0	0	0	0.0245214	0	0	0	0	0	0	0	0	0	0	0	6.42163	0.168945	136.571	121.173	0.476707	0.24102	296.878	9.95738	3.67996	0.86843	3.67334
10	Gunma	43	Applied electric equipment and electric mesuring instruments	0	0	0	0	0	0	0	0	0	0	0	0	0	0	0	0	0	0	0	0	0	0	0	0	0	0	0	0	0	0	0	0	0	0	0	0	0	0.611351	12.2628	0.0859604	0	11.9574	15.1821	0	0	0
10	Gunma	44	Other electric equipment	0.904479	0	0.0451723	0	0.045405	0	0	0	0	0.311222	0	0	0	0	0	0	0	0	0	0.473384	0	0	0	0.0395882	0	0	0	0	0	0	0	0	0	0	0.0480843	0	1.04555	14.0808	51.2141	0.359153	0.0432348	23.5625	6.33749	34.7913	0.5948	3.83257
10	Gunma	45	Household electric and electric applications	0	0	0	0	0	0	0	0	0	0	0	0	0	0	0	0	0	0	0	0	0	0	0	0	0	0	0	0	0	0	0	0	0	0	0	0	0	0	0	0	0	0	0	0	2.84148	0
10	Gunma	46	Communication equipment	0.0333148	0	0	0	0	0.0160133	0	0	0	0	0	0	0.0154101	0	0	0	0	0	0	0	0.220962	0	0	0	0.0289708	0	0	0	0	0	0	0	0	0	0.017711	0.0647223	0	0.173935	0.0790602	0	0	0.0148103	0.0284671	0	0	1.01045
10	Gunma	47	Electric computing equipment and accessory equipment	0	0	0	0	0	0	0	0	0	0	0	0	0	0	0	0	0	0	0	0	0	0	0	0	0	0	0	0	0	0	0	0	0	0	0	0	0	0	0.166211	0	0	0	0	0	0	0.00709995
10	Gunma	48	Semiconductor devices and integrated circuits	0	0	0	0	0	0	0	0	0	0	0	0	0	0	0	0	0	0	0	0	0	0	0	0	0	0	0	0	0	0	0	0	0	0	0	0	0.0824772	0.162268	2.92078	0.0465447	0.0588319	9.52034	12.6494	0.006805	0.417535	4.15994
10	Gunma	49	Other electrical equipment	0	0	0	0	0	0	0	0	0	0	0	0	0.52611	0	0	0	0	0	0	0	0.00585696	0	0	0	0	0	0	0	0	0	0	0	0	0	0.0197173	0.0060045	0.391452	1.05034	17.7617	0.035065	0.106372	12.5144	16.11	0.00615196	0.598139	8.06187
10	Gunma	50	Passenger motor cars	0	0	0	0	0	0	0	0	0	0	0	0	0	0	0	0	0	0	0	0	0	0	0	0	0	0	0	0	0	0	0	0	0	0	0	0	0	0	0	0	0	0	0	0	0	0
10	Gunma	51	Other cars	0	0	0	0	0	0	0	0	0	0	0	0	0	0	0	0	0	0	0	0	0	0	0	0	0	0	0	0	0	0	0	0	0	0	0	0	0	0	0	0	0	0	0	0	0	0
10	Gunma	52	Motor vheicle parts and accessories	0	0	0	0	0	0	0	0	0	0	0	0	0	0	0	0	0	0	0	0	0	0	0	0	0	0	0	0	0	0	0	0	0	0	0	0	0	0	0.030707	0	0	0	0	0	0	0
10	Gunma	53	Other transportation equipment	9.28751	0	0.0102621	0	0	0	0	0	0	0	0	0	0	0	0	0	0	0	0	0	0	0	0	0	0	0	0	0	0	0	0	0	0	0	0	0	0	0	0	0	0	0	0	0	0	0
10	Gunma	54	Precision instruments	0.36329	0	0	0	0.0107278	0	0	0	0	0	0.0780476	0.0171143	0	0	0	0	0	0	0	0.0111846	0.0303723	0	0	0.0561207	0.0185835	0	0	0.0103985	0.0111595	0	0	0	0	0	0	0.0311374	0	3.57029	13.926	0	0	1.22552	0.173473	0	0	0.133444
10	Gunma	55	Miscellaneous manufacturing products	3.90683	0	1.13764	0	0.904161	0.674764	0.011462	9.65667	0.550356	1.35406	0.18138	0.0954553	0.0735107	0.0140476	0	0	0	0	0	0.0138627	0	0	0.0764195	0.139117	0.0460664	0.382622	0.0143941	0.438207	0.0276631	0	0	0.266824	0	0	1.02792	0.347338	0.0399365	0.440004	1.20685	0.015025	0	0.117749	0.226327	0.0131803	0	0.0945125
10	Gunma	56	Reuse and recycling	0.413337	0	0	0	0.567509	1.21244	0.0122303	0	0	0	7.81568	0	0	1.56262	0.175054	0	0.0440356	0	0	0.00369797	0	0.0154572	0	5.52947	0.00921641	0.43851	0.648913	0.261294	0.0184483	0	0.686002	1.47777	0.358127	3.99646	0.93906	0	0.00355112	0	0	0	0	0	0	0	0	0
10	Gunma	57	Building construction and repair of construction	0	0	0	0	0	0	0	0	0	0	0	0	0	0	0	0	0	0	0	0	0	0	0	0	0	0	0	0	0	0	0	0	0	0	0	0	0	0	0	0	0	0	0	0	0	0
10	Gunma	58	Public construction	0	0	0	0	0	0	0	0	0	0	0	0	0	0	0	0	0	0	0	0	0	0	0	0	0	0	0	0	0	0	0	0	0	0	0	0	0	0	0	0	0	0	0	0	0	0
10	Gunma	59	Other civil enginnering and construction	0	0	0	0	0	0	0	0	0	0	0	0	0	0	0	0	0	0	0	0	0	0	0	0	0	0	0	0	0	0	0	0	0	0	0	0	0	0	0	0	0	0	0	0	0	0
10	Gunma	60	Electricity	0.0941243	0	0.0109048	0	0.105995	0.0183806	0.0112108	0.0100338	0.0202027	0.00240764	0.0671627	0.00484418	0.0248399	0.00801219	0.012001	0	0.0221007	0.00487147	0	0.00908036	0.0194861	0.0011619	0.00384788	0.0665873	0.0191157	0.00549369	0.00811359	0.000890165	0.0211091	0	0.038586	0.0172398	0.00247091	0.00169356	0.00762346	0.0336198	0.0231934	0.0215669	0.0533563	0.00632683	2.82082e-05	0.0160028	0.00289944	0.0168556	0.000249475	0.00128975
10	Gunma	61	Gas supply and heat supply	0	0	0	0	0	0	0	0	0	0	0	0	0	0	0	0	0	0	0	0	0	0	0	0	0	0	0	0	0	0	0	0	0	0	0	0	0	0	0	0	0	0	0	0	0	0
10	Gunma	62	Water supply and waste management services	0.00341526	0	0.000789295	0	0.00926483	0.00311582	0.000278199	0.000175172	0.000331295	6.5835e-05	0.00502598	0.000117986	0.00102839	0.000909209	0.000456257	0	0.00150249	0.00034116	0	0.00215898	0.00170047	0	9.274e-05	0.00127793	0.00115303	0.000171976	0.00251832	6.51706e-05	0.000839274	0	0.000530001	0.000231291	0.000147576	8.38615e-05	0.000412968	0.00182137	0.000673132	0.00104252	0.00419544	0.000805328	0	0.000976455	0.000102998	0.000653133	1.25822e-05	7.16856e-05
10	Gunma	63	Commerce	12.539	0	0.30281	0	19.0389	3.17312	0.426272	1.67709	0.965408	0.646999	3.40375	0.104051	4.28225	0.202666	0.146395	0	0.539828	0.0216308	0	1.70221	0.380576	0.0185773	0.439045	4.0996	0.734758	0.240795	1.00602	0.0437998	0.584458	0	0.339948	0.243597	0.551119	0.227751	0.678972	4.55658	1.28208	4.95102	10.4944	0.679205	0.0170484	3.68144	0.674092	1.22628	0.0654164	0.355278
10	Gunma	64	Financial and insurance	4.27692	0	0.766072	0	1.24641	0.704155	0.212093	0.714554	0.18545	0.134491	0.716982	0.0194099	0.991033	0.0868359	0.0494832	0	0.154408	0.00660556	0	0.528251	0.102573	0.0117826	0.0205117	0.279581	0.136761	0.11411	0.655624	0.0204418	0.172126	0	0.0902094	0.0480553	0.0676538	0.168618	0.106513	1.58886	0.240373	0.611467	1.61556	0.301242	0.00154469	0.636887	0.051544	0.205294	0.00657769	0.0663028
10	Gunma	65	Real estate agencies and rental services	0	0	0	0	0	0	0	0	0	0	0	0	0	0	0	0	0	0	0	0	0	0	0	0	0	0	0	0	0	0	0	0	0	0	0	0	0	0	0	0	0	0	0	0	0	0
10	Gunma	66	House rent	0	0	0	0	0	0	0	0	0	0	0	0	0	0	0	0	0	0	0	0	0	0	0	0	0	0	0	0	0	0	0	0	0	0	0	0	0	0	0	0	0	0	0	0	0	0
10	Gunma	67	Transport	15.3714	0.000559737	4.08602	0	5.20469	0.588098	0.154409	0.363353	0.493966	0.230205	1.62987	0.0357196	1.02545	0.140854	0.0774359	0	0.434769	0.00525984	0	0.472176	0.119578	0.0510047	0.391316	0.429035	0.110187	0.168126	2.74279	0.0108515	0.183682	0	0.150193	0.172137	0.0536132	0.132761	0.396627	2.25831	0.660778	1.35773	2.56338	0.275434	0.00290727	0.598442	0.050671	0.119547	0.0138083	0.141518
10	Gunma	68	Communication	0.0443403	0	0.00967492	0	0.0359816	0.00993222	0.00512299	0.0141641	0.00276864	0.00529023	0.0154275	0.000689519	0.0574479	0.00171235	0.0017776	0	0.00170735	0	0	0.0198271	0.0605716	0	0.00298088	0.0241179	0.0129152	0.00345483	0.0104105	0.000418947	0.00730607	0	0.00316939	0.00227157	0.000948686	0.00157238	0.0225425	0.146462	0.0189315	0.0564953	0.0680386	0.0106227	0	0.0529153	0.0101158	0.0100682	0.000606634	0.00691243
10	Gunma	69	Broadcasting	0	0	0	0	0	0	0	0	0	0	0	0	0	0	0	0	0	0	0	0	0	0	0	0	0	0	0	0	0	0	0	0	0	0	0	0	0	0	0	0	0	0	0	0	0	0
10	Gunma	70	Information services	0.279566	0	0.0033019	0	0.184911	0.127114	0.00653947	0.0200737	0.00981236	0.0222847	0.102189	0.00189098	0.114025	0.0155283	0.0034125	0	0.0219402	0.000891052	0	0.0716762	0.0733817	0	0.00544998	0.104174	0.0287464	0.0161702	0.0405481	0.00275748	0.0271265	0	0.0130379	0.00634298	0.011968	0.00936362	0.0336413	0.158259	0.0740515	0.223243	0.650444	0.0503621	0.000902936	0.323302	0.0887748	0.145226	0.000887292	0.0320165
10	Gunma	71	﻿Internet based services	0.000173708	0	8.67549e-05	0	0.00101735	0.000278319	5.0114e-05	0.00037866	5.72916e-05	0.000142312	0.000237906	0	0.00158022	3.07092e-05	2.98869e-05	0	3.28067e-05	0	0	0.000303049	0.000987536	0	3.34119e-05	0.000887022	0.000151058	6.19587e-05	0.000220266	0	9.07108e-05	0	2.66436e-05	5.55522e-05	0	3.02132e-05	0.00049252	0.00239042	0.000407421	0.000769508	0.00115425	0.00016423	0	0.00151871	0.000272124	0.000259318	0	0.000154959
10	Gunma	72	Image information production and distribution industry	0.0305816	0	0.0112788	0	0.0538502	0.00995047	0.0195456	0.0507671	0.00372417	0.0078632	0.0231972	0.00113038	0.0404788	0.0374291	0.00437121	0	0.00533139	0	0	0.0389062	0.0258557	0	0.00380082	0.0383026	0.0380498	0.00855855	0.0429544	0.00183149	0.0314482	0	0.00389686	0.0036111	0.00259208	0.00490993	0.00650318	0.0959738	0.0430364	0.0415352	0.0705642	0.014412	0	0.127167	0.0116587	0.0299674	0.000883999	0.0188867
10	Gunma	73	Public administration	0	0	0	0	0	0	0	0	0	0	0	0	0	0	0	0	0	0	0	0	0	0	0	0	0	0	0	0	0	0	0	0	0	0	0	0	0	0	0	0	0	0	0	0	0	0
10	Gunma	74	Education and Research	0.206982	0	0.0192557	0	1.63905	0.735439	0.0570788	0.13768	0.0150586	0.0937633	1.0283	0.00812563	0.0901094	0.405736	0.235665	0	0.777216	0.0660483	0	5.46533	3.04461	0.00887862	0.0550341	2.55439	0.757027	0.648156	0.702461	0.0592449	1.38711	0	0.195152	0.168403	0.00111798	0.144002	0.751916	2.07265	0.245791	3.00306	18.9928	0.0805773	0.0223097	8.42114	1.29699	2.22352	0.100084	0.661632
10	Gunma	75	Medical service, health and social security and nursing care	0.0405462	0	0.0110683	0	0.0849569	0.0430942	0.00261557	0.0146165	0.00323937	0.00272346	0.0259835	0.000403376	0.0265599	0.00320558	0.00259978	0	0.00684903	0.000237594	0	0.0387513	0.0190896	0.00110189	0.00261577	0.0231479	0.0100741	0.00323377	0.0175181	0.000490176	0.00578651	0	0.00417178	0.00217455	0.00332995	0.000788449	0.00348099	0.0535741	0.0177202	0.0239062	0.132678	0.0300004	0.000240763	0.0268696	0.00301271	0.00375957	0.000236591	0.00516713
10	Gunma	76	Advertising and survery	0.0348753	0	0.028583	0	1.30004	1.25382	0.0170269	0.0709065	0.0106176	0.0575835	0.198814	0.00859389	0.0773504	0.0218163	0.0124623	0	0.0126665	0.000843654	0	3.42921	0.333835	0	0.00154802	0.224272	0.0521016	0.0110041	0.0393632	0.00522159	0.036424	0	0.0148133	0.00772145	0.00591203	0.0163312	0.0232946	0.310104	0.0417978	0.219432	0.409997	0.0329724	0.00128236	0.28901	0.0515777	0.0529533	0.00588066	0.0454701
10	Gunma	77	Giids rental and leasing services	0.658416	0	0.0940852	0	0.756558	0.199032	0.0556936	0.100631	0.0424469	0.0467595	0.184778	0.00522817	0.418442	0.00989228	0.0115528	0	0.0380445	0.00175969	0	0.144478	0.027393	0	0.101171	0.457174	0.174364	0.042911	0.366932	0.00907599	0.391554	0	0.0334723	0.0241581	0.0277454	0.0145987	0.0852765	0.576155	0.333728	0.669274	2.00602	0.356565	0.00178316	1.32172	0.0645484	0.142935	0.00700907	0.108153
10	Gunma	78	Other business services	0	0	0	0	0	0	0	0	0	0	0	0	0	0	0	0	0	0	0	0	0	0	0	0	0	0	0	0	0	0	0	0	0	0	0	0	0	0	0	0	0	0	0	0	0	0
10	Gunma	79	Personal services	0.154884	0	0.00276264	0	0.0527604	0.0106354	0	0.00565224	0.0013683	0	0.0151519	0	0.0217488	0	0	0	0.00156705	0	0	0.0101329	0.0026206	0	0	0.0145268	0.00360773	0	0.00450913	0	0.00144431	0	0	0	0	0.00288634	0.00294073	0.0228363	0.00556028	0.0170655	0.0262543	0.00313786	0	0.0319682	0.00236333	0.00825778	0	0.00123364
10	Gunma	80	Activities not elsewhere classified	0	0	0	0	0	0	0	0	0	0	0	0	0	0	0	0	0	0	0	0	0	0	0	0	0	0	0	0	0	0	0	0	0	0	0	0	0	0	0	0	0	0	0	0	0	0
11	Saitama	1	Agriculture, forestry and fishery	46.6893	0	0.000850479	0	96.1563	2.13799	0.344878	0.00278407	10.3505	0	0.104951	0	0	0.00451575	0.00615275	0	0.011578	0	0	0.0133689	0.114559	0	0.010809	0	1.33795	0	0	0	0.00088926	0	0	0	0	0	0	0	0	0	0	0	0	0	0	0	0	0
11	Saitama	2	Metallic ores	0	0	0	0	0	0	0	0	0	0	0	0	0	0	0	0	0	0	0	0	0	0	0	0	0	0	0	0	0	0	0	0	0	0	0	0	0	0	0	0	0	0	0	0	0	0
11	Saitama	3	Non-metallic ores	0.0145864	0	0.00443427	0	0	0	0	0	0	0	0.11581	0	0	0.0571793	0.0543388	0	0.00431186	0	0	0.00199153	0.00300449	-0.00277481	0.409864	0	0.00772094	0.217157	2.42285	0.0573985	0.464971	0	0	0.00304223	0	0.0125748	0.00202291	0.00431225	0.00127496	0	0	0.00143901	0	0	0	0	0	0
11	Saitama	4	Coal mining, crude petroleum and natural gas	0	0	0	0	1.21817e-07	0	0	0	0	0	8.5302e-05	0	0	5.46969e-05	1.25252e-07	0	1.05866e-05	3.43404e-07	0	2.54009e-07	1.14962e-07	0.000287731	0	0	0	5.45289e-06	1.31873e-06	2.00734e-06	8.36347e-06	0	1.04961e-05	0	0	3.79859e-07	0	2.35716e-07	0	0	5.75869e-07	0	0	4.31508e-07	0	0	0	0
11	Saitama	5	Food and Tobacco	809.172	0	0	0	1210.71	95.9731	-0.0192223	0.853305	0.0879018	0	7.52341	0.0177869	0	0.0706753	0.0458551	0	0.427847	0	0	1.27865	10.8166	0	0	0.0972106	0	0	0	0.0432289	0.371138	0	0	0	0	0	0	0	0	0	0	0	0	0	0	0	0	0
11	Saitama	6	Beverage	1.31852	0	0	0	1.94083	20.4256	0	0	0	0	0	0	0	0	0	0	0	0	0	0	0.0476431	0	0	0	0	0	0	0	0	0	0	0	0	0	0	0	0	0	0	0	0	0	0	0	0	0
11	Saitama	7	Textile products	8.86213	0	0	0	0.0762652	0.121707	39.687	160.203	0.275584	1.94164	4.43881	0.060834	0.773003	0.349151	0	0	0	0	0	0	0	0	0	0.864435	28.184	0.027094	0	0	0.185113	0	0	0	0	0	0.403828	0.491911	0.203614	0.144214	16.2479	0	0	0	0	0	0.190298	0.0225875
11	Saitama	8	Wearing aparel and other textile products	19.5291	0	1.45244	0	7.83553	1.48635	0.111513	5.32637	0.746695	0.36191	1.37809	0.737043	0.425701	0.468575	0.0380023	0	0.0834298	0	0	0.50094	0.994086	0	1.27453	0.290027	0.784307	0.315131	0.660181	0.161216	0.749724	0	0.186331	0.194251	0.0405629	0.0768344	0.508834	1.48399	0.81408	1.0134	1.79964	0.229707	0	3.55126	0.629118	0.183185	0.0345837	0.656788
11	Saitama	9	Timber and wooden products	11.78	0	0.207646	0	2.80026	0.432998	0	0.198256	69.5744	24.695	93.433	0.138737	0.0480792	0.0183755	0	0	0.039261	0	0	0.0906678	0	0	0	0.363955	0.0903883	0.630262	0.112972	0.977832	0.597065	0	0	0.216065	0	0	1.01306	3.70209	1.06222	0.0493339	0.131555	0.0393081	0	0.231039	0.0444083	0	0	0.0309076
11	Saitama	10	Furniture and fixtures	0.714389	0	0.963324	0	4.44694	1.1675	0	1.16795	0.459452	13.2739	1.33716	0.228849	0.859163	0.113665	0.110621	0	0.323808	0.0673978	0	1.49558	2.47064	0	0.0412227	2.22004	2.48495	0	0.582341	0.38238	0.596889	0	0.262978	0.171347	0	0.0745525	0.873509	0.798029	0.502666	0.847678	5.05209	0.0810491	0	1.49265	0.763044	0.177745	0.0671134	1.40202
11	Saitama	11	Pulp, paper, paperboard, building paper	0.866521	0	0	0	1.8069	0.448546	0.346136	0.207052	2.83593	2.62119	252.41	95.5422	101.931	0	-0.0137619	0	0	0.427617	0	8.56799	0.98524	0	0	2.80075	3.84881	1.98282	0	0.441105	0.0417692	0	0	0	0.0146892	0	0.240963	0.207191	0.160803	0.0253094	0.025309	0.0907466	0	1.01934	0.0455649	0.0265349	0.0250478	0.273521
11	Saitama	12	Paper products	375.429	0	0	0	243.242	113.138	1.401	7.1063	0.77117	6.01199	8.92272	0.432128	4.65899	2.79813	0.371345	0	0.951122	0.169686	0	47.5067	54.8181	0	0.0691906	9.60425	6.25631	11.74	0.0651622	6.70981	4.07003	0	0	0	1.12304	0	0.127491	0.174712	8.79862	0.398381	0.284554	0.612168	0	7.83587	1.53688	0.298337	0.394264	0.962686
11	Saitama	13	Publishing, printing	1.46909	0	0.273006	0	161.149	11.5938	1.09406	6.81443	1.18315	2.18321	0.842243	2.07945	164.291	0.398632	0.458494	0	0.193572	0.128929	0	19.7765	6.66849	0	0.157714	1.04675	4.1891	3.36334	0.594128	0.232742	0.321137	0	0.314415	0.557225	0.0376453	0.178269	2.61545	3.81648	4.91091	4.57282	7.94557	0.852737	0.0326621	3.43251	2.16031	0.0340017	0.449346	2.34675
11	Saitama	14	Chemical fertilizer	45.6273	0	0	0	0	0.00574876	0	0	0	0	0	0	0	7.79566	0.351874	0	1.19941	0.00564172	0	0.112672	0.220977	0	0	0	0.0260012	0	0	0	0.0187366	0	0	0	0	0	0	0	0	0	0	0	0	0	0	0.00595145	0	0
11	Saitama	15	Basic inorganic chemical products	0.651543	0	0.00430993	0	5.15957	0.655386	0.0933612	0.257484	0	0.012726	4.57791	0.0449226	0.00399176	2.57677	3.04228	0	2.48384	0.175043	0	8.23827	4.61166	0	0.0149389	1.12559	6.52512	1.80991	0.0609665	0.167967	0.0856228	0	0.0794184	0.0248382	0.00475443	0.288187	0.137633	0.926286	0.143129	0.180221	0.462834	0.0587437	0	0.249365	0.0368698	0.0730025	0.0040536	0.115474
11	Saitama	16	Basic organic chemical products	0	0	0	0	0	0	0	0	0	0	0	0	0	0	0	0	0	0	0	0	0	0	0	0	0	0	0	0	0	0	0	0	0	0	0	0	0	0	0	0	0	0	0	0	0	0
11	Saitama	17	Organic chemical products	0.023161	0	0.00462691	0	3.99964	3.94989	0.148337	0.00757318	0.0504164	0.0637557	2.26698	0.0222584	0.145701	0.176885	0.717283	0	28.5443	8.76655	0	10.5849	11.4685	0	0.0534588	7.24213	43.4762	0.0793069	0.0151039	0.00450801	2.656	0	0	0	0	0	0.162531	0.0179984	0.0325936	0.00439717	0.039574	0.0105107	0	0.135911	0.0316652	0.00922018	0.0174069	0.0165289
11	Saitama	18	Synthetic resins	0	0	0	0	0	0	0.0281626	0	0.00153315	0.0411302	0.0580059	0.0111684	0.0516052	0	0	0	0	0	0	0.913159	0	0	0	13.9181	0.0363814	0	0	0	0.0453127	0	0	0	0	0	0.121916	0.00451545	0.0124603	0	0	0.0123056	0	0.454634	0	0.0293001	0.0116455	0.0248807
11	Saitama	19	Synthetic fibers	0	0	0	0	0	0	0	0	0	0	0	0	0	0	0	0	0	0	0	0	0	0	0	0	0	0	0	0	0	0	0	0	0	0	0	0	0	0	0	0	0	0	0	0	0	0
11	Saitama	20	Final chemical products	595.918	0	7.53797	0	34.7215	11.6077	5.05479	3.43316	63.5014	17.2253	27.3819	35.842	141.087	2.36664	1.35486	0	7.36176	1.98113	0	135.114	37.1822	0.287122	17.4943	25.1608	42.7422	1.54482	10.2706	0.19159	11.8568	0	0.603918	1.63693	0.0723077	0	3.6282	30.7246	23.8126	9.65541	45.4732	1.489	0.0627361	13.8862	3.42048	4.17979	0.123298	2.86844
11	Saitama	21	Medicaments	109.509	0	0	0	9.66567	0	0	0.0614819	0	0	0	0	0	0	0	0	0	0	0	2.51931	173.028	0	0	0	0	0	0	0	0	0	0	0	0	0	0	0	0	0	0	0	0	0	0	0	0	0
11	Saitama	22	Petroleum refinery products	4.2651	0	0.117594	0	1.00605	0.326609	0.0358252	0.050096	0.181378	0.0116269	1.30954	0.0628558	0.145217	0.179617	0.0749174	0	0.102339	0.119183	0	0.0270099	0.101871	0.0682102	0.915706	0.0875282	0.160344	0.116772	0.141979	0.0141253	0.273423	0	0.0761874	0.0428073	0.0219165	0.0639543	0.0411533	0.125846	0.0691663	0.0867506	0.115836	0.0146373	0	0.0200744	0.00367479	0.0192603	0	0.00335686
11	Saitama	23	Coal products	0	0	0.0160052	0	0	0	0	0	0	0	0	0	0	0.271942	0.0330825	0	1.12575	0	0	0	0	0	0	0	0	0	0	0	0.761442	0	1.18707	0.522682	0.00882791	0.0585264	0.0340738	0.0466943	0	0.00760523	0.0228154	0	0	0	0	0	0	0
11	Saitama	24	Plastic products	199.952	0	0	0	252.795	149.813	1.34636	9.35559	9.61996	16.0035	11.8701	3.515	157.482	5.00913	1.77794	0	1.38503	0.157244	0	56.8176	84.1205	0	0	844.677	301.04	5.88549	0.483075	0.270341	1.16049	0	0	0	0	0.347874	9.33331	15.1648	6.64565	5.95948	320.489	2.017	0.159342	81.4552	4.65237	56.1771	2.34871	18.5854
11	Saitama	25	Rubber products	3.64821	0	0.589002	0	0.36433	0.0498351	0.0560831	0.699208	0.0961734	0.165634	0.100581	0.0986009	0.55751	0.0962277	0.0133787	0	0.234972	0.0122268	0	0.196705	0.736775	0	0.112175	0.402743	54.5638	0	0.0774722	0	0.318082	0	0.39955	0.18029	0.00714008	0	0.0826776	3.56895	0.325678	5.70829	18.8715	0.286715	0.0433645	2.92678	0.487258	0.786781	0.091314	1.71104
11	Saitama	26	Glass and glass products	0.0846385	0	0	0	3.17603	15.1544	0	0.0432423	0	2.97473	0	0	0.00978759	0	0.0982952	0	0.0119887	0	0	1.57257	5.22273	0	0	2.75063	0.892426	1.83399	0.0689939	0	0.0883969	0	0	0	0	0	0.686188	0.852987	0.287137	0.0903872	0.0903859	0	0.0101145	0.0846595	0.0452015	0.0210586	0.0298177	0.0283137
11	Saitama	27	Cement and cement products	0.0448072	0	0	0	0	0	0	0	0	0	0	0	0	0	0	0	0	0	0	0	0	0	0.0344738	0	0	0	61.6705	0	0.15599	0	0	0.0429884	0	0	0	0	0.0300264	0	0	0	0	0	0	0	0	0
11	Saitama	28	Pottery, china and earthenware	0	0	0	0	0.00407506	0.000177358	0	0	0	0.00399028	0	0	0	0	0.000190453	0	0	0	0	0	0	0	0	0.000646003	0	0	0.0010026	0.005925	0	0	0	0	0	0	0	0	0.000556346	0.000700524	0.000700514	0	0	0.0205041	0	0.000367222	0	0.00362074
11	Saitama	29	Other ceramic, stone and clay products	10.114	0	0	0	1.3525	0	0	0	0.0846281	0.315324	2.75281	0	0.0197815	0.0907242	3.39934	0	0.0726905	0.121039	0	0.290972	1.07379	0	2.98593	0.467951	0.502052	3.11175	14.4091	1.51909	6.94532	0	0.196783	2.42074	0	9.55068	3.31933	5.69114	2.92313	23.3831	8.91061	1.0674	0	2.73766	0.840476	2.0855	0.060264	0.324272
11	Saitama	30	Pig iron and crude steel	0	0	0	0	0	0	0	0	0	0	0	0	0	0	0	0	0	0	0	0	0	0	0	0	0	0	0	0	0	0	0	0	0	0	0	0	0	0	0	0	0	0	0	0	0	0
11	Saitama	31	steel products	0.443483	0	0.129202	0	0	0	0.0239893	0	0.0365669	1.78939	0	0	0	0	0	0	0	0	0	0	0	0	0	0.824962	4.52342	0	5.80424	0	0.376331	0	50.447	4.11298	22.8755	0	0.147354	101.881	56.7074	39.318	55.6127	3.64778	0.0176657	15.1068	0.718426	2.30798	0.234355	0.511005
11	Saitama	32	Cast and forged steel products	0.571138	0	0.040749	0	0	0	0	0	0	0.24064	0	0	0	0	0	0	0	0	0	0	0	0	0	0	0	0	0.0886797	0.277913	0.170428	0	0	1.01763	0	0	0.780765	37.8445	5.94604	149.791	99.2138	19.7631	0.0390012	28.1106	2.61444	1.01502	0.0383255	0.109177
11	Saitama	33	Other iron or steel products	0	0	0	0	0	0	0	0	0	11.7503	0	0	0	0	0	0	0	0	0	0.0853992	0	0	0	0.107127	0	0	3.23656	0.0793975	1.06509	0	0	0.626184	0	0	1.17106	299.562	154.872	103.583	63.6205	2.17515	0.0389981	14.0723	0	4.10037	0.958061	0.618622
11	Saitama	34	Non-ferrous metals	0	0	0	0	0	0	0.0130532	0	0	0.037068	0	0	-0.195335	0	1.70483	0	0.222174	0	0	3.71784	0	0	0	0.0924169	-0.0131153	0.476082	0	0.256857	0.346535	0	0.0693986	0.137462	-0.00830916	18.7297	53.0785	-0.666581	3.09266	-0.021475	1.08805	0.0427769	0	1.43481	0.0708799	13.6815	0.00708435	0.0336351
11	Saitama	35	Non-ferrous metal products	0	0	0	0	29.4834	13.4573	0.107694	0	0.430915	5.93303	0	0.0498261	9.84226	0	0	0	0	0	0	1.10712	3.47804	0	0	5.71858	7.73677	0.066574	0	0.181644	2.33923	0	0	0	0	1.36348	41.2121	669.92	80.7373	183.438	207.236	16.3758	0.118959	120.148	20.8397	110.835	2.3964	18.3152
11	Saitama	36	Metal products for construction and architecture	0.0971852	0	0	0	0	0	0	0	0.0137371	0.191088	0	0	0	0	0	0	0	0	0	0	0	0	0	0	0	0	0.150898	0	0	0	0	0	0	0	0.0295235	13.9582	0.530314	0.790751	0	0.110259	0	0	0	0	0	0.0123851
11	Saitama	37	Other metal products	19.3026	0	17.0334	0	74.8992	193.823	0.116826	4.08264	9.08196	21.9403	3.73847	0.504477	1.62338	0	2.92624	0	3.72198	0.594287	0	20.676	30.0984	0	1.40202	4.76585	128.494	2.02214	16.9206	2.32077	8.31764	0	0.0414078	2.2879	0	1.17388	5.26242	217.482	91.7218	146.372	278.773	11.3325	0.602213	62.4476	14.2254	5.06009	1.47945	7.54593
11	Saitama	38	General industrial machinery	0.329613	0	1.2072	0	0	0	0	0	0	0.13502	0	0	0	0	0	0	0	0	0	0	0	0	0.0316997	7.16534	0	0	0	0.18712	0.745874	0	0	0.28988	0.060532	0.0859948	0.321256	0.880488	0.911138	558.742	203.584	2.49302	0.183817	8.64533	2.18278	0.136683	0.412874	0.31854
11	Saitama	39	Special industrial machinery	0	0	0	0	0	0	0	0	0	0	0	0	0	0	0	0	0	0	0	0	0	0	0	0	0	0	0	0	0	0	0	0	0	0	0	0	0	4.20498	661.338	0	0	0	0	0.154687	0	0
11	Saitama	40	Other general machines	0	0	1.51518	0	0	0	0	0	0.097885	2.17211	0	0	0	0	0	0	0	0	0	0.0345181	0	0	0	0.635072	0	0	0	0.577661	0.723255	0	0	0.316377	0	0	0.84149	1.50552	1.06072	37.6891	101.077	24.8419	0.0315259	11.7278	3.40952	0.656379	0.247837	0.882513
11	Saitama	41	Machinery for office and service industry	0	0	0	0	0	0	0	0	0	0	0	0	0	0	0	0	0	0	0	0	0	0	0	0	0	0	0	0	0	0	0	0	0	0	0	0	0	0	0	0	2.11314	0	0	0	0	0
11	Saitama	42	Industrial electric equipment	0.313006	0	0.0156324	0	0	0	0	0	0.0154851	0.030772	0	0	0	0	0	0	0	0	0	0	0	0	0	0.0137	0	0	0	0	0	0	0	0	0	0	0	3.58773	0.0943888	76.3015	67.6988	0.266334	0.134657	165.864	5.56314	2.05598	0.485188	2.05228
11	Saitama	43	Applied electric equipment and electric mesuring instruments	0	0	0	0	0	0	0	0	0	0	0	0	0	0	0	0	0	0	0	0	0	0	0	0	0	0	0	0	0	0	0	0	0	0	0	0	0	0.530688	10.6448	0.0746186	0	10.3798	13.179	0	0	0
11	Saitama	44	Other electric equipment	0.271445	0	0.0135567	0	0.0136266	0	0	0	0	0.0934013	0	0	0	0	0	0	0	0	0	0.142068	0	0	0	0.0118809	0	0	0	0	0	0	0	0	0	0	0.0144307	0	0.313781	4.22582	15.3699	0.107786	0.0129753	7.07138	1.90195	10.4413	0.178506	1.1502
11	Saitama	45	Household electric and electric applications	0	0	0	0	0	0	0	0	0	0	0	0	0	0	0	0	0	0	0	0	0	0	0	0	0	0	0	0	0	0	0	0	0	0	0	0	0	0	0	0	0	0	0	0	2.28191	0
11	Saitama	46	Communication equipment	0.176533	0	0	0	0	0.0848533	0	0	0	0	0	0	0.0816568	0	0	0	0	0	0	0	1.17086	0	0	0	0.153514	0	0	0	0	0	0	0	0	0	0.093849	0.342958	0	0.921666	0.418933	0	0	0.0784783	0.150844	0	0	5.35428
11	Saitama	47	Electric computing equipment and accessory equipment	0	0	0	0	0	0	0	0	0	0	0	0	0	0	0	0	0	0	0	0	0	0	0	0	0	0	0	0	0	0	0	0	0	0	0	0	0	0	0.060911	0	0	0	0	0	0	0.0026019
11	Saitama	48	Semiconductor devices and integrated circuits	0	0	0	0	0	0	0	0	0	0	0	0	0	0	0	0	0	0	0	0	0	0	0	0	0	0	0	0	0	0	0	0	0	0	0	0	0.0351457	0.0691464	1.24462	0.0198339	0.0250698	4.05686	5.39022	0.00289979	0.177923	1.77266
11	Saitama	49	Other electrical equipment	0	0	0	0	0	0	0	0	0	0	0	0	2.64861	0	0	0	0	0	0	0	0.0294859	0	0	0	0	0	0	0	0	0	0	0	0	0	0.0992632	0.0302286	1.9707	5.28775	89.4179	0.176529	0.535512	63.0014	81.103	0.0309709	3.01123	40.586
11	Saitama	50	Passenger motor cars	0	0	0	0	0	0	0	0	0	0	0	0	0	0	0	0	0	0	0	0	0	0	0	0	0	0	0	0	0	0	0	0	0	0	0	0	0	0	0	0	0	0	0	0	0	0
11	Saitama	51	Other cars	0	0	0	0	0	0	0	0	0	0	0	0	0	0	0	0	0	0	0	0	0	0	0	0	0	0	0	0	0	0	0	0	0	0	0	0	0	0	0	0	0	0	0	0	0	0
11	Saitama	52	Motor vheicle parts and accessories	0	0	0	0	0	0	0	0	0	0	0	0	0	0	0	0	0	0	0	0	0	0	0	0	0	0	0	0	0	0	0	0	0	0	0	0	0	0	0.0477798	0	0	0	0	0	0	0
11	Saitama	53	Other transportation equipment	4.53663	0	0.00501267	0	0	0	0	0	0	0	0	0	0	0	0	0	0	0	0	0	0	0	0	0	0	0	0	0	0	0	0	0	0	0	0	0	0	0	0	0	0	0	0	0	0	0
11	Saitama	54	Precision instruments	1.24594	0	0	0	0.0367921	0	0	0	0	0	0.267673	0.0586955	0	0	0	0	0	0	0	0.0383587	0.104165	0	0	0.192472	0.0637341	0	0	0.0356629	0.0382726	0	0	0	0	0	0	0.106789	0	12.2447	47.7606	0	0	4.20304	0.594946	0	0	0.457662
11	Saitama	55	Miscellaneous manufacturing products	8.04888	0	2.34378	0	1.86276	1.39016	0.0236142	19.8948	1.13385	2.78965	0.37368	0.196658	0.151448	0.028941	0	0	0	0	0	0.02856	0	0	0.15744	0.286611	0.0949065	0.788281	0.0296548	0.902798	0.0569919	0	0	0.549713	0	0	2.11773	0.715589	0.0822777	0.9065	2.48637	0.0309547	0	0.242588	0.466282	0.0271541	0	0.194716
11	Saitama	56	Reuse and recycling	0.592146	0	0	0	0.813014	1.73694	0.0175212	0	0	0	11.1967	0	0	2.23862	0.250782	0	0.0630855	0	0	0.00529771	0	0.022144	0	7.92151	0.0132034	0.62821	0.929632	0.37433	0.0264291	0	0.982767	2.11706	0.513053	5.72533	1.3453	0	0.00508733	0	0	0	0	0	0	0	0	0
11	Saitama	57	Building construction and repair of construction	0	0	0	0	0	0	0	0	0	0	0	0	0	0	0	0	0	0	0	0	0	0	0	0	0	0	0	0	0	0	0	0	0	0	0	0	0	0	0	0	0	0	0	0	0	0
11	Saitama	58	Public construction	0	0	0	0	0	0	0	0	0	0	0	0	0	0	0	0	0	0	0	0	0	0	0	0	0	0	0	0	0	0	0	0	0	0	0	0	0	0	0	0	0	0	0	0	0	0
11	Saitama	59	Other civil enginnering and construction	0	0	0	0	0	0	0	0	0	0	0	0	0	0	0	0	0	0	0	0	0	0	0	0	0	0	0	0	0	0	0	0	0	0	0	0	0	0	0	0	0	0	0	0	0	0
11	Saitama	60	Electricity	0.554444	0	0.0642352	0	0.624371	0.108272	0.0660377	0.0591046	0.119005	0.0141824	0.395626	0.0285349	0.146321	0.0471963	0.0706928	0	0.130185	0.0286957	0	0.0534884	0.114784	0.00684422	0.0226662	0.392236	0.112602	0.0323609	0.0477935	0.00524357	0.124345	0	0.227293	0.101552	0.014555	0.00997603	0.0449064	0.198039	0.136622	0.127041	0.314299	0.0372686	0.000166162	0.0942654	0.0170793	0.0992891	0.00146955	0.00759733
11	Saitama	61	Gas supply and heat supply	0.00429237	0	0.00142916	0	1.26126	0.292974	0.0160983	0.00935679	0.00707845	0.00421989	1.04641	0.0171879	0.0105892	0.0895423	0.0147702	0	0.0372904	0.27672	0	0.0224653	0.269781	0	0.00660493	0.222943	0.17668	0.171474	0.015551	0.0139243	0.0313808	0	0.260715	0.0741263	0.0031531	0.0029863	0.0471599	0.177898	0.122248	0.105939	0.12631	0.0178559	0	0.0915932	0.00978072	0.0854377	0	0.00127636
11	Saitama	62	Water supply and waste management services	0.40533	0	0.0936753	0	1.09957	0.369793	0.0330172	0.0207898	0.0393189	0.00781344	0.596494	0.0140029	0.122052	0.107907	0.0541495	0	0.178319	0.0404896	0	0.256233	0.201816	0	0.0110066	0.151668	0.136844	0.0204105	0.29888	0.00773458	0.0996069	0	0.0629017	0.0274501	0.0175146	0.00995287	0.049012	0.216164	0.0798888	0.123728	0.497924	0.0955781	0	0.115888	0.0122241	0.0775153	0.00149329	0.00850781
11	Saitama	63	Commerce	52.3894	0	1.26518	0	79.547	13.2577	1.78102	7.0071	4.0336	2.70325	14.2213	0.434738	17.8918	0.846766	0.611658	0	2.25547	0.0903764	0	7.11204	1.5901	0.0776183	1.83439	17.1287	3.06991	1.00607	4.20328	0.183001	2.44194	0	1.42035	1.01778	2.30265	0.951571	2.83683	19.038	5.3567	20.686	43.8468	2.83781	0.0712302	15.3815	2.81644	5.12354	0.273318	1.4844
11	Saitama	64	Financial and insurance	14.9014	0	2.66911	0	4.34269	2.45338	0.738966	2.48961	0.646136	0.468587	2.49807	0.0676271	3.45291	0.30255	0.172407	0	0.537981	0.0230148	0	1.84051	0.35738	0.0410522	0.0714659	0.974103	0.476495	0.397577	2.28429	0.0712222	0.599713	0	0.314303	0.167432	0.235716	0.587492	0.371108	5.53584	0.837496	2.13044	5.62885	1.04957	0.00538194	2.21901	0.179587	0.715276	0.0229177	0.231009
11	Saitama	65	Real estate agencies and rental services	0.212567	0	0.246889	0	0.866081	0.294641	0.0684555	0.224276	0.0464669	0.131219	0.365602	0.0158359	1.03813	0.0340833	0.0280674	0	0.0868267	0.00699568	0	0.225093	0.177989	0	0.048493	0.577706	0.141862	0.0317383	0.370731	0.00962179	0.123911	0	0.0636914	0.06877	0.0299587	0.0515889	0.110378	1.23169	0.250938	0.591269	1.33737	0.249575	0	0.709832	0.0760336	0.30749	0.00696616	0.0374839
11	Saitama	66	House rent	0	0	0	0	0	0	0	0	0	0	0	0	0	0	0	0	0	0	0	0	0	0	0	0	0	0	0	0	0	0	0	0	0	0	0	0	0	0	0	0	0	0	0	0	0	0
11	Saitama	67	Transport	148.873	0.0054211	39.5734	0	50.4078	5.69578	1.49546	3.51911	4.78411	2.22955	15.7854	0.345948	9.93159	1.36419	0.749974	0	4.21077	0.050942	0	4.57306	1.15812	0.493985	3.78993	4.15524	1.06717	1.62831	26.5642	0.105098	1.77898	0	1.45463	1.66716	0.519249	1.2858	3.84136	21.8719	6.3997	13.1497	24.8266	2.6676	0.0281571	5.79596	0.490753	1.15783	0.133735	1.37061
11	Saitama	68	Communication	0.849419	0	0.185341	0	0.689293	0.19027	0.0981404	0.271339	0.0530384	0.101344	0.295542	0.013209	1.10052	0.0328032	0.0340531	0	0.0327074	0	0	0.379824	1.16036	0	0.0571042	0.462022	0.247415	0.0661835	0.199433	0.0080257	0.139961	0	0.0607155	0.0435161	0.0181738	0.0301218	0.431843	2.80575	0.362669	1.08227	1.3034	0.203497	0	1.01369	0.193786	0.192875	0.0116212	0.13242
11	Saitama	69	Broadcasting	0	0	0	0	0	0	0	0	0	0	0	0	0	0	0	0	0	0	0	0	0	0	0	0	0	0	0	0	0	0	0	0	0	0	0	0	0	0	0	0	0	0	0	0	0	0
11	Saitama	70	Information services	0.83132	0	0.00981858	0	0.549853	0.377988	0.0194458	0.0596913	0.0291782	0.0662661	0.303872	0.00562305	0.339066	0.0461752	0.0101474	0	0.0652415	0.00264964	0	0.213137	0.218209	0	0.0162061	0.309774	0.0854805	0.048084	0.120574	0.00819966	0.0806638	0	0.0387697	0.0188616	0.0355882	0.0278438	0.100036	0.4706	0.2202	0.663838	1.93417	0.149757	0.00268498	0.961374	0.263982	0.431845	0.00263846	0.0952045
11	Saitama	71	﻿Internet based services	0.000144289	0	7.2062e-05	0	0.000845053	0.000231182	4.16266e-05	0.00031453	4.75886e-05	0.00011821	0.000197614	0	0.00131259	2.55083e-05	2.48252e-05	0	2.72505e-05	0	0	0.000251725	0.000820286	0	2.77532e-05	0.000736795	0.000125474	5.14653e-05	0.000182962	0	7.53479e-05	0	2.21312e-05	4.61438e-05	0	2.50962e-05	0.000409106	0.00198557	0.00033842	0.000639183	0.000958761	0.000136416	0	0.0012615	0.000226036	0.0002154	0	0.000128715
11	Saitama	72	Image information production and distribution industry	0.0177967	0	0.00656357	0	0.0313375	0.00579058	0.0113743	0.0295434	0.00216724	0.00457591	0.0134994	0.000657812	0.0235562	0.0217815	0.00254378	0	0.00310255	0	0	0.0226411	0.0150465	0	0.00221185	0.0222898	0.0221427	0.00498056	0.0249969	0.00106582	0.018301	0	0.00226774	0.00210144	0.00150844	0.00285728	0.00378446	0.055851	0.0250446	0.024171	0.0410641	0.00838692	0	0.0740038	0.00678466	0.0174392	0.000514434	0.0109909
11	Saitama	73	Public administration	0	0	0	0	0	0	0	0	0	0	0	0	0	0	0	0	0	0	0	0	0	0	0	0	0	0	0	0	0	0	0	0	0	0	0	0	0	0	0	0	0	0	0	0	0	0
11	Saitama	74	Education and Research	0.39411	0	0.0366644	0	3.12089	1.40034	0.108683	0.262154	0.0286728	0.178533	1.95797	0.0154719	0.171576	0.772554	0.448726	0	1.47988	0.125761	0	10.4064	5.79718	0.0169056	0.104789	4.86378	1.44144	1.23414	1.33754	0.112807	2.64117	0	0.371585	0.320654	0.00212872	0.274191	1.43171	3.9465	0.468006	5.71807	36.1638	0.153426	0.0424795	16.0345	2.46958	4.23376	0.190568	1.2598
11	Saitama	75	Medical service, health and social security and nursing care	0.859102	0	0.234518	0	1.80009	0.913088	0.0554192	0.309698	0.0686363	0.0577052	0.550544	0.00854681	0.562757	0.0679204	0.0550847	0	0.145119	0.00503419	0	0.821071	0.404474	0.0233471	0.0554234	0.490462	0.213451	0.0685179	0.371176	0.010386	0.122606	0	0.0883926	0.0460749	0.0705556	0.0167058	0.073756	1.13514	0.37546	0.50653	2.8112	0.635655	0.00510133	0.569318	0.0638339	0.0796585	0.00501295	0.109482
11	Saitama	76	Advertising and survery	0.0514474	0	0.0421651	0	1.9178	1.84961	0.0251178	0.1046	0.0156629	0.0849462	0.293287	0.0126776	0.114106	0.0321831	0.0183842	0	0.0186854	0.00124454	0	5.05871	0.492467	0	0.00228361	0.330843	0.0768593	0.0162331	0.0580678	0.00770279	0.053732	0	0.0218523	0.0113905	0.00872131	0.0240916	0.0343637	0.45746	0.0616594	0.323702	0.60482	0.0486402	0.00189171	0.426342	0.0760865	0.0781157	0.00867504	0.0670766
11	Saitama	77	Giids rental and leasing services	2.01111	0	0.28738	0	2.31088	0.607936	0.170114	0.307373	0.129653	0.142825	0.564399	0.0159693	1.27812	0.0302156	0.0352878	0	0.116206	0.00537492	0	0.441304	0.083671	0	0.309023	1.39642	0.532589	0.13107	1.12078	0.0277223	1.19599	0	0.10224	0.0737901	0.0847475	0.0445913	0.260474	1.75985	1.01936	2.04428	6.12733	1.08912	0.00544661	4.03715	0.197161	0.436591	0.021409	0.330348
11	Saitama	78	Other business services	15.5246	0	2.57768	0	15.4843	3.46632	0.454645	3.03089	0.953737	0.827299	3.51109	0.151124	15.8813	0.530153	0.515956	0	1.82623	0.043304	0	4.60713	1.52218	0.0223146	0.653326	8.49148	2.14656	1.981	6.04757	0.0744499	2.80708	0	0.474047	1.01286	0.219165	0.979311	1.87623	14.0646	2.96312	7.69281	17.8544	1.97307	0.0292544	9.99405	1.4599	2.28407	0.129364	1.39217
11	Saitama	79	Personal services	0.535801	0	0.00955695	0	0.182517	0.0367916	0	0.0195531	0.00473345	0	0.0524157	0	0.0752371	0	0	0	0.00542099	0	0	0.0350532	0.00906561	0	0	0.0502533	0.0124804	0	0.0155987	0	0.00499637	0	0	0	0	0.00998489	0.010173	0.0789988	0.019235	0.0590357	0.090823	0.010855	0	0.110589	0.00817561	0.0285666	0	0.00426759
11	Saitama	80	Activities not elsewhere classified	11.1409	0	0.536888	0	44.644	13.8105	14.7595	26.962	7.59065	21.6174	43.9013	2.46538	4.83692	4.14646	8.17173	0	19.712	9.40434	0	22.6076	0.37039	12.8278	0.112784	2.3526	0.679876	12.7579	34.3085	0.808414	11.6357	0	26.1719	0.281282	16.7448	0.203974	4.41612	46.8954	45.9246	19.9917	78.3424	40.081	0.700718	5.34376	0.709808	29.7133	1.7903	3.35641
12	Chiba	1	Agriculture, forestry and fishery	506.188	0	0.00922057	0	1042.49	23.1793	3.73904	0.0301839	112.216	0	1.13784	0	0	0.0489581	0.0667058	0	0.125525	0	0	0.144941	1.24201	0	0.117187	0	14.5056	0	0	0	0.00964102	0	0	0	0	0	0	0	0	0	0	0	0	0	0	0	0	0
12	Chiba	2	Metallic ores	0	0	0	0	0	0	0	0	0	0	0	0	0	0	0	0	0	0	0	0	0	0	0	0	0	0	0	0	0	0	0	0	0	0	0	0	0	0	0	0	0	0	0	0	0	0
12	Chiba	3	Non-metallic ores	0.10225	0	0.0310842	0	0	0	0	0	0	0	0.811824	0	0	0.400826	0.380914	0	0.0302261	0	0	0.0139606	0.0210615	-0.0194514	2.87314	0	0.0541237	1.52227	16.9842	0.402363	3.25944	0	0	0.021326	0	0.0881492	0.0141806	0.0302288	0.00893746	0	0	0.0100874	0	0	0	0	0	0
12	Chiba	4	Coal mining, crude petroleum and natural gas	0	0	0	0	1.73293e-05	0	0	0	0	0	0.0121348	0	0	0.00778099	1.78179e-05	0	0.00150602	4.88514e-05	0	3.61343e-05	1.63541e-05	0.0409316	0	0	0	0.000775708	0.000187597	0.000285557	0.00118976	0	0.00149313	0	0	5.40374e-05	0	3.35322e-05	0	0	8.19211e-05	0	0	6.13847e-05	0	0	0	0
12	Chiba	5	Food and Tobacco	781.678	0	0	0	1169.57	92.7121	-0.0185692	0.824312	0.0849151	0	7.26778	0.0171826	0	0.0682739	0.044297	0	0.41331	0	0	1.23521	10.4491	0	0	0.0939076	0	0	0	0.04176	0.358527	0	0	0	0	0	0	0	0	0	0	0	0	0	0	0	0	0
12	Chiba	6	Beverage	9.23738	0	0	0	13.5972	143.099	0	0	0	0	0	0	0	0	0	0	0	0	0	0	0.333781	0	0	0	0	0	0	0	0	0	0	0	0	0	0	0	0	0	0	0	0	0	0	0	0	0
12	Chiba	7	Textile products	2.0491	0	0	0	0.017634	0.0281409	9.17642	37.0422	0.0637205	0.448944	1.02634	0.014066	0.178734	0.0807306	0	0	0	0	0	0	0	0	0	0.199874	6.51669	0.00626467	0	0	0.0428018	0	0	0	0	0	0.0933729	0.113739	0.0470795	0.0333451	3.75683	0	0	0	0	0	0.0440006	0.00522266
12	Chiba	8	Wearing aparel and other textile products	11.1298	0	0.827756	0	4.46552	0.84708	0.063552	3.03554	0.425547	0.206255	0.785381	0.420046	0.24261	0.267044	0.0216577	0	0.0475472	0	0	0.285489	0.566537	0	0.726365	0.165288	0.446982	0.179595	0.376241	0.0918781	0.427273	0	0.106191	0.110705	0.0231171	0.0437884	0.289988	0.845738	0.46395	0.577545	1.02563	0.130911	0	2.02389	0.358539	0.104398	0.0197095	0.374308
12	Chiba	9	Timber and wooden products	5.24502	0	0.0924535	0	1.24681	0.19279	0	0.0882728	30.9777	10.9954	41.6007	0.0617723	0.0214071	0.0081816	0	0	0.0174808	0	0	0.0403695	0	0	0	0.162049	0.040245	0.280621	0.0503003	0.435376	0.265841	0	0	0.0962021	0	0	0.451062	1.64834	0.47295	0.0219657	0.0585745	0.0175017	0	0.102869	0.0197726	0	0	0.0137615
12	Chiba	10	Furniture and fixtures	0.752137	0	1.01423	0	4.68192	1.22919	0	1.22967	0.483729	13.9753	1.40782	0.240942	0.904561	0.119671	0.116466	0	0.340918	0.070959	0	1.57461	2.60119	0	0.0434009	2.33735	2.61625	0	0.613112	0.402585	0.628429	0	0.276874	0.180401	0	0.0784919	0.919665	0.840197	0.529227	0.892469	5.31904	0.0853317	0	1.57152	0.803363	0.187137	0.0706596	1.4761
12	Chiba	11	Pulp, paper, paperboard, building paper	0.210611	0	0	0	0.439173	0.109021	0.0841295	0.0503247	0.689283	0.637089	61.349	23.2218	24.7746	0	-0.00334487	0	0	0.103934	0	2.08248	0.239466	0	0	0.680731	0.935465	0.481932	0	0.107212	0.0101521	0	0	0	0.00357025	0	0.0585667	0.0503585	0.0390836	0.00615153	0.00615144	0.0220562	0	0.247754	0.0110747	0.0064494	0.00608795	0.0664801
12	Chiba	12	Paper products	167.093	0	0	0	108.26	50.3546	0.623547	3.16282	0.343226	2.67577	3.97126	0.192328	2.07359	1.24537	0.165275	0	0.423318	0.0755227	0	21.1439	24.398	0	0.0307948	4.27459	2.78451	5.22517	0.0290019	2.98635	1.81146	0	0	0	0.499834	0	0.0567427	0.0777594	3.91602	0.177308	0.126647	0.272459	0	3.48753	0.684024	0.132781	0.175476	0.428465
12	Chiba	13	Publishing, printing	0.104332	0	0.0193885	0	11.4445	0.823376	0.0776983	0.48395	0.0840252	0.155048	0.0598148	0.147679	11.6677	0.0283102	0.0325615	0	0.0137472	0.00915631	0	1.40449	0.473586	0	0.0112006	0.0743388	0.297503	0.238859	0.042194	0.016529	0.0228066	0	0.0223293	0.0395732	0.00267351	0.0126604	0.185745	0.27104	0.348765	0.324754	0.564282	0.06056	0.00231961	0.243772	0.153421	0.00241475	0.0319119	0.166662
12	Chiba	14	Chemical fertilizer	126.177	0	0	0	0	0.0158976	0	0	0	0	0	0	0	21.5581	0.97307	0	3.31684	0.0156016	0	0.311584	0.611088	0	0	0	0.0719035	0	0	0	0.0518141	0	0	0	0	0	0	0	0	0	0	0	0	0	0	0.0164581	0	0
12	Chiba	15	Basic inorganic chemical products	3.919	0	0.025924	0	31.0345	3.94211	0.561563	1.54875	0	0.076546	27.5359	0.270207	0.0240102	15.4991	18.2991	0	14.9402	1.05288	0	49.5527	27.7389	0	0.0898569	6.77036	39.2482	10.8865	0.36671	1.01031	0.515016	0	0.477697	0.149401	0.0285976	1.73343	0.827855	5.57156	0.860912	1.08402	2.78392	0.35334	0	1.49991	0.22177	0.439106	0.0243822	0.694571
12	Chiba	16	Basic organic chemical products	0	0	0	0	0.133117	0	0	0	0	0	0.363175	0	1.34924	14.9075	0	0	1161.98	13.1341	0	20.5403	2.3869	0	0	0.116064	2.99775	1.70249	0	0	0.276948	0	0	0.127204	0	0	0	0	0	0.629297	0	0	0	0	0	0	0	0
12	Chiba	17	Organic chemical products	0.743692	0	0.148569	0	128.427	126.83	4.76305	0.243172	1.61885	2.04717	72.7918	0.714709	4.67842	5.6797	23.0317	0	916.549	281.491	0	339.877	368.251	0	1.71654	232.542	1396.01	2.54652	0.484982	0.144751	85.2834	0	0	0	0	0	5.21881	0.577922	1.04657	0.141192	1.27071	0.337494	0	4.36407	1.01676	0.296057	0.55893	0.530738
12	Chiba	18	Synthetic resins	0	0	0	0	0	0	4.57143	0	0.248866	6.67637	9.41568	1.81289	8.3767	0	0	0	0	0	0	148.227	0	0	0	2259.23	5.90554	0	0	0	7.3553	0	0	0	0	0	19.7897	0.73296	2.0226	0	0	1.99749	0	73.7975	0	4.75608	1.89033	4.03871
12	Chiba	19	Synthetic fibers	0	0	0	0	0	0	0	0	0	0	0	0	0	0	0	0	0	0	0	0	0	0	0	0	0	0	0	0	0	0	0	0	0	0	0	0	0	0	0	0	0	0	0	0	0	0
12	Chiba	20	Final chemical products	262.957	0	3.32623	0	15.3213	5.12203	2.23049	1.51493	28.0208	7.6009	12.0826	15.8158	62.2564	1.04431	0.59785	0	3.24847	0.874201	0	59.621	16.4072	0.126696	7.7196	11.1025	18.8606	0.681674	4.53205	0.0845414	5.23198	0	0.266487	0.722315	0.0319067	0	1.60099	13.5576	10.5076	4.26058	20.0657	0.657043	0.0276831	6.12749	1.50933	1.84439	0.054407	1.26574
12	Chiba	21	Medicaments	33.2777	0	0	0	2.93722	0	0	0.0186833	0	0	0	0	0	0	0	0	0	0	0	0.765573	52.5802	0	0	0	0	0	0	0	0	0	0	0	0	0	0	0	0	0	0	0	0	0	0	0	0	0
12	Chiba	22	Petroleum refinery products	988.765	0	27.2614	0	233.229	75.7167	8.30523	11.6136	42.0482	2.69542	303.586	14.5717	33.6652	41.6401	17.3679	0	23.7249	27.6299	0	6.26162	23.6163	15.8129	212.285	20.2914	37.1721	27.0708	32.9146	3.27463	63.3868	0	17.6623	9.92388	5.08082	14.8263	9.54044	29.1745	16.0346	20.1111	26.8539	3.39332	0	4.65377	0.851914	4.46504	0	0.778209
12	Chiba	23	Coal products	0	0	0.0843314	0	0	0	0	0	0	0	0	0	0	1.43287	0.174312	0	5.93159	0	0	0	0	0	0	0	0	0	0	0	4.01205	0	6.2547	2.75402	0.0465144	0.308377	0.179536	0.246033	0	0.0400721	0.120215	0	0	0	0	0	0	0
12	Chiba	24	Plastic products	106.417	0	0	0	134.541	79.7325	0.716551	4.97917	5.11987	8.51726	6.31742	1.87073	83.8137	2.66593	0.946242	0	0.737132	0.0836875	0	30.239	44.77	0	0	449.548	160.217	3.13233	0.257099	0.143879	0.617629	0	0	0	0	0.185143	4.96731	8.07089	3.5369	3.17171	170.568	1.07348	0.0848037	43.3515	2.47605	29.8982	1.25002	9.89139
12	Chiba	25	Rubber products	3.37043	0	0.544155	0	0.336589	0.0460406	0.0518128	0.64597	0.0888507	0.153022	0.0929226	0.0910933	0.51506	0.0889008	0.01236	0	0.217081	0.0112958	0	0.181727	0.680676	0	0.103634	0.372077	50.4092	0	0.0715734	0	0.293863	0	0.369128	0.166563	0.00659643	0	0.0763825	3.29721	0.300881	5.27365	17.4346	0.264884	0.0400627	2.70393	0.450158	0.726875	0.0843612	1.58076
12	Chiba	26	Glass and glass products	0.238711	0	0	0	8.95755	42.7409	0	0.121959	0	8.38982	0	0	0.0276046	0	0.277228	0	0.0338125	0	0	4.43523	14.73	0	0	7.75778	2.51697	5.17252	0.194588	0	0.249312	0	0	0	0	0	1.9353	2.40573	0.80983	0.254925	0.254921	0	0.0285265	0.238771	0.127485	0.059393	0.0840967	0.0798549
12	Chiba	27	Cement and cement products	0.0184226	0	0	0	0	0	0	0	0	0	0	0	0	0	0	0	0	0	0	0	0	0	0.014174	0	0	0	25.356	0	0.0641355	0	0	0.0176748	0	0	0	0	0.0123454	0	0	0	0	0	0	0	0	0
12	Chiba	28	Pottery, china and earthenware	0	0	0	0	0	0	0	0	0	0	0	0	0	0	0	0	0	0	0	0	0	0	0	0	0	0	0	0	0	0	0	0	0	0	0	0	0	0	0	0	0	0	0	0	0	0
12	Chiba	29	Other ceramic, stone and clay products	15.0487	0	0	0	2.01239	0	0	0	0.125918	0.469172	4.09592	0	0.029433	0.134989	5.05789	0	0.108156	0.180094	0	0.432938	1.5977	0	4.44278	0.696266	0.747005	4.62999	21.4393	2.26026	10.334	0	0.292794	3.60182	0	14.2105	4.93884	8.46787	4.34934	34.7917	13.2581	1.58819	0	4.07338	1.25055	3.10303	0.089667	0.482485
12	Chiba	30	Pig iron and crude steel	0	0	0	0	0	0	0	0	0	0	0	0	0	0	0	0	0	0	0	0	0	0	0	0	0	0	0	0	0	0	4783.77	125.594	31.1286	0	0	-22.0308	-39.5961	-27.9504	-87.627	-0.451422	0	-6.72169	0	-0.395997	-0.373804	-0.7099
12	Chiba	31	steel products	5.10539	0	1.48737	0	0	0	0.276165	0	0.420959	20.5995	0	0	0	0	0	0	0	0	0	0	0	0	0	9.49699	52.0738	0	66.8186	0	4.33233	0	580.747	47.3488	263.344	0	1.69635	1172.86	652.818	452.63	640.215	41.9934	0.203368	173.91	8.27055	26.5695	2.6979	5.8827
12	Chiba	32	Cast and forged steel products	0.42708	0	0.0304709	0	0	0	0	0	0	0.179944	0	0	0	0	0	0	0	0	0	0	0	0	0	0	0	0	0.0663121	0.207815	0.127441	0	0	0.760953	0	0	0.583834	28.299	4.44628	112.009	74.1893	14.7782	0.029164	21.0203	1.955	0.759004	0.0286587	0.0816395
12	Chiba	33	Other iron or steel products	0	0	0	0	0	0	0	0	0	24.8796	0	0	0	0	0	0	0	0	0	0.18082	0	0	0	0.226825	0	0	6.85293	0.168113	2.25518	0	0	1.32585	0	0	2.47954	634.279	327.919	219.322	134.707	4.60557	0.0825728	29.7961	0	8.68192	2.02855	1.30984
12	Chiba	34	Non-ferrous metals	0	0	0	0	0	0	0.0130312	0	0	0.0370056	0	0	-0.195007	0	1.70196	0	0.221799	0	0	3.71158	0	0	0	0.0922613	-0.0130932	0.47528	0	0.256425	0.345952	0	0.0692817	0.13723	-0.00829517	18.6981	52.9891	-0.665459	3.08746	-0.0214388	1.08622	0.0427048	0	1.43239	0.0707605	13.6585	0.00707242	0.0335785
12	Chiba	35	Non-ferrous metal products	0	0	0	0	11.1705	5.09861	0.0408024	0	0.163262	2.24787	0	0.0188778	3.72897	0	0	0	0	0	0	0.419459	1.31774	0	0	2.16662	2.93126	0.0252232	0	0.06882	0.886273	0	0	0	0	0.516586	15.6142	253.815	30.5893	69.4998	78.5162	6.20436	0.0450703	45.5209	7.89563	41.9924	0.907933	6.93916
12	Chiba	36	Metal products for construction and architecture	0.198886	0	0	0	0	0	0	0	0.0281124	0.391054	0	0	0	0	0	0	0	0	0	0	0	0	0	0	0	0	0.308807	0	0	0	0	0	0	0	0.0604186	28.5649	1.08527	1.61824	0	0.22564	0	0	0	0	0	0.0253456
12	Chiba	37	Other metal products	15.2191	0	13.43	0	59.0543	152.82	0.0921114	3.21896	7.16068	17.2988	2.9476	0.397755	1.27995	0	2.3072	0	2.9346	0.468566	0	16.302	23.7311	0	1.10542	3.75764	101.311	1.59436	13.341	1.82981	6.55805	0	0.032648	1.80389	0	0.92555	4.14916	171.474	72.3181	115.407	219.799	8.93508	0.474815	49.2368	11.216	3.98963	1.16647	5.94959
12	Chiba	38	General industrial machinery	0.220919	0	0.80911	0	0	0	0	0	0	0.090495	0	0	0	0	0	0	0	0	0	0	0	0	0.0212463	4.80247	0	0	0	0.125414	0.499912	0	0	0.194288	0.0405707	0.0576368	0.215317	0.590135	0.610678	374.489	136.449	1.67091	0.123201	5.79441	1.46298	0.0916101	0.276723	0.213497
12	Chiba	39	Special industrial machinery	0	0	0	0	0	0	0	0	0	0	0	0	0	0	0	0	0	0	0	0	0	0	0	0	0	0	0	0	0	0	0	0	0	0	0	0	0	3.35371	527.455	0	0	0	0	0.123372	0	0
12	Chiba	40	Other general machines	0	0	0.646328	0	0	0	0	0	0.0417546	0.926551	0	0	0	0	0	0	0	0	0	0.0147243	0	0	0	0.270902	0	0	0	0.246412	0.308518	0	0	0.134957	0	0	0.358953	0.642208	0.452468	16.077	43.1161	10.5968	0.0134479	5.00272	1.45439	0.279991	0.10572	0.376452
12	Chiba	41	Machinery for office and service industry	0	0	0	0	0	0	0	0	0	0	0	0	0	0	0	0	0	0	0	0	0	0	0	0	0	0	0	0	0	0	0	0	0	0	0	0	0	0	0	0	0.222137	0	0	0	0	0
12	Chiba	42	Industrial electric equipment	0.108811	0	0.00543433	0	0	0	0	0	0.00538312	0.0106973	0	0	0	0	0	0	0	0	0	0	0	0	0	0.00476255	0	0	0	0	0	0	0	0	0	0	0	1.24721	0.0328126	26.5249	23.5343	0.0925862	0.0468111	57.6598	1.93393	0.714724	0.168667	0.713439
12	Chiba	43	Applied electric equipment and electric mesuring instruments	0	0	0	0	0	0	0	0	0	0	0	0	0	0	0	0	0	0	0	0	0	0	0	0	0	0	0	0	0	0	0	0	0	0	0	0	0	0.595452	11.9439	0.083725	0	11.6465	14.7873	0	0	0
12	Chiba	44	Other electric equipment	0.0848097	0	0.00423564	0	0.00425746	0	0	0	0	0.0291821	0	0	0	0	0	0	0	0	0	0.0443875	0	0	0	0.00371204	0	0	0	0	0	0	0	0	0	0	0.00450869	0	0.0980371	1.32031	4.80215	0.0336765	0.00405397	2.20937	0.594243	3.26225	0.0557722	0.359366
12	Chiba	45	Household electric and electric applications	0	0	0	0	0	0	0	0	0	0	0	0	0	0	0	0	0	0	0	0	0	0	0	0	0	0	0	0	0	0	0	0	0	0	0	0	0	0	0	0	0	0	0	0	0.698418	0
12	Chiba	46	Communication equipment	0.00485985	0	0	0	0	0.00233597	0	0	0	0	0	0	0.00224797	0	0	0	0	0	0	0	0.0322331	0	0	0	0.00422615	0	0	0	0	0	0	0	0	0	0.00258361	0.00944145	0	0.025373	0.011533	0	0	0.00216047	0.00415267	0	0	0.1474
12	Chiba	47	Electric computing equipment and accessory equipment	0	0	0	0	0	0	0	0	0	0	0	0	0	0	0	0	0	0	0	0	0	0	0	0	0	0	0	0	0	0	0	0	0	0	0	0	0	0	0.0506107	0	0	0	0	0	0	0.0021619
12	Chiba	48	Semiconductor devices and integrated circuits	0	0	0	0	0	0	0	0	0	0	0	0	0	0	0	0	0	0	0	0	0	0	0	0	0	0	0	0	0	0	0	0	0	0	0	0	0.00580564	0.0114222	0.205596	0.00327632	0.00414123	0.670144	0.890398	0.000479009	0.0293907	0.292822
12	Chiba	49	Other electrical equipment	0	0	0	0	0	0	0	0	0	0	0	0	5.063	0	0	0	0	0	0	0	0.0563643	0	0	0	0	0	0	0	0	0	0	0	0	0	0.189749	0.0577841	3.76713	10.1079	170.929	0.337447	1.02367	120.432	155.034	0.0592031	5.75618	77.5831
12	Chiba	50	Passenger motor cars	0	0	0	0	0	0	0	0	0	0	0	0	0	0	0	0	0	0	0	0	0	0	0	0	0	0	0	0	0	0	0	0	0	0	0	0	0	0	0	0	0	0	0	0	0	0
12	Chiba	51	Other cars	0	0	0	0	0	0	0	0	0	0	0	0	0	0	0	0	0	0	0	0	0	0	0	0	0	0	0	0	0	0	0	0	0	0	0	0	0	0	0	0	0	0	0	0	0	0
12	Chiba	52	Motor vheicle parts and accessories	0	0	0	0	0	0	0	0	0	0	0	0	0	0	0	0	0	0	0	0	0	0	0	0	0	0	0	0	0	0	0	0	0	0	0	0	0	0	0.00184013	0	0	0	0	0	0	0
12	Chiba	53	Other transportation equipment	3.71952	0	0.00410982	0	0	0	0	0	0	0	0	0	0	0	0	0	0	0	0	0	0	0	0	0	0	0	0	0	0	0	0	0	0	0	0	0	0	0	0	0	0	0	0	0	0	0
12	Chiba	54	Precision instruments	0.535394	0	0	0	0.0158099	0	0	0	0	0	0.115022	0.025222	0	0	0	0	0	0	0	0.0164831	0.0447607	0	0	0.0827072	0.0273871	0	0	0.0153247	0.0164461	0	0	0	0	0	0	0.0458883	0	5.26166	20.5232	0	0	1.80609	0.255654	0	0	0.196662
12	Chiba	55	Miscellaneous manufacturing products	6.79087	0	1.97745	0	1.57162	1.17288	0.0199234	16.7853	0.956632	2.35364	0.315275	0.165921	0.127777	0.0244176	0	0	0	0	0	0.0240962	0	0	0.132833	0.241814	0.080073	0.665075	0.0250199	0.761694	0.0480842	0	0	0.463794	0	0	1.78674	0.603745	0.0694179	0.764817	2.09776	0.0261166	0	0.204672	0.393403	0.02291	0	0.164282
12	Chiba	56	Reuse and recycling	0.0602694	0	0	0	0.0827497	0.176788	0.00178333	0	0	0	1.13962	0	0	0.227849	0.0255249	0	0.00642092	0	0	0.000539208	0	0.00225385	0	0.806263	0.00134386	0.0639401	0.0946192	0.0380998	0.00268999	0	0.100027	0.215477	0.0522193	0.582731	0.136926	0	0.000517796	0	0	0	0	0	0	0	0	0
12	Chiba	57	Building construction and repair of construction	0	0	0	0	0	0	0	0	0	0	0	0	0	0	0	0	0	0	0	0	0	0	0	0	0	0	0	0	0	0	0	0	0	0	0	0	0	0	0	0	0	0	0	0	0	0
12	Chiba	58	Public construction	0	0	0	0	0	0	0	0	0	0	0	0	0	0	0	0	0	0	0	0	0	0	0	0	0	0	0	0	0	0	0	0	0	0	0	0	0	0	0	0	0	0	0	0	0	0
12	Chiba	59	Other civil enginnering and construction	0	0	0	0	0	0	0	0	0	0	0	0	0	0	0	0	0	0	0	0	0	0	0	0	0	0	0	0	0	0	0	0	0	0	0	0	0	0	0	0	0	0	0	0	0	0
12	Chiba	60	Electricity	102.415	0	11.8653	0	115.331	19.9996	12.1982	10.9176	21.9821	2.61971	73.0783	5.27085	27.0278	8.7179	13.0581	0	24.0473	5.30054	0	9.88015	21.2024	1.26423	4.1868	72.4523	20.7994	5.97757	8.82822	0.96857	22.9684	0	41.9846	18.7582	2.68854	1.84273	8.29493	36.581	25.2363	23.4665	58.0559	6.88409	0.0306928	17.4123	3.15482	18.3403	0.271449	1.40335
12	Chiba	61	Gas supply and heat supply	0.182192	0	0.0606613	0	53.5349	12.4354	0.6833	0.397154	0.300448	0.179115	44.4156	0.729549	0.449464	3.80067	0.626931	0	1.58281	11.7455	0	0.953551	11.451	0	0.28035	9.46293	7.49927	7.27829	0.660069	0.591025	1.33198	0	11.0662	3.14633	0.133835	0.126755	2.00173	7.55099	5.18888	4.49665	5.36131	0.757903	0	3.88772	0.415148	3.62645	0	0.0541758
12	Chiba	62	Water supply and waste management services	0.525794	0	0.121515	0	1.42636	0.479695	0.0428299	0.0269685	0.0510044	0.0101356	0.773771	0.0181645	0.158326	0.139977	0.0702427	0	0.231315	0.0525231	0	0.332385	0.261796	0	0.0142777	0.196743	0.177514	0.0264765	0.387707	0.0100333	0.12921	0	0.081596	0.0356083	0.0227199	0.0129108	0.0635783	0.280408	0.103632	0.1605	0.645907	0.123984	0	0.15033	0.0158571	0.100553	0.00193709	0.0110363
12	Chiba	63	Commerce	45.6013	0	1.10125	0	69.2401	11.5399	1.55025	6.09919	3.51096	2.35299	12.3787	0.378409	15.5736	0.73705	0.532406	0	1.96323	0.0786663	0	6.19053	1.38407	0.0675613	1.5967	14.9093	2.67214	0.875717	3.65866	0.15929	2.12554	0	1.23631	0.885907	2.00429	0.828276	2.46926	16.5712	4.66263	18.0057	38.1656	2.47011	0.0620009	13.3885	2.45152	4.45968	0.237904	1.29207
12	Chiba	64	Financial and insurance	0.057253	0	0.010255	0	0.0166851	0.00942618	0.00283919	0.00956538	0.00248253	0.00180036	0.00959789	0.000259831	0.0132665	0.00116243	0.000662407	0	0.00206698	8.84254e-05	0	0.00707143	0.0013731	0.000157727	0.00027458	0.00374262	0.00183075	0.00152754	0.00877652	0.000273644	0.00230417	0	0.00120759	0.000643293	0.000905648	0.00225721	0.00142584	0.0212693	0.00321776	0.00818541	0.0216267	0.00403258	2.0678e-05	0.00852569	0.000689995	0.00274817	8.80523e-05	0.000887564
12	Chiba	65	Real estate agencies and rental services	0	0	0	0	0	0	0	0	0	0	0	0	0	0	0	0	0	0	0	0	0	0	0	0	0	0	0	0	0	0	0	0	0	0	0	0	0	0	0	0	0	0	0	0	0	0
12	Chiba	66	House rent	0	0	0	0	0	0	0	0	0	0	0	0	0	0	0	0	0	0	0	0	0	0	0	0	0	0	0	0	0	0	0	0	0	0	0	0	0	0	0	0	0	0	0	0	0	0
12	Chiba	67	Transport	177.307	0.00645651	47.1318	0	60.0355	6.78365	1.78109	4.19124	5.69785	2.65539	18.8004	0.412022	11.8285	1.62474	0.893215	0	5.01501	0.0606717	0	5.4465	1.37932	0.588334	4.51378	4.94888	1.271	1.93931	31.6378	0.125171	2.11876	0	1.73246	1.98559	0.618422	1.53138	4.57504	26.0494	7.62201	15.6612	29.5683	3.1771	0.033535	6.90296	0.584485	1.37896	0.159278	1.63239
12	Chiba	68	Communication	0.416483	0	0.0908755	0	0.337971	0.0932922	0.0481197	0.133041	0.0260055	0.0496905	0.144909	0.00647658	0.539602	0.0160839	0.0166968	0	0.016037	0	0	0.186234	0.568943	0	0.0279991	0.226536	0.121312	0.0324508	0.0977849	0.00393512	0.0686251	0	0.0297698	0.0213366	0.00891091	0.0147692	0.211739	1.3757	0.177822	0.530654	0.639079	0.0997776	0	0.497028	0.0950162	0.0945694	0.00569805	0.0649277
12	Chiba	69	Broadcasting	0	0	0	0	0	0	0	0	0	0	0	0	0	0	0	0	0	0	0	0	0	0	0	0	0	0	0	0	0	0	0	0	0	0	0	0	0	0	0	0	0	0	0	0	0	0
12	Chiba	70	Information services	0	0	0	0	0	0	0	0	0	0	0	0	0	0	0	0	0	0	0	0	0	0	0	0	0	0	0	0	0	0	0	0	0	0	0	0	0	0	0	0	0	0	0	0	0	0
12	Chiba	71	﻿Internet based services	0	0	0	0	0	0	0	0	0	0	0	0	0	0	0	0	0	0	0	0	0	0	0	0	0	0	0	0	0	0	0	0	0	0	0	0	0	0	0	0	0	0	0	0	0	0
12	Chiba	72	Image information production and distribution industry	0.0102631	0	0.00378514	0	0.018072	0.00333936	0.00655946	0.0170373	0.00124982	0.00263888	0.00778495	0.000379353	0.0135846	0.0125611	0.00146697	0	0.00178921	0	0	0.0130569	0.00867714	0	0.00127555	0.0128543	0.0127695	0.00287223	0.0144154	0.000614646	0.010554	0	0.00130778	0.00121188	0.000869899	0.00164776	0.00218246	0.0322087	0.0144429	0.0139391	0.0236812	0.00483664	0	0.0426772	0.00391264	0.010057	0.000296668	0.00633836
12	Chiba	73	Public administration	0	0	0	0	0	0	0	0	0	0	0	0	0	0	0	0	0	0	0	0	0	0	0	0	0	0	0	0	0	0	0	0	0	0	0	0	0	0	0	0	0	0	0	0	0	0
12	Chiba	74	Education and Research	0.195201	0	0.0181597	0	1.54576	0.693581	0.0538301	0.129844	0.0142015	0.0884266	0.969772	0.00766315	0.0849808	0.382643	0.222252	0	0.73298	0.062289	0	5.15426	2.87132	0.00837328	0.0519017	2.40901	0.71394	0.611266	0.66248	0.0558729	1.30816	0	0.184045	0.158818	0.00105435	0.135806	0.70912	1.95469	0.231801	2.83214	17.9118	0.0759912	0.0210399	7.94184	1.22317	2.09697	0.0943877	0.623974
12	Chiba	75	Medical service, health and social security and nursing care	0.0845084	0	0.0230691	0	0.177071	0.0898189	0.00545149	0.0304644	0.00675164	0.00567636	0.0541561	0.000840735	0.0553575	0.00668122	0.00541858	0	0.0142751	0.000495205	0	0.0807674	0.0397874	0.00229661	0.00545191	0.048246	0.0209969	0.00673999	0.036512	0.00102165	0.0120605	0	0.00869504	0.00453231	0.00694044	0.00164332	0.00725525	0.111662	0.0369334	0.0498265	0.276533	0.0625283	0.000501809	0.0560029	0.00627924	0.00783588	0.000493115	0.0107696
12	Chiba	76	Advertising and survery	0	0	0	0	0	0	0	0	0	0	0	0	0	0	0	0	0	0	0	0	0	0	0	0	0	0	0	0	0	0	0	0	0	0	0	0	0	0	0	0	0	0	0	0	0	0
12	Chiba	77	Giids rental and leasing services	2.19191	0	0.313215	0	2.51863	0.662589	0.185407	0.335006	0.141308	0.155665	0.615137	0.0174049	1.39302	0.032932	0.0384601	0	0.126652	0.00585812	0	0.480976	0.0911928	0	0.336804	1.52196	0.580468	0.142853	1.22154	0.0302145	1.3035	0	0.111431	0.0804237	0.0923661	0.0486	0.28389	1.91805	1.111	2.22805	6.67817	1.18703	0.00593625	4.40008	0.214886	0.475839	0.0233336	0.360046
12	Chiba	78	Other business services	15.3353	0	2.54625	0	15.2955	3.42405	0.449101	2.99393	0.942108	0.817211	3.46827	0.149281	15.6877	0.523689	0.509665	0	1.80396	0.042776	0	4.55095	1.50362	0.0220425	0.64536	8.38793	2.12038	1.95685	5.97383	0.0735421	2.77285	0	0.468266	1.00051	0.216493	0.96737	1.85335	13.8931	2.92699	7.59901	17.6367	1.94901	0.0288977	9.87219	1.4421	2.25622	0.127786	1.3752
12	Chiba	79	Personal services	1.08692	0	0.0193871	0	0.370253	0.0746352	0	0.0396653	0.00960222	0	0.10633	0	0.152625	0	0	0	0.010997	0	0	0.0711087	0.0183904	0	0	0.101943	0.0253177	0	0.0316433	0	0.0101356	0	0	0	0	0.0202552	0.0206369	0.160256	0.03902	0.119759	0.184243	0.0220203	0	0.224341	0.016585	0.05795	0	0.00865719
12	Chiba	80	Activities not elsewhere classified	0	0	0	0	0	0	0	0	0	0	0	0	0	0	0	0	0	0	0	0	0	0	0	0	0	0	0	0	0	0	0	0	0	0	0	0	0	0	0	0	0	0	0	0	0	0
13	Tokyo	1	Agriculture, forestry and fishery	29.2193	0	0.00053225	0	60.1769	1.33801	0.215833	0.00174234	6.4776	0	0.0656811	0	0	0.00282606	0.00385054	0	0.0072458	0	0	0.00836657	0.0716938	0	0.00676451	0	0.837322	0	0	0	0.00055652	0	0	0	0	0	0	0	0	0	0	0	0	0	0	0	0	0
13	Tokyo	2	Metallic ores	0	0	0	0	0	0	0	0	0	0	0	0	0	0	0	0	0	0	0	0	0	0	0	0	0	0	0	0	0	0	0	0	0	0	0	0	0	0	0	0	0	0	0	0	0	0
13	Tokyo	3	Non-metallic ores	0.00191546	0	0.0005823	0	0	0	0	0	0	0	0.0152079	0	0	0.0075087	0.00713568	0	0.000566226	0	0	0.000261524	0.000394545	-0.000364384	0.0538227	0	0.0010139	0.0285167	0.318165	0.00753748	0.0610593	0	0	0.000399501	0	0.0016513	0.000265645	0.000566278	0.000167426	0	0	0.000188968	0	0	0	0	0	0
13	Tokyo	4	Coal mining, crude petroleum and natural gas	0	0	0	0	0	0	0	0	0	0	0	0	0	0	0	0	0	0	0	0	0	0	0	0	0	0	0	0	0	0	0	0	0	0	0	0	0	0	0	0	0	0	0	0	0	0
13	Tokyo	5	Food and Tobacco	417.664	0	0	0	624.923	49.5376	-0.00992183	0.440444	0.0453716	0	3.8833	0.00918094	0	0.0364799	0.0236686	0	0.220838	0	0	0.659993	5.58311	0	0	0.0501764	0	0	0	0.0223131	0.191567	0	0	0	0	0	0	0	0	0	0	0	0	0	0	0	0	0
13	Tokyo	6	Beverage	1.99077	0	0	0	2.93035	30.8396	0	0	0	0	0	0	0	0	0	0	0	0	0	0	0.0719338	0	0	0	0	0	0	0	0	0	0	0	0	0	0	0	0	0	0	0	0	0	0	0	0	0
13	Tokyo	7	Textile products	1.75731	0	0	0	0.015123	0.0241337	7.86972	31.7674	0.0546469	0.385016	0.880191	0.0120631	0.153282	0.0692348	0	0	0	0	0	0	0	0	0	0.171413	5.58873	0.0053726	0	0	0.0367069	0	0	0	0	0	0.0800768	0.0975431	0.0403755	0.0285968	3.22187	0	0	0	0	0	0.037735	0.00447897
13	Tokyo	8	Wearing aparel and other textile products	19.0475	0	1.41662	0	7.6423	1.44969	0.108763	5.19502	0.728282	0.352986	1.3441	0.718867	0.415204	0.45702	0.0370651	0	0.0813724	0	0	0.488587	0.969572	0	1.2431	0.282874	0.764966	0.30736	0.643901	0.15724	0.731236	0	0.181736	0.189461	0.0395626	0.0749396	0.496286	1.4474	0.794005	0.988411	1.75526	0.224042	0	3.46368	0.613604	0.178668	0.0337309	0.640591
13	Tokyo	9	Timber and wooden products	4.49362	0	0.0792087	0	1.06819	0.165171	0	0.0756269	26.5399	9.42018	35.641	0.0529228	0.0183403	0.00700951	0	0	0.0149765	0	0	0.0345862	0	0	0	0.138834	0.0344795	0.24042	0.0430943	0.373004	0.227756	0	0	0.0824202	0	0	0.386443	1.4122	0.405195	0.0188189	0.0501831	0.0149945	0	0.088132	0.01694	0	0	0.01179
13	Tokyo	10	Furniture and fixtures	0.36194	0	0.488061	0	2.25301	0.591506	0	0.591735	0.232778	6.72514	0.677462	0.115945	0.435288	0.0575874	0.0560453	0	0.164055	0.0341466	0	0.757724	1.25173	0	0.0208852	1.12477	1.25898	0	0.295039	0.19373	0.302409	0	0.133236	0.0868119	0	0.0377715	0.442557	0.404315	0.254672	0.42947	2.5596	0.0410629	0	0.756239	0.38659	0.0900531	0.0340025	0.710324
13	Tokyo	11	Pulp, paper, paperboard, building paper	0.506667	0	0	0	1.05652	0.262272	0.202391	0.121066	1.65821	1.53265	147.588	55.865	59.6005	0	-0.00804677	0	0	0.250034	0	5.00983	0.576084	0	0	1.63764	2.25045	1.15939	0	0.257921	0.0244231	0	0	0	0.00858897	0	0.140894	0.121148	0.0940238	0.0147988	0.0147986	0.0530608	0	0.596023	0.0266425	0.0155154	0.0146458	0.159932
13	Tokyo	12	Paper products	158.764	0	0	0	102.864	47.8447	0.592467	3.00517	0.326118	2.5424	3.77331	0.182742	1.97023	1.1833	0.157037	0	0.402218	0.0717583	0	20.09	23.1819	0	0.0292599	4.06152	2.64572	4.96472	0.0275563	2.8375	1.72117	0	0	0	0.47492	0	0.0539144	0.0738835	3.72083	0.168471	0.120335	0.258878	0	3.31369	0.649929	0.126163	0.166729	0.407108
13	Tokyo	13	Publishing, printing	1.08505	0	0.201639	0	119.022	8.56306	0.808057	5.03305	0.873857	1.61249	0.62207	1.53585	121.343	0.294424	0.338638	0	0.14297	0.095225	0	14.6066	4.92526	0	0.116486	0.773119	3.09401	2.48412	0.438815	0.1719	0.237188	0	0.232223	0.411559	0.0278043	0.131667	1.93174	2.8188	3.62713	3.37742	5.86849	0.62982	0.0241238	2.53521	1.59557	0.0251132	0.331881	1.73328
13	Tokyo	14	Chemical fertilizer	3.142	0	0	0	0	0.000395873	0	0	0	0	0	0	0	0.536827	0.0242309	0	0.0825941	0.000388502	0	0.00775889	0.015217	0	0	0	0.0017905	0	0	0	0.00129025	0	0	0	0	0	0	0	0	0	0	0	0	0	0	0.000409831	0	0
13	Tokyo	15	Basic inorganic chemical products	1.92122	0	0.0127088	0	15.2141	1.93255	0.275296	0.759246	0	0.0375253	13.499	0.132464	0.0117705	7.59815	8.97081	0	7.32414	0.516153	0	24.2923	13.5985	0	0.0440507	3.31904	19.2407	5.3369	0.179773	0.495287	0.252477	0	0.234182	0.0732408	0.0140194	0.849781	0.405841	2.73135	0.422046	0.53142	1.36476	0.173218	0	0.735305	0.108719	0.215263	0.0119529	0.3405
13	Tokyo	16	Basic organic chemical products	0	0	0	0	0	0	0	0	0	0	0	0	0	0	0	0	0	0	0	0	0	0	0	0	0	0	0	0	0	0	0	0	0	0	0	0	0	0	0	0	0	0	0	0	0	0
13	Tokyo	17	Organic chemical products	0.0101943	0	0.00203653	0	1.76044	1.73854	0.0652904	0.00333333	0.0221907	0.028062	0.997808	0.00979702	0.0641304	0.0778556	0.315711	0	12.5638	3.85859	0	4.65893	5.04787	0	0.0235299	3.18762	19.136	0.0349069	0.00664798	0.0019842	1.16904	0	0	0	0	0	0.0715379	0.00792197	0.014346	0.00193541	0.0174185	0.00462627	0	0.0598213	0.0139374	0.00405826	0.00766164	0.00727519
13	Tokyo	18	Synthetic resins	0	0	0	0	0	0	0.00206846	0	0.000112605	0.00302089	0.00426036	0.000820285	0.00379024	0	0	0	0	0	0	0.0670688	0	0	0	1.02224	0.0026721	0	0	0	0.00332808	0	0	0	0	0	0.00895435	0.000331646	0.000915175	0	0	0.000903813	0	0.0333915	0	0.002152	0.000855325	0.00182741
13	Tokyo	19	Synthetic fibers	0	0	0	0	0	0	0	0	0	0	0	0	0	0	0	0	0	0	0	0	0	0	0	0	0	0	0	0	0	0	0	0	0	0	0	0	0	0	0	0	0	0	0	0	0	0
13	Tokyo	20	Final chemical products	419.495	0	5.30633	0	24.4421	8.17117	3.5583	2.41676	44.7017	12.1257	19.2754	25.2309	99.3177	1.66599	0.95375	0	5.18229	1.39461	0	95.1134	26.1743	0.202119	12.3151	17.7119	30.0883	1.08747	7.22997	0.134869	8.34657	0	0.425126	1.15231	0.0509008	0	2.55406	21.6285	16.7628	6.7969	32.0107	1.04818	0.0441629	9.77518	2.40784	2.94235	0.0867955	2.01923
13	Tokyo	21	Medicaments	25.7279	0	0	0	2.27084	0	0	0.0144445	0	0	0	0	0	0	0	0	0	0	0	0.591885	40.6512	0	0	0	0	0	0	0	0	0	0	0	0	0	0	0	0	0	0	0	0	0	0	0	0	0
13	Tokyo	22	Petroleum refinery products	4.13048	0	0.113882	0	0.974292	0.3163	0.0346944	0.0485147	0.175653	0.0112599	1.2682	0.0608718	0.140633	0.173948	0.0725527	0	0.0991085	0.115421	0	0.0261574	0.0986552	0.0660572	0.886802	0.0847654	0.155283	0.113086	0.137498	0.0136795	0.264793	0	0.0737826	0.0414562	0.0212247	0.0619357	0.0398543	0.121874	0.0669831	0.0840124	0.11218	0.0141753	0	0.0194407	0.00355879	0.0186523	0	0.0032509
13	Tokyo	23	Coal products	0	0	0.00158158	0	0	0	0	0	0	0	0	0	0	0.0268724	0.0032691	0	0.111243	0	0	0	0	0	0	0	0	0	0	0	0.0752431	0	0.117302	0.0516497	0.000872344	0.00578339	0.00336706	0.00461417	0	0.000751523	0.00225454	0	0	0	0	0	0	0
13	Tokyo	24	Plastic products	60.6739	0	0	0	76.7087	45.4597	0.408543	2.83888	2.91911	4.85614	3.60189	1.0666	47.7866	1.51998	0.539502	0	0.420277	0.0477147	0	17.2409	25.5257	0	0	256.311	91.3482	1.78591	0.146586	0.0820328	0.352143	0	0	0	0	0.10556	2.83212	4.60164	2.01657	1.80836	97.2499	0.612045	0.048351	24.717	1.41173	17.0465	0.7127	5.6396
13	Tokyo	25	Rubber products	8.77618	0	1.41691	0	0.876436	0.119884	0.134914	1.68202	0.231356	0.39845	0.241959	0.237195	1.34115	0.231486	0.0321839	0	0.56525	0.0294129	0	0.473195	1.77239	0	0.269849	0.968843	131.259	0	0.186368	0	0.765181	0	0.961163	0.433709	0.0171763	0	0.19889	8.58552	0.783455	13.7319	45.3976	0.689724	0.104318	7.0407	1.17215	1.89269	0.219666	4.1161
13	Tokyo	26	Glass and glass products	0.076176	0	0	0	2.85847	13.6392	0	0.0389188	0	2.6773	0	0	0.00880898	0	0.0884672	0	0.01079	0	0	1.41534	4.70054	0	0	2.47561	0.803198	1.65062	0.0620956	0	0.0795586	0	0	0	0	0	0.61758	0.767702	0.258428	0.0813499	0.0813487	0	0.00910317	0.0761948	0.0406821	0.0189531	0.0268364	0.0254828
13	Tokyo	27	Cement and cement products	0.0078063	0	0	0	0	0	0	0	0	0	0	0	0	0	0	0	0	0	0	0	0	0	0.00600601	0	0	0	10.7442	0	0.0271765	0	0	0.00748942	0	0	0	0	0.00523119	0	0	0	0	0	0	0	0	0
13	Tokyo	28	Pottery, china and earthenware	0	0	0	0	0.0227228	0.000988957	0	0	0	0.02225	0	0	0	0	0.00106198	0	0	0	0	0	0	0	0	0.00360215	0	0	0.00559056	0.0330381	0	0	0	0	0	0	0	0	0.00310221	0.00390616	0.0039061	0	0	0.114332	0	0.00204765	0	0.0201894
13	Tokyo	29	Other ceramic, stone and clay products	4.24808	0	0	0	0.568077	0	0	0	0.0355454	0.132442	1.15623	0	0.00830863	0.0381059	1.42779	0	0.0305314	0.0508386	0	0.122214	0.451013	0	1.25415	0.196548	0.210872	1.307	6.05208	0.638047	2.91717	0	0.0826526	1.01676	0	4.01147	1.39418	2.39039	1.22777	9.82134	3.74263	0.44833	0	1.14987	0.353016	0.875952	0.0253121	0.1362
13	Tokyo	30	Pig iron and crude steel	0	0	0	0	0	0	0	0	0	0	0	0	0	0	0	0	0	0	0	0	0	0	0	0	0	0	0	0	0	0	0	0	0	0	0	0	0	0	0	0	0	0	0	0	0	0
13	Tokyo	31	steel products	0.323001	0	0.0941009	0	0	0	0.017472	0	0.0266326	1.30326	0	0	0	0	0	0	0	0	0	0	0	0	0	0.600841	3.29453	0	4.22738	0	0.274092	0	36.7419	2.99559	16.6608	0	0.107322	74.2029	41.3015	28.6363	40.5042	2.65677	0.0128664	11.0027	0.523249	1.68096	0.170687	0.372178
13	Tokyo	32	Cast and forged steel products	0.119474	0	0.00852408	0	0	0	0	0	0	0.0503383	0	0	0	0	0	0	0	0	0	0	0	0	0	0	0	0	0.0185505	0.0581353	0.0356511	0	0	0.212873	0	0	0.163324	7.9165	1.24382	31.334	20.7541	4.13414	0.00815846	5.88031	0.546902	0.212327	0.00801711	0.0228382
13	Tokyo	33	Other iron or steel products	0	0	0	0	0	0	0	0	0	8.76618	0	0	0	0	0	0	0	0	0	0.063711	0	0	0	0.0799206	0	0	2.41459	0.0592335	0.7946	0	0	0.467157	0	0	0.873652	223.485	115.54	77.2769	47.4632	1.62275	0.0290941	10.4985	0	3.05903	0.71475	0.461515
13	Tokyo	34	Non-ferrous metals	0	0	0	0	0	0	0.0192727	0	0	0.0547301	0	0	-0.288409	0	2.51715	0	0.328035	0	0	5.48932	0	0	0	0.136452	-0.0193645	0.702924	0	0.379244	0.511652	0	0.102465	0.202959	-0.0122683	27.654	78.3693	-0.984193	4.56625	-0.0317074	1.60648	0.0631591	0	2.11847	0.104653	20.2005	0.0104599	0.0496615
13	Tokyo	35	Non-ferrous metal products	0	0	0	0	2.91272	1.32947	0.0106393	0	0.0425708	0.586133	0	0.0049224	0.972333	0	0	0	0	0	0	0.109374	0.343602	0	0	0.564948	0.764328	0.00657696	0	0.0179449	0.231096	0	0	0	0	0.1347	4.07141	66.1825	7.97617	18.1221	20.4732	1.61779	0.0117521	11.8696	2.05879	10.9496	0.236744	1.80939
13	Tokyo	36	Metal products for construction and architecture	0.031795	0	0	0	0	0	0	0	0.00449421	0.0625162	0	0	0	0	0	0	0	0	0	0	0	0	0	0	0	0	0.0493677	0	0	0	0	0	0	0	0.00965887	4.56655	0.173497	0.258701	0	0.0360722	0	0	0	0	0	0.0040519
13	Tokyo	37	Other metal products	11.7491	0	10.3679	0	45.5896	117.976	0.0711094	2.48502	5.528	13.3546	2.27553	0.307064	0.988116	0	1.78114	0	2.26549	0.36173	0	12.5851	18.3203	0	0.853379	2.90087	78.2117	1.23083	10.2992	1.4126	5.06277	0	0.0252041	1.39259	0	0.714519	3.20312	132.377	55.8291	89.0935	169.684	6.89782	0.366555	38.0105	8.65869	3.07997	0.900509	4.59305
13	Tokyo	38	General industrial machinery	0.258499	0	0.946747	0	0	0	0	0	0	0.105889	0	0	0	0	0	0	0	0	0	0	0	0	0.0248605	5.61942	0	0	0	0.146748	0.584952	0	0	0.227339	0.0474722	0.0674414	0.251945	0.690522	0.71456	438.193	159.66	1.95515	0.144158	6.78009	1.71185	0.107194	0.323796	0.249815
13	Tokyo	39	Special industrial machinery	0	0	0	0	0	0	0	0	0	0	0	0	0	0	0	0	0	0	0	0	0	0	0	0	0	0	0	0	0	0	0	0	0	0	0	0	0	4.46597	702.385	0	0	0	0	0.164288	0	0
13	Tokyo	40	Other general machines	0	0	1.2982	0	0	0	0	0	0.0838672	1.86105	0	0	0	0	0	0	0	0	0	0.0295749	0	0	0	0.544126	0	0	0	0.494936	0.61968	0	0	0.27107	0	0	0.720983	1.28992	0.908816	32.2918	86.6018	21.2843	0.0270112	10.0483	2.92125	0.562382	0.212346	0.756132
13	Tokyo	41	Machinery for office and service industry	0	0	0	0	0	0	0	0	0	0	0	0	0	0	0	0	0	0	0	0	0	0	0	0	0	0	0	0	0	0	0	0	0	0	0	0	0	0	0	0	1.45662	0	0	0	0	0
13	Tokyo	42	Industrial electric equipment	0.632275	0	0.0315776	0	0	0	0	0	0.0312801	0.0621597	0	0	0	0	0	0	0	0	0	0	0	0	0	0.0276741	0	0	0	0	0	0	0	0	0	0	0	7.24726	0.190666	154.13	136.752	0.537998	0.272009	335.048	11.2376	4.1531	0.980085	4.14563
13	Tokyo	43	Applied electric equipment and electric mesuring instruments	0	0	0	0	0	0	0	0	0	0	0	0	0	0	0	0	0	0	0	0	0	0	0	0	0	0	0	0	0	0	0	0	0	0	0	0	0	3.53221	70.851	0.496655	0	69.0868	87.7181	0	0	0
13	Tokyo	44	Other electric equipment	0.354559	0	0.0177077	0	0.0177989	0	0	0	0	0.122	0	0	0	0	0	0	0	0	0	0.185568	0	0	0	0.0155187	0	0	0	0	0	0	0	0	0	0	0.0188492	0	0.409857	5.51973	20.0761	0.140789	0.0169482	9.23657	2.48431	13.6383	0.233163	1.50238
13	Tokyo	45	Household electric and electric applications	0	0	0	0	0	0	0	0	0	0	0	0	0	0	0	0	0	0	0	0	0	0	0	0	0	0	0	0	0	0	0	0	0	0	0	0	0	0	0	0	0	0	0	0	0.235746	0
13	Tokyo	46	Communication equipment	0.195868	0	0	0	0	0.0941472	0	0	0	0	0	0	0.0906006	0	0	0	0	0	0	0	1.2991	0	0	0	0.170328	0	0	0	0	0	0	0	0	0	0.104128	0.380522	0	1.02262	0.464819	0	0	0.087074	0.167366	0	0	5.94073
13	Tokyo	47	Electric computing equipment and accessory equipment	0	0	0	0	0	0	0	0	0	0	0	0	0	0	0	0	0	0	0	0	0	0	0	0	0	0	0	0	0	0	0	0	0	0	0	0	0	0	0.762238	0	0	0	0	0	0	0.03256
13	Tokyo	48	Semiconductor devices and integrated circuits	0	0	0	0	0	0	0	0	0	0	0	0	0	0	0	0	0	0	0	0	0	0	0	0	0	0	0	0	0	0	0	0	0	0	0	0	0.0795009	0.156412	2.81538	0.0448651	0.0567088	9.17678	12.1929	0.00655943	0.402468	4.00982
13	Tokyo	49	Other electrical equipment	0	0	0	0	0	0	0	0	0	0	0	0	1.7825	0	0	0	0	0	0	0	0.0198439	0	0	0	0	0	0	0	0	0	0	0	0	0	0.0668037	0.0203437	1.32627	3.55864	60.1779	0.118803	0.360397	42.3997	54.5819	0.0208433	2.02654	27.3142
13	Tokyo	50	Passenger motor cars	0	0	0	0	0	0	0	0	0	0	0	0	0	0	0	0	0	0	0	0	0	0	0	0	0	0	0	0	0	0	0	0	0	0	0	0	0	0	0	0	0	0	0	0	0	0
13	Tokyo	51	Other cars	0	0	0	0	0	0	0	0	0	0	0	0	0	0	0	0	0	0	0	0	0	0	0	0	0	0	0	0	0	0	0	0	0	0	0	0	0	0	0	0	0	0	0	0	0	0
13	Tokyo	52	Motor vheicle parts and accessories	0	0	0	0	0	0	0	0	0	0	0	0	0	0	0	0	0	0	0	0	0	0	0	0	0	0	0	0	0	0	0	0	0	0	0	0	0	0	0.0212289	0	0	0	0	0	0	0
13	Tokyo	53	Other transportation equipment	25.6935	0	0.0283896	0	0	0	0	0	0	0	0	0	0	0	0	0	0	0	0	0	0	0	0	0	0	0	0	0	0	0	0	0	0	0	0	0	0	0	0	0	0	0	0	0	0	0
13	Tokyo	54	Precision instruments	4.04801	0	0	0	0.119536	0	0	0	0	0	0.869655	0.190699	0	0	0	0	0	0	0	0.124626	0.338427	0	0	0.625333	0.207069	0	0	0.115867	0.124346	0	0	0	0	0	0	0.346952	0	39.7824	155.172	0	0	13.6555	1.93295	0	0	1.48692
13	Tokyo	55	Miscellaneous manufacturing products	8.89905	0	2.59134	0	2.05952	1.53699	0.0261085	21.9962	1.25361	3.08431	0.41315	0.21743	0.167444	0.0319979	0	0	0	0	0	0.0315767	0	0	0.17407	0.316884	0.104931	0.871544	0.0327871	0.998156	0.0630116	0	0	0.607776	0	0	2.34142	0.791173	0.0909683	1.00225	2.74899	0.0342243	0	0.268211	0.515533	0.0300223	0	0.215283
13	Tokyo	56	Reuse and recycling	7.0624	0	0	0	9.69664	20.7161	0.208971	0	0	0	133.541	0	0	26.6995	2.99102	0	0.752407	0	0	0.0631846	0	0.264107	0	94.4782	0.157475	7.49253	11.0875	4.46455	0.315214	0	11.7212	25.2497	6.11908	68.2847	16.0451	0	0.0606755	0	0	0	0	0	0	0	0	0
13	Tokyo	57	Building construction and repair of construction	0	0	0	0	0	0	0	0	0	0	0	0	0	0	0	0	0	0	0	0	0	0	0	0	0	0	0	0	0	0	0	0	0	0	0	0	0	0	0	0	0	0	0	0	0	0
13	Tokyo	58	Public construction	0	0	0	0	0	0	0	0	0	0	0	0	0	0	0	0	0	0	0	0	0	0	0	0	0	0	0	0	0	0	0	0	0	0	0	0	0	0	0	0	0	0	0	0	0	0
13	Tokyo	59	Other civil enginnering and construction	0	0	0	0	0	0	0	0	0	0	0	0	0	0	0	0	0	0	0	0	0	0	0	0	0	0	0	0	0	0	0	0	0	0	0	0	0	0	0	0	0	0	0	0	0	0
13	Tokyo	60	Electricity	0	0	0	0	0	0	0	0	0	0	0	0	0	0	0	0	0	0	0	0	0	0	0	0	0	0	0	0	0	0	0	0	0	0	0	0	0	0	0	0	0	0	0	0	0	0
13	Tokyo	61	Gas supply and heat supply	0	0	0	0	0	0	0	0	0	0	0	0	0	0	0	0	0	0	0	0	0	0	0	0	0	0	0	0	0	0	0	0	0	0	0	0	0	0	0	0	0	0	0	0	0	0
13	Tokyo	62	Water supply and waste management services	0	0	0	0	0	0	0	0	0	0	0	0	0	0	0	0	0	0	0	0	0	0	0	0	0	0	0	0	0	0	0	0	0	0	0	0	0	0	0	0	0	0	0	0	0	0
13	Tokyo	63	Commerce	667.997	0	16.1318	0	1014.27	169.044	22.7091	89.3448	51.4309	34.4681	181.331	5.54317	228.132	10.7968	7.79902	0	28.7586	1.15235	0	90.6829	20.2747	0.989682	23.3896	218.401	39.1433	12.8281	53.5944	2.33338	31.1362	0	18.1103	12.9773	29.3602	12.1331	36.1713	242.746	68.3012	263.759	559.074	36.1838	0.90823	196.124	35.9114	65.3283	3.48498	18.927
13	Tokyo	64	Financial and insurance	1355.69	0	242.827	0	395.084	223.201	67.2288	226.497	58.7834	42.6305	227.267	6.1525	314.135	27.525	15.685	0	48.9438	2.09381	0	167.443	32.5133	3.7348	6.50174	88.6209	43.35	36.1703	207.818	6.47957	54.56	0	28.5943	15.2324	21.4447	53.4482	33.7623	503.634	76.1928	193.821	512.096	95.4869	0.489632	201.879	16.3383	65.0736	2.08498	21.0165
13	Tokyo	65	Real estate agencies and rental services	0.813399	0	0.944733	0	3.3141	1.12746	0.261948	0.858201	0.177808	0.502114	1.39899	0.0605969	3.97245	0.130421	0.107401	0	0.332246	0.0267693	0	0.861329	0.681084	0	0.185561	2.21062	0.54284	0.121448	1.41862	0.0368182	0.47415	0	0.243718	0.263152	0.114638	0.197407	0.422367	4.71312	0.960226	2.26252	5.11753	0.955011	0	2.71621	0.290946	1.17662	0.0266564	0.143434
13	Tokyo	66	House rent	0	0	0	0	0	0	0	0	0	0	0	0	0	0	0	0	0	0	0	0	0	0	0	0	0	0	0	0	0	0	0	0	0	0	0	0	0	0	0	0	0	0	0	0	0	0
13	Tokyo	67	Transport	615.897	0.0224274	163.718	0	208.54	23.5638	6.18681	14.5588	19.7921	9.22379	65.3053	1.43121	41.0876	5.64372	3.10268	0	17.4202	0.21075	0	18.919	4.79121	2.04365	15.6791	17.1905	4.41496	6.73643	109.897	0.434795	7.35974	0	6.0179	6.89716	2.14816	5.31944	15.8919	90.4855	26.4759	54.401	102.709	11.036	0.116488	23.9782	2.03027	4.78999	0.553269	5.6703
13	Tokyo	68	Communication	0.0617453	0	0.0134727	0	0.0501056	0.0138309	0.00713394	0.0197239	0.00385542	0.00736682	0.0214833	0.000960179	0.0799982	0.00238451	0.00247536	0	0.00237754	0	0	0.0276099	0.084348	0	0.00415098	0.0335849	0.0179849	0.00481096	0.014497	0.000583398	0.0101739	0	0.00441348	0.00316324	0.00132108	0.00218959	0.0313912	0.203953	0.0263628	0.0786716	0.0947461	0.0147924	0	0.0736863	0.0140865	0.0140203	0.000844758	0.00962579
13	Tokyo	69	Broadcasting	0	0	0	0	0	0	0	0	0	0	0	0	0	0	0	0	0	0	0	0	0	0	0	0	0	0	0	0	0	0	0	0	0	0	0	0	0	0	0	0	0	0	0	0	0	0
13	Tokyo	70	Information services	381.807	0	4.50946	0	252.535	173.602	8.93105	27.4149	13.4009	30.4346	139.562	2.58254	155.726	21.2073	4.6605	0	29.964	1.21692	0	97.8893	100.219	0	7.44311	142.272	39.2593	22.0839	55.3772	3.76593	37.0471	0	17.8061	8.6627	16.3449	12.788	45.9444	216.136	101.133	304.886	888.321	68.7802	1.23315	441.538	121.241	198.337	1.21179	43.7254
13	Tokyo	71	﻿Internet based services	0.744324	0	0.371737	0	4.35927	1.19257	0.214734	1.62253	0.245489	0.609795	1.01941	0	6.77112	0.131586	0.128063	0	0.140574	0	0	1.29854	4.23151	0	0.143167	3.80081	0.647269	0.265488	0.943822	0	0.388688	0	0.114166	0.238037	0	0.129461	2.1104	10.2427	1.74577	3.29727	4.94584	0.703711	0	6.50755	1.16603	1.11116	0	0.663987
13	Tokyo	72	Image information production and distribution industry	29.874	0	11.0178	0	52.6041	9.72022	19.0933	49.5923	3.63799	7.68125	22.6604	1.10422	39.5421	36.5629	4.27006	0	5.20802	0	0	38.0059	25.2574	0	3.71287	37.4162	37.1693	8.3605	41.9604	1.78911	30.7205	0	3.80668	3.52754	2.5321	4.79631	6.35269	93.7529	42.0405	40.5741	68.9313	14.0785	0	124.225	11.3889	29.274	0.863542	18.4497
13	Tokyo	73	Public administration	0	0	0	0	0	0	0	0	0	0	0	0	0	0	0	0	0	0	0	0	0	0	0	0	0	0	0	0	0	0	0	0	0	0	0	0	0	0	0	0	0	0	0	0	0	0
13	Tokyo	74	Education and Research	2.17112	0	0.201981	0	17.1927	7.71432	0.598723	1.44418	0.157956	0.983522	10.7863	0.085233	0.945195	4.25593	2.47199	0	8.15254	0.692807	0	57.3281	31.9361	0.0931315	0.577275	26.7941	7.94077	6.79878	7.36841	0.621444	14.55	0	2.04703	1.76645	0.0117269	1.5105	7.88716	21.7409	2.5782	31.5003	199.223	0.845209	0.234016	88.3328	13.6047	23.3234	1.04982	6.94013
13	Tokyo	75	Medical service, health and social security and nursing care	0.00557999	0	0.00152323	0	0.0116918	0.00593064	0.000359956	0.00201153	0.000445803	0.000374804	0.00357587	5.55128e-05	0.00365519	0.000441153	0.000357783	0	0.000942568	3.26978e-05	0	0.00533298	0.00262712	0.000151643	0.000359983	0.00318563	0.0013864	0.000445034	0.00241084	6.74583e-05	0.000796342	0	0.000574123	0.000299263	0.000458269	0.000108507	0.000479056	0.00737289	0.00243867	0.00328999	0.0182592	0.00412867	3.31339e-05	0.0036978	0.000414611	0.000517394	3.25598e-05	0.000711104
13	Tokyo	76	Advertising and survery	28.146	0	23.0678	0	1049.19	1011.89	13.7415	57.2248	8.5689	46.4726	160.452	6.93567	62.4253	17.6068	10.0577	0	10.2225	0.680867	0	2767.53	269.42	0	1.24932	180.998	42.0484	8.88083	31.7679	4.21406	29.3958	0	11.955	6.23157	4.77128	13.1801	18.7998	250.269	33.7328	177.092	330.887	26.6102	1.03492	233.244	41.6256	42.7357	4.74596	36.6964
13	Tokyo	77	Giids rental and leasing services	163.239	0	23.3262	0	187.57	49.3452	13.8079	24.949	10.5237	11.5929	45.8113	1.2962	103.743	2.45255	2.86425	0	9.43222	0.436273	0	35.8199	6.79143	0	25.0829	113.345	43.2294	10.6387	90.9721	2.25017	97.0763	0	8.29865	5.98942	6.87881	3.6194	21.1423	142.844	82.7399	165.93	497.345	88.4018	0.442092	327.689	16.0032	35.4373	1.73773	26.8138
13	Tokyo	78	Other business services	360.726	0	59.8946	0	359.791	80.5428	10.5641	70.4253	22.1609	19.223	81.583	3.51148	369.016	12.3186	11.9887	0	42.434	1.00621	0	107.051	35.3692	0.518498	15.1806	197.307	49.8771	46.0303	140.52	1.72991	65.2249	0	11.0149	23.5346	5.09248	22.7551	43.5958	326.802	68.8507	178.749	414.863	45.846	0.67975	232.22	33.9221	53.0723	3.00588	32.3483
13	Tokyo	79	Personal services	0.346191	0	0.00617492	0	0.117928	0.0237718	0	0.0126336	0.00305837	0	0.0338668	0	0.048612	0	0	0	0.0035026	0	0	0.0226485	0.00585746	0	0	0.0324696	0.00806383	0	0.0100786	0	0.00322825	0	0	0	0	0.00645142	0.00657298	0.0510426	0.0124281	0.0381441	0.0586824	0.0070136	0	0.0714539	0.00528241	0.0184574	0	0.00275737
13	Tokyo	80	Activities not elsewhere classified	0	0	0	0	0	0	0	0	0	0	0	0	0	0	0	0	0	0	0	0	0	0	0	0	0	0	0	0	0	0	0	0	0	0	0	0	0	0	0	0	0	0	0	0	0	0
14	Kanagawa	1	Agriculture, forestry and fishery	76.6798	0	0.00139678	0	157.921	3.51132	0.566407	0.0045724	16.9991	0	0.172366	0	0	0.0074164	0.0101049	0	0.0190151	0	0	0.0219563	0.188145	0	0.017752	0	2.19737	0	0	0	0.00146047	0	0	0	0	0	0	0	0	0	0	0	0	0	0	0	0	0
14	Kanagawa	2	Metallic ores	0	0	0	0	0	0	0	0	0	0	0	0	0	0	0	0	0	0	0	0	0	0	0	0	0	0	0	0	0	0	0	0	0	0	0	0	0	0	0	0	0	0	0	0	0	0
14	Kanagawa	3	Non-metallic ores	0.00639353	0	0.00194363	0	0	0	0	0	0	0	0.0507619	0	0	0.0250629	0.0238179	0	0.00188998	0	0	0.000872929	0.00131694	-0.00121626	0.179652	0	0.00338426	0.0951846	1.06199	0.025159	0.203807	0	0	0.00133348	0	0.00551181	0.000886684	0.00189015	0.000558843	0	0	0.000630748	0	0	0	0	0	0
14	Kanagawa	4	Coal mining, crude petroleum and natural gas	0	0	0	0	0	0	0	0	0	0	0	0	0	0	0	0	0	0	0	0	0	0	0	0	0	0	0	0	0	0	0	0	0	0	0	0	0	0	0	0	0	0	0	0	0	0
14	Kanagawa	5	Food and Tobacco	835.216	0	0	0	1249.68	99.062	-0.019841	0.88077	0.090731	0	7.76556	0.0183594	0	0.07295	0.047331	0	0.441617	0	0	1.31981	11.1647	0	0	0.100339	0	0	0	0.0446202	0.383083	0	0	0	0	0	0	0	0	0	0	0	0	0	0	0	0	0
14	Kanagawa	6	Beverage	8.26675	0	0	0	12.1684	128.063	0	0	0	0	0	0	0	0	0	0	0	0	0	0	0.298708	0	0	0	0	0	0	0	0	0	0	0	0	0	0	0	0	0	0	0	0	0	0	0	0	0
14	Kanagawa	7	Textile products	3.52884	0	0	0	0.0303682	0.0484627	15.8031	63.7918	0.109736	0.773146	1.7675	0.0242237	0.307804	0.13903	0	0	0	0	0	0	0	0	0	0.344212	11.2227	0.0107887	0	0	0.0737107	0	0	0	0	0	0.160801	0.195875	0.0810775	0.057425	6.46979	0	0	0	0	0	0.0757753	0.00899416
14	Kanagawa	8	Wearing aparel and other textile products	16.2751	0	1.21043	0	6.52995	1.23869	0.0929323	4.43887	0.622278	0.301607	1.14846	0.614234	0.354769	0.390499	0.0316702	0	0.0695284	0	0	0.417472	0.828448	0	1.06217	0.241701	0.653623	0.262623	0.550179	0.134354	0.624802	0	0.155284	0.161884	0.0338042	0.0640319	0.42405	1.23672	0.678435	0.844545	1.49978	0.191432	0	2.95953	0.524292	0.152662	0.0288213	0.547351
14	Kanagawa	9	Timber and wooden products	0.683465	0	0.0120474	0	0.162468	0.025122	0	0.0115026	4.03662	1.43278	5.42087	0.00804938	0.0027895	0.00106612	0	0	0.00227788	0	0	0.00526044	0	0	0	0.0211162	0.00524422	0.036567	0.0065545	0.0567326	0.034641	0	0	0.0125358	0	0	0.0587766	0.214791	0.0616288	0.0028623	0.00763268	0.00228061	0	0.0134046	0.00257652	0	0	0.00179322
14	Kanagawa	10	Furniture and fixtures	0.729028	0	0.983064	0	4.53807	1.19143	0	1.19189	0.468867	13.5459	1.36456	0.233539	0.876769	0.115994	0.112888	0	0.330444	0.0687788	0	1.52623	2.52127	0	0.0420675	2.26553	2.53587	0	0.594274	0.390216	0.609121	0	0.268367	0.174859	0	0.0760803	0.891409	0.814382	0.512967	0.865048	5.15562	0.0827099	0	1.52324	0.77868	0.181387	0.0684886	1.43075
14	Kanagawa	11	Pulp, paper, paperboard, building paper	0.285217	0	0	0	0.594744	0.14764	0.113931	0.0681515	0.933452	0.862769	83.0811	31.4479	33.5507	0	-0.00452974	0	0	0.140751	0	2.82016	0.324293	0	0	0.921871	1.26684	0.652649	0	0.145191	0.0137484	0	0	0	0.00483496	0	0.0793132	0.0681974	0.0529285	0.00833062	0.00833051	0.0298694	0	0.335517	0.0149978	0.00873401	0.00824452	0.0900298
14	Kanagawa	12	Paper products	200.332	0	0	0	129.796	60.3713	0.747585	3.79197	0.411502	3.20804	4.76123	0.230587	2.48607	1.4931	0.198153	0	0.507526	0.0905459	0	25.35	29.2513	0	0.0369206	5.1249	3.33842	6.26457	0.0347711	3.58041	2.1718	0	0	0	0.599263	0	0.0680302	0.0932275	4.69501	0.212579	0.15184	0.326657	0	4.18128	0.820092	0.159195	0.210382	0.513696
14	Kanagawa	13	Publishing, printing	0.187281	0	0.0348032	0	20.5435	1.478	0.139472	0.868713	0.150829	0.278319	0.10737	0.265091	20.944	0.0508181	0.0584495	0	0.0246768	0.016436	0	2.52113	0.850109	0	0.0201056	0.133442	0.534032	0.428763	0.0757403	0.0296703	0.040939	0	0.0400821	0.0710358	0.00479907	0.022726	0.333421	0.48653	0.626049	0.582949	1.01291	0.108708	0.0041638	0.437582	0.275399	0.00433459	0.0572833	0.299167
14	Kanagawa	14	Chemical fertilizer	149.927	0	0	0	0	0.0188898	0	0	0	0	0	0	0	25.6157	1.15622	0	3.94113	0.0185381	0	0.37023	0.726107	0	0	0	0.0854371	0	0	0	0.0615665	0	0	0	0	0	0	0	0	0	0	0	0	0	0	0.0195558	0	0
14	Kanagawa	15	Basic inorganic chemical products	4.99273	0	0.0330267	0	39.5374	5.02218	0.71542	1.97308	0	0.0975182	35.0802	0.344239	0.0305885	19.7456	23.3128	0	19.0335	1.34134	0	63.1293	35.3388	0	0.114476	8.62532	50.0015	13.8692	0.467182	1.28712	0.656121	0	0.608578	0.190333	0.0364328	2.20836	1.05467	7.09806	1.09679	1.38102	3.54666	0.450148	0	1.91086	0.282531	0.559413	0.0310624	0.88487
14	Kanagawa	16	Basic organic chemical products	0	0	0	0	0.108069	0	0	0	0	0	0.294838	0	1.09536	12.1024	0	0	943.331	10.6627	0	16.6753	1.93777	0	0	0.0942246	2.43367	1.38214	0	0	0.224836	0	0	0.103269	0	0	0	0	0	0.510885	0	0	0	0	0	0	0	0
14	Kanagawa	17	Organic chemical products	0.604876	0	0.120837	0	104.455	103.156	3.87399	0.197782	1.31668	1.66505	59.2047	0.581304	3.80516	4.61955	18.7327	0	745.468	228.949	0	276.436	299.514	0	1.39614	189.137	1135.43	2.07119	0.394457	0.117732	69.3646	0	0	0	0	0	4.24469	0.470049	0.85122	0.114837	1.03352	0.274498	0	3.54949	0.826973	0.240796	0.454601	0.431672
14	Kanagawa	18	Synthetic resins	0	0	0	0	0	0	1.15192	0	0.0627097	1.68233	2.37258	0.456815	2.11078	0	0	0	0	0	0	37.3505	0	0	0	569.286	1.48809	0	0	0	1.8534	0	0	0	0	0	4.98666	0.184693	0.509659	0	0	0.503332	0	18.5957	0	1.19845	0.476329	1.01768
14	Kanagawa	19	Synthetic fibers	0	0	0	0	0.0031656	0	0.0432598	0.0183015	0	0.000168203	0.0024325	0	0	0	0	0	0	0	0	0	0	0	0.000169245	0.000492104	0.000212546	0	0	0	0.00464592	0	0	0	0	0	0	0	0	0	0	0	0	0	0	0	0	0
14	Kanagawa	20	Final chemical products	1322.35	0	16.7269	0	77.0474	25.7575	11.2166	7.61822	140.911	38.2232	60.7609	79.5339	313.074	5.2516	3.00645	0	16.3358	4.39616	0	299.821	82.5079	0.637128	38.8201	55.8322	94.8456	3.42799	22.7906	0.42514	26.3104	0	1.3401	3.63236	0.160452	0	8.05102	68.1783	52.8405	21.4255	100.906	3.30412	0.139212	30.8138	7.5901	9.27502	0.273601	6.36511
14	Kanagawa	21	Medicaments	52.1828	0	0	0	4.60586	0	0	0.0292972	0	0	0	0	0	0	0	0	0	0	0	1.2005	82.4511	0	0	0	0	0	0	0	0	0	0	0	0	0	0	0	0	0	0	0	0	0	0	0	0	0
14	Kanagawa	22	Petroleum refinery products	1529.64	0	42.1739	0	360.809	117.135	12.8483	17.9664	65.0493	4.16987	469.653	22.5426	52.0807	64.418	26.8684	0	36.7028	42.744	0	9.68684	36.5349	24.4629	328.409	31.3911	57.506	41.879	50.9195	5.06591	98.0605	0	27.3238	15.3524	7.86012	22.9366	14.7592	45.1335	24.8058	31.1122	41.5434	5.24953	0	7.19947	1.31793	6.9075	0	1.2039
14	Kanagawa	23	Coal products	0	0	0.0217553	0	0	0	0	0	0	0	0	0	0	0.369642	0.0449679	0	1.53019	0	0	0	0	0	0	0	0	0	0	0	1.035	0	1.61355	0.710465	0.0119995	0.079553	0.0463154	0.0634699	0	0.0103375	0.0310122	0	0	0	0	0	0	0
14	Kanagawa	24	Plastic products	133.846	0	0	0	169.218	100.283	0.901241	6.26254	6.43951	10.7126	7.94573	2.35291	105.417	3.35306	1.19013	0	0.927126	0.105258	0	38.0331	56.3094	0	0	565.419	201.513	3.93969	0.323366	0.180963	0.776823	0	0	0	0	0.232864	6.24762	10.1511	4.44853	3.98921	214.532	1.35016	0.106662	54.5253	3.11425	37.6044	1.57221	12.4409
14	Kanagawa	25	Rubber products	10.4431	0	1.68604	0	1.04291	0.142655	0.16054	2.00151	0.2753	0.474132	0.287916	0.282248	1.59589	0.275455	0.0382969	0	0.672614	0.0349996	0	0.563073	2.10904	0	0.321104	1.15286	156.191	0	0.221767	0	0.91052	0	1.14373	0.516087	0.0204387	0	0.236667	10.2163	0.932265	16.3402	54.0204	0.82073	0.124132	8.37801	1.39479	2.25219	0.261389	4.89792
14	Kanagawa	26	Glass and glass products	0.555633	0	0	0	20.8499	99.4851	0	0.283876	0	19.5284	0	0	0.0642533	0	0.645286	0	0.078703	0	0	10.3236	34.286	0	0	18.0573	5.85858	12.0397	0.452929	0	0.580306	0	0	0	0	0	4.50467	5.59966	1.88499	0.593371	0.593363	0	0.0663991	0.55577	0.296738	0.138245	0.195746	0.185873
14	Kanagawa	27	Cement and cement products	0.0238665	0	0	0	0	0	0	0	0	0	0	0	0	0	0	0	0	0	0	0	0	0	0.0183624	0	0	0	32.8487	0	0.0830876	0	0	0.0228977	0	0	0	0	0.0159935	0	0	0	0	0	0	0	0	0
14	Kanagawa	28	Pottery, china and earthenware	0	0	0	0	0.174976	0.00761542	0	0	0	0.171335	0	0	0	0	0.00817772	0	0	0	0	0	0	0	0	0.0277382	0	0	0.0430498	0.254409	0	0	0	0	0	0	0	0	0.0238885	0.0300792	0.0300788	0	0	0.88041	0	0.0157679	0	0.155468
14	Kanagawa	29	Other ceramic, stone and clay products	4.2189	0	0	0	0.564174	0	0	0	0.0353012	0.131532	1.14829	0	0.00825154	0.0378441	1.41798	0	0.0303216	0.0504893	0	0.121374	0.447915	0	1.24553	0.195198	0.209423	1.29802	6.0105	0.633663	2.89713	0	0.0820848	1.00977	0	3.98391	1.3846	2.37397	1.21934	9.75386	3.71691	0.44525	0	1.14197	0.350591	0.869934	0.0251381	0.135265
14	Kanagawa	30	Pig iron and crude steel	0	0	0	0	0	0	0	0	0	0	0	0	0	0	0	0	0	0	0	0	0	0	0	0	0	0	0	0	0	0	68.9428	1.81003	0.448619	0	0	-0.317504	-0.57065	-0.402815	-1.26286	-0.00650581	0	-0.0968716	0	-0.00570703	-0.00538719	-0.0102309
14	Kanagawa	31	steel products	1.78033	0	0.518671	0	0	0	0.0963033	0	0.146795	7.18339	0	0	0	0	0	0	0	0	0	0	0	0	0	3.31175	18.1589	0	23.3007	0	1.51075	0	202.516	16.5113	91.8321	0	0.591543	408.995	227.648	157.839	223.253	14.6437	0.0709177	60.6452	2.88407	9.26522	0.940801	2.05139
14	Kanagawa	32	Cast and forged steel products	0.331497	0	0.0236513	0	0	0	0	0	0	0.139671	0	0	0	0	0	0	0	0	0	0	0	0	0	0	0	0	0.0514711	0.161305	0.0989193	0	0	0.590647	0	0	0.453168	21.9655	3.45117	86.941	57.5852	11.4708	0.0226369	16.3158	1.51746	0.589134	0.0222447	0.0633681
14	Kanagawa	33	Other iron or steel products	0	0	0	0	0	0	0	0	0	7.07932	0	0	0	0	0	0	0	0	0	0.0514511	0	0	0	0.0645415	0	0	1.94995	0.0478353	0.641696	0	0	0.377262	0	0	0.705536	180.48	93.307	62.4066	38.3299	1.31048	0.0234955	8.47826	0	2.47038	0.577211	0.372706
14	Kanagawa	34	Non-ferrous metals	0	0	0	0	0	0	0.0389701	0	0	0.110666	0	0	-0.583172	0	5.08976	0	0.663297	0	0	11.0996	0	0	0	0.27591	-0.0391556	1.42134	0	0.766844	1.03458	0	0.207189	0.410391	-0.0248069	55.9173	158.465	-1.99007	9.23312	-0.0641134	3.24837	0.12771	0	4.28361	0.211611	40.846	0.0211502	0.100417
14	Kanagawa	35	Non-ferrous metal products	0	0	0	0	16.0111	7.30801	0.0584835	0	0.234009	3.22194	0	0.0270582	5.34486	0	0	0	0	0	0	0.601224	1.88876	0	0	3.10549	4.20147	0.0361532	0	0.0986421	1.27032	0	0	0	0	0.74044	22.3803	363.802	43.8446	99.6163	112.54	8.89292	0.0646008	65.2466	11.3171	60.1892	1.30137	9.94613
14	Kanagawa	36	Metal products for construction and architecture	0.0676082	0	0	0	0	0	0	0	0.00955638	0.132933	0	0	0	0	0	0	0	0	0	0	0	0	0	0	0	0	0.104974	0	0	0	0	0	0	0	0.0205384	9.7102	0.36892	0.550097	0	0.0767031	0	0	0	0	0	0.00861586
14	Kanagawa	37	Other metal products	19.414	0	17.1317	0	75.3317	194.943	0.117501	4.10622	9.13441	22.067	3.76006	0.50739	1.63275	0	2.94314	0	3.74347	0.597719	0	20.7954	30.2723	0	1.41011	4.79338	129.236	2.03381	17.0183	2.33417	8.36567	0	0.041647	2.30111	0	1.18066	5.29281	218.738	92.2515	147.217	280.383	11.3979	0.605691	62.8082	14.3075	5.08931	1.48799	7.58951
14	Kanagawa	38	General industrial machinery	0.596935	0	2.18626	0	0	0	0	0	0	0.244523	0	0	0	0	0	0	0	0	0	0	0	0	0.0574087	12.9766	0	0	0	0.338877	1.35079	0	0	0.524978	0.109624	0.155738	0.581799	1.59458	1.65009	1011.89	368.694	4.51491	0.332896	15.6568	3.95306	0.247536	0.747721	0.576881
14	Kanagawa	39	Special industrial machinery	0	0	0	0	0	0	0	0	0	0	0	0	0	0	0	0	0	0	0	0	0	0	0	0	0	0	0	0	0	0	0	0	0	0	0	0	0	11.4459	1800.16	0	0	0	0	0.421058	0	0
14	Kanagawa	40	Other general machines	0	0	1.96205	0	0	0	0	0	0.126754	2.81272	0	0	0	0	0	0	0	0	0	0.0446985	0	0	0	0.822372	0	0	0	0.748029	0.936561	0	0	0.409686	0	0	1.08967	1.94954	1.37355	48.8046	130.887	32.1684	0.0408237	15.1867	4.41507	0.849963	0.320931	1.14279
14	Kanagawa	41	Machinery for office and service industry	0	0	0	0	0	0	0	0	0	0	0	0	0	0	0	0	0	0	0	0	0	0	0	0	0	0	0	0	0	0	0	0	0	0	0	0	0	0	0	0	2.0206	0	0	0	0	0
14	Kanagawa	42	Industrial electric equipment	0.599653	0	0.0299484	0	0	0	0	0	0.0296662	0.0589527	0	0	0	0	0	0	0	0	0	0	0	0	0	0.0262463	0	0	0	0	0	0	0	0	0	0	0	6.87335	0.180829	146.178	129.697	0.51024	0.257975	317.762	10.6578	3.93882	0.929519	3.93174
14	Kanagawa	43	Applied electric equipment and electric mesuring instruments	0	0	0	0	0	0	0	0	0	0	0	0	0	0	0	0	0	0	0	0	0	0	0	0	0	0	0	0	0	0	0	0	0	0	0	0	0	2.65239	53.2031	0.372946	0	51.8783	65.8688	0	0	0
14	Kanagawa	44	Other electric equipment	1.4595	0	0.0728919	0	0.0732673	0	0	0	0	0.5022	0	0	0	0	0	0	0	0	0	0.763871	0	0	0	0.0638812	0	0	0	0	0	0	0	0	0	0	0.0775908	0	1.68714	22.7214	82.6411	0.579544	0.0697654	38.0214	10.2264	56.1406	0.959793	6.18438
14	Kanagawa	45	Household electric and electric applications	0	0	0	0	0	0	0	0	0	0	0	0	0	0	0	0	0	0	0	0	0	0	0	0	0	0	0	0	0	0	0	0	0	0	0	0	0	0	0	0	0	0	0	0	1.57038	0
14	Kanagawa	46	Communication equipment	0.19572	0	0	0	0	0.0940762	0	0	0	0	0	0	0.0905323	0	0	0	0	0	0	0	1.29812	0	0	0	0.1702	0	0	0	0	0	0	0	0	0	0.10405	0.380235	0	1.02184	0.464468	0	0	0.0870084	0.16724	0	0	5.93625
14	Kanagawa	47	Electric computing equipment and accessory equipment	0	0	0	0	0	0	0	0	0	0	0	0	0	0	0	0	0	0	0	0	0	0	0	0	0	0	0	0	0	0	0	0	0	0	0	0	0	0	0.343387	0	0	0	0	0	0	0.0146683
14	Kanagawa	48	Semiconductor devices and integrated circuits	0	0	0	0	0	0	0	0	0	0	0	0	0	0	0	0	0	0	0	0	0	0	0	0	0	0	0	0	0	0	0	0	0	0	0	0	0.189858	0.373531	6.72346	0.107143	0.135428	21.9153	29.1181	0.0156647	0.961142	9.57595
14	Kanagawa	49	Other electrical equipment	0	0	0	0	0	0	0	0	0	0	0	0	2.39	0	0	0	0	0	0	0	0.0266069	0	0	0	0	0	0	0	0	0	0	0	0	0	0.0895713	0.0272771	1.77828	4.77147	80.6873	0.159293	0.483225	56.85	73.1842	0.027947	2.71722	36.6233
14	Kanagawa	50	Passenger motor cars	0	0	0	0	0	0	0	0	0	0	0	0	0	0	0	0	0	0	0	0	0	0	0	0	0	0	0	0	0	0	0	0	0	0	0	0	0	0	0	0	0	0	0	0	0	0
14	Kanagawa	51	Other cars	0	0	0	0	0	0	0	0	0	0	0	0	0	0	0	0	0	0	0	0	0	0	0	0	0	0	0	0	0	0	0	0	0	0	0	0	0	0	0	0	0	0	0	0	0	0
14	Kanagawa	52	Motor vheicle parts and accessories	0	0	0	0	0	0	0	0	0	0	0	0	0	0	0	0	0	0	0	0	0	0	0	0	0	0	0	0	0	0	0	0	0	0	0	0	0	0	0.0371311	0	0	0	0	0	0	0
14	Kanagawa	53	Other transportation equipment	78.6002	0	0.0868479	0	0	0	0	0	0	0	0	0	0	0	0	0	0	0	0	0	0	0	0	0	0	0	0	0	0	0	0	0	0	0	0	0	0	0	0	0	0	0	0	0	0	0
14	Kanagawa	54	Precision instruments	2.0262	0	0	0	0.0598328	0	0	0	0	0	0.4353	0.0954529	0	0	0	0	0	0	0	0.0623805	0.169397	0	0	0.313006	0.103647	0	0	0.0579965	0.0622405	0	0	0	0	0	0	0.173665	0	19.9128	77.6703	0	0	6.83516	0.967525	0	0	0.744268
14	Kanagawa	55	Miscellaneous manufacturing products	11.5232	0	3.35548	0	2.66684	1.99023	0.0338075	28.4825	1.62328	3.99383	0.534982	0.281547	0.216821	0.0414337	0	0	0	0	0	0.0408882	0	0	0.225401	0.410329	0.135874	1.12855	0.0424555	1.2925	0.0815928	0	0	0.787001	0	0	3.03187	1.02448	0.117793	1.2978	3.55963	0.0443166	0	0.347302	0.667556	0.0388754	0	0.278766
14	Kanagawa	56	Reuse and recycling	0.189952	0	0	0	0.260803	0.557185	0.00562053	0	0	0	3.59175	0	0	0.718114	0.0804471	0	0.0202369	0	0	0.00169943	0	0.00710348	0	2.5411	0.00423546	0.20152	0.298212	0.120079	0.00847806	0	0.315257	0.67912	0.16458	1.8366	0.431551	0	0.00163194	0	0	0	0	0	0	0	0	0
14	Kanagawa	57	Building construction and repair of construction	0	0	0	0	0	0	0	0	0	0	0	0	0	0	0	0	0	0	0	0	0	0	0	0	0	0	0	0	0	0	0	0	0	0	0	0	0	0	0	0	0	0	0	0	0	0
14	Kanagawa	58	Public construction	0	0	0	0	0	0	0	0	0	0	0	0	0	0	0	0	0	0	0	0	0	0	0	0	0	0	0	0	0	0	0	0	0	0	0	0	0	0	0	0	0	0	0	0	0	0
14	Kanagawa	59	Other civil enginnering and construction	0	0	0	0	0	0	0	0	0	0	0	0	0	0	0	0	0	0	0	0	0	0	0	0	0	0	0	0	0	0	0	0	0	0	0	0	0	0	0	0	0	0	0	0	0	0
14	Kanagawa	60	Electricity	15.3216	0	1.77509	0	17.254	2.99201	1.8249	1.63331	3.28861	0.391919	10.9328	0.78854	4.04346	1.30423	1.95354	0	3.59757	0.792982	0	1.47811	3.17197	0.189135	0.626362	10.8392	3.11167	0.894268	1.32074	0.144902	3.43617	0	6.28107	2.80631	0.402217	0.27568	1.24096	5.47267	3.77545	3.51068	8.6854	1.02989	0.00459176	2.60495	0.471973	2.74378	0.0406099	0.209946
14	Kanagawa	61	Gas supply and heat supply	0.755302	0	0.25148	0	221.937	51.5529	2.83272	1.64646	1.24555	0.742548	184.131	3.02445	1.86332	15.7562	2.59903	0	6.56177	48.6927	0	3.95308	47.4717	0	1.16223	39.2299	31.0893	30.1732	2.73641	2.45018	5.52189	0	45.8764	13.0436	0.554832	0.525482	8.29844	31.3037	21.5112	18.6415	22.2261	3.142	0	16.1171	1.72105	15.034	0	0.224593
14	Kanagawa	62	Water supply and waste management services	0.169816	0	0.0392459	0	0.460673	0.154927	0.0138328	0.00871002	0.0164729	0.0032735	0.249905	0.0058666	0.0511345	0.0452084	0.0226863	0	0.074708	0.0169634	0	0.10735	0.0845522	0	0.00461128	0.0635422	0.0573319	0.00855113	0.125218	0.00324046	0.041731	0	0.0263531	0.0115004	0.00733787	0.00416982	0.0205339	0.0905634	0.03347	0.0518368	0.208609	0.0400431	0	0.048552	0.00512136	0.0324756	0.000625623	0.0035644
14	Kanagawa	63	Commerce	23.495	0	0.567393	0	35.6743	5.94567	0.79873	3.14246	1.80894	1.21232	6.37781	0.194966	8.02391	0.379748	0.274309	0	1.01151	0.0405309	0	3.18952	0.713107	0.0348094	0.822664	7.68166	1.37676	0.451192	1.88504	0.0820703	1.09513	0	0.636981	0.456443	1.03266	0.42675	1.27223	8.53792	2.40231	9.27701	19.6639	1.27267	0.0319445	6.89812	1.26308	2.29774	0.122575	0.665706
14	Kanagawa	64	Financial and insurance	0	0	0	0	0	0	0	0	0	0	0	0	0	0	0	0	0	0	0	0	0	0	0	0	0	0	0	0	0	0	0	0	0	0	0	0	0	0	0	0	0	0	0	0	0	0
14	Kanagawa	65	Real estate agencies and rental services	0.0863247	0	0.100263	0	0.35172	0.119655	0.0278001	0.0910794	0.0188704	0.0532885	0.148473	0.00643105	0.42159	0.0138414	0.0113983	0	0.0352608	0.00284098	0	0.0914114	0.0722823	0	0.0196933	0.234609	0.0576107	0.0128891	0.150556	0.00390746	0.0503207	0	0.0258654	0.0279278	0.0121664	0.0209505	0.0448251	0.500196	0.101907	0.240117	0.543115	0.101354	0	0.288266	0.0308776	0.124873	0.00282899	0.0152224
14	Kanagawa	66	House rent	0	0	0	0	0	0	0	0	0	0	0	0	0	0	0	0	0	0	0	0	0	0	0	0	0	0	0	0	0	0	0	0	0	0	0	0	0	0	0	0	0	0	0	0	0	0
14	Kanagawa	67	Transport	127.256	0.00463395	33.8273	0	43.0885	4.86874	1.27832	3.00813	4.08944	1.90582	13.4934	0.295715	8.4895	1.1661	0.641076	0	3.59936	0.0435451	0	3.90904	0.989958	0.422258	3.23962	3.55189	0.912217	1.39188	22.707	0.0898373	1.52067	0	1.24342	1.42509	0.443852	1.0991	3.28359	18.6961	5.47045	11.2403	21.2217	2.28026	0.0240687	4.95437	0.419495	0.989707	0.114316	1.17159
14	Kanagawa	68	Communication	0.366486	0	0.0799662	0	0.297399	0.0820928	0.0423431	0.11707	0.0228837	0.0437254	0.127513	0.00569909	0.474825	0.0141531	0.0146924	0	0.0141118	0	0	0.163877	0.500643	0	0.0246379	0.199341	0.106748	0.0285552	0.0860462	0.00346273	0.0603869	0	0.026196	0.0187752	0.00784118	0.0129962	0.186321	1.21055	0.156475	0.466951	0.56236	0.0877996	0	0.437361	0.0836099	0.0832166	0.00501401	0.0571334
14	Kanagawa	69	Broadcasting	0	0	0	0	0	0	0	0	0	0	0	0	0	0	0	0	0	0	0	0	0	0	0	0	0	0	0	0	0	0	0	0	0	0	0	0	0	0	0	0	0	0	0	0	0	0
14	Kanagawa	70	Information services	45.9797	0	0.543059	0	30.412	20.9063	1.07554	3.30148	1.61382	3.66513	16.8069	0.311007	18.7535	2.55392	0.561248	0	3.60846	0.14655	0	11.7885	12.069	0	0.896349	17.1334	4.72787	2.65949	6.66889	0.453518	4.46146	0	2.14433	1.04322	1.96836	1.54002	5.53292	26.0286	12.1791	36.7164	106.978	8.28297	0.148504	53.1729	14.6007	23.885	0.145932	5.2657
14	Kanagawa	71	﻿Internet based services	0.0341969	0	0.0170789	0	0.200281	0.0547911	0.00986566	0.0745447	0.0112787	0.0280162	0.0468353	0	0.31109	0.00604556	0.00588366	0	0.00645847	0	0	0.0596596	0.194411	0	0.00657761	0.174623	0.0297379	0.0121975	0.0433626	0	0.0178577	0	0.00524518	0.0109363	0	0.0059479	0.0969596	0.470588	0.0802068	0.151489	0.22723	0.032331	0	0.29898	0.0535714	0.0510506	0	0.0305059
14	Kanagawa	72	Image information production and distribution industry	0.0674285	0	0.0248683	0	0.118733	0.0219395	0.0430955	0.111935	0.00821131	0.0173374	0.0511469	0.00249234	0.0892506	0.0825262	0.00963795	0	0.011755	0	0	0.0857832	0.0570086	0	0.00838032	0.0844522	0.083895	0.0188705	0.094709	0.00403821	0.0693393	0	0.00859207	0.00796202	0.00571521	0.0108258	0.0143387	0.21161	0.0948897	0.0915798	0.155585	0.0317766	0	0.280388	0.0257059	0.0660743	0.0019491	0.0416428
14	Kanagawa	73	Public administration	0	0	0	0	0	0	0	0	0	0	0	0	0	0	0	0	0	0	0	0	0	0	0	0	0	0	0	0	0	0	0	0	0	0	0	0	0	0	0	0	0	0	0	0	0	0
14	Kanagawa	74	Education and Research	4.0468	0	0.376477	0	32.0459	14.3789	1.11598	2.69185	0.294418	1.83321	20.1048	0.158868	1.76177	7.93274	4.60761	0	15.1957	1.29134	0	106.855	59.5266	0.17359	1.076	49.9422	14.801	12.6724	13.7342	1.15833	27.12	0	3.81551	3.29253	0.0218581	2.81545	14.7011	40.5235	4.80558	58.7143	371.337	1.57541	0.436188	164.646	25.3582	43.4731	1.95679	12.9359
14	Kanagawa	75	Medical service, health and social security and nursing care	0.225205	0	0.0614765	0	0.471875	0.239357	0.0145276	0.0811842	0.0179923	0.0151269	0.14432	0.00224046	0.147521	0.0178047	0.0144399	0	0.0380415	0.00131966	0	0.215236	0.106029	0.00612021	0.0145287	0.12857	0.0559542	0.0179613	0.0973002	0.00272258	0.0321399	0	0.0231713	0.0120781	0.0184955	0.00437927	0.0193344	0.297566	0.0984232	0.132782	0.736929	0.166631	0.00133726	0.149241	0.0167334	0.0208817	0.0013141	0.0286997
14	Kanagawa	76	Advertising and survery	0.238477	0	0.19545	0	8.88967	8.57358	0.11643	0.484858	0.0726031	0.393756	1.35949	0.058765	0.528921	0.14918	0.0852173	0	0.0866135	0.0057689	0	23.4489	2.28276	0	0.0105854	1.53357	0.35627	0.075246	0.269165	0.0357052	0.249067	0	0.101293	0.0527992	0.0404264	0.111673	0.159288	2.12049	0.285813	1.50047	2.80356	0.225465	0.00876875	1.97625	0.352688	0.362094	0.0402119	0.310924
14	Kanagawa	77	Giids rental and leasing services	5.09784	0	0.728462	0	5.85771	1.54102	0.431212	0.779141	0.328648	0.362039	1.43066	0.0404795	3.23982	0.0765917	0.0894488	0	0.294563	0.0136246	0	1.11863	0.212092	0	0.783324	3.53971	1.35003	0.332241	2.841	0.0702715	3.03163	0	0.259162	0.187046	0.214821	0.113032	0.66026	4.46092	2.58392	5.18191	15.5318	2.76073	0.0138063	10.2335	0.499771	1.10669	0.0542682	0.837379
14	Kanagawa	78	Other business services	45.8611	0	7.61472	0	45.7421	10.2398	1.34307	8.95354	2.81743	2.44392	10.3721	0.446434	46.915	1.56612	1.52418	0	5.39486	0.127924	0	13.6099	4.49668	0.0659194	1.92999	25.0846	6.34114	5.85208	17.8651	0.219932	8.29239	0	1.40038	2.99208	0.647435	2.89298	5.54257	41.5481	8.75336	22.7253	52.7437	5.82864	0.0864203	29.5234	4.3127	6.74737	0.382153	4.11262
14	Kanagawa	79	Personal services	0.867249	0	0.0154689	0	0.295423	0.0595511	0	0.0316488	0.00766157	0	0.0848403	0	0.121779	0	0	0	0.00877444	0	0	0.0567373	0.0146736	0	0	0.0813401	0.0202009	0	0.0252481	0	0.00808714	0	0	0	0	0.0161616	0.0164661	0.127868	0.0311339	0.0955554	0.147006	0.0175699	0	0.179	0.0132331	0.046238	0	0.00690754
14	Kanagawa	80	Activities not elsewhere classified	0	0	0	0	0	0	0	0	0	0	0	0	0	0	0	0	0	0	0	0	0	0	0	0	0	0	0	0	0	0	0	0	0	0	0	0	0	0	0	0	0	0	0	0	0	0
15	Niigata	1	Agriculture, forestry and fishery	331.638	0	0.00604103	0	683.007	15.1864	2.4497	0.0197755	73.5207	0	0.74548	0	0	0.0320758	0.0437036	0	0.0822398	0	0	0.0949605	0.813724	0	0.0767771	0	9.50359	0	0	0	0.0063165	0	0	0	0	0	0	0	0	0	0	0	0	0	0	0	0	0
15	Niigata	2	Metallic ores	0	0	0	0	0	0	0	0	0	0	0	0	0	0	0	0	0	0	0	0	0	0	0	0	0	0	0	0	0	0	0	0	0	0	0	0	0	0	0	0	0	0	0	0	0	0
15	Niigata	3	Non-metallic ores	0.0328667	0	0.00999149	0	0	0	0	0	0	0	0.260948	0	0	0.128839	0.122439	0	0.00971568	0	0	0.0044874	0.00676987	-0.00625233	0.923525	0	0.0173972	0.489308	5.45928	0.129333	1.04769	0	0	0.0068549	0	0.0283341	0.00455811	0.00971656	0.0028728	0	0	0.00324244	0	0	0	0	0	0
15	Niigata	4	Coal mining, crude petroleum and natural gas	0	0	0	0	0.000333012	0	0	0	0	0	0.23319	0	0	0.149525	0.000342402	0	0.0289407	0.000938765	0	0.000694384	0.000314273	0.786571	0	0	0	0.0149066	0.00360501	0.00548746	0.0228632	0	0.0286931	0	0	0.00103842	0	0.000644378	0	0	0.00157425	0	0	0.00117961	0	0	0	0
15	Niigata	5	Food and Tobacco	438.033	0	0	0	655.401	51.9536	-0.0104057	0.461924	0.0475844	0	4.07269	0.0096287	0	0.038259	0.024823	0	0.231609	0	0	0.692181	5.85541	0	0	0.0526235	0	0	0	0.0234013	0.20091	0	0	0	0	0	0	0	0	0	0	0	0	0	0	0	0	0
15	Niigata	6	Beverage	1.13787	0	0	0	1.67492	17.6272	0	0	0	0	0	0	0	0	0	0	0	0	0	0	0.0411156	0	0	0	0	0	0	0	0	0	0	0	0	0	0	0	0	0	0	0	0	0	0	0	0	0
15	Niigata	7	Textile products	10.2761	0	0	0	0.0884333	0.141125	46.0191	185.764	0.319554	2.25143	5.14702	0.0705401	0.896336	0.404858	0	0	0	0	0	0	0	0	0	1.00236	32.6808	0.0314169	0	0	0.214648	0	0	0	0	0	0.468259	0.570395	0.2361	0.167223	18.8402	0	0	0	0	0	0.22066	0.0261913
15	Niigata	8	Wearing aparel and other textile products	35.7135	0	2.65612	0	14.329	2.71813	0.203927	9.74048	1.3655	0.661835	2.52014	1.34785	0.778492	0.856896	0.0694958	0	0.15257	0	0	0.916082	1.81791	0	2.33077	0.530379	1.43428	0.576289	1.20729	0.29482	1.37104	0	0.340749	0.355232	0.0741785	0.140509	0.930518	2.71382	1.48873	1.85324	3.29105	0.420071	0	6.49428	1.15049	0.334995	0.0632442	1.20109
15	Niigata	9	Timber and wooden products	5.28614	0	0.0931783	0	1.25658	0.194302	0	0.0889648	31.2206	11.0816	41.9268	0.0622565	0.0215749	0.00824575	0	0	0.0176179	0	0	0.0406859	0	0	0	0.16332	0.0405605	0.282821	0.0506947	0.438789	0.267925	0	0	0.0969563	0	0	0.454598	1.66126	0.476658	0.0221379	0.0590337	0.017639	0	0.103675	0.0199276	0	0	0.0138694
15	Niigata	10	Furniture and fixtures	0.271611	0	0.366256	0	1.69073	0.443885	0	0.444057	0.174684	5.04676	0.508389	0.0870088	0.326654	0.0432155	0.0420582	0	0.123112	0.0256247	0	0.56862	0.939339	0	0.0156729	0.844061	0.944779	0	0.221406	0.145381	0.226938	0	0.0999845	0.0651464	0	0.0283449	0.332109	0.303411	0.191114	0.322288	1.92081	0.0308149	0	0.567506	0.29011	0.0675787	0.0255166	0.53305
15	Niigata	11	Pulp, paper, paperboard, building paper	1.03998	0	0	0	2.1686	0.538334	0.415424	0.248499	3.40361	3.14589	302.936	114.667	122.335	0	-0.0165166	0	0	0.513215	0	10.2831	1.18246	0	0	3.36139	4.61924	2.37973	0	0.529403	0.0501303	0	0	0	0.0176296	0	0.289197	0.248666	0.192991	0.0303757	0.0303753	0.108912	0	1.22339	0.0546858	0.0318465	0.0300617	0.328273
15	Niigata	12	Paper products	36.6528	0	0	0	23.7475	11.0456	0.136779	0.693782	0.0752887	0.586946	0.871118	0.0421883	0.454853	0.273179	0.0362541	0	0.0928573	0.0165663	0	4.63805	5.35185	0	0.00675502	0.937655	0.610799	1.14617	0.00636174	0.655074	0.397354	0	0	0	0.109642	0	0.0124469	0.017057	0.859002	0.0388937	0.0277808	0.0597655	0	0.76501	0.150045	0.0291264	0.0384917	0.0939863
15	Niigata	13	Publishing, printing	0.0370579	0	0.00688663	0	4.065	0.292457	0.0275978	0.171895	0.0298451	0.0550718	0.0212457	0.0524544	4.14426	0.0100555	0.0115656	0	0.00488288	0.00325225	0	0.498865	0.168214	0	0.00397837	0.0264045	0.105671	0.0848407	0.014987	0.00587096	0.00810074	0	0.00793118	0.0140561	0.000949608	0.00449687	0.0659751	0.0962713	0.123878	0.11535	0.200428	0.0215104	0.000823906	0.0865857	0.0544941	0.000857699	0.0113348	0.0591972
15	Niigata	14	Chemical fertilizer	148.956	0	0	0	0	0.0187675	0	0	0	0	0	0	0	25.4499	1.14873	0	3.91561	0.0184181	0	0.367833	0.721405	0	0	0	0.0848839	0	0	0	0.0611679	0	0	0	0	0	0	0	0	0	0	0	0	0	0	0.0194292	0	0
15	Niigata	15	Basic inorganic chemical products	4.59955	0	0.0304258	0	36.4238	4.62668	0.65908	1.8177	0	0.0898386	32.3176	0.31713	0.0281797	18.1906	21.4769	0	17.5346	1.23571	0	58.1578	32.5558	0	0.105461	7.94607	46.0639	12.777	0.430391	1.18576	0.604451	0	0.560652	0.175345	0.0335637	2.03445	0.971616	6.53908	1.01041	1.27226	3.26736	0.414699	0	1.76038	0.260281	0.515358	0.0286162	0.815186
15	Niigata	16	Basic organic chemical products	0	0	0	0	0.0297951	0	0	0	0	0	0.0812879	0	0.301995	3.33669	0	0	260.08	2.93975	0	4.59744	0.534251	0	0	0.0259781	0.670974	0.381061	0	0	0.0619882	0	0	0.0284717	0	0	0	0	0	0.140853	0	0	0	0	0	0	0	0
15	Niigata	17	Organic chemical products	0.0819574	0	0.0163728	0	14.1531	13.9771	0.524904	0.0267984	0.178403	0.225606	8.02192	0.0787635	0.515578	0.625923	2.53817	0	101.007	31.0213	0	37.4556	40.5826	0	0.189169	25.627	153.845	0.280635	0.0534467	0.015952	9.39853	0	0	0	0	0	0.575132	0.063689	0.115336	0.0155598	0.140036	0.037193	0	0.480936	0.11205	0.0326265	0.061596	0.0584892
15	Niigata	18	Synthetic resins	0	0	0	0	0	0	0.191612	0	0.0104312	0.27984	0.394659	0.0759872	0.35111	0	0	0	0	0	0	6.21292	0	0	0	94.6957	0.247531	0	0	0	0.308297	0	0	0	0	0	0.829487	0.0307221	0.0847773	0	0	0.0837248	0	3.09323	0	0.199351	0.0792332	0.169283
15	Niigata	19	Synthetic fibers	0	0	0	0	0.14507	0	1.98247	0.838707	0	0.00770824	0.111474	0	0	0	0	0	0	0	0	0	0	0	0.00775599	0.0225517	0.00974039	0	0	0	0.212909	0	0	0	0	0	0	0	0	0	0	0	0	0	0	0	0	0
15	Niigata	20	Final chemical products	56.3673	0	0.713009	0	3.28427	1.09796	0.478127	0.324739	6.00654	1.62933	2.59003	3.39026	13.3453	0.223858	0.128155	0	0.696341	0.187393	0	12.7803	3.51703	0.0271586	1.65477	2.37994	4.04295	0.146123	0.971488	0.0181223	1.12152	0	0.057124	0.154835	0.00683951	0	0.343188	2.90621	2.25241	0.913296	4.30127	0.140844	0.00593415	1.31349	0.32354	0.395363	0.0116627	0.271323
15	Niigata	21	Medicaments	1.3328	0	0	0	0.117638	0	0	0.000748282	0	0	0	0	0	0	0	0	0	0	0	0.0306619	2.10589	0	0	0	0	0	0	0	0	0	0	0	0	0	0	0	0	0	0	0	0	0	0	0	0	0
15	Niigata	22	Petroleum refinery products	10.2146	0	0.281629	0	2.40941	0.782205	0.0857987	0.119976	0.434386	0.0278456	3.13625	0.150535	0.347785	0.430171	0.179422	0	0.245094	0.285436	0	0.0646868	0.243973	0.163358	2.19305	0.209624	0.384014	0.27966	0.34003	0.0338292	0.654829	0	0.182463	0.102521	0.0524884	0.153166	0.0985593	0.301393	0.165648	0.207761	0.277419	0.0350554	0	0.0480766	0.00880085	0.0461269	0	0.00803943
15	Niigata	23	Coal products	0	0	0.00507372	0	0	0	0	0	0	0	0	0	0	0.0862071	0.0104873	0	0.356868	0	0	0	0	0	0	0	0	0	0	0	0.241381	0	0.376308	0.165693	0.00279849	0.0185532	0.0108016	0.0148023	0	0.0024109	0.00723259	0	0	0	0	0	0	0
15	Niigata	24	Plastic products	52.6116	0	0	0	66.5158	39.4191	0.354257	2.46166	2.53122	4.21086	3.12328	0.924874	41.4368	1.31801	0.467814	0	0.364432	0.0413744	0	14.9499	22.1339	0	0	222.253	79.2101	1.5486	0.127108	0.0711325	0.305351	0	0	0	0	0.0915333	2.4558	3.99018	1.74861	1.56807	84.3275	0.530717	0.0419262	21.4326	1.22414	14.7814	0.617998	4.89022
15	Niigata	25	Rubber products	1.8585	0	0.300054	0	0.1856	0.0253874	0.0285703	0.356196	0.0489935	0.0843784	0.0512388	0.0502301	0.284011	0.0490211	0.00681548	0	0.119701	0.00622867	0	0.100207	0.375334	0	0.057145	0.205169	27.7963	0	0.0394665	0	0.16204	0	0.203542	0.091845	0.00363736	0	0.0421183	1.81813	0.16591	2.90796	9.61369	0.14606	0.0220911	1.49099	0.248223	0.400808	0.0465179	0.871653
15	Niigata	26	Glass and glass products	0.00956667	0	0	0	0.358986	1.7129	0	0.00488767	0	0.336233	0	0	0.00110629	0	0.0111103	0	0.00135508	0	0	0.177748	0.590324	0	0	0.310903	0.100871	0.207295	0.00779836	0	0.00999148	0	0	0	0	0	0.0775596	0.0964129	0.032455	0.0102164	0.0102163	0	0.00114324	0.00956904	0.00510911	0.00238025	0.00337028	0.00320029
15	Niigata	27	Cement and cement products	0.0184988	0	0	0	0	0	0	0	0	0	0	0	0	0	0	0	0	0	0	0	0	0	0.0142326	0	0	0	25.4608	0	0.0644007	0	0	0.0177478	0	0	0	0	0.0123965	0	0	0	0	0	0	0	0	0
15	Niigata	28	Pottery, china and earthenware	0	0	0	0	0.171025	0.00744348	0	0	0	0.167467	0	0	0	0	0.00799308	0	0	0	0	0	0	0	0	0.0271119	0	0	0.0420779	0.248665	0	0	0	0	0	0	0	0	0.0233491	0.0294001	0.0293997	0	0	0.860533	0	0.0154118	0	0.151958
15	Niigata	29	Other ceramic, stone and clay products	4.39857	0	0	0	0.588201	0	0	0	0.0368046	0.137134	1.19719	0	0.00860296	0.0394558	1.47837	0	0.031613	0.0526396	0	0.126543	0.46699	0	1.29858	0.203511	0.218342	1.3533	6.26648	0.660649	3.02051	0	0.0855806	1.05277	0	4.15357	1.44357	2.47507	1.27127	10.1693	3.87521	0.464212	0	1.19061	0.365521	0.906982	0.0262087	0.141025
15	Niigata	30	Pig iron and crude steel	0	0	0	0	0	0	0	0	0	0	0	0	0	0	0	0	0	0	0	0	0	0	0	0	0	0	0	0	0	0	214.182	5.62316	1.39371	0	0	-0.986377	-1.77282	-1.25141	-3.92329	-0.0202113	0	-0.300947	0	-0.0177298	-0.0167362	-0.031784
15	Niigata	31	steel products	0.215692	0	0.0628384	0	0	0	0.0116674	0	0.0177847	0.870288	0	0	0	0	0	0	0	0	0	0	0	0	0	0.401228	2.20001	0	2.82295	0	0.183032	0	24.5354	2.00039	11.1257	0	0.0716671	49.5509	27.5802	19.1227	27.0478	1.77413	0.00859188	7.34734	0.349413	1.12251	0.113981	0.248532
15	Niigata	32	Cast and forged steel products	0.396842	0	0.0283135	0	0	0	0	0	0	0.167203	0	0	0	0	0	0	0	0	0	0	0	0	0	0	0	0	0.061617	0.193101	0.118418	0	0	0.707075	0	0	0.542496	26.2953	4.13147	104.079	68.9364	13.7319	0.027099	19.532	1.81658	0.705263	0.0266295	0.0758591
15	Niigata	33	Other iron or steel products	0	0	0	0	0	0	0	0	0	2.86081	0	0	0	0	0	0	0	0	0	0.0207918	0	0	0	0.0260817	0	0	0.787992	0.0193306	0.259315	0	0	0.152455	0	0	0.285113	72.9333	37.7061	25.219	15.4894	0.529577	0.00949473	3.42613	0	0.998301	0.233256	0.150614
15	Niigata	34	Non-ferrous metals	0	0	0	0	0	0	0.0201106	0	0	0.0571095	0	0	-0.300947	0	2.62658	0	0.342296	0	0	5.72797	0	0	0	0.142384	-0.0202063	0.733484	0	0.395732	0.533896	0	0.10692	0.211783	-0.0128017	28.8562	81.7764	-1.02698	4.76477	-0.0330859	1.67633	0.065905	0	2.21057	0.109202	21.0787	0.0109146	0.0518206
15	Niigata	35	Non-ferrous metal products	0	0	0	0	2.79626	1.27631	0.0102139	0	0.0408686	0.562698	0	0.00472558	0.933455	0	0	0	0	0	0	0.105001	0.329863	0	0	0.542359	0.733768	0.00631399	0	0.0172274	0.221856	0	0	0	0	0.129314	3.90862	63.5363	7.65726	17.3975	19.6546	1.55311	0.0112822	11.395	1.97647	10.5118	0.227278	1.73705
15	Niigata	36	Metal products for construction and architecture	0.0604949	0	0	0	0	0	0	0	0.00855092	0.118947	0	0	0	0	0	0	0	0	0	0	0	0	0	0	0	0	0.0939296	0	0	0	0	0	0	0	0.0183775	8.68855	0.330105	0.492219	0	0.0686329	0	0	0	0	0	0.00770936
15	Niigata	37	Other metal products	16.6102	0	14.6575	0	64.4521	166.789	0.100531	3.51319	7.81519	18.88	3.21702	0.434111	1.39695	0	2.51808	0	3.20283	0.511395	0	17.7921	25.9003	0	1.20646	4.1011	110.572	1.74009	14.5605	1.99706	7.15748	0	0.0356322	1.96878	0	1.01015	4.52841	187.148	78.9283	125.956	239.89	9.75178	0.518215	53.7373	12.2412	4.3543	1.27309	6.49341
15	Niigata	38	General industrial machinery	0.136425	0	0.499655	0	0	0	0	0	0	0.0558839	0	0	0	0	0	0	0	0	0	0	0	0	0.0131204	2.9657	0	0	0	0.0774479	0.308714	0	0	0.11998	0.0250539	0.0355928	0.132966	0.36443	0.377116	231.261	84.2623	1.03185	0.076081	3.57826	0.903444	0.0565725	0.170886	0.131842
15	Niigata	39	Special industrial machinery	0	0	0	0	0	0	0	0	0	0	0	0	0	0	0	0	0	0	0	0	0	0	0	0	0	0	0	0	0	0	0	0	0	0	0	0	0	2.7856	438.106	0	0	0	0	0.102473	0	0
15	Niigata	40	Other general machines	0	0	1.57152	0	0	0	0	0	0.101525	2.25288	0	0	0	0	0	0	0	0	0	0.0358017	0	0	0	0.658687	0	0	0	0.599142	0.750149	0	0	0.328142	0	0	0.872781	1.5615	1.10016	39.0905	104.835	25.7656	0.0326982	12.1639	3.5363	0.680787	0.257053	0.91533
15	Niigata	41	Machinery for office and service industry	0	0	0	0	0	0	0	0	0	0	0	0	0	0	0	0	0	0	0	0	0	0	0	0	0	0	0	0	0	0	0	0	0	0	0	0	0	0	0	0	0.171025	0	0	0	0	0
15	Niigata	42	Industrial electric equipment	0.13853	0	0.00691857	0	0	0	0	0	0.00685337	0.013619	0	0	0	0	0	0	0	0	0	0	0	0	0	0.00606331	0	0	0	0	0	0	0	0	0	0	0	1.58785	0.0417744	33.7694	29.9621	0.117874	0.0595963	73.408	2.46213	0.909931	0.214734	0.908295
15	Niigata	43	Applied electric equipment and electric mesuring instruments	0	0	0	0	0	0	0	0	0	0	0	0	0	0	0	0	0	0	0	0	0	0	0	0	0	0	0	0	0	0	0	0	0	0	0	0	0	0.0304999	0.611784	0.00428852	0	0.59655	0.757428	0	0	0
15	Niigata	44	Other electric equipment	0.398809	0	0.0199177	0	0.0200203	0	0	0	0	0.137226	0	0	0	0	0	0	0	0	0	0.208728	0	0	0	0.0174555	0	0	0	0	0	0	0	0	0	0	0.0212017	0	0.461009	6.20862	22.5816	0.15836	0.0190634	10.3893	2.79437	15.3404	0.262263	1.68988
15	Niigata	45	Household electric and electric applications	0	0	0	0	0	0	0	0	0	0	0	0	0	0	0	0	0	0	0	0	0	0	0	0	0	0	0	0	0	0	0	0	0	0	0	0	0	0	0	0	0	0	0	0	2.56288	0
15	Niigata	46	Communication equipment	0.00427083	0	0	0	0	0.00205285	0	0	0	0	0	0	0.00197551	0	0	0	0	0	0	0	0.0283264	0	0	0	0.00371394	0	0	0	0	0	0	0	0	0	0.00227048	0.00829714	0	0.0222978	0.0101352	0	0	0.00189862	0.00364936	0	0	0.129535
15	Niigata	47	Electric computing equipment and accessory equipment	0	0	0	0	0	0	0	0	0	0	0	0	0	0	0	0	0	0	0	0	0	0	0	0	0	0	0	0	0	0	0	0	0	0	0	0	0	0	0.278699	0	0	0	0	0	0	0.011905
15	Niigata	48	Semiconductor devices and integrated circuits	0	0	0	0	0	0	0	0	0	0	0	0	0	0	0	0	0	0	0	0	0	0	0	0	0	0	0	0	0	0	0	0	0	0	0	0	0.0740745	0.145736	2.62321	0.0418028	0.0528382	8.55041	11.3606	0.00611171	0.374997	3.73613
15	Niigata	49	Other electrical equipment	0	0	0	0	0	0	0	0	0	0	0	0	3.12459	0	0	0	0	0	0	0	0.0347847	0	0	0	0	0	0	0	0	0	0	0	0	0	0.117102	0.035661	2.32485	6.23801	105.487	0.208253	0.631749	74.3233	95.6779	0.0365367	3.55237	47.8797
15	Niigata	50	Passenger motor cars	0	0	0	0	0	0	0	0	0	0	0	0	0	0	0	0	0	0	0	0	0	0	0	0	0	0	0	0	0	0	0	0	0	0	0	0	0	0	0	0	0	0	0	0	0	0
15	Niigata	51	Other cars	0	0	0	0	0	0	0	0	0	0	0	0	0	0	0	0	0	0	0	0	0	0	0	0	0	0	0	0	0	0	0	0	0	0	0	0	0	0	0	0	0	0	0	0	0	0
15	Niigata	52	Motor vheicle parts and accessories	0	0	0	0	0	0	0	0	0	0	0	0	0	0	0	0	0	0	0	0	0	0	0	0	0	0	0	0	0	0	0	0	0	0	0	0	0	0	0.00156362	0	0	0	0	0	0	0
15	Niigata	53	Other transportation equipment	10.0428	0	0.0110966	0	0	0	0	0	0	0	0	0	0	0	0	0	0	0	0	0	0	0	0	0	0	0	0	0	0	0	0	0	0	0	0	0	0	0	0	0	0	0	0	0	0	0
15	Niigata	54	Precision instruments	1.17905	0	0	0	0.0348168	0	0	0	0	0	0.253302	0.0555443	0	0	0	0	0	0	0	0.0362993	0.0985728	0	0	0.182139	0.0603124	0	0	0.0337483	0.0362179	0	0	0	0	0	0	0.101056	0	11.5873	45.1965	0	0	3.97739	0.563005	0	0	0.433091
15	Niigata	55	Miscellaneous manufacturing products	1.82555	0	0.531586	0	0.422489	0.315298	0.00535589	4.51229	0.257166	0.632715	0.0847535	0.0446035	0.0343495	0.00656405	0	0	0	0	0	0.00647763	0	0	0.0357087	0.0650056	0.0215255	0.178788	0.00672594	0.204762	0.0129262	0	0	0.124679	0	0	0.480319	0.162301	0.0186612	0.205601	0.563927	0.00702077	0	0.0550208	0.105756	0.00615877	0	0.044163
15	Niigata	56	Reuse and recycling	0	0	0	0	0	0	0	0	0	0	0	0	0	0	0	0	0	0	0	0	0	0	0	0	0	0	0	0	0	0	0	0	0	0	0	0	0	0	0	0	0	0	0	0	0	0
15	Niigata	57	Building construction and repair of construction	0	0	0	0	0	0	0	0	0	0	0	0	0	0	0	0	0	0	0	0	0	0	0	0	0	0	0	0	0	0	0	0	0	0	0	0	0	0	0	0	0	0	0	0	0	0
15	Niigata	58	Public construction	0	0	0	0	0	0	0	0	0	0	0	0	0	0	0	0	0	0	0	0	0	0	0	0	0	0	0	0	0	0	0	0	0	0	0	0	0	0	0	0	0	0	0	0	0	0
15	Niigata	59	Other civil enginnering and construction	0	0	0	0	0	0	0	0	0	0	0	0	0	0	0	0	0	0	0	0	0	0	0	0	0	0	0	0	0	0	0	0	0	0	0	0	0	0	0	0	0	0	0	0	0	0
15	Niigata	60	Electricity	83.9783	0	9.72931	0	94.5696	16.3993	10.0023	8.95221	18.025	2.14812	59.923	4.32201	22.1623	7.14853	10.7074	0	19.7184	4.34635	0	8.10155	17.3856	1.03665	3.4331	59.4096	17.0551	4.9015	7.23899	0.794211	18.8337	0	34.4267	15.3814	2.20456	1.51101	6.8017	29.9958	20.6933	19.2421	47.6049	5.64484	0.0251676	14.2778	2.5869	15.0387	0.222584	1.15072
15	Niigata	61	Gas supply and heat supply	0	0	0	0	0	0	0	0	0	0	0	0	0	0	0	0	0	0	0	0	0	0	0	0	0	0	0	0	0	0	0	0	0	0	0	0	0	0	0	0	0	0	0	0	0	0
15	Niigata	62	Water supply and waste management services	0.0426287	0	0.00985185	0	0.115642	0.0388912	0.00347243	0.00218647	0.00413517	0.000821741	0.0627334	0.00147268	0.0128362	0.0113486	0.00569492	0	0.0187539	0.0042583	0	0.026948	0.021225	0	0.00115756	0.0159509	0.0143919	0.00214658	0.0314333	0.000813448	0.0104757	0	0.00661539	0.00288694	0.00184202	0.00104675	0.0051546	0.022734	0.00840193	0.0130125	0.0523668	0.010052	0	0.0121879	0.00128561	0.0081523	0.000157049	0.000894768
15	Niigata	63	Commerce	19.0294	0	0.459551	0	28.8938	4.8156	0.646919	2.54519	1.46512	0.981899	5.16561	0.15791	6.49884	0.307571	0.222172	0	0.819254	0.0328274	0	2.5833	0.57757	0.0281933	0.666304	6.22164	1.11508	0.365436	1.52676	0.0664715	0.886986	0	0.515913	0.369689	0.83639	0.345639	1.03042	6.91515	1.94571	7.51377	15.9265	1.03078	0.0258729	5.58702	1.02302	1.86102	0.0992773	0.539178
15	Niigata	64	Financial and insurance	0	0	0	0	0	0	0	0	0	0	0	0	0	0	0	0	0	0	0	0	0	0	0	0	0	0	0	0	0	0	0	0	0	0	0	0	0	0	0	0	0	0	0	0	0	0
15	Niigata	65	Real estate agencies and rental services	0.00164446	0	0.00190999	0	0.00670018	0.00227941	0.000529586	0.00173504	0.000359478	0.00101513	0.00282837	0.00012251	0.00803118	0.000263676	0.000217135	0	0.000671709	5.412e-05	0	0.00174137	0.00137696	0	0.000375152	0.00446925	0.00109747	0.000245534	0.00286805	7.44362e-05	0.000958598	0	0.00049273	0.000532019	0.000231766	0.000399102	0.000853907	0.00952861	0.00194131	0.00457418	0.0103462	0.00193077	0	0.00549141	0.000588211	0.0023788	5.38917e-05	0.000289983
15	Niigata	66	House rent	0	0	0	0	0	0	0	0	0	0	0	0	0	0	0	0	0	0	0	0	0	0	0	0	0	0	0	0	0	0	0	0	0	0	0	0	0	0	0	0	0	0	0	0	0	0
15	Niigata	67	Transport	30.1076	0.00109635	8.00321	0	10.1943	1.1519	0.302438	0.711694	0.967523	0.450898	3.1924	0.0699634	2.00853	0.275889	0.151672	0	0.851574	0.0103024	0	0.924842	0.234215	0.0999021	0.766463	0.840344	0.215822	0.329305	5.37225	0.0212546	0.359775	0	0.29418	0.337162	0.105011	0.260037	0.776865	4.42331	1.29426	2.65935	5.02085	0.539488	0.00569441	1.17216	0.0992484	0.234155	0.0270461	0.277188
15	Niigata	68	Communication	0.00236092	0	0.000515146	0	0.00191586	0.000528846	0.000272776	0.000754172	0.000147418	0.000281681	0.000821445	3.67138e-05	0.00305884	9.1175e-05	9.46489e-05	0	9.09087e-05	0	0	0.0010557	0.00322517	0	0.000158718	0.00128417	0.000687679	0.000183954	0.000554313	2.2307e-05	0.000389015	0	0.000168756	0.000120951	5.05133e-05	8.37221e-05	0.00120029	0.00779845	0.00100802	0.00300812	0.00362275	0.000565609	0	0.0028175	0.000538619	0.000536086	3.23005e-05	0.000368056
15	Niigata	69	Broadcasting	0	0	0	0	0	0	0	0	0	0	0	0	0	0	0	0	0	0	0	0	0	0	0	0	0	0	0	0	0	0	0	0	0	0	0	0	0	0	0	0	0	0	0	0	0	0
15	Niigata	70	Information services	0	0	0	0	0	0	0	0	0	0	0	0	0	0	0	0	0	0	0	0	0	0	0	0	0	0	0	0	0	0	0	0	0	0	0	0	0	0	0	0	0	0	0	0	0	0
15	Niigata	71	﻿Internet based services	0	0	0	0	0	0	0	0	0	0	0	0	0	0	0	0	0	0	0	0	0	0	0	0	0	0	0	0	0	0	0	0	0	0	0	0	0	0	0	0	0	0	0	0	0	0
15	Niigata	72	Image information production and distribution industry	0	0	0	0	0	0	0	0	0	0	0	0	0	0	0	0	0	0	0	0	0	0	0	0	0	0	0	0	0	0	0	0	0	0	0	0	0	0	0	0	0	0	0	0	0	0
15	Niigata	73	Public administration	0	0	0	0	0	0	0	0	0	0	0	0	0	0	0	0	0	0	0	0	0	0	0	0	0	0	0	0	0	0	0	0	0	0	0	0	0	0	0	0	0	0	0	0	0	0
15	Niigata	74	Education and Research	0.0278018	0	0.00258642	0	0.220157	0.0987842	0.00766683	0.0184932	0.00202267	0.0125943	0.138121	0.00109143	0.0121035	0.0544984	0.0316546	0	0.104396	0.0088716	0	0.734102	0.408952	0.00119258	0.00739217	0.343106	0.101684	0.0870603	0.0943546	0.00795777	0.186316	0	0.0262128	0.0226199	0.000150167	0.0193423	0.100997	0.278399	0.0330146	0.403371	2.55111	0.0108231	0.00299664	1.13113	0.174212	0.298663	0.0134433	0.0888703
15	Niigata	75	Medical service, health and social security and nursing care	0.00245908	0	0.000671279	0	0.00515253	0.00261361	0.000158631	0.000886473	0.000196463	0.000165174	0.00157587	2.44642e-05	0.00161083	0.000194414	0.000157673	0	0.000415385	1.44098e-05	0	0.00235022	0.00115776	6.68282e-05	0.000158643	0.00140389	0.000610979	0.000196124	0.00106245	2.97286e-05	0.000350944	0	0.000253013	0.000131884	0.000201957	4.78184e-05	0.000211118	0.0032492	0.00107471	0.00144988	0.00804673	0.00181949	1.4602e-05	0.00162961	0.000182717	0.000228013	1.4349e-05	0.00031338
15	Niigata	76	Advertising and survery	0	0	0	0	0	0	0	0	0	0	0	0	0	0	0	0	0	0	0	0	0	0	0	0	0	0	0	0	0	0	0	0	0	0	0	0	0	0	0	0	0	0	0	0	0	0
15	Niigata	77	Giids rental and leasing services	0.406565	0	0.0580965	0	0.467166	0.1229	0.0343901	0.0621383	0.0262105	0.0288734	0.114098	0.00322833	0.258383	0.00610837	0.00713375	0	0.023492	0.00108659	0	0.0892136	0.0169149	0	0.0624719	0.2823	0.107668	0.026497	0.226576	0.00560432	0.24178	0	0.0206688	0.0149173	0.0171325	0.00901455	0.0526573	0.355769	0.206073	0.413269	1.2387	0.220175	0.00110108	0.816146	0.0398579	0.0882608	0.00432802	0.0667829
15	Niigata	78	Other business services	0.261795	0	0.0434681	0	0.261116	0.0584534	0.0076668	0.0511107	0.0160831	0.013951	0.0592083	0.00254844	0.267811	0.00894011	0.00870071	0	0.0307962	0.000730247	0	0.0776913	0.025669	0.000376297	0.0110172	0.143194	0.036198	0.0334062	0.101982	0.00125547	0.0473365	0	0.00799398	0.0170801	0.00369584	0.0165144	0.0316394	0.237175	0.0499679	0.129726	0.301084	0.0332724	0.000493324	0.168532	0.0246188	0.0385169	0.0021815	0.0234766
15	Niigata	79	Personal services	0.326956	0	0.00583184	0	0.111376	0.022451	0	0.0119317	0.00288844	0	0.0319851	0	0.0459112	0	0	0	0.003308	0	0	0.0213902	0.00553202	0	0	0.0306655	0.0076158	0	0.00951863	0	0.00304888	0	0	0	0	0.00609298	0.00620779	0.0482066	0.0117376	0.0360248	0.055422	0.00662392	0	0.0674839	0.00498892	0.0174319	0	0.00260417
15	Niigata	80	Activities not elsewhere classified	0	0	0	0	0	0	0	0	0	0	0	0	0	0	0	0	0	0	0	0	0	0	0	0	0	0	0	0	0	0	0	0	0	0	0	0	0	0	0	0	0	0	0	0	0	0
16	Toyama	1	Agriculture, forestry and fishery	87.8082	0	0.00159949	0	180.84	4.02091	0.648609	0.00523598	19.4661	0	0.197381	0	0	0.00849273	0.0115714	0	0.0217747	0	0	0.0251428	0.21545	0	0.0203283	0	2.51627	0	0	0	0.00167242	0	0	0	0	0	0	0	0	0	0	0	0	0	0	0	0	0
16	Toyama	2	Metallic ores	0	0	0	0	0	0	0	0	0	0	0	0	0	0	0	0	0	0	0	0	0	0	0	0	0	0	0	0	0	0	0	0	0	0	0	0	0	0	0	0	0	0	0	0	0	0
16	Toyama	3	Non-metallic ores	0.00154899	0	0.000470894	0	0	0	0	0	0	0	0.0122983	0	0	0.00607212	0.00577047	0	0.000457895	0	0	0.000211489	0.00031906	-0.000294669	0.0435252	0	0.00081992	0.0230608	0.257293	0.0060954	0.0493773	0	0	0.000323068	0	0.00133537	0.000214821	0.000457936	0.000135394	0	0	0.000152814	0	0	0	0	0	0
16	Toyama	4	Coal mining, crude petroleum and natural gas	0	0	0	0	0	0	0	0	0	0	0	0	0	0	0	0	0	0	0	0	0	0	0	0	0	0	0	0	0	0	0	0	0	0	0	0	0	0	0	0	0	0	0	0	0	0
16	Toyama	5	Food and Tobacco	68.3296	0	0	0	102.237	8.10434	-0.00162321	0.0720564	0.00742277	0	0.635306	0.001502	0	0.00596809	0.00387218	0	0.0361291	0	0	0.107975	0.913396	0	0	0.00820884	0	0	0	0.00365041	0.0313403	0	0	0	0	0	0	0	0	0	0	0	0	0	0	0	0	0
16	Toyama	6	Beverage	1.02598	0	0	0	1.51022	15.8938	0	0	0	0	0	0	0	0	0	0	0	0	0	0	0.0370725	0	0	0	0	0	0	0	0	0	0	0	0	0	0	0	0	0	0	0	0	0	0	0	0	0
16	Toyama	7	Textile products	7.03171	0	0	0	0.0605131	0.0965688	31.4899	127.114	0.218664	1.5406	3.522	0.0482691	0.613344	0.277036	0	0	0	0	0	0	0	0	0	0.685891	22.3628	0.0214979	0	0	0.146879	0	0	0	0	0	0.32042	0.39031	0.161559	0.114428	12.892	0	0	0	0	0	0.150993	0.0179222
16	Toyama	8	Wearing aparel and other textile products	10.743	0	0.798987	0	4.31032	0.81764	0.0613433	2.93004	0.410757	0.199087	0.758085	0.405447	0.234178	0.257763	0.020905	0	0.0458947	0	0	0.275567	0.546847	0	0.70112	0.159544	0.431447	0.173354	0.363165	0.0886848	0.412423	0	0.102501	0.106857	0.0223136	0.0422665	0.279909	0.816344	0.447825	0.557472	0.98998	0.126362	0	1.95355	0.346078	0.10077	0.0190245	0.361299
16	Toyama	9	Timber and wooden products	10.269	0	0.181011	0	2.44108	0.377457	0	0.172826	60.6501	21.5274	81.4484	0.120942	0.0419121	0.0160185	0	0	0.034225	0	0	0.0790379	0	0	0	0.31727	0.0787942	0.549418	0.0984811	0.852406	0.520479	0	0	0.18835	0	0	0.883117	3.22723	0.925971	0.0430059	0.114681	0.034266	0	0.201403	0.0387121	0	0	0.0269431
16	Toyama	10	Furniture and fixtures	0.206926	0	0.279031	0	1.28807	0.338172	0	0.338302	0.133082	3.84485	0.387314	0.0662872	0.24886	0.0329235	0.0320418	0	0.0937924	0.019522	0	0.433201	0.715631	0	0.0119403	0.643043	0.719775	0	0.168677	0.110758	0.172891	0	0.0761727	0.0496315	0	0.0215945	0.253016	0.231152	0.145599	0.245533	1.46336	0.0234762	0	0.432352	0.221019	0.0514845	0.0194397	0.406101
16	Toyama	11	Pulp, paper, paperboard, building paper	0.828582	0	0	0	1.72779	0.428908	0.330981	0.197987	2.71177	2.50643	241.359	91.3591	97.4681	0	-0.0131593	0	0	0.408895	0	8.19285	0.942103	0	0	2.67812	3.68029	1.89601	0	0.421792	0.0399404	0	0	0	0.014046	0	0.230412	0.19812	0.153762	0.0242013	0.0242009	0.0867734	0	0.97471	0.0435699	0.0253731	0.0239511	0.261545
16	Toyama	12	Paper products	70.8241	0	0	0	45.8873	21.3433	0.264297	1.34059	0.14548	1.13415	1.68326	0.0815204	0.878911	0.527863	0.0700537	0	0.179428	0.0320111	0	8.96208	10.3414	0	0.0130527	1.81183	1.18024	2.21474	0.0122928	1.2658	0.767805	0	0	0	0.21186	0	0.024051	0.0329591	1.65985	0.0751541	0.0536807	0.115485	0	1.47822	0.289931	0.0562808	0.0743773	0.181609
16	Toyama	13	Publishing, printing	0.0338972	0	0.00629925	0	3.71829	0.267512	0.0252439	0.157234	0.0272995	0.0503746	0.0194336	0.0479804	3.79078	0.00919789	0.0105791	0	0.00446641	0.00297485	0	0.456315	0.153866	0	0.00363904	0.0241524	0.0966577	0.0776044	0.0137087	0.00537021	0.0074098	0	0.00725471	0.0128572	0.000868613	0.00411332	0.0603479	0.0880601	0.113313	0.105512	0.183333	0.0196757	0.000753633	0.0792006	0.0498461	0.000784544	0.0103681	0.0541481
16	Toyama	14	Chemical fertilizer	209.69	0	0	0	0	0.0264196	0	0	0	0	0	0	0	35.8265	1.61711	0	5.51213	0.0259277	0	0.517809	1.01554	0	0	0	0.119494	0	0	0	0.0861079	0	0	0	0	0	0	0	0	0	0	0	0	0	0	0.0273511	0	0
16	Toyama	15	Basic inorganic chemical products	1.07737	0	0.00712675	0	8.53167	1.08372	0.154379	0.425766	0	0.0210432	7.56987	0.0742824	0.00660062	4.26085	5.0306	0	4.10719	0.289445	0	13.6225	7.62568	0	0.0247025	1.86124	10.7897	2.9928	0.100812	0.277744	0.141583	0	0.131323	0.0410716	0.00786175	0.476536	0.227585	1.53167	0.236673	0.298007	0.765325	0.0971364	0	0.41234	0.0609666	0.120714	0.00670288	0.190944
16	Toyama	16	Basic organic chemical products	0	0	0	0	0	0	0	0	0	0	0	0	0	0	0	0	0	0	0	0	0	0	0	0	0	0	0	0	0	0	0	0	0	0	0	0	0	0	0	0	0	0	0	0	0	0
16	Toyama	17	Organic chemical products	0.0339924	0	0.00679073	0	5.8701	5.79709	0.217708	0.0111148	0.0739941	0.0935715	3.32715	0.0326677	0.21384	0.259606	1.05273	0	41.8934	12.8663	0	15.535	16.8319	0	0.0784593	10.629	63.8083	0.116395	0.0221674	0.00661623	3.89811	0	0	0	0	0	0.23854	0.0264155	0.0478363	0.00645355	0.0580811	0.0154261	0	0.199472	0.0464737	0.0135321	0.0255474	0.0242588
16	Toyama	18	Synthetic resins	0	0	0	0	0	0	0.192819	0	0.0104969	0.281603	0.397145	0.076466	0.353322	0	0	0	0	0	0	6.25207	0	0	0	95.2923	0.24909	0	0	0	0.31024	0	0	0	0	0	0.834713	0.0309156	0.0853115	0	0	0.0842523	0	3.11272	0	0.200607	0.0797324	0.170349
16	Toyama	19	Synthetic fibers	0	0	0	0	6.86587	0	93.8262	39.6942	0	0.364815	5.27585	0	0	0	0	0	0	0	0	0	0	0	0.367075	1.06732	0.460992	0	0	0	10.0765	0	0	0	0	0	0	0	0	0	0	0	0	0	0	0	0	0
16	Toyama	20	Final chemical products	55.9816	0	0.70813	0	3.2618	1.09044	0.474855	0.322517	5.96544	1.61818	2.57231	3.36706	13.2539	0.222326	0.127278	0	0.691576	0.186111	0	12.6929	3.49296	0.0269727	1.64345	2.36365	4.01528	0.145123	0.96484	0.0179983	1.11385	0	0.0567331	0.153776	0.00679271	0	0.340839	2.88632	2.237	0.907046	4.27183	0.13988	0.00589354	1.3045	0.321326	0.392657	0.0115829	0.269466
16	Toyama	21	Medicaments	78.885	0	0	0	6.96271	0	0	0.0442888	0	0	0	0	0	0	0	0	0	0	0	1.8148	124.642	0	0	0	0	0	0	0	0	0	0	0	0	0	0	0	0	0	0	0	0	0	0	0	0	0
16	Toyama	22	Petroleum refinery products	55.0122	0	1.51675	0	12.9762	4.21268	0.462081	0.646149	2.33945	0.149966	16.8907	0.810728	1.87304	2.31674	0.966302	0	1.31999	1.53725	0	0.34838	1.31395	0.87979	11.811	1.12896	2.06816	1.50615	1.83128	0.182192	3.52667	0	0.982681	0.552138	0.282683	0.824897	0.530805	1.62319	0.892122	1.11893	1.49408	0.188796	0	0.258923	0.0473982	0.248423	0	0.0432975
16	Toyama	23	Coal products	0	0	1.83419e-05	0	0	0	0	0	0	0	0	0	0	0.000311646	3.79126e-05	0	0.00129011	0	0	0	0	0	0	0	0	0	0	0	0.000872614	0	0.00136039	0.000598995	1.01168e-05	6.70714e-05	3.90487e-05	5.35117e-05	0	8.71561e-06	2.61465e-05	0	0	0	0	0	0	0
16	Toyama	24	Plastic products	58.7975	0	0	0	74.3365	44.0538	0.395909	2.75109	2.82883	4.70596	3.4905	1.03362	46.3088	1.47298	0.522818	0	0.40728	0.0462391	0	16.7077	24.7363	0	0	248.385	88.5232	1.73068	0.142052	0.079496	0.341253	0	0	0	0	0.102295	2.74454	4.45933	1.95421	1.75243	94.2424	0.593117	0.0468558	23.9526	1.36807	16.5194	0.690659	5.46519
16	Toyama	25	Rubber products	0.832015	0	0.134328	0	0.0830895	0.0113655	0.0127904	0.159462	0.0219334	0.0377746	0.0229386	0.022487	0.127146	0.0219458	0.00305116	0	0.0535879	0.00278846	0	0.0448607	0.16803	0	0.0255827	0.0918499	12.4439	0	0.0176684	0	0.0725421	0	0.0911219	0.0411172	0.00162838	0	0.0188555	0.81394	0.0742745	1.30184	4.30386	0.0653884	0.00988976	0.667485	0.111125	0.179434	0.0208252	0.390222
16	Toyama	26	Glass and glass products	0.0514856	0	0	0	1.93198	9.21842	0	0.0263043	0	1.80953	0	0	0.00595379	0	0.059793	0	0.00729272	0	0	0.956598	3.17699	0	0	1.67321	0.542863	1.11562	0.041969	0	0.0537719	0	0	0	0	0	0.417408	0.518872	0.174665	0.0549826	0.0549818	0	0.00615263	0.0514984	0.0274961	0.01281	0.0181381	0.0172232
16	Toyama	27	Cement and cement products	0.0012201	0	0	0	0	0	0	0	0	0	0	0	0	0	0	0	0	0	0	0	0	0	0.000938723	0	0	0	1.67929	0	0.00424761	0	0	0.00117058	0	0	0	0	0.000817621	0	0	0	0	0	0	0	0	0
16	Toyama	28	Pottery, china and earthenware	0	0	0	0	0.0689292	0.00299999	0	0	0	0.067495	0	0	0	0	0.00322149	0	0	0	0	0	0	0	0	0.0109271	0	0	0.0169589	0.100221	0	0	0	0	0	0	0	0	0.00941053	0.0118493	0.0118491	0	0	0.346825	0	0.00621152	0	0.0612443
16	Toyama	29	Other ceramic, stone and clay products	5.80877	0	0	0	0.776781	0	0	0	0.0486044	0.1811	1.58102	0	0.0113611	0.0521055	1.95234	0	0.0417482	0.0695161	0	0.167113	0.61671	0	1.71491	0.268758	0.288343	1.78717	8.27554	0.872457	3.9889	0	0.113018	1.3903	0	5.48523	1.90639	3.26859	1.67884	13.4296	5.11762	0.613041	0	1.57232	0.48271	1.19777	0.0346114	0.186239
16	Toyama	30	Pig iron and crude steel	0	0	0	0	0	0	0	0	0	0	0	0	0	0	0	0	0	0	0	0	0	0	0	0	0	0	0	0	0	0	129.158	3.39093	0.840447	0	0	-0.594814	-1.06906	-0.754637	-2.36586	-0.012188	0	-0.18148	0	-0.0106916	-0.0100924	-0.0191667
16	Toyama	31	steel products	0.112743	0	0.0328459	0	0	0	0.0060986	0	0.0092961	0.454903	0	0	0	0	0	0	0	0	0	0	0	0	0	0.209723	1.14995	0	1.47556	0	0.0956715	0	12.8247	1.04561	5.81545	0	0.0374606	25.9005	14.4163	9.99548	14.138	0.927345	0.004491	3.84048	0.18264	0.586739	0.0595781	0.129909
16	Toyama	32	Cast and forged steel products	0.540619	0	0.0385716	0	0	0	0	0	0	0.227781	0	0	0	0	0	0	0	0	0	0	0	0	0	0	0	0	0.0839411	0.263063	0.161322	0	0	0.963252	0	0	0.739045	35.8223	5.62832	141.787	93.9124	18.707	0.0369172	26.6085	2.47474	0.960784	0.0362775	0.103343
16	Toyama	33	Other iron or steel products	0	0	0	0	0	0	0	0	0	1.63641	0	0	0	0	0	0	0	0	0	0.0118931	0	0	0	0.014919	0	0	0.450738	0.0110573	0.14833	0	0	0.0872053	0	0	0.163087	41.7185	21.5682	14.4255	8.86009	0.302922	0.00543106	1.95978	0	0.571037	0.133424	0.0861522
16	Toyama	34	Non-ferrous metals	0	0	0	0	0	0	0.0123572	0	0	0.0350917	0	0	-0.184921	0	1.61394	0	0.210328	0	0	3.51962	0	0	0	0.0874895	-0.012416	0.450699	0	0.243162	0.328059	0	0.0656985	0.130133	-0.00786615	17.7311	50.2485	-0.631042	2.92777	-0.02033	1.03004	0.0404962	0	1.35831	0.0671008	12.9521	0.00670664	0.0318418
16	Toyama	35	Non-ferrous metal products	0	0	0	0	33.583	15.3285	0.122669	0	0.490832	6.758	0	0.0567542	11.2108	0	0	0	0	0	0	1.26106	3.96166	0	0	6.51373	8.81255	0.075831	0	0.206901	2.66449	0	0	0	0	1.55307	46.9425	763.071	91.9637	208.944	236.051	18.6528	0.135499	136.854	23.7374	126.246	2.72961	20.8619
16	Toyama	36	Metal products for construction and architecture	0.22327	0	0	0	0	0	0	0	0.0315591	0.438999	0	0	0	0	0	0	0	0	0	0	0	0	0	0	0	0	0.346668	0	0	0	0	0	0	0	0.0678262	32.067	1.21832	1.81664	0	0.253305	0	0	0	0	0	0.0284531
16	Toyama	37	Other metal products	2.13081	0	1.88032	0	8.26814	21.3962	0.0128964	0.450684	1.00256	2.422	0.412691	0.0556893	0.179205	0	0.323028	0	0.41087	0.0656035	0	2.28243	3.32257	0	0.154769	0.526104	14.1845	0.223224	1.86787	0.25619	0.918186	0	0.00457102	0.252561	0	0.129585	0.580919	24.0079	10.1252	16.158	30.7739	1.25099	0.0664785	6.8936	1.57034	0.558585	0.163317	0.832997
16	Toyama	38	General industrial machinery	0.0597986	0	0.219011	0	0	0	0	0	0	0.0244953	0	0	0	0	0	0	0	0	0	0	0	0	0.00575098	1.29994	0	0	0	0.0339474	0.135317	0	0	0.0525903	0.0109817	0.0156012	0.0582824	0.159739	0.165299	101.367	36.9343	0.452286	0.0333482	1.56844	0.396002	0.0247972	0.0749039	0.0577897
16	Toyama	39	Special industrial machinery	0	0	0	0	0	0	0	0	0	0	0	0	0	0	0	0	0	0	0	0	0	0	0	0	0	0	0	0	0	0	0	0	0	0	0	0	0	1.97492	310.606	0	0	0	0	0.0726509	0	0
16	Toyama	40	Other general machines	0	0	1.23887	0	0	0	0	0	0.0800342	1.77599	0	0	0	0	0	0	0	0	0	0.0282233	0	0	0	0.519258	0	0	0	0.472316	0.591359	0	0	0.258681	0	0	0.688032	1.23097	0.86728	30.8159	82.6439	20.3116	0.0257767	9.58909	2.78774	0.536679	0.202641	0.721574
16	Toyama	41	Machinery for office and service industry	0	0	0	0	0	0	0	0	0	0	0	0	0	0	0	0	0	0	0	0	0	0	0	0	0	0	0	0	0	0	0	0	0	0	0	0	0	0	0	0	0.0904281	0	0	0	0	0
16	Toyama	42	Industrial electric equipment	0.0522471	0	0.00260937	0	0	0	0	0	0.00258478	0.00513648	0	0	0	0	0	0	0	0	0	0	0	0	0	0.00228681	0	0	0	0	0	0	0	0	0	0	0	0.598867	0.0157554	12.7363	11.3003	0.0444566	0.022477	27.6862	0.928603	0.343185	0.0809879	0.342568
16	Toyama	43	Applied electric equipment and electric mesuring instruments	0	0	0	0	0	0	0	0	0	0	0	0	0	0	0	0	0	0	0	0	0	0	0	0	0	0	0	0	0	0	0	0	0	0	0	0	0	0.0305523	0.612835	0.00429588	0	0.597574	0.758728	0	0	0
16	Toyama	44	Other electric equipment	0.0287112	0	0.00143392	0	0.0014413	0	0	0	0	0.00987921	0	0	0	0	0	0	0	0	0	0.0150268	0	0	0	0.00125666	0	0	0	0	0	0	0	0	0	0	0.00152636	0	0.0331891	0.446972	1.6257	0.0114007	0.00137241	0.747951	0.201173	1.10439	0.0188809	0.121658
16	Toyama	45	Household electric and electric applications	0	0	0	0	0	0	0	0	0	0	0	0	0	0	0	0	0	0	0	0	0	0	0	0	0	0	0	0	0	0	0	0	0	0	0	0	0	0	0	0	0	0	0	0	0.0958564	0
16	Toyama	46	Communication equipment	0.00130487	0	0	0	0	0.000627207	0	0	0	0	0	0	0.00060358	0	0	0	0	0	0	0	0.00865459	0	0	0	0.00113472	0	0	0	0	0	0	0	0	0	0.000693701	0.00253503	0	0.00681265	0.00309661	0	0	0.000580085	0.00111499	0	0	0.039577
16	Toyama	47	Electric computing equipment and accessory equipment	0	0	0	0	0	0	0	0	0	0	0	0	0	0	0	0	0	0	0	0	0	0	0	0	0	0	0	0	0	0	0	0	0	0	0	0	0	0	0.000261753	0	0	0	0	0	0	1.11811e-05
16	Toyama	48	Semiconductor devices and integrated circuits	0	0	0	0	0	0	0	0	0	0	0	0	0	0	0	0	0	0	0	0	0	0	0	0	0	0	0	0	0	0	0	0	0	0	0	0	0.0417569	0.0821535	1.47874	0.0235648	0.0297857	4.82	6.40417	0.00344526	0.211392	2.10611
16	Toyama	49	Other electrical equipment	0	0	0	0	0	0	0	0	0	0	0	0	1.58763	0	0	0	0	0	0	0	0.0176745	0	0	0	0	0	0	0	0	0	0	0	0	0	0.0595006	0.0181197	1.18128	3.1696	53.5991	0.105815	0.320998	37.7645	48.615	0.0185647	1.805	24.3282
16	Toyama	50	Passenger motor cars	0	0	0	0	0	0	0	0	0	0	0	0	0	0	0	0	0	0	0	0	0	0	0	0	0	0	0	0	0	0	0	0	0	0	0	0	0	0	0	0	0	0	0	0	0	0
16	Toyama	51	Other cars	0	0	0	0	0	0	0	0	0	0	0	0	0	0	0	0	0	0	0	0	0	0	0	0	0	0	0	0	0	0	0	0	0	0	0	0	0	0	0	0	0	0	0	0	0	0
16	Toyama	52	Motor vheicle parts and accessories	0	0	0	0	0	0	0	0	0	0	0	0	0	0	0	0	0	0	0	0	0	0	0	0	0	0	0	0	0	0	0	0	0	0	0	0	0	0	0.00340785	0	0	0	0	0	0	0
16	Toyama	53	Other transportation equipment	0.635496	0	0.00070218	0	0	0	0	0	0	0	0	0	0	0	0	0	0	0	0	0	0	0	0	0	0	0	0	0	0	0	0	0	0	0	0	0	0	0	0	0	0	0	0	0	0	0
16	Toyama	54	Precision instruments	0.0411676	0	0	0	0.00121566	0	0	0	0	0	0.00884425	0.00193937	0	0	0	0	0	0	0	0.00126742	0.00344175	0	0	0.00635953	0.00210586	0	0	0.00117835	0.00126458	0	0	0	0	0	0	0.00352845	0	0.404581	1.57807	0	0	0.138874	0.0196578	0	0	0.0151217
16	Toyama	55	Miscellaneous manufacturing products	4.30947	0	1.25489	0	0.997347	0.744307	0.0126434	10.6519	0.607077	1.49362	0.200073	0.105293	0.081087	0.0154954	0	0	0	0	0	0.0152914	0	0	0.0842955	0.153455	0.0508142	0.422056	0.0158776	0.483369	0.0305142	0	0	0.294323	0	0	1.13386	0.383135	0.0440525	0.485352	1.33123	0.0165736	0	0.129884	0.249653	0.0145387	0	0.104253
16	Toyama	56	Reuse and recycling	0.0540717	0	0	0	0.0742401	0.158608	0.00159994	0	0	0	1.02243	0	0	0.204419	0.0229001	0	0.00576063	0	0	0.000483758	0	0.00202208	0	0.723351	0.00120567	0.0573648	0.0848891	0.0341818	0.00241337	0	0.0897411	0.193318	0.0468493	0.522806	0.122845	0	0.000464548	0	0	0	0	0	0	0	0	0
16	Toyama	57	Building construction and repair of construction	0	0	0	0	0	0	0	0	0	0	0	0	0	0	0	0	0	0	0	0	0	0	0	0	0	0	0	0	0	0	0	0	0	0	0	0	0	0	0	0	0	0	0	0	0	0
16	Toyama	58	Public construction	0	0	0	0	0	0	0	0	0	0	0	0	0	0	0	0	0	0	0	0	0	0	0	0	0	0	0	0	0	0	0	0	0	0	0	0	0	0	0	0	0	0	0	0	0	0
16	Toyama	59	Other civil enginnering and construction	0	0	0	0	0	0	0	0	0	0	0	0	0	0	0	0	0	0	0	0	0	0	0	0	0	0	0	0	0	0	0	0	0	0	0	0	0	0	0	0	0	0	0	0	0	0
16	Toyama	60	Electricity	8.24905	0	0.955694	0	9.28942	1.61088	0.982512	0.879361	1.77056	0.211006	5.88614	0.424544	2.17697	0.702188	1.05177	0	1.9369	0.426935	0	0.795803	1.70776	0.101829	0.337228	5.83571	1.6753	0.481467	0.711075	0.0780141	1.85001	0	3.38168	1.51089	0.21655	0.148424	0.66812	2.94644	2.03267	1.89012	4.67615	0.554483	0.00247217	1.40248	0.254107	1.47723	0.021864	0.113033
16	Toyama	61	Gas supply and heat supply	0	0	0	0	0	0	0	0	0	0	0	0	0	0	0	0	0	0	0	0	0	0	0	0	0	0	0	0	0	0	0	0	0	0	0	0	0	0	0	0	0	0	0	0	0	0
16	Toyama	62	Water supply and waste management services	8.51529e-06	0	1.96795e-06	0	2.31001e-05	7.7687e-06	6.93634e-07	4.36757e-07	8.26021e-07	1.64147e-07	1.25313e-05	2.94176e-07	2.5641e-06	2.26694e-06	1.13759e-06	0	3.74617e-06	8.50616e-07	0	5.383e-06	4.2398e-06	0	2.31229e-07	3.18628e-06	2.87486e-06	4.2879e-07	6.27895e-06	1.6249e-07	2.09257e-06	0	1.32146e-06	5.7668e-07	3.67952e-07	2.09092e-07	1.02966e-06	4.54123e-06	1.67833e-06	2.59932e-06	1.04605e-05	2.00793e-06	0	2.4346e-06	2.56807e-07	1.62846e-06	3.13714e-08	1.78734e-07
16	Toyama	63	Commerce	7.57744	0	0.182992	0	11.5054	1.91755	0.257601	1.01348	0.583407	0.390989	2.05693	0.0628791	2.58781	0.122474	0.0884683	0	0.326224	0.0130718	0	1.02866	0.229986	0.0112265	0.26532	2.47744	0.444023	0.145515	0.607949	0.0264687	0.353195	0	0.205435	0.147209	0.333048	0.137632	0.41031	2.75359	0.774776	2.99196	6.34187	0.410452	0.0103025	2.22473	0.407361	0.741053	0.0395319	0.214699
16	Toyama	64	Financial and insurance	0.0449107	0	0.00804431	0	0.0130882	0.00739414	0.00222713	0.00750333	0.00194736	0.00141225	0.00752883	0.000203818	0.0104066	0.00091184	0.000519609	0	0.0016214	6.93632e-05	0	0.00554701	0.00107709	0.000123725	0.000215388	0.00293581	0.00143609	0.00119824	0.00688453	0.000214653	0.00180745	0	0.000947264	0.000504616	0.000710414	0.00177061	0.00111847	0.0166842	0.00252409	0.00642085	0.0169645	0.00316326	1.62204e-05	0.00668777	0.00054125	0.00215574	6.90705e-05	0.000696228
16	Toyama	65	Real estate agencies and rental services	1.19109e-06	0	1.38341e-06	0	4.85295e-06	1.65098e-06	3.8358e-07	1.25669e-06	2.6037e-07	7.35263e-07	2.04859e-06	8.87342e-08	5.817e-06	1.90981e-07	1.57272e-07	0	4.8652e-07	3.91993e-08	0	1.26127e-06	9.97335e-07	0	2.71723e-07	3.23709e-06	7.949e-07	1.77841e-07	2.07733e-06	5.39143e-08	6.94314e-07	0	3.56885e-07	3.85342e-07	1.67869e-07	2.8907e-07	6.18486e-07	6.90159e-06	1.40609e-06	3.31308e-06	7.49378e-06	1.39846e-06	0	3.97744e-06	4.26043e-07	1.72297e-06	3.90338e-08	2.10035e-07
16	Toyama	66	House rent	0	0	0	0	0	0	0	0	0	0	0	0	0	0	0	0	0	0	0	0	0	0	0	0	0	0	0	0	0	0	0	0	0	0	0	0	0	0	0	0	0	0	0	0	0	0
16	Toyama	67	Transport	13.7407	0.000500356	3.65254	0	4.65254	0.525709	0.138028	0.324806	0.441563	0.205783	1.45696	0.0319302	0.916665	0.125912	0.069221	0	0.388645	0.00470184	0	0.422084	0.106892	0.0455938	0.349802	0.38352	0.0984978	0.15029	2.45181	0.00970029	0.164196	0	0.134259	0.153876	0.0479255	0.118677	0.35455	2.01873	0.590678	1.21369	2.29144	0.246214	0.00259884	0.534955	0.0452955	0.106865	0.0123434	0.126504
16	Toyama	68	Communication	0.00214971	0	0.000469061	0	0.00174447	0.000481536	0.000248374	0.000686705	0.00013423	0.000256482	0.000747959	3.34294e-05	0.0027852	8.30185e-05	8.61817e-05	0	8.27761e-05	0	0	0.00096126	0.00293665	0	0.00014452	0.00116929	0.000626159	0.000167498	0.000504725	2.03115e-05	0.000354214	0	0.000153659	0.000110131	4.59944e-05	7.62323e-05	0.00109291	0.00710081	0.000917843	0.00273902	0.00329866	0.00051501	0	0.00256545	0.000490434	0.000488128	2.94109e-05	0.00033513
16	Toyama	69	Broadcasting	0	0	0	0	0	0	0	0	0	0	0	0	0	0	0	0	0	0	0	0	0	0	0	0	0	0	0	0	0	0	0	0	0	0	0	0	0	0	0	0	0	0	0	0	0	0
16	Toyama	70	Information services	0.00196906	0	2.32563e-05	0	0.00130238	0.000895303	4.60594e-05	0.000141385	6.91114e-05	0.000156958	0.00071975	1.33188e-05	0.000803112	0.000109371	2.40352e-05	0	0.000154531	6.27594e-06	0	0.000504837	0.000516849	0	3.83858e-05	0.00073373	0.000202469	0.000113892	0.000285592	1.94217e-05	0.00019106	0	9.183e-05	4.46755e-05	8.42942e-05	6.59508e-05	0.000236945	0.00111466	0.000521567	0.00157237	0.00458127	0.000354715	6.35965e-06	0.00227711	0.000625267	0.00102287	6.24946e-06	0.000225501
16	Toyama	71	﻿Internet based services	6.95105e-06	0	3.47156e-06	0	4.07101e-05	1.11371e-05	2.00535e-06	1.51523e-05	2.29256e-06	5.69472e-06	9.51999e-06	0	6.32337e-05	1.22885e-06	1.19594e-06	0	1.31278e-06	0	0	1.21267e-05	3.95169e-05	0	1.337e-06	3.54948e-05	6.04467e-06	2.47932e-06	8.81411e-06	0	3.62986e-06	0	1.06616e-06	2.22296e-06	0	1.209e-06	1.97085e-05	9.56542e-05	1.63032e-05	3.07924e-05	4.61879e-05	6.57177e-06	0	6.07724e-05	1.08892e-05	1.03768e-05	0	6.2008e-06
16	Toyama	72	Image information production and distribution industry	0.050204	0	0.0185157	0	0.0884026	0.0163351	0.0320868	0.0833412	0.00611374	0.0129085	0.0380815	0.00185567	0.0664516	0.061445	0.00717595	0	0.00875223	0	0	0.06387	0.0424458	0	0.00623958	0.062879	0.0624641	0.01405	0.0705157	0.00300665	0.0516267	0	0.00639724	0.00592813	0.00425527	0.00806033	0.0106759	0.157554	0.0706502	0.0681859	0.115841	0.0236593	0	0.208763	0.0191394	0.0491957	0.00145121	0.0310052
16	Toyama	73	Public administration	0	0	0	0	0	0	0	0	0	0	0	0	0	0	0	0	0	0	0	0	0	0	0	0	0	0	0	0	0	0	0	0	0	0	0	0	0	0	0	0	0	0	0	0	0	0
16	Toyama	74	Education and Research	0.00547735	0	0.000509563	0	0.0433742	0.0194619	0.00151048	0.00364342	0.000398496	0.00248126	0.0272119	0.000215028	0.00238456	0.010737	0.00623641	0	0.0205674	0.00174783	0	0.144629	0.0805694	0.000234955	0.00145636	0.0675969	0.0200332	0.0171521	0.0185892	0.0015678	0.036707	0	0.0051643	0.00445645	2.9585e-05	0.00381072	0.0198979	0.0548486	0.00650435	0.0794699	0.502606	0.00213232	0.000590381	0.222848	0.0343223	0.058841	0.00264852	0.0175087
16	Toyama	75	Medical service, health and social security and nursing care	0.00299571	0	0.000817768	0	0.00627694	0.00318396	0.000193248	0.00107992	0.000239337	0.000201219	0.00191976	2.98029e-05	0.00196235	0.00023684	0.000192082	0	0.000506033	1.75543e-05	0	0.0028631	0.00141041	8.14118e-05	0.000193263	0.00171025	0.00074431	0.000238923	0.0012943	3.62161e-05	0.000427529	0	0.000308227	0.000160664	0.000246029	5.82536e-05	0.000257189	0.00395826	0.00130924	0.00176628	0.00980273	0.00221654	1.77885e-05	0.00198523	0.00022259	0.000277771	1.74803e-05	0.000381767
16	Toyama	76	Advertising and survery	0	0	0	0	0	0	0	0	0	0	0	0	0	0	0	0	0	0	0	0	0	0	0	0	0	0	0	0	0	0	0	0	0	0	0	0	0	0	0	0	0	0	0	0	0	0
16	Toyama	77	Giids rental and leasing services	0.12058	0	0.0172305	0	0.138554	0.0364501	0.0101995	0.0184292	0.00777358	0.00856338	0.0338397	0.000957469	0.0766321	0.00181164	0.00211575	0	0.00696735	0.000322264	0	0.0264593	0.00501666	0	0.0185281	0.0837254	0.0319325	0.00785857	0.0671988	0.00166215	0.0717079	0	0.00613001	0.00442423	0.00508121	0.00267356	0.0156173	0.105515	0.0611179	0.122569	0.367377	0.0653002	0.000326562	0.242055	0.0118212	0.0261767	0.00128362	0.0198067
16	Toyama	78	Other business services	0.000328317	0	5.45133e-05	0	0.000327465	7.33063e-05	9.61492e-06	6.40978e-05	2.01698e-05	1.74959e-05	7.42531e-05	3.19599e-06	0.000335861	1.12118e-05	1.09115e-05	0	3.86215e-05	9.15802e-07	0	9.74325e-05	3.21914e-05	4.71913e-07	1.38167e-05	0.000179579	4.53958e-05	4.18946e-05	0.000127895	1.57448e-06	5.93647e-05	0	1.00252e-05	2.14201e-05	4.63494e-06	2.07107e-05	3.96789e-05	0.00029744	6.26647e-05	0.000162689	0.000377589	4.17269e-05	6.18677e-07	0.000211356	3.08743e-05	4.8304e-05	2.73581e-06	2.9442e-05
16	Toyama	79	Personal services	0.0893115	0	0.00159303	0	0.0304234	0.00613272	0	0.00325927	0.000789008	0	0.00873707	0	0.0125411	0	0	0	0.000903614	0	0	0.00584295	0.00151113	0	0	0.00837661	0.00208034	0	0.00260011	0	0.000832835	0	0	0	0	0.00166436	0.00169572	0.0131681	0.00320624	0.00984054	0.0151391	0.00180939	0	0.0184339	0.00136278	0.00476171	0	0.000711356
16	Toyama	80	Activities not elsewhere classified	0	0	0	0	0	0	0	0	0	0	0	0	0	0	0	0	0	0	0	0	0	0	0	0	0	0	0	0	0	0	0	0	0	0	0	0	0	0	0	0	0	0	0	0	0	0
17	Ishikawa	1	Agriculture, forestry and fishery	83.538	0	0.0015217	0	172.046	3.82537	0.617067	0.00498135	18.5195	0	0.187783	0	0	0.00807973	0.0110087	0	0.0207158	0	0	0.0239201	0.204973	0	0.0193398	0	2.39391	0	0	0	0.00159109	0	0	0	0	0	0	0	0	0	0	0	0	0	0	0	0	0
17	Ishikawa	2	Metallic ores	0	0	0	0	0	0	0	0	0	0	0	0	0	0	0	0	0	0	0	0	0	0	0	0	0	0	0	0	0	0	0	0	0	0	0	0	0	0	0	0	0	0	0	0	0	0
17	Ishikawa	3	Non-metallic ores	0.00643466	0	0.00195614	0	0	0	0	0	0	0	0.0510885	0	0	0.0252242	0.0239711	0	0.00190214	0	0	0.000878545	0.00132541	-0.00122409	0.180808	0	0.00340603	0.0957969	1.06882	0.0253209	0.205118	0	0	0.00134206	0	0.00554727	0.000892389	0.00190231	0.000562438	0	0	0.000634806	0	0	0	0	0	0
17	Ishikawa	4	Coal mining, crude petroleum and natural gas	0	0	0	0	0	0	0	0	0	0	0	0	0	0	0	0	0	0	0	0	0	0	0	0	0	0	0	0	0	0	0	0	0	0	0	0	0	0	0	0	0	0	0	0	0	0
17	Ishikawa	5	Food and Tobacco	163.531	0	0	0	244.68	19.3958	-0.00388476	0.17245	0.0177646	0	1.52045	0.00359467	0	0.0142832	0.00926714	0	0.0864662	0	0	0.258411	2.18599	0	0	0.0196459	0	0	0	0.00873639	0.0750055	0	0	0	0	0	0	0	0	0	0	0	0	0	0	0	0	0
17	Ishikawa	6	Beverage	0.373515	0	0	0	0.549803	5.78624	0	0	0	0	0	0	0	0	0	0	0	0	0	0	0.0134965	0	0	0	0	0	0	0	0	0	0	0	0	0	0	0	0	0	0	0	0	0	0	0	0	0
17	Ishikawa	7	Textile products	18.3568	0	0	0	0.157974	0.2521	82.2069	331.842	0.57084	4.02187	9.19446	0.12601	1.60118	0.723225	0	0	0	0	0	0	0	0	0	1.79057	58.3798	0.0561221	0	0	0.38344	0	0	0	0	0	0.836481	1.01893	0.421761	0.298722	33.6555	0	0	0	0	0	0.39418	0.0467872
17	Ishikawa	8	Wearing aparel and other textile products	6.8599	0	0.510191	0	2.75235	0.522102	0.0391706	1.87097	0.262288	0.127126	0.484073	0.258897	0.149534	0.164594	0.0133489	0	0.0293059	0	0	0.175963	0.349187	0	0.447698	0.101876	0.275499	0.110694	0.231898	0.0566295	0.263352	0	0.0654515	0.0682335	0.0142483	0.0269892	0.178735	0.521274	0.285958	0.355972	0.632149	0.0806878	0	1.24743	0.220987	0.0643464	0.012148	0.230706
17	Ishikawa	9	Timber and wooden products	2.49227	0	0.043931	0	0.592443	0.0916079	0	0.0419444	14.7196	5.22465	19.7673	0.0293522	0.010172	0.00388764	0	0	0.00830633	0	0	0.0191823	0	0	0	0.0770007	0.0191231	0.133342	0.0239011	0.206877	0.126319	0	0	0.0457122	0	0	0.21433	0.783239	0.224731	0.0104374	0.0278327	0.00831628	0	0.0488801	0.00939532	0	0	0.00653902
17	Ishikawa	10	Furniture and fixtures	0.492365	0	0.663934	0	3.06488	0.804655	0	0.804967	0.31666	9.14855	0.921586	0.157726	0.592145	0.0783391	0.0762413	0	0.223172	0.0464513	0	1.03077	1.70279	0	0.0284112	1.53008	1.71265	0	0.401356	0.263541	0.411383	0	0.181247	0.118095	0	0.0513825	0.602033	0.550011	0.346443	0.584229	3.48196	0.0558599	0	1.02875	0.525898	0.122504	0.0462553	0.966289
17	Ishikawa	11	Pulp, paper, paperboard, building paper	0.0564875	0	0	0	0.11779	0.0292402	0.0225642	0.0134975	0.184871	0.170873	16.4543	6.22829	6.64476	0	-0.000897121	0	0	0.0278759	0	0.558537	0.0642267	0	0	0.182578	0.250899	0.129258	0	0.0287552	0.00272289	0	0	0	0.00095757	0	0.0157081	0.0135066	0.0104826	0.00164989	0.00164987	0.00591567	0	0.0664496	0.00297032	0.00172978	0.00163284	0.0178305
17	Ishikawa	12	Paper products	5.30877	0	0	0	3.43957	1.59983	0.0198109	0.100487	0.0109048	0.0850128	0.126172	0.00611052	0.0658806	0.039567	0.00525102	0	0.0134494	0.00239945	0	0.671771	0.775157	0	0.000978392	0.135809	0.0884676	0.16601	0.000921429	0.0948804	0.0575524	0	0	0	0.0158804	0	0.00180279	0.00247052	0.124417	0.00563332	0.00402375	0.00865638	0	0.110803	0.0217323	0.00421864	0.0055751	0.0136129
17	Ishikawa	13	Publishing, printing	0.0793534	0	0.0147466	0	8.70453	0.626247	0.0590961	0.368085	0.0639083	0.117927	0.0454942	0.112322	8.87424	0.0215323	0.0247658	0	0.0104559	0.00696415	0	1.06824	0.360202	0	0.00851901	0.0565409	0.226276	0.181672	0.0320921	0.0125717	0.0173464	0	0.0169833	0.0300988	0.00203343	0.00962931	0.141275	0.206149	0.265265	0.247003	0.429184	0.046061	0.00176426	0.185409	0.11669	0.00183662	0.0242717	0.126761
17	Ishikawa	14	Chemical fertilizer	0	0	0	0	0	0	0	0	0	0	0	0	0	0	0	0	0	0	0	0	0	0	0	0	0	0	0	0	0	0	0	0	0	0	0	0	0	0	0	0	0	0	0	0	0	0
17	Ishikawa	15	Basic inorganic chemical products	0.0106956	0	7.07508e-05	0	0.0846982	0.0107587	0.00153259	0.00422679	0	0.000208906	0.0751499	0.000737439	6.55277e-05	0.0422996	0.0499413	0	0.0407741	0.00287347	0	0.135237	0.0757039	0	0.000245234	0.0184774	0.107115	0.029711	0.00100081	0.00275731	0.00140556	0	0.00130371	0.000407738	7.80475e-05	0.00473081	0.00225935	0.0152057	0.00234957	0.00295846	0.00759777	0.000964322	0	0.00409351	0.000605246	0.00119839	6.65429e-05	0.0018956
17	Ishikawa	16	Basic organic chemical products	0	0	0	0	0	0	0	0	0	0	0	0	0	0	0	0	0	0	0	0	0	0	0	0	0	0	0	0	0	0	0	0	0	0	0	0	0	0	0	0	0	0	0	0	0	0
17	Ishikawa	17	Organic chemical products	0.00930777	0	0.00185943	0	1.60735	1.58735	0.0596125	0.00304345	0.020261	0.0256217	0.911036	0.00894504	0.0585534	0.0710851	0.288256	0	11.4712	3.52304	0	4.25377	4.6089	0	0.0214836	2.91041	17.4719	0.0318713	0.00606986	0.00181165	1.06738	0	0	0	0	0	0.0653168	0.00723306	0.0130985	0.0017671	0.0159037	0.00422395	0	0.0546191	0.0127254	0.00370534	0.00699536	0.00664252
17	Ishikawa	18	Synthetic resins	0	0	0	0	0	0	0.153075	0	0.00833328	0.223559	0.315285	0.0607047	0.280494	0	0	0	0	0	0	4.96338	0	0	0	75.6504	0.197747	0	0	0	0.246293	0	0	0	0	0	0.66266	0.0245432	0.0677269	0	0	0.066886	0	2.47112	0	0.159258	0.0632978	0.135237
17	Ishikawa	19	Synthetic fibers	0	0	0	0	8.32323	0	113.742	48.1198	0	0.442251	6.39571	0	0	0	0	0	0	0	0	0	0	0	0.444991	1.29388	0.558843	0	0	0	12.2154	0	0	0	0	0	0	0	0	0	0	0	0	0	0	0	0	0
17	Ishikawa	20	Final chemical products	5.18948	0	0.0656436	0	0.302368	0.101084	0.044019	0.0298972	0.552995	0.150005	0.238452	0.312126	1.22864	0.0206096	0.0117986	0	0.064109	0.0172525	0	1.17663	0.323797	0.00250037	0.152347	0.21911	0.372216	0.0134529	0.0894405	0.00166844	0.103254	0	0.00525915	0.014255	0.000629683	0	0.0315958	0.267562	0.207369	0.084083	0.395998	0.0129668	0.00054633	0.120927	0.0297869	0.0363993	0.00107373	0.0249795
17	Ishikawa	21	Medicaments	11.4452	0	0	0	1.0102	0	0	0.00642576	0	0	0	0	0	0	0	0	0	0	0	0.263305	18.084	0	0	0	0	0	0	0	0	0	0	0	0	0	0	0	0	0	0	0	0	0	0	0	0	0
17	Ishikawa	22	Petroleum refinery products	0	0	0	0	0	0	0	0	0	0	0	0	0	0	0	0	0	0	0	0	0	0	0	0	0	0	0	0	0	0	0	0	0	0	0	0	0	0	0	0	0	0	0	0	0	0
17	Ishikawa	23	Coal products	0	0	0	0	0	0	0	0	0	0	0	0	0	0	0	0	0	0	0	0	0	0	0	0	0	0	0	0	0	0	0	0	0	0	0	0	0	0	0	0	0	0	0	0	0	0
17	Ishikawa	24	Plastic products	18.3246	0	0	0	23.1674	13.7297	0.123388	0.857395	0.881623	1.46664	1.08784	0.322133	14.4324	0.459063	0.16294	0	0.126931	0.0144107	0	5.20706	7.70924	0	0	77.4106	27.5888	0.539376	0.0442715	0.0247754	0.106354	0	0	0	0	0.031881	0.855353	1.38978	0.609042	0.546157	29.3713	0.184849	0.0146029	7.46498	0.426367	5.14836	0.215248	1.70326
17	Ishikawa	25	Rubber products	0.23831	0	0.0384751	0	0.0237989	0.00325535	0.00366348	0.045674	0.00628228	0.0108196	0.00657019	0.00644085	0.0364179	0.00628583	0.000873928	0	0.0153489	0.000798684	0	0.0128492	0.0481279	0	0.00732753	0.0263081	3.56424	0	0.00506067	0	0.0207779	0	0.0260996	0.011777	0.000466408	0	0.0054007	0.233133	0.0212741	0.372879	1.23273	0.0187289	0.00283267	0.191184	0.0318289	0.0513944	0.00596485	0.111769
17	Ishikawa	26	Glass and glass products	0.00901414	0	0	0	0.338252	1.61397	0	0.00460538	0	0.316813	0	0	0.00104239	0	0.0104686	0	0.00127681	0	0	0.167482	0.556229	0	0	0.292947	0.0950448	0.195323	0.00734796	0	0.00941442	0	0	0	0	0	0.0730801	0.0908445	0.0305805	0.00962638	0.00962625	0	0.00107721	0.00901637	0.00481403	0.00224278	0.00317563	0.00301545
17	Ishikawa	27	Cement and cement products	0.000762392	0	0	0	0	0	0	0	0	0	0	0	0	0	0	0	0	0	0	0	0	0	0.000586569	0	0	0	1.04932	0	0.00265415	0	0	0.000731444	0	0	0	0	0.000510898	0	0	0	0	0	0	0	0	0
17	Ishikawa	28	Pottery, china and earthenware	0	0	0	0	0.223268	0.00971725	0	0	0	0.218623	0	0	0	0	0.0104347	0	0	0	0	0	0	0	0	0.0353938	0	0	0.0549314	0.324624	0	0	0	0	0	0	0	0	0.0304816	0.0383809	0.0383804	0	0	1.1234	0	0.0201197	0	0.198376
17	Ishikawa	29	Other ceramic, stone and clay products	1.97209	0	0	0	0.263719	0	0	0	0.0165013	0.0614838	0.53676	0	0.00385712	0.0176899	0.662825	0	0.0141736	0.0236009	0	0.0567354	0.209374	0	0.582215	0.0912439	0.0978932	0.606749	2.80957	0.296201	1.35424	0	0.0383699	0.47201	0	1.86225	0.647223	1.10969	0.56997	4.55937	1.73744	0.208129	0	0.533806	0.163881	0.406644	0.0117506	0.0632284
17	Ishikawa	30	Pig iron and crude steel	0	0	0	0	0	0	0	0	0	0	0	0	0	0	0	0	0	0	0	0	0	0	0	0	0	0	0	0	0	0	0	0	0	0	0	0	0	0	0	0	0	0	0	0	0	0
17	Ishikawa	31	steel products	0.0130647	0	0.00380619	0	0	0	0.000706709	0	0.00107724	0.0527143	0	0	0	0	0	0	0	0	0	0	0	0	0	0.0243028	0.133257	0	0.170989	0	0.0110865	0	1.48614	0.121166	0.673897	0	0.00434096	3.00136	1.67056	1.15828	1.63831	0.107461	0.00052042	0.445037	0.0211644	0.0679916	0.00690394	0.0150539
17	Ishikawa	32	Cast and forged steel products	0.0981642	0	0.00700372	0	0	0	0	0	0	0.0413599	0	0	0	0	0	0	0	0	0	0	0	0	0	0	0	0	0.0152418	0.0477663	0.0292924	0	0	0.174905	0	0	0.134194	6.50451	1.02197	25.7453	17.0524	3.39677	0.00670332	4.8315	0.449357	0.174457	0.00658718	0.0187648
17	Ishikawa	33	Other iron or steel products	0	0	0	0	0	0	0	0	0	0.47749	0	0	0	0	0	0	0	0	0	0.00347031	0	0	0	0.00435324	0	0	0.131522	0.00322642	0.0432815	0	0	0.0254458	0	0	0.0475874	12.1731	6.29343	4.20924	2.5853	0.0883903	0.00158474	0.571847	0	0.166624	0.0389321	0.0251385
17	Ishikawa	34	Non-ferrous metals	0	0	0	0	0	0	0	0	0	0	0	0	0	0	0	0	0	0	0	0	0	0	0	0	0	0	0	0	0	0	0	0	0	0	0	0	0	0	0	0	0	0	0	0	0	0
17	Ishikawa	35	Non-ferrous metal products	0	0	0	0	3.05388	1.3939	0.0111549	0	0.0446339	0.614539	0	0.00516095	1.01946	0	0	0	0	0	0	0.114675	0.360254	0	0	0.592327	0.80137	0.0068957	0	0.0188146	0.242296	0	0	0	0	0.141228	4.26872	69.3899	8.36273	19.0004	21.4654	1.6962	0.0123217	12.4448	2.15857	11.4802	0.248218	1.89708
17	Ishikawa	36	Metal products for construction and architecture	0.0100693	0	0	0	0	0	0	0	0.00142328	0.0197984	0	0	0	0	0	0	0	0	0	0	0	0	0	0	0	0	0.0156344	0	0	0	0	0	0	0	0.00305889	1.44619	0.0549452	0.0819288	0	0.0114238	0	0	0	0	0	0.00128321
17	Ishikawa	37	Other metal products	2.67786	0	2.36306	0	10.3908	26.8893	0.0162074	0.566389	1.25995	3.0438	0.518642	0.0699865	0.225213	0	0.40596	0	0.516354	0.0824461	0	2.8684	4.17559	0	0.194503	0.661172	17.8261	0.280533	2.34741	0.321962	1.15391	0	0.00574455	0.317402	0	0.162854	0.730061	30.1716	12.7247	20.3063	38.6745	1.57216	0.0835457	8.66341	1.9735	0.701992	0.205245	1.04685
17	Ishikawa	38	General industrial machinery	0.0911541	0	0.33385	0	0	0	0	0	0	0.0373395	0	0	0	0	0	0	0	0	0	0	0	0	0.00876652	1.98157	0	0	0	0.0517477	0.206271	0	0	0.0801661	0.01674	0.0237818	0.0888429	0.243498	0.251974	154.519	56.3008	0.689443	0.0508344	2.39085	0.603646	0.0377996	0.11418	0.0880918
17	Ishikawa	39	Special industrial machinery	0	0	0	0	0	0	0	0	0	0	0	0	0	0	0	0	0	0	0	0	0	0	0	0	0	0	0	0	0	0	0	0	0	0	0	0	0	4.10349	645.376	0	0	0	0	0.150954	0	0
17	Ishikawa	40	Other general machines	0	0	0.238814	0	0	0	0	0	0.0154281	0.342355	0	0	0	0	0	0	0	0	0	0.00544055	0	0	0	0.100096	0	0	0	0.0910477	0.113995	0	0	0.0498656	0	0	0.132631	0.237292	0.167184	5.94034	15.9311	3.91543	0.00496893	1.84847	0.537389	0.103455	0.0390627	0.139097
17	Ishikawa	41	Machinery for office and service industry	0	0	0	0	0	0	0	0	0	0	0	0	0	0	0	0	0	0	0	0	0	0	0	0	0	0	0	0	0	0	0	0	0	0	0	0	0	0	0	0	0.1068	0	0	0	0	0
17	Ishikawa	42	Industrial electric equipment	0.0827187	0	0.00413121	0	0	0	0	0	0.00409228	0.00813218	0	0	0	0	0	0	0	0	0	0	0	0	0	0.00362052	0	0	0	0	0	0	0	0	0	0	0	0.948138	0.0249443	20.1644	17.8909	0.0703847	0.0355861	43.8334	1.47018	0.543338	0.128222	0.542361
17	Ishikawa	43	Applied electric equipment and electric mesuring instruments	0	0	0	0	0	0	0	0	0	0	0	0	0	0	0	0	0	0	0	0	0	0	0	0	0	0	0	0	0	0	0	0	0	0	0	0	0	0.0502838	1.00862	0.00707027	0	0.983504	1.24873	0	0	0
17	Ishikawa	44	Other electric equipment	0.0381452	0	0.00190508	0	0.00191489	0	0	0	0	0.0131254	0	0	0	0	0	0	0	0	0	0.0199643	0	0	0	0.00166958	0	0	0	0	0	0	0	0	0	0	0.00202789	0	0.0440945	0.593841	2.15988	0.0151468	0.00182337	0.993716	0.267275	1.46728	0.0250849	0.161633
17	Ishikawa	45	Household electric and electric applications	0	0	0	0	0	0	0	0	0	0	0	0	0	0	0	0	0	0	0	0	0	0	0	0	0	0	0	0	0	0	0	0	0	0	0	0	0	0	0	0	0	0	0	0	0.0201025	0
17	Ishikawa	46	Communication equipment	1.34915e-05	0	0	0	0	6.48492e-06	0	0	0	0	0	0	6.24063e-06	0	0	0	0	0	0	0	8.9483e-05	0	0	0	1.17323e-05	0	0	0	0	0	0	0	0	0	7.17242e-06	2.62106e-05	0	7.04385e-05	3.2017e-05	0	0	5.99772e-06	1.15283e-05	0	0	0.000409201
17	Ishikawa	47	Electric computing equipment and accessory equipment	0	0	0	0	0	0	0	0	0	0	0	0	0	0	0	0	0	0	0	0	0	0	0	0	0	0	0	0	0	0	0	0	0	0	0	0	0	0	0.122828	0	0	0	0	0	0	0.00524677
17	Ishikawa	48	Semiconductor devices and integrated circuits	0	0	0	0	0	0	0	0	0	0	0	0	0	0	0	0	0	0	0	0	0	0	0	0	0	0	0	0	0	0	0	0	0	0	0	0	0.0143456	0.0282239	0.508024	0.00809573	0.0102329	1.65591	2.20016	0.00118362	0.0726238	0.723557
17	Ishikawa	49	Other electrical equipment	0	0	0	0	0	0	0	0	0	0	0	0	1.39007	0	0	0	0	0	0	0	0.0154751	0	0	0	0	0	0	0	0	0	0	0	0	0	0.0520964	0.0158649	1.03428	2.77518	46.9293	0.0926478	0.281054	33.0651	42.5654	0.0162545	1.58039	21.3008
17	Ishikawa	50	Passenger motor cars	0	0	0	0	0	0	0	0	0	0	0	0	0	0	0	0	0	0	0	0	0	0	0	0	0	0	0	0	0	0	0	0	0	0	0	0	0	0	0	0	0	0	0	0	0	0
17	Ishikawa	51	Other cars	0	0	0	0	0	0	0	0	0	0	0	0	0	0	0	0	0	0	0	0	0	0	0	0	0	0	0	0	0	0	0	0	0	0	0	0	0	0	0	0	0	0	0	0	0	0
17	Ishikawa	52	Motor vheicle parts and accessories	0	0	0	0	0	0	0	0	0	0	0	0	0	0	0	0	0	0	0	0	0	0	0	0	0	0	0	0	0	0	0	0	0	0	0	0	0	0	0.00241122	0	0	0	0	0	0	0
17	Ishikawa	53	Other transportation equipment	7.49271	0	0.00827894	0	0	0	0	0	0	0	0	0	0	0	0	0	0	0	0	0	0	0	0	0	0	0	0	0	0	0	0	0	0	0	0	0	0	0	0	0	0	0	0	0	0	0
17	Ishikawa	54	Precision instruments	0.0345799	0	0	0	0.00102113	0	0	0	0	0	0.007429	0.00162904	0	0	0	0	0	0	0	0.00106461	0.002891	0	0	0.00534188	0.00176888	0	0	0.000989791	0.00106222	0	0	0	0	0	0	0.00296383	0	0.33984	1.32555	0	0	0.116651	0.0165122	0	0	0.012702
17	Ishikawa	55	Miscellaneous manufacturing products	2.00127	0	0.582756	0	0.463157	0.345648	0.00587144	4.94664	0.28192	0.693619	0.0929118	0.048897	0.0376559	0.0071959	0	0	0	0	0	0.00710116	0	0	0.0391459	0.0712629	0.0235976	0.195998	0.00737337	0.224472	0.0141705	0	0	0.136681	0	0	0.526553	0.177924	0.0204575	0.225392	0.61821	0.00769658	0	0.060317	0.115936	0.0067516	0	0.0484141
17	Ishikawa	56	Reuse and recycling	0.0496652	0	0	0	0.06819	0.145683	0.00146956	0	0	0	0.939106	0	0	0.18776	0.0210339	0	0.00529118	0	0	0.000444335	0	0.00185729	0	0.664402	0.00110741	0.0526899	0.0779712	0.0313962	0.00221669	0	0.0824277	0.177564	0.0430314	0.480201	0.112834	0	0.00042669	0	0	0	0	0	0	0	0	0
17	Ishikawa	57	Building construction and repair of construction	0	0	0	0	0	0	0	0	0	0	0	0	0	0	0	0	0	0	0	0	0	0	0	0	0	0	0	0	0	0	0	0	0	0	0	0	0	0	0	0	0	0	0	0	0	0
17	Ishikawa	58	Public construction	0	0	0	0	0	0	0	0	0	0	0	0	0	0	0	0	0	0	0	0	0	0	0	0	0	0	0	0	0	0	0	0	0	0	0	0	0	0	0	0	0	0	0	0	0	0
17	Ishikawa	59	Other civil enginnering and construction	0	0	0	0	0	0	0	0	0	0	0	0	0	0	0	0	0	0	0	0	0	0	0	0	0	0	0	0	0	0	0	0	0	0	0	0	0	0	0	0	0	0	0	0	0	0
17	Ishikawa	60	Electricity	12.0074	0	1.39111	0	13.5217	2.3448	1.43015	1.28	2.57724	0.307141	8.5679	0.617968	3.16881	1.02211	1.53096	0	2.81937	0.621449	0	1.15837	2.48583	0.148222	0.490871	8.4945	2.43857	0.700826	1.03504	0.113558	2.69288	0	4.92239	2.19926	0.315212	0.216047	0.97252	4.28885	2.95877	2.75127	6.80663	0.807109	0.0035985	2.04146	0.369879	2.15026	0.0318254	0.164532
17	Ishikawa	61	Gas supply and heat supply	0.000563347	0	0.000187568	0	0.165533	0.0384511	0.0021128	0.00122802	0.000929003	0.000553834	0.137335	0.0022558	0.00138977	0.0117519	0.0019385	0	0.00489414	0.0363178	0	0.00294843	0.035407	0	0.000866856	0.0292599	0.0231881	0.0225049	0.00204097	0.00182748	0.00411854	0	0.0342172	0.00972863	0.000413825	0.000391934	0.00618944	0.0233481	0.0160443	0.0139039	0.0165775	0.00234348	0	0.0120211	0.00128366	0.0112132	0	0.000167514
17	Ishikawa	62	Water supply and waste management services	0.00400991	0	0.000926723	0	0.010878	0.00365833	0.000326637	0.000205672	0.000388979	7.72979e-05	0.00590107	0.000138529	0.00120745	0.00106752	0.000535698	0	0.0017641	0.000400561	0	0.00253489	0.00199655	0	0.000108887	0.00150044	0.00135379	0.00020192	0.0029568	7.65177e-05	0.000985405	0	0.000622282	0.000271562	0.000173271	9.84631e-05	0.000484872	0.0021385	0.000790335	0.00122404	0.00492593	0.000945548	0	0.00114647	0.000120932	0.000766854	1.4773e-05	8.41672e-05
17	Ishikawa	63	Commerce	21.3168	0	0.51479	0	32.3669	5.39444	0.72468	2.85112	1.64123	1.09993	5.78652	0.176891	7.28001	0.344541	0.248878	0	0.917729	0.0367733	0	2.89382	0.646995	0.0315822	0.746394	6.9695	1.24912	0.409362	1.71028	0.0744615	0.993603	0	0.577926	0.414126	0.936926	0.387186	1.15428	7.74637	2.17959	8.41694	17.8409	1.15468	0.0289829	6.2586	1.14598	2.08472	0.111211	0.603988
17	Ishikawa	64	Financial and insurance	0.326254	0	0.0584378	0	0.0950793	0.0537147	0.016179	0.0545079	0.0141466	0.0102593	0.0546931	0.00148064	0.0755984	0.00662406	0.0037747	0	0.0117786	0.000503888	0	0.0402962	0.00782453	0.000898802	0.00156468	0.0213271	0.0104324	0.00870461	0.0500126	0.00155935	0.0131302	0	0.0068814	0.00366578	0.0051608	0.0128626	0.00812509	0.121202	0.0183362	0.0466442	0.123239	0.0229795	0.000117833	0.0485833	0.00393191	0.0156603	0.000501762	0.00505774
17	Ishikawa	65	Real estate agencies and rental services	0.000280039	0	0.000325255	0	0.00114099	0.000388165	9.01842e-05	0.000295464	6.12162e-05	0.000172869	0.000481649	2.08625e-05	0.00136765	4.49018e-05	3.69764e-05	0	0.000114387	9.21621e-06	0	0.000296541	0.000234485	0	6.38854e-05	0.000761078	0.00018689	4.18124e-05	0.000488406	1.26759e-05	0.000163242	0	8.3908e-05	9.05986e-05	3.9468e-05	6.79639e-05	0.000145414	0.00162265	0.000330589	0.000778946	0.00176188	0.000328794	0	0.000935143	0.000100168	0.000405091	9.17732e-06	4.93818e-05
17	Ishikawa	66	House rent	0	0	0	0	0	0	0	0	0	0	0	0	0	0	0	0	0	0	0	0	0	0	0	0	0	0	0	0	0	0	0	0	0	0	0	0	0	0	0	0	0	0	0	0	0	0
17	Ishikawa	67	Transport	16.9603	0.000617597	4.50839	0	5.7427	0.64889	0.17037	0.400913	0.545027	0.254001	1.79835	0.039412	1.13145	0.155415	0.0854405	0	0.479711	0.00580355	0	0.520985	0.131938	0.0562771	0.431766	0.473385	0.121577	0.185505	3.02631	0.0119732	0.20267	0	0.165718	0.189931	0.0591552	0.146485	0.437626	2.49175	0.729083	1.49807	2.82836	0.303906	0.00320779	0.660303	0.0559089	0.131905	0.0152357	0.156146
17	Ishikawa	68	Communication	0.029155	0	0.00636153	0	0.0236589	0.00653071	0.00336851	0.00931327	0.00182046	0.00347847	0.010144	0.000453378	0.0377736	0.00112592	0.00116882	0	0.00112263	0	0	0.0130369	0.0398275	0	0.00196001	0.0158582	0.00849214	0.00227164	0.00684521	0.000275469	0.00480394	0	0.00208396	0.00149362	0.000623788	0.00103388	0.0148223	0.096303	0.012448	0.0371473	0.0447373	0.0069847	0	0.0347933	0.0066514	0.00662011	0.000398879	0.00454512
17	Ishikawa	69	Broadcasting	0	0	0	0	0	0	0	0	0	0	0	0	0	0	0	0	0	0	0	0	0	0	0	0	0	0	0	0	0	0	0	0	0	0	0	0	0	0	0	0	0	0	0	0	0	0
17	Ishikawa	70	Information services	0.926828	0	0.0109466	0	0.613024	0.421415	0.0216799	0.066549	0.0325304	0.0738792	0.338783	0.00626907	0.378021	0.0514801	0.0113133	0	0.0727369	0.00295405	0	0.237624	0.243278	0	0.018068	0.345363	0.0953012	0.0536082	0.134427	0.0091417	0.089931	0	0.0432239	0.0210285	0.0396768	0.0310427	0.111529	0.524666	0.245499	0.740105	2.15638	0.166962	0.00299345	1.07182	0.29431	0.481458	0.00294159	0.106142
17	Ishikawa	71	﻿Internet based services	0.000166047	0	8.29285e-05	0	0.000972482	0.000266043	4.79037e-05	0.000361959	5.47647e-05	0.000136035	0.000227413	0	0.00151053	2.93548e-05	2.85687e-05	0	3.13597e-05	0	0	0.000289683	0.00094398	0	3.19382e-05	0.000847899	0.000144395	5.9226e-05	0.000210551	0	8.671e-05	0	2.54685e-05	5.31021e-05	0	2.88806e-05	0.000470797	0.00228499	0.000389452	0.000735568	0.00110334	0.000156986	0	0.00145173	0.000260121	0.000247881	0	0.000148125
17	Ishikawa	72	Image information production and distribution industry	0.0691595	0	0.0255067	0	0.121781	0.0225027	0.0442018	0.114808	0.0084221	0.0177824	0.0524599	0.00255632	0.0915417	0.0846447	0.00988537	0	0.0120568	0	0	0.0879853	0.058472	0	0.00859545	0.0866202	0.0860486	0.0193549	0.0971402	0.00414187	0.0711193	0	0.00881264	0.00816641	0.00586192	0.0111037	0.0147068	0.217042	0.0973255	0.0939307	0.159579	0.0325923	0	0.287585	0.0263658	0.0677705	0.00199914	0.0427118
17	Ishikawa	73	Public administration	0	0	0	0	0	0	0	0	0	0	0	0	0	0	0	0	0	0	0	0	0	0	0	0	0	0	0	0	0	0	0	0	0	0	0	0	0	0	0	0	0	0	0	0	0	0
17	Ishikawa	74	Education and Research	0.00911077	0	0.000847584	0	0.0721466	0.0323721	0.00251246	0.0060603	0.000662839	0.00412721	0.045263	0.000357668	0.00396638	0.0178594	0.0103734	0	0.034211	0.00290727	0	0.240569	0.134015	0.000390813	0.00242245	0.112438	0.0333223	0.0285301	0.0309205	0.0026078	0.0610568	0	0.00859006	0.00741266	4.92104e-05	0.00633858	0.0330973	0.0912327	0.0108191	0.132187	0.836011	0.0035468	0.000982014	0.370676	0.0570902	0.0978734	0.00440543	0.0291232
17	Ishikawa	75	Medical service, health and social security and nursing care	0.00247867	0	0.000676627	0	0.00519358	0.00263443	0.000159895	0.000893536	0.000198029	0.00016649	0.00158842	2.46592e-05	0.00162366	0.000195963	0.00015893	0	0.000418695	1.45246e-05	0	0.00236895	0.00116698	6.73607e-05	0.000159907	0.00141508	0.000615848	0.000197687	0.00107091	2.99655e-05	0.00035374	0	0.000255029	0.000132935	0.000203566	4.81994e-05	0.0002128	0.00327509	0.00108327	0.00146143	0.00811084	0.00183398	1.47183e-05	0.00164259	0.000184173	0.00022983	1.44633e-05	0.000315877
17	Ishikawa	76	Advertising and survery	0.0322283	0	0.0264136	0	1.20137	1.15865	0.0157346	0.0655248	0.00981176	0.053213	0.183725	0.00794164	0.0714797	0.0201605	0.0115165	0	0.0117052	0.000779622	0	3.16894	0.308497	0	0.00143053	0.207251	0.0481472	0.0101689	0.0363756	0.00482528	0.0336595	0	0.013689	0.00713541	0.00546332	0.0150917	0.0215266	0.286568	0.0386254	0.202778	0.378879	0.0304698	0.00118503	0.267075	0.0476631	0.0489342	0.00543433	0.042019
17	Ishikawa	77	Giids rental and leasing services	0.74168	0	0.105983	0	0.852232	0.224201	0.0627366	0.113356	0.0478147	0.0526727	0.208145	0.00588932	0.471358	0.0111433	0.0130138	0	0.0428556	0.00198222	0	0.162749	0.0308571	0	0.113965	0.514988	0.196414	0.0483375	0.413334	0.0102237	0.441069	0	0.0377052	0.0272131	0.0312541	0.0164449	0.0960606	0.649015	0.375931	0.75391	2.2597	0.401657	0.00200866	1.48886	0.0727112	0.161011	0.00789543	0.121829
17	Ishikawa	78	Other business services	0.225152	0	0.037384	0	0.224568	0.0502718	0.00659369	0.0439568	0.013832	0.0119983	0.0509211	0.00219174	0.230326	0.00768879	0.00748289	0	0.0264857	0.000628036	0	0.066817	0.0220762	0.000323627	0.00947516	0.123151	0.0311314	0.0287304	0.0877076	0.00107974	0.0407109	0	0.00687508	0.0146894	0.00317854	0.0142029	0.0272109	0.203978	0.042974	0.111568	0.258942	0.0286153	0.000424275	0.144943	0.0211729	0.0331258	0.00187616	0.0201906
17	Ishikawa	79	Personal services	0.176103	0	0.0031411	0	0.0599884	0.0120924	0	0.00642657	0.00155575	0	0.0172276	0	0.0247283	0	0	0	0.00178173	0	0	0.011521	0.00297961	0	0	0.0165169	0.00410197	0	0.00512686	0	0.00164217	0	0	0	0	0.00328176	0.00334359	0.0259647	0.00632201	0.0194034	0.029851	0.00356773	0	0.0363477	0.0026871	0.00938906	0	0.00140264
17	Ishikawa	80	Activities not elsewhere classified	0	0	0	0	0	0	0	0	0	0	0	0	0	0	0	0	0	0	0	0	0	0	0	0	0	0	0	0	0	0	0	0	0	0	0	0	0	0	0	0	0	0	0	0	0	0
18	Fukui	1	Agriculture, forestry and fishery	43.2319	0	0.0007875	0	89.0358	1.97967	0.319339	0.00257791	9.58405	0	0.0971797	0	0	0.00418135	0.00569713	0	0.0107207	0	0	0.0123789	0.106076	0	0.0100086	0	1.23887	0	0	0	0.000823409	0	0	0	0	0	0	0	0	0	0	0	0	0	0	0	0	0
18	Fukui	2	Metallic ores	0	0	0	0	0	0	0	0	0	0	0	0	0	0	0	0	0	0	0	0	0	0	0	0	0	0	0	0	0	0	0	0	0	0	0	0	0	0	0	0	0	0	0	0	0	0
18	Fukui	3	Non-metallic ores	0	0	0	0	0	0	0	0	0	0	0	0	0	0	0	0	0	0	0	0	0	0	0	0	0	0	0	0	0	0	0	0	0	0	0	0	0	0	0	0	0	0	0	0	0	0
18	Fukui	4	Coal mining, crude petroleum and natural gas	0	0	0	0	0	0	0	0	0	0	0	0	0	0	0	0	0	0	0	0	0	0	0	0	0	0	0	0	0	0	0	0	0	0	0	0	0	0	0	0	0	0	0	0	0	0
18	Fukui	5	Food and Tobacco	82.9432	0	0	0	124.102	9.8376	-0.00197036	0.087467	0.00901027	0	0.771178	0.00182323	0	0.00724448	0.00470032	0	0.0438559	0	0	0.131067	1.10874	0	0	0.00996445	0	0	0	0.00443112	0.038043	0	0	0	0	0	0	0	0	0	0	0	0	0	0	0	0	0
18	Fukui	6	Beverage	0.176172	0	0	0	0.259321	2.72914	0	0	0	0	0	0	0	0	0	0	0	0	0	0	0.00636576	0	0	0	0	0	0	0	0	0	0	0	0	0	0	0	0	0	0	0	0	0	0	0	0	0
18	Fukui	7	Textile products	35.2515	0	0	0	0.303365	0.48412	157.866	637.251	1.09621	7.72337	17.6565	0.241983	3.07483	1.38884	0	0	0	0	0	0	0	0	0	3.43852	112.109	0.107774	0	0	0.736336	0	0	0	0	0	1.60633	1.9567	0.809927	0.573649	64.6303	0	0	0	0	0	0.756961	0.0898476
18	Fukui	8	Wearing aparel and other textile products	32.4819	0	2.41578	0	13.0325	2.47218	0.185475	8.85911	1.24194	0.601949	2.29211	1.22589	0.70805	0.77936	0.0632074	0	0.138765	0	0	0.833191	1.65342	0	2.11987	0.482388	1.3045	0.524143	1.09805	0.268143	1.24698	0	0.309916	0.323089	0.0674664	0.127795	0.84632	2.46826	1.35402	1.68555	2.99325	0.382061	0	5.90665	1.04638	0.304683	0.0575215	1.0924
18	Fukui	9	Timber and wooden products	5.16028	0	0.0909598	0	1.22666	0.189676	0	0.0868467	30.4772	10.8177	40.9286	0.0607743	0.0210612	0.00804942	0	0	0.0171984	0	0	0.0397173	0	0	0	0.159431	0.0395948	0.276088	0.0494877	0.428342	0.261546	0	0	0.0946478	0	0	0.443774	1.62171	0.465309	0.0216109	0.0576281	0.017219	0	0.101207	0.0194532	0	0	0.0135392
18	Fukui	10	Furniture and fixtures	0.149202	0	0.201193	0	0.928755	0.243836	0	0.24393	0.0959577	2.7723	0.279269	0.0477958	0.179438	0.0237392	0.0231035	0	0.0676282	0.0140762	0	0.312356	0.515999	0	0.00860948	0.463661	0.518988	0	0.121623	0.0798611	0.124662	0	0.0549237	0.0357863	0	0.0155705	0.182435	0.16667	0.104983	0.17704	1.05514	0.0169273	0	0.311743	0.159364	0.0371225	0.0140168	0.292816
18	Fukui	11	Pulp, paper, paperboard, building paper	0.216728	0	0	0	0.451929	0.112187	0.086573	0.0517864	0.709303	0.655593	63.1309	23.8963	25.4942	0	-0.00344202	0	0	0.106952	0	2.14296	0.246421	0	0	0.700503	0.962635	0.495929	0	0.110326	0.010447	0	0	0	0.00367395	0	0.0602678	0.0518212	0.0402188	0.0063302	0.00633011	0.0226969	0	0.25495	0.0113964	0.00663672	0.00626478	0.0684111
18	Fukui	12	Paper products	41.0488	0	0	0	26.5957	12.3703	0.153183	0.776991	0.0843184	0.657341	0.975596	0.0472482	0.509406	0.305943	0.0406023	0	0.103994	0.0185532	0	5.19431	5.99372	0	0.00756518	1.05011	0.684055	1.28364	0.00712473	0.73364	0.44501	0	0	0	0.122791	0	0.0139397	0.0191027	0.962027	0.0435583	0.0311127	0.0669334	0	0.856761	0.16804	0.0326197	0.0431082	0.105258
18	Fukui	13	Publishing, printing	0.061108	0	0.011356	0	6.70313	0.482257	0.0455084	0.283453	0.0492142	0.0908127	0.0350339	0.0864966	6.83382	0.0165815	0.0190715	0	0.00805181	0.00536291	0	0.822621	0.277382	0	0.00656028	0.0435407	0.17425	0.139901	0.0247133	0.00968113	0.013358	0	0.0130784	0.0231783	0.00156589	0.00741528	0.108792	0.15875	0.204274	0.190211	0.330504	0.0354704	0.00135861	0.142779	0.08986	0.00141433	0.018691	0.0976153
18	Fukui	14	Chemical fertilizer	0	0	0	0	0	0	0	0	0	0	0	0	0	0	0	0	0	0	0	0	0	0	0	0	0	0	0	0	0	0	0	0	0	0	0	0	0	0	0	0	0	0	0	0	0	0
18	Fukui	15	Basic inorganic chemical products	1.68362	0	0.0111371	0	13.3326	1.69355	0.24125	0.66535	0	0.0328845	11.8295	0.116082	0.0103149	6.65848	7.86138	0	6.41836	0.45232	0	21.2881	11.9167	0	0.0386029	2.90858	16.8612	4.67688	0.15754	0.434035	0.221253	0	0.205221	0.0641831	0.0122856	0.744688	0.35565	2.39356	0.369852	0.465699	1.19598	0.151796	0	0.644369	0.0952733	0.188642	0.0104747	0.298391
18	Fukui	16	Basic organic chemical products	0	0	0	0	0.00158839	0	0	0	0	0	0.0043335	0	0.0160995	0.177881	0	0	13.865	0.156719	0	0.245092	0.0284812	0	0	0.00138491	0.0357699	0.0203146	0	0	0.00330462	0	0	0.00151784	0	0	0	0	0	0.00750894	0	0	0	0	0	0	0	0
18	Fukui	17	Organic chemical products	0.00929257	0	0.00185639	0	1.60472	1.58476	0.0595152	0.00303848	0.0202279	0.0255798	0.909548	0.00893043	0.0584578	0.070969	0.287786	0	11.4525	3.51729	0	4.24683	4.60137	0	0.0214486	2.90566	17.4434	0.0318192	0.00605994	0.00180869	1.06563	0	0	0	0	0	0.0652101	0.00722125	0.0130771	0.00176422	0.0158777	0.00421705	0	0.0545299	0.0127046	0.00369929	0.00698393	0.00663167
18	Fukui	18	Synthetic resins	0	0	0	0	0	0	0.182758	0	0.00994922	0.266909	0.376423	0.0724761	0.334886	0	0	0	0	0	0	5.92584	0	0	0	90.3201	0.236093	0	0	0	0.294052	0	0	0	0	0	0.791159	0.0293025	0.08086	0	0	0.0798561	0	2.9503	0	0.19014	0.075572	0.161461
18	Fukui	19	Synthetic fibers	0	0	0	0	5.63353	0	76.9856	32.5696	0	0.299335	4.3289	0	0	0	0	0	0	0	0	0	0	0	0.301189	0.875753	0.37825	0	0	0	8.26793	0	0	0	0	0	0	0	0	0	0	0	0	0	0	0	0	0
18	Fukui	20	Final chemical products	78.7863	0	0.996595	0	4.59053	1.53465	0.668293	0.453897	8.39552	2.27736	3.62016	4.73867	18.6531	0.312893	0.179126	0	0.973298	0.261925	0	17.8635	4.91586	0.0379604	2.31292	3.32651	5.65095	0.204241	1.35788	0.0253301	1.56759	0	0.0798439	0.216418	0.00955979	0	0.479684	4.0621	3.14826	1.27654	6.01201	0.196861	0.00829434	1.8359	0.452222	0.552611	0.0163013	0.379237
18	Fukui	21	Medicaments	13.1705	0	0	0	1.16248	0	0	0.00739437	0	0	0	0	0	0	0	0	0	0	0	0.302995	20.81	0	0	0	0	0	0	0	0	0	0	0	0	0	0	0	0	0	0	0	0	0	0	0	0	0
18	Fukui	22	Petroleum refinery products	0.232439	0	0.00640861	0	0.0548273	0.0177995	0.00195239	0.00273012	0.00988467	0.000633639	0.0713669	0.0034255	0.00791401	0.00978874	0.00408283	0	0.00557723	0.00649523	0	0.00147198	0.00555172	0.0037173	0.0499039	0.00477009	0.00873841	0.00636379	0.00773755	0.0007698	0.014901	0	0.00415204	0.0023329	0.0011944	0.00348537	0.00224276	0.00685834	0.00376941	0.00472771	0.0063128	0.000797702	0	0.00109401	0.000200268	0.00104964	0	0.000182941
18	Fukui	23	Coal products	0	0	0.00320024	0	0	0	0	0	0	0	0	0	0	0.0543749	0.00661485	0	0.225094	0	0	0	0	0	0	0	0	0	0	0	0.152251	0	0.237355	0.104511	0.00176514	0.0117024	0.00681308	0.00933654	0	0.00152067	0.00456194	0	0	0	0	0	0	0
18	Fukui	24	Plastic products	43.2936	0	0	0	54.7352	32.4376	0.291514	2.02568	2.08292	3.46508	2.57012	0.76107	34.098	1.08458	0.38496	0	0.299887	0.0340466	0	12.3022	18.2138	0	0	182.89	65.1812	1.27433	0.104596	0.0585342	0.25127	0	0	0	0	0.0753219	2.02085	3.28348	1.43892	1.29035	69.3923	0.436722	0.0345007	17.6367	1.00733	12.1635	0.508544	4.02412
18	Fukui	25	Rubber products	0.0286562	0	0.00462652	0	0.00286176	0.000391447	0.000440524	0.00549217	0.000755428	0.00130103	0.000790048	0.000774495	0.00437915	0.000755854	0.000105088	0	0.00184567	9.60396e-05	0	0.00154508	0.00578725	0	0.000881116	0.00316348	0.42859	0	0.000608532	0	0.00249848	0	0.00313841	0.00141615	5.60843e-05	0	0.00064942	0.0280336	0.00255815	0.0448377	0.148233	0.0022521	0.000340622	0.0229894	0.00382734	0.00618005	0.000717257	0.01344
18	Fukui	26	Glass and glass products	0.0975248	0	0	0	3.65958	17.4616	0	0.049826	0	3.42763	0	0	0.0112777	0	0.113261	0	0.013814	0	0	1.812	6.01789	0	0	3.16941	1.0283	2.11321	0.0794982	0	0.101855	0	0	0	0	0	0.79066	0.982854	0.330853	0.104149	0.104147	0	0.0116544	0.0975489	0.0520834	0.0242648	0.0343574	0.0326245
18	Fukui	27	Cement and cement products	0.00924808	0	0	0	0	0	0	0	0	0	0	0	0	0	0	0	0	0	0	0	0	0	0.00711529	0	0	0	12.7286	0	0.0321958	0	0	0.00887268	0	0	0	0	0.00619737	0	0	0	0	0	0	0	0	0
18	Fukui	28	Pottery, china and earthenware	0	0	0	0	0.0294542	0.00128193	0	0	0	0.0288414	0	0	0	0	0.00137658	0	0	0	0	0	0	0	0	0.00466926	0	0	0.00724672	0.0428255	0	0	0	0	0	0	0	0	0.00402123	0.00506333	0.00506326	0	0	0.148202	0	0.00265425	0	0.0261704
18	Fukui	29	Other ceramic, stone and clay products	1.01538	0	0	0	0.135782	0	0	0	0.00849606	0.0316563	0.276363	0	0.00198593	0.00910806	0.34127	0	0.00729761	0.0121514	0	0.0292115	0.107801	0	0.299767	0.046979	0.0504025	0.312398	1.44657	0.152506	0.697261	0	0.0197556	0.243025	0	0.958821	0.333237	0.57135	0.293462	2.34749	0.894562	0.10716	0	0.274842	0.0843778	0.20937	0.00605008	0.0325546
18	Fukui	30	Pig iron and crude steel	0	0	0	0	0	0	0	0	0	0	0	0	0	0	0	0	0	0	0	0	0	0	0	0	0	0	0	0	0	0	50.7099	1.33135	0.329976	0	0	-0.233536	-0.419734	-0.296285	-0.928881	-0.00478526	0	-0.0712526	0	-0.00419773	-0.00396247	-0.00752522
18	Fukui	31	steel products	0.0097613	0	0.0028438	0	0	0	0.000528017	0	0.000804857	0.0393855	0	0	0	0	0	0	0	0	0	0	0	0	0	0.0181578	0.0995629	0	0.127754	0	0.00828324	0	1.11037	0.0905289	0.503502	0	0.00324334	2.24246	1.24816	0.865409	1.22407	0.0802896	0.000388831	0.332509	0.0158129	0.0507999	0.00515828	0.0112475
18	Fukui	32	Cast and forged steel products	0.00291498	0	0.000207975	0	0	0	0	0	0	0.00122818	0	0	0	0	0	0	0	0	0	0	0	0	0	0	0	0	0.000452605	0.00141842	0.000869835	0	0	0.00519379	0	0	0.00398488	0.193151	0.0303475	0.764505	0.506369	0.100867	0.000199055	0.143471	0.0133436	0.00518048	0.000195606	0.00055722
18	Fukui	33	Other iron or steel products	0	0	0	0	0	0	0	0	0	0.104782	0	0	0	0	0	0	0	0	0	0.000761533	0	0	0	0.000955285	0	0	0.0288615	0.000708014	0.0094978	0	0	0.00558389	0	0	0.0104427	2.6713	1.38105	0.923685	0.567325	0.0193966	0.000347759	0.125488	0	0.0365643	0.00854335	0.00551646
18	Fukui	34	Non-ferrous metals	0	0	0	0	0	0	0.00373161	0	0	0.0105969	0	0	-0.0558421	0	0.487374	0	0.0635145	0	0	1.06285	0	0	0	0.0264199	-0.00374937	0.136101	0	0.0734298	0.0990668	0	0.0198395	0.0392973	-0.00237541	5.3544	15.174	-0.190561	0.884124	-0.00613923	0.31105	0.012229	0	0.41018	0.020263	3.91125	0.00202526	0.00961554
18	Fukui	35	Non-ferrous metal products	0	0	0	0	6.8506	3.12686	0.0250231	0	0.100125	1.37856	0	0.0115773	2.28689	0	0	0	0	0	0	0.257244	0.808138	0	0	1.32874	1.79767	0.0154688	0	0.0422057	0.54353	0	0	0	0	0.31681	9.57579	155.659	18.7597	42.6225	48.1521	3.80499	0.0276405	27.9169	4.8422	25.7529	0.556814	4.25562
18	Fukui	36	Metal products for construction and architecture	0.0318789	0	0	0	0	0	0	0	0.00450607	0.0626812	0	0	0	0	0	0	0	0	0	0	0	0	0	0	0	0	0.049498	0	0	0	0	0	0	0	0.00968436	4.5786	0.173955	0.259384	0	0.0361674	0	0	0	0	0	0.00406259
18	Fukui	37	Other metal products	2.08348	0	1.83854	0	8.08445	20.9209	0.0126099	0.440671	0.980287	2.36819	0.403522	0.0544521	0.175224	0	0.315852	0	0.401742	0.064146	0	2.23172	3.24876	0	0.151331	0.514416	13.8694	0.218265	1.82637	0.250498	0.897787	0	0.00446947	0.24695	0	0.126707	0.568014	23.4746	9.90025	15.7991	30.0902	1.2232	0.0650016	6.74045	1.53546	0.546175	0.159688	0.814491
18	Fukui	38	General industrial machinery	0.0116976	0	0.0428422	0	0	0	0	0	0	0.00479169	0	0	0	0	0	0	0	0	0	0	0	0	0.00112499	0.25429	0	0	0	0.00664066	0.0264702	0	0	0.0102875	0.00214821	0.00305186	0.011401	0.0312475	0.0323352	19.8291	7.22495	0.0884745	0.00652346	0.306813	0.0774645	0.00485073	0.0146524	0.0113046
18	Fukui	39	Special industrial machinery	0	0	0	0	0	0	0	0	0	0	0	0	0	0	0	0	0	0	0	0	0	0	0	0	0	0	0	0	0	0	0	0	0	0	0	0	0	0.743446	116.926	0	0	0	0	0.027349	0	0
18	Fukui	40	Other general machines	0	0	0.101184	0	0	0	0	0	0.00653675	0.145053	0	0	0	0	0	0	0	0	0	0.00230512	0	0	0	0.04241	0	0	0	0.0385761	0.0482989	0	0	0.0211277	0	0	0.0561946	0.100539	0.0708346	2.51687	6.74989	1.65894	0.0021053	0.783183	0.227687	0.0438329	0.0165506	0.0589341
18	Fukui	41	Machinery for office and service industry	0	0	0	0	0	0	0	0	0	0	0	0	0	0	0	0	0	0	0	0	0	0	0	0	0	0	0	0	0	0	0	0	0	0	0	0	0	0	0	0	0.10841	0	0	0	0	0
18	Fukui	42	Industrial electric equipment	0.1082	0	0.0054038	0	0	0	0	0	0.00535288	0.0106372	0	0	0	0	0	0	0	0	0	0	0	0	0	0.0047358	0	0	0	0	0	0	0	0	0	0	0	1.24021	0.0326283	26.3759	23.4021	0.0920662	0.0465482	57.3359	1.92306	0.710709	0.16772	0.709431
18	Fukui	43	Applied electric equipment and electric mesuring instruments	0	0	0	0	0	0	0	0	0	0	0	0	0	0	0	0	0	0	0	0	0	0	0	0	0	0	0	0	0	0	0	0	0	0	0	0	0	0.000714338	0.0143286	0.000100441	0	0.0139718	0.0177397	0	0	0
18	Fukui	44	Other electric equipment	0.313105	0	0.0156374	0	0.0157179	0	0	0	0	0.107736	0	0	0	0	0	0	0	0	0	0.163872	0	0	0	0.0137043	0	0	0	0	0	0	0	0	0	0	0.0166454	0	0.361939	4.87439	17.7289	0.124329	0.0149667	8.15667	2.19386	12.0438	0.205903	1.32673
18	Fukui	45	Household electric and electric applications	0	0	0	0	0	0	0	0	0	0	0	0	0	0	0	0	0	0	0	0	0	0	0	0	0	0	0	0	0	0	0	0	0	0	0	0	0	0	0	0	0	0	0	0	0.0604147	0
18	Fukui	46	Communication equipment	0.00128668	0	0	0	0	0.000618465	0	0	0	0	0	0	0.000595167	0	0	0	0	0	0	0	0.00853397	0	0	0	0.00111891	0	0	0	0	0	0	0	0	0	0.000684032	0.0024997	0	0.00671769	0.00305345	0	0	0.000572	0.00109945	0	0	0.0390254
18	Fukui	47	Electric computing equipment and accessory equipment	0	0	0	0	0	0	0	0	0	0	0	0	0	0	0	0	0	0	0	0	0	0	0	0	0	0	0	0	0	0	0	0	0	0	0	0	0	0	0.00157472	0	0	0	0	0	0	6.72662e-05
18	Fukui	48	Semiconductor devices and integrated circuits	0	0	0	0	0	0	0	0	0	0	0	0	0	0	0	0	0	0	0	0	0	0	0	0	0	0	0	0	0	0	0	0	0	0	0	0	0.00720694	0.0141791	0.25522	0.00406712	0.00514079	0.831897	1.10531	0.000594628	0.0364847	0.3635
18	Fukui	49	Other electrical equipment	0	0	0	0	0	0	0	0	0	0	0	0	2.06381	0	0	0	0	0	0	0	0.0229755	0	0	0	0	0	0	0	0	0	0	0	0	0	0.0773464	0.0235543	1.53558	4.12025	69.6749	0.137552	0.417274	49.091	63.1959	0.0241327	2.34636	31.6249
18	Fukui	50	Passenger motor cars	0	0	0	0	0	0	0	0	0	0	0	0	0	0	0	0	0	0	0	0	0	0	0	0	0	0	0	0	0	0	0	0	0	0	0	0	0	0	0	0	0	0	0	0	0	0
18	Fukui	51	Other cars	0	0	0	0	0	0	0	0	0	0	0	0	0	0	0	0	0	0	0	0	0	0	0	0	0	0	0	0	0	0	0	0	0	0	0	0	0	0	0	0	0	0	0	0	0	0
18	Fukui	52	Motor vheicle parts and accessories	0	0	0	0	0	0	0	0	0	0	0	0	0	0	0	0	0	0	0	0	0	0	0	0	0	0	0	0	0	0	0	0	0	0	0	0	0	0	0.00167144	0	0	0	0	0	0	0
18	Fukui	53	Other transportation equipment	0.10694	0	0.000118161	0	0	0	0	0	0	0	0	0	0	0	0	0	0	0	0	0	0	0	0	0	0	0	0	0	0	0	0	0	0	0	0	0	0	0	0	0	0	0	0	0	0	0
18	Fukui	54	Precision instruments	0.44046	0	0	0	0.0130066	0	0	0	0	0	0.0946265	0.0207498	0	0	0	0	0	0	0	0.0135604	0.036824	0	0	0.0680419	0.022531	0	0	0.0126074	0.01353	0	0	0	0	0	0	0.0377516	0	4.32869	16.8841	0	0	1.48584	0.210323	0	0	0.161791
18	Fukui	55	Miscellaneous manufacturing products	0.730895	0	0.212831	0	0.169152	0.126236	0.00214434	1.80659	0.102961	0.25332	0.0339328	0.0178579	0.0137525	0.00262805	0	0	0	0	0	0.00259345	0	0	0.0142967	0.0260263	0.00861818	0.0715815	0.00269286	0.0819804	0.00517526	0	0	0.0499178	0	0	0.192305	0.0649805	0.00747139	0.0823166	0.22578	0.00281091	0	0.0220287	0.0423417	0.00246579	0	0.0176816
18	Fukui	56	Reuse and recycling	0.0843217	0	0	0	0.115773	0.247341	0.00249502	0	0	0	1.59442	0	0	0.318779	0.0357114	0	0.00898338	0	0	0.000754394	0	0.00315332	0	1.12803	0.00188017	0.0894572	0.13238	0.0533047	0.00376351	0	0.139946	0.301469	0.0730589	0.815287	0.191571	0	0.000724437	0	0	0	0	0	0	0	0	0
18	Fukui	57	Building construction and repair of construction	0	0	0	0	0	0	0	0	0	0	0	0	0	0	0	0	0	0	0	0	0	0	0	0	0	0	0	0	0	0	0	0	0	0	0	0	0	0	0	0	0	0	0	0	0	0
18	Fukui	58	Public construction	0	0	0	0	0	0	0	0	0	0	0	0	0	0	0	0	0	0	0	0	0	0	0	0	0	0	0	0	0	0	0	0	0	0	0	0	0	0	0	0	0	0	0	0	0	0
18	Fukui	59	Other civil enginnering and construction	0	0	0	0	0	0	0	0	0	0	0	0	0	0	0	0	0	0	0	0	0	0	0	0	0	0	0	0	0	0	0	0	0	0	0	0	0	0	0	0	0	0	0	0	0	0
18	Fukui	60	Electricity	79.4975	0	9.21018	0	89.5237	15.5243	9.46863	8.47455	17.0632	2.0335	56.7257	4.0914	20.9798	6.76711	10.1361	0	18.6663	4.11445	0	7.66928	16.458	0.981339	3.24992	56.2397	16.1451	4.63997	6.85274	0.751835	17.8288	0	32.5898	14.5607	2.08693	1.43039	6.43879	28.3953	19.5892	18.2154	45.0648	5.34365	0.0238247	13.516	2.44887	14.2363	0.210707	1.08932
18	Fukui	61	Gas supply and heat supply	2.06151e-05	0	6.86386e-06	0	0.00605751	0.00140708	7.73158e-05	4.49382e-05	3.39959e-05	2.0267e-05	0.00502565	8.25489e-05	5.08572e-05	0.000430048	7.09376e-05	0	0.000179096	0.00132901	0	0.000107895	0.00129568	0	3.17217e-05	0.00107074	0.000848546	0.000823543	7.46872e-05	6.68748e-05	0.000150714	0	0.00125215	0.000356009	1.51435e-05	1.43424e-05	0.000226496	0.000854399	0.000587125	0.000508798	0.000606635	8.57572e-05	0	0.000439898	4.69742e-05	0.000410335	0	6.13002e-06
18	Fukui	62	Water supply and waste management services	5.93764e-05	0	1.37224e-05	0	0.000161075	5.41705e-05	4.83666e-06	3.04547e-06	5.75978e-06	1.14458e-06	8.73798e-05	2.05127e-06	1.78793e-05	1.58072e-05	7.93231e-06	0	2.61218e-05	5.93128e-06	0	3.75353e-05	2.95638e-05	0	1.61234e-06	2.22177e-05	2.00462e-05	2.98992e-06	4.37826e-05	1.13303e-06	1.45913e-05	0	9.21441e-06	4.02114e-06	2.5657e-06	1.45799e-06	7.17971e-06	3.16656e-05	1.17028e-05	1.81248e-05	7.29404e-05	1.40011e-05	0	1.69763e-05	1.79069e-06	1.13551e-05	2.1875e-07	1.2463e-06
18	Fukui	63	Commerce	0.186512	0	0.00450418	0	0.283196	0.0471989	0.00634062	0.024946	0.01436	0.00962385	0.0506295	0.00154771	0.0636968	0.00301458	0.00217757	0	0.00802972	0.00032175	0	0.0253196	0.00566092	0.00027633	0.00653061	0.0609799	0.0109292	0.00358174	0.0149641	0.000651505	0.00869358	0	0.00505659	0.00362341	0.00819768	0.0033877	0.0100994	0.0677772	0.0190704	0.0736444	0.1561	0.0101029	0.000253587	0.0547599	0.0100268	0.0182404	0.000973043	0.00528462
18	Fukui	64	Financial and insurance	0.000855985	0	0.000153322	0	0.000249458	0.00014093	4.24485e-05	0.000143011	3.71161e-05	2.69171e-05	0.000143497	3.88471e-06	0.000198346	1.73794e-05	9.9036e-06	0	3.09033e-05	1.32204e-06	0	0.000105724	2.0529e-05	2.35817e-06	4.10523e-06	5.59556e-05	2.73714e-05	2.28381e-05	0.000131217	4.09123e-06	3.44494e-05	0	1.80546e-05	9.61782e-06	1.35403e-05	3.37474e-05	2.13176e-05	0.000317996	4.81084e-05	0.000122379	0.000323339	6.02908e-05	3.09156e-07	0.000127467	1.03161e-05	4.10877e-05	1.31646e-06	1.32699e-05
18	Fukui	65	Real estate agencies and rental services	0	0	0	0	0	0	0	0	0	0	0	0	0	0	0	0	0	0	0	0	0	0	0	0	0	0	0	0	0	0	0	0	0	0	0	0	0	0	0	0	0	0	0	0	0	0
18	Fukui	66	House rent	0	0	0	0	0	0	0	0	0	0	0	0	0	0	0	0	0	0	0	0	0	0	0	0	0	0	0	0	0	0	0	0	0	0	0	0	0	0	0	0	0	0	0	0	0	0
[truncated: 2,338 more rows]
[truncated: 406 more columns]
